# Supplementary material for: Gene expression dynamics during the gonocyte to spermatogonia transition and spermatogenesis in the domestic yak
Source: J Anim Sci Biotechnol. 2019 Jul 12;10:64. doi: 10.1186/s40104-019-0360-7 (PMC6624888; doi:10.1186/s40104-019-0360-7)
Supplement: Supplementary file 1 — Table S1. Comparative analysis of transcriptomes between 3 and 5 months old yak testes. (XLSX 3910 kb) [file 40104_2019_360_MOESM1_ESM.xlsx]

## Sheet: 40104_2019_360_MOESM1_ESM
id	Ygon_count	Yspg_count	Ygon_fpkm	Yspg_fpkm	log2(FC)	Pvalue	FDR	significant	Symbol	Description	KEGG_A_class	KEGG_B_class	Pathway	K_ID	GO Component	GO Function	GO Process
XP_005898952	0	1313.79	0.001	312.693	18.2544	3.45e-18	2.82e-15	up	CETN1	centrin-1 [Bos taurus]	-	-	-	-	GO:0044422//organelle part;GO:0005815//microtubule organizing center;GO:0044430//cytoskeletal part;GO:0072372//primary cilium;GO:0031513//nonmotile primary cilium;GO:0042995//cell projection;GO:0043228//non-membrane-bounded organelle;GO:0005856//cytoskeleton;GO:0005623//cell;GO:0005813//centrosome;GO:0005929//cilium;GO:0043232//intracellular non-membrane-bounded organelle;GO:0044424//intracellula…	GO:0008092//cytoskeletal protein binding;GO:0043167//ion binding;GO:0046872//metal ion binding;GO:0032403//protein complex binding;GO:0005488//binding;GO:0043169//cation binding;GO:0015631//tubulin binding;GO:0044877//macromolecular complex binding;GO:0005515//protein binding	GO:0009987//cellular process;GO:0007049//cell cycle;GO:0009408//response to heat;GO:0009628//response to abiotic stimulus;GO:0050896//response to stimulus;GO:0009266//response to temperature stimulus;GO:0044699//single-organism process;GO:0044763//single-organism cellular process;GO:0000278//mitotic cell cycle;GO:0006950//response to stress
XP_014333722	0	200.95	0.001	135.633	17.0494	1.95e-08	1.16e-06	up	CISD1	PREDICTED: CDGSH iron-sulfur domain-containing protein 1 isoform X2 [Bos taurus]	-	-	-	-	GO:0005623//cell;GO:0044464//cell part;GO:0043231//intracellular membrane-bounded organelle;GO:0044424//intracellular part;GO:0031224//intrinsic component of membrane;GO:0044429//mitochondrial part;GO:1903561//extracellular vesicle;GO:0005576//extracellular region;GO:0043226//organelle;GO:0031967//organelle envelope;GO:0044446//intracellular organelle part;GO:0031966//mitochondrial membrane;GO:00…	GO:0051536//iron-sulfur cluster binding;GO:0043169//cation binding;GO:0051540//metal cluster binding;GO:0005488//binding;GO:0043167//ion binding	GO:0019222//regulation of metabolic process;GO:0043467//regulation of generation of precursor metabolites and energy;GO:0065007//biological regulation;GO:0050794//regulation of cellular process;GO:0031323//regulation of cellular metabolic process;GO:0050789//regulation of biological process
XP_014333723	0	200.95	0.001	135.633	17.0494	1.95e-08	1.16e-06	up	CISD1	PREDICTED: CDGSH iron-sulfur domain-containing protein 1 isoform X2 [Bos taurus]	-	-	-	-	GO:0043226//organelle;GO:0005576//extracellular region;GO:0044421//extracellular region part;GO:0031090//organelle membrane;GO:0031975//envelope;GO:0005622//intracellular;GO:0044425//membrane part;GO:0044422//organelle part;GO:0043229//intracellular organelle;GO:0043231//intracellular membrane-bounded organelle;GO:0031967//organelle envelope;GO:0044464//cell part;GO:1903561//extracellular vesicle…	GO:0051540//metal cluster binding;GO:0005488//binding;GO:0043167//ion binding;GO:0051536//iron-sulfur cluster binding;GO:0043169//cation binding	GO:0050794//regulation of cellular process;GO:0065007//biological regulation;GO:0043467//regulation of generation of precursor metabolites and energy;GO:0019222//regulation of metabolic process;GO:0031323//regulation of cellular metabolic process;GO:0050789//regulation of biological process
XP_005887384	0	2034.91	0.001	135.223	17.045	1.08e-07	5.3e-06	up	ACTB	actin, cytoplasmic 1 [Homo sapiens]	Cellular Processes	Cellular commiunity;Cell motility;Transport and catabolism	ko04510//Focal adhesion;ko04810//Regulation of actin cytoskeleton;ko04145//Phagosome;ko04530//Tight junction;ko04520//Adherens junction	K05692	GO:0043227//membrane-bounded organelle;GO:0043232//intracellular non-membrane-bounded organelle;GO:0000785//chromatin;GO:0044427//chromosomal part;GO:0045202//synapse;GO:0070161//anchoring junction;GO:0043234//protein complex;GO:0030054//cell junction;GO:0005737//cytoplasm;GO:1990234//transferase complex;GO:1902494//catalytic complex;GO:0005654//nucleoplasm;GO:0031982//vesicle;GO:0005622//intrace…	GO:0005198//structural molecule activity;GO:0008092//cytoskeletal protein binding;GO:0003690//double-stranded DNA binding;GO:0003682//chromatin binding;GO:0032549//ribonucleoside binding;GO:0000975//regulatory region DNA binding;GO:0019900//kinase binding;GO:0032550//purine ribonucleoside binding;GO:0001067//regulatory region nucleic acid binding;GO:0001012//RNA polymerase II regulatory region DN…	GO:0009893//positive regulation of metabolic process;GO:0007599//hemostasis;GO:0022607//cellular component assembly;GO:0044700//single organism signaling;GO:0065007//biological regulation;GO:0042592//homeostatic process;GO:0030182//neuron differentiation;GO:0030168//platelet activation;GO:0022008//neurogenesis;GO:0071840//cellular component organization or biogenesis;GO:0060249//anatomical struct…
XP_005888355	0	230.197	0.001	129.43	16.9818	2.15e-09	1.72e-07	up	LOC102276124	granulito [Danio rerio]	-	-	-	-	-	-	-
XP_005889830	0	1665.24	0.001	123.49	16.914	2.03e-20	3.22e-17	up	BTBD1	PREDICTED: BTB/POZ domain-containing protein 1 [Bos mutus]	-	-	-	-	GO:0032991//macromolecular complex	-	-
XM_005893313	0	313	0.001	113.123	16.7875	6.08e-09	4.32e-07	up	LOC102265410	PREDICTED: Bos mutus thioredoxin domain-containing protein 8 (LOC102265410), mRNA	-	-	-	-	-	-	-
XP_014333782	0	3428.14	0.001	112.567	16.7804	4.39e-23	1.87e-19	up	HSPA8	PREDICTED: LOW QUALITY PROTEIN: heat shock 70kDa protein 8 [Pantholops hodgsonii]	Cellular Processes;Organismal Systems;Environmental Information Processing;Genetic Information Processing	Signal transduction;Transport and catabolism;Endocrine system;Folding, sorting and degradation;Immune system;Transcription	ko04010//MAPK signaling pathway;ko04144//Endocytosis;ko04141//Protein processing in endoplasmic reticulum;ko03040//Spliceosome;ko04915//Estrogen signaling pathway;ko04612//Antigen processing and presentation	K03283	GO:0044421//extracellular region part;GO:1990904//ribonucleoprotein complex;GO:0044422//organelle part;GO:0043229//intracellular organelle;GO:0044464//cell part;GO:0030054//cell junction;GO:0016020//membrane;GO:0012505//endomembrane system;GO:0031974//membrane-enclosed lumen;GO:1903561//extracellular vesicle;GO:0043227//membrane-bounded organelle;GO:0005576//extracellular region;GO:0044424//intra…	GO:0032550//purine ribonucleoside binding;GO:0044877//macromolecular complex binding;GO:0003824//catalytic activity;GO:0016817//hydrolase activity, acting on acid anhydrides;GO:0001882//nucleoside binding;GO:0097159//organic cyclic compound binding;GO:0003823//antigen binding;GO:0005488//binding;GO:0036094//small molecule binding;GO:0023023//MHC protein complex binding;GO:0032403//protein complex…	GO:0019438//aromatic compound biosynthetic process;GO:0022411//cellular component disassembly;GO:0006914//autophagy;GO:0051179//localization;GO:0006810//transport;GO:0044699//single-organism process;GO:0018130//heterocycle biosynthetic process;GO:0009259//ribonucleotide metabolic process;GO:0044763//single-organism cellular process;GO:1901564//organonitrogen compound metabolic process;GO:0044281/…
XP_005891792	0	701.157	0.001	105.943	16.6929	2.21e-16	1.05e-13	up	CLDN11	PREDICTED: claudin-11 [Bos mutus]	Environmental Information Processing;Organismal Systems;Cellular Processes	Signaling molecules and interaction;Immune system;Cellular commiunity	ko04514//Cell adhesion molecules (CAMs);ko04530//Tight junction;ko04670//Leukocyte transendothelial migration	K06087	GO:0043226//organelle;GO:1903561//extracellular vesicle;GO:0043227//membrane-bounded organelle;GO:0031224//intrinsic component of membrane;GO:0044464//cell part;GO:0044425//membrane part;GO:0005623//cell;GO:0005576//extracellular region;GO:0031982//vesicle;GO:0043296//apical junction complex;GO:0030054//cell junction;GO:0044421//extracellular region part;GO:0016020//membrane;GO:0005911//cell-cell…	-	GO:0022610//biological adhesion;GO:0007272//ensheathment of neurons;GO:0007275//multicellular organism development;GO:0044707//single-multicellular organism process;GO:0007399//nervous system development;GO:0044699//single-organism process;GO:0009987//cellular process;GO:0019953//sexual reproduction;GO:0044702//single organism reproductive process;GO:0044703//multi-organism reproductive process;G…
XM_005889260	0	271.91	0.001	105.427	16.6859	9.72e-09	6.48e-07	up	PRM3	PREDICTED: Bos mutus protamine 3 (PRM3), mRNA	-	-	-	-	GO:0005623//cell;GO:0043229//intracellular organelle;GO:0044446//intracellular organelle part;GO:0043232//intracellular non-membrane-bounded organelle;GO:0044464//cell part;GO:0044424//intracellular part;GO:0000785//chromatin;GO:0043226//organelle;GO:0043228//non-membrane-bounded organelle;GO:0043231//intracellular membrane-bounded organelle;GO:0044427//chromosomal part;GO:0043227//membrane-bound…	GO:0097159//organic cyclic compound binding;GO:0003676//nucleic acid binding;GO:0005488//binding;GO:1901363//heterocyclic compound binding	GO:0016043//cellular component organization;GO:0006323//DNA packaging;GO:0032504//multicellular organism reproduction;GO:0051179//localization;GO:0048232//male gamete generation;GO:0007276//gamete generation;GO:0019953//sexual reproduction;GO:0009987//cellular process;GO:0006928//movement of cell or subcellular component;GO:0044767//single-organism developmental process;GO:0032501//multicellular …
XP_005900049	0	203.563	0.001	104.383	16.6715	3.24e-05	0.000763883	up	LOC102269175	PREDICTED: 60S ribosomal protein L35-like [Bos mutus]	Genetic Information Processing	Translation	ko03010//Ribosome	K02918	-	-	-
XP_005898933	0	1389.46	0.001	100.19	16.6124	2.71e-18	2.46e-15	up	CABYR	PREDICTED: AP2-associated protein kinase 1 isoform X1 [Bos mutus]	-	-	-	-	GO:0043226//organelle;GO:0044424//intracellular part;GO:0005929//cilium;GO:0042995//cell projection;GO:0044464//cell part;GO:0005623//cell;GO:0043229//intracellular organelle;GO:0097223//sperm part;GO:0005622//intracellular;GO:0036126//sperm flagellum;GO:0043227//membrane-bounded organelle;GO:0043231//intracellular membrane-bounded organelle;GO:0031514//motile cilium	GO:0046983//protein dimerization activity;GO:0005515//protein binding;GO:0005488//binding	-
XM_005905473	0	734.667	0.001	98.1533	16.5827	6.26e-13	1.3e-10	up	LOC102287467	PREDICTED: Bos mutus chromosome unknown open reading frame, human C12orf54 (LOC102287467), mRNA	-	-	-	-	-	-	-
XM_005909733	0	775.333	0.001	91.3167	16.4786	7.99e-13	1.6e-10	up	GTSF1L	PREDICTED: Bos mutus gametocyte specific factor 1-like (GTSF1L), transcript variant X1, mRNA	-	-	-	-	-	-	-
XP_005907894	0	154.65	0.001	90.61	16.4674	0.00228762	0.0249374	up	LOC102275763	PREDICTED: 60S acidic ribosomal protein P2-like [Bos mutus]	Genetic Information Processing	Translation	ko03010//Ribosome	K02943	-	-	-
XP_014338906	0	1655.71	0.001	88.1167	16.4271	1.78e-21	3.4e-18	up	SRPK1	PREDICTED: SRSF protein kinase 1 isoform X1 [Bison bison bison]	-	-	-	-	GO:0016020//membrane;GO:0043229//intracellular organelle;GO:0043226//organelle;GO:0044424//intracellular part;GO:0005622//intracellular;GO:0043231//intracellular membrane-bounded organelle;GO:0043227//membrane-bounded organelle;GO:0044464//cell part;GO:0005623//cell	GO:0001882//nucleoside binding;GO:0004672//protein kinase activity;GO:0043169//cation binding;GO:0097367//carbohydrate derivative binding;GO:0003723//RNA binding;GO:0036094//small molecule binding;GO:0016773//phosphotransferase activity, alcohol group as acceptor;GO:0005488//binding;GO:0003824//catalytic activity;GO:0003676//nucleic acid binding;GO:0043167//ion binding;GO:0016740//transferase act…	GO:0090304//nucleic acid metabolic process;GO:0044267//cellular protein metabolic process;GO:0050789//regulation of biological process;GO:0006807//nitrogen compound metabolic process;GO:0007165//signal transduction;GO:0016070//RNA metabolic process;GO:0010467//gene expression;GO:0044237//cellular metabolic process;GO:0016032//viral process;GO:0006396//RNA processing;GO:0006464//cellular protein m…
XP_005907960	0	2986.56	0.001	87.3233	16.4141	1.74e-29	4.82e-25	up	HTATSF1	PREDICTED: HIV Tat-specific factor 1 [Bos mutus]	-	-	-	-	-	-	-
XM_014482359	0	387.137	0.001	86.4867	16.4002	3.36e-10	3.37e-08	up	LOC106701465	PREDICTED: Bos mutus uncharacterized LOC106701465 (LOC106701465), transcript variant X1, mRNA	-	-	-	-	-	-	GO:0044702//single organism reproductive process;GO:0000003//reproduction;GO:0051704//multi-organism process;GO:0019953//sexual reproduction;GO:0035036//sperm-egg recognition;GO:0008037//cell recognition;GO:0044763//single-organism cellular process;GO:0044703//multi-organism reproductive process;GO:0022414//reproductive process;GO:0007338//single fertilization;GO:0009566//fertilization;GO:0009988…
XM_014483669	0	292.197	0.001	85.4633	16.383	2.14e-09	1.72e-07	up	LOC106701701	PREDICTED: Bos mutus uncharacterized LOC106701701 (LOC106701701), mRNA	-	-	-	-	-	-	-
XP_005911315	0	379.933	0.001	84.94	16.3742	0.000857885	0.0113761	up	LOC102279723	PREDICTED: heat shock protein HSP 90-alpha-like, partial [Bos mutus]	Environmental Information Processing;Genetic Information Processing;Organismal Systems	Folding, sorting and degradation;Endocrine system;Immune system;Signal transduction	ko04151//PI3K-Akt signaling pathway;ko04141//Protein processing in endoplasmic reticulum;ko04914//Progesterone-mediated oocyte maturation;ko04915//Estrogen signaling pathway;ko04612//Antigen processing and presentation;ko04621//NOD-like receptor signaling pathway	K04079	GO:0044464//cell part;GO:0005764//lysosome;GO:0000323//lytic vacuole;GO:1903561//extracellular vesicle;GO:0031410//cytoplasmic vesicle;GO:0005622//intracellular;GO:0031252//cell leading edge;GO:0097223//sperm part;GO:0044424//intracellular part;GO:0048770//pigment granule;GO:0097708//intracellular vesicle;GO:0031974//membrane-enclosed lumen;GO:0036126//sperm flagellum;GO:0070013//intracellular or…	GO:0051021//GDP-dissociation inhibitor binding;GO:0016772//transferase activity, transferring phosphorus-containing groups;GO:0005488//binding;GO:0019902//phosphatase binding;GO:0044822//poly(A) RNA binding;GO:0016817//hydrolase activity, acting on acid anhydrides;GO:1901265//nucleoside phosphate binding;GO:0016773//phosphotransferase activity, alcohol group as acceptor;GO:0019899//enzyme binding…	GO:0030098//lymphocyte differentiation;GO:0040011//locomotion;GO:0051234//establishment of localization;GO:0002429//immune response-activating cell surface receptor signaling pathway;GO:0002768//immune response-regulating cell surface receptor signaling pathway;GO:0032535//regulation of cellular component size;GO:0006941//striated muscle contraction;GO:0006996//organelle organization;GO:0044267//…
XM_005902666	0	1171.47	0.001	83.8733	16.3559	2.8e-18	2.47e-15	up	LOC102276581	PREDICTED: Bos mutus transmembrane protein 225 (LOC102276581), mRNA	-	-	-	-	GO:0099503//secretory vesicle;GO:0016020//membrane;GO:0030141//secretory granule;GO:0001669//acrosomal vesicle;GO:0005737//cytoplasm;GO:0043231//intracellular membrane-bounded organelle;GO:0031410//cytoplasmic vesicle;GO:0044444//cytoplasmic part;GO:0005623//cell;GO:0012505//endomembrane system;GO:0097708//intracellular vesicle;GO:0043229//intracellular organelle;GO:0043226//organelle;GO:0031224/…	-	GO:0010921//regulation of phosphatase activity;GO:0051174//regulation of phosphorus metabolic process;GO:0065009//regulation of molecular function;GO:0065007//biological regulation;GO:0019220//regulation of phosphate metabolic process;GO:0031323//regulation of cellular metabolic process;GO:0050789//regulation of biological process;GO:0019222//regulation of metabolic process;GO:0051336//regulation…
XM_005897838	0	628.927	0.001	81.85	16.3207	1.01e-13	2.52e-11	up	PPP1R2	PREDICTED: Bos mutus protein phosphatase 1, regulatory (inhibitor) subunit 2 (PPP1R2), transcript variant X3, mRNA	-	-	-	-	-	GO:0019208//phosphatase regulator activity;GO:0098772//molecular function regulator;GO:0019212//phosphatase inhibitor activity;GO:0030234//enzyme regulator activity;GO:0004857//enzyme inhibitor activity	GO:0044238//primary metabolic process;GO:0051174//regulation of phosphorus metabolic process;GO:0044262//cellular carbohydrate metabolic process;GO:0008152//metabolic process;GO:0065007//biological regulation;GO:0044092//negative regulation of molecular function;GO:0009987//cellular process;GO:0019222//regulation of metabolic process;GO:0050794//regulation of cellular process;GO:0010921//regulati…
XP_005887001	0	1743.76	0.001	81.4167	16.313	7.49e-18	5.34e-15	up	COIL	PREDICTED: coilin [Bos mutus]	-	-	-	-	GO:0005623//cell;GO:0044422//organelle part;GO:0044451//nucleoplasm part;GO:0031974//membrane-enclosed lumen;GO:0070013//intracellular organelle lumen;GO:0005622//intracellular;GO:0044428//nuclear part;GO:0005654//nucleoplasm;GO:0044424//intracellular part;GO:0043229//intracellular organelle;GO:0031981//nuclear lumen;GO:0016604//nuclear body;GO:0043226//organelle;GO:0043231//intracellular membran…	GO:0005515//protein binding;GO:0005488//binding	-
XM_005889439	0	403.333	0.001	80.5133	16.2969	8.65e-11	1e-08	up	LOC102270543	PREDICTED: Bos mutus histone H2A-Bbd type 1 (LOC102270543), mRNA	-	-	-	-	GO:0005622//intracellular;GO:0005623//cell;GO:0043226//organelle;GO:0043228//non-membrane-bounded organelle;GO:0043227//membrane-bounded organelle;GO:0044456//synapse part;GO:0045202//synapse;GO:0043232//intracellular non-membrane-bounded organelle;GO:0043231//intracellular membrane-bounded organelle;GO:0044464//cell part;GO:0044424//intracellular part;GO:0043229//intracellular organelle	GO:0005515//protein binding;GO:0031267//small GTPase binding;GO:0017016//Ras GTPase binding;GO:0046983//protein dimerization activity;GO:0051020//GTPase binding;GO:0005488//binding;GO:0097159//organic cyclic compound binding;GO:0019899//enzyme binding;GO:0003676//nucleic acid binding;GO:1901363//heterocyclic compound binding	GO:0044765//single-organism transport;GO:0009987//cellular process;GO:0016192//vesicle-mediated transport;GO:0051234//establishment of localization;GO:0032940//secretion by cell;GO:1902578//single-organism localization;GO:0006887//exocytosis;GO:0046903//secretion;GO:0051179//localization;GO:0006810//transport;GO:0044763//single-organism cellular process;GO:0044699//single-organism process
XM_005909874	0	1566.33	0.001	79.9567	16.2869	2.2e-17	1.41e-14	up	PPP1R32	PREDICTED: Bos mutus protein phosphatase 1, regulatory subunit 32 (PPP1R32), mRNA	-	-	-	-	-	GO:0005488//binding;GO:0005515//protein binding;GO:0019899//enzyme binding	-
XP_005899118	0	335.313	0.001	79.5667	16.2799	2.89e-08	1.64e-06	up	IGFBP7	PREDICTED: insulin-like growth factor-binding protein 7, partial [Bos mutus]	-	-	-	-	GO:0043227//membrane-bounded organelle;GO:0043230//extracellular organelle;GO:0043226//organelle;GO:0044421//extracellular region part;GO:0031982//vesicle;GO:0005576//extracellular region;GO:1903561//extracellular vesicle	GO:0019838//growth factor binding;GO:0005488//binding;GO:0005515//protein binding	GO:0008283//cell proliferation;GO:0022610//biological adhesion;GO:0044699//single-organism process
XM_005897530	0	2692.83	0.001	76.65	16.226	1.87e-22	5.53e-19	up	ADAM2	PREDICTED: Bos mutus ADAM metallopeptidase domain 2 (ADAM2), mRNA	-	-	-	-	GO:0031224//intrinsic component of membrane;GO:0016020//membrane;GO:0044464//cell part;GO:0044425//membrane part;GO:0005623//cell	GO:0046914//transition metal ion binding;GO:0046872//metal ion binding;GO:0070011//peptidase activity, acting on L-amino acid peptides;GO:0005488//binding;GO:0043169//cation binding;GO:0003824//catalytic activity;GO:0016787//hydrolase activity;GO:0008233//peptidase activity;GO:0043167//ion binding	GO:0071704//organic substance metabolic process;GO:0050896//response to stimulus;GO:0009628//response to abiotic stimulus;GO:0022610//biological adhesion;GO:0009416//response to light stimulus;GO:0007632//visual behavior;GO:0043170//macromolecule metabolic process;GO:0008152//metabolic process;GO:0044707//single-multicellular organism process;GO:0044238//primary metabolic process;GO:0044699//sing…
XM_005903410	0	1236.73	0.001	74.01	16.1754	5.45e-17	2.99e-14	up	ACR	PREDICTED: Bos mutus acrosin (ACR), mRNA	-	-	-	-	GO:0005623//cell;GO:0044464//cell part;GO:0043227//membrane-bounded organelle;GO:0016023//cytoplasmic, membrane-bounded vesicle;GO:0043231//intracellular membrane-bounded organelle;GO:0031988//membrane-bounded vesicle;GO:0032991//macromolecular complex;GO:0030141//secretory granule;GO:0044444//cytoplasmic part;GO:0031982//vesicle;GO:0044424//intracellular part;GO:0043229//intracellular organelle;…	GO:0016810//hydrolase activity, acting on carbon-nitrogen (but not peptide) bonds;GO:0036094//small molecule binding;GO:0048029//monosaccharide binding;GO:0003824//catalytic activity;GO:0005488//binding;GO:0030246//carbohydrate binding;GO:0016787//hydrolase activity;GO:0070011//peptidase activity, acting on L-amino acid peptides;GO:0004175//endopeptidase activity;GO:0008233//peptidase activity;GO…	GO:0019538//protein metabolic process;GO:1900373//positive regulation of purine nucleotide biosynthetic process;GO:0030802//regulation of cyclic nucleotide biosynthetic process;GO:0030817//regulation of cAMP biosynthetic process;GO:0030808//regulation of nucleotide biosynthetic process;GO:0031281//positive regulation of cyclase activity;GO:0019953//sexual reproduction;GO:0045981//positive regulat…
XM_005893325	0	1424	0.001	73.9133	16.1735	1.08e-15	4.25e-13	up	ACTL7A	PREDICTED: Bos mutus actin-like 7A (ACTL7A), mRNA	-	-	-	-	GO:0043228//non-membrane-bounded organelle;GO:0043226//organelle;GO:0044464//cell part;GO:0043232//intracellular non-membrane-bounded organelle;GO:0043227//membrane-bounded organelle;GO:0005623//cell;GO:0043231//intracellular membrane-bounded organelle;GO:0042995//cell projection;GO:0043229//intracellular organelle;GO:0005622//intracellular;GO:0044424//intracellular part;GO:0005929//cilium;GO:003…	-	-
XP_005898792	0	1556.58	0.001	70.89	16.1133	2.65e-23	1.34e-19	up	CCT3	T-complex protein 1 subunit gamma [Bos taurus]	-	-	-	-	GO:0043229//intracellular organelle;GO:0043226//organelle;GO:0031982//vesicle;GO:0005856//cytoskeleton;GO:0015630//microtubule cytoskeleton;GO:0032991//macromolecular complex;GO:0005623//cell;GO:1903561//extracellular vesicle;GO:0044464//cell part;GO:0044424//intracellular part;GO:0043227//membrane-bounded organelle;GO:0043232//intracellular non-membrane-bounded organelle;GO:0016020//membrane;GO:…	GO:0032550//purine ribonucleoside binding;GO:0001883//purine nucleoside binding;GO:0001882//nucleoside binding;GO:0005515//protein binding;GO:1901363//heterocyclic compound binding;GO:0097367//carbohydrate derivative binding;GO:0032549//ribonucleoside binding;GO:0097159//organic cyclic compound binding;GO:0036094//small molecule binding;GO:0003676//nucleic acid binding;GO:0003723//RNA binding;GO:…	GO:0006461//protein complex assembly;GO:0019953//sexual reproduction;GO:0007338//single fertilization;GO:0051704//multi-organism process;GO:0035036//sperm-egg recognition;GO:0044703//multi-organism reproductive process;GO:0071822//protein complex subunit organization;GO:0022414//reproductive process;GO:0043933//macromolecular complex subunit organization;GO:0044702//single organism reproductive p…
XP_005888761	0	1767.07	0.001	70.13	16.0977	1.39e-06	5.02e-05	up	PSAP	PREDICTED: proactivator polypeptide isoform X2 [Bos mutus]	Cellular Processes	Transport and catabolism	ko04142//Lysosome	K12382	-	-	-
XP_014335249	0	735.237	0.001	68.4967	16.0637	3.86e-16	1.67e-13	up	ZPBP	PREDICTED: zona pellucida-binding protein 1 [Bos mutus]	-	-	-	-	GO:0044444//cytoplasmic part;GO:0031982//vesicle;GO:0044424//intracellular part;GO:0031410//cytoplasmic vesicle;GO:0005622//intracellular;GO:0012505//endomembrane system;GO:0044464//cell part;GO:0043229//intracellular organelle;GO:0097708//intracellular vesicle;GO:0005623//cell;GO:0043227//membrane-bounded organelle;GO:0030141//secretory granule;GO:0031224//intrinsic component of membrane;GO:0016…	-	GO:0022414//reproductive process;GO:0008037//cell recognition;GO:0044702//single organism reproductive process;GO:0009566//fertilization;GO:0044763//single-organism cellular process;GO:0019953//sexual reproduction;GO:0007338//single fertilization;GO:0044703//multi-organism reproductive process;GO:0044699//single-organism process;GO:0035036//sperm-egg recognition;GO:0009987//cellular process;GO:00…
XM_005904011	0	1496.15	0.001	68.33	16.0602	4.65e-16	1.98e-13	up	BAG5	PREDICTED: Bos mutus BCL2-associated athanogene 5 (BAG5), transcript variant X1, mRNA	-	-	-	-	GO:0005737//cytoplasm;GO:0043226//organelle;GO:0043229//intracellular organelle;GO:0043227//membrane-bounded organelle;GO:0005622//intracellular;GO:0043231//intracellular membrane-bounded organelle;GO:0005623//cell;GO:0044464//cell part;GO:0044424//intracellular part;GO:0044444//cytoplasmic part	GO:0005488//binding;GO:0000166//nucleotide binding;GO:0019900//kinase binding;GO:0044389//ubiquitin-like protein ligase binding;GO:0017076//purine nucleotide binding;GO:1901363//heterocyclic compound binding;GO:0097159//organic cyclic compound binding;GO:0019899//enzyme binding;GO:0030554//adenyl nucleotide binding;GO:0036094//small molecule binding;GO:1901265//nucleoside phosphate binding;GO:000…	GO:0045595//regulation of cell differentiation;GO:0006457//protein folding;GO:0065007//biological regulation;GO:0006915//apoptotic process;GO:1903321//negative regulation of protein modification by small protein conjugation or removal;GO:0070887//cellular response to chemical stimulus;GO:0071840//cellular component organization or biogenesis;GO:0060284//regulation of cell development;GO:0051716//…
XP_005907977	0	826.823	0.001	68.1967	16.0574	2.21e-20	3.41e-17	up	SARAF	PREDICTED: store-operated calcium entry-associated regulatory factor [Bos mutus]	-	-	-	-	GO:0005623//cell;GO:0044424//intracellular part;GO:0044425//membrane part;GO:0044422//organelle part;GO:0005789//endoplasmic reticulum membrane;GO:0005783//endoplasmic reticulum;GO:0012505//endomembrane system;GO:0042175//nuclear outer membrane-endoplasmic reticulum membrane network;GO:0005737//cytoplasm;GO:0005622//intracellular;GO:0044432//endoplasmic reticulum part;GO:0043229//intracellular or…	-	GO:0006810//transport;GO:0051179//localization;GO:0070838//divalent metal ion transport;GO:0006811//ion transport;GO:0030001//metal ion transport;GO:0006816//calcium ion transport;GO:0002115//store-operated calcium entry;GO:0051234//establishment of localization;GO:0006812//cation transport;GO:0072511//divalent inorganic cation transport
XM_014477796	0	761.28	0.001	67.9333	16.0518	7.7e-16	3.07e-13	up	HRASLS5	PREDICTED: Bos mutus HRAS-like suppressor family, member 5 (HRASLS5), mRNA	-	-	-	-	-	-	GO:0006807//nitrogen compound metabolic process;GO:0008152//metabolic process;GO:0009987//cellular process;GO:0044237//cellular metabolic process;GO:0043603//cellular amide metabolic process;GO:0034641//cellular nitrogen compound metabolic process
XM_005895017	0	547.87	0.001	67.9067	16.0513	1.27e-11	1.92e-09	up	HMGB4	PREDICTED: Bos mutus high mobility group box 4 (HMGB4), mRNA	-	-	-	-	GO:0005622//intracellular;GO:0005623//cell;GO:0044464//cell part;GO:0043226//organelle;GO:0044424//intracellular part;GO:0043228//non-membrane-bounded organelle;GO:0043232//intracellular non-membrane-bounded organelle;GO:0043231//intracellular membrane-bounded organelle;GO:0043227//membrane-bounded organelle;GO:0043229//intracellular organelle	-	-
XP_005889268	0	740.02	0.001	66.1	16.0124	9.08e-15	2.91e-12	up	CCNG1	PREDICTED: cyclin-G1 [Bos mutus]	Cellular Processes	Cell growth and death	ko04115//p53 signaling pathway	K10145	GO:0031981//nuclear lumen;GO:0043227//membrane-bounded organelle;GO:0044464//cell part;GO:0005634//nucleus;GO:0043231//intracellular membrane-bounded organelle;GO:0044422//organelle part;GO:0005622//intracellular;GO:0070013//intracellular organelle lumen;GO:0043229//intracellular organelle;GO:0044424//intracellular part;GO:0044446//intracellular organelle part;GO:0043233//organelle lumen;GO:00319…	GO:0005488//binding	GO:0032268//regulation of cellular protein metabolic process;GO:0065007//biological regulation;GO:0043549//regulation of kinase activity;GO:0065009//regulation of molecular function;GO:0060255//regulation of macromolecule metabolic process;GO:0050794//regulation of cellular process;GO:0051338//regulation of transferase activity;GO:0050790//regulation of catalytic activity;GO:0001932//regulation o…
XP_005901545	0	3699.54	0.001	65.6667	16.0029	8.14e-30	4.51e-25	up	HDLBP	PREDICTED: vigilin isoform X1 [Bos mutus]	-	-	-	-	GO:0044464//cell part;GO:0044424//intracellular part;GO:0005623//cell;GO:0005622//intracellular	GO:0003676//nucleic acid binding;GO:0097159//organic cyclic compound binding;GO:1901363//heterocyclic compound binding;GO:0005488//binding	-
XM_014481794	0	1117.61	0.001	64.7867	15.9834	2.49e-07	1.11e-05	up	LOC102277529	PREDICTED: Bos mutus neuferricin (LOC102277529), transcript variant X2, mRNA	-	-	-	-	-	-	-
XM_005899474	0	814.333	0.001	64.54	15.9779	1.11e-13	2.71e-11	up	CAPZA3	PREDICTED: Bos mutus capping protein (actin filament) muscle Z-line, alpha 3 (CAPZA3), mRNA	Cellular Processes	Transport and catabolism	ko04144//Endocytosis	K10364	GO:0043229//intracellular organelle;GO:0043232//intracellular non-membrane-bounded organelle;GO:0043226//organelle;GO:0005856//cytoskeleton;GO:0015629//actin cytoskeleton;GO:0005623//cell;GO:0005622//intracellular;GO:0043227//membrane-bounded organelle;GO:0043228//non-membrane-bounded organelle;GO:0044424//intracellular part;GO:0043231//intracellular membrane-bounded organelle;GO:0044464//cell pa…	GO:0008092//cytoskeletal protein binding;GO:0005488//binding;GO:0005515//protein binding	GO:0032504//multicellular organism reproduction;GO:0048609//multicellular organismal reproductive process;GO:0010639//negative regulation of organelle organization;GO:0032501//multicellular organismal process;GO:0016043//cellular component organization;GO:0032970//regulation of actin filament-based process;GO:0030834//regulation of actin filament depolymerization;GO:0019953//sexual reproduction;G…
XP_005908509	0	386.597	0.001	63.9167	15.9639	2.9e-10	2.95e-08	up	AK1	PREDICTED: adenylate kinase isoenzyme 1 isoform X1 [Bos mutus]	Metabolism	Nucleotide metabolism	ko00230//Purine metabolism	K00939	GO:0043226//organelle;GO:0042995//cell projection;GO:0031982//vesicle;GO:0005623//cell;GO:0005929//cilium;GO:0043230//extracellular organelle;GO:0044421//extracellular region part;GO:0097223//sperm part;GO:0044424//intracellular part;GO:0005622//intracellular;GO:0043227//membrane-bounded organelle;GO:0016020//membrane;GO:0031514//motile cilium;GO:0005576//extracellular region;GO:0044464//cell par…	GO:0032549//ribonucleoside binding;GO:0003824//catalytic activity;GO:0016776//phosphotransferase activity, phosphate group as acceptor;GO:0032550//purine ribonucleoside binding;GO:1901363//heterocyclic compound binding;GO:0036094//small molecule binding;GO:0001882//nucleoside binding;GO:0097367//carbohydrate derivative binding;GO:0097159//organic cyclic compound binding;GO:0005488//binding;GO:001…	GO:0034654//nucleobase-containing compound biosynthetic process;GO:1901360//organic cyclic compound metabolic process;GO:0044699//single-organism process;GO:0019637//organophosphate metabolic process;GO:0009132//nucleoside diphosphate metabolic process;GO:0022402//cell cycle process;GO:0009152//purine ribonucleotide biosynthetic process;GO:0009058//biosynthetic process;GO:0006139//nucleobase-cont…
XP_005899141	0	1981.27	0.001	62.4867	15.9313	1.39e-19	1.67e-16	up	HSP90B1	endoplasmin precursor [Bos taurus]	Organismal Systems;Environmental Information Processing;Genetic Information Processing	Signal transduction;Folding, sorting and degradation;Endocrine system;Immune system	ko04151//PI3K-Akt signaling pathway;ko04141//Protein processing in endoplasmic reticulum;ko04915//Estrogen signaling pathway;ko04918//Thyroid hormone synthesis;ko04621//NOD-like receptor signaling pathway	K09487	GO:0012505//endomembrane system;GO:0070161//anchoring junction;GO:0048770//pigment granule;GO:0031982//vesicle;GO:0044464//cell part;GO:0044422//organelle part;GO:0032991//macromolecular complex;GO:0044444//cytoplasmic part;GO:0043231//intracellular membrane-bounded organelle;GO:0005912//adherens junction;GO:0016023//cytoplasmic, membrane-bounded vesicle;GO:0043227//membrane-bounded organelle;GO:…	GO:0097159//organic cyclic compound binding;GO:0005515//protein binding;GO:0036094//small molecule binding;GO:0003676//nucleic acid binding;GO:0005102//receptor binding;GO:0005488//binding;GO:1901363//heterocyclic compound binding;GO:0019902//phosphatase binding;GO:0032550//purine ribonucleoside binding;GO:0001883//purine nucleoside binding;GO:0070325//lipoprotein particle receptor binding;GO:003…	GO:0071840//cellular component organization or biogenesis;GO:0044238//primary metabolic process;GO:0032527//protein exit from endoplasmic reticulum;GO:0009719//response to endogenous stimulus;GO:0044763//single-organism cellular process;GO:0050794//regulation of cellular process;GO:0065007//biological regulation;GO:0033036//macromolecule localization;GO:0045184//establishment of protein localizat…
XP_005901285	0	478.273	0.001	60.8967	15.8941	3.05e-13	6.82e-11	up	FAM216A	PREDICTED: protein FAM216A isoform X1 [Bos mutus]	-	-	-	-	-	-	-
XM_014478435	0	420	0.001	60.7133	15.8897	3.39e-10	3.39e-08	up	LOC106700866	PREDICTED: Bos mutus uncharacterized LOC106700866 (LOC106700866), mRNA	-	-	-	-	-	-	-
XM_005906457	0	1206.78	0.001	58.22	15.8292	2.06e-18	1.9e-15	up	CREM	PREDICTED: Bos mutus cAMP responsive element modulator (CREM), transcript variant X5, mRNA	Organismal Systems	Circulatory system	ko04261//Adrenergic signaling in cardiomyocytes	K09052	GO:0043234//protein complex;GO:0043227//membrane-bounded organelle;GO:0044464//cell part;GO:0005623//cell;GO:0044424//intracellular part;GO:0043226//organelle;GO:0043229//intracellular organelle;GO:0043231//intracellular membrane-bounded organelle;GO:0005622//intracellular;GO:0032991//macromolecular complex	GO:1901363//heterocyclic compound binding;GO:0000975//regulatory region DNA binding;GO:0044212//transcription regulatory region DNA binding;GO:0003677//DNA binding;GO:0003690//double-stranded DNA binding;GO:0001067//regulatory region nucleic acid binding;GO:0005488//binding;GO:1990837//sequence-specific double-stranded DNA binding;GO:0000976//transcription regulatory region sequence-specific DNA …	GO:0009058//biosynthetic process;GO:0007623//circadian rhythm;GO:0006351//transcription, DNA-templated;GO:0034641//cellular nitrogen compound metabolic process;GO:0018130//heterocycle biosynthetic process;GO:0048232//male gamete generation;GO:1903509//liposaccharide metabolic process;GO:0006725//cellular aromatic compound metabolic process;GO:0006643//membrane lipid metabolic process;GO:0034654//…
XM_005891803	0	733.53	0.001	57.5	15.8113	5.08e-13	1.07e-10	up	PSMA6	PREDICTED: Bos mutus proteasome subunit alpha 6 (PSMA6), transcript variant X3, mRNA	Genetic Information Processing	Folding, sorting and degradation	ko03050//Proteasome	K02730	GO:0043231//intracellular membrane-bounded organelle;GO:0044464//cell part;GO:0031981//nuclear lumen;GO:0043227//membrane-bounded organelle;GO:0005576//extracellular region;GO:0030016//myofibril;GO:0043232//intracellular non-membrane-bounded organelle;GO:1990904//ribonucleoprotein complex;GO:0036464//cytoplasmic ribonucleoprotein granule;GO:0043233//organelle lumen;GO:0031974//membrane-enclosed l…	GO:0003824//catalytic activity;GO:0008134//transcription factor binding;GO:0004175//endopeptidase activity;GO:0097159//organic cyclic compound binding;GO:0005488//binding;GO:0008233//peptidase activity;GO:0003676//nucleic acid binding;GO:1901363//heterocyclic compound binding;GO:0070011//peptidase activity, acting on L-amino acid peptides;GO:0016787//hydrolase activity;GO:0005515//protein binding	GO:0010556//regulation of macromolecule biosynthetic process;GO:0010468//regulation of gene expression;GO:0043632//modification-dependent macromolecule catabolic process;GO:0060537//muscle tissue development;GO:0044260//cellular macromolecule metabolic process;GO:0048518//positive regulation of biological process;GO:0019222//regulation of metabolic process;GO:2001141//regulation of RNA biosynthet…
XP_005891444	0	1946.47	0.001	57.3133	15.8066	4.59e-25	4.24e-21	up	BRD2	PREDICTED: bromodomain-containing protein 2 isoform X1 [Bos mutus]	-	-	-	-	GO:0044424//intracellular part;GO:0044464//cell part;GO:0043227//membrane-bounded organelle;GO:0005623//cell;GO:0005622//intracellular;GO:0043229//intracellular organelle;GO:0043231//intracellular membrane-bounded organelle;GO:0043226//organelle	GO:0005515//protein binding;GO:0044877//macromolecular complex binding;GO:0005488//binding;GO:0042393//histone binding	GO:0043933//macromolecular complex subunit organization;GO:0071824//protein-DNA complex subunit organization;GO:0044249//cellular biosynthetic process;GO:0071822//protein complex subunit organization;GO:0018130//heterocycle biosynthetic process;GO:0034641//cellular nitrogen compound metabolic process;GO:0006351//transcription, DNA-templated;GO:1901360//organic cyclic compound metabolic process;GO…
XP_005903119	0	1268.79	0.001	56.6933	15.7909	3.31e-22	8.36e-19	up	UBQLN1	PREDICTED: ubiquilin-1 isoform X2 [Bos mutus]	Genetic Information Processing	Folding, sorting and degradation	ko04141//Protein processing in endoplasmic reticulum	K04523	GO:0005622//intracellular;GO:0005737//cytoplasm;GO:0016020//membrane;GO:0043231//intracellular membrane-bounded organelle;GO:0032991//macromolecular complex;GO:0043227//membrane-bounded organelle;GO:0005773//vacuole;GO:0044464//cell part;GO:0044424//intracellular part;GO:0016234//inclusion body;GO:0005623//cell;GO:0043226//organelle;GO:0043229//intracellular organelle;GO:0044444//cytoplasmic part	GO:0005515//protein binding;GO:0032182//ubiquitin-like protein binding;GO:0019899//enzyme binding;GO:0005488//binding;GO:0043130//ubiquitin binding	GO:0050789//regulation of biological process;GO:0043412//macromolecule modification;GO:0030163//protein catabolic process;GO:0044700//single organism signaling;GO:0044248//cellular catabolic process;GO:0035556//intracellular signal transduction;GO:0051129//negative regulation of cellular component organization;GO:0006979//response to oxidative stress;GO:0010506//regulation of autophagy;GO:0001666…
XP_005908844	0	652.383	0.001	56.4433	15.7845	2.61e-16	1.2e-13	up	PPP2R4	serine/threonine-protein phosphatase 2A activator [Bos taurus]	-	-	-	-	-	-	-
XP_005899669	0	2014.55	0.001	56.1267	15.7764	2.49e-25	2.76e-21	up	MARCH6	PREDICTED: E3 ubiquitin-protein ligase MARCH6 [Bison bison bison]	Genetic Information Processing	Folding, sorting and degradation	ko04141//Protein processing in endoplasmic reticulum	K10661	GO:0044424//intracellular part;GO:0044464//cell part;GO:0005622//intracellular;GO:0012505//endomembrane system;GO:0043229//intracellular organelle;GO:0042175//nuclear outer membrane-endoplasmic reticulum membrane network;GO:0044425//membrane part;GO:0043231//intracellular membrane-bounded organelle;GO:0044432//endoplasmic reticulum part;GO:0043227//membrane-bounded organelle;GO:0044422//organelle…	GO:0043167//ion binding;GO:0046914//transition metal ion binding;GO:0005515//protein binding;GO:0044390//ubiquitin-like protein conjugating enzyme binding;GO:0005488//binding;GO:0019899//enzyme binding;GO:0043169//cation binding;GO:0002020//protease binding;GO:0046872//metal ion binding	GO:0032446//protein modification by small protein conjugation;GO:0036211//protein modification process;GO:0009056//catabolic process;GO:0043412//macromolecule modification;GO:0044267//cellular protein metabolic process;GO:0071704//organic substance metabolic process;GO:0070647//protein modification by small protein conjugation or removal;GO:0044257//cellular protein catabolic process;GO:0044260//…
XP_005900928	0	2032.35	0.001	55.6567	15.7643	8.43e-15	2.73e-12	up	LOC102279096	chromosome 14 open reading frame 37 ortholog precursor [Sus scrofa]	-	-	-	-	-	-	-
XM_005908993	0	730.08	0.001	55.31	15.7553	6.79e-17	3.66e-14	up	LYPD4	PREDICTED: Bos mutus LY6/PLAUR domain containing 4 (LYPD4), mRNA	-	-	-	-	GO:0044425//membrane part;GO:0016020//membrane;GO:0031224//intrinsic component of membrane	-	-
XM_014476462	0	826.097	0.001	55.17	15.7516	1.06e-13	2.6e-11	up	GSG1	PREDICTED: Bos mutus germ cell associated 1 (GSG1), transcript variant X2, mRNA	-	-	-	-	GO:0043227//membrane-bounded organelle;GO:0043226//organelle;GO:0043229//intracellular organelle;GO:0005623//cell;GO:0031224//intrinsic component of membrane;GO:0044425//membrane part;GO:0043231//intracellular membrane-bounded organelle;GO:0005622//intracellular;GO:0044424//intracellular part;GO:0044464//cell part;GO:0016020//membrane	GO:0005488//binding;GO:0019899//enzyme binding;GO:0005515//protein binding	-
XM_005896918	0	581.377	0.001	54.82	15.7424	8.06e-11	9.44e-09	up	BPIFA3	PREDICTED: Bos mutus BPI fold containing family A, member 3 (BPIFA3), mRNA	-	-	-	-	-	-	-
XP_005897522	0	1096.52	0.001	54.56	15.7356	2.8e-20	4.19e-17	up	GPBP1	PREDICTED: vasculin isoform X1 [Bos mutus]	-	-	-	-	-	-	-
XM_005899226	0	1425.06	0.001	53.7333	15.7135	6.85e-16	2.81e-13	up	KLHL10	PREDICTED: Bos mutus kelch-like family member 10 (KLHL10), transcript variant X1, mRNA	-	-	-	-	-	-	-
XM_014480115	0	1669	0.001	53.51	15.7075	2.07e-16	9.89e-14	up	ACSBG2	PREDICTED: Bos mutus acyl-CoA synthetase bubblegum family member 2 (ACSBG2), mRNA	Organismal Systems;Metabolism	Global and Overview;Lipid metabolism;Endocrine system	ko04920//Adipocytokine signaling pathway;ko03320//PPAR signaling pathway;ko01212//Fatty acid metabolism;ko00071//Fatty acid degradation;ko00061//Fatty acid biosynthesis	K15013	GO:0043226//organelle;GO:0031224//intrinsic component of membrane;GO:0043227//membrane-bounded organelle;GO:0044425//membrane part;GO:0005737//cytoplasm;GO:0044444//cytoplasmic part;GO:0005622//intracellular;GO:0043229//intracellular organelle;GO:0016020//membrane;GO:0044464//cell part;GO:0005623//cell;GO:0043231//intracellular membrane-bounded organelle;GO:0044424//intracellular part	GO:0016788//hydrolase activity, acting on ester bonds;GO:0016787//hydrolase activity;GO:0016877//ligase activity, forming carbon-sulfur bonds;GO:0003824//catalytic activity;GO:0016289//CoA hydrolase activity;GO:0015645//fatty acid ligase activity;GO:0016790//thiolester hydrolase activity;GO:0016874//ligase activity	GO:0032787//monocarboxylic acid metabolic process;GO:0006082//organic acid metabolic process;GO:0009987//cellular process;GO:0071704//organic substance metabolic process;GO:0019752//carboxylic acid metabolic process;GO:0044710//single-organism metabolic process;GO:0044237//cellular metabolic process;GO:0044281//small molecule metabolic process;GO:0008152//metabolic process;GO:0044763//single-orga…
XP_005888380	0	1022.48	0.001	53.2633	15.7009	4.6e-17	2.58e-14	up	FZR1	fizzy-related protein homolog [Bos taurus]	Genetic Information Processing;Organismal Systems;Cellular Processes	Endocrine system;Folding, sorting and degradation;Cell growth and death	ko04120//Ubiquitin mediated proteolysis;ko04110//Cell cycle;ko04914//Progesterone-mediated oocyte maturation	K03364	GO:0005623//cell;GO:0044446//intracellular organelle part;GO:0005622//intracellular;GO:0031967//organelle envelope;GO:0000152//nuclear ubiquitin ligase complex;GO:0005634//nucleus;GO:0012505//endomembrane system;GO:1902494//catalytic complex;GO:0000151//ubiquitin ligase complex;GO:0043231//intracellular membrane-bounded organelle;GO:0043229//intracellular organelle;GO:0043227//membrane-bounded or…	GO:0055103//ligase regulator activity;GO:0055106//ubiquitin-protein transferase regulator activity;GO:0005515//protein binding;GO:0032403//protein complex binding;GO:0005488//binding;GO:0044877//macromolecular complex binding;GO:0098772//molecular function regulator;GO:0030234//enzyme regulator activity	GO:0022414//reproductive process;GO:0065009//regulation of molecular function;GO:0044767//single-organism developmental process;GO:0044238//primary metabolic process;GO:0032501//multicellular organismal process;GO:0051716//cellular response to stimulus;GO:0000280//nuclear division;GO:0009057//macromolecule catabolic process;GO:0044248//cellular catabolic process;GO:0071840//cellular component org…
Unigene046318	0	8.66667	0.001	52.7067	15.6857	0.0105816	0.0804348	no	-	-	-	-	-	-	-	-	-
XM_014479544	0	1894.21	0.001	52.0333	15.6671	2.38e-21	4.4e-18	up	CAPN11	PREDICTED: Bos mutus calpain 11 (CAPN11), mRNA	-	-	-	-	GO:0044464//cell part;GO:0005623//cell	GO:0005488//binding;GO:0046872//metal ion binding;GO:0008233//peptidase activity;GO:0004197//cysteine-type endopeptidase activity;GO:0016787//hydrolase activity;GO:0043169//cation binding;GO:0003824//catalytic activity;GO:0008234//cysteine-type peptidase activity;GO:0043167//ion binding;GO:0070011//peptidase activity, acting on L-amino acid peptides;GO:0004175//endopeptidase activity	GO:0019538//protein metabolic process;GO:0008152//metabolic process;GO:0071704//organic substance metabolic process;GO:0043170//macromolecule metabolic process;GO:0044238//primary metabolic process
XP_005890388	0	226.33	0.001	51.8133	15.661	1.21e-08	7.83e-07	up	LOC102265389	PREDICTED: spermatid-specific linker histone H1-like protein-like [Bos mutus]	-	-	-	-	GO:0044464//cell part;GO:0005623//cell;GO:0043231//intracellular membrane-bounded organelle;GO:0005622//intracellular;GO:0043227//membrane-bounded organelle;GO:0043226//organelle;GO:0044424//intracellular part;GO:0043229//intracellular organelle	GO:0097159//organic cyclic compound binding;GO:1901363//heterocyclic compound binding;GO:0005488//binding;GO:0003676//nucleic acid binding	GO:0034728//nucleosome organization;GO:0006325//chromatin organization;GO:0071824//protein-DNA complex subunit organization;GO:0016043//cellular component organization;GO:0071840//cellular component organization or biogenesis;GO:0043933//macromolecular complex subunit organization;GO:0009987//cellular process;GO:0071822//protein complex subunit organization
XP_005886872	0	415.057	0.001	50.8933	15.6352	1.58e-10	1.71e-08	up	RNF151	PREDICTED: RING finger protein 151 [Bubalus bubalis]	-	-	-	-	GO:0043231//intracellular membrane-bounded organelle;GO:0005623//cell;GO:0043226//organelle;GO:0044424//intracellular part;GO:0043229//intracellular organelle;GO:0005622//intracellular;GO:0043227//membrane-bounded organelle;GO:0044464//cell part	GO:0043167//ion binding;GO:0046914//transition metal ion binding;GO:0043169//cation binding;GO:0005488//binding;GO:0046872//metal ion binding	GO:0043170//macromolecule metabolic process;GO:0070647//protein modification by small protein conjugation or removal;GO:0043412//macromolecule modification;GO:0032446//protein modification by small protein conjugation;GO:0044238//primary metabolic process;GO:0044260//cellular macromolecule metabolic process;GO:0071704//organic substance metabolic process;GO:0006464//cellular protein modification …
XP_005901648	0	376.237	0.001	50.5467	15.6253	1.62e-11	2.37e-09	up	LOC102276933	glutathione S-transferase, theta 4 [Bos taurus]	-	-	-	-	-	-	-
XP_005901507	0	1350.96	0.001	49.3267	15.5901	2.81e-19	3e-16	up	SRPK2	PREDICTED: SRSF protein kinase 2 isoform X2 [Bos mutus]	-	-	-	-	GO:0043233//organelle lumen;GO:0044464//cell part;GO:0005623//cell;GO:0031981//nuclear lumen;GO:0031974//membrane-enclosed lumen;GO:0044422//organelle part;GO:0044428//nuclear part;GO:0043229//intracellular organelle;GO:0005622//intracellular;GO:0043227//membrane-bounded organelle;GO:0043231//intracellular membrane-bounded organelle;GO:0070013//intracellular organelle lumen;GO:0044446//intracellu…	GO:0016773//phosphotransferase activity, alcohol group as acceptor;GO:0003723//RNA binding;GO:0097159//organic cyclic compound binding;GO:0043169//cation binding;GO:0016772//transferase activity, transferring phosphorus-containing groups;GO:0001882//nucleoside binding;GO:0003824//catalytic activity;GO:0046872//metal ion binding;GO:0016301//kinase activity;GO:0097367//carbohydrate derivative bindi…	GO:0051704//multi-organism process;GO:0044700//single organism signaling;GO:0006396//RNA processing;GO:0006725//cellular aromatic compound metabolic process;GO:0007154//cell communication;GO:0000398//mRNA splicing, via spliceosome;GO:0044267//cellular protein metabolic process;GO:0008380//RNA splicing;GO:0044238//primary metabolic process;GO:0044699//single-organism process;GO:0016032//viral proc…
XM_005905015	0	363.033	0.001	49.16	15.5852	2.75e-10	2.81e-08	up	IZUMO2	PREDICTED: Bos mutus IZUMO family member 2 (IZUMO2), mRNA	-	-	-	-	-	-	-
XP_005908063	0	713.367	0.001	49.1067	15.5836	5.95e-18	4.52e-15	up	PRPSAP1	PREDICTED: phosphoribosyl pyrophosphate synthase-associated protein 1 [Bos taurus]	-	-	-	-	-	GO:0016778//diphosphotransferase activity;GO:0016740//transferase activity;GO:0003824//catalytic activity;GO:0016772//transferase activity, transferring phosphorus-containing groups	GO:0044238//primary metabolic process;GO:0006753//nucleoside phosphate metabolic process;GO:0006793//phosphorus metabolic process;GO:0034641//cellular nitrogen compound metabolic process;GO:0071704//organic substance metabolic process;GO:0046483//heterocycle metabolic process;GO:0006139//nucleobase-containing compound metabolic process;GO:0044699//single-organism process;GO:0019637//organophospha…
XP_005895803	0	1075.8	0.001	48.85	15.5761	1.67e-20	2.8e-17	up	PPM1G	protein phosphatase 1G [Bos taurus]	-	-	-	-	GO:0044464//cell part;GO:0005623//cell;GO:0043229//intracellular organelle;GO:0043226//organelle;GO:0044422//organelle part;GO:0031974//membrane-enclosed lumen;GO:0044446//intracellular organelle part;GO:0043227//membrane-bounded organelle;GO:0044428//nuclear part;GO:0031981//nuclear lumen;GO:0043231//intracellular membrane-bounded organelle;GO:0043233//organelle lumen;GO:0005622//intracellular;G…	GO:0016791//phosphatase activity;GO:0042578//phosphoric ester hydrolase activity;GO:0043169//cation binding;GO:0003824//catalytic activity;GO:0016787//hydrolase activity;GO:0005488//binding;GO:0004721//phosphoprotein phosphatase activity;GO:0016788//hydrolase activity, acting on ester bonds;GO:0043167//ion binding	GO:0044238//primary metabolic process;GO:0044260//cellular macromolecule metabolic process;GO:0006470//protein dephosphorylation;GO:0006464//cellular protein modification process;GO:0071704//organic substance metabolic process;GO:0016311//dephosphorylation;GO:0043412//macromolecule modification;GO:0044237//cellular metabolic process;GO:0022402//cell cycle process;GO:0036211//protein modification …
XP_014332234	0	1098.77	0.001	46.9567	15.519	1.33e-22	4.34e-19	up	PABPC1	PREDICTED: polyadenylate-binding protein 1 [Felis catus]	Genetic Information Processing	Folding, sorting and degradation;Translation	ko03013//RNA transport;ko03015//mRNA surveillance pathway;ko03018//RNA degradation	K13126	GO:1990904//ribonucleoprotein complex;GO:0030054//cell junction;GO:0043227//membrane-bounded organelle;GO:0044444//cytoplasmic part;GO:0043231//intracellular membrane-bounded organelle;GO:0044424//intracellular part;GO:0030055//cell-substrate junction;GO:0044422//organelle part;GO:0044464//cell part;GO:0005576//extracellular region;GO:0031982//vesicle;GO:0036464//cytoplasmic ribonucleoprotein gra…	GO:0008187//poly-pyrimidine tract binding;GO:0005515//protein binding;GO:0003727//single-stranded RNA binding;GO:1901363//heterocyclic compound binding;GO:0097159//organic cyclic compound binding;GO:0070717//poly-purine tract binding;GO:0005488//binding;GO:0003723//RNA binding;GO:0003676//nucleic acid binding	GO:0019219//regulation of nucleobase-containing compound metabolic process;GO:0006402//mRNA catabolic process;GO:0016070//RNA metabolic process;GO:0034655//nucleobase-containing compound catabolic process;GO:0000288//nuclear-transcribed mRNA catabolic process, deadenylation-dependent decay;GO:0051252//regulation of RNA metabolic process;GO:0031330//negative regulation of cellular catabolic proces…
XP_014332236	0	1098.77	0.001	46.9567	15.519	1.33e-22	4.34e-19	up	PABPC1	PREDICTED: polyadenylate-binding protein 1 [Felis catus]	Genetic Information Processing	Translation;Folding, sorting and degradation	ko03013//RNA transport;ko03015//mRNA surveillance pathway;ko03018//RNA degradation	K13126	GO:0005634//nucleus;GO:0043227//membrane-bounded organelle;GO:0043229//intracellular organelle;GO:0005912//adherens junction;GO:0070161//anchoring junction;GO:0030055//cell-substrate junction;GO:0043230//extracellular organelle;GO:0043226//organelle;GO:0032991//macromolecular complex;GO:0043231//intracellular membrane-bounded organelle;GO:1990904//ribonucleoprotein complex;GO:0036464//cytoplasmic…	GO:1901363//heterocyclic compound binding;GO:0008187//poly-pyrimidine tract binding;GO:0097159//organic cyclic compound binding;GO:0003723//RNA binding;GO:0003727//single-stranded RNA binding;GO:0070717//poly-purine tract binding;GO:0003676//nucleic acid binding;GO:0005515//protein binding;GO:0005488//binding	GO:0010468//regulation of gene expression;GO:0050794//regulation of cellular process;GO:0009056//catabolic process;GO:0044248//cellular catabolic process;GO:0046700//heterocycle catabolic process;GO:0009895//negative regulation of catabolic process;GO:0031330//negative regulation of cellular catabolic process;GO:0048523//negative regulation of cellular process;GO:0071704//organic substance metabo…
XP_005905456	0	404.247	0.001	46.8333	15.5152	1.07e-11	1.65e-09	up	RFNG	PREDICTED: beta-1,3-N-acetylglucosaminyltransferase radical fringe, partial [Bos mutus]	Metabolism;Environmental Information Processing	Glycan biosynthesis and metabolism;Signal transduction	ko04330//Notch signaling pathway;ko00514//Other types of O-glycan biosynthesis	K05948	GO:1903561//extracellular vesicle;GO:0005623//cell;GO:0012505//endomembrane system;GO:0005622//intracellular;GO:0005576//extracellular region;GO:0031090//organelle membrane;GO:0044422//organelle part;GO:0043226//organelle;GO:0044431//Golgi apparatus part;GO:0043227//membrane-bounded organelle;GO:0043231//intracellular membrane-bounded organelle;GO:0043230//extracellular organelle;GO:0031982//vesi…	GO:0008194//UDP-glycosyltransferase activity;GO:0008375//acetylglucosaminyltransferase activity;GO:0016740//transferase activity;GO:0016757//transferase activity, transferring glycosyl groups;GO:0016758//transferase activity, transferring hexosyl groups;GO:0003824//catalytic activity	GO:0051716//cellular response to stimulus;GO:0050789//regulation of biological process;GO:0050896//response to stimulus;GO:0007154//cell communication;GO:0065007//biological regulation;GO:0043393//regulation of protein binding;GO:0044700//single organism signaling;GO:0009987//cellular process;GO:0007166//cell surface receptor signaling pathway;GO:0007165//signal transduction;GO:0007219//Notch sig…
XP_005899217	0	611.98	0.001	46.7833	15.5137	2.31e-15	8.49e-13	up	STBD1	PREDICTED: starch-binding domain-containing protein 1 [Bos mutus]	-	-	-	-	GO:0044424//intracellular part;GO:0005622//intracellular;GO:0016020//membrane;GO:0031224//intrinsic component of membrane;GO:0044444//cytoplasmic part;GO:0005623//cell;GO:0044425//membrane part;GO:0044464//cell part;GO:0005737//cytoplasm	GO:0005488//binding;GO:0030246//carbohydrate binding;GO:0030247//polysaccharide binding;GO:0001871//pattern binding	GO:0016236//macroautophagy;GO:0009987//cellular process;GO:0006914//autophagy
XP_014334946	0	1064.12	0.001	45.9833	15.4888	4.4e-22	1.02e-18	up	AMFR	PREDICTED: E3 ubiquitin-protein ligase AMFR [Bison bison bison]	Genetic Information Processing	Folding, sorting and degradation	ko04141//Protein processing in endoplasmic reticulum	K10636	GO:0005737//cytoplasm;GO:0043231//intracellular membrane-bounded organelle;GO:0016020//membrane;GO:0005623//cell;GO:0043229//intracellular organelle;GO:0044425//membrane part;GO:0044432//endoplasmic reticulum part;GO:0044424//intracellular part;GO:0044444//cytoplasmic part;GO:0032991//macromolecular complex;GO:0031224//intrinsic component of membrane;GO:0005783//endoplasmic reticulum;GO:0042175//…	GO:0019787//ubiquitin-like protein transferase activity;GO:0004842//ubiquitin-protein transferase activity;GO:0044877//macromolecular complex binding;GO:0016740//transferase activity;GO:0061630//ubiquitin protein ligase activity;GO:0005515//protein binding;GO:0060089//molecular transducer activity;GO:0046872//metal ion binding;GO:0019899//enzyme binding;GO:0043167//ion binding;GO:0003824//catalyt…	GO:0044260//cellular macromolecule metabolic process;GO:0044700//single organism signaling;GO:0050789//regulation of biological process;GO:0044237//cellular metabolic process;GO:0043632//modification-dependent macromolecule catabolic process;GO:0044248//cellular catabolic process;GO:0043412//macromolecule modification;GO:0036211//protein modification process;GO:0022607//cellular component assembl…
XP_014334358	0	2000.53	0.001	45.7633	15.4819	1.33e-07	6.39e-06	up	EIF4G2	PREDICTED: eukaryotic translation initiation factor 4 gamma 2 [Pantholops hodgsonii]	Genetic Information Processing	Translation	ko03013//RNA transport	K03260	GO:0043234//protein complex;GO:0005622//intracellular;GO:0044444//cytoplasmic part;GO:0032991//macromolecular complex;GO:0044424//intracellular part;GO:0005623//cell;GO:0005737//cytoplasm;GO:0044464//cell part	GO:0097159//organic cyclic compound binding;GO:0003723//RNA binding;GO:0003676//nucleic acid binding;GO:0005488//binding;GO:0008135//translation factor activity, RNA binding;GO:1901363//heterocyclic compound binding	GO:0044260//cellular macromolecule metabolic process;GO:0071704//organic substance metabolic process;GO:0007049//cell cycle;GO:0034641//cellular nitrogen compound metabolic process;GO:0044238//primary metabolic process;GO:0009059//macromolecule biosynthetic process;GO:1901564//organonitrogen compound metabolic process;GO:0043043//peptide biosynthetic process;GO:0043604//amide biosynthetic process…
XP_005910178	0	906.55	0.001	45.62	15.4774	1.46e-17	9.63e-15	up	ATP6AP1	PREDICTED: LOW QUALITY PROTEIN: V-type proton ATPase subunit S1 [Bos mutus]	Cellular Processes;Metabolism	Energy metabolism;Transport and catabolism	ko04145//Phagosome;ko00190//Oxidative phosphorylation;ko04142//Lysosome	K03662	GO:0043234//protein complex;GO:0043226//organelle;GO:0031982//vesicle;GO:0044421//extracellular region part;GO:0044464//cell part;GO:0016020//membrane;GO:0005622//intracellular;GO:0044424//intracellular part;GO:0044425//membrane part;GO:0005737//cytoplasm;GO:0032991//macromolecular complex;GO:0033176//proton-transporting V-type ATPase complex;GO:0016469//proton-transporting two-sector ATPase comp…	GO:0016887//ATPase activity;GO:0022804//active transmembrane transporter activity;GO:0042623//ATPase activity, coupled;GO:0015405//P-P-bond-hydrolysis-driven transmembrane transporter activity;GO:0022890//inorganic cation transmembrane transporter activity;GO:0005515//protein binding;GO:0031267//small GTPase binding;GO:0051020//GTPase binding;GO:0016462//pyrophosphatase activity;GO:0008324//catio…	GO:0009966//regulation of signal transduction;GO:0010720//positive regulation of cell development;GO:0019220//regulation of phosphate metabolic process;GO:0010647//positive regulation of cell communication;GO:0031401//positive regulation of protein modification process;GO:0044763//single-organism cellular process;GO:0032502//developmental process;GO:0034220//ion transmembrane transport;GO:0055067…
XM_005910274	0	612.943	0.001	45.23	15.465	2.33e-11	3.24e-09	up	TBC1D21	PREDICTED: Bos mutus TBC1 domain family, member 21 (TBC1D21), transcript variant X1, mRNA	-	-	-	-	-	-	-
XP_005889813	0	278.47	0.001	44.6167	15.4453	4.51e-11	5.76e-09	up	ZFAND6	PREDICTED: AN1-type zinc finger protein 6 isoform X1 [Bos mutus]	-	-	-	-	GO:0005623//cell;GO:0044424//intracellular part;GO:0044464//cell part;GO:0005622//intracellular	GO:0046914//transition metal ion binding;GO:0043130//ubiquitin binding;GO:0043169//cation binding;GO:0005515//protein binding;GO:0043167//ion binding;GO:0005488//binding;GO:0032182//ubiquitin-like protein binding;GO:0046872//metal ion binding	GO:0051716//cellular response to stimulus;GO:0071702//organic substance transport;GO:0023052//signaling;GO:0065007//biological regulation;GO:0034613//cellular protein localization;GO:0006915//apoptotic process;GO:0006810//transport;GO:0050794//regulation of cellular process;GO:0051179//localization;GO:0008104//protein localization;GO:0006886//intracellular protein transport;GO:0035556//intracellu…
XP_005889814	0	278.47	0.001	44.6167	15.4453	4.48e-11	5.74e-09	up	ZFAND6	PREDICTED: AN1-type zinc finger protein 6 isoform X1 [Bos mutus]	-	-	-	-	GO:0005623//cell;GO:0005622//intracellular;GO:0044424//intracellular part;GO:0044464//cell part	GO:0032182//ubiquitin-like protein binding;GO:0005515//protein binding;GO:0046914//transition metal ion binding;GO:0043169//cation binding;GO:0043167//ion binding;GO:0046872//metal ion binding;GO:0005488//binding;GO:0043130//ubiquitin binding	GO:0045184//establishment of protein localization;GO:0042221//response to chemical;GO:0034097//response to cytokine;GO:0008104//protein localization;GO:0006886//intracellular protein transport;GO:0044699//single-organism process;GO:0050896//response to stimulus;GO:0051234//establishment of localization;GO:0051641//cellular localization;GO:0051179//localization;GO:0051716//cellular response to sti…
XP_014337501	0	11.7433	0.001	43.5933	15.4118	0.00695549	0.0587568	no	PROM1	PREDICTED: prominin-1 [Bison bison bison]	-	-	-	-	GO:0005576//extracellular region;GO:0043229//intracellular organelle;GO:0031513//nonmotile primary cilium;GO:0044421//extracellular region part;GO:0043230//extracellular organelle;GO:0072372//primary cilium;GO:0044464//cell part;GO:0001750//photoreceptor outer segment;GO:0043231//intracellular membrane-bounded organelle;GO:0005623//cell;GO:0031224//intrinsic component of membrane;GO:0044425//memb…	GO:0008092//cytoskeletal protein binding;GO:0005515//protein binding;GO:0050839//cell adhesion molecule binding;GO:0005488//binding	GO:0072182//regulation of nephron tubule epithelial cell differentiation;GO:0030855//epithelial cell differentiation;GO:0030182//neuron differentiation;GO:0090596//sensory organ morphogenesis;GO:0043010//camera-type eye development;GO:0022008//neurogenesis;GO:2000026//regulation of multicellular organismal development;GO:0072001//renal system development;GO:0048593//camera-type eye morphogenesis;…
XP_005899553	0	864.66	0.001	43.3633	15.4042	7.11e-20	9.63e-17	up	UBXN4	PREDICTED: UBX domain-containing protein 4 [Bos mutus]	-	-	-	-	GO:0043227//membrane-bounded organelle;GO:0043226//organelle;GO:0044424//intracellular part;GO:0043229//intracellular organelle;GO:0005623//cell;GO:0043231//intracellular membrane-bounded organelle;GO:0044464//cell part;GO:0005622//intracellular	-	GO:0071704//organic substance metabolic process;GO:0010033//response to organic substance;GO:0043170//macromolecule metabolic process;GO:0044710//single-organism metabolic process;GO:0009987//cellular process;GO:0009056//catabolic process;GO:0044238//primary metabolic process;GO:0030163//protein catabolic process;GO:0019538//protein metabolic process;GO:0034976//response to endoplasmic reticulum …
XM_005908621	0	1325.23	0.001	43.0767	15.3946	8.16e-18	5.62e-15	up	LCA5L	PREDICTED: Bos mutus Leber congenital amaurosis 5-like (LCA5L), mRNA	-	-	-	-	-	-	-
XM_014477543	0	894.333	0.001	42.8433	15.3868	2.15e-13	4.96e-11	up	FSCN3	PREDICTED: Bos mutus fascin actin-bundling protein 3, testicular (FSCN3), mRNA	-	-	-	-	GO:0043228//non-membrane-bounded organelle;GO:0043232//intracellular non-membrane-bounded organelle;GO:0043226//organelle;GO:0043229//intracellular organelle;GO:0044424//intracellular part;GO:0044464//cell part;GO:0005623//cell;GO:0005622//intracellular	GO:0008092//cytoskeletal protein binding;GO:0003779//actin binding;GO:0005488//binding;GO:0005515//protein binding	GO:0044699//single-organism process;GO:0007281//germ cell development;GO:0048609//multicellular organismal reproductive process;GO:0022412//cellular process involved in reproduction in multicellular organism;GO:0030036//actin cytoskeleton organization;GO:1902589//single-organism organelle organization;GO:0071840//cellular component organization or biogenesis;GO:0009987//cellular process;GO:003015…
XP_005897899	0	242.923	0.001	42.66	15.3806	1.61e-09	1.33e-07	up	PPP1R2	PREDICTED: protein phosphatase inhibitor 2 isoform X1 [Bos mutus]	-	-	-	-	-	GO:0004857//enzyme inhibitor activity;GO:0019208//phosphatase regulator activity;GO:0098772//molecular function regulator;GO:0019212//phosphatase inhibitor activity;GO:0030234//enzyme regulator activity	GO:0044238//primary metabolic process;GO:0009987//cellular process;GO:0051716//cellular response to stimulus;GO:0019220//regulation of phosphate metabolic process;GO:0044092//negative regulation of molecular function;GO:0005975//carbohydrate metabolic process;GO:0005976//polysaccharide metabolic process;GO:0044042//glucan metabolic process;GO:0007154//cell communication;GO:0044763//single-organis…
XP_005897900	0	242.923	0.001	42.66	15.3806	1.61e-09	1.33e-07	up	PPP1R2	PREDICTED: protein phosphatase inhibitor 2 isoform X1 [Bos mutus]	-	-	-	-	-	GO:0019208//phosphatase regulator activity;GO:0019212//phosphatase inhibitor activity;GO:0098772//molecular function regulator;GO:0004857//enzyme inhibitor activity;GO:0030234//enzyme regulator activity	GO:0044262//cellular carbohydrate metabolic process;GO:0010921//regulation of phosphatase activity;GO:0044260//cellular macromolecule metabolic process;GO:0044238//primary metabolic process;GO:0050896//response to stimulus;GO:0051336//regulation of hydrolase activity;GO:0007154//cell communication;GO:0006073//cellular glucan metabolic process;GO:0044092//negative regulation of molecular function;…
XM_014481277	0	531.717	0.001	42.5	15.3752	2.23e-11	3.12e-09	up	LOC102267338	PREDICTED: Bos mutus hypothetical protein (LOC102267338), transcript variant X1, mRNA	-	-	-	-	-	-	-
XM_014477939	0	614.773	0.001	42.2333	15.3661	1.93e-14	5.6e-12	up	ODF4	PREDICTED: Bos mutus outer dense fiber of sperm tails 4 (ODF4), mRNA	-	-	-	-	GO:0042995//cell projection;GO:0005623//cell;GO:0044425//membrane part;GO:0043226//organelle;GO:0005929//cilium;GO:0016020//membrane;GO:0031224//intrinsic component of membrane;GO:0044464//cell part	-	GO:0048232//male gamete generation;GO:0044703//multi-organism reproductive process;GO:0044702//single organism reproductive process;GO:0044767//single-organism developmental process;GO:0044699//single-organism process;GO:0000003//reproduction;GO:0044707//single-multicellular organism process;GO:0032501//multicellular organismal process;GO:0048609//multicellular organismal reproductive process;GO:…
XP_005897296	0	490.233	0.001	41.7933	15.351	3.76e-15	1.3e-12	up	TMEM59	PREDICTED: transmembrane protein 59 isoform X1 [Bos mutus]	-	-	-	-	GO:0044446//intracellular organelle part;GO:0031984//organelle subcompartment;GO:0005622//intracellular;GO:0043226//organelle;GO:0005737//cytoplasm;GO:0005795//Golgi stack;GO:0044424//intracellular part;GO:0043230//extracellular organelle;GO:0044464//cell part;GO:0012505//endomembrane system;GO:0005773//vacuole;GO:0005768//endosome;GO:0098791//Golgi subcompartment;GO:0005576//extracellular region…	GO:0003824//catalytic activity;GO:0016787//hydrolase activity;GO:0008233//peptidase activity;GO:0070011//peptidase activity, acting on L-amino acid peptides	GO:0006914//autophagy;GO:0044238//primary metabolic process;GO:0034645//cellular macromolecule biosynthetic process;GO:0044237//cellular metabolic process;GO:0072659//protein localization to plasma membrane;GO:0070085//glycosylation;GO:0071840//cellular component organization or biogenesis;GO:1902578//single-organism localization;GO:0006508//proteolysis;GO:0043413//macromolecule glycosylation;GO:…
XP_005907343	0	640.507	0.001	41.74	15.3491	1.89e-16	9.22e-14	up	FGFR1OP	FGFR1 oncogene partner, partial [Bos mutus]	-	-	-	-	GO:0044430//cytoskeletal part;GO:0005622//intracellular;GO:0044424//intracellular part;GO:0044446//intracellular organelle part;GO:0005623//cell;GO:0043232//intracellular non-membrane-bounded organelle;GO:0044444//cytoplasmic part;GO:0043229//intracellular organelle;GO:0015630//microtubule cytoskeleton;GO:0044422//organelle part;GO:0005737//cytoplasm;GO:0044464//cell part;GO:0043226//organelle;GO…	GO:0019207//kinase regulator activity;GO:0019210//kinase inhibitor activity;GO:0004857//enzyme inhibitor activity;GO:0019899//enzyme binding;GO:0019900//kinase binding;GO:0005515//protein binding;GO:0030234//enzyme regulator activity;GO:0004860//protein kinase inhibitor activity;GO:0046983//protein dimerization activity;GO:0005488//binding;GO:0019887//protein kinase regulator activity;GO:0098772/…	GO:0006469//negative regulation of protein kinase activity;GO:0019222//regulation of metabolic process;GO:0019220//regulation of phosphate metabolic process;GO:0051174//regulation of phosphorus metabolic process;GO:0050789//regulation of biological process;GO:0031399//regulation of protein modification process;GO:0080090//regulation of primary metabolic process;GO:0043549//regulation of kinase ac…
Unigene000179	0	14.6667	0.001	41.6867	15.3473	0.00276096	0.0289537	up	-	-	-	-	-	-	-	-	-
XP_005889460	0	1043.94	0.001	41.45	15.3391	9.97e-21	1.76e-17	up	WAC	PREDICTED: WW domain-containing adapter protein with coiled-coil isoform X1 [Bison bison bison]	-	-	-	-	GO:0043227//membrane-bounded organelle;GO:0032991//macromolecular complex;GO:0070013//intracellular organelle lumen;GO:0044464//cell part;GO:0044446//intracellular organelle part;GO:0030529//intracellular ribonucleoprotein complex;GO:0044428//nuclear part;GO:0005623//cell;GO:0044422//organelle part;GO:0044424//intracellular part;GO:0005622//intracellular;GO:0043229//intracellular organelle;GO:000…	GO:0005488//binding;GO:0044877//macromolecular complex binding	GO:0043412//macromolecule modification;GO:0000075//cell cycle checkpoint;GO:0071704//organic substance metabolic process;GO:0016574//histone ubiquitination;GO:0044238//primary metabolic process;GO:0016043//cellular component organization;GO:0051246//regulation of protein metabolic process;GO:0032446//protein modification by small protein conjugation;GO:0044249//cellular biosynthetic process;GO:19…
XP_005904529	0	718.493	0.001	41.32	15.3346	1.83e-16	8.98e-14	up	CDR2	PREDICTED: cerebellar degeneration-related protein 2 [Bos mutus]	-	-	-	-	-	-	-
XM_005890713	0	756	0.001	41.31	15.3342	8.24e-13	1.64e-10	up	ACTL9	PREDICTED: Bos mutus actin-like 9 (ACTL9), mRNA	-	-	-	-	GO:0044424//intracellular part;GO:0043229//intracellular organelle;GO:0043226//organelle;GO:0043232//intracellular non-membrane-bounded organelle;GO:0043228//non-membrane-bounded organelle;GO:0005622//intracellular;GO:0044464//cell part;GO:0005623//cell	-	-
XM_014478576	0	251	0.001	40.9667	15.3222	3.21e-09	2.44e-07	up	LOC102278990	PREDICTED: Bos mutus transmembrane protein 230 (LOC102278990), mRNA	-	-	-	-	-	-	-
XP_014337417	0	16.5533	0.001	40.5733	15.3082	0.00326951	0.0330676	up	LOC106701397	TPA: bicaudal D homolog 2-like [Bos taurus]	-	-	-	-	GO:0033646//host intracellular part;GO:0005623//cell;GO:0005794//Golgi apparatus;GO:0033643//host cell part;GO:0033647//host intracellular organelle;GO:0043226//organelle;GO:0043656//intracellular region of host;GO:0043231//intracellular membrane-bounded organelle;GO:0005622//intracellular;GO:0033648//host intracellular membrane-bounded organelle;GO:0044217//other organism part;GO:0005737//cytopl…	GO:0051020//GTPase binding;GO:0031267//small GTPase binding;GO:0019899//enzyme binding;GO:0001664//G-protein coupled receptor binding;GO:0030674//protein binding, bridging;GO:0005102//receptor binding;GO:0005488//binding;GO:0017016//Ras GTPase binding;GO:0008092//cytoskeletal protein binding;GO:0060090//binding, bridging;GO:0005515//protein binding	GO:0050794//regulation of cellular process;GO:0044699//single-organism process;GO:0065007//biological regulation;GO:0010517//regulation of phospholipase activity;GO:0034622//cellular macromolecular complex assembly;GO:0016192//vesicle-mediated transport;GO:0071840//cellular component organization or biogenesis;GO:0070727//cellular macromolecule localization;GO:1902578//single-organism localizatio…
XP_005892759	0	693.43	0.001	39.6633	15.2755	3.04e-18	2.57e-15	up	ENO1	PREDICTED: alpha-enolase isoform X2 [Bos taurus]	Genetic Information Processing;Environmental Information Processing;Metabolism	Signal transduction;Global and Overview;Carbohydrate metabolism;Folding, sorting and degradation	ko01200//Carbon metabolism;ko04066//HIF-1 signaling pathway;ko01230//Biosynthesis of amino acids;ko03018//RNA degradation;ko00010//Glycolysis / Gluconeogenesis	K01689	GO:0044421//extracellular region part;GO:0005623//cell;GO:0043227//membrane-bounded organelle;GO:0044464//cell part;GO:0031982//vesicle;GO:0005576//extracellular region;GO:0005622//intracellular;GO:0043230//extracellular organelle;GO:1903561//extracellular vesicle;GO:0043231//intracellular membrane-bounded organelle;GO:0043229//intracellular organelle;GO:0043226//organelle;GO:0005886//plasma memb…	GO:0003676//nucleic acid binding;GO:0016829//lyase activity;GO:0046872//metal ion binding;GO:0043169//cation binding;GO:0003824//catalytic activity;GO:0016836//hydro-lyase activity;GO:0016835//carbon-oxygen lyase activity;GO:0046983//protein dimerization activity;GO:0005488//binding;GO:0019899//enzyme binding;GO:0003723//RNA binding;GO:0043167//ion binding;GO:0097159//organic cyclic compound bind…	GO:0044767//single-organism developmental process;GO:0044281//small molecule metabolic process;GO:0009058//biosynthetic process;GO:0043207//response to external biotic stimulus;GO:0007275//multicellular organism development;GO:0040007//growth;GO:0071704//organic substance metabolic process;GO:0097659//nucleic acid-templated transcription;GO:0009987//cellular process;GO:1901360//organic cyclic com…
XM_005907428	0	911.117	0.001	39.3333	15.2635	9.3e-13	1.82e-10	up	GALNTL5	PREDICTED: Bos mutus polypeptide N-acetylgalactosaminyltransferase-like 5 (GALNTL5), transcript variant X1, mRNA	Metabolism	Glycan biosynthesis and metabolism	ko00512//Mucin type O-glycan biosynthesis	K00710	GO:0031224//intrinsic component of membrane;GO:0016020//membrane;GO:0044425//membrane part	GO:0003824//catalytic activity	-
XP_005902505	0	590.357	0.001	39.31	15.2626	8.73e-13	1.72e-10	up	RASSF8	ras association domain-containing protein 8 [Bos taurus]	-	-	-	-	-	-	-
XP_005910792	0	2177.33	0.001	39.2367	15.2599	2.07e-27	3.83e-23	up	DHX30	DEAH (Asp-Glu-Ala-His) box polypeptide 30 [Mus musculus]	-	-	-	-	-	-	-
XP_005892052	0	2682.26	0.001	39.1233	15.2557	4.48e-26	6.21e-22	up	RB1CC1	PREDICTED: RB1-inducible coiled-coil protein 1 [Bos mutus]	-	-	-	-	-	-	-
XM_005903465	0	172.547	0.001	38.5367	15.2339	7.65e-07	2.95e-05	up	LOC102287557	PREDICTED: Bos mutus protein tyrosine phosphatase type IVA 1 (LOC102287557), transcript variant X1, mRNA	-	-	-	-	GO:1903561//extracellular vesicle;GO:0044464//cell part;GO:0043230//extracellular organelle;GO:0043232//intracellular non-membrane-bounded organelle;GO:0016020//membrane;GO:0005737//cytoplasm;GO:0044424//intracellular part;GO:0031982//vesicle;GO:0005773//vacuole;GO:0043228//non-membrane-bounded organelle;GO:0043231//intracellular membrane-bounded organelle;GO:0043226//organelle;GO:0005622//intrac…	GO:0042578//phosphoric ester hydrolase activity;GO:0004725//protein tyrosine phosphatase activity;GO:0016791//phosphatase activity;GO:0016787//hydrolase activity;GO:0016788//hydrolase activity, acting on ester bonds;GO:0004721//phosphoprotein phosphatase activity;GO:0003824//catalytic activity	GO:0051674//localization of cell;GO:0006928//movement of cell or subcellular component;GO:0040011//locomotion;GO:0044260//cellular macromolecule metabolic process;GO:0036211//protein modification process;GO:0044699//single-organism process;GO:0051179//localization;GO:0009987//cellular process;GO:0006793//phosphorus metabolic process;GO:0006464//cellular protein modification process;GO:0043412//ma…
XM_014483228	0	250	0.001	38.5133	15.2331	4.67e-08	2.52e-06	up	CSTL1	PREDICTED: Bos mutus cystatin-like 1 (CSTL1), mRNA	-	-	-	-	-	GO:0030234//enzyme regulator activity;GO:0004857//enzyme inhibitor activity;GO:0098772//molecular function regulator	GO:0052547//regulation of peptidase activity;GO:0030162//regulation of proteolysis;GO:0051346//negative regulation of hydrolase activity;GO:0060255//regulation of macromolecule metabolic process;GO:0051248//negative regulation of protein metabolic process;GO:0032268//regulation of cellular protein metabolic process;GO:0044092//negative regulation of molecular function;GO:0010466//negative regulat…
XP_005903266	0	1525.38	0.001	38.5133	15.2331	1.54e-15	5.85e-13	up	LPIN1	PREDICTED: phosphatidate phosphatase LPIN1 isoform X2 [Bos mutus]	Metabolism	Lipid metabolism	ko00564//Glycerophospholipid metabolism;ko00561//Glycerolipid metabolism	K15728	-	GO:0003824//catalytic activity;GO:0042578//phosphoric ester hydrolase activity;GO:0016788//hydrolase activity, acting on ester bonds;GO:0016787//hydrolase activity;GO:0016791//phosphatase activity	GO:0006351//transcription, DNA-templated;GO:0044260//cellular macromolecule metabolic process;GO:0006638//neutral lipid metabolic process;GO:0018130//heterocycle biosynthetic process;GO:0019752//carboxylic acid metabolic process;GO:0044238//primary metabolic process;GO:0044710//single-organism metabolic process;GO:1901576//organic substance biosynthetic process;GO:0019438//aromatic compound biosy…
XM_005906882	0	857.047	0.001	38.1433	15.2191	2.87e-14	8e-12	up	UBQLN3	PREDICTED: Bos mutus ubiquilin 3 (UBQLN3), mRNA	-	-	-	-	-	-	-
XP_014337679	0	113.2	0.001	38.03	15.2149	7.59e-07	2.93e-05	up	AKIRIN1	PREDICTED: akirin-1-like [Pantholops hodgsonii]	-	-	-	-	GO:0070013//intracellular organelle lumen;GO:0012505//endomembrane system;GO:0031981//nuclear lumen;GO:0005622//intracellular;GO:0043227//membrane-bounded organelle;GO:0044446//intracellular organelle part;GO:0005634//nucleus;GO:0044424//intracellular part;GO:0031975//envelope;GO:0044464//cell part;GO:0043233//organelle lumen;GO:0005635//nuclear envelope;GO:0044428//nuclear part;GO:0043226//organ…	-	-
XM_005910522	0	360.807	0.001	36.9933	15.175	4.3e-08	2.34e-06	up	LOC102275963	PREDICTED: Bos mutus hypothetical protein (LOC102275963), transcript variant X1, mRNA	-	-	-	-	-	-	-
XP_014339224	0	281.51	0.001	36.8233	15.1683	3.02e-11	4.09e-09	up	RAB2A	PREDICTED: ras-related protein Rab-2A [Bos mutus]	Environmental Information Processing	Signal transduction	ko04152//AMPK signaling pathway	K07877	GO:0016020//membrane;GO:0042175//nuclear outer membrane-endoplasmic reticulum membrane network;GO:0044421//extracellular region part;GO:0005576//extracellular region;GO:0044444//cytoplasmic part;GO:0043227//membrane-bounded organelle;GO:0031988//membrane-bounded vesicle;GO:0043229//intracellular organelle;GO:0048770//pigment granule;GO:0005773//vacuole;GO:0031410//cytoplasmic vesicle;GO:0044422//…	GO:0016462//pyrophosphatase activity;GO:0001883//purine nucleoside binding;GO:0016818//hydrolase activity, acting on acid anhydrides, in phosphorus-containing anhydrides;GO:0016817//hydrolase activity, acting on acid anhydrides;GO:0003824//catalytic activity;GO:0017111//nucleoside-triphosphatase activity;GO:0032550//purine ribonucleoside binding;GO:0016787//hydrolase activity;GO:0036094//small mo…	GO:0033036//macromolecule localization;GO:0044700//single organism signaling;GO:0000087//mitotic M phase;GO:0050896//response to stimulus;GO:0007264//small GTPase mediated signal transduction;GO:0051179//localization;GO:0007265//Ras protein signal transduction;GO:0044699//single-organism process;GO:0050789//regulation of biological process;GO:0023052//signaling;GO:0035556//intracellular signal tr…
XM_005896370	0	174.667	0.001	36.1433	15.1414	6.11e-07	2.43e-05	up	LOC102265045	PREDICTED: Bos mutus uncharacterized LOC102265045 (LOC102265045), mRNA	-	-	-	-	-	-	-
XP_014337169	0	122.607	0.001	36.05	15.1377	1.18e-06	4.31e-05	up	MS4A4A	PREDICTED: membrane-spanning 4-domains, subfamily A-like isoform X4 [Bos taurus]	-	-	-	-	GO:0016020//membrane	-	-
XM_014481630	0	481.94	0.001	35.81	15.1281	2.1e-13	4.86e-11	up	LOC102283525	PREDICTED: Bos mutus GTPase IMAP family member 7 (LOC102283525), transcript variant X2, mRNA	-	-	-	-	-	-	-
XP_005900711	0	697.027	0.001	35.75	15.1257	5.13e-17	2.85e-14	up	SEPT4	PREDICTED: septin-4 isoform X2 [Bos mutus]	-	-	-	-	GO:0044464//cell part;GO:0005929//cilium;GO:0044446//intracellular organelle part;GO:0044424//intracellular part;GO:0005623//cell;GO:0097223//sperm part;GO:0044428//nuclear part;GO:0044422//organelle part;GO:0043226//organelle;GO:0005634//nucleus;GO:0043233//organelle lumen;GO:0043227//membrane-bounded organelle;GO:0070013//intracellular organelle lumen;GO:0043229//intracellular organelle;GO:0042…	GO:0001882//nucleoside binding;GO:0032550//purine ribonucleoside binding;GO:0097159//organic cyclic compound binding;GO:0032549//ribonucleoside binding;GO:0097367//carbohydrate derivative binding;GO:0036094//small molecule binding;GO:1901363//heterocyclic compound binding;GO:0005488//binding;GO:0001883//purine nucleoside binding	GO:0043170//macromolecule metabolic process;GO:0022412//cellular process involved in reproduction in multicellular organism;GO:0051704//multi-organism process;GO:0044707//single-multicellular organism process;GO:0032446//protein modification by small protein conjugation;GO:0048856//anatomical structure development;GO:0032501//multicellular organismal process;GO:0008152//metabolic process;GO:00073…
XP_005890760	0	217.65	0.001	35.6933	15.1234	8.57e-09	5.85e-07	up	LOC102267375	60S ribosomal protein L10-like [Bos taurus]	Genetic Information Processing	Translation	ko03010//Ribosome	K02866	-	-	-
XP_014334951	0	480.603	0.001	35.4533	15.1136	5.53e-12	9.02e-10	up	CCDC113	PREDICTED: coiled-coil domain-containing protein 113 isoform X1 [Bison bison bison]	-	-	-	-	GO:0005815//microtubule organizing center;GO:0043232//intracellular non-membrane-bounded organelle;GO:0043226//organelle;GO:0043228//non-membrane-bounded organelle;GO:0044422//organelle part;GO:0044430//cytoskeletal part;GO:0043229//intracellular organelle;GO:0005856//cytoskeleton;GO:0015630//microtubule cytoskeleton;GO:0044424//intracellular part;GO:0044464//cell part;GO:0032991//macromolecular …	-	GO:0009987//cellular process;GO:0071840//cellular component organization or biogenesis;GO:0032502//developmental process;GO:0022607//cellular component assembly;GO:0044085//cellular component biogenesis;GO:0010927//cellular component assembly involved in morphogenesis;GO:0048869//cellular developmental process;GO:0032989//cellular component morphogenesis;GO:0048856//anatomical structure developme…
XP_005896792	0	1558.43	0.001	35.45	15.1135	9.97e-24	6.15e-20	up	IPO5	PREDICTED: importin-5 isoform X1 [Bos mutus]	-	-	-	-	-	-	-
XM_014483774	0	511.37	0.001	35.39	15.1111	4.86e-11	6.09e-09	up	LOC106701758	PREDICTED: Bos mutus protein FAM170A-like (LOC106701758), mRNA	-	-	-	-	-	-	-
XP_005902263	0	50.7367	0.001	35.3433	15.1092	0.00141652	0.0169842	up	LOC102280322	PREDICTED: spermatid nuclear transition protein 3-like [Bos mutus]	-	-	-	-	-	-	-
XM_005910597	0	413.383	0.001	35.3167	15.1081	2.93e-10	2.97e-08	up	LOC102276347	PREDICTED: Bos mutus chromosome unknown open reading frame, human C8orf74 (LOC102276347), mRNA	-	-	-	-	-	-	-
XM_014482233	0	854	0.001	34.8833	15.0903	1.97e-13	4.63e-11	up	LOC102273846	PREDICTED: Bos mutus tripartite motif-containing protein 47 (LOC102273846), mRNA	-	-	-	-	-	GO:0043169//cation binding;GO:0043167//ion binding;GO:0046914//transition metal ion binding;GO:0005488//binding;GO:0046872//metal ion binding	-
XM_005909348	0	141.73	0.001	34.88	15.0901	2.77e-07	1.21e-05	up	TMEM89	PREDICTED: Bos mutus transmembrane protein 89 (TMEM89), mRNA	-	-	-	-	GO:0016020//membrane;GO:0031224//intrinsic component of membrane;GO:0044425//membrane part	-	-
XP_005887089	0	793.343	0.001	34.78	15.086	4.02e-17	2.39e-14	up	RPN1	PREDICTED: dolichyl-diphosphooligosaccharide--protein glycosyltransferase subunit 1-like [Bos mutus]	Metabolism;Genetic Information Processing	Folding, sorting and degradation;Glycan biosynthesis and metabolism	ko04141//Protein processing in endoplasmic reticulum;ko00510//N-Glycan biosynthesis	K12666	-	-	-
XP_005889939	0	276.68	0.001	34.5267	15.0754	4.34e-11	5.6e-09	up	SBDS	PREDICTED: ribosome maturation protein SBDS [Bos mutus]	Genetic Information Processing	Translation	ko03008//Ribosome biogenesis in eukaryotes	K14574	-	-	-
XP_005902180	0	454.547	0.001	34.03	15.0545	2.85e-14	7.99e-12	up	PCBP2	poly(rC)-binding protein 2 isoform a [Homo sapiens]	-	-	-	-	GO:0043227//membrane-bounded organelle;GO:0070161//anchoring junction;GO:0044464//cell part;GO:0030054//cell junction;GO:0005623//cell;GO:0030055//cell-substrate junction;GO:0005634//nucleus;GO:0044422//organelle part;GO:0005737//cytoplasm;GO:0044446//intracellular organelle part;GO:0043230//extracellular organelle;GO:0043231//intracellular membrane-bounded organelle;GO:0005622//intracellular;GO:…	GO:0097159//organic cyclic compound binding;GO:0005488//binding;GO:0019899//enzyme binding;GO:0005515//protein binding;GO:0003697//single-stranded DNA binding;GO:0003677//DNA binding;GO:0044389//ubiquitin-like protein ligase binding;GO:1901363//heterocyclic compound binding;GO:0003676//nucleic acid binding;GO:0003723//RNA binding	GO:0044249//cellular biosynthetic process;GO:1901575//organic substance catabolic process;GO:0044403//symbiosis, encompassing mutualism through parasitism;GO:0002683//negative regulation of immune system process;GO:0006396//RNA processing;GO:0044237//cellular metabolic process;GO:0006511//ubiquitin-dependent protein catabolic process;GO:0071704//organic substance metabolic process;GO:1901360//org…
XP_014335946	0	360.863	0.001	33.9967	15.0531	3.77e-11	4.95e-09	up	GDPD1	Glycerophosphodiester phosphodiesterase domain-containing protein 1 [Bos mutus]	-	-	-	-	GO:0044425//membrane part;GO:0031224//intrinsic component of membrane;GO:0016020//membrane	GO:0003824//catalytic activity;GO:0008081//phosphoric diester hydrolase activity;GO:0016787//hydrolase activity;GO:0016788//hydrolase activity, acting on ester bonds;GO:0042578//phosphoric ester hydrolase activity	-
XM_005888030	0	435.667	0.001	33.95	15.0511	9e-10	8.08e-08	up	CYLC2	PREDICTED: Bos mutus cylicin, basic protein of sperm head cytoskeleton 2 (CYLC2), mRNA	-	-	-	-	GO:0043232//intracellular non-membrane-bounded organelle;GO:0043226//organelle;GO:0043228//non-membrane-bounded organelle;GO:0043229//intracellular organelle;GO:0005737//cytoplasm;GO:0005856//cytoskeleton;GO:0044424//intracellular part;GO:0044464//cell part;GO:0005623//cell;GO:0005622//intracellular	-	GO:0044699//single-organism process;GO:0032502//developmental process;GO:0032501//multicellular organismal process;GO:0044767//single-organism developmental process
XM_005908966	0	1587.82	0.001	33.7433	15.0423	1.02e-21	2.03e-18	up	LOC102266247	PREDICTED: Bos mutus disintegrin and metalloproteinase domain-containing protein 1a (LOC102266247), mRNA	-	-	-	-	GO:0016020//membrane;GO:0044425//membrane part;GO:0031224//intrinsic component of membrane	GO:0005488//binding;GO:0003824//catalytic activity;GO:0070011//peptidase activity, acting on L-amino acid peptides;GO:0046872//metal ion binding;GO:0016787//hydrolase activity;GO:0046914//transition metal ion binding;GO:0043169//cation binding;GO:0043167//ion binding;GO:0008233//peptidase activity	GO:0008152//metabolic process;GO:0044238//primary metabolic process;GO:0071704//organic substance metabolic process;GO:0043170//macromolecule metabolic process;GO:0019538//protein metabolic process
XP_005888457	0	460.36	0.001	33.6467	15.0382	1.58e-14	4.76e-12	up	LRRC28	PREDICTED: leucine-rich repeat-containing protein 28 [Bos mutus]	-	-	-	-	-	-	-
XM_014481390	0	518.38	0.001	33.59	15.0357	3.81e-14	1.04e-11	up	LOC106701321	PREDICTED: Bos mutus transmembrane protein 202-like (LOC106701321), transcript variant X2, mRNA	-	-	-	-	-	-	-
XM_005888514	0	510	0.001	33.5067	15.0322	1.1e-10	1.23e-08	up	GLT6D1	PREDICTED: Bos mutus glycosyltransferase 6 domain containing 1 (GLT6D1), mRNA	-	-	-	-	GO:0044425//membrane part;GO:0031224//intrinsic component of membrane;GO:0016020//membrane	GO:0016740//transferase activity;GO:0016757//transferase activity, transferring glycosyl groups;GO:0003824//catalytic activity	-
XM_005896662	0	294.143	0.001	33.1833	15.0182	3.3e-09	2.49e-07	up	SPACA3	PREDICTED: Bos mutus sperm acrosome associated 3 (SPACA3), transcript variant X1, mRNA	-	-	-	-	GO:0044444//cytoplasmic part;GO:0012505//endomembrane system;GO:0043226//organelle;GO:0043231//intracellular membrane-bounded organelle;GO:0005622//intracellular;GO:0005737//cytoplasm;GO:0043229//intracellular organelle;GO:0031410//cytoplasmic vesicle;GO:0031982//vesicle;GO:0016023//cytoplasmic, membrane-bounded vesicle;GO:0097708//intracellular vesicle;GO:0044424//intracellular part;GO:0099503//…	GO:0003824//catalytic activity;GO:0004553//hydrolase activity, hydrolyzing O-glycosyl compounds;GO:0016798//hydrolase activity, acting on glycosyl bonds;GO:0016787//hydrolase activity	GO:0051704//multi-organism process;GO:0044699//single-organism process;GO:0022414//reproductive process;GO:0009566//fertilization;GO:0044703//multi-organism reproductive process;GO:0000003//reproduction;GO:0007338//single fertilization;GO:0044702//single organism reproductive process;GO:0019953//sexual reproduction
XP_005894790	0	1636.48	0.001	33.1067	15.0148	7.94e-23	2.94e-19	up	NRD1	PREDICTED: nardilysin isoform X2 [Bos mutus]	-	-	-	-	-	-	-
XP_014332503	0	142.55	0.001	33.1	15.0145	4.9e-07	2e-05	up	LGALSL	PREDICTED: galectin-related protein [Bison bison bison]	-	-	-	-	GO:0005623//cell;GO:0044464//cell part	GO:0005488//binding	-
XP_005903221	0	170.86	0.001	32.9733	15.009	1.02e-08	6.69e-07	up	RWDD4	RWD domain-containing protein 4 [Bos taurus]	-	-	-	-	-	-	-
XM_005904565	0	118.46	0.001	32.8933	15.0055	3.66e-06	0.000115589	up	BANF2	PREDICTED: Bos mutus barrier to autointegration factor 2 (BANF2), mRNA	-	-	-	-	GO:0044424//intracellular part;GO:0005623//cell;GO:0043226//organelle;GO:0005622//intracellular;GO:0044464//cell part;GO:0043227//membrane-bounded organelle;GO:0043231//intracellular membrane-bounded organelle;GO:0043229//intracellular organelle	-	-
XP_005898939	0	653.233	0.001	32.7633	14.9998	1.14e-15	4.47e-13	up	RIOK3	PREDICTED: serine/threonine-protein kinase RIO3 isoform X1 [Bos mutus]	-	-	-	-	-	GO:0001883//purine nucleoside binding;GO:0043169//cation binding;GO:0043167//ion binding;GO:0032550//purine ribonucleoside binding;GO:0036094//small molecule binding;GO:0005488//binding;GO:0097159//organic cyclic compound binding;GO:0016772//transferase activity, transferring phosphorus-containing groups;GO:0032549//ribonucleoside binding;GO:0097367//carbohydrate derivative binding;GO:1901363//he…	GO:0009987//cellular process;GO:0043412//macromolecule modification;GO:0019538//protein metabolic process;GO:0006793//phosphorus metabolic process;GO:0006796//phosphate-containing compound metabolic process;GO:0044267//cellular protein metabolic process;GO:0071704//organic substance metabolic process;GO:0008152//metabolic process;GO:0044238//primary metabolic process;GO:0044260//cellular macromol…
XM_005900753	0	562.083	0.001	32.6433	14.9945	1.92e-11	2.74e-09	up	LOC102270784	PREDICTED: Bos mutus protein FAM205CP (LOC102270784), transcript variant X1, mRNA	-	-	-	-	GO:0031224//intrinsic component of membrane;GO:0016020//membrane;GO:0044425//membrane part	-	-
XM_014478541	0	587.09	0.001	32.6167	14.9933	5.14e-13	1.07e-10	up	SPERT	PREDICTED: Bos mutus spermatid associated (SPERT), transcript variant X1, mRNA	-	-	-	-	-	-	-
XP_005889626	0	388.163	0.001	32.6067	14.9929	4.63e-13	9.84e-11	up	PSIP1	PREDICTED: PC4 and SFRS1-interacting protein isoform X2 [Bos mutus]	-	-	-	-	GO:0044424//intracellular part;GO:0070013//intracellular organelle lumen;GO:0031974//membrane-enclosed lumen;GO:0043231//intracellular membrane-bounded organelle;GO:0043227//membrane-bounded organelle;GO:0044427//chromosomal part;GO:0043233//organelle lumen;GO:0005622//intracellular;GO:0000228//nuclear chromosome;GO:0043232//intracellular non-membrane-bounded organelle;GO:0005694//chromosome;GO:0…	GO:0001104//RNA polymerase II transcription cofactor activity;GO:0008134//transcription factor binding;GO:0001076//transcription factor activity, RNA polymerase II transcription factor binding;GO:0043566//structure-specific DNA binding;GO:0000989//transcription factor activity, transcription factor binding;GO:0003712//transcription cofactor activity;GO:0044877//macromolecular complex binding;GO:0…	GO:0022618//ribonucleoprotein complex assembly;GO:0006139//nucleobase-containing compound metabolic process;GO:0043170//macromolecule metabolic process;GO:0006396//RNA processing;GO:0044271//cellular nitrogen compound biosynthetic process;GO:0044237//cellular metabolic process;GO:0071826//ribonucleoprotein complex subunit organization;GO:0071704//organic substance metabolic process;GO:1901362//or…
XP_014336046	0	310.703	0.001	32.5933	14.9923	1.25e-09	1.07e-07	up	BAG1	BAG family molecular chaperone regulator 1, partial [Bos mutus]	Genetic Information Processing	Folding, sorting and degradation	ko04141//Protein processing in endoplasmic reticulum	K09555	-	-	-
XM_005907558	0	929.207	0.001	32.32	14.9801	1.42e-16	7.05e-14	up	CFAP52	PREDICTED: Bos mutus cilia and flagella associated protein 52 (CFAP52), transcript variant X1, mRNA	-	-	-	-	-	-	-
XP_014333165	0	672.297	0.001	32.21	14.9752	2.79e-18	2.47e-15	up	SF1	Splicing factor 1 [Fukomys damarensis]	-	-	-	-	-	-	-
XP_005910528	0	390.95	0.001	32.0967	14.9701	1.5e-11	2.22e-09	up	SPATA4	PREDICTED: spermatogenesis-associated protein 4 [Bos mutus]	-	-	-	-	-	-	-
XP_005899988	0	382.48	0.001	32.0733	14.9691	1.91e-12	3.54e-10	up	CSNK2A2	PREDICTED: casein kinase II subunit alpha' [Bos mutus]	Cellular Processes;Environmental Information Processing;Genetic Information Processing	Signal transduction;Cellular commiunity;Translation	ko04530//Tight junction;ko04310//Wnt signaling pathway;ko04064//NF-kappa B signaling pathway;ko04520//Adherens junction;ko03008//Ribosome biogenesis in eukaryotes	K03097	GO:0005623//cell;GO:0043227//membrane-bounded organelle;GO:0043231//intracellular membrane-bounded organelle;GO:0032991//macromolecular complex;GO:0043226//organelle;GO:0005622//intracellular;GO:0044424//intracellular part;GO:0044464//cell part;GO:0043229//intracellular organelle;GO:0043234//protein complex	GO:0097367//carbohydrate derivative binding;GO:0016772//transferase activity, transferring phosphorus-containing groups;GO:0005515//protein binding;GO:0001883//purine nucleoside binding;GO:1901363//heterocyclic compound binding;GO:0016740//transferase activity;GO:0004672//protein kinase activity;GO:0016773//phosphotransferase activity, alcohol group as acceptor;GO:0036094//small molecule binding;…	GO:0044267//cellular protein metabolic process;GO:0090304//nucleic acid metabolic process;GO:0007166//cell surface receptor signaling pathway;GO:0070585//protein localization to mitochondrion;GO:0034645//cellular macromolecule biosynthetic process;GO:1901362//organic cyclic compound biosynthetic process;GO:0034613//cellular protein localization;GO:0097659//nucleic acid-templated transcription;GO:…
XM_005904291	0	781.697	0.001	32.0233	14.9668	3.08e-13	6.85e-11	up	SPATA18	PREDICTED: Bos mutus spermatogenesis associated 18 (SPATA18), mRNA	-	-	-	-	GO:0044444//cytoplasmic part;GO:0044446//intracellular organelle part;GO:0005740//mitochondrial envelope;GO:0016020//membrane;GO:0005623//cell;GO:0043229//intracellular organelle;GO:0043231//intracellular membrane-bounded organelle;GO:0031090//organelle membrane;GO:0005622//intracellular;GO:0005739//mitochondrion;GO:0031966//mitochondrial membrane;GO:0044429//mitochondrial part;GO:0031967//organe…	-	GO:0006914//autophagy;GO:0051716//cellular response to stimulus;GO:0007005//mitochondrion organization;GO:0061726//mitochondrion disassembly;GO:0009987//cellular process;GO:0044763//single-organism cellular process;GO:0071840//cellular component organization or biogenesis;GO:0050896//response to stimulus;GO:0006950//response to stress;GO:0033554//cellular response to stress;GO:0022411//cellular c…
XP_014333888	0	354.79	0.001	31.97	14.9644	1.33e-06	4.84e-05	up	SLC25A6	PREDICTED: ADP/ATP translocase 3 [Bos mutus]	Environmental Information Processing	Signal transduction	ko04020//Calcium signaling pathway;ko04022//cGMP - PKG signaling pathway	K05863	-	-	-
XP_005902875	0	569.177	0.001	31.8767	14.9602	2.8e-16	1.25e-13	up	TMEM30A	PREDICTED: LOW QUALITY PROTEIN: cell cycle control protein 50A [Bos mutus]	-	-	-	-	GO:0016020//membrane;GO:0031224//intrinsic component of membrane;GO:0044425//membrane part	-	GO:0051179//localization;GO:0045595//regulation of cell differentiation;GO:0044707//single-multicellular organism process;GO:0048699//generation of neurons;GO:0006886//intracellular protein transport;GO:0048869//cellular developmental process;GO:0010975//regulation of neuron projection development;GO:0051960//regulation of nervous system development;GO:0044765//single-organism transport;GO:190257…
XP_005894230	0	765.273	0.001	31.6633	14.9505	3.23e-18	2.68e-15	up	OSBPL10	PREDICTED: oxysterol-binding protein-related protein 10, partial [Bos mutus]	-	-	-	-	-	-	-
XP_005898305	0	229.613	0.001	31.6233	14.9487	2.95e-09	2.25e-07	up	AMN1	PREDICTED: LOW QUALITY PROTEIN: protein AMN1 homolog [Bos mutus]	-	-	-	-	-	-	-
XM_005911904	0	60.6667	0.001	31.3767	14.9374	6.36e-05	0.00136074	up	LOC102275631	PREDICTED: Bos mutus chromosome unknown open reading frame, human C7orf34 (LOC102275631), mRNA	-	-	-	-	-	-	-
XP_005911966	0	60.6667	0.001	31.3767	14.9374	6.36e-05	0.00136074	up	LOC102275631	Chromosome 7 open reading frame 34 [Homo sapiens]	-	-	-	-	-	-	-
XP_014336437	0	199.663	0.001	31.2833	14.9331	2.88e-08	1.63e-06	up	AIF1	PREDICTED: allograft inflammatory factor 1 isoform X1 [Bos taurus]	-	-	-	-	GO:0005623//cell;GO:0043229//intracellular organelle;GO:0016020//membrane;GO:0005886//plasma membrane;GO:0043232//intracellular non-membrane-bounded organelle;GO:0005856//cytoskeleton;GO:0044424//intracellular part;GO:0044459//plasma membrane part;GO:0044444//cytoplasmic part;GO:0043231//intracellular membrane-bounded organelle;GO:0043226//organelle;GO:0042995//cell projection;GO:0043227//membran…	GO:0046872//metal ion binding;GO:0005488//binding;GO:0043167//ion binding;GO:0003779//actin binding;GO:0043169//cation binding;GO:0005515//protein binding;GO:0008092//cytoskeletal protein binding	GO:0040011//locomotion;GO:0030335//positive regulation of cell migration;GO:0016337//single organismal cell-cell adhesion;GO:0007015//actin filament organization;GO:0000082//G1/S transition of mitotic cell cycle;GO:0045087//innate immune response;GO:0044843//cell cycle G1/S phase transition;GO:0048523//negative regulation of cellular process;GO:0034097//response to cytokine;GO:1902589//single-org…
XP_005911823	0	398.937	0.001	31.2633	14.9322	3.92e-06	0.000123122	up	RBM4B	PREDICTED: LOW QUALITY PROTEIN: RNA binding motif protein 4B [Bos mutus]	-	-	-	-	-	GO:0046914//transition metal ion binding;GO:0046872//metal ion binding;GO:0003723//RNA binding;GO:0043169//cation binding;GO:0005488//binding;GO:0043167//ion binding;GO:0097159//organic cyclic compound binding;GO:1901363//heterocyclic compound binding;GO:0003676//nucleic acid binding	GO:0010467//gene expression;GO:0009058//biosynthetic process;GO:1901564//organonitrogen compound metabolic process;GO:0050896//response to stimulus;GO:0048511//rhythmic process;GO:0006412//translation;GO:0043043//peptide biosynthetic process;GO:0007623//circadian rhythm;GO:0009314//response to radiation;GO:0044271//cellular nitrogen compound biosynthetic process;GO:0044267//cellular protein metab…
XP_005903921	0	391.68	0.001	31.2133	14.9299	3.12e-11	4.2e-09	up	PPP1CB	serine/threonine-protein phosphatase PP1-beta catalytic subunit isoform 1 [Homo sapiens]	Genetic Information Processing;Cellular Processes;Organismal Systems	Translation;Cell motility;Cellular commiunity;Circulatory system;Endocrine system;Cell growth and death	ko04510//Focal adhesion;ko04810//Regulation of actin cytoskeleton;ko04261//Adrenergic signaling in cardiomyocytes;ko04910//Insulin signaling pathway;ko04114//Oocyte meiosis;ko04270//Vascular smooth muscle contraction;ko03015//mRNA surveillance pathway	K06269	GO:0005654//nucleoplasm;GO:0030054//cell junction;GO:0044446//intracellular organelle part;GO:0043233//organelle lumen;GO:0043230//extracellular organelle;GO:0044444//cytoplasmic part;GO:1990234//transferase complex;GO:0043226//organelle;GO:0034708//methyltransferase complex;GO:0005737//cytoplasm;GO:0035097//histone methyltransferase complex;GO:0044464//cell part;GO:0043229//intracellular organel…	GO:0005488//binding;GO:0019900//kinase binding;GO:0003824//catalytic activity;GO:0043169//cation binding;GO:0005515//protein binding;GO:0004721//phosphoprotein phosphatase activity;GO:0004722//protein serine/threonine phosphatase activity;GO:0043167//ion binding;GO:0016791//phosphatase activity;GO:0016788//hydrolase activity, acting on ester bonds;GO:0046983//protein dimerization activity;GO:0019…	GO:0003401//axis elongation;GO:0009653//anatomical structure morphogenesis;GO:0006793//phosphorus metabolic process;GO:1901575//organic substance catabolic process;GO:0048589//developmental growth;GO:0044712//single-organism catabolic process;GO:0009059//macromolecule biosynthetic process;GO:0000272//polysaccharide catabolic process;GO:0044724//single-organism carbohydrate catabolic process;GO:00…
XM_014476942	0	652.333	0.001	31.1667	14.9277	2.37e-12	4.25e-10	up	FAM71D	PREDICTED: Bos mutus family with sequence similarity 71, member D (FAM71D), transcript variant X1, mRNA	-	-	-	-	-	-	-
XP_005904393	0	51.0133	0.001	30.9933	14.9197	0.00222796	0.0244165	up	LOC102276015	PREDICTED: placenta-specific gene 8 protein-like [Bos mutus]	-	-	-	-	-	-	GO:0008152//metabolic process;GO:0044249//cellular biosynthetic process;GO:0046483//heterocycle metabolic process;GO:0009059//macromolecule biosynthetic process;GO:0009605//response to external stimulus;GO:0008283//cell proliferation;GO:0071704//organic substance metabolic process;GO:0044237//cellular metabolic process;GO:0009058//biosynthetic process;GO:0006725//cellular aromatic compound metabo…
XP_005899103	0	841.053	0.001	30.4933	14.8962	7.57e-20	9.99e-17	up	SRP72	PREDICTED: signal recognition particle subunit SRP72 isoform X1 [Bos mutus]	Genetic Information Processing	Folding, sorting and degradation	ko03060//Protein export	K03108	-	-	-
XM_005911157	0	400.777	0.001	30.2733	14.8858	1.14e-10	1.28e-08	up	LOC102270085	PREDICTED: Bos mutus serine protease 58 (LOC102270085), transcript variant X1, mRNA	-	-	-	-	GO:0044424//intracellular part;GO:0005622//intracellular;GO:0043231//intracellular membrane-bounded organelle;GO:0044464//cell part;GO:0005623//cell;GO:0043227//membrane-bounded organelle;GO:0043229//intracellular organelle;GO:0043226//organelle	-	GO:0071704//organic substance metabolic process;GO:0044238//primary metabolic process;GO:0019538//protein metabolic process;GO:0043170//macromolecule metabolic process;GO:0008152//metabolic process
XP_005896975	0	581.2	0.001	30.2533	14.8848	1.87e-14	5.56e-12	up	MEX3C	PREDICTED: RNA-binding E3 ubiquitin-protein ligase MEX3C [Bos mutus]	-	-	-	-	-	GO:0046872//metal ion binding;GO:0003723//RNA binding;GO:0097159//organic cyclic compound binding;GO:0046914//transition metal ion binding;GO:0005488//binding;GO:0003676//nucleic acid binding;GO:0043167//ion binding;GO:0043169//cation binding;GO:1901363//heterocyclic compound binding	GO:0044707//single-multicellular organism process;GO:0045444//fat cell differentiation;GO:0006914//autophagy;GO:0016043//cellular component organization;GO:0030154//cell differentiation;GO:1903008//organelle disassembly;GO:0000423//macromitophagy;GO:0042592//homeostatic process;GO:0007005//mitochondrion organization;GO:0048869//cellular developmental process;GO:0065008//regulation of biological q…
XP_005901049	0	208.527	0.001	30.22	14.8832	2.41e-09	1.88e-07	up	TMED10	PREDICTED: transmembrane emp24 domain-containing protein 10 isoform X1 [Bos mutus]	-	-	-	-	GO:0044459//plasma membrane part;GO:0098797//plasma membrane protein complex;GO:0044464//cell part;GO:0031988//membrane-bounded vesicle;GO:0031090//organelle membrane;GO:0005576//extracellular region;GO:0005886//plasma membrane;GO:0012506//vesicle membrane;GO:0031224//intrinsic component of membrane;GO:0031410//cytoplasmic vesicle;GO:0032991//macromolecular complex;GO:0031982//vesicle;GO:0005798/…	GO:0005515//protein binding;GO:0000149//SNARE binding;GO:0005488//binding	GO:0050435//beta-amyloid metabolic process;GO:0006810//transport;GO:0048193//Golgi vesicle transport;GO:0006518//peptide metabolic process;GO:0051640//organelle localization;GO:0051649//establishment of localization in cell;GO:0006996//organelle organization;GO:0051648//vesicle localization;GO:0008104//protein localization;GO:0006807//nitrogen compound metabolic process;GO:0015031//protein transp…
XP_014337554	0	425.643	0.001	30.1467	14.8797	2.13e-05	0.000532713	up	GAPDH	glyceraldehyde-3-phosphate dehydrogenase [Bos taurus]	Metabolism;Environmental Information Processing	Global and Overview;Signal transduction;Carbohydrate metabolism	ko01200//Carbon metabolism;ko04066//HIF-1 signaling pathway;ko01230//Biosynthesis of amino acids;ko00010//Glycolysis / Gluconeogenesis	K00134	GO:0005635//nuclear envelope;GO:0005634//nucleus;GO:0043227//membrane-bounded organelle;GO:0005576//extracellular region;GO:0044424//intracellular part;GO:0005622//intracellular;GO:0016020//membrane;GO:0043226//organelle;GO:0043232//intracellular non-membrane-bounded organelle;GO:0043229//intracellular organelle;GO:0005623//cell;GO:0043234//protein complex;GO:0031967//organelle envelope;GO:004444…	GO:0016769//transferase activity, transferring nitrogenous groups;GO:0003824//catalytic activity;GO:1901363//heterocyclic compound binding;GO:0097159//organic cyclic compound binding;GO:0043891//glyceraldehyde-3-phosphate dehydrogenase (NAD(P)+) (phosphorylating) activity;GO:0015631//tubulin binding;GO:0005488//binding;GO:0036094//small molecule binding;GO:0016620//oxidoreductase activity, acting…	GO:0008152//metabolic process;GO:0034641//cellular nitrogen compound metabolic process;GO:0018198//peptidyl-cysteine modification;GO:0044237//cellular metabolic process;GO:0044260//cellular macromolecule metabolic process;GO:0006518//peptide metabolic process;GO:0044723//single-organism carbohydrate metabolic process;GO:0009987//cellular process;GO:0006950//response to stress;GO:0044281//small mo…
XP_005902987	0	274.44	0.001	30.06	14.8756	1.1e-10	1.23e-08	up	KDELR2	PREDICTED: ER lumen protein retaining receptor 2 [Pantholops hodgsonii]	-	-	-	-	GO:0043229//intracellular organelle;GO:0005623//cell;GO:0031982//vesicle;GO:0043227//membrane-bounded organelle;GO:0043226//organelle;GO:0016020//membrane;GO:0043230//extracellular organelle;GO:0044464//cell part;GO:0012505//endomembrane system;GO:0044425//membrane part;GO:0043231//intracellular membrane-bounded organelle;GO:0005622//intracellular;GO:1903561//extracellular vesicle;GO:0044424//int…	GO:0005488//binding;GO:0005048//signal sequence binding;GO:0033218//amide binding;GO:0042277//peptide binding	GO:0035437//maintenance of protein localization in endoplasmic reticulum;GO:0044699//single-organism process;GO:0070972//protein localization to endoplasmic reticulum;GO:0006810//transport;GO:0051179//localization;GO:0045185//maintenance of protein location;GO:0065007//biological regulation;GO:0008104//protein localization;GO:1902578//single-organism localization;GO:0051651//maintenance of locati…
XM_005904551	0	215.203	0.001	29.81	14.8635	1.78e-07	8.23e-06	up	SPATA19	PREDICTED: Bos mutus spermatogenesis associated 19 (SPATA19), mRNA	-	-	-	-	GO:0044464//cell part;GO:0044424//intracellular part;GO:0043229//intracellular organelle;GO:0043227//membrane-bounded organelle;GO:0005623//cell;GO:0043226//organelle;GO:0043231//intracellular membrane-bounded organelle;GO:0005622//intracellular	-	GO:0044767//single-organism developmental process;GO:0009987//cellular process;GO:0007276//gamete generation;GO:0032502//developmental process;GO:0019953//sexual reproduction;GO:0044702//single organism reproductive process;GO:0022414//reproductive process;GO:0032504//multicellular organism reproduction;GO:0032501//multicellular organismal process;GO:0000003//reproduction;GO:0044703//multi-organi…
XP_005902029	0	641.723	0.001	29.68	14.8572	2.71e-17	1.63e-14	up	ARFGAP3	PREDICTED: ADP-ribosylation factor GTPase-activating protein 3 isoform X1 [Bos mutus]	Cellular Processes	Transport and catabolism	ko04144//Endocytosis	K12493	GO:0005794//Golgi apparatus;GO:0005622//intracellular;GO:0043231//intracellular membrane-bounded organelle;GO:0043229//intracellular organelle;GO:0044431//Golgi apparatus part;GO:0044422//organelle part;GO:0044446//intracellular organelle part;GO:0005737//cytoplasm;GO:0012505//endomembrane system;GO:0043226//organelle;GO:0005623//cell;GO:0043227//membrane-bounded organelle;GO:0044424//intracellul…	GO:0043169//cation binding;GO:0005488//binding;GO:0043167//ion binding	GO:0008104//protein localization;GO:0033036//macromolecule localization;GO:0006810//transport;GO:0051179//localization;GO:0015031//protein transport;GO:0043087//regulation of GTPase activity;GO:0065007//biological regulation;GO:0051336//regulation of hydrolase activity;GO:0065009//regulation of molecular function;GO:0045184//establishment of protein localization;GO:0071702//organic substance tran…
XP_005890154	0	1091.67	0.001	29.38	14.8425	5.98e-19	6.14e-16	up	HMGCR	PREDICTED: 3-hydroxy-3-methylglutaryl-coenzyme A reductase [Bos mutus]	Environmental Information Processing;Metabolism;Organismal Systems	Metabolism of terpenoids and polyketides;Digestive system;Signal transduction	ko04152//AMPK signaling pathway;ko04976//Bile secretion;ko00900//Terpenoid backbone biosynthesis	K00021	-	-	-
XP_005903536	0	689.87	0.001	29.3467	14.8409	1.43e-18	1.35e-15	up	PICALM	PREDICTED: phosphatidylinositol-binding clathrin assembly protein isoform X4 [Bos mutus]	-	-	-	-	GO:0030666//endocytic vesicle membrane;GO:0005886//plasma membrane;GO:0016020//membrane;GO:0030118//clathrin coat;GO:0044446//intracellular organelle part;GO:0044424//intracellular part;GO:0097708//intracellular vesicle;GO:0030665//clathrin-coated vesicle membrane;GO:0031410//cytoplasmic vesicle;GO:0030139//endocytic vesicle;GO:0016023//cytoplasmic, membrane-bounded vesicle;GO:0030136//clathrin-c…	GO:0005488//binding;GO:0008289//lipid binding;GO:0005543//phospholipid binding;GO:0005515//protein binding;GO:0030276//clathrin binding;GO:0035091//phosphatidylinositol binding	GO:1901360//organic cyclic compound metabolic process;GO:0031323//regulation of cellular metabolic process;GO:0052548//regulation of endopeptidase activity;GO:0051234//establishment of localization;GO:0016070//RNA metabolic process;GO:0080090//regulation of primary metabolic process;GO:0006812//cation transport;GO:0008104//protein localization;GO:0044085//cellular component biogenesis;GO:0044238/…
XP_014332645	0	741.847	0.001	29.1667	14.832	1.29e-16	6.52e-14	up	GGNBP2	PREDICTED: gametogenetin-binding protein 2 isoform X4 [Bubalus bubalis]	-	-	-	-	-	-	-
XM_005902334	0	406.587	0.001	29.1633	14.8319	1.48e-10	1.62e-08	up	SPATC1L	PREDICTED: Bos mutus spermatogenesis and centriole associated 1-like (SPATC1L), transcript variant X1, mRNA	-	-	-	-	-	-	-
XM_005892125	0	1497.59	0.001	29.02	14.8248	9.41e-14	2.35e-11	up	LOC102278420	PREDICTED: Bos mutus uncharacterized LOC102278420 (LOC102278420), mRNA	-	-	-	-	-	-	-
XP_005902903	0	439.13	0.001	28.97	14.8223	2.04e-13	4.76e-11	up	MKRN2	probable E3 ubiquitin-protein ligase makorin-2 [Bos taurus]	-	-	-	-	-	GO:0003676//nucleic acid binding;GO:0097159//organic cyclic compound binding;GO:0005488//binding;GO:0043167//ion binding;GO:0043169//cation binding;GO:0046872//metal ion binding;GO:1901363//heterocyclic compound binding;GO:0046914//transition metal ion binding;GO:0003723//RNA binding	-
XP_005909413	0	417.013	0.001	28.9033	14.8189	3.57e-06	0.000113016	up	PRKAR2A	cAMP-dependent protein kinase type II-alpha regulatory subunit [Bos taurus]	Organismal Systems;Cellular Processes	Cell growth and death;Endocrine system	ko04910//Insulin signaling pathway;ko04210//Apoptosis	K04739	GO:0005912//adherens junction;GO:0070161//anchoring junction;GO:0044421//extracellular region part;GO:0044425//membrane part;GO:0016020//membrane;GO:0005815//microtubule organizing center;GO:0030055//cell-substrate junction;GO:0043230//extracellular organelle;GO:0044422//organelle part;GO:0005622//intracellular;GO:0043227//membrane-bounded organelle;GO:1903561//extracellular vesicle;GO:0043229//i…	GO:0030551//cyclic nucleotide binding;GO:0005515//protein binding;GO:0019207//kinase regulator activity;GO:0098772//molecular function regulator;GO:0030234//enzyme regulator activity;GO:0044389//ubiquitin-like protein ligase binding;GO:0030291//protein serine/threonine kinase inhibitor activity;GO:1901265//nucleoside phosphate binding;GO:0019887//protein kinase regulator activity;GO:0005488//bind…	GO:0032268//regulation of cellular protein metabolic process;GO:0080090//regulation of primary metabolic process;GO:0001933//negative regulation of protein phosphorylation;GO:0031323//regulation of cellular metabolic process;GO:0010563//negative regulation of phosphorus metabolic process;GO:0043549//regulation of kinase activity;GO:0051348//negative regulation of transferase activity;GO:0045936//…
XP_005889122	0	116.4	0.001	28.6767	14.8076	4.14e-07	1.72e-05	up	NDUFAF2	PREDICTED: mimitin, mitochondrial [Bos mutus]	-	-	-	-	-	-	-
XP_014332284	0	1259.23	0.001	28.6067	14.8041	1.63e-23	9.06e-20	up	CTNND1	PREDICTED: catenin delta-1 [Bos mutus]	Environmental Information Processing;Cellular Processes;Organismal Systems	Signal transduction;Cellular commiunity;Immune system	ko04015//Rap1 signaling pathway;ko04670//Leukocyte transendothelial migration;ko04520//Adherens junction	K05690	GO:0044421//extracellular region part;GO:0005623//cell;GO:0005576//extracellular region;GO:0044464//cell part;GO:0043231//intracellular membrane-bounded organelle;GO:0043226//organelle;GO:0005622//intracellular;GO:1903561//extracellular vesicle;GO:0031982//vesicle;GO:0005737//cytoplasm;GO:0043227//membrane-bounded organelle;GO:0044424//intracellular part;GO:0044425//membrane part;GO:0016020//memb…	GO:0043167//ion binding;GO:0046914//transition metal ion binding;GO:0016409//palmitoyltransferase activity;GO:0046872//metal ion binding;GO:0003824//catalytic activity;GO:0016746//transferase activity, transferring acyl groups;GO:0016740//transferase activity;GO:0005515//protein binding;GO:0016747//transferase activity, transferring acyl groups other than amino-acyl groups;GO:0005488//binding;GO:…	GO:0010648//negative regulation of cell communication;GO:0050794//regulation of cellular process;GO:0030178//negative regulation of Wnt signaling pathway;GO:0022610//biological adhesion;GO:0030111//regulation of Wnt signaling pathway;GO:0065007//biological regulation;GO:0048585//negative regulation of response to stimulus;GO:0007155//cell adhesion;GO:0048519//negative regulation of biological pro…
XP_005896423	0	494.313	0.001	28.2667	14.7868	8.45e-13	1.67e-10	up	NUP50	PREDICTED: nuclear pore complex protein Nup50 [Bos mutus]	Genetic Information Processing	Translation	ko03013//RNA transport	K14295	-	-	-
XP_005898538	0	209.8	0.001	28.2333	14.7851	1.75e-09	1.42e-07	up	REEP3	PREDICTED: receptor expression-enhancing protein 3 [Bos mutus]	-	-	-	-	GO:0031224//intrinsic component of membrane;GO:0016020//membrane;GO:0044425//membrane part	-	GO:0006997//nucleus organization;GO:0016043//cellular component organization;GO:0044699//single-organism process;GO:0071840//cellular component organization or biogenesis;GO:0007049//cell cycle;GO:0009987//cellular process;GO:0000278//mitotic cell cycle;GO:0006996//organelle organization;GO:0044763//single-organism cellular process
XP_005909417	0	529.263	0.001	27.7367	14.7595	2.72e-14	7.7e-12	up	ARIH2	E3 ubiquitin-protein ligase ARIH2 [Bos taurus]	-	-	-	-	-	-	-
XP_005909418	0	529.263	0.001	27.7367	14.7595	2.72e-14	7.7e-12	up	ARIH2	E3 ubiquitin-protein ligase ARIH2 [Bos taurus]	-	-	-	-	-	-	-
XP_005887816	0	1303.56	0.001	27.63	14.7539	4.4e-18	3.44e-15	up	TEX2	PREDICTED: testis-expressed sequence 2 protein [Bos mutus]	-	-	-	-	GO:0044425//membrane part;GO:0031224//intrinsic component of membrane;GO:0016020//membrane	-	-
XM_005909424	0	339.333	0.001	27.51	14.7477	3.41e-09	2.57e-07	up	DNAJB7	PREDICTED: Bos mutus DnaJ (Hsp40) homolog, subfamily B, member 7 (DNAJB7), mRNA	-	-	-	-	-	-	-
XP_005893800	0	863.873	0.001	27.4567	14.7449	1.15e-19	1.42e-16	up	PJA2	PREDICTED: E3 ubiquitin-protein ligase Praja-2-like [Bos mutus]	-	-	-	-	-	-	-
XP_005900939	0	502.047	0.001	27.4433	14.7442	7.95e-15	2.59e-12	up	PTDSS1	PREDICTED: phosphatidylserine synthase 1 [Bos mutus]	Metabolism	Lipid metabolism	ko00564//Glycerophospholipid metabolism	K08729	-	-	-
XP_014338005	0	567.227	0.001	27.36	14.7398	3.1e-15	1.11e-12	up	DPH7	PREDICTED: diphthamide biosynthesis protein 7 [Bos taurus]	-	-	-	-	-	-	-
XP_005894086	0	1085.19	0.001	27.2267	14.7327	1.02e-20	1.76e-17	up	SF3B2	PREDICTED: LOW QUALITY PROTEIN: splicing factor 3B subunit 2 [Bos mutus]	Genetic Information Processing	Transcription	ko03040//Spliceosome	K12829	-	-	-
XP_005909794	0	460.59	0.001	27.1167	14.7269	1.2e-14	3.73e-12	up	IFT52	intraflagellar transport protein 52 homolog [Bos taurus]	-	-	-	-	GO:0044464//cell part;GO:0036477//somatodendritic compartment;GO:0030990//intraciliary transport particle;GO:0005815//microtubule organizing center;GO:0005813//centrosome;GO:0005929//cilium;GO:0043005//neuron projection;GO:0043234//protein complex;GO:0030425//dendrite;GO:0005623//cell;GO:0072372//primary cilium;GO:0032991//macromolecular complex;GO:0044446//intracellular organelle part;GO:0043229…	-	GO:0072359//circulatory system development;GO:0048513//animal organ development;GO:0050896//response to stimulus;GO:0003143//embryonic heart tube morphogenesis;GO:0009799//specification of symmetry;GO:0019538//protein metabolic process;GO:0048562//embryonic organ morphogenesis;GO:0032502//developmental process;GO:0044238//primary metabolic process;GO:0048729//tissue morphogenesis;GO:0003007//hear…
XM_014483389	0	345.333	0.001	26.64	14.7013	3.38e-09	2.54e-07	up	PAQR5	PREDICTED: Bos mutus progestin and adipoQ receptor family member V (PAQR5), mRNA	-	-	-	-	GO:0031224//intrinsic component of membrane;GO:0016020//membrane;GO:0044425//membrane part	-	GO:0044763//single-organism cellular process;GO:0070887//cellular response to chemical stimulus;GO:0023052//signaling;GO:0065007//biological regulation;GO:0071495//cellular response to endogenous stimulus;GO:0007165//signal transduction;GO:0044699//single-organism process;GO:0050789//regulation of biological process;GO:0009987//cellular process;GO:0010033//response to organic substance;GO:0009719…
XP_005888909	0	360.99	0.001	26.5733	14.6977	5.01e-11	6.27e-09	up	GNB1	guanine nucleotide-binding protein G(I)/G(S)/G(T) subunit beta-1 [Mus musculus]	Organismal Systems;Environmental Information Processing	Immune system;Environmental adaptation;Sensory system;Signal transduction;Nervous system	ko04151//PI3K-Akt signaling pathway;ko04014//Ras signaling pathway;ko04062//Chemokine signaling pathway;ko04728//Dopaminergic synapse;ko04724//Glutamatergic synapse;ko04726//Serotonergic synapse;ko04723//Retrograde endocannabinoid signaling;ko04713//Circadian entrainment;ko04725//Cholinergic synapse;ko04727//GABAergic synapse;ko04742//Taste transduction;ko04744//Phototransduction	K04536	GO:0044424//intracellular part;GO:0005623//cell;GO:0019897//extrinsic component of plasma membrane;GO:0043005//neuron projection;GO:0005886//plasma membrane;GO:0043230//extracellular organelle;GO:0001750//photoreceptor outer segment;GO:0098552//side of membrane;GO:0072372//primary cilium;GO:0097458//neuron part;GO:0005773//vacuole;GO:0005576//extracellular region;GO:0044464//cell part;GO:0009898/…	GO:0016787//hydrolase activity;GO:0001664//G-protein coupled receptor binding;GO:0042578//phosphoric ester hydrolase activity;GO:0016817//hydrolase activity, acting on acid anhydrides;GO:0016788//hydrolase activity, acting on ester bonds;GO:0008081//phosphoric diester hydrolase activity;GO:0016462//pyrophosphatase activity;GO:0019899//enzyme binding;GO:0016818//hydrolase activity, acting on acid …	GO:0006874//cellular calcium ion homeostasis;GO:1901700//response to oxygen-containing compound;GO:0034694//response to prostaglandin;GO:0036293//response to decreased oxygen levels;GO:0006950//response to stress;GO:0048856//anatomical structure development;GO:0044085//cellular component biogenesis;GO:0008277//regulation of G-protein coupled receptor protein signaling pathway;GO:0048583//regulati…
XP_005888910	0	360.99	0.001	26.5733	14.6977	5.02e-11	6.27e-09	up	GNB1	guanine nucleotide-binding protein G(I)/G(S)/G(T) subunit beta-1 [Mus musculus]	Organismal Systems;Environmental Information Processing	Immune system;Nervous system;Signal transduction;Sensory system;Environmental adaptation	ko04151//PI3K-Akt signaling pathway;ko04014//Ras signaling pathway;ko04062//Chemokine signaling pathway;ko04728//Dopaminergic synapse;ko04724//Glutamatergic synapse;ko04726//Serotonergic synapse;ko04723//Retrograde endocannabinoid signaling;ko04713//Circadian entrainment;ko04725//Cholinergic synapse;ko04727//GABAergic synapse;ko04742//Taste transduction;ko04744//Phototransduction	K04536	GO:0071944//cell periphery;GO:0072372//primary cilium;GO:0005886//plasma membrane;GO:0043230//extracellular organelle;GO:0097458//neuron part;GO:0019897//extrinsic component of plasma membrane;GO:0044459//plasma membrane part;GO:0005929//cilium;GO:0043005//neuron projection;GO:0043231//intracellular membrane-bounded organelle;GO:0005773//vacuole;GO:0044425//membrane part;GO:0000323//lytic vacuole…	GO:0042578//phosphoric ester hydrolase activity;GO:0005102//receptor binding;GO:0019899//enzyme binding;GO:0016817//hydrolase activity, acting on acid anhydrides;GO:0016462//pyrophosphatase activity;GO:0016818//hydrolase activity, acting on acid anhydrides, in phosphorus-containing anhydrides;GO:0005488//binding;GO:0031701//angiotensin receptor binding;GO:0003824//catalytic activity;GO:0016788//h…	GO:1901700//response to oxygen-containing compound;GO:0044699//single-organism process;GO:0051291//protein heterooligomerization;GO:0009719//response to endogenous stimulus;GO:0072507//divalent inorganic cation homeostasis;GO:0009725//response to hormone;GO:0050896//response to stimulus;GO:0050789//regulation of biological process;GO:0051716//cellular response to stimulus;GO:0072503//cellular div…
XP_005888230	0	1502.47	0.001	26.5367	14.6957	7.32e-23	2.9e-19	up	SYNRG	PREDICTED: LOW QUALITY PROTEIN: synergin gamma [Bos mutus]	-	-	-	-	-	-	-
XP_014333912	0	261.643	0.001	26.46	14.6915	2.57e-10	2.66e-08	up	TMBIM6	PREDICTED: LOW QUALITY PROTEIN: bax inhibitor 1 [Orycteropus afer afer]	-	-	-	-	GO:0005739//mitochondrion;GO:0042175//nuclear outer membrane-endoplasmic reticulum membrane network;GO:0031967//organelle envelope;GO:0044424//intracellular part;GO:0071944//cell periphery;GO:0043229//intracellular organelle;GO:0005737//cytoplasm;GO:0043227//membrane-bounded organelle;GO:0044446//intracellular organelle part;GO:0016020//membrane;GO:0005622//intracellular;GO:0044425//membrane part…	GO:0008428//ribonuclease inhibitor activity;GO:0044389//ubiquitin-like protein ligase binding;GO:0005515//protein binding;GO:0098772//molecular function regulator;GO:0005488//binding;GO:0004857//enzyme inhibitor activity;GO:0030234//enzyme regulator activity;GO:0019899//enzyme binding	GO:0055074//calcium ion homeostasis;GO:0051171//regulation of nitrogen compound metabolic process;GO:0006950//response to stress;GO:0006915//apoptotic process;GO:0045934//negative regulation of nucleobase-containing compound metabolic process;GO:0065007//biological regulation;GO:0072503//cellular divalent inorganic cation homeostasis;GO:0043066//negative regulation of apoptotic process;GO:0008219…
XP_005909104	0	135.213	0.001	26.45	14.691	1.23e-07	5.95e-06	up	RAP1B	ras-related protein Rap-1b isoform 1 precursor [Homo sapiens]	Environmental Information Processing;Cellular Processes	Signal transduction;Cellular commiunity	ko04010//MAPK signaling pathway;ko04510//Focal adhesion	K07836	GO:0005576//extracellular region;GO:0044444//cytoplasmic part;GO:0043226//organelle;GO:0043230//extracellular organelle;GO:0043232//intracellular non-membrane-bounded organelle;GO:0044464//cell part;GO:0044425//membrane part;GO:0031982//vesicle;GO:0098589//membrane region;GO:0043228//non-membrane-bounded organelle;GO:0098857//membrane microdomain;GO:0016020//membrane;GO:0005737//cytoplasm;GO:0043…	GO:0036094//small molecule binding;GO:0097367//carbohydrate derivative binding;GO:1901363//heterocyclic compound binding;GO:0016787//hydrolase activity;GO:0017111//nucleoside-triphosphatase activity;GO:0097159//organic cyclic compound binding;GO:0003824//catalytic activity;GO:0016818//hydrolase activity, acting on acid anhydrides, in phosphorus-containing anhydrides;GO:0016817//hydrolase activity…	GO:0051591//response to cAMP;GO:0031325//positive regulation of cellular metabolic process;GO:0002064//epithelial cell development;GO:0010243//response to organonitrogen compound;GO:0007165//signal transduction;GO:0099531//presynaptic process involved in chemical synaptic transmission;GO:0098916//anterograde trans-synaptic signaling;GO:0065008//regulation of biological quality;GO:0099003//vesicle…
XP_005911568	0	97.3933	0.001	26.41	14.6888	2.45e-06	8.22e-05	up	UBD	PREDICTED: ubiquitin D-like [Bos mutus]	-	-	-	-	-	-	-
XM_005900439	0	274.667	0.001	26.3567	14.6859	4.87e-09	3.51e-07	up	LOC102267708	PREDICTED: Bos mutus chromosome unknown open reading frame, human C20orf173 (LOC102267708), mRNA	-	-	-	-	-	-	-
XP_005899232	0	221.45	0.001	26.3	14.6828	5.71e-07	2.29e-05	up	PSME3	PREDICTED: proteasome activator complex subunit 3 isoform X1 [Felis catus]	Organismal Systems;Genetic Information Processing	Folding, sorting and degradation;Immune system	ko04612//Antigen processing and presentation;ko03050//Proteasome	K06698	-	-	-
XP_005906268	0	155.75	0.001	26.23	14.6789	3.76e-08	2.07e-06	up	MARCKSL1	MARCKS-related protein [Bos taurus]	Organismal Systems	Immune system	ko04666//Fc gamma R-mediated phagocytosis	K13536	GO:0044424//intracellular part;GO:0031982//vesicle;GO:0016020//membrane;GO:0005623//cell;GO:0044464//cell part;GO:1903561//extracellular vesicle;GO:0043226//organelle;GO:0005622//intracellular;GO:0044421//extracellular region part;GO:0043230//extracellular organelle;GO:0043227//membrane-bounded organelle;GO:0005576//extracellular region	GO:0008092//cytoskeletal protein binding;GO:0005515//protein binding;GO:0005488//binding	GO:0044699//single-organism process;GO:0008283//cell proliferation
XP_005902027	0	386.933	0.001	26.17	14.6756	3.17e-13	7.01e-11	up	POLDIP3	PREDICTED: polymerase delta-interacting protein 3 isoform X1 [Bos taurus]	-	-	-	-	GO:0044464//cell part;GO:0005623//cell	GO:0005488//binding;GO:0097159//organic cyclic compound binding	GO:0015931//nucleobase-containing compound transport;GO:0051028//mRNA transport;GO:0051234//establishment of localization;GO:0008152//metabolic process;GO:0071166//ribonucleoprotein complex localization;GO:0006403//RNA localization;GO:0033036//macromolecule localization;GO:0010467//gene expression;GO:0051179//localization;GO:0046907//intracellular transport;GO:0051649//establishment of localizati…
XP_005899431	0	361.34	0.001	26.0167	14.6671	4.26e-12	7.17e-10	up	ATP6V1C1	V-type proton ATPase subunit C 1 [Bos taurus]	Metabolism;Organismal Systems;Cellular Processes	Excretory system;Energy metabolism;Transport and catabolism;Nervous system	ko04145//Phagosome;ko00190//Oxidative phosphorylation;ko04721//Synaptic vesicle cycle;ko04966//Collecting duct acid secretion	K02148	GO:0098796//membrane protein complex;GO:0043234//protein complex;GO:0044421//extracellular region part;GO:0016020//membrane;GO:0043226//organelle;GO:0044425//membrane part;GO:0043230//extracellular organelle;GO:0016469//proton-transporting two-sector ATPase complex;GO:0043227//membrane-bounded organelle;GO:0005576//extracellular region;GO:0033176//proton-transporting V-type ATPase complex;GO:0032…	GO:0022892//substrate-specific transporter activity;GO:0003824//catalytic activity;GO:0005215//transporter activity;GO:0016818//hydrolase activity, acting on acid anhydrides, in phosphorus-containing anhydrides;GO:0016887//ATPase activity;GO:0022804//active transmembrane transporter activity;GO:0022890//inorganic cation transmembrane transporter activity;GO:0016462//pyrophosphatase activity;GO:00…	GO:0006818//hydrogen transport;GO:0098662//inorganic cation transmembrane transport;GO:0051234//establishment of localization;GO:0006811//ion transport;GO:1902578//single-organism localization;GO:1902600//hydrogen ion transmembrane transport;GO:0044765//single-organism transport;GO:0051179//localization;GO:0015988//energy coupled proton transmembrane transport, against electrochemical gradient;GO…
XP_005895958	0	712.697	0.001	25.6833	14.6485	4.95e-16	2.1e-13	up	WDTC1	WD and tetratricopeptide repeats protein 1 [Bos taurus]	-	-	-	-	GO:0043229//intracellular organelle;GO:0043227//membrane-bounded organelle;GO:0044464//cell part;GO:0043231//intracellular membrane-bounded organelle;GO:0005622//intracellular;GO:0044444//cytoplasmic part;GO:0043226//organelle;GO:0044424//intracellular part;GO:0005737//cytoplasm;GO:0005623//cell	GO:0030234//enzyme regulator activity;GO:0098772//molecular function regulator;GO:0005488//binding;GO:0005515//protein binding;GO:0019899//enzyme binding	GO:0007275//multicellular organism development;GO:0044283//small molecule biosynthetic process;GO:0065009//regulation of molecular function;GO:0044711//single-organism biosynthetic process;GO:0044249//cellular biosynthetic process;GO:0046394//carboxylic acid biosynthetic process;GO:0044763//single-organism cellular process;GO:0090066//regulation of anatomical structure size;GO:0016053//organic ac…
XP_005904543	0	261.85	0.001	25.61	14.6444	5.79e-10	5.46e-08	up	FYTTD1	UAP56-interacting factor, partial [Bos mutus]	-	-	-	-	GO:0005623//cell;GO:0044428//nuclear part;GO:0031981//nuclear lumen;GO:0005634//nucleus;GO:0044424//intracellular part;GO:0070013//intracellular organelle lumen;GO:0044464//cell part;GO:0043227//membrane-bounded organelle;GO:0043226//organelle;GO:0043229//intracellular organelle;GO:0005654//nucleoplasm;GO:0016604//nuclear body;GO:0043233//organelle lumen;GO:0044422//organelle part;GO:0043231//int…	GO:1901363//heterocyclic compound binding;GO:0003723//RNA binding;GO:0005488//binding;GO:0003676//nucleic acid binding;GO:0097159//organic cyclic compound binding	GO:0071705//nitrogen compound transport;GO:0050657//nucleic acid transport;GO:0006403//RNA localization;GO:0051169//nuclear transport;GO:0071702//organic substance transport;GO:0051236//establishment of RNA localization;GO:0050658//RNA transport;GO:0006810//transport;GO:0033036//macromolecule localization;GO:0015931//nucleobase-containing compound transport;GO:0051179//localization;GO:0006405//RN…
XP_014334389	0	285.75	0.001	25.5967	14.6437	2.41e-11	3.32e-09	up	WDR82	WD repeat-containing protein 82, partial [Bos mutus]	Genetic Information Processing	Translation	ko03015//mRNA surveillance pathway	K14962	GO:0035097//histone methyltransferase complex;GO:0043233//organelle lumen;GO:0044446//intracellular organelle part;GO:0043229//intracellular organelle;GO:0044428//nuclear part;GO:0005654//nucleoplasm;GO:0044424//intracellular part;GO:1990234//transferase complex;GO:0005634//nucleus;GO:0043231//intracellular membrane-bounded organelle;GO:0044451//nucleoplasm part;GO:0032991//macromolecular complex…	GO:0044877//macromolecular complex binding;GO:0008276//protein methyltransferase activity;GO:0016740//transferase activity;GO:0016741//transferase activity, transferring one-carbon groups;GO:0042054//histone methyltransferase activity;GO:0008170//N-methyltransferase activity;GO:0016279//protein-lysine N-methyltransferase activity;GO:0005488//binding;GO:0018024//histone-lysine N-methyltransferase …	GO:0043414//macromolecule methylation;GO:0071840//cellular component organization or biogenesis;GO:0009987//cellular process;GO:0044267//cellular protein metabolic process;GO:0018205//peptidyl-lysine modification;GO:0006325//chromatin organization;GO:0006479//protein methylation;GO:0043412//macromolecule modification;GO:0036211//protein modification process;GO:0044260//cellular macromolecule meta…
XP_005905697	0	827.883	0.001	25.5133	14.639	2.71e-16	1.22e-13	up	CCPG1	PREDICTED: cell cycle progression protein 1 isoform X1 [Bos mutus]	-	-	-	-	GO:0044425//membrane part;GO:0031224//intrinsic component of membrane;GO:0016020//membrane	-	GO:0051098//regulation of binding;GO:0050794//regulation of cellular process;GO:0051336//regulation of hydrolase activity;GO:0009058//biosynthetic process;GO:0097659//nucleic acid-templated transcription;GO:0065007//biological regulation;GO:0044271//cellular nitrogen compound biosynthetic process;GO:1905097//regulation of guanyl-nucleotide exchange factor activity;GO:0050789//regulation of biolog…
XP_005893244	0	486.267	0.001	25.41	14.6331	3.71e-15	1.29e-12	up	NGLY1	PREDICTED: peptide-N(4)-(N-acetyl-beta-glucosaminyl)asparagine amidase [Bos mutus]	Genetic Information Processing	Folding, sorting and degradation	ko04141//Protein processing in endoplasmic reticulum	K01456	-	-	GO:0008152//metabolic process;GO:0071704//organic substance metabolic process;GO:0044237//cellular metabolic process;GO:0009100//glycoprotein metabolic process;GO:0043170//macromolecule metabolic process;GO:1901135//carbohydrate derivative metabolic process;GO:0044260//cellular macromolecule metabolic process;GO:0009987//cellular process
XP_005909374	0	504.883	0.001	25.3167	14.6278	1.31e-13	3.14e-11	up	CFAP97	PREDICTED: UPF0501 protein KIAA1430 homolog isoform X1 [Bos mutus]	-	-	-	-	-	-	-
XP_014334141	0	1307.72	0.001	25.0133	14.6104	8.39e-22	1.72e-18	up	SIK3	PREDICTED: serine/threonine-protein kinase SIK3 [Bos mutus]	-	-	-	-	-	GO:0005488//binding;GO:1901363//heterocyclic compound binding;GO:0032549//ribonucleoside binding;GO:0032550//purine ribonucleoside binding;GO:0001883//purine nucleoside binding;GO:0097159//organic cyclic compound binding;GO:0097367//carbohydrate derivative binding;GO:0001882//nucleoside binding;GO:0036094//small molecule binding	GO:0008152//metabolic process;GO:0036211//protein modification process;GO:0009987//cellular process;GO:0019538//protein metabolic process;GO:0043412//macromolecule modification;GO:0071704//organic substance metabolic process;GO:0006464//cellular protein modification process;GO:0043170//macromolecule metabolic process;GO:0044267//cellular protein metabolic process;GO:0044260//cellular macromolecul…
XM_005896538	0	315.333	0.001	24.8367	14.6002	4.48e-10	4.32e-08	up	LOC102267138	PREDICTED: Bos mutus chromosome unknown open reading frame, human C16orf86 (LOC102267138), mRNA	-	-	-	-	-	-	-
XP_005894889	0	128.257	0.001	24.5967	14.5862	2.73e-06	9.05e-05	up	RPL26	PREDICTED: 60S ribosomal protein L26 [Bison bison bison]	Genetic Information Processing	Translation	ko03010//Ribosome	K02898	-	-	-
XP_005904701	0	76.7833	0.001	24.56	14.584	9.48e-06	0.000267367	up	TEX29	PREDICTED: testis-expressed sequence 29 protein [Bos mutus]	-	-	-	-	GO:0016020//membrane;GO:0044425//membrane part;GO:0031224//intrinsic component of membrane	-	-
Unigene030207	0	5.33333	0.001	24.4033	14.5748	0.0268958	0.155448	no	Unigene030207	PREDICTED: inactive serine/threonine-protein kinase TEX14-like isoform X1 [Bubalus bubalis]	-	-	-	-	-	-	-
XM_005900630	0	259.667	0.001	24.2533	14.5659	7.16e-09	4.98e-07	up	FAM170B	PREDICTED: Bos mutus family with sequence similarity 170, member B (FAM170B), mRNA	-	-	-	-	GO:0005737//cytoplasm;GO:0044424//intracellular part;GO:0005622//intracellular;GO:0097708//intracellular vesicle;GO:0098588//bounding membrane of organelle;GO:0044422//organelle part;GO:0016020//membrane;GO:0043231//intracellular membrane-bounded organelle;GO:0098805//whole membrane;GO:0005623//cell;GO:0030667//secretory granule membrane;GO:0044444//cytoplasmic part;GO:0031982//vesicle;GO:0044433…	-	GO:0000003//reproduction;GO:0007340//acrosome reaction;GO:0044703//multi-organism reproductive process;GO:0051704//multi-organism process;GO:0007338//single fertilization;GO:0019953//sexual reproduction;GO:0044702//single organism reproductive process;GO:0009566//fertilization;GO:0044699//single-organism process;GO:0022414//reproductive process
XP_005910198	0	1427.03	0.001	24.2233	14.5641	5.36e-25	4.25e-21	up	DHX9	PREDICTED: ATP-dependent RNA helicase A [Bos mutus]	-	-	-	-	-	-	-
XM_014477950	0	199.73	0.001	24.21	14.5633	7.22e-08	3.7e-06	up	RPL26	PREDICTED: Bos mutus ribosomal protein L26 (RPL26), transcript variant X3, mRNA	Genetic Information Processing	Translation	ko03010//Ribosome	K02898	-	-	-
XM_005901537	0	671.37	0.001	24.1367	14.5589	3.18e-14	8.81e-12	up	PPP2R1B	PREDICTED: Bos mutus protein phosphatase 2, regulatory subunit A, beta (PPP2R1B), transcript variant X1, mRNA	Cellular Processes;Organismal Systems;Environmental Information Processing;Genetic Information Processing	Cell growth and death;Circulatory system;Nervous system;Signal transduction;Cellular commiunity;Translation	ko04151//PI3K-Akt signaling pathway;ko04261//Adrenergic signaling in cardiomyocytes;ko04390//Hippo signaling pathway;ko04728//Dopaminergic synapse;ko04530//Tight junction;ko04152//AMPK signaling pathway;ko04114//Oocyte meiosis;ko04071//Sphingolipid signaling pathway;ko03015//mRNA surveillance pathway;ko04350//TGF-beta signaling pathway;ko04730//Long-term depression	K03456	GO:0016020//membrane;GO:0043230//extracellular organelle;GO:0098805//whole membrane;GO:0044421//extracellular region part;GO:0005576//extracellular region;GO:0043226//organelle;GO:0044425//membrane part;GO:1903561//extracellular vesicle;GO:0098589//membrane region;GO:0098857//membrane microdomain;GO:0031982//vesicle;GO:0043227//membrane-bounded organelle	GO:0098772//molecular function regulator;GO:0019888//protein phosphatase regulator activity;GO:0019208//phosphatase regulator activity;GO:0030234//enzyme regulator activity	GO:0065009//regulation of molecular function;GO:0043933//macromolecular complex subunit organization;GO:0009987//cellular process;GO:0043666//regulation of phosphoprotein phosphatase activity;GO:0007165//signal transduction;GO:0051716//cellular response to stimulus;GO:0044085//cellular component biogenesis;GO:0051336//regulation of hydrolase activity;GO:0008219//cell death;GO:0012501//programmed …
XP_005905989	0	425.51	0.001	23.9467	14.5475	4.38e-14	1.18e-11	up	HNRNPH1	heterogeneous nuclear ribonucleoprotein H [Homo sapiens]	-	-	-	-	GO:0005681//spliceosomal complex;GO:0005622//intracellular;GO:0044428//nuclear part;GO:0043231//intracellular membrane-bounded organelle;GO:0043233//organelle lumen;GO:0043226//organelle;GO:0032991//macromolecular complex;GO:0044464//cell part;GO:0005634//nucleus;GO:0031981//nuclear lumen;GO:0043227//membrane-bounded organelle;GO:0030529//intracellular ribonucleoprotein complex;GO:0031974//membra…	GO:0008187//poly-pyrimidine tract binding;GO:0097159//organic cyclic compound binding;GO:0003723//RNA binding;GO:0003727//single-stranded RNA binding;GO:0005488//binding;GO:1901363//heterocyclic compound binding;GO:0003676//nucleic acid binding	GO:0000375//RNA splicing, via transesterification reactions;GO:0046483//heterocycle metabolic process;GO:0010467//gene expression;GO:0007165//signal transduction;GO:0008152//metabolic process;GO:0090304//nucleic acid metabolic process;GO:0006139//nucleobase-containing compound metabolic process;GO:0050794//regulation of cellular process;GO:0000377//RNA splicing, via transesterification reactions …
XP_014336989	0	425.51	0.001	23.9467	14.5475	4.38e-14	1.18e-11	up	HNRNPH1	heterogeneous nuclear ribonucleoprotein H [Homo sapiens]	-	-	-	-	GO:0043229//intracellular organelle;GO:0044464//cell part;GO:0005622//intracellular;GO:0005681//spliceosomal complex;GO:0043231//intracellular membrane-bounded organelle;GO:1990904//ribonucleoprotein complex;GO:0070013//intracellular organelle lumen;GO:0044424//intracellular part;GO:0005623//cell;GO:0043227//membrane-bounded organelle;GO:0043226//organelle;GO:0043233//organelle lumen;GO:0005634//…	GO:0003676//nucleic acid binding;GO:0003727//single-stranded RNA binding;GO:0008187//poly-pyrimidine tract binding;GO:0005488//binding;GO:0097159//organic cyclic compound binding;GO:1901363//heterocyclic compound binding;GO:0003723//RNA binding	GO:0044700//single organism signaling;GO:0007154//cell communication;GO:0090304//nucleic acid metabolic process;GO:0050896//response to stimulus;GO:0007167//enzyme linked receptor protein signaling pathway;GO:0000377//RNA splicing, via transesterification reactions with bulged adenosine as nucleophile;GO:0010467//gene expression;GO:0044238//primary metabolic process;GO:0044699//single-organism pr…
XP_005895889	0	550.897	0.001	23.84	14.5411	1.13e-14	3.53e-12	up	ELF2	PREDICTED: ETS-related transcription factor Elf-2 isoform X1 [Bos mutus]	-	-	-	-	-	-	-
XP_005889285	0	794.917	0.001	23.8233	14.5401	2.95e-18	2.55e-15	up	SLC39A6	PREDICTED: zinc transporter ZIP6 isoform X1 [Bos taurus]	-	-	-	-	GO:0031224//intrinsic component of membrane;GO:0005623//cell;GO:0044425//membrane part;GO:0043229//intracellular organelle;GO:0016020//membrane;GO:0030027//lamellipodium;GO:0044464//cell part;GO:0005886//plasma membrane;GO:0043231//intracellular membrane-bounded organelle;GO:0071944//cell periphery;GO:0031252//cell leading edge;GO:0005622//intracellular;GO:0042995//cell projection;GO:0043226//org…	GO:0022891//substrate-specific transmembrane transporter activity;GO:0022890//inorganic cation transmembrane transporter activity;GO:0022857//transmembrane transporter activity;GO:0046873//metal ion transmembrane transporter activity;GO:0005215//transporter activity;GO:0046915//transition metal ion transmembrane transporter activity;GO:0015075//ion transmembrane transporter activity;GO:0022892//s…	GO:0065007//biological regulation;GO:0055082//cellular chemical homeostasis;GO:0000041//transition metal ion transport;GO:0072507//divalent inorganic cation homeostasis;GO:0051179//localization;GO:0055085//transmembrane transport;GO:0034220//ion transmembrane transport;GO:0044699//single-organism process;GO:0098771//inorganic ion homeostasis;GO:0098660//inorganic ion transmembrane transport;GO:00…
XP_005893774	0	469.243	0.001	23.7967	14.5385	3.51e-14	9.68e-12	up	WARS	PREDICTED: tryptophan--tRNA ligase, cytoplasmic [Bos mutus]	Genetic Information Processing	Translation	ko00970//Aminoacyl-tRNA biosynthesis	K01867	GO:0005576//extracellular region;GO:0043230//extracellular organelle;GO:0044421//extracellular region part;GO:0031982//vesicle;GO:0043231//intracellular membrane-bounded organelle;GO:0005623//cell;GO:0005622//intracellular;GO:0043227//membrane-bounded organelle;GO:0044424//intracellular part;GO:0043229//intracellular organelle;GO:1903561//extracellular vesicle;GO:0044464//cell part;GO:0043226//or…	GO:1901363//heterocyclic compound binding;GO:0097159//organic cyclic compound binding;GO:0097367//carbohydrate derivative binding;GO:0016874//ligase activity;GO:0004812//aminoacyl-tRNA ligase activity;GO:0032549//ribonucleoside binding;GO:0032550//purine ribonucleoside binding;GO:0016876//ligase activity, forming aminoacyl-tRNA and related compounds;GO:0016875//ligase activity, forming carbon-oxy…	GO:0016070//RNA metabolic process;GO:0044267//cellular protein metabolic process;GO:0048731//system development;GO:0072358//cardiovascular system development;GO:0044281//small molecule metabolic process;GO:0048646//anatomical structure formation involved in morphogenesis;GO:0001525//angiogenesis;GO:0006412//translation;GO:0044763//single-organism cellular process;GO:0048514//blood vessel morphoge…
XP_005902703	0	440.557	0.001	23.67	14.5308	5.43e-12	8.88e-10	up	PAPD5	PREDICTED: non-canonical poly(A) RNA polymerase PAPD5 isoform X2 [Bos taurus]	Genetic Information Processing	Folding, sorting and degradation	ko03018//RNA degradation	K03514	-	GO:0097159//organic cyclic compound binding;GO:1901363//heterocyclic compound binding;GO:0005488//binding;GO:0003676//nucleic acid binding;GO:0003723//RNA binding	GO:0006139//nucleobase-containing compound metabolic process;GO:0090304//nucleic acid metabolic process;GO:0009057//macromolecule catabolic process;GO:0034641//cellular nitrogen compound metabolic process;GO:0009987//cellular process;GO:0016071//mRNA metabolic process;GO:1901361//organic cyclic compound catabolic process;GO:1901360//organic cyclic compound metabolic process;GO:0046483//heterocycl…
XP_005906629	0	291.59	0.001	23.63	14.5283	6.55e-10	6.1e-08	up	ATAD1	ATPase family AAA domain-containing protein 1 [Bos taurus]	-	-	-	-	-	-	-
XM_005911158	0	322	0.001	23.5667	14.5245	9.83e-09	6.52e-07	up	LOC102270368	PREDICTED: Bos mutus probable inactive serine protease 58 (LOC102270368), mRNA	-	-	-	-	-	-	GO:0071704//organic substance metabolic process;GO:0043170//macromolecule metabolic process;GO:0044238//primary metabolic process;GO:0008152//metabolic process;GO:0019538//protein metabolic process
XP_005907750	0	312.65	0.001	23.56	14.5241	9.27e-12	1.45e-09	up	SLC25A39	PREDICTED: solute carrier family 25 member 39 isoform X1 [Bos taurus]	-	-	-	-	-	-	-
XM_005900048	0	341.667	0.001	23.4367	14.5165	2.34e-10	2.45e-08	up	LOC102264873	PREDICTED: Bos mutus heat stress transcription factor A-5-like (LOC102264873), mRNA	-	-	-	-	GO:0044424//intracellular part;GO:0043229//intracellular organelle;GO:0043227//membrane-bounded organelle;GO:0043231//intracellular membrane-bounded organelle;GO:0005622//intracellular;GO:0043226//organelle;GO:0044464//cell part;GO:0005623//cell	GO:0097159//organic cyclic compound binding;GO:0001071//nucleic acid binding transcription factor activity;GO:1901363//heterocyclic compound binding;GO:0005488//binding;GO:0003676//nucleic acid binding;GO:0003677//DNA binding	GO:0019438//aromatic compound biosynthetic process;GO:0034654//nucleobase-containing compound biosynthetic process;GO:0016070//RNA metabolic process;GO:0043170//macromolecule metabolic process;GO:0018130//heterocycle biosynthetic process;GO:1901576//organic substance biosynthetic process;GO:0034641//cellular nitrogen compound metabolic process;GO:0006807//nitrogen compound metabolic process;GO:00…
XP_005899315	0	623.697	0.001	23.4333	14.5163	3.12e-15	1.11e-12	up	TM9SF2	transmembrane 9 superfamily member 2 precursor [Bos taurus]	-	-	-	-	GO:0005623//cell;GO:0044422//organelle part;GO:1903561//extracellular vesicle;GO:0044424//intracellular part;GO:0005773//vacuole;GO:0031090//organelle membrane;GO:0043230//extracellular organelle;GO:0005576//extracellular region;GO:0043227//membrane-bounded organelle;GO:0098588//bounding membrane of organelle;GO:0044437//vacuolar part;GO:0005622//intracellular;GO:0044446//intracellular organelle …	-	-
XP_005901650	0	322.13	0.001	23.4	14.5142	2.09e-11	2.95e-09	up	SMARCB1	PREDICTED: SWI/SNF-related matrix-associated actin-dependent regulator of chromatin subfamily B member 1 isoform X2 [Bos mutus]	-	-	-	-	-	-	-
XM_014483405	0	381.07	0.001	23.3167	14.5091	3.23e-09	2.45e-07	up	LMNTD1	PREDICTED: Bos mutus lamin tail domain containing 1 (LMNTD1), partial mRNA	-	-	-	-	GO:0043232//intracellular non-membrane-bounded organelle;GO:0012505//endomembrane system;GO:0043231//intracellular membrane-bounded organelle;GO:0043227//membrane-bounded organelle;GO:0005623//cell;GO:0043228//non-membrane-bounded organelle;GO:0044424//intracellular part;GO:0005622//intracellular;GO:0045111//intermediate filament cytoskeleton;GO:0005856//cytoskeleton;GO:0043226//organelle;GO:0044…	-	GO:0044699//single-organism process
XM_005901847	0	497.057	0.001	23.27	14.5062	1.04e-12	2e-10	up	LOC102282013	PREDICTED: Bos mutus serine/threonine-protein kinase MRCK alpha (LOC102282013), mRNA	-	-	-	-	GO:0043227//membrane-bounded organelle;GO:0044421//extracellular region part;GO:0043228//non-membrane-bounded organelle;GO:0015629//actin cytoskeleton;GO:0044424//intracellular part;GO:0043226//organelle;GO:0043230//extracellular organelle;GO:1903561//extracellular vesicle;GO:0005623//cell;GO:0031982//vesicle;GO:0005576//extracellular region;GO:0043229//intracellular organelle;GO:0044464//cell pa…	GO:0016740//transferase activity;GO:0097159//organic cyclic compound binding;GO:0004672//protein kinase activity;GO:0043167//ion binding;GO:0043169//cation binding;GO:0032550//purine ribonucleoside binding;GO:0097367//carbohydrate derivative binding;GO:0003824//catalytic activity;GO:0005515//protein binding;GO:0036094//small molecule binding;GO:0016301//kinase activity;GO:0001883//purine nucleosi…	GO:0071840//cellular component organization or biogenesis;GO:0050794//regulation of cellular process;GO:0043170//macromolecule metabolic process;GO:0006928//movement of cell or subcellular component;GO:0032501//multicellular organismal process;GO:0010646//regulation of cell communication;GO:0030029//actin filament-based process;GO:1902531//regulation of intracellular signal transduction;GO:000996…
XP_005903417	0	174.96	0.001	23.11	14.4962	7.16e-08	3.67e-06	up	RNF138	E3 ubiquitin-protein ligase RNF138 [Bos taurus]	-	-	-	-	-	-	-
XM_005903542	0	679.757	0.001	23.0633	14.4933	2.03e-17	1.32e-14	up	LOC102283708	PREDICTED: Bos mutus RNA-binding protein 4 (LOC102283708), transcript variant X1, mRNA	-	-	-	-	GO:0005623//cell;GO:0043229//intracellular organelle;GO:0005622//intracellular;GO:0031981//nuclear lumen;GO:0044444//cytoplasmic part;GO:0044428//nuclear part;GO:0044424//intracellular part;GO:0043231//intracellular membrane-bounded organelle;GO:0036464//cytoplasmic ribonucleoprotein granule;GO:0005634//nucleus;GO:0070013//intracellular organelle lumen;GO:0030529//intracellular ribonucleoprotein …	GO:0003723//RNA binding;GO:0046914//transition metal ion binding;GO:0003729//mRNA binding;GO:0043167//ion binding;GO:0097159//organic cyclic compound binding;GO:0043169//cation binding;GO:0003676//nucleic acid binding;GO:0046872//metal ion binding;GO:0044822//poly(A) RNA binding;GO:0097157//pre-mRNA intronic binding;GO:0005488//binding;GO:1901363//heterocyclic compound binding;GO:0036002//pre-mRN…	GO:0009416//response to light stimulus;GO:0010558//negative regulation of macromolecule biosynthetic process;GO:0000375//RNA splicing, via transesterification reactions;GO:0009892//negative regulation of metabolic process;GO:0060255//regulation of macromolecule metabolic process;GO:0034249//negative regulation of cellular amide metabolic process;GO:0050794//regulation of cellular process;GO:00106…
XP_014332051	0	226.903	0.001	23.05	14.4925	9.06e-10	8.12e-08	up	MBD3	PREDICTED: methyl-CpG-binding domain protein 3 isoform X2 [Bison bison bison]	-	-	-	-	-	-	-
XP_005895112	0	1213.97	0.001	22.9767	14.4879	2.92e-23	1.35e-19	up	DENND5A	PREDICTED: DENN domain-containing protein 5A [Bos mutus]	-	-	-	-	-	-	-
XP_005889806	0	183.997	0.001	22.7933	14.4763	1.19e-07	5.78e-06	up	MESDC2	PREDICTED: LDLR chaperone MESD [Bos mutus]	-	-	-	-	GO:0016020//membrane	GO:0070325//lipoprotein particle receptor binding;GO:0005515//protein binding;GO:0005488//binding;GO:0005102//receptor binding	GO:0007154//cell communication;GO:0051179//localization;GO:0007166//cell surface receptor signaling pathway;GO:0007165//signal transduction;GO:0023052//signaling;GO:0065007//biological regulation;GO:0044763//single-organism cellular process;GO:0050896//response to stimulus;GO:0008104//protein localization;GO:0044700//single organism signaling;GO:0033036//macromolecule localization;GO:0009987//cel…
XP_005889350	0	421.14	0.001	22.7867	14.4759	1.94e-10	2.06e-08	up	UBE2J1	ubiquitin-conjugating enzyme E2 J1 [Bos taurus]	Genetic Information Processing	Folding, sorting and degradation	ko04141//Protein processing in endoplasmic reticulum;ko04120//Ubiquitin mediated proteolysis	K10578	-	-	-
XP_005900812	0	105.653	0.001	22.7733	14.4751	4.95e-07	2.01e-05	up	MRPL13	39S ribosomal protein L13, mitochondrial [Bos taurus]	Genetic Information Processing	Translation	ko03010//Ribosome	K02871	-	-	-
XM_005890650	0	342.617	0.001	22.7267	14.4721	5.25e-10	4.99e-08	up	LOC102273290	PREDICTED: Bos mutus heat shock transcription factor, X-linked (LOC102273290), mRNA	-	-	-	-	GO:0044464//cell part;GO:0043226//organelle;GO:0043227//membrane-bounded organelle;GO:0043229//intracellular organelle;GO:0005622//intracellular;GO:0043231//intracellular membrane-bounded organelle;GO:0044424//intracellular part;GO:0005623//cell	GO:0001071//nucleic acid binding transcription factor activity;GO:0005488//binding;GO:0097159//organic cyclic compound binding;GO:1901363//heterocyclic compound binding;GO:0003677//DNA binding;GO:0003676//nucleic acid binding	GO:0046483//heterocycle metabolic process;GO:0044260//cellular macromolecule metabolic process;GO:1901362//organic cyclic compound biosynthetic process;GO:0009987//cellular process;GO:0097659//nucleic acid-templated transcription;GO:0090304//nucleic acid metabolic process;GO:0018130//heterocycle biosynthetic process;GO:0009058//biosynthetic process;GO:0032774//RNA biosynthetic process;GO:0008152/…
XP_005910467	0	354.42	0.001	22.7167	14.4715	5.36e-11	6.61e-09	up	KIAA1715	PREDICTED: protein lunapark isoform X1 [Bos mutus]	-	-	-	-	-	-	-
XP_005901622	0	510.223	0.001	22.6533	14.4674	2.03e-08	1.21e-06	up	TOR1AIP1	PREDICTED: torsin-1A-interacting protein 1 [Bos mutus]	-	-	-	-	GO:0044464//cell part;GO:0043231//intracellular membrane-bounded organelle;GO:0043229//intracellular organelle;GO:0043227//membrane-bounded organelle;GO:0005622//intracellular;GO:0043226//organelle;GO:0005623//cell;GO:0012505//endomembrane system;GO:0044424//intracellular part	GO:0005488//binding;GO:0005515//protein binding;GO:0019899//enzyme binding	GO:0008104//protein localization;GO:0010256//endomembrane system organization;GO:0016043//cellular component organization;GO:0051336//regulation of hydrolase activity;GO:0065007//biological regulation;GO:0044699//single-organism process;GO:0065009//regulation of molecular function;GO:0051641//cellular localization;GO:0034613//cellular protein localization;GO:0061024//membrane organization;GO:0006…
XP_005910413	0	107.46	0.001	22.33	14.4467	1.65e-06	5.85e-05	up	MSRB3	PREDICTED: methionine-R-sulfoxide reductase B3 [Bos taurus]	-	-	-	-	GO:0043229//intracellular organelle;GO:0043231//intracellular membrane-bounded organelle;GO:0005622//intracellular;GO:0043227//membrane-bounded organelle;GO:0005623//cell;GO:0044464//cell part;GO:0043226//organelle;GO:0044424//intracellular part	GO:0043169//cation binding;GO:0046872//metal ion binding;GO:0003824//catalytic activity;GO:0016667//oxidoreductase activity, acting on a sulfur group of donors;GO:0005488//binding;GO:0043167//ion binding;GO:0046914//transition metal ion binding;GO:0016671//oxidoreductase activity, acting on a sulfur group of donors, disulfide as acceptor;GO:0016491//oxidoreductase activity	GO:0044260//cellular macromolecule metabolic process;GO:0050896//response to stimulus;GO:0019538//protein metabolic process;GO:0006950//response to stress;GO:0009987//cellular process;GO:0044267//cellular protein metabolic process;GO:0071704//organic substance metabolic process;GO:0044699//single-organism process;GO:0008152//metabolic process;GO:0044237//cellular metabolic process;GO:0044238//pri…
XP_005910414	0	107.46	0.001	22.33	14.4467	1.65e-06	5.85e-05	up	MSRB3	PREDICTED: methionine-R-sulfoxide reductase B3 [Bos taurus]	-	-	-	-	GO:0044424//intracellular part;GO:0043227//membrane-bounded organelle;GO:0043231//intracellular membrane-bounded organelle;GO:0043229//intracellular organelle;GO:0005622//intracellular;GO:0044464//cell part;GO:0043226//organelle;GO:0005623//cell	GO:0003824//catalytic activity;GO:0043169//cation binding;GO:0046872//metal ion binding;GO:0043167//ion binding;GO:0016667//oxidoreductase activity, acting on a sulfur group of donors;GO:0016671//oxidoreductase activity, acting on a sulfur group of donors, disulfide as acceptor;GO:0005488//binding;GO:0046914//transition metal ion binding;GO:0016491//oxidoreductase activity	GO:0050896//response to stimulus;GO:0044710//single-organism metabolic process;GO:0008152//metabolic process;GO:0044699//single-organism process;GO:0009987//cellular process;GO:0044237//cellular metabolic process;GO:0043170//macromolecule metabolic process;GO:0044267//cellular protein metabolic process;GO:0044260//cellular macromolecule metabolic process;GO:0044238//primary metabolic process;GO:0…
XP_005894245	0	648.4	0.001	22.31	14.4454	3.73e-12	6.35e-10	up	KIF2C	PREDICTED: kinesin-like protein KIF2C [Bos mutus]	-	-	-	-	-	-	-
XM_005895703	0	157.68	0.001	22.2967	14.4445	4.92e-07	2e-05	up	LOC102265043	PREDICTED: Bos mutus chromosome unknown open reading frame, human C2orf70 (LOC102265043), mRNA	-	-	-	-	-	-	-
XP_005894229	0	563.07	0.001	22.25	14.4415	7.98e-13	1.6e-10	up	STT3B	PREDICTED: dolichyl-diphosphooligosaccharide--protein glycosyltransferase subunit STT3B [Bos mutus]	Metabolism;Genetic Information Processing	Glycan biosynthesis and metabolism;Folding, sorting and degradation	ko04141//Protein processing in endoplasmic reticulum;ko00510//N-Glycan biosynthesis	K07151	-	-	-
XP_014336794	0	538.68	0.001	22.2033	14.4385	5.61e-16	2.36e-13	up	GGA2	ADP-ribosylation factor-binding protein GGA2, partial [Bos mutus]	Cellular Processes	Transport and catabolism	ko04142//Lysosome	K12404	GO:0044424//intracellular part;GO:0048475//coated membrane;GO:0098796//membrane protein complex;GO:0030119//AP-type membrane coat adaptor complex;GO:0005622//intracellular;GO:0016020//membrane;GO:0031988//membrane-bounded vesicle;GO:0044464//cell part;GO:0031410//cytoplasmic vesicle;GO:0016023//cytoplasmic, membrane-bounded vesicle;GO:0043231//intracellular membrane-bounded organelle;GO:0005623//…	GO:0005488//binding;GO:0031267//small GTPase binding;GO:0005515//protein binding;GO:0019899//enzyme binding;GO:0051020//GTPase binding	GO:0045184//establishment of protein localization;GO:0006810//transport;GO:0051234//establishment of localization;GO:0071702//organic substance transport;GO:0008104//protein localization;GO:0051179//localization;GO:0015031//protein transport;GO:0033036//macromolecule localization
XP_005898160	0	683.833	0.001	22.1733	14.4365	5.14e-18	3.96e-15	up	BAP1	PREDICTED: ubiquitin carboxyl-terminal hydrolase BAP1 isoform X1 [Bos mutus]	-	-	-	-	GO:0070013//intracellular organelle lumen;GO:0043229//intracellular organelle;GO:0044422//organelle part;GO:0043226//organelle;GO:0005634//nucleus;GO:0043233//organelle lumen;GO:0032991//macromolecular complex;GO:0044424//intracellular part;GO:0044446//intracellular organelle part;GO:0005622//intracellular;GO:0005623//cell;GO:0044428//nuclear part;GO:0031519//PcG protein complex;GO:0043234//prote…	GO:0044877//macromolecular complex binding;GO:0008234//cysteine-type peptidase activity;GO:0070011//peptidase activity, acting on L-amino acid peptides;GO:0016787//hydrolase activity;GO:0003824//catalytic activity;GO:0008233//peptidase activity;GO:0005488//binding;GO:0019783//ubiquitin-like protein-specific protease activity;GO:0101005//ubiquitinyl hydrolase activity;GO:0036459//thiol-dependent u…	GO:0044763//single-organism cellular process;GO:0044260//cellular macromolecule metabolic process;GO:0006605//protein targeting;GO:0006626//protein targeting to mitochondrion;GO:0044265//cellular macromolecule catabolic process;GO:0046907//intracellular transport;GO:0051603//proteolysis involved in cellular protein catabolic process;GO:0043170//macromolecule metabolic process;GO:0008152//metaboli…
XP_005897868	0	289.56	0.001	22.1133	14.4326	2.32e-10	2.43e-08	up	PCYT1A	PREDICTED: choline-phosphate cytidylyltransferase A isoform X1 [Bos taurus]	Metabolism	Lipid metabolism	ko00564//Glycerophospholipid metabolism	K00968	GO:0005737//cytoplasm;GO:0044444//cytoplasmic part;GO:0012505//endomembrane system;GO:0016020//membrane;GO:0044424//intracellular part;GO:0005623//cell;GO:0044464//cell part;GO:0005622//intracellular;GO:0042175//nuclear outer membrane-endoplasmic reticulum membrane network	-	GO:1901617//organic hydroxy compound biosynthetic process;GO:0044281//small molecule metabolic process;GO:1901615//organic hydroxy compound metabolic process;GO:1901576//organic substance biosynthetic process;GO:0071704//organic substance metabolic process;GO:0009058//biosynthetic process;GO:0044710//single-organism metabolic process;GO:0008152//metabolic process;GO:0044711//single-organism biosy…
XP_005910011	0	252.943	0.001	22.0767	14.4302	1.55e-09	1.29e-07	up	RYBP	PREDICTED: RING1 and YY1-binding protein [Bos mutus]	-	-	-	-	GO:0043234//protein complex;GO:0044464//cell part;GO:0070013//intracellular organelle lumen;GO:0043227//membrane-bounded organelle;GO:0044428//nuclear part;GO:0005634//nucleus;GO:0043229//intracellular organelle;GO:0031974//membrane-enclosed lumen;GO:0043231//intracellular membrane-bounded organelle;GO:0032991//macromolecular complex;GO:0043233//organelle lumen;GO:0031981//nuclear lumen;GO:004322…	GO:0046914//transition metal ion binding;GO:0097159//organic cyclic compound binding;GO:0003712//transcription cofactor activity;GO:0000988//transcription factor activity, protein binding;GO:0005488//binding;GO:0046872//metal ion binding;GO:0000989//transcription factor activity, transcription factor binding;GO:0043169//cation binding;GO:1901363//heterocyclic compound binding;GO:0003676//nucleic …	GO:0046483//heterocycle metabolic process;GO:0012501//programmed cell death;GO:0006351//transcription, DNA-templated;GO:0044763//single-organism cellular process;GO:0019438//aromatic compound biosynthetic process;GO:1901362//organic cyclic compound biosynthetic process;GO:0032774//RNA biosynthetic process;GO:0010390//histone monoubiquitination;GO:0044271//cellular nitrogen compound biosynthetic p…
XM_005910182	0	334.147	0.001	22.0733	14.43	7.04e-09	4.92e-07	up	CCDC54	PREDICTED: Bos mutus coiled-coil domain containing 54 (CCDC54), transcript variant X1, mRNA	-	-	-	-	-	-	-
XP_005909014	0	142.36	0.001	21.7733	14.4103	1.39e-06	5.01e-05	up	CCDC70	PREDICTED: coiled-coil domain-containing protein 70 [Bos mutus]	-	-	-	-	GO:0016020//membrane	-	-
XP_005911094	0	274.177	0.001	21.7733	14.4103	4.39e-10	4.25e-08	up	LOC102272442	PREDICTED: LOW QUALITY PROTEIN: chromosome 21 open reading frame, human C14orf79, partial [Capra hircus]	-	-	-	-	-	-	-
XP_005898250	0	80.8567	0.001	21.7167	14.4065	5.7e-06	0.000171514	up	SNX3	sorting nexin-3 isoform a [Homo sapiens]	Cellular Processes	Transport and catabolism	ko04144//Endocytosis	K17918	-	-	-
XP_005906256	0	470.033	0.001	21.69	14.4047	2.77e-14	7.81e-12	up	KPNA6	PREDICTED: importin subunit alpha-7 isoform X1 [Bos mutus]	-	-	-	-	-	-	-
Unigene005376	0	5	0.001	21.6667	14.4032	0.0318251	0.173718	no	-	-	-	-	-	-	-	-	-
XP_005894916	0	223.713	0.001	21.65	14.4021	6.3e-09	4.45e-07	up	QKI	PREDICTED: protein quaking, partial [Heterocephalus glaber]	-	-	-	-	GO:0043226//organelle;GO:0044464//cell part;GO:0044424//intracellular part;GO:0043231//intracellular membrane-bounded organelle;GO:0043227//membrane-bounded organelle;GO:0005622//intracellular;GO:0005623//cell;GO:0043229//intracellular organelle	GO:0044822//poly(A) RNA binding;GO:0003676//nucleic acid binding;GO:0097159//organic cyclic compound binding;GO:0019904//protein domain specific binding;GO:0005515//protein binding;GO:1901363//heterocyclic compound binding;GO:0003723//RNA binding;GO:0005488//binding	GO:0006725//cellular aromatic compound metabolic process;GO:0034249//negative regulation of cellular amide metabolic process;GO:0050779//RNA destabilization;GO:0043488//regulation of mRNA stability;GO:0043170//macromolecule metabolic process;GO:0032269//negative regulation of cellular protein metabolic process;GO:0050658//RNA transport;GO:0043487//regulation of RNA stability;GO:0006807//nitrogen …
XP_005896232	0	107.367	0.001	21.54	14.3947	5.43e-07	2.2e-05	up	ARL8B	ADP-ribosylation factor-like protein 8B [Homo sapiens]	-	-	-	-	GO:0005773//vacuole;GO:0044464//cell part;GO:0005623//cell;GO:0044446//intracellular organelle part;GO:0005819//spindle;GO:0044444//cytoplasmic part;GO:0005576//extracellular region;GO:1903561//extracellular vesicle;GO:0012505//endomembrane system;GO:0005770//late endosome;GO:0043229//intracellular organelle;GO:0043230//extracellular organelle;GO:0005737//cytoplasm;GO:0005856//cytoskeleton;GO:004…	GO:0032550//purine ribonucleoside binding;GO:0032549//ribonucleoside binding;GO:0005515//protein binding;GO:0036094//small molecule binding;GO:0008092//cytoskeletal protein binding;GO:0015631//tubulin binding;GO:1901363//heterocyclic compound binding;GO:0097159//organic cyclic compound binding;GO:0097367//carbohydrate derivative binding;GO:0001882//nucleoside binding;GO:0005488//binding;GO:000188…	GO:0065007//biological regulation;GO:0007154//cell communication;GO:0000278//mitotic cell cycle;GO:0007049//cell cycle;GO:0044763//single-organism cellular process;GO:0044699//single-organism process;GO:0023052//signaling;GO:0035556//intracellular signal transduction;GO:0007165//signal transduction;GO:0051716//cellular response to stimulus;GO:0050789//regulation of biological process;GO:0009987//…
XM_005898120	0	108	0.001	21.34	14.3813	4.77e-06	0.000146877	up	IQCF2	PREDICTED: Bos mutus IQ motif containing F2 (IQCF2), mRNA	-	-	-	-	-	-	-
XM_005901538	0	555.883	0.001	21.3267	14.3804	3.71e-12	6.33e-10	up	PPP2R1B	PREDICTED: Bos mutus protein phosphatase 2, regulatory subunit A, beta (PPP2R1B), transcript variant X2, mRNA	Environmental Information Processing;Genetic Information Processing;Organismal Systems;Cellular Processes	Circulatory system;Signal transduction;Nervous system;Cellular commiunity;Translation;Cell growth and death	ko04151//PI3K-Akt signaling pathway;ko04261//Adrenergic signaling in cardiomyocytes;ko04390//Hippo signaling pathway;ko04728//Dopaminergic synapse;ko04530//Tight junction;ko04152//AMPK signaling pathway;ko04114//Oocyte meiosis;ko04071//Sphingolipid signaling pathway;ko03015//mRNA surveillance pathway;ko04350//TGF-beta signaling pathway;ko04730//Long-term depression	K03456	GO:1903561//extracellular vesicle;GO:0044421//extracellular region part;GO:0098857//membrane microdomain;GO:0005576//extracellular region;GO:0043230//extracellular organelle;GO:0016020//membrane;GO:0031982//vesicle;GO:0098805//whole membrane;GO:0044425//membrane part;GO:0043227//membrane-bounded organelle;GO:0043226//organelle;GO:0098589//membrane region	GO:0098772//molecular function regulator;GO:0030234//enzyme regulator activity;GO:0019888//protein phosphatase regulator activity;GO:0019208//phosphatase regulator activity	GO:0007154//cell communication;GO:0071840//cellular component organization or biogenesis;GO:0044699//single-organism process;GO:0019222//regulation of metabolic process;GO:0023052//signaling;GO:0097192//extrinsic apoptotic signaling pathway in absence of ligand;GO:0009653//anatomical structure morphogenesis;GO:0006915//apoptotic process;GO:0065003//macromolecular complex assembly;GO:0009987//cell…
XP_005903223	0	427.827	0.001	21.2367	14.3743	3.76e-14	1.03e-11	up	CDKN2AIP	PREDICTED: CDKN2A-interacting protein [Bos mutus]	-	-	-	-	GO:0044422//organelle part;GO:0043233//organelle lumen;GO:0044424//intracellular part;GO:0031974//membrane-enclosed lumen;GO:0005623//cell;GO:0044428//nuclear part;GO:0070013//intracellular organelle lumen;GO:0005634//nucleus;GO:0031981//nuclear lumen;GO:0005622//intracellular;GO:0043226//organelle;GO:0044446//intracellular organelle part;GO:0043229//intracellular organelle;GO:0043227//membrane-b…	GO:0005488//binding;GO:0005515//protein binding	GO:0044700//single organism signaling;GO:0044763//single-organism cellular process;GO:0006950//response to stress;GO:0040007//growth;GO:0065008//regulation of biological quality;GO:0050794//regulation of cellular process;GO:0007165//signal transduction;GO:0033554//cellular response to stress;GO:0044699//single-organism process;GO:0051716//cellular response to stimulus;GO:0009987//cellular process…
XP_005900709	0	275.99	0.001	21.2267	14.3736	1e-10	1.13e-08	up	HSF5	PREDICTED: heat shock factor protein 5 [Bos mutus]	-	-	-	-	GO:0043231//intracellular membrane-bounded organelle;GO:0043227//membrane-bounded organelle;GO:0005623//cell;GO:0043226//organelle;GO:0005622//intracellular;GO:0044424//intracellular part;GO:0044464//cell part;GO:0043229//intracellular organelle	GO:0097159//organic cyclic compound binding;GO:0003676//nucleic acid binding;GO:1901363//heterocyclic compound binding;GO:0001071//nucleic acid binding transcription factor activity;GO:0003677//DNA binding;GO:0005488//binding	GO:0034645//cellular macromolecule biosynthetic process;GO:0044237//cellular metabolic process;GO:0044249//cellular biosynthetic process;GO:0008152//metabolic process;GO:1901576//organic substance biosynthetic process;GO:0046483//heterocycle metabolic process;GO:0071704//organic substance metabolic process;GO:1901362//organic cyclic compound biosynthetic process;GO:0097659//nucleic acid-templated…
XM_014480740	0	151.11	0.001	21.1233	14.3665	1.92e-06	6.67e-05	up	RBM4B	PREDICTED: Bos mutus RNA binding motif protein 4B (RBM4B), transcript variant X4, mRNA	-	-	-	-	GO:0005634//nucleus;GO:0031981//nuclear lumen;GO:0043226//organelle;GO:0044424//intracellular part;GO:0070013//intracellular organelle lumen;GO:0005623//cell;GO:0005622//intracellular;GO:0044428//nuclear part;GO:0044446//intracellular organelle part;GO:0044422//organelle part;GO:0043229//intracellular organelle;GO:0043231//intracellular membrane-bounded organelle;GO:0043227//membrane-bounded orga…	GO:0043169//cation binding;GO:0097159//organic cyclic compound binding;GO:0046914//transition metal ion binding;GO:0043167//ion binding;GO:0046872//metal ion binding;GO:0003723//RNA binding;GO:1901363//heterocyclic compound binding;GO:0003676//nucleic acid binding;GO:0005488//binding	GO:1901576//organic substance biosynthetic process;GO:0009059//macromolecule biosynthetic process;GO:0044267//cellular protein metabolic process;GO:0009628//response to abiotic stimulus;GO:0009314//response to radiation;GO:0044249//cellular biosynthetic process;GO:0019538//protein metabolic process;GO:0090304//nucleic acid metabolic process;GO:0050896//response to stimulus;GO:0048511//rhythmic pr…
XP_005899928	0	151.54	0.001	21.1167	14.3661	2.78e-08	1.59e-06	up	NUDT21	cleavage and polyadenylation specificity factor subunit 5 [Homo sapiens]	Genetic Information Processing	Translation	ko03015//mRNA surveillance pathway	K14397	GO:0031981//nuclear lumen;GO:0044464//cell part;GO:0043232//intracellular non-membrane-bounded organelle;GO:0005623//cell;GO:0043231//intracellular membrane-bounded organelle;GO:0005856//cytoskeleton;GO:0043233//organelle lumen;GO:0044428//nuclear part;GO:0044446//intracellular organelle part;GO:0032991//macromolecular complex;GO:0043227//membrane-bounded organelle;GO:0043229//intracellular organ…	GO:0044822//poly(A) RNA binding;GO:0003824//catalytic activity;GO:0046983//protein dimerization activity;GO:0005515//protein binding;GO:0019899//enzyme binding;GO:1901363//heterocyclic compound binding;GO:0097159//organic cyclic compound binding;GO:0003723//RNA binding;GO:0005488//binding;GO:0003676//nucleic acid binding	GO:0022607//cellular component assembly;GO:0051259//protein oligomerization;GO:0000375//RNA splicing, via transesterification reactions;GO:0097659//nucleic acid-templated transcription;GO:0031124//mRNA 3'-end processing;GO:0090304//nucleic acid metabolic process;GO:0010467//gene expression;GO:0044271//cellular nitrogen compound biosynthetic process;GO:0043170//macromolecule metabolic process;GO:0…
XP_005906290	0	151.15	0.001	21.1067	14.3654	3.21e-08	1.8e-06	up	AK2	adenylate kinase 2, mitochondrial [Bos taurus]	Metabolism	Nucleotide metabolism	ko00230//Purine metabolism	K00939	GO:0031090//organelle membrane;GO:0031514//motile cilium;GO:0031967//organelle envelope;GO:0005737//cytoplasm;GO:0044444//cytoplasmic part;GO:0005929//cilium;GO:0043227//membrane-bounded organelle;GO:0005623//cell;GO:0043231//intracellular membrane-bounded organelle;GO:0097223//sperm part;GO:0036126//sperm flagellum;GO:0044429//mitochondrial part;GO:0044421//extracellular region part;GO:0044422//…	GO:0032550//purine ribonucleoside binding;GO:0001883//purine nucleoside binding;GO:0016740//transferase activity;GO:0032549//ribonucleoside binding;GO:0016301//kinase activity;GO:0005488//binding;GO:0016772//transferase activity, transferring phosphorus-containing groups;GO:0036094//small molecule binding;GO:1901363//heterocyclic compound binding;GO:0003824//catalytic activity;GO:0016776//phospho…	GO:0009058//biosynthetic process;GO:0034654//nucleobase-containing compound biosynthetic process;GO:0009165//nucleotide biosynthetic process;GO:0046390//ribose phosphate biosynthetic process;GO:0046483//heterocycle metabolic process;GO:0009150//purine ribonucleotide metabolic process;GO:1901362//organic cyclic compound biosynthetic process;GO:0018130//heterocycle biosynthetic process;GO:0009117//…
XP_005906488	0	681.723	0.001	21.0933	14.3645	7.38e-18	5.34e-15	up	PATL1	protein PAT1 homolog 1 [Bos taurus]	Genetic Information Processing	Folding, sorting and degradation	ko03018//RNA degradation	K12617	-	-	-
XP_005909988	0	1153.43	0.001	21.0467	14.3613	1.93e-22	5.53e-19	up	TPP2	PREDICTED: tripeptidyl-peptidase 2 [Bos mutus]	-	-	-	-	-	-	-
XP_005888625	0	335.017	0.001	20.9833	14.357	6.66e-06	0.000195585	up	NEK2	PREDICTED: serine/threonine-protein kinase Nek2 isoform X1 [Bos taurus]	-	-	-	-	-	-	-
XM_005891239	0	342.667	0.001	20.8967	14.351	2.08e-09	1.68e-07	up	LOC102265680	PREDICTED: Bos mutus chromosome unknown open reading frame, human C3orf30 (LOC102265680), mRNA	-	-	-	-	-	-	-
XP_014332911	0	298.67	0.001	20.8133	14.3452	3.63e-10	3.61e-08	up	OSCP1	PREDICTED: protein OSCP1 [Bos mutus]	-	-	-	-	GO:0016323//basolateral plasma membrane;GO:0016020//membrane;GO:0044425//membrane part;GO:0005623//cell;GO:0044459//plasma membrane part;GO:0071944//cell periphery;GO:0098590//plasma membrane region;GO:0044464//cell part;GO:0005886//plasma membrane	-	GO:0070727//cellular macromolecule localization;GO:0051234//establishment of localization;GO:0009987//cellular process;GO:0006839//mitochondrial transport;GO:0015031//protein transport;GO:0072655//establishment of protein localization to mitochondrion;GO:0006626//protein targeting to mitochondrion;GO:0072594//establishment of protein localization to organelle;GO:0007005//mitochondrion organizatio…
XP_005910603	0	148.75	0.001	20.7667	14.342	7.72e-08	3.94e-06	up	EAF1	ELL-associated factor 1, partial [Bos mutus]	-	-	-	-	GO:0005634//nucleus;GO:0044451//nucleoplasm part;GO:0031974//membrane-enclosed lumen;GO:0032991//macromolecular complex;GO:0044424//intracellular part;GO:0043231//intracellular membrane-bounded organelle;GO:0043233//organelle lumen;GO:0008023//transcription elongation factor complex;GO:0044446//intracellular organelle part;GO:0005623//cell;GO:0043229//intracellular organelle;GO:0005576//extracell…	GO:0005515//protein binding;GO:0005488//binding	GO:0018130//heterocycle biosynthetic process;GO:0034654//nucleobase-containing compound biosynthetic process;GO:0006807//nitrogen compound metabolic process;GO:0016070//RNA metabolic process;GO:0044238//primary metabolic process;GO:0044249//cellular biosynthetic process;GO:1901362//organic cyclic compound biosynthetic process;GO:0071704//organic substance metabolic process;GO:0032774//RNA biosynt…
XP_014332470	0	437.227	0.001	20.7467	14.3406	5.91e-13	1.23e-10	up	ST7L	PREDICTED: suppressor of tumorigenicity 7 protein-like isoform X1 [Bos mutus]	-	-	-	-	GO:0016020//membrane;GO:0044425//membrane part;GO:0031224//intrinsic component of membrane	-	GO:0040007//growth;GO:0016049//cell growth;GO:0044763//single-organism cellular process;GO:0044699//single-organism process;GO:0009987//cellular process
XM_005889827	0	307.587	0.001	20.7	14.3373	3.25e-09	2.47e-07	up	TBATA	PREDICTED: Bos mutus thymus, brain and testes associated (TBATA), mRNA	-	-	-	-	GO:0044464//cell part;GO:0005623//cell;GO:0005622//intracellular;GO:0044424//intracellular part;GO:0005737//cytoplasm;GO:0044444//cytoplasmic part	-	GO:0007276//gamete generation;GO:0048232//male gamete generation;GO:0032502//developmental process;GO:0000003//reproduction;GO:0044763//single-organism cellular process;GO:0032501//multicellular organismal process;GO:0044767//single-organism developmental process;GO:0044703//multi-organism reproductive process;GO:0044707//single-multicellular organism process;GO:0044702//single organism reproduct…
XM_005911211	0	530.24	0.001	20.65	14.3339	1.42e-10	1.56e-08	up	FAM71B	PREDICTED: Bos mutus family with sequence similarity 71, member B (FAM71B), mRNA	-	-	-	-	GO:0043227//membrane-bounded organelle;GO:0044464//cell part;GO:0043231//intracellular membrane-bounded organelle;GO:0005622//intracellular;GO:0043226//organelle;GO:0043229//intracellular organelle;GO:0005623//cell;GO:0044424//intracellular part	-	-
XM_005902464	0	252.333	0.001	20.5533	14.3271	2.32e-09	1.83e-07	up	SMCO2	PREDICTED: Bos mutus single-pass membrane protein with coiled-coil domains 2 (SMCO2), mRNA	-	-	-	-	GO:0031224//intrinsic component of membrane;GO:0016020//membrane;GO:0044425//membrane part	-	-
XP_005902526	0	252.333	0.001	20.5533	14.3271	2.3e-09	1.82e-07	up	SMCO2	PREDICTED: single-pass membrane and coiled-coil domain-containing protein 2 [Bos mutus]	-	-	-	-	GO:0044425//membrane part;GO:0031224//intrinsic component of membrane;GO:0016020//membrane	-	-
XM_005895333	0	418.667	0.001	20.5067	14.3238	3.21e-11	4.27e-09	up	LOC102267588	PREDICTED: Bos mutus hyaluronidase-4 (LOC102267588), mRNA	Metabolism	Glycan biosynthesis and metabolism	ko00531//Glycosaminoglycan degradation	K01197	GO:0044425//membrane part;GO:0031224//intrinsic component of membrane;GO:0016020//membrane	GO:0016787//hydrolase activity;GO:0015929//hexosaminidase activity;GO:0004553//hydrolase activity, hydrolyzing O-glycosyl compounds;GO:0003824//catalytic activity;GO:0016798//hydrolase activity, acting on glycosyl bonds	GO:0044238//primary metabolic process;GO:0008152//metabolic process
XP_005896004	0	210.233	0.001	20.4567	14.3203	2.13e-08	1.26e-06	up	FAM76A	PREDICTED: protein FAM76A [Bos mutus]	-	-	-	-	-	-	-
XP_014334728	0	315.95	0.001	20.2567	14.3061	1.39e-11	2.08e-09	up	SEC61A2	Protein transport protein Sec61 subunit alpha isoform 2, partial [Bos mutus]	Genetic Information Processing;Cellular Processes	Folding, sorting and degradation;Transport and catabolism	ko04141//Protein processing in endoplasmic reticulum;ko04145//Phagosome;ko03060//Protein export	K10956	GO:0005623//cell;GO:0005737//cytoplasm;GO:0043227//membrane-bounded organelle;GO:0044444//cytoplasmic part;GO:0043226//organelle;GO:0044424//intracellular part;GO:0042175//nuclear outer membrane-endoplasmic reticulum membrane network;GO:0005622//intracellular;GO:0043231//intracellular membrane-bounded organelle;GO:0044464//cell part;GO:0043229//intracellular organelle;GO:0044425//membrane part;GO…	GO:0005488//binding;GO:0044877//macromolecular complex binding;GO:0043021//ribonucleoprotein complex binding	GO:0006986//response to unfolded protein;GO:0034620//cellular response to unfolded protein;GO:0007154//cell communication;GO:0051179//localization;GO:0033036//macromolecule localization;GO:0051234//establishment of localization;GO:0044700//single organism signaling;GO:0008104//protein localization;GO:0044699//single-organism process;GO:0065007//biological regulation;GO:0035967//cellular response …
XP_014334783	0	965.113	0.001	20.2267	14.304	1.22e-18	1.19e-15	up	ZFR	PREDICTED: zinc finger RNA-binding protein [Bos mutus]	-	-	-	-	GO:0005623//cell;GO:0031974//membrane-enclosed lumen;GO:0005634//nucleus;GO:0044424//intracellular part;GO:0044446//intracellular organelle part;GO:0043227//membrane-bounded organelle;GO:0070013//intracellular organelle lumen;GO:0044422//organelle part;GO:0044464//cell part;GO:0044428//nuclear part;GO:0043226//organelle;GO:0005622//intracellular;GO:0043233//organelle lumen;GO:0043231//intracellul…	GO:0005488//binding;GO:0046872//metal ion binding;GO:0003676//nucleic acid binding;GO:0043167//ion binding;GO:0043169//cation binding;GO:0003723//RNA binding;GO:0046914//transition metal ion binding;GO:0097159//organic cyclic compound binding;GO:1901363//heterocyclic compound binding	-
XM_014480166	0	248.75	0.001	20.22	14.3035	2.35e-08	1.37e-06	up	RNASE6	PREDICTED: Bos mutus ribonuclease, RNase A family, k6 (RNASE6), transcript variant X2, mRNA	-	-	-	-	-	-	-
XM_014482154	0	531.333	0.001	20.0367	14.2904	1.36e-13	3.25e-11	up	MBD1	PREDICTED: Bos mutus methyl-CpG binding domain protein 1 (MBD1), transcript variant X2, mRNA	-	-	-	-	-	-	-
XP_005890478	0	207.637	0.001	20.0167	14.2889	9.25e-09	6.22e-07	up	VDAC1	voltage-dependent anion-selective channel protein 1 [Oryctolagus cuniculus]	Environmental Information Processing	Signal transduction	ko04020//Calcium signaling pathway;ko04022//cGMP - PKG signaling pathway	K05862	GO:0045202//synapse;GO:0043230//extracellular organelle;GO:0043229//intracellular organelle;GO:0043226//organelle;GO:0044422//organelle part;GO:0005576//extracellular region;GO:0005737//cytoplasm;GO:0032991//macromolecular complex;GO:0031967//organelle envelope;GO:0044425//membrane part;GO:0044444//cytoplasmic part;GO:0044464//cell part;GO:0005623//cell;GO:0005622//intracellular;GO:1903561//extra…	GO:0019899//enzyme binding;GO:0022829//wide pore channel activity;GO:0022857//transmembrane transporter activity;GO:0022832//voltage-gated channel activity;GO:0022892//substrate-specific transporter activity;GO:0019900//kinase binding;GO:0022838//substrate-specific channel activity;GO:0015267//channel activity;GO:0005244//voltage-gated ion channel activity;GO:0022836//gated channel activity;GO:00…	GO:1902589//single-organism organelle organization;GO:0044419//interspecies interaction between organisms;GO:0050890//cognition;GO:0003008//system process;GO:0030001//metal ion transport;GO:0032502//developmental process;GO:0044708//single-organism behavior;GO:0032879//regulation of localization;GO:0034762//regulation of transmembrane transport;GO:0006816//calcium ion transport;GO:0099536//synapt…
XP_014332046	0	207.637	0.001	20.0167	14.2889	9.24e-09	6.22e-07	up	VDAC1	voltage-dependent anion-selective channel protein 1 [Oryctolagus cuniculus]	Environmental Information Processing	Signal transduction	ko04020//Calcium signaling pathway;ko04022//cGMP - PKG signaling pathway	K05862	GO:0031966//mitochondrial membrane;GO:0019866//organelle inner membrane;GO:0031975//envelope;GO:0005622//intracellular;GO:0043230//extracellular organelle;GO:0043229//intracellular organelle;GO:0044421//extracellular region part;GO:1903561//extracellular vesicle;GO:0031224//intrinsic component of membrane;GO:0044444//cytoplasmic part;GO:0098589//membrane region;GO:0005739//mitochondrion;GO:009885…	GO:0022838//substrate-specific channel activity;GO:0022891//substrate-specific transmembrane transporter activity;GO:0005515//protein binding;GO:0005488//binding;GO:0015267//channel activity;GO:0022836//gated channel activity;GO:0019900//kinase binding;GO:0022832//voltage-gated channel activity;GO:0019899//enzyme binding;GO:0005216//ion channel activity;GO:0005215//transporter activity;GO:0022829…	GO:0030154//cell differentiation;GO:0098916//anterograde trans-synaptic signaling;GO:0006810//transport;GO:0009987//cellular process;GO:0000422//mitophagy;GO:0006816//calcium ion transport;GO:0044763//single-organism cellular process;GO:0006952//defense response;GO:0044237//cellular metabolic process;GO:0050789//regulation of biological process;GO:1902589//single-organism organelle organization;G…
XP_005903679	0	518.09	0.001	20	14.2877	6.47e-15	2.15e-12	up	WBP11	PREDICTED: WW domain-binding protein 11 isoform X1 [Bos mutus]	Genetic Information Processing	Transcription	ko03040//Spliceosome	K12866	-	-	-
XP_005903680	0	518.09	0.001	20	14.2877	6.46e-15	2.15e-12	up	WBP11	PREDICTED: WW domain-binding protein 11 isoform X1 [Bos mutus]	Genetic Information Processing	Transcription	ko03040//Spliceosome	K12866	-	-	-
XP_014336254	0	518.09	0.001	20	14.2877	6.46e-15	2.15e-12	up	WBP11	PREDICTED: WW domain-binding protein 11 isoform X1 [Bos mutus]	Genetic Information Processing	Transcription	ko03040//Spliceosome	K12866	-	-	-
XP_005886855	0	2753.96	0.001	19.96	14.2848	9.02e-25	6.25e-21	up	SRRM2	PREDICTED: LOW QUALITY PROTEIN: serine/arginine repetitive matrix protein 2-like [Bos mutus]	-	-	-	-	GO:0005634//nucleus;GO:0043227//membrane-bounded organelle;GO:0030529//intracellular ribonucleoprotein complex;GO:0044428//nuclear part;GO:0032991//macromolecular complex;GO:0016604//nuclear body;GO:0043231//intracellular membrane-bounded organelle;GO:0044446//intracellular organelle part;GO:0043226//organelle;GO:0044464//cell part;GO:0044422//organelle part;GO:0044451//nucleoplasm part;GO:000562…	GO:0003676//nucleic acid binding;GO:0005515//protein binding;GO:1901363//heterocyclic compound binding;GO:0097159//organic cyclic compound binding;GO:0005488//binding;GO:0003723//RNA binding;GO:0019904//protein domain specific binding	-
XP_005894168	0	230.633	0.001	19.96	14.2848	1.57e-08	9.69e-07	up	ZNHIT2	PREDICTED: zinc finger HIT domain-containing protein 2 [Bos mutus]	-	-	-	-	-	-	-
XP_014337002	0	313.1	0.001	19.94	14.2834	3.52e-07	1.48e-05	up	HEMGN	Hemogen [Bos mutus]	-	-	-	-	GO:0043229//intracellular organelle;GO:0005623//cell;GO:0005622//intracellular;GO:0043226//organelle;GO:0044464//cell part;GO:0044424//intracellular part;GO:0043231//intracellular membrane-bounded organelle;GO:0043227//membrane-bounded organelle	-	GO:0009987//cellular process;GO:0044707//single-multicellular organism process;GO:0032501//multicellular organismal process;GO:0048869//cellular developmental process;GO:0044767//single-organism developmental process;GO:0032502//developmental process;GO:0044763//single-organism cellular process;GO:0044699//single-organism process
XP_014332177	0	846.66	0.001	19.9267	14.2824	8.79e-19	8.71e-16	up	DNM2	PREDICTED: dynamin-2 [Capra hircus]	Organismal Systems;Cellular Processes	Excretory system;Nervous system;Transport and catabolism	ko04144//Endocytosis;ko04721//Synaptic vesicle cycle;ko04961//Endocrine and other factor-regulated calcium reabsorption	K01528	GO:0031982//vesicle;GO:0044425//membrane part;GO:0043227//membrane-bounded organelle;GO:1903561//extracellular vesicle;GO:0043226//organelle;GO:0071944//cell periphery;GO:0043231//intracellular membrane-bounded organelle;GO:0005576//extracellular region;GO:0043228//non-membrane-bounded organelle;GO:0005856//cytoskeleton;GO:0005924//cell-substrate adherens junction;GO:0043229//intracellular organe…	GO:0019904//protein domain specific binding;GO:0005515//protein binding;GO:0001882//nucleoside binding;GO:0016462//pyrophosphatase activity;GO:1901363//heterocyclic compound binding;GO:0016818//hydrolase activity, acting on acid anhydrides, in phosphorus-containing anhydrides;GO:0001883//purine nucleoside binding;GO:0005488//binding;GO:0097159//organic cyclic compound binding;GO:0032550//purine r…	GO:0003231//cardiac ventricle development;GO:0051128//regulation of cellular component organization;GO:0045184//establishment of protein localization;GO:0044767//single-organism developmental process;GO:0006898//receptor-mediated endocytosis;GO:0007275//multicellular organism development;GO:0003205//cardiac chamber development;GO:0072358//cardiovascular system development;GO:0015031//protein tran…
XM_014481683	0	129.317	0.001	19.8133	14.2742	1.61e-06	5.72e-05	up	MS4A4A	PREDICTED: Bos mutus membrane-spanning 4-domains, subfamily A, member 4A (MS4A4A), transcript variant X2, mRNA	-	-	-	-	GO:0016020//membrane	-	-
XP_005905420	0	389.473	0.001	19.8133	14.2742	4.36e-12	7.24e-10	up	FAR1	PREDICTED: fatty acyl-CoA reductase 1-like [Bos mutus]	Cellular Processes	Transport and catabolism	ko04146//Peroxisome	K13356	-	-	-
XP_005904401	0	1144.24	0.001	19.8033	14.2735	5.03e-20	6.98e-17	up	SEC31A	PREDICTED: protein transport protein Sec31A isoform X2 [Bos mutus]	Genetic Information Processing	Folding, sorting and degradation	ko04141//Protein processing in endoplasmic reticulum	K14005	GO:0043226//organelle;GO:0044464//cell part;GO:0043234//protein complex;GO:0043229//intracellular organelle;GO:0005622//intracellular;GO:0044444//cytoplasmic part;GO:0005783//endoplasmic reticulum;GO:0030133//transport vesicle;GO:0016020//membrane;GO:0005623//cell;GO:0044446//intracellular organelle part;GO:0016023//cytoplasmic, membrane-bounded vesicle;GO:0044425//membrane part;GO:0012505//endom…	GO:0005488//binding;GO:0005515//protein binding	GO:0010038//response to metal ion;GO:0042221//response to chemical;GO:0010035//response to inorganic substance;GO:0050896//response to stimulus
XP_005899877	0.00333333	853.72	0.001	19.8	14.2732	2.43e-11	3.34e-09	up	MANBA	PREDICTED: beta-mannosidase [Bos mutus]	Cellular Processes;Metabolism	Glycan biosynthesis and metabolism;Transport and catabolism	ko04142//Lysosome;ko00511//Other glycan degradation	K01192	-	-	-
XM_005903598	0	241	0.001	19.76	14.2703	5.81e-10	5.46e-08	up	LOC102276499	PREDICTED: Bos mutus phosphate carrier protein, mitochondrial (LOC102276499), mRNA	-	-	-	-	GO:0043227//membrane-bounded organelle;GO:0044421//extracellular region part;GO:0043226//organelle;GO:0005622//intracellular;GO:0044446//intracellular organelle part;GO:0031982//vesicle;GO:1903561//extracellular vesicle;GO:0005623//cell;GO:0070013//intracellular organelle lumen;GO:0044428//nuclear part;GO:0044422//organelle part;GO:0044424//intracellular part;GO:0031967//organelle envelope;GO:004…	GO:0005515//protein binding;GO:0005488//binding	GO:0051234//establishment of localization;GO:0051179//localization
XP_005901708	0	228.983	0.001	19.76	14.2703	4.3e-10	4.18e-08	up	BMI1	polycomb complex protein BMI-1 [Bos taurus]	Cellular Processes	Cellular commiunity	ko04550//Signaling pathways regulating pluripotency of stem cells	K11459	GO:0043226//organelle;GO:0044446//intracellular organelle part;GO:0044451//nucleoplasm part;GO:0005623//cell;GO:0000785//chromatin;GO:0044424//intracellular part;GO:0043233//organelle lumen;GO:0043227//membrane-bounded organelle;GO:0044427//chromosomal part;GO:0005654//nucleoplasm;GO:0044422//organelle part;GO:0031981//nuclear lumen;GO:0044428//nuclear part;GO:0005634//nucleus;GO:1990234//transfe…	GO:0046872//metal ion binding;GO:0097159//organic cyclic compound binding;GO:0003677//DNA binding;GO:0055103//ligase regulator activity;GO:0043169//cation binding;GO:0003682//chromatin binding;GO:0019904//protein domain specific binding;GO:0005488//binding;GO:1901363//heterocyclic compound binding;GO:0098772//molecular function regulator;GO:0043167//ion binding;GO:0044877//macromolecular complex …	GO:0046483//heterocycle metabolic process;GO:0003002//regionalization;GO:0034654//nucleobase-containing compound biosynthetic process;GO:0044767//single-organism developmental process;GO:0051247//positive regulation of protein metabolic process;GO:0065009//regulation of molecular function;GO:0006351//transcription, DNA-templated;GO:0080090//regulation of primary metabolic process;GO:0032944//regu…
XP_005894326	0	278.44	0.001	19.7333	14.2683	4.35e-11	5.6e-09	up	GTF2A1	PREDICTED: transcription initiation factor IIA subunit 1 isoform X1 [Ovis aries]	Genetic Information Processing	Transcription	ko03022//Basal transcription factors	K03122	-	-	-
XM_014483383	0	157.037	0.001	19.73	14.2681	5.87e-07	2.35e-05	up	TEX37	PREDICTED: Bos mutus testis expressed 37 (TEX37), transcript variant X2, mRNA	-	-	-	-	-	-	-
XP_005893355	0	231.877	0.001	19.7133	14.2669	7.08e-10	6.54e-08	up	AAGAB	PREDICTED: alpha- and gamma-adaptin-binding protein p34 [Bos mutus]	-	-	-	-	GO:0044464//cell part;GO:0005622//intracellular;GO:0044424//intracellular part;GO:0005623//cell	-	-
XM_005893468	0	249.617	0.001	19.6933	14.2654	3.3e-08	1.84e-06	up	ASB17	PREDICTED: Bos mutus ankyrin repeat and SOCS box containing 17 (ASB17), transcript variant X1, mRNA	-	-	-	-	-	-	GO:0044238//primary metabolic process;GO:0023052//signaling;GO:0044699//single-organism process;GO:0008152//metabolic process;GO:0032446//protein modification by small protein conjugation;GO:0070647//protein modification by small protein conjugation or removal;GO:0007154//cell communication;GO:0071704//organic substance metabolic process;GO:0044763//single-organism cellular process;GO:0050789//re…
XP_005902770	0	477.163	0.001	19.6667	14.2635	2.64e-12	4.67e-10	up	LRRFIP2	PREDICTED: leucine-rich repeat flightless-interacting protein 2-like, partial [Bos mutus]	-	-	-	-	-	GO:0005515//protein binding;GO:0005488//binding;GO:0019904//protein domain specific binding	GO:0007165//signal transduction;GO:0007154//cell communication;GO:0023052//signaling;GO:0044699//single-organism process;GO:0044763//single-organism cellular process;GO:0044700//single organism signaling;GO:0007166//cell surface receptor signaling pathway;GO:0050794//regulation of cellular process;GO:0065007//biological regulation;GO:0009987//cellular process;GO:0050789//regulation of biological …
XP_005889530	0	1510.73	0.001	19.66	14.263	3.23e-16	1.43e-13	up	CCDC88A	girdin [Bos taurus]	-	-	-	-	GO:0043227//membrane-bounded organelle;GO:0016020//membrane;GO:0043231//intracellular membrane-bounded organelle;GO:0043229//intracellular organelle;GO:0031252//cell leading edge;GO:0044444//cytoplasmic part;GO:0005622//intracellular;GO:0044424//intracellular part;GO:0005623//cell;GO:0043226//organelle;GO:0005737//cytoplasm;GO:0044464//cell part	GO:0019899//enzyme binding;GO:0019900//kinase binding;GO:0005488//binding;GO:0008092//cytoskeletal protein binding;GO:0005515//protein binding;GO:0019901//protein kinase binding;GO:0005543//phospholipid binding;GO:0046983//protein dimerization activity;GO:0015631//tubulin binding;GO:0008289//lipid binding	GO:0050789//regulation of biological process;GO:0060255//regulation of macromolecule metabolic process;GO:0030154//cell differentiation;GO:0010604//positive regulation of macromolecule metabolic process;GO:1902589//single-organism organelle organization;GO:0032501//multicellular organismal process;GO:0043085//positive regulation of catalytic activity;GO:0006928//movement of cell or subcellular co…
XP_014332696	0	1738.24	0.001	19.6533	14.2625	4.35e-20	6.19e-17	up	PCM1	PREDICTED: pericentriolar material 1 protein [Bos mutus]	-	-	-	-	GO:0031967//organelle envelope;GO:0043228//non-membrane-bounded organelle;GO:0044422//organelle part;GO:0005635//nuclear envelope;GO:0044428//nuclear part;GO:0043226//organelle;GO:0031975//envelope;GO:0043229//intracellular organelle;GO:0044424//intracellular part;GO:0005623//cell;GO:0005622//intracellular;GO:0043227//membrane-bounded organelle;GO:0043231//intracellular membrane-bounded organelle…	-	GO:0044707//single-multicellular organism process;GO:0000902//cell morphogenesis;GO:0009987//cellular process;GO:0019827//stem cell population maintenance;GO:0033036//macromolecule localization;GO:0030900//forebrain development;GO:0050793//regulation of developmental process;GO:1902582//single-organism intracellular transport;GO:0021846//cell proliferation in forebrain;GO:0034453//microtubule anc…
XP_005908768	0	1101.84	0.001	19.6467	14.262	5.27e-22	1.12e-18	up	ARHGAP29	PREDICTED: rho GTPase-activating protein 29 [Bos mutus]	-	-	-	-	GO:0044464//cell part;GO:0005623//cell	GO:0043167//ion binding;GO:0005488//binding;GO:0043169//cation binding;GO:0005515//protein binding;GO:0019904//protein domain specific binding	GO:0065009//regulation of molecular function;GO:0043087//regulation of GTPase activity;GO:0065007//biological regulation;GO:0050789//regulation of biological process;GO:0044699//single-organism process;GO:0050896//response to stimulus;GO:0009987//cellular process;GO:0051716//cellular response to stimulus;GO:0044700//single organism signaling;GO:0007154//cell communication;GO:0023052//signaling;GO…
XP_005902438	0	284.457	0.001	19.6167	14.2598	2.51e-10	2.62e-08	up	BLZF1	PREDICTED: golgin-45 [Bos mutus]	-	-	-	-	-	-	-
XP_005904538	0	242.523	0.001	19.5967	14.2583	4.23e-10	4.13e-08	up	NUDT9	PREDICTED: ADP-ribose pyrophosphatase, mitochondrial [Bos mutus]	Metabolism	Nucleotide metabolism	ko00230//Purine metabolism	K13988	GO:1903561//extracellular vesicle;GO:0043230//extracellular organelle;GO:0043227//membrane-bounded organelle;GO:0031982//vesicle;GO:0005576//extracellular region;GO:0043226//organelle;GO:0044421//extracellular region part	GO:0016818//hydrolase activity, acting on acid anhydrides, in phosphorus-containing anhydrides;GO:0017110//nucleoside-diphosphatase activity;GO:0016787//hydrolase activity;GO:0003824//catalytic activity;GO:0016462//pyrophosphatase activity;GO:0016817//hydrolase activity, acting on acid anhydrides	GO:0019637//organophosphate metabolic process;GO:1901575//organic substance catabolic process;GO:0034655//nucleobase-containing compound catabolic process;GO:0006796//phosphate-containing compound metabolic process;GO:0071704//organic substance metabolic process;GO:0072521//purine-containing compound metabolic process;GO:0044712//single-organism catabolic process;GO:0034641//cellular nitrogen com…
XP_005896672	0	382.353	0.001	19.5733	14.2566	3.08e-12	5.35e-10	up	DYNC1LI2	PREDICTED: cytoplasmic dynein 1 light intermediate chain 2 [Bos mutus]	Organismal Systems;Cellular Processes	Excretory system;Transport and catabolism	ko04145//Phagosome;ko04962//Vasopressin-regulated water reabsorption	K10416	GO:0043229//intracellular organelle;GO:0044430//cytoskeletal part;GO:0043232//intracellular non-membrane-bounded organelle;GO:0043226//organelle;GO:0043228//non-membrane-bounded organelle;GO:0005622//intracellular;GO:0044446//intracellular organelle part;GO:1902494//catalytic complex;GO:0044424//intracellular part;GO:0015630//microtubule cytoskeleton;GO:0005856//cytoskeleton;GO:0044464//cell part…	GO:0016817//hydrolase activity, acting on acid anhydrides;GO:0016818//hydrolase activity, acting on acid anhydrides, in phosphorus-containing anhydrides;GO:0016462//pyrophosphatase activity;GO:0003824//catalytic activity;GO:0016787//hydrolase activity;GO:0017111//nucleoside-triphosphatase activity;GO:0003774//motor activity	GO:0007017//microtubule-based process;GO:0044699//single-organism process;GO:0051640//organelle localization;GO:0051641//cellular localization;GO:0009987//cellular process;GO:0051179//localization;GO:0044763//single-organism cellular process
XP_005899383	0	279.947	0.001	19.5667	14.2561	8.78e-11	1.01e-08	up	PRKAR1A	cAMP-dependent protein kinase type I-alpha regulatory subunit [Bos taurus]	Organismal Systems;Cellular Processes	Endocrine system;Cell growth and death	ko04910//Insulin signaling pathway;ko04210//Apoptosis	K04739	GO:0044425//membrane part;GO:0016020//membrane;GO:0044464//cell part;GO:0005622//intracellular;GO:0044424//intracellular part;GO:0044459//plasma membrane part;GO:0045202//synapse;GO:0032991//macromolecular complex;GO:0005623//cell;GO:0005886//plasma membrane;GO:0071944//cell periphery	GO:1901363//heterocyclic compound binding;GO:0097159//organic cyclic compound binding;GO:0030291//protein serine/threonine kinase inhibitor activity;GO:0030551//cyclic nucleotide binding;GO:0044389//ubiquitin-like protein ligase binding;GO:0005488//binding;GO:0005515//protein binding;GO:0051018//protein kinase A binding;GO:0004857//enzyme inhibitor activity;GO:0000166//nucleotide binding;GO:00987…	GO:0070663//regulation of leukocyte proliferation;GO:0044092//negative regulation of molecular function;GO:0002682//regulation of immune system process;GO:0031324//negative regulation of cellular metabolic process;GO:0044707//single-multicellular organism process;GO:0032944//regulation of mononuclear cell proliferation;GO:0071900//regulation of protein serine/threonine kinase activity;GO:0030029/…
XP_005888096	0	433.037	0.001	19.3567	14.2405	3.54e-06	0.000112291	up	NEURL1	PREDICTED: neuralized-like protein 1A [Bos mutus]	-	-	-	-	GO:0097458//neuron part;GO:0045202//synapse;GO:0016020//membrane;GO:0060076//excitatory synapse;GO:0044297//cell body;GO:0005622//intracellular;GO:0043025//neuronal cell body;GO:0030425//dendrite;GO:0044464//cell part;GO:0043005//neuron projection;GO:0042995//cell projection;GO:0044424//intracellular part;GO:0036477//somatodendritic compartment;GO:0005623//cell	GO:0043169//cation binding;GO:0004842//ubiquitin-protein transferase activity;GO:0016740//transferase activity;GO:0045182//translation regulator activity;GO:0043167//ion binding;GO:0046872//metal ion binding;GO:0046914//transition metal ion binding;GO:0003824//catalytic activity;GO:0019787//ubiquitin-like protein transferase activity;GO:0005488//binding	GO:0016358//dendrite development;GO:0016043//cellular component organization;GO:0031399//regulation of protein modification process;GO:0022414//reproductive process;GO:0070647//protein modification by small protein conjugation or removal;GO:0048169//regulation of long-term neuronal synaptic plasticity;GO:0032501//multicellular organismal process;GO:0048731//system development;GO:0048666//neuron d…
XP_005887421	0	1032.19	0.001	19.3467	14.2398	5.11e-07	2.07e-05	up	KTN1	PREDICTED: kinectin isoform X5 [Bos mutus]	-	-	-	-	-	-	-
XP_005888828	0	311.047	0.001	19.2867	14.2353	8.55e-06	0.000243672	up	TFDP2	PREDICTED: transcription factor Dp-2 isoform X2 [Bos taurus]	Cellular Processes	Cell growth and death	ko04110//Cell cycle	K09392	-	-	-
XP_005889525	0	664.83	0.001	19.0267	14.2157	8.74e-17	4.53e-14	up	PPP4R3B	PREDICTED: serine/threonine-protein phosphatase 4 regulatory subunit 3B isoform X1 [Bos mutus]	Organismal Systems	Endocrine system	ko04922//Glucagon signaling pathway	K17491	GO:0005623//cell;GO:0031981//nuclear lumen;GO:0005856//cytoskeleton;GO:0044428//nuclear part;GO:0043226//organelle;GO:0044422//organelle part;GO:0044446//intracellular organelle part;GO:0043232//intracellular non-membrane-bounded organelle;GO:0032991//macromolecular complex;GO:0043228//non-membrane-bounded organelle;GO:0043229//intracellular organelle;GO:0031974//membrane-enclosed lumen;GO:004323…	-	GO:0019318//hexose metabolic process;GO:0009987//cellular process;GO:0046364//monosaccharide biosynthetic process;GO:0043412//macromolecule modification;GO:0005975//carbohydrate metabolic process;GO:0044237//cellular metabolic process;GO:0044267//cellular protein metabolic process;GO:0019538//protein metabolic process;GO:0044283//small molecule biosynthetic process;GO:0009058//biosynthetic proces…
XP_005894782	0	68.1133	0.001	19.0133	14.2147	8.16e-06	0.000234523	up	RNF11	RING finger protein 11 [Homo sapiens]	-	-	-	-	GO:0005622//intracellular;GO:0043230//extracellular organelle;GO:0043229//intracellular organelle;GO:0044424//intracellular part;GO:0043226//organelle;GO:0012505//endomembrane system;GO:0005737//cytoplasm;GO:0031982//vesicle;GO:0005623//cell;GO:0043227//membrane-bounded organelle;GO:0043231//intracellular membrane-bounded organelle;GO:1903561//extracellular vesicle;GO:0044444//cytoplasmic part;GO…	GO:0043167//ion binding;GO:0005488//binding;GO:0019787//ubiquitin-like protein transferase activity;GO:0097159//organic cyclic compound binding;GO:0003676//nucleic acid binding;GO:0016740//transferase activity;GO:0003824//catalytic activity;GO:0046872//metal ion binding;GO:0046914//transition metal ion binding;GO:1901363//heterocyclic compound binding;GO:0043169//cation binding	GO:0008152//metabolic process;GO:0016567//protein ubiquitination;GO:0044265//cellular macromolecule catabolic process;GO:0043632//modification-dependent macromolecule catabolic process;GO:0070647//protein modification by small protein conjugation or removal;GO:0019941//modification-dependent protein catabolic process;GO:0044248//cellular catabolic process;GO:0006508//proteolysis;GO:0030163//prote…
XM_005904918	0	306.453	0.001	19.0033	14.214	3.52e-09	2.63e-07	up	TSSK4	PREDICTED: Bos mutus testis-specific serine kinase 4 (TSSK4), transcript variant X2, mRNA	-	-	-	-	-	-	-
XP_005891505	0.00666667	769.613	0.001	18.9067	14.2066	2.72e-19	2.96e-16	up	TUBGCP2	PREDICTED: gamma-tubulin complex component 2 isoform X2 [Bos mutus]	-	-	-	-	-	-	-
XM_014478908	0	151.697	0.001	18.9	14.2061	1.93e-06	6.68e-05	up	LOC102277888	PREDICTED: Bos mutus IQ domain-containing protein F5-like (LOC102277888), transcript variant X2, mRNA	-	-	-	-	-	-	-
XP_005900446	0	439.107	0.001	18.82	14.2	2.8e-06	9.2e-05	up	RSPH3	PREDICTED: radial spoke head protein 3 homolog [Bos mutus]	-	-	-	-	-	-	-
XM_005910203	0	934.667	0.001	18.7567	14.1951	4.29e-18	3.4e-15	up	POM121L2	PREDICTED: Bos mutus POM121 transmembrane nucleoporin-like 2 (POM121L2), mRNA	Genetic Information Processing	Translation	ko03013//RNA transport	K14316	-	-	-
XM_005909024	0	105.533	0.001	18.6533	14.1871	1.7e-06	6e-05	up	LOC102284755	PREDICTED: Bos mutus histone H2A-Bbd type 2/3 (LOC102284755), mRNA	-	-	-	-	GO:0043228//non-membrane-bounded organelle;GO:0005694//chromosome;GO:0005622//intracellular;GO:0043226//organelle;GO:0043227//membrane-bounded organelle;GO:0005623//cell;GO:0044424//intracellular part;GO:0043231//intracellular membrane-bounded organelle;GO:0044464//cell part;GO:0043229//intracellular organelle;GO:0043232//intracellular non-membrane-bounded organelle	GO:0005515//protein binding;GO:0046983//protein dimerization activity;GO:0005488//binding	-
XP_005898965	0	330.53	0.001	18.6067	14.1835	7.57e-06	0.000219812	up	LOC102265612	PREDICTED: cytoplasmic polyadenylation element-binding protein 2 isoform X2 [Pantholops hodgsonii]	Organismal Systems;Cellular Processes	Endocrine system;Cell growth and death;Development	ko04114//Oocyte meiosis;ko04914//Progesterone-mediated oocyte maturation;ko04320//Dorso-ventral axis formation	K02602	-	-	-
XP_005908591	0	405.453	0.001	18.55	14.1791	9.44e-12	1.47e-09	up	OSBP2	Oxysterol-binding protein 2, partial [Bos mutus]	-	-	-	-	GO:0097458//neuron part;GO:0042995//cell projection;GO:0005623//cell;GO:0043005//neuron projection;GO:0030425//dendrite;GO:0044464//cell part;GO:0036477//somatodendritic compartment	GO:0005488//binding;GO:0005496//steroid binding;GO:0008289//lipid binding;GO:0097159//organic cyclic compound binding;GO:0032934//sterol binding	GO:0044767//single-organism developmental process;GO:0007276//gamete generation;GO:0051704//multi-organism process;GO:0009987//cellular process;GO:0022412//cellular process involved in reproduction in multicellular organism;GO:0030154//cell differentiation;GO:0044702//single organism reproductive process;GO:0032502//developmental process;GO:0007281//germ cell development;GO:0048869//cellular deve…
XM_005911539	0	153.667	0.001	18.45	14.1713	2.21e-07	9.94e-06	up	LOC102270856	PREDICTED: Bos mutus histone H2B 1/2 (LOC102270856), mRNA	-	-	-	-	GO:0000785//chromatin;GO:0005694//chromosome;GO:0043229//intracellular organelle;GO:0005623//cell;GO:0043226//organelle;GO:0044446//intracellular organelle part;GO:0032991//macromolecular complex;GO:0043232//intracellular non-membrane-bounded organelle;GO:0044424//intracellular part;GO:0044464//cell part;GO:0044422//organelle part;GO:0043228//non-membrane-bounded organelle;GO:0043227//membrane-bo…	GO:1901363//heterocyclic compound binding;GO:0005515//protein binding;GO:0003676//nucleic acid binding;GO:0005488//binding;GO:0097159//organic cyclic compound binding;GO:0046983//protein dimerization activity	-
XP_005889882	0	325.67	0.001	18.4	14.1674	6.93e-10	6.41e-08	up	RDX	PREDICTED: radixin isoform X3 [Bos mutus]	Cellular Processes	Cell motility	ko04810//Regulation of actin cytoskeleton	K05762	GO:0005886//plasma membrane;GO:0043227//membrane-bounded organelle;GO:0005623//cell;GO:0044425//membrane part;GO:0005856//cytoskeleton;GO:0032155//cell division site part;GO:0043228//non-membrane-bounded organelle;GO:0044421//extracellular region part;GO:0071944//cell periphery;GO:0043232//intracellular non-membrane-bounded organelle;GO:1903561//extracellular vesicle;GO:0032421//stereocilium bund…	GO:1901363//heterocyclic compound binding;GO:0005515//protein binding;GO:0046983//protein dimerization activity;GO:0008092//cytoskeletal protein binding;GO:0019899//enzyme binding;GO:0003676//nucleic acid binding;GO:0005488//binding;GO:0003723//RNA binding;GO:0097159//organic cyclic compound binding	GO:0009896//positive regulation of catabolic process;GO:0050794//regulation of cellular process;GO:0022407//regulation of cell-cell adhesion;GO:0009893//positive regulation of metabolic process;GO:0034613//cellular protein localization;GO:0006928//movement of cell or subcellular component;GO:0034330//cell junction organization;GO:0065007//biological regulation;GO:0036010//protein localization to …
XP_005903091	0	322.01	0.001	18.2233	14.1535	2.04e-11	2.9e-09	up	DCAF12	DDB1- and CUL4-associated factor 12 [Bos taurus]	-	-	-	-	GO:0043228//non-membrane-bounded organelle;GO:0044464//cell part;GO:0043226//organelle;GO:0043229//intracellular organelle;GO:0044446//intracellular organelle part;GO:0005623//cell;GO:1990234//transferase complex;GO:0043234//protein complex;GO:0043232//intracellular non-membrane-bounded organelle;GO:0015630//microtubule cytoskeleton;GO:0005622//intracellular;GO:0005856//cytoskeleton;GO:0044430//c…	-	GO:0044267//cellular protein metabolic process;GO:0044238//primary metabolic process;GO:0036211//protein modification process;GO:0043170//macromolecule metabolic process;GO:0019538//protein metabolic process;GO:0009987//cellular process;GO:0032446//protein modification by small protein conjugation;GO:0070647//protein modification by small protein conjugation or removal;GO:0043412//macromolecule m…
XP_005902314	0	686.077	0.001	18.22	14.1532	1.82e-06	6.34e-05	up	CUL4A	PREDICTED: cullin-4A [Bos mutus]	Genetic Information Processing	Folding, sorting and degradation;Replication and repair	ko04120//Ubiquitin mediated proteolysis;ko03420//Nucleotide excision repair	K10609	-	-	-
XP_005907831	0	458.493	0.001	18.08	14.1421	3.45e-11	4.57e-09	up	UBA2	SUMO-activating enzyme subunit 2, partial [Bos mutus]	Genetic Information Processing	Folding, sorting and degradation	ko04120//Ubiquitin mediated proteolysis	K10685	-	-	-
XP_005908344	0	847.423	0.001	18	14.1357	1.18e-14	3.68e-12	up	SMARCA1	PREDICTED: probable global transcription activator SNF2L1-like isoform X1 [Bos mutus]	-	-	-	-	GO:0070603//SWI/SNF superfamily-type complex;GO:0044428//nuclear part;GO:0043231//intracellular membrane-bounded organelle;GO:0043229//intracellular organelle;GO:0043227//membrane-bounded organelle;GO:0043226//organelle;GO:0005694//chromosome;GO:0005622//intracellular;GO:0044427//chromosomal part;GO:0031010//ISWI-type complex;GO:0044422//organelle part;GO:0043232//intracellular non-membrane-bound…	GO:0016787//hydrolase activity;GO:0003676//nucleic acid binding;GO:0097159//organic cyclic compound binding;GO:0017111//nucleoside-triphosphatase activity;GO:0016887//ATPase activity;GO:0005488//binding;GO:0003824//catalytic activity;GO:0001883//purine nucleoside binding;GO:0032549//ribonucleoside binding;GO:1901363//heterocyclic compound binding;GO:0042623//ATPase activity, coupled;GO:0016818//h…	GO:0090304//nucleic acid metabolic process;GO:0044271//cellular nitrogen compound biosynthetic process;GO:0042127//regulation of cell proliferation;GO:0097659//nucleic acid-templated transcription;GO:0007417//central nervous system development;GO:0007275//multicellular organism development;GO:0009058//biosynthetic process;GO:0050789//regulation of biological process;GO:0006259//DNA metabolic proc…
XM_014483520	0	164.323	0.001	17.9767	14.1338	7.51e-05	0.00155255	up	VWA3B	PREDICTED: Bos mutus von Willebrand factor A domain containing 3B (VWA3B), partial mRNA	-	-	-	-	-	-	-
XM_005890651	0	280.667	0.001	17.9267	14.1298	4.52e-09	3.3e-07	up	LOC102273581	PREDICTED: Bos mutus heat shock transcription factor, X-linked-like (LOC102273581), mRNA	-	-	-	-	GO:0005623//cell;GO:0044464//cell part;GO:0043227//membrane-bounded organelle;GO:0043226//organelle;GO:0043231//intracellular membrane-bounded organelle;GO:0043229//intracellular organelle;GO:0005622//intracellular;GO:0044424//intracellular part	GO:0097159//organic cyclic compound binding;GO:0003676//nucleic acid binding;GO:0001071//nucleic acid binding transcription factor activity;GO:0003677//DNA binding;GO:1901363//heterocyclic compound binding;GO:0005488//binding	GO:0018130//heterocycle biosynthetic process;GO:0006807//nitrogen compound metabolic process;GO:0032774//RNA biosynthetic process;GO:0019438//aromatic compound biosynthetic process;GO:0009987//cellular process;GO:0006351//transcription, DNA-templated;GO:0071704//organic substance metabolic process;GO:0009059//macromolecule biosynthetic process;GO:0097659//nucleic acid-templated transcription;GO:0…
XP_014337083	0	235.857	0.001	17.9233	14.1296	4.19e-10	4.1e-08	up	KHDRBS1	PREDICTED: KH domain-containing, RNA-binding, signal transduction-associated protein 1 [Saimiri boliviensis boliviensis]	-	-	-	-	GO:0043234//protein complex;GO:0016020//membrane;GO:0044464//cell part;GO:0044444//cytoplasmic part;GO:0071944//cell periphery;GO:0044422//organelle part;GO:0005623//cell;GO:0031981//nuclear lumen;GO:0031974//membrane-enclosed lumen;GO:0043233//organelle lumen;GO:0044459//plasma membrane part;GO:0044425//membrane part;GO:0005737//cytoplasm;GO:0098797//plasma membrane protein complex;GO:0044446//i…	GO:0003723//RNA binding;GO:0003727//single-stranded RNA binding;GO:1901363//heterocyclic compound binding;GO:0019904//protein domain specific binding;GO:0005488//binding;GO:0005515//protein binding;GO:0008187//poly-pyrimidine tract binding;GO:0097159//organic cyclic compound binding;GO:0030674//protein binding, bridging;GO:0070717//poly-purine tract binding;GO:0003676//nucleic acid binding;GO:006…	GO:0006725//cellular aromatic compound metabolic process;GO:1901360//organic cyclic compound metabolic process;GO:0006413//translational initiation;GO:0034641//cellular nitrogen compound metabolic process;GO:0051169//nuclear transport;GO:0071705//nitrogen compound transport;GO:0034654//nucleobase-containing compound biosynthetic process;GO:0051234//establishment of localization;GO:0022402//cell c…
XM_005910276	0	247.723	0.001	17.9167	14.129	8.96e-09	6.07e-07	up	TBC1D21	PREDICTED: Bos mutus TBC1 domain family, member 21 (TBC1D21), transcript variant X3, mRNA	-	-	-	-	-	-	-
XP_005891494	0	600.347	0.001	17.76	14.1163	9.19e-15	2.93e-12	up	TAX1BP1	tax1-binding protein 1 homolog [Bos taurus]	-	-	-	-	GO:0043226//organelle;GO:0031982//vesicle;GO:1903561//extracellular vesicle;GO:0044421//extracellular region part;GO:0043227//membrane-bounded organelle;GO:0005576//extracellular region;GO:0043230//extracellular organelle	GO:0019899//enzyme binding;GO:0043167//ion binding;GO:0005515//protein binding;GO:0005488//binding;GO:0043169//cation binding	GO:0009889//regulation of biosynthetic process;GO:0044092//negative regulation of molecular function;GO:0065009//regulation of molecular function;GO:0051090//regulation of sequence-specific DNA binding transcription factor activity;GO:0051171//regulation of nitrogen compound metabolic process;GO:0050794//regulation of cellular process;GO:0050789//regulation of biological process;GO:2001141//regul…
XP_005898384	0	392.457	0.001	17.72	14.1131	1.24e-05	0.000336918	up	ISYNA1	PREDICTED: inositol-3-phosphate synthase 1-like isoform X2 [Bos mutus]	Metabolism	Carbohydrate metabolism	ko00562//Inositol phosphate metabolism	K01858	GO:0005623//cell;GO:0005622//intracellular;GO:0044464//cell part;GO:0044424//intracellular part	GO:0003824//catalytic activity	GO:0006793//phosphorus metabolic process;GO:0071704//organic substance metabolic process;GO:0044723//single-organism carbohydrate metabolic process;GO:0044763//single-organism cellular process;GO:0044699//single-organism process;GO:0044262//cellular carbohydrate metabolic process;GO:0044281//small molecule metabolic process;GO:0044710//single-organism metabolic process;GO:0044238//primary metabol…
XP_005899214	0	268.36	0.001	17.5967	14.103	4.07e-10	4e-08	up	CCNI	PREDICTED: cyclin-I [Bos mutus]	-	-	-	-	-	-	-
XM_005892261	0	216.697	0.001	17.5133	14.0962	5.62e-08	2.97e-06	up	FHL5	PREDICTED: Bos mutus four and a half LIM domains 5 (FHL5), mRNA	-	-	-	-	GO:0043226//organelle;GO:0043227//membrane-bounded organelle;GO:0005623//cell;GO:0044464//cell part;GO:0043231//intracellular membrane-bounded organelle;GO:0044424//intracellular part;GO:0005622//intracellular;GO:0043229//intracellular organelle	GO:0043169//cation binding;GO:0046914//transition metal ion binding;GO:0005488//binding;GO:0046872//metal ion binding;GO:0043167//ion binding	GO:1901360//organic cyclic compound metabolic process;GO:0006139//nucleobase-containing compound metabolic process;GO:0044271//cellular nitrogen compound biosynthetic process;GO:0044237//cellular metabolic process;GO:0034641//cellular nitrogen compound metabolic process;GO:0019438//aromatic compound biosynthetic process;GO:0009059//macromolecule biosynthetic process;GO:0009987//cellular process;G…
XP_005911305	0	487.547	0.001	17.4433	14.0904	6.35e-14	1.65e-11	up	RALBP1	PREDICTED: ralA-binding protein 1 [Bos taurus]	Environmental Information Processing	Signal transduction	ko04014//Ras signaling pathway	K08773	-	-	-
XP_005911721	0	120.49	0.001	17.4433	14.0904	1.81e-07	8.36e-06	up	TSN	translin [Bos taurus]	-	-	-	-	-	-	-
XP_005903197	0	197.78	0.001	17.37	14.0843	2.72e-08	1.56e-06	up	EIF2S2	PREDICTED: eukaryotic translation initiation factor 2 subunit 2 isoform X1 [Bos mutus]	Genetic Information Processing	Translation	ko03013//RNA transport	K03238	GO:0005622//intracellular;GO:0044424//intracellular part;GO:0005623//cell;GO:0044464//cell part	GO:0043167//ion binding;GO:0003723//RNA binding;GO:0008135//translation factor activity, RNA binding;GO:0005488//binding;GO:0003676//nucleic acid binding;GO:0043169//cation binding;GO:0097159//organic cyclic compound binding;GO:1901363//heterocyclic compound binding	GO:0048609//multicellular organismal reproductive process;GO:0044237//cellular metabolic process;GO:0043604//amide biosynthetic process;GO:0043170//macromolecule metabolic process;GO:0044260//cellular macromolecule metabolic process;GO:0044249//cellular biosynthetic process;GO:0043603//cellular amide metabolic process;GO:0032502//developmental process;GO:0009059//macromolecule biosynthetic proces…
XP_005899822	0	247.263	0.001	17.3433	14.0821	4.45e-10	4.31e-08	up	LOC102269563	PREDICTED: LUC7-like 2 isoform X4 [Rattus norvegicus]	-	-	-	-	-	-	-
XP_005896468	0	190.053	0.001	17.33	14.081	2.1e-08	1.25e-06	up	FAIM2	protein lifeguard 2 [Bos taurus]	-	-	-	-	GO:0044464//cell part;GO:0044425//membrane part;GO:0045202//synapse;GO:0098589//membrane region;GO:0005623//cell;GO:0098590//plasma membrane region;GO:0044456//synapse part;GO:0016020//membrane;GO:0097060//synaptic membrane;GO:0098805//whole membrane;GO:0098857//membrane microdomain;GO:0071944//cell periphery;GO:0044459//plasma membrane part;GO:0005886//plasma membrane;GO:0031224//intrinsic compo…	-	GO:0048731//system development;GO:0021533//cell differentiation in hindbrain;GO:0032502//developmental process;GO:0050789//regulation of biological process;GO:0048519//negative regulation of biological process;GO:0021549//cerebellum development;GO:0048513//animal organ development;GO:0044767//single-organism developmental process;GO:0022037//metencephalon development;GO:0030154//cell differentiat…
XP_005903048	0	733.383	0.001	17.31	14.0793	3.62e-15	1.27e-12	up	CDCA2	PREDICTED: LOW QUALITY PROTEIN: cell division cycle-associated protein 2 [Bos mutus]	-	-	-	-	GO:0043226//organelle;GO:0005622//intracellular;GO:0044424//intracellular part;GO:0043228//non-membrane-bounded organelle;GO:0043229//intracellular organelle;GO:0005623//cell;GO:0044464//cell part;GO:0043232//intracellular non-membrane-bounded organelle	-	GO:0044260//cellular macromolecule metabolic process;GO:0006793//phosphorus metabolic process;GO:0043412//macromolecule modification;GO:0036211//protein modification process;GO:0006470//protein dephosphorylation;GO:0019538//protein metabolic process;GO:0044267//cellular protein metabolic process;GO:0006464//cellular protein modification process;GO:0000278//mitotic cell cycle;GO:0009987//cellular …
XP_005890739	0	662.943	0.001	17.28	14.0768	7e-18	5.17e-15	up	UBE3A	ubiquitin-protein ligase E3A [Bos taurus]	Genetic Information Processing	Folding, sorting and degradation	ko04120//Ubiquitin mediated proteolysis	K10587	-	-	-
XP_014333690	0	488.293	0.001	17.2333	14.0729	2.34e-14	6.72e-12	up	EWSR1	PREDICTED: RNA-binding protein EWS [Bos mutus]	-	-	-	-	GO:0043233//organelle lumen;GO:0044428//nuclear part;GO:0043227//membrane-bounded organelle;GO:0005623//cell;GO:0043229//intracellular organelle;GO:0044424//intracellular part;GO:0005634//nucleus;GO:0005622//intracellular;GO:0016020//membrane;GO:0031981//nuclear lumen;GO:0070013//intracellular organelle lumen;GO:0031974//membrane-enclosed lumen;GO:0043231//intracellular membrane-bounded organelle…	GO:1901363//heterocyclic compound binding;GO:0043167//ion binding;GO:0003723//RNA binding;GO:0097159//organic cyclic compound binding;GO:0005515//protein binding;GO:0043169//cation binding;GO:0005488//binding;GO:0046914//transition metal ion binding;GO:0046872//metal ion binding;GO:0003676//nucleic acid binding	GO:0019438//aromatic compound biosynthetic process;GO:0006725//cellular aromatic compound metabolic process;GO:1901576//organic substance biosynthetic process;GO:0097659//nucleic acid-templated transcription;GO:0009987//cellular process;GO:0044271//cellular nitrogen compound biosynthetic process;GO:0044249//cellular biosynthetic process;GO:0034645//cellular macromolecule biosynthetic process;GO:0…
XP_005908205	0	166.977	0.001	17.22	14.0718	1.4e-07	6.66e-06	up	MED4	PREDICTED: mediator of RNA polymerase II transcription subunit 4 [Bos mutus]	Organismal Systems	Endocrine system	ko04919//Thyroid hormone signaling pathway	K15146	-	-	-
XM_014478542	0	296.44	0.001	17.2133	14.0712	3.97e-08	2.17e-06	up	SPERT	PREDICTED: Bos mutus spermatid associated (SPERT), transcript variant X2, mRNA	-	-	-	-	-	-	-
XP_005887017	0	54.3167	0.001	17.1	14.0617	2.77e-05	0.000670402	up	GBAS	PREDICTED: protein NipSnap homolog 2 [Bos mutus]	-	-	-	-	-	-	GO:0009260//ribonucleotide biosynthetic process;GO:0009117//nucleotide metabolic process;GO:0072522//purine-containing compound biosynthetic process;GO:0006753//nucleoside phosphate metabolic process;GO:0019438//aromatic compound biosynthetic process;GO:0006164//purine nucleotide biosynthetic process;GO:0009058//biosynthetic process;GO:0006725//cellular aromatic compound metabolic process;GO:0009…
XP_005899358	0	554.897	0.001	17.0433	14.0569	3.3e-15	1.17e-12	up	CAST	PREDICTED: calpastatin isoform X1 [Bos mutus]	-	-	-	-	GO:0043226//organelle;GO:0005737//cytoplasm;GO:0005622//intracellular;GO:0044424//intracellular part;GO:0044464//cell part;GO:0043229//intracellular organelle;GO:0044444//cytoplasmic part;GO:0043227//membrane-bounded organelle;GO:0005623//cell;GO:0043231//intracellular membrane-bounded organelle	GO:0003723//RNA binding;GO:0030414//peptidase inhibitor activity;GO:0097159//organic cyclic compound binding;GO:0004857//enzyme inhibitor activity;GO:0098772//molecular function regulator;GO:0030234//enzyme regulator activity;GO:0004866//endopeptidase inhibitor activity;GO:0003676//nucleic acid binding;GO:0061135//endopeptidase regulator activity;GO:1901363//heterocyclic compound binding;GO:00054…	GO:0031324//negative regulation of cellular metabolic process;GO:0051248//negative regulation of protein metabolic process;GO:0048519//negative regulation of biological process;GO:0060255//regulation of macromolecule metabolic process;GO:0065009//regulation of molecular function;GO:0048523//negative regulation of cellular process;GO:0065007//biological regulation;GO:0051346//negative regulation o…
XP_005887545	0	66.5567	0.001	16.9667	14.0504	2.31e-05	0.000572613	up	CCDC117	PREDICTED: coiled-coil domain-containing protein 117 [Bos mutus]	-	-	-	-	-	-	-
XP_005910636	0	547.527	0.001	16.9133	14.0459	1.03e-15	4.07e-13	up	NEDD4L	PREDICTED: E3 ubiquitin-protein ligase NEDD4-like isoform X13 [Ovis aries musimon]	Cellular Processes;Organismal Systems;Genetic Information Processing	Transport and catabolism;Folding, sorting and degradation;Excretory system	ko04144//Endocytosis;ko04120//Ubiquitin mediated proteolysis;ko04960//Aldosterone-regulated sodium reabsorption	K13305	-	-	-
XP_005890374	0	561.917	0.001	16.82	14.0379	7.45e-15	2.45e-12	up	SPATA20	PREDICTED: spermatogenesis-associated protein 20 isoform X1 [Bos taurus]	-	-	-	-	-	-	-
XM_014479303	0	161	0.001	16.7933	14.0356	3.65e-07	1.54e-05	up	LOC102273810	PREDICTED: Bos mutus uncharacterized LOC102273810 (LOC102273810), mRNA	-	-	-	-	-	-	-
XP_005892886	0	119.677	0.001	16.7733	14.0339	2.51e-07	1.11e-05	up	YWHAG	PREDICTED: 14-3-3 protein gamma [Dasypus novemcinctus]	Environmental Information Processing;Cellular Processes	Cell growth and death;Signal transduction	ko04151//PI3K-Akt signaling pathway;ko04390//Hippo signaling pathway;ko04114//Oocyte meiosis;ko04110//Cell cycle	K16198	GO:0044424//intracellular part;GO:0005912//adherens junction;GO:0030055//cell-substrate junction;GO:0070161//anchoring junction;GO:0005622//intracellular;GO:0016020//membrane;GO:0044464//cell part;GO:0005737//cytoplasm;GO:0005924//cell-substrate adherens junction;GO:0043230//extracellular organelle;GO:0043231//intracellular membrane-bounded organelle;GO:0031090//organelle membrane;GO:0031982//ves…	GO:0005102//receptor binding;GO:0004857//enzyme inhibitor activity;GO:0098772//molecular function regulator;GO:0005515//protein binding;GO:0019210//kinase inhibitor activity;GO:0030291//protein serine/threonine kinase inhibitor activity;GO:0004860//protein kinase inhibitor activity;GO:0019887//protein kinase regulator activity;GO:0019901//protein kinase binding;GO:0003676//nucleic acid binding;GO…	GO:0007165//signal transduction;GO:0019222//regulation of metabolic process;GO:0051246//regulation of protein metabolic process;GO:0061024//membrane organization;GO:0051204//protein insertion into mitochondrial membrane;GO:0050789//regulation of biological process;GO:0048519//negative regulation of biological process;GO:0048699//generation of neurons;GO:0048856//anatomical structure development;G…
XP_005887167	0	851.323	0.001	16.73	14.0301	4.55e-07	1.87e-05	up	HIPK1	PREDICTED: homeodomain-interacting protein kinase 1 [Bos mutus]	-	-	-	-	GO:0044446//intracellular organelle part;GO:0043229//intracellular organelle;GO:0044428//nuclear part;GO:0043226//organelle;GO:0044424//intracellular part;GO:0016604//nuclear body;GO:0005622//intracellular;GO:0043233//organelle lumen;GO:0044451//nucleoplasm part;GO:0005654//nucleoplasm;GO:0031981//nuclear lumen;GO:0070013//intracellular organelle lumen;GO:0005623//cell;GO:0043231//intracellular m…	GO:0001883//purine nucleoside binding;GO:0097367//carbohydrate derivative binding;GO:0001882//nucleoside binding;GO:0005488//binding;GO:0003824//catalytic activity;GO:0016772//transferase activity, transferring phosphorus-containing groups;GO:0032549//ribonucleoside binding;GO:0036094//small molecule binding;GO:1901363//heterocyclic compound binding;GO:0097159//organic cyclic compound binding;GO:…	GO:0008283//cell proliferation;GO:0008219//cell death;GO:0048513//animal organ development;GO:0034329//cell junction assembly;GO:0044707//single-multicellular organism process;GO:0019538//protein metabolic process;GO:0007275//multicellular organism development;GO:0044700//single organism signaling;GO:0009966//regulation of signal transduction;GO:0034330//cell junction organization;GO:0006915//apo…
XP_005908119	0	192.8	0.001	16.65	14.0232	2.13e-08	1.26e-06	up	GINM1	PREDICTED: glycoprotein integral membrane protein 1 isoform X1 [Bos mutus]	-	-	-	-	GO:0043226//organelle;GO:0043227//membrane-bounded organelle;GO:0016020//membrane;GO:0044425//membrane part;GO:0043230//extracellular organelle;GO:0031982//vesicle;GO:0031224//intrinsic component of membrane;GO:0005576//extracellular region;GO:0044421//extracellular region part;GO:1903561//extracellular vesicle	-	-
XM_005904636	0	592.667	0.001	16.6333	14.0218	2.9e-12	5.06e-10	up	FSCB	PREDICTED: Bos mutus fibrous sheath CABYR binding protein (FSCB), mRNA	-	-	-	-	GO:0042995//cell projection;GO:0044464//cell part;GO:0005623//cell	-	-
XP_005898909	0	374.493	0.001	16.5867	14.0177	4.04e-12	6.81e-10	up	TM9SF3	PREDICTED: transmembrane 9 superfamily member 3 isoform X1 [Rattus norvegicus]	-	-	-	-	-	-	-
XP_005891246	0	198.9	0.001	16.5667	14.016	4.24e-05	0.000960505	up	SRR	PREDICTED: LOW QUALITY PROTEIN: serine racemase [Bos mutus]	Metabolism	Amino acid metabolism	ko00260//Glycine, serine and threonine metabolism	K12235	-	-	-
XM_005900030	0	298.743	0.001	16.5633	14.0157	9.96e-09	6.58e-07	up	SPAG4	PREDICTED: Bos mutus sperm associated antigen 4 (SPAG4), transcript variant X2, mRNA	-	-	-	-	-	-	-
XM_005910999	0	416.76	0.001	16.5567	14.0151	2.09e-12	3.84e-10	up	TRIM69	PREDICTED: Bos mutus tripartite motif containing 69 (TRIM69), transcript variant X1, mRNA	-	-	-	-	GO:0044424//intracellular part;GO:0044446//intracellular organelle part;GO:0044464//cell part;GO:0043226//organelle;GO:0070013//intracellular organelle lumen;GO:0043233//organelle lumen;GO:0043231//intracellular membrane-bounded organelle;GO:0005622//intracellular;GO:0031981//nuclear lumen;GO:0005654//nucleoplasm;GO:0016020//membrane;GO:0044451//nucleoplasm part;GO:0016604//nuclear body;GO:004322…	GO:0043169//cation binding;GO:0005488//binding;GO:0043167//ion binding;GO:0046872//metal ion binding;GO:0046914//transition metal ion binding	GO:0032446//protein modification by small protein conjugation;GO:0009987//cellular process;GO:0044238//primary metabolic process;GO:0036211//protein modification process;GO:0008152//metabolic process;GO:0071704//organic substance metabolic process;GO:0070647//protein modification by small protein conjugation or removal;GO:0006464//cellular protein modification process;GO:0044237//cellular metabol…
XP_005910003	0	297.2	0.001	16.5567	14.0151	5.05e-10	4.83e-08	up	RBBP7	histone-binding protein RBBP7 [Bos taurus]	-	-	-	-	GO:0005623//cell;GO:0043233//organelle lumen;GO:0043227//membrane-bounded organelle;GO:0044422//organelle part;GO:0043231//intracellular membrane-bounded organelle;GO:0031981//nuclear lumen;GO:0043229//intracellular organelle;GO:0000118//histone deacetylase complex;GO:0005654//nucleoplasm;GO:0070013//intracellular organelle lumen;GO:0043226//organelle;GO:0044446//intracellular organelle part;GO:0…	GO:0003824//catalytic activity;GO:0097159//organic cyclic compound binding;GO:0005488//binding;GO:0016787//hydrolase activity;GO:0016811//hydrolase activity, acting on carbon-nitrogen (but not peptide) bonds, in linear amides;GO:0016810//hydrolase activity, acting on carbon-nitrogen (but not peptide) bonds;GO:1901363//heterocyclic compound binding;GO:0003676//nucleic acid binding	GO:0009058//biosynthetic process;GO:0009628//response to abiotic stimulus;GO:0010467//gene expression;GO:0043044//ATP-dependent chromatin remodeling;GO:0060255//regulation of macromolecule metabolic process;GO:0006950//response to stress;GO:0010605//negative regulation of macromolecule metabolic process;GO:0010033//response to organic substance;GO:0032501//multicellular organismal process;GO:0044…
XP_005901649	0	256.56	0.001	16.55	14.0145	3.58e-09	2.66e-07	up	SMARCB1	PREDICTED: SWI/SNF-related matrix-associated actin-dependent regulator of chromatin subfamily B member 1 isoform X1 [Bos mutus]	-	-	-	-	-	-	-
XP_005910079	0	250.057	0.001	16.5033	14.0105	8.41e-10	7.61e-08	up	ILF2	interleukin enhancer-binding factor 2 [Mus musculus]	-	-	-	-	GO:0043226//organelle;GO:0070013//intracellular organelle lumen;GO:0031981//nuclear lumen;GO:0043227//membrane-bounded organelle;GO:0043233//organelle lumen;GO:0044464//cell part;GO:0043231//intracellular membrane-bounded organelle;GO:0044446//intracellular organelle part;GO:0043229//intracellular organelle;GO:0044424//intracellular part;GO:0031974//membrane-enclosed lumen;GO:0005634//nucleus;GO:…	GO:0001883//purine nucleoside binding;GO:0032549//ribonucleoside binding;GO:0036094//small molecule binding;GO:0003824//catalytic activity;GO:0005488//binding;GO:0097159//organic cyclic compound binding;GO:0003723//RNA binding;GO:1901363//heterocyclic compound binding;GO:0003676//nucleic acid binding;GO:0097367//carbohydrate derivative binding;GO:0001882//nucleoside binding;GO:0032550//purine rib…	GO:1901360//organic cyclic compound metabolic process;GO:0034645//cellular macromolecule biosynthetic process;GO:0006139//nucleobase-containing compound metabolic process;GO:1901576//organic substance biosynthetic process;GO:0044237//cellular metabolic process;GO:0034654//nucleobase-containing compound biosynthetic process;GO:0034641//cellular nitrogen compound metabolic process;GO:0016070//RNA m…
XP_014336000	0	175.02	0.001	16.4933	14.0096	6.05e-05	0.0013036	up	FAM220A	PREDICTED: protein FAM220A isoform X1, partial [Bos taurus]	-	-	-	-	-	-	-
XP_005907081	0	579.52	0.001	16.46	14.0067	1.61e-15	6.08e-13	up	LOC102276690	PREDICTED: LOW QUALITY PROTEIN: transducin-like enhancer protein 4-like [Bos mutus]	-	-	-	-	GO:0043231//intracellular membrane-bounded organelle;GO:0005623//cell;GO:0043227//membrane-bounded organelle;GO:0005622//intracellular;GO:0044424//intracellular part;GO:0043226//organelle;GO:0043229//intracellular organelle;GO:0044464//cell part	GO:0003712//transcription cofactor activity;GO:0005488//binding;GO:0003700//transcription factor activity, sequence-specific DNA binding;GO:0005515//protein binding;GO:0044877//macromolecular complex binding;GO:0001071//nucleic acid binding transcription factor activity;GO:0000988//transcription factor activity, protein binding;GO:0000989//transcription factor activity, transcription factor bindi…	GO:0044260//cellular macromolecule metabolic process;GO:0050794//regulation of cellular process;GO:0044271//cellular nitrogen compound biosynthetic process;GO:0007154//cell communication;GO:0044237//cellular metabolic process;GO:0046483//heterocycle metabolic process;GO:1901360//organic cyclic compound metabolic process;GO:1901576//organic substance biosynthetic process;GO:0009987//cellular proce…
XP_005891843	0	215.967	0.001	16.4433	14.0052	2.39e-08	1.39e-06	up	ETFA	PREDICTED: electron transfer flavoprotein subunit alpha, mitochondrial isoform X1 [Bos mutus]	-	-	-	-	-	-	-
XP_005890745	0	281.717	0.001	16.4067	14.002	6.43e-11	7.82e-09	up	PPM1A	protein phosphatase 1A isoform 1 [Bos taurus]	Environmental Information Processing	Signal transduction	ko04010//MAPK signaling pathway	K04457	GO:0044424//intracellular part;GO:0044464//cell part;GO:0005737//cytoplasm;GO:0043229//intracellular organelle;GO:0043227//membrane-bounded organelle;GO:0005622//intracellular;GO:0043226//organelle;GO:0005623//cell;GO:0043231//intracellular membrane-bounded organelle;GO:0044444//cytoplasmic part	GO:0046872//metal ion binding;GO:0005488//binding;GO:0042578//phosphoric ester hydrolase activity;GO:0004723//calcium-dependent protein serine/threonine phosphatase activity;GO:0004722//protein serine/threonine phosphatase activity;GO:0016787//hydrolase activity;GO:0016788//hydrolase activity, acting on ester bonds;GO:0043169//cation binding;GO:0005515//protein binding;GO:0016791//phosphatase act…	GO:0007178//transmembrane receptor protein serine/threonine kinase signaling pathway;GO:0032879//regulation of localization;GO:0030509//BMP signaling pathway;GO:0007183//SMAD protein complex assembly;GO:0071495//cellular response to endogenous stimulus;GO:0071363//cellular response to growth factor stimulus;GO:0034622//cellular macromolecular complex assembly;GO:1903533//regulation of protein tar…
XP_005887461	0	38.12	0.001	16.3967	14.0011	0.0023564	0.0254731	up	TEX43	testis-expressed sequence 43 protein [Bos taurus]	-	-	-	-	-	-	-
XP_014336369	0	93.4833	0.001	16.33	13.9952	1.12e-06	4.11e-05	up	HAUS2	PREDICTED: HAUS augmin-like complex subunit 2 isoform X3 [Bos taurus]	-	-	-	-	GO:0044424//intracellular part;GO:0044444//cytoplasmic part;GO:0005819//spindle;GO:0044422//organelle part;GO:0005623//cell;GO:0031974//membrane-enclosed lumen;GO:0031981//nuclear lumen;GO:0005737//cytoplasm;GO:0005634//nucleus;GO:0032991//macromolecular complex;GO:0043232//intracellular non-membrane-bounded organelle;GO:0043229//intracellular organelle;GO:0044428//nuclear part;GO:0043234//protei…	-	GO:1902589//single-organism organelle organization;GO:0071822//protein complex subunit organization;GO:0009987//cellular process;GO:0044085//cellular component biogenesis;GO:0043933//macromolecular complex subunit organization;GO:0031023//microtubule organizing center organization;GO:0007017//microtubule-based process;GO:0016043//cellular component organization;GO:0044763//single-organism cellula…
XP_005898987	0	344.54	0.001	16.2633	13.9893	2.25e-12	4.09e-10	up	ARFGAP2	ADP-ribosylation factor GTPase-activating protein 2 [Bos taurus]	Cellular Processes	Transport and catabolism	ko04144//Endocytosis	K12493	GO:0016020//membrane;GO:0005622//intracellular;GO:0044424//intracellular part;GO:0043226//organelle;GO:0043227//membrane-bounded organelle;GO:0043231//intracellular membrane-bounded organelle;GO:0005623//cell;GO:0043229//intracellular organelle;GO:0044464//cell part	GO:0098772//molecular function regulator;GO:0043167//ion binding;GO:0030234//enzyme regulator activity;GO:0008047//enzyme activator activity;GO:0043169//cation binding;GO:0005488//binding	GO:0051336//regulation of hydrolase activity;GO:0065009//regulation of molecular function;GO:0050790//regulation of catalytic activity;GO:0051179//localization;GO:0006810//transport;GO:0043087//regulation of GTPase activity;GO:0065007//biological regulation;GO:0033036//macromolecule localization;GO:0051234//establishment of localization;GO:0008104//protein localization
XM_005886810	0	140.943	0.001	16.2267	13.9861	2.45e-06	8.22e-05	up	RNF151	PREDICTED: Bos mutus ring finger protein 151 (RNF151), mRNA	-	-	-	-	GO:0005622//intracellular;GO:0043229//intracellular organelle;GO:0043226//organelle;GO:0043231//intracellular membrane-bounded organelle;GO:0043227//membrane-bounded organelle;GO:0044424//intracellular part;GO:0044464//cell part;GO:0005623//cell	GO:0005488//binding;GO:0043167//ion binding;GO:0046872//metal ion binding;GO:0043169//cation binding;GO:0046914//transition metal ion binding	GO:0006464//cellular protein modification process;GO:0032446//protein modification by small protein conjugation;GO:0071704//organic substance metabolic process;GO:0044238//primary metabolic process;GO:0036211//protein modification process;GO:0019538//protein metabolic process;GO:0043170//macromolecule metabolic process;GO:0009987//cellular process;GO:0043412//macromolecule modification;GO:0044237…
XP_005908398	0	470.967	0.001	16.2267	13.9861	1.25e-12	2.38e-10	up	SOX30	PREDICTED: transcription factor SOX-30, partial [Bos mutus]	-	-	-	-	GO:0043229//intracellular organelle;GO:0043231//intracellular membrane-bounded organelle;GO:0005622//intracellular;GO:0044464//cell part;GO:0043226//organelle;GO:0043227//membrane-bounded organelle;GO:0044424//intracellular part;GO:0005623//cell	GO:1901363//heterocyclic compound binding;GO:0005488//binding;GO:0003676//nucleic acid binding;GO:0097159//organic cyclic compound binding;GO:0003677//DNA binding	GO:0014070//response to organic cyclic compound;GO:1901360//organic cyclic compound metabolic process;GO:0007276//gamete generation;GO:0034645//cellular macromolecule biosynthetic process;GO:0006351//transcription, DNA-templated;GO:0090304//nucleic acid metabolic process;GO:0044238//primary metabolic process;GO:0010467//gene expression;GO:0033993//response to lipid;GO:0000003//reproduction;GO:003…
XP_014336636	0	504.917	0.001	16.17	13.981	1.58e-13	3.76e-11	up	MTA2	PREDICTED: LOW QUALITY PROTEIN: metastasis-associated protein MTA2 [Bos mutus]	-	-	-	-	GO:0044424//intracellular part;GO:0000118//histone deacetylase complex;GO:1902494//catalytic complex;GO:0044451//nucleoplasm part;GO:0043229//intracellular organelle;GO:0070013//intracellular organelle lumen;GO:0005622//intracellular;GO:0000785//chromatin;GO:0044446//intracellular organelle part;GO:0043227//membrane-bounded organelle;GO:0043231//intracellular membrane-bounded organelle;GO:0005634…	GO:0003677//DNA binding;GO:0046914//transition metal ion binding;GO:0031490//chromatin DNA binding;GO:0008134//transcription factor binding;GO:0003690//double-stranded DNA binding;GO:0097159//organic cyclic compound binding;GO:0001085//RNA polymerase II transcription factor binding;GO:0000988//transcription factor activity, protein binding;GO:0005515//protein binding;GO:0016810//hydrolase activit…	GO:0009059//macromolecule biosynthetic process;GO:0016569//chromatin modification;GO:0016570//histone modification;GO:0071840//cellular component organization or biogenesis;GO:0044237//cellular metabolic process;GO:0009987//cellular process;GO:0006366//transcription from RNA polymerase II promoter;GO:0044271//cellular nitrogen compound biosynthetic process;GO:1901576//organic substance biosynthet…
XM_014481943	0	191.8	0.001	16.0567	13.9709	2.19e-07	9.87e-06	up	FANCD2OS	PREDICTED: Bos mutus FANCD2 opposite strand (FANCD2OS), transcript variant X2, mRNA	-	-	-	-	-	-	-
XM_014478169	0	144.333	0.001	16.0067	13.9664	1.54e-06	5.48e-05	up	TMEM247	PREDICTED: Bos mutus transmembrane protein 247 (TMEM247), mRNA	-	-	-	-	GO:0044425//membrane part;GO:0016020//membrane;GO:0031224//intrinsic component of membrane	-	-
Unigene043814	0	4	0.001	15.9767	13.9637	0.0450624	0.218234	no	-	-	-	-	-	-	-	-	-
XP_005899218	0	356.98	0.001	15.7467	13.9428	9.6e-05	0.00191316	up	SCARB2	PREDICTED: lysosome membrane protein 2 isoform X1 [Bos mutus]	Cellular Processes	Transport and catabolism	ko04142//Lysosome	K12384	GO:0070161//anchoring junction;GO:0043227//membrane-bounded organelle;GO:0043229//intracellular organelle;GO:0044421//extracellular region part;GO:0043230//extracellular organelle;GO:0030054//cell junction;GO:0000323//lytic vacuole;GO:1903561//extracellular vesicle;GO:0005773//vacuole;GO:0016020//membrane;GO:0044424//intracellular part;GO:0043226//organelle;GO:0005912//adherens junction;GO:003005…	GO:0005488//binding;GO:0005515//protein binding	GO:0046907//intracellular transport;GO:0007034//vacuolar transport;GO:0015031//protein transport;GO:0034613//cellular protein localization;GO:0006810//transport;GO:0051179//localization;GO:0006886//intracellular protein transport;GO:0070727//cellular macromolecule localization;GO:0033365//protein localization to organelle;GO:0008104//protein localization;GO:0045184//establishment of protein local…
XP_014335197	0	413.32	0.001	15.7367	13.9418	6.97e-14	1.78e-11	up	TOX4	TOX high mobility group box family member 4, partial [Bos mutus]	-	-	-	-	GO:0044422//organelle part;GO:0044464//cell part;GO:0005623//cell;GO:0043227//membrane-bounded organelle;GO:0008287//protein serine/threonine phosphatase complex;GO:0031974//membrane-enclosed lumen;GO:0043231//intracellular membrane-bounded organelle;GO:0044428//nuclear part;GO:0005634//nucleus;GO:0044424//intracellular part;GO:0070013//intracellular organelle lumen;GO:1903293//phosphatase comple…	GO:0097159//organic cyclic compound binding;GO:0005488//binding;GO:1901363//heterocyclic compound binding;GO:0003676//nucleic acid binding	-
XP_005899452	0	374.423	0.001	15.66	13.9348	3.8e-11	4.98e-09	up	ENO4	PREDICTED: enolase-like protein ENO4 [Bos mutus]	-	-	-	-	-	GO:0016829//lyase activity;GO:0003824//catalytic activity;GO:0016836//hydro-lyase activity;GO:0005488//binding;GO:0043167//ion binding;GO:0043169//cation binding;GO:0016835//carbon-oxygen lyase activity;GO:0046872//metal ion binding	GO:0019752//carboxylic acid metabolic process;GO:0043436//oxoacid metabolic process;GO:0044281//small molecule metabolic process;GO:0044699//single-organism process;GO:0044763//single-organism cellular process;GO:0032787//monocarboxylic acid metabolic process;GO:0044710//single-organism metabolic process;GO:0008152//metabolic process;GO:0006090//pyruvate metabolic process;GO:0071704//organic subs…
XP_005890417	0	269.723	0.001	15.5533	13.9249	8.79e-11	1.01e-08	up	CALCOCO2	calcium-binding and coiled-coil domain-containing protein 2 [Bos taurus]	-	-	-	-	GO:0043231//intracellular membrane-bounded organelle;GO:0044437//vacuolar part;GO:0044424//intracellular part;GO:0005773//vacuole;GO:0043226//organelle;GO:0005737//cytoplasm;GO:0044446//intracellular organelle part;GO:0098588//bounding membrane of organelle;GO:0044444//cytoplasmic part;GO:0044464//cell part;GO:0043232//intracellular non-membrane-bounded organelle;GO:0005623//cell;GO:0043229//intr…	GO:0005515//protein binding;GO:0005488//binding;GO:0046983//protein dimerization activity	GO:0042221//response to chemical;GO:0065007//biological regulation;GO:0010033//response to organic substance;GO:0010506//regulation of autophagy;GO:0050789//regulation of biological process;GO:0010508//positive regulation of autophagy;GO:0016241//regulation of macroautophagy;GO:0034097//response to cytokine;GO:0050794//regulation of cellular process;GO:0048522//positive regulation of cellular pro…
XM_014480146	0	209.333	0.001	15.4633	13.9166	6.91e-08	3.58e-06	up	LOC106701135	PREDICTED: Bos mutus tripartite motif-containing protein 54-like (LOC106701135), mRNA	-	-	-	-	-	GO:0005488//binding;GO:0046914//transition metal ion binding;GO:0043167//ion binding;GO:0043169//cation binding;GO:0046872//metal ion binding	-
XP_005892424	0	394.183	0.001	15.44	13.9144	7.62e-12	1.21e-09	up	CEP76	PREDICTED: centrosomal protein of 76 kDa [Bos mutus]	-	-	-	-	GO:0044430//cytoskeletal part;GO:0043232//intracellular non-membrane-bounded organelle;GO:0044422//organelle part;GO:0043229//intracellular organelle;GO:0044446//intracellular organelle part;GO:0005623//cell;GO:0044424//intracellular part;GO:0032991//macromolecular complex;GO:0044464//cell part;GO:0005856//cytoskeleton;GO:0043228//non-membrane-bounded organelle;GO:0015630//microtubule cytoskeleto…	-	GO:0007098//centrosome cycle;GO:0022402//cell cycle process;GO:0022607//cellular component assembly;GO:0070925//organelle assembly;GO:0098534//centriole assembly;GO:0016043//cellular component organization;GO:0007010//cytoskeleton organization;GO:0044699//single-organism process;GO:0044085//cellular component biogenesis;GO:0009987//cellular process;GO:0031023//microtubule organizing center organi…
XP_005888447	0	441.433	0.001	15.41	13.9116	1.08e-12	2.07e-10	up	LMNB2	PREDICTED: lamin-B2 [Bos mutus]	-	-	-	-	GO:0031090//organelle membrane;GO:0005856//cytoskeleton;GO:0012505//endomembrane system;GO:0044430//cytoskeletal part;GO:0019866//organelle inner membrane;GO:0099513//polymeric cytoskeletal fiber;GO:0016020//membrane;GO:0043229//intracellular organelle;GO:0099512//supramolecular fiber;GO:0044422//organelle part;GO:0031967//organelle envelope;GO:0044424//intracellular part;GO:0043231//intracellula…	-	-
NP_001278649	0	280.85	0.001	15.39	13.9097	6.62e-11	8.02e-09	up	AZIN1	antizyme inhibitor 1 [Bos taurus]	-	-	-	-	-	-	-
XP_014334795	0	280.85	0.001	15.39	13.9097	6.62e-11	8.02e-09	up	AZIN1	antizyme inhibitor 1 [Bos taurus]	-	-	-	-	-	-	-
XM_005909997	0	482	0.001	15.3333	13.9044	4.76e-11	6.01e-09	up	LOC102272931	PREDICTED: Bos mutus chromosome unknown open reading frame, human C10orf90 (LOC102272931), mRNA	-	-	-	-	-	-	-
XM_005890516	0	265.667	0.001	15.3267	13.9038	1.81e-08	1.09e-06	up	SUN3	PREDICTED: Bos mutus Sad1 and UNC84 domain containing 3 (SUN3), mRNA	-	-	-	-	GO:0043231//intracellular membrane-bounded organelle;GO:0005635//nuclear envelope;GO:0044446//intracellular organelle part;GO:0005622//intracellular;GO:0031967//organelle envelope;GO:0044422//organelle part;GO:0044428//nuclear part;GO:0031975//envelope;GO:0043227//membrane-bounded organelle;GO:0005634//nucleus;GO:0044425//membrane part;GO:0016020//membrane;GO:0043229//intracellular organelle;GO:0…	-	-
XP_005888249	0	792.517	0.001	15.3133	13.9025	6.93e-16	2.83e-13	up	SPAG5	PREDICTED: sperm-associated antigen 5 [Bos mutus]	-	-	-	-	-	-	-
XP_014338799	0	876.613	0.001	15.1933	13.8912	2.27e-16	1.07e-13	up	SCAP	PREDICTED: sterol regulatory element-binding protein cleavage-activating protein [Bos mutus]	-	-	-	-	GO:0043231//intracellular membrane-bounded organelle;GO:0030133//transport vesicle;GO:0030135//coated vesicle;GO:0043229//intracellular organelle;GO:0031982//vesicle;GO:0044444//cytoplasmic part;GO:0016020//membrane;GO:0016023//cytoplasmic, membrane-bounded vesicle;GO:0044425//membrane part;GO:0005622//intracellular;GO:0042175//nuclear outer membrane-endoplasmic reticulum membrane network;GO:0005…	GO:0097159//organic cyclic compound binding;GO:0032934//sterol binding;GO:0005515//protein binding;GO:0005488//binding;GO:0005496//steroid binding;GO:0008289//lipid binding	GO:1901698//response to nitrogen compound;GO:0006631//fatty acid metabolic process;GO:0009058//biosynthetic process;GO:0044238//primary metabolic process;GO:0044237//cellular metabolic process;GO:0016125//sterol metabolic process;GO:1901615//organic hydroxy compound metabolic process;GO:0023052//signaling;GO:0010243//response to organonitrogen compound;GO:0044763//single-organism cellular process…
Unigene006461	0	9.66667	0.001	15.07	13.8794	0.00883416	0.070151	no	Unigene006461	PREDICTED: tubulin polyglutamylase TTLL5 isoform X13 [Ovis aries]	-	-	-	-	GO:0005856//cytoskeleton;GO:0044430//cytoskeletal part;GO:0015630//microtubule cytoskeleton;GO:0044464//cell part;GO:0044424//intracellular part;GO:0043228//non-membrane-bounded organelle;GO:0043226//organelle;GO:0043229//intracellular organelle;GO:0005815//microtubule organizing center;GO:0005623//cell;GO:0044446//intracellular organelle part;GO:0044422//organelle part;GO:0005622//intracellular;…	-	GO:0019538//protein metabolic process;GO:0044267//cellular protein metabolic process;GO:0071704//organic substance metabolic process;GO:0044702//single organism reproductive process;GO:0000003//reproduction;GO:0003006//developmental process involved in reproduction;GO:0032501//multicellular organismal process;GO:0048232//male gamete generation;GO:0044238//primary metabolic process;GO:0044699//sin…
XP_005898204	0	315.587	0.001	15.05	13.8775	1.14e-11	1.74e-09	up	DYNC1LI1	PREDICTED: LOW QUALITY PROTEIN: cytoplasmic dynein 1 light intermediate chain 1 [Bos mutus]	Cellular Processes;Organismal Systems	Excretory system;Transport and catabolism	ko04145//Phagosome;ko04962//Vasopressin-regulated water reabsorption	K10416	GO:0043232//intracellular non-membrane-bounded organelle;GO:0031981//nuclear lumen;GO:0043226//organelle;GO:0043231//intracellular membrane-bounded organelle;GO:0044422//organelle part;GO:0005815//microtubule organizing center;GO:0031974//membrane-enclosed lumen;GO:0044430//cytoskeletal part;GO:0005634//nucleus;GO:0044464//cell part;GO:0032991//macromolecular complex;GO:0005856//cytoskeleton;GO:1…	GO:0005488//binding;GO:0016462//pyrophosphatase activity;GO:0016818//hydrolase activity, acting on acid anhydrides, in phosphorus-containing anhydrides;GO:0016817//hydrolase activity, acting on acid anhydrides;GO:0003824//catalytic activity;GO:1901363//heterocyclic compound binding;GO:0003774//motor activity;GO:0097159//organic cyclic compound binding;GO:0003723//RNA binding;GO:0016787//hydrolase…	GO:0010948//negative regulation of cell cycle process;GO:0000075//cell cycle checkpoint;GO:1901987//regulation of cell cycle phase transition;GO:2000816//negative regulation of mitotic sister chromatid separation;GO:0031577//spindle checkpoint;GO:0033044//regulation of chromosome organization;GO:1901988//negative regulation of cell cycle phase transition;GO:0045930//negative regulation of mitotic…
XP_005889926	0	131.373	0.001	15.0433	13.8768	1.66e-05	0.000429451	up	HMGB3	PREDICTED: high mobility group protein B3 [Bos mutus]	-	-	-	-	GO:0044424//intracellular part;GO:0043229//intracellular organelle;GO:0043227//membrane-bounded organelle;GO:0043231//intracellular membrane-bounded organelle;GO:0043232//intracellular non-membrane-bounded organelle;GO:0044464//cell part;GO:0005622//intracellular;GO:0043228//non-membrane-bounded organelle;GO:0005623//cell;GO:0043226//organelle	GO:0043566//structure-specific DNA binding;GO:0003677//DNA binding;GO:0000217//DNA secondary structure binding;GO:0005488//binding;GO:1901363//heterocyclic compound binding;GO:0097159//organic cyclic compound binding;GO:0003723//RNA binding;GO:0003676//nucleic acid binding	GO:0006351//transcription, DNA-templated;GO:0019438//aromatic compound biosynthetic process;GO:0044249//cellular biosynthetic process;GO:0006259//DNA metabolic process;GO:0044707//single-multicellular organism process;GO:0006725//cellular aromatic compound metabolic process;GO:0034645//cellular macromolecule biosynthetic process;GO:0006139//nucleobase-containing compound metabolic process;GO:0044…
XP_005890501	0	332.49	0.001	15.02	13.8746	3.34e-06	0.000106851	up	BTBD2	PREDICTED: BTB/POZ domain-containing protein 2 [Bos mutus]	-	-	-	-	GO:0043232//intracellular non-membrane-bounded organelle;GO:0005623//cell;GO:0030529//intracellular ribonucleoprotein complex;GO:0036464//cytoplasmic ribonucleoprotein granule;GO:0044424//intracellular part;GO:0043226//organelle;GO:0005737//cytoplasm;GO:0005622//intracellular;GO:0043229//intracellular organelle;GO:0044444//cytoplasmic part;GO:0032991//macromolecular complex;GO:0044464//cell part;…	GO:0005488//binding	-
XP_005897146	0	273.763	0.001	15.0167	13.8743	8.41e-10	7.61e-08	up	PI4K2B	PREDICTED: phosphatidylinositol 4-kinase type 2-beta [Bos mutus]	Environmental Information Processing;Metabolism	Signal transduction;Carbohydrate metabolism	ko04070//Phosphatidylinositol signaling system;ko00562//Inositol phosphate metabolism	K13711	-	-	GO:0008152//metabolic process;GO:0006796//phosphate-containing compound metabolic process;GO:0009987//cellular process;GO:0044237//cellular metabolic process;GO:0006793//phosphorus metabolic process
XM_005893909	0	491.263	0.001	14.9733	13.8701	1.38e-12	2.62e-10	up	RSPH6A	PREDICTED: Bos mutus radial spoke head 6 homolog A (Chlamydomonas) (RSPH6A), mRNA	-	-	-	-	-	-	-
XP_005887175	0	76.45	0.001	14.96	13.8688	3.88e-06	0.000121861	up	NRAS	PREDICTED: GTPase NRas [Bos mutus]	Cellular Processes;Organismal Systems;Environmental Information Processing	Nervous system;Signal transduction;Cellular commiunity;Development;Cell motility;Immune system;Endocrine system	ko04151//PI3K-Akt signaling pathway;ko04010//MAPK signaling pathway;ko04014//Ras signaling pathway;ko04810//Regulation of actin cytoskeleton;ko04015//Rap1 signaling pathway;ko04062//Chemokine signaling pathway;ko04921//Oxytocin signaling pathway;ko04360//Axon guidance;ko04550//Signaling pathways regulating pluripotency of stem cells;ko04910//Insulin signaling pathway;ko04530//Tight junction;ko040…	K07828	GO:0043227//membrane-bounded organelle;GO:0044444//cytoplasmic part;GO:0044464//cell part;GO:0005622//intracellular;GO:0005576//extracellular region;GO:0044431//Golgi apparatus part;GO:0044446//intracellular organelle part;GO:0005623//cell;GO:0016020//membrane;GO:0044424//intracellular part;GO:0012505//endomembrane system;GO:0005794//Golgi apparatus;GO:0043229//intracellular organelle;GO:0044422/…	GO:0097367//carbohydrate derivative binding;GO:0016787//hydrolase activity;GO:0005488//binding;GO:0032550//purine ribonucleoside binding;GO:0016817//hydrolase activity, acting on acid anhydrides;GO:0005515//protein binding;GO:0097159//organic cyclic compound binding;GO:0001883//purine nucleoside binding;GO:0001882//nucleoside binding;GO:1901363//heterocyclic compound binding;GO:0016818//hydrolase…	GO:0034613//cellular protein localization;GO:0048666//neuron development;GO:0044767//single-organism developmental process;GO:0044267//cellular protein metabolic process;GO:0061564//axon development;GO:0009607//response to biotic stimulus;GO:0002218//activation of innate immune response;GO:0048856//anatomical structure development;GO:0001819//positive regulation of cytokine production;GO:0060537/…
XM_005899897	0	151.98	0.001	14.8967	13.8627	6.1e-07	2.43e-05	up	TEPP	PREDICTED: Bos mutus testis, prostate and placenta expressed (TEPP), mRNA	-	-	-	-	-	-	-
XP_005905952	0	114.077	0.001	14.8967	13.8627	9.7e-07	3.62e-05	up	MMD	PREDICTED: monocyte to macrophage differentiation factor [Bos mutus]	-	-	-	-	GO:0005623//cell;GO:0044424//intracellular part;GO:0043231//intracellular membrane-bounded organelle;GO:0005622//intracellular;GO:0016020//membrane;GO:0043227//membrane-bounded organelle;GO:0044464//cell part;GO:0044425//membrane part;GO:0043226//organelle;GO:0043229//intracellular organelle;GO:0031224//intrinsic component of membrane	-	GO:0019220//regulation of phosphate metabolic process;GO:0044699//single-organism process;GO:0022008//neurogenesis;GO:0050789//regulation of biological process;GO:0030182//neuron differentiation;GO:0051179//localization;GO:0031323//regulation of cellular metabolic process;GO:0048856//anatomical structure development;GO:0042327//positive regulation of phosphorylation;GO:0031401//positive regulatio…
XP_005889610	0	243.697	0.001	14.8733	13.8604	2.55e-05	0.000624917	up	ZC3H15	zinc finger CCCH domain-containing protein 15 [Bos taurus]	-	-	-	-	GO:0044446//intracellular organelle part;GO:0044424//intracellular part;GO:0043229//intracellular organelle;GO:0044422//organelle part;GO:0044428//nuclear part;GO:0043227//membrane-bounded organelle;GO:0005622//intracellular;GO:0070013//intracellular organelle lumen;GO:0043233//organelle lumen;GO:0005623//cell;GO:0031974//membrane-enclosed lumen;GO:0043226//organelle;GO:0031981//nuclear lumen;GO:…	GO:0097159//organic cyclic compound binding;GO:1901363//heterocyclic compound binding;GO:0003676//nucleic acid binding;GO:0043167//ion binding;GO:0003723//RNA binding;GO:0043169//cation binding;GO:0005488//binding	GO:0050794//regulation of cellular process;GO:0007165//signal transduction;GO:0007154//cell communication;GO:0051716//cellular response to stimulus;GO:0065007//biological regulation;GO:0023052//signaling;GO:0044700//single organism signaling;GO:0044763//single-organism cellular process;GO:0007166//cell surface receptor signaling pathway;GO:0050896//response to stimulus;GO:0050789//regulation of b…
XP_005901860	0	332.137	0.001	14.8167	13.8549	2.82e-12	4.93e-10	up	ZMYND11	PREDICTED: zinc finger MYND domain-containing protein 11 isoform X3 [Bos mutus]	-	-	-	-	-	-	-
XP_005904877	0	491.537	0.001	14.8133	13.8546	7.19e-12	1.15e-09	up	HSPA4L	PREDICTED: LOW QUALITY PROTEIN: heat shock 70 kDa protein 4L [Bos mutus]	Genetic Information Processing	Folding, sorting and degradation	ko04141//Protein processing in endoplasmic reticulum	K09485	GO:0044424//intracellular part;GO:0005623//cell;GO:0044444//cytoplasmic part;GO:0044464//cell part;GO:0005622//intracellular;GO:0005737//cytoplasm	GO:0036094//small molecule binding;GO:0001882//nucleoside binding;GO:0001883//purine nucleoside binding;GO:0005488//binding;GO:0097159//organic cyclic compound binding;GO:0097367//carbohydrate derivative binding;GO:0032549//ribonucleoside binding;GO:0032550//purine ribonucleoside binding;GO:1901363//heterocyclic compound binding	-
XP_005899575	0	357.163	0.001	14.7233	13.8458	2.76e-12	4.84e-10	up	BIRC2	PREDICTED: baculoviral IAP repeat-containing protein 2 [Bos mutus]	Genetic Information Processing;Environmental Information Processing;Cellular Processes;Organismal Systems	Signal transduction;Cellular commiunity;Immune system;Cell growth and death;Folding, sorting and degradation	ko04510//Focal adhesion;ko04120//Ubiquitin mediated proteolysis;ko04668//TNF signaling pathway;ko04064//NF-kappa B signaling pathway;ko04210//Apoptosis;ko04621//NOD-like receptor signaling pathway	K16060	GO:0044425//membrane part;GO:0005887//integral component of plasma membrane;GO:0016020//membrane;GO:0044459//plasma membrane part;GO:0043227//membrane-bounded organelle;GO:0005886//plasma membrane;GO:0071944//cell periphery;GO:0031226//intrinsic component of plasma membrane;GO:0043231//intracellular membrane-bounded organelle;GO:0031224//intrinsic component of membrane;GO:0005623//cell;GO:0044464…	GO:0005488//binding;GO:0019787//ubiquitin-like protein transferase activity;GO:0003712//transcription cofactor activity;GO:0003824//catalytic activity;GO:0005515//protein binding;GO:0000989//transcription factor activity, transcription factor binding;GO:0000988//transcription factor activity, protein binding;GO:0043167//ion binding;GO:0046914//transition metal ion binding;GO:0046872//metal ion bi…	GO:0044237//cellular metabolic process;GO:0002253//activation of immune response;GO:0044260//cellular macromolecule metabolic process;GO:0006807//nitrogen compound metabolic process;GO:0009056//catabolic process;GO:0043254//regulation of protein complex assembly;GO:0008152//metabolic process;GO:0044267//cellular protein metabolic process;GO:0050778//positive regulation of immune response;GO:00301…
XP_005888638	0	103.73	0.001	14.6233	13.836	1.53e-06	5.48e-05	up	PLEKHB2	PREDICTED: pleckstrin homology domain-containing family B member 2 [Bos mutus]	-	-	-	-	-	-	-
XP_005910934	0	136.123	0.001	14.5967	13.8334	0.000259264	0.00437297	up	LOC102283463	major histocompatibility complex, class II, DR alpha precursor [Bos taurus]	Cellular Processes;Organismal Systems;Environmental Information Processing	Transport and catabolism;Signaling molecules and interaction;Immune system	ko04145//Phagosome;ko04514//Cell adhesion molecules (CAMs);ko04612//Antigen processing and presentation;ko04672//Intestinal immune network for IgA production	K06752	GO:0044425//membrane part;GO:0043231//intracellular membrane-bounded organelle;GO:0043227//membrane-bounded organelle;GO:0044459//plasma membrane part;GO:0043229//intracellular organelle;GO:1903561//extracellular vesicle;GO:0005770//late endosome;GO:0016020//membrane;GO:0032991//macromolecular complex;GO:0044421//extracellular region part;GO:0012505//endomembrane system;GO:0005773//vacuole;GO:000…	GO:0032403//protein complex binding;GO:0044877//macromolecular complex binding;GO:0005515//protein binding;GO:0005488//binding;GO:0023023//MHC protein complex binding;GO:0003823//antigen binding	GO:0044085//cellular component biogenesis;GO:0016043//cellular component organization;GO:0006461//protein complex assembly;GO:0065003//macromolecular complex assembly;GO:0002376//immune system process;GO:0043623//cellular protein complex assembly;GO:0050877//neurological system process;GO:0019882//antigen processing and presentation;GO:0032501//multicellular organismal process;GO:0022607//cellula…
XP_014338853	0	136.123	0.001	14.5967	13.8334	0.000259562	0.00437533	up	LOC102283463	major histocompatibility complex, class II, DR alpha precursor [Bos taurus]	Cellular Processes;Organismal Systems;Environmental Information Processing	Transport and catabolism;Signaling molecules and interaction;Immune system	ko04145//Phagosome;ko04514//Cell adhesion molecules (CAMs);ko04612//Antigen processing and presentation;ko04672//Intestinal immune network for IgA production	K06752	GO:0071944//cell periphery;GO:0043234//protein complex;GO:0016020//membrane;GO:0005622//intracellular;GO:0005576//extracellular region;GO:0000323//lytic vacuole;GO:0012505//endomembrane system;GO:0005886//plasma membrane;GO:0032991//macromolecular complex;GO:0044444//cytoplasmic part;GO:0005623//cell;GO:0098797//plasma membrane protein complex;GO:0005768//endosome;GO:0005737//cytoplasm;GO:0043231…	GO:0044877//macromolecular complex binding;GO:0032403//protein complex binding;GO:0003823//antigen binding;GO:0023023//MHC protein complex binding;GO:0005515//protein binding;GO:0005488//binding	GO:0071840//cellular component organization or biogenesis;GO:0009987//cellular process;GO:0034622//cellular macromolecular complex assembly;GO:0032501//multicellular organismal process;GO:0065003//macromolecular complex assembly;GO:0022607//cellular component assembly;GO:0016043//cellular component organization;GO:0071822//protein complex subunit organization;GO:0002396//MHC protein complex assem…
XP_005890481	0	542.823	0.001	14.5933	13.833	2.07e-06	7.1e-05	up	HSPA4	PREDICTED: heat shock 70 kDa protein 4 isoform X1 [Bos mutus]	Organismal Systems	Immune system	ko04612//Antigen processing and presentation	K09489	GO:0043230//extracellular organelle;GO:0044421//extracellular region part;GO:0005737//cytoplasm;GO:0005576//extracellular region;GO:0044464//cell part;GO:0044424//intracellular part;GO:0043226//organelle;GO:0031982//vesicle;GO:0043227//membrane-bounded organelle;GO:0044444//cytoplasmic part;GO:0005622//intracellular;GO:1903561//extracellular vesicle;GO:0005623//cell	GO:0097367//carbohydrate derivative binding;GO:0001883//purine nucleoside binding;GO:1901363//heterocyclic compound binding;GO:0001882//nucleoside binding;GO:0032549//ribonucleoside binding;GO:0005488//binding;GO:0032550//purine ribonucleoside binding;GO:0097159//organic cyclic compound binding;GO:0036094//small molecule binding	GO:0065003//macromolecular complex assembly;GO:0006605//protein targeting;GO:0009987//cellular process;GO:0006461//protein complex assembly;GO:0046907//intracellular transport;GO:0051179//localization;GO:0051641//cellular localization;GO:0043933//macromolecular complex subunit organization;GO:0006886//intracellular protein transport;GO:0071822//protein complex subunit organization;GO:0071840//cel…
XP_005893012	0	176.04	0.001	14.5367	13.8274	7.75e-09	5.36e-07	up	MTFR1	PREDICTED: mitochondrial fission regulator 1 [Bos mutus]	-	-	-	-	-	-	-
XP_005903442	0	361.523	0.001	14.45	13.8188	3.46e-12	5.96e-10	up	SENP2	PREDICTED: sentrin-specific protease 2 [Bos mutus]	Environmental Information Processing;Genetic Information Processing	Signal transduction;Translation	ko03013//RNA transport;ko04310//Wnt signaling pathway	K03345	GO:0012505//endomembrane system;GO:0005623//cell;GO:0044422//organelle part;GO:0016604//nuclear body;GO:0031967//organelle envelope;GO:0005634//nucleus;GO:0043227//membrane-bounded organelle;GO:0043231//intracellular membrane-bounded organelle;GO:0070013//intracellular organelle lumen;GO:0044428//nuclear part;GO:0005622//intracellular;GO:0044424//intracellular part;GO:0031974//membrane-enclosed l…	GO:0008233//peptidase activity;GO:0070011//peptidase activity, acting on L-amino acid peptides;GO:0019783//ubiquitin-like protein-specific protease activity;GO:0016787//hydrolase activity;GO:0003824//catalytic activity;GO:0008234//cysteine-type peptidase activity	GO:0044772//mitotic cell cycle phase transition;GO:0030154//cell differentiation;GO:0051726//regulation of cell cycle;GO:0000003//reproduction;GO:0043412//macromolecule modification;GO:0044843//cell cycle G1/S phase transition;GO:0018130//heterocycle biosynthetic process;GO:0035561//regulation of chromatin binding;GO:0016070//RNA metabolic process;GO:0018193//peptidyl-amino acid modification;GO:0…
XP_005898944	0	572.937	0.001	14.4233	13.8161	2.52e-16	1.17e-13	up	MIB1	PREDICTED: E3 ubiquitin-protein ligase MIB1 isoform X1 [Ovis aries]	-	-	-	-	-	-	-
XM_014481781	0	382.667	0.001	14.4167	13.8155	3.38e-10	3.39e-08	up	PP2D1	PREDICTED: Bos mutus protein phosphatase 2C-like domain containing 1 (PP2D1), mRNA	-	-	-	-	-	-	GO:0071704//organic substance metabolic process;GO:0008152//metabolic process;GO:0044260//cellular macromolecule metabolic process;GO:0043412//macromolecule modification;GO:0044237//cellular metabolic process;GO:0044238//primary metabolic process;GO:0036211//protein modification process;GO:0043170//macromolecule metabolic process;GO:0044267//cellular protein metabolic process;GO:0019538//protein …
XP_005905846	0	231.12	0.001	14.3433	13.8081	1.64e-09	1.35e-07	up	MPI	PREDICTED: mannose-6-phosphate isomerase [Bos mutus]	Metabolism	Carbohydrate metabolism	ko00520//Amino sugar and nucleotide sugar metabolism;ko00051//Fructose and mannose metabolism	K01809	GO:0005576//extracellular region;GO:0043227//membrane-bounded organelle;GO:0005623//cell;GO:1903561//extracellular vesicle;GO:0043226//organelle;GO:0044424//intracellular part;GO:0005622//intracellular;GO:0031982//vesicle;GO:0044464//cell part;GO:0044421//extracellular region part;GO:0043230//extracellular organelle	GO:0046914//transition metal ion binding;GO:0005488//binding;GO:0043169//cation binding;GO:0046872//metal ion binding;GO:0043167//ion binding;GO:0003824//catalytic activity	GO:0006002//fructose 6-phosphate metabolic process;GO:0034654//nucleobase-containing compound biosynthetic process;GO:1901135//carbohydrate derivative metabolic process;GO:1901576//organic substance biosynthetic process;GO:0009987//cellular process;GO:0009058//biosynthetic process;GO:0044271//cellular nitrogen compound biosynthetic process;GO:0019438//aromatic compound biosynthetic process;GO:004…
XM_005903645	0	295.333	0.001	14.3033	13.8041	4.05e-09	2.98e-07	up	LOC102270217	PREDICTED: Bos mutus chromosome unknown open reading frame, human C6orf118 (LOC102270217), mRNA	-	-	-	-	-	-	-
XM_014476551	0	554.67	0.001	14.2733	13.801	2.42e-15	8.82e-13	up	HSPA4	PREDICTED: Bos mutus heat shock 70kDa protein 4 (HSPA4), transcript variant X2, mRNA	Organismal Systems	Immune system	ko04612//Antigen processing and presentation	K09489	GO:0044421//extracellular region part;GO:0044444//cytoplasmic part;GO:0005576//extracellular region;GO:0043227//membrane-bounded organelle;GO:1903561//extracellular vesicle;GO:0005623//cell;GO:0044424//intracellular part;GO:0031982//vesicle;GO:0043226//organelle;GO:0044464//cell part;GO:0005622//intracellular;GO:0005737//cytoplasm;GO:0043230//extracellular organelle	GO:1901363//heterocyclic compound binding;GO:0005488//binding;GO:0001882//nucleoside binding;GO:0036094//small molecule binding;GO:0032549//ribonucleoside binding;GO:0032550//purine ribonucleoside binding;GO:0097367//carbohydrate derivative binding;GO:0097159//organic cyclic compound binding;GO:0001883//purine nucleoside binding	GO:0071822//protein complex subunit organization;GO:0009987//cellular process;GO:0033365//protein localization to organelle;GO:0006461//protein complex assembly;GO:0008104//protein localization;GO:0006839//mitochondrial transport;GO:0051179//localization;GO:0034622//cellular macromolecular complex assembly;GO:0043623//cellular protein complex assembly;GO:0006810//transport;GO:0070585//protein loc…
XP_005905395	0	442.34	0.001	14.2733	13.801	8.35e-14	2.1e-11	up	TLK2	PREDICTED: LOW QUALITY PROTEIN: serine/threonine-protein kinase tousled-like 2 [Bos mutus]	-	-	-	-	GO:0044464//cell part;GO:0044424//intracellular part;GO:0043229//intracellular organelle;GO:0043226//organelle;GO:0043228//non-membrane-bounded organelle;GO:0043227//membrane-bounded organelle;GO:0044444//cytoplasmic part;GO:0045111//intermediate filament cytoskeleton;GO:0005622//intracellular;GO:0005623//cell;GO:0043232//intracellular non-membrane-bounded organelle;GO:0005737//cytoplasm;GO:00058…	GO:0016773//phosphotransferase activity, alcohol group as acceptor;GO:0036094//small molecule binding;GO:0032550//purine ribonucleoside binding;GO:0016772//transferase activity, transferring phosphorus-containing groups;GO:0001883//purine nucleoside binding;GO:0016740//transferase activity;GO:0001882//nucleoside binding;GO:0003824//catalytic activity;GO:0016301//kinase activity;GO:0032549//ribonu…	GO:0043170//macromolecule metabolic process;GO:0051716//cellular response to stimulus;GO:0019538//protein metabolic process;GO:0030162//regulation of proteolysis;GO:0051246//regulation of protein metabolic process;GO:0033554//cellular response to stress;GO:0006325//chromatin organization;GO:1903362//regulation of cellular protein catabolic process;GO:0009628//response to abiotic stimulus;GO:00102…
XP_005891359	0	102.58	0.001	14.2333	13.797	2.2e-06	7.51e-05	up	LOC102282708	PREDICTED: glutathione S-transferase Mu 1-like isoform X1 [Bos mutus]	Metabolism	Metabolism of other amino acids;Xenobiotics biodegradation and metabolism	ko00980//Metabolism of xenobiotics by cytochrome P450;ko00982//Drug metabolism - cytochrome P450;ko00480//Glutathione metabolism	K00799	GO:0044424//intracellular part;GO:0005622//intracellular;GO:0005623//cell;GO:0044464//cell part	GO:0003824//catalytic activity	-
XP_005900554	0	397.837	0.001	14.1933	13.7929	1.95e-13	4.61e-11	up	KIF2A	PREDICTED: kinesin-like protein KIF2A isoform X3 [Bos mutus]	-	-	-	-	GO:0097223//sperm part;GO:0031981//nuclear lumen;GO:0005815//microtubule organizing center;GO:0005634//nucleus;GO:0042995//cell projection;GO:0070013//intracellular organelle lumen;GO:0044464//cell part;GO:0031514//motile cilium;GO:0043226//organelle;GO:0015630//microtubule cytoskeleton;GO:0043231//intracellular membrane-bounded organelle;GO:0044446//intracellular organelle part;GO:0044430//cytos…	GO:0016787//hydrolase activity;GO:0032550//purine ribonucleoside binding;GO:0032549//ribonucleoside binding;GO:0015631//tubulin binding;GO:0003824//catalytic activity;GO:0016818//hydrolase activity, acting on acid anhydrides, in phosphorus-containing anhydrides;GO:0001882//nucleoside binding;GO:0097367//carbohydrate derivative binding;GO:0017111//nucleoside-triphosphatase activity;GO:0008092//cyt…	GO:0007049//cell cycle;GO:0000278//mitotic cell cycle;GO:0009987//cellular process;GO:0044763//single-organism cellular process;GO:0007017//microtubule-based process;GO:0044699//single-organism process
XP_005890549	0	273.43	0.001	14.19	13.7926	3.97e-10	3.91e-08	up	UAP1	PREDICTED: UDP-N-acetylhexosamine pyrophosphorylase isoform X2 [Bos taurus]	Metabolism	Carbohydrate metabolism	ko00520//Amino sugar and nucleotide sugar metabolism	K00972	-	-	-
XP_005898238	0	89.55	0.001	14.1867	13.7922	0.000321606	0.00521779	up	LOC102272294	PREDICTED: protein EURL homolog isoform X3 [Bos mutus]	-	-	-	-	-	-	-
XP_014334588	0	211.743	0.001	14.1067	13.7841	7.57e-09	5.24e-07	up	ISG20L2	PREDICTED: interferon-stimulated 20 kDa exonuclease-like 2 [Bison bison bison]	-	-	-	-	GO:0031981//nuclear lumen;GO:0044424//intracellular part;GO:0043226//organelle;GO:0005623//cell;GO:0005622//intracellular;GO:0043233//organelle lumen;GO:0044428//nuclear part;GO:0043227//membrane-bounded organelle;GO:0043231//intracellular membrane-bounded organelle;GO:0043229//intracellular organelle;GO:0031974//membrane-enclosed lumen;GO:0044422//organelle part;GO:0044446//intracellular organel…	GO:0005488//binding;GO:0097159//organic cyclic compound binding;GO:1901363//heterocyclic compound binding;GO:0003824//catalytic activity;GO:0016788//hydrolase activity, acting on ester bonds;GO:0016787//hydrolase activity;GO:0003676//nucleic acid binding;GO:0003723//RNA binding	GO:0090304//nucleic acid metabolic process;GO:0044238//primary metabolic process;GO:0071704//organic substance metabolic process;GO:0006139//nucleobase-containing compound metabolic process;GO:0046483//heterocycle metabolic process;GO:0071840//cellular component organization or biogenesis;GO:0008152//metabolic process;GO:0043170//macromolecule metabolic process;GO:0044237//cellular metabolic proc…
XM_005906642	0	362.113	0.001	14.0967	13.7831	1.21e-09	1.05e-07	up	LOC102268578	PREDICTED: Bos mutus disintegrin and metalloproteinase domain-containing protein 20 (LOC102268578), partial mRNA	-	-	-	-	GO:0044425//membrane part;GO:0031224//intrinsic component of membrane;GO:0016020//membrane	GO:0043167//ion binding;GO:0046914//transition metal ion binding;GO:0005488//binding;GO:0070011//peptidase activity, acting on L-amino acid peptides;GO:0003824//catalytic activity;GO:0008233//peptidase activity;GO:0043169//cation binding;GO:0046872//metal ion binding;GO:0016787//hydrolase activity	GO:0071704//organic substance metabolic process;GO:0043170//macromolecule metabolic process;GO:0019538//protein metabolic process;GO:0044238//primary metabolic process;GO:0008152//metabolic process
XP_014336802	0	362.543	0.001	14.0867	13.782	1.21e-12	2.32e-10	up	NPLOC4	nuclear protein localization protein 4 homolog [Bos taurus]	Genetic Information Processing	Folding, sorting and degradation	ko04141//Protein processing in endoplasmic reticulum	K14015	-	-	-
XP_005893359	0	367.43	0.001	14.0367	13.7769	3.17e-12	5.5e-10	up	PIAS1	PREDICTED: E3 SUMO-protein ligase PIAS1 [Bos mutus]	Genetic Information Processing;Environmental Information Processing	Folding, sorting and degradation;Signal transduction	ko04120//Ubiquitin mediated proteolysis;ko04630//Jak-STAT signaling pathway	K04706	GO:0044428//nuclear part;GO:0005622//intracellular;GO:0031981//nuclear lumen;GO:0070013//intracellular organelle lumen;GO:0005654//nucleoplasm;GO:0031974//membrane-enclosed lumen;GO:0043227//membrane-bounded organelle;GO:0005634//nucleus;GO:0044464//cell part;GO:0043229//intracellular organelle;GO:0044451//nucleoplasm part;GO:0043233//organelle lumen;GO:0043231//intracellular membrane-bounded org…	GO:0019789//SUMO transferase activity;GO:0019787//ubiquitin-like protein transferase activity;GO:0035258//steroid hormone receptor binding;GO:0005515//protein binding;GO:0003712//transcription cofactor activity;GO:0046914//transition metal ion binding;GO:0051427//hormone receptor binding;GO:0019899//enzyme binding;GO:0043167//ion binding;GO:0005488//binding;GO:0005102//receptor binding;GO:1901363…	GO:0001959//regulation of cytokine-mediated signaling pathway;GO:0044767//single-organism developmental process;GO:0071495//cellular response to endogenous stimulus;GO:0032502//developmental process;GO:0009725//response to hormone;GO:0090304//nucleic acid metabolic process;GO:0008283//cell proliferation;GO:0016925//protein sumoylation;GO:0006807//nitrogen compound metabolic process;GO:0010033//re…
XP_005889791	0	354.897	0.001	14.0267	13.7759	1.31e-09	1.11e-07	up	FAM161A	PREDICTED: protein FAM161A isoform X2 [Bos mutus]	-	-	-	-	GO:0043226//organelle;GO:0043228//non-membrane-bounded organelle;GO:0044430//cytoskeletal part;GO:0044422//organelle part;GO:0031513//nonmotile primary cilium;GO:0043232//intracellular non-membrane-bounded organelle;GO:0072372//primary cilium;GO:0044446//intracellular organelle part;GO:0005856//cytoskeleton;GO:0042995//cell projection;GO:0043229//intracellular organelle;GO:0005815//microtubule or…	-	GO:0048856//anatomical structure development;GO:0009653//anatomical structure morphogenesis;GO:0032502//developmental process;GO:0048869//cellular developmental process;GO:0044767//single-organism developmental process;GO:0010927//cellular component assembly involved in morphogenesis;GO:0032989//cellular component morphogenesis;GO:0044085//cellular component biogenesis;GO:0009987//cellular proces…
XP_005911587	0	121.817	0.001	13.94	13.7669	3.2e-07	1.37e-05	up	LOC102264564	chromosome 1 open reading frame 43 homologg [Sus scrofa]	-	-	-	-	GO:0031224//intrinsic component of membrane;GO:0044425//membrane part;GO:0016020//membrane	GO:0003824//catalytic activity	GO:0044699//single-organism process;GO:0044710//single-organism metabolic process;GO:0008152//metabolic process
XP_014339143	0	121.817	0.001	13.94	13.7669	3.2e-07	1.37e-05	up	LOC102264564	chromosome 1 open reading frame 43 homologg [Sus scrofa]	-	-	-	-	GO:0044425//membrane part;GO:0031224//intrinsic component of membrane;GO:0016020//membrane	GO:0003824//catalytic activity	GO:0008152//metabolic process;GO:0044699//single-organism process;GO:0044710//single-organism metabolic process
XP_005909025	0	349.327	0.001	13.9133	13.7642	5.2e-12	8.59e-10	up	TRAFD1	PREDICTED: TRAF-type zinc finger domain-containing protein 1 isoform X2 [Bos mutus]	-	-	-	-	-	GO:0043169//cation binding;GO:0005488//binding;GO:0043167//ion binding	GO:0080134//regulation of response to stress;GO:0031348//negative regulation of defense response;GO:0048583//regulation of response to stimulus;GO:0031347//regulation of defense response;GO:0065007//biological regulation;GO:0050789//regulation of biological process;GO:0048519//negative regulation of biological process;GO:0048585//negative regulation of response to stimulus
XP_005902228	0.0133333	264.083	0.001	13.8833	13.7611	1.54e-10	1.67e-08	up	KATNAL1	katanin p60 ATPase-containing subunit A-like 1 [Bos taurus]	-	-	-	-	-	-	-
XP_005904473	0	267.54	0.001	13.8733	13.76	8.67e-11	1e-08	up	KPNA4	PREDICTED: importin subunit alpha-3 [Chinchilla lanigera]	-	-	-	-	-	-	-
XP_014334996	0	107.42	0.001	13.8133	13.7538	4.18e-07	1.74e-05	up	NUS1	PREDICTED: nogo-B receptor [Bos mutus]	Metabolism	Metabolism of terpenoids and polyketides	ko00900//Terpenoid backbone biosynthesis	K19177	GO:0042175//nuclear outer membrane-endoplasmic reticulum membrane network;GO:0044464//cell part;GO:0005623//cell;GO:0016020//membrane;GO:0012505//endomembrane system	GO:0016740//transferase activity;GO:0003824//catalytic activity	GO:0071704//organic substance metabolic process;GO:0006720//isoprenoid metabolic process;GO:1902578//single-organism localization;GO:0055088//lipid homeostasis;GO:0044238//primary metabolic process;GO:0044711//single-organism biosynthetic process;GO:0009058//biosynthetic process;GO:0030301//cholesterol transport;GO:0065008//regulation of biological quality;GO:0044723//single-organism carbohydrate…
XM_005893359	0	159.357	0.001	13.8033	13.7527	3.46e-07	1.46e-05	up	LOC102278984	PREDICTED: Bos mutus chromosome unknown open reading frame, human C21orf140 (LOC102278984), mRNA	-	-	-	-	-	-	-
XP_005901710	0	1219.15	0.001	13.7667	13.7489	1.99e-22	5.53e-19	up	ARHGAP21	PREDICTED: LOW QUALITY PROTEIN: rho GTPase-activating protein 21 [Bos mutus]	-	-	-	-	-	-	-
XP_005911944	0	80.3	0.001	13.7167	13.7436	0.000424463	0.00656822	up	SRSF2	PREDICTED: LOW QUALITY PROTEIN: serine/arginine-rich splicing factor 2 [Bos mutus]	Genetic Information Processing	Transcription	ko03040//Spliceosome	K12891	GO:0044446//intracellular organelle part;GO:0005622//intracellular;GO:0032991//macromolecular complex;GO:0044464//cell part;GO:0044428//nuclear part;GO:0043226//organelle;GO:0016604//nuclear body;GO:0043230//extracellular organelle;GO:0043229//intracellular organelle;GO:0043227//membrane-bounded organelle;GO:0031982//vesicle;GO:0044424//intracellular part;GO:1903561//extracellular vesicle;GO:0044…	GO:0005488//binding;GO:1901363//heterocyclic compound binding;GO:0003723//RNA binding;GO:0019900//kinase binding;GO:0019899//enzyme binding;GO:0019901//protein kinase binding;GO:0097159//organic cyclic compound binding;GO:0003676//nucleic acid binding;GO:0005515//protein binding	GO:0008152//metabolic process;GO:0016071//mRNA metabolic process;GO:0009987//cellular process;GO:0000380//alternative mRNA splicing, via spliceosome;GO:0000377//RNA splicing, via transesterification reactions with bulged adenosine as nucleophile;GO:0046483//heterocycle metabolic process;GO:0000398//mRNA splicing, via spliceosome;GO:0044237//cellular metabolic process;GO:0044260//cellular macromol…
XP_005909281	0	62.1867	0.001	13.71	13.7429	6.36e-05	0.00136074	up	SDHC	PREDICTED: succinate dehydrogenase cytochrome b560 subunit, mitochondrial isoform X1 [Bos mutus]	Metabolism	Energy metabolism;Carbohydrate metabolism;Global and Overview	ko00190//Oxidative phosphorylation;ko01200//Carbon metabolism;ko00020//Citrate cycle (TCA cycle)	K00236	-	-	-
XP_014333927	0.0133333	391.11	0.001	13.6767	13.7394	8.14e-13	1.62e-10	up	NEK4	Serine/threonine-protein kinase Nek4 [Bos mutus]	-	-	-	-	-	-	-
XP_005899785	0	671.63	0.001	13.67	13.7387	2.86e-15	1.03e-12	up	ZNF451	PREDICTED: zinc finger protein 451 [Bos mutus]	-	-	-	-	-	GO:0005488//binding;GO:0043169//cation binding;GO:0043167//ion binding	GO:0006139//nucleobase-containing compound metabolic process;GO:0006725//cellular aromatic compound metabolic process;GO:0034645//cellular macromolecule biosynthetic process;GO:0032774//RNA biosynthetic process;GO:0006351//transcription, DNA-templated;GO:0044271//cellular nitrogen compound biosynthetic process;GO:1901576//organic substance biosynthetic process;GO:0044249//cellular biosynthetic pr…
XM_014478022	0	85.8933	0.001	13.6267	13.7341	1.53e-05	0.000401854	up	FAM24A	PREDICTED: Bos mutus family with sequence similarity 24, member A (FAM24A), transcript variant X1, mRNA	-	-	-	-	-	-	-
XP_005908542	0	393.39	0.001	13.61	13.7324	4.25e-13	9.11e-11	up	GLE1	PREDICTED: nucleoporin GLE1 [Bos mutus]	-	-	-	-	-	-	-
XP_005891730	0	53.7867	0.001	13.59	13.7303	0.000118338	0.00228341	up	LOC102276251	PREDICTED: UPF0561 protein C2orf68 homolog isoform X1 [Bos taurus]	-	-	-	-	-	-	-
XM_005909370	0	95.88	0.001	13.58	13.7292	1.22e-05	0.000332173	up	LOC102278960	PREDICTED: Bos mutus chromosome unknown open reading frame, human C3orf84 (LOC102278960), mRNA	-	-	-	-	-	-	-
XP_005894368	0	338.663	0.001	13.5267	13.7235	1.7e-08	1.03e-06	up	LOC102285616	PREDICTED: craniofacial development protein 2-like [Bos mutus]	-	-	-	-	GO:0044464//cell part;GO:0044424//intracellular part;GO:0043226//organelle;GO:0043231//intracellular membrane-bounded organelle;GO:0005623//cell;GO:0043227//membrane-bounded organelle;GO:0043229//intracellular organelle;GO:0005622//intracellular	-	-
XM_005904245	0	1022.67	0.001	13.5033	13.721	1.28e-14	3.94e-12	up	ALS2CR11	PREDICTED: Bos mutus amyotrophic lateral sclerosis 2 (juvenile) chromosome region, candidate 11 (ALS2CR11), mRNA	-	-	-	-	-	-	-
XP_005911062	0	155.257	0.001	13.4833	13.7189	6.21e-06	0.000184477	up	TRIM69	PREDICTED: E3 ubiquitin-protein ligase TRIM69 isoform X2 [Bos mutus]	-	-	-	-	GO:0016604//nuclear body;GO:0043226//organelle;GO:0044428//nuclear part;GO:0043231//intracellular membrane-bounded organelle;GO:0005654//nucleoplasm;GO:0070013//intracellular organelle lumen;GO:0044446//intracellular organelle part;GO:0031974//membrane-enclosed lumen;GO:0016020//membrane;GO:0044424//intracellular part;GO:0044451//nucleoplasm part;GO:0044464//cell part;GO:0005623//cell;GO:0043233/…	GO:0046872//metal ion binding;GO:0043167//ion binding;GO:0043169//cation binding;GO:0005488//binding;GO:0046914//transition metal ion binding	GO:0006464//cellular protein modification process;GO:0036211//protein modification process;GO:0009987//cellular process;GO:0071704//organic substance metabolic process;GO:0044238//primary metabolic process;GO:0043412//macromolecule modification;GO:0043170//macromolecule metabolic process;GO:0070647//protein modification by small protein conjugation or removal;GO:0044237//cellular metabolic proces…
XP_005903966	0	206.107	0.001	13.48	13.7185	1.88e-09	1.53e-07	up	CRELD2	PREDICTED: cysteine-rich with EGF-like domain protein 2 [Bison bison bison]	-	-	-	-	GO:0005623//cell;GO:0043226//organelle;GO:0043229//intracellular organelle;GO:0044424//intracellular part;GO:0043227//membrane-bounded organelle;GO:0044464//cell part;GO:0044421//extracellular region part;GO:0005622//intracellular;GO:0043231//intracellular membrane-bounded organelle;GO:0005576//extracellular region	-	-
XM_005910897	0	144.297	0.001	13.4233	13.7125	1.96e-06	6.76e-05	up	TEX37	PREDICTED: Bos mutus testis expressed 37 (TEX37), transcript variant X1, mRNA	-	-	-	-	-	-	-
XP_005888809	0	334.333	0.001	13.4133	13.7114	4.29e-12	7.17e-10	up	NUP58	PREDICTED: LOW QUALITY PROTEIN: nucleoporin p58/p45 [Bos mutus]	Genetic Information Processing	Translation	ko03013//RNA transport	K14307	-	-	GO:0051169//nuclear transport;GO:0006810//transport;GO:0046907//intracellular transport;GO:0051179//localization;GO:0051641//cellular localization;GO:0051649//establishment of localization in cell;GO:0051234//establishment of localization
XP_014335742	0	38.4567	0.001	13.41	13.711	0.00256977	0.0273677	up	POMP	PREDICTED: proteasome maturation protein [Myotis brandtii]	Genetic Information Processing	Folding, sorting and degradation	ko03050//Proteasome	K11599	-	-	-
XP_005893101	0	171.36	0.001	13.4033	13.7103	1.02e-08	6.7e-07	up	CXCR4	C-X-C chemokine receptor type 4 [Bos taurus]	Cellular Processes;Organismal Systems;Environmental Information Processing	Immune system;Signaling molecules and interaction;Transport and catabolism;Development	ko04144//Endocytosis;ko04060//Cytokine-cytokine receptor interaction;ko04062//Chemokine signaling pathway;ko04360//Axon guidance;ko04670//Leukocyte transendothelial migration;ko04672//Intestinal immune network for IgA production	K04189	GO:0044425//membrane part;GO:0031224//intrinsic component of membrane;GO:0044444//cytoplasmic part;GO:0005773//vacuole;GO:0043231//intracellular membrane-bounded organelle;GO:0044464//cell part;GO:0005768//endosome;GO:0012505//endomembrane system;GO:0043227//membrane-bounded organelle;GO:0031982//vesicle;GO:0005737//cytoplasm;GO:0005623//cell;GO:1903561//extracellular vesicle;GO:0044424//intracel…	GO:0004888//transmembrane signaling receptor activity;GO:0004871//signal transducer activity;GO:0008092//cytoskeletal protein binding;GO:0001637//G-protein coupled chemoattractant receptor activity;GO:0008528//G-protein coupled peptide receptor activity;GO:0004950//chemokine receptor activity;GO:0019899//enzyme binding;GO:0005515//protein binding;GO:0004872//receptor activity;GO:0004930//G-protei…	GO:0050794//regulation of cellular process;GO:0048870//cell motility;GO:0070887//cellular response to chemical stimulus;GO:0035556//intracellular signal transduction;GO:0007165//signal transduction;GO:0050789//regulation of biological process;GO:0050896//response to stimulus;GO:0071345//cellular response to cytokine stimulus;GO:0009605//response to external stimulus;GO:0016477//cell migration;GO:…
XP_014336640	0	398.16	0.001	13.4033	13.7103	8.33e-06	0.00023821	up	HNRNPUL2	PREDICTED: heterogeneous nuclear ribonucleoprotein U-like protein 2 [Bos mutus]	-	-	-	-	-	-	-
XP_005898382	0	361.037	0.001	13.3933	13.7092	5.82e-06	0.000174856	up	ELL	PREDICTED: RNA polymerase II elongation factor ELL [Bos mutus]	-	-	-	-	GO:0043231//intracellular membrane-bounded organelle;GO:0043229//intracellular organelle;GO:0043232//intracellular non-membrane-bounded organelle;GO:0043228//non-membrane-bounded organelle;GO:0031981//nuclear lumen;GO:0005694//chromosome;GO:0005856//cytoskeleton;GO:0044451//nucleoplasm part;GO:0044427//chromosomal part;GO:0005634//nucleus;GO:0044422//organelle part;GO:0043227//membrane-bounded or…	GO:0019899//enzyme binding;GO:0005515//protein binding;GO:0005488//binding	GO:1901360//organic cyclic compound metabolic process;GO:0009987//cellular process;GO:0044237//cellular metabolic process;GO:0035303//regulation of dephosphorylation;GO:0031323//regulation of cellular metabolic process;GO:0051174//regulation of phosphorus metabolic process;GO:0050794//regulation of cellular process;GO:0006354//DNA-templated transcription, elongation;GO:0019220//regulation of phos…
XP_014336850	0	567.73	0.001	13.3533	13.7049	7.94e-13	1.6e-10	up	ASAP2	PREDICTED: arf-GAP with SH3 domain, ANK repeat and PH domain-containing protein 2 isoform X11 [Ovis aries musimon]	Cellular Processes;Organismal Systems	Immune system;Transport and catabolism	ko04144//Endocytosis;ko04666//Fc gamma R-mediated phagocytosis	K12488	-	-	GO:0051336//regulation of hydrolase activity;GO:0065009//regulation of molecular function;GO:0065007//biological regulation;GO:0043087//regulation of GTPase activity;GO:0050790//regulation of catalytic activity
XP_005893527	0	227.64	0.001	13.33	13.7024	1.71e-08	1.04e-06	up	ACADM	medium-chain specific acyl-CoA dehydrogenase, mitochondrial precursor [Bos taurus]	Metabolism;Organismal Systems	Global and Overview;Metabolism of other amino acids;Amino acid metabolism;Endocrine system;Carbohydrate metabolism;Lipid metabolism	ko01200//Carbon metabolism;ko03320//PPAR signaling pathway;ko00280//Valine, leucine and isoleucine degradation;ko01212//Fatty acid metabolism;ko00071//Fatty acid degradation;ko00640//Propanoate metabolism;ko00410//beta-Alanine metabolism	K00249	GO:0044446//intracellular organelle part;GO:0043226//organelle;GO:0043231//intracellular membrane-bounded organelle;GO:0044464//cell part;GO:0044429//mitochondrial part;GO:0043229//intracellular organelle;GO:0043227//membrane-bounded organelle;GO:0005737//cytoplasm;GO:0044444//cytoplasmic part;GO:0005739//mitochondrion;GO:0005623//cell;GO:0044424//intracellular part;GO:0005622//intracellular;GO:0…	GO:1901363//heterocyclic compound binding;GO:1901265//nucleoside phosphate binding;GO:0016491//oxidoreductase activity;GO:0036094//small molecule binding;GO:0005488//binding;GO:0003995//acyl-CoA dehydrogenase activity;GO:0097159//organic cyclic compound binding;GO:0016627//oxidoreductase activity, acting on the CH-CH group of donors;GO:0000166//nucleotide binding;GO:0003824//catalytic activity	GO:0048869//cellular developmental process;GO:0044699//single-organism process;GO:0006629//lipid metabolic process;GO:0016042//lipid catabolic process;GO:0008152//metabolic process;GO:0030258//lipid modification;GO:0009062//fatty acid catabolic process;GO:0072358//cardiovascular system development;GO:0044763//single-organism cellular process;GO:0034641//cellular nitrogen compound metabolic proces…
XM_005900499	0	546.473	0.001	13.3067	13.6999	1.93e-14	5.6e-12	up	OTUD4	PREDICTED: Bos mutus OTU deubiquitinase 4 (OTUD4), mRNA	-	-	-	-	-	GO:0005488//binding;GO:0097159//organic cyclic compound binding;GO:0003723//RNA binding;GO:0003676//nucleic acid binding;GO:1901363//heterocyclic compound binding	GO:0044260//cellular macromolecule metabolic process;GO:0071704//organic substance metabolic process;GO:0044238//primary metabolic process;GO:0036211//protein modification process;GO:0044237//cellular metabolic process;GO:0070646//protein modification by small protein removal;GO:0006508//proteolysis;GO:0016579//protein deubiquitination;GO:0009987//cellular process;GO:0044267//cellular protein met…
XP_005901547	0	198.55	0.001	13.29	13.6981	9.44e-08	4.7e-06	up	SEPT2	septin-2 [Bos taurus]	-	-	-	-	GO:0005856//cytoskeleton;GO:0044421//extracellular region part;GO:0005623//cell;GO:0042995//cell projection;GO:0044424//intracellular part;GO:0032153//cell division site;GO:0043231//intracellular membrane-bounded organelle;GO:0044428//nuclear part;GO:0043226//organelle;GO:0044446//intracellular organelle part;GO:0031513//nonmotile primary cilium;GO:0043233//organelle lumen;GO:0043232//intracellul…	GO:0005488//binding;GO:0032549//ribonucleoside binding;GO:0005515//protein binding;GO:1901363//heterocyclic compound binding;GO:0097367//carbohydrate derivative binding;GO:0032550//purine ribonucleoside binding;GO:0036094//small molecule binding;GO:0001883//purine nucleoside binding;GO:0001882//nucleoside binding;GO:0097159//organic cyclic compound binding;GO:0098772//molecular function regulator	GO:0048869//cellular developmental process;GO:0048856//anatomical structure development;GO:0007154//cell communication;GO:0044085//cellular component biogenesis;GO:0006810//transport;GO:0015807//L-amino acid transport;GO:0065007//biological regulation;GO:0051234//establishment of localization;GO:0050794//regulation of cellular process;GO:0015813//L-glutamate transport;GO:0016043//cellular compone…
XM_005906420	0	521.193	0.001	13.2567	13.6944	1.56e-11	2.28e-09	up	MS4A14	PREDICTED: Bos mutus membrane-spanning 4-domains, subfamily A, member 14 (MS4A14), mRNA	-	-	-	-	GO:0044425//membrane part;GO:0031224//intrinsic component of membrane;GO:0016020//membrane	-	-
XM_005895505	0	577.597	0.001	13.2167	13.6901	1.39e-06	5.02e-05	up	PRKCQ	PREDICTED: Bos mutus protein kinase C, theta (PRKCQ), transcript variant X3, mRNA	Organismal Systems;Cellular Processes;Environmental Information Processing	Circulatory system;Sensory system;Signal transduction;Cellular commiunity;Immune system;Endocrine system	ko04530//Tight junction;ko04270//Vascular smooth muscle contraction;ko04660//T cell receptor signaling pathway;ko04750//Inflammatory mediator regulation of TRP channels;ko04064//NF-kappa B signaling pathway;ko04920//Adipocytokine signaling pathway	K18052	-	-	-
XM_005903729	0	342.627	0.001	13.16	13.6839	1.01e-09	8.89e-08	up	CCDC185	PREDICTED: Bos mutus coiled-coil domain containing 185 (CCDC185), mRNA	-	-	-	-	-	-	-
XM_005906883	0	313.99	0.001	13.06	13.6729	2.03e-09	1.65e-07	up	UBQLNL	PREDICTED: Bos mutus ubiquilin-like (UBQLNL), mRNA	Genetic Information Processing	Folding, sorting and degradation	ko04141//Protein processing in endoplasmic reticulum	K04523	-	-	-
XP_014335613	0	99.6333	0.001	13.0033	13.6666	0.00060292	0.00865829	up	TUBB4A	PREDICTED: tubulin beta-4A chain isoform X13 [Orcinus orca]	Cellular Processes	Cellular commiunity;Transport and catabolism	ko04145//Phagosome;ko04540//Gap junction	K07375	GO:0043230//extracellular organelle;GO:0043229//intracellular organelle;GO:0043226//organelle;GO:0043228//non-membrane-bounded organelle;GO:0043231//intracellular membrane-bounded organelle;GO:0044424//intracellular part;GO:0044422//organelle part;GO:0005737//cytoplasm;GO:1903561//extracellular vesicle;GO:0043227//membrane-bounded organelle;GO:0005635//nuclear envelope;GO:0031967//organelle envel…	GO:0019899//enzyme binding;GO:0016818//hydrolase activity, acting on acid anhydrides, in phosphorus-containing anhydrides;GO:0097367//carbohydrate derivative binding;GO:0005488//binding;GO:0017111//nucleoside-triphosphatase activity;GO:0016817//hydrolase activity, acting on acid anhydrides;GO:0042287//MHC protein binding;GO:0005515//protein binding;GO:0036094//small molecule binding;GO:0005102//r…	GO:0044763//single-organism cellular process;GO:0044699//single-organism process;GO:0043933//macromolecular complex subunit organization;GO:0044765//single-organism transport;GO:1902578//single-organism localization;GO:0070271//protein complex biogenesis;GO:0006461//protein complex assembly;GO:0022607//cellular component assembly;GO:0006810//transport;GO:1902580//single-organism cellular localiza…
XP_005895749	0	845.27	0.001	12.9767	13.6636	7.68e-18	5.4e-15	up	ASXL2	KIAA1685 protein [Homo sapiens]	-	-	-	-	GO:0005622//intracellular;GO:0070013//intracellular organelle lumen;GO:0043229//intracellular organelle;GO:0044428//nuclear part;GO:0044446//intracellular organelle part;GO:0044422//organelle part;GO:0043233//organelle lumen;GO:0031981//nuclear lumen;GO:0044464//cell part;GO:0005634//nucleus;GO:0005623//cell;GO:0043227//membrane-bounded organelle;GO:0044424//intracellular part;GO:0043231//intrace…	GO:0005102//receptor binding;GO:0005488//binding;GO:0005515//protein binding	GO:0034654//nucleobase-containing compound biosynthetic process;GO:1901362//organic cyclic compound biosynthetic process;GO:0048522//positive regulation of cellular process;GO:0048584//positive regulation of response to stimulus;GO:0009987//cellular process;GO:0050794//regulation of cellular process;GO:0065007//biological regulation;GO:0008152//metabolic process;GO:0016070//RNA metabolic process;…
XP_005906267	0	248.66	0.001	12.9133	13.6566	1.47e-10	1.61e-08	up	HDAC1	histone deacetylase 1 [Bos taurus]	Organismal Systems;Cellular Processes;Environmental Information Processing	Endocrine system;Cell growth and death;Signal transduction	ko04110//Cell cycle;ko04919//Thyroid hormone signaling pathway;ko04330//Notch signaling pathway	K06067	GO:0031974//membrane-enclosed lumen;GO:0000785//chromatin;GO:0005654//nucleoplasm;GO:0032991//macromolecular complex;GO:0005623//cell;GO:0005694//chromosome;GO:0097458//neuron part;GO:1902494//catalytic complex;GO:0005622//intracellular;GO:0000228//nuclear chromosome;GO:0043232//intracellular non-membrane-bounded organelle;GO:0044454//nuclear chromosome part;GO:0044444//cytoplasmic part;GO:004445…	GO:0001104//RNA polymerase II transcription cofactor activity;GO:0016811//hydrolase activity, acting on carbon-nitrogen (but not peptide) bonds, in linear amides;GO:0001067//regulatory region nucleic acid binding;GO:0003712//transcription cofactor activity;GO:0001012//RNA polymerase II regulatory region DNA binding;GO:0000976//transcription regulatory region sequence-specific DNA binding;GO:00168…	GO:0045595//regulation of cell differentiation;GO:0071310//cellular response to organic substance;GO:0030518//intracellular steroid hormone receptor signaling pathway;GO:0001654//eye development;GO:0032269//negative regulation of cellular protein metabolic process;GO:0030111//regulation of Wnt signaling pathway;GO:0090087//regulation of peptide transport;GO:0043903//regulation of symbiosis, encom…
XP_005904613	0	43.13	0.001	12.8867	13.6536	0.000212598	0.00372131	up	SPATA19	spermatogenesis-associated protein 19, mitochondrial precursor [Bos taurus]	-	-	-	-	GO:0043226//organelle;GO:0043227//membrane-bounded organelle;GO:0044424//intracellular part;GO:0005622//intracellular;GO:0005623//cell;GO:0043229//intracellular organelle;GO:0043231//intracellular membrane-bounded organelle;GO:0044464//cell part	-	GO:0032504//multicellular organism reproduction;GO:0044707//single-multicellular organism process;GO:0022414//reproductive process;GO:0009987//cellular process;GO:0007276//gamete generation;GO:0044763//single-organism cellular process;GO:0044699//single-organism process;GO:0019953//sexual reproduction;GO:0032502//developmental process;GO:0048609//multicellular organismal reproductive process;GO:0…
XP_014333143	0	132.367	0.001	12.8767	13.6525	7.65e-07	2.95e-05	up	PSMA7	PREDICTED: proteasome subunit alpha type-7, partial [Bison bison bison]	Genetic Information Processing	Folding, sorting and degradation	ko03050//Proteasome	K02731	-	-	-
XP_005900754	0	278.04	0.001	12.8633	13.651	7.04e-11	8.4e-09	up	GTF2H1	PREDICTED: general transcription factor IIH subunit 1 [Bos mutus]	Genetic Information Processing	Transcription;Replication and repair	ko03022//Basal transcription factors;ko03420//Nucleotide excision repair	K03141	GO:1990234//transferase complex;GO:0005622//intracellular;GO:0061695//transferase complex, transferring phosphorus-containing groups;GO:0031981//nuclear lumen;GO:0031974//membrane-enclosed lumen;GO:0044446//intracellular organelle part;GO:0070013//intracellular organelle lumen;GO:0044451//nucleoplasm part;GO:0044424//intracellular part;GO:0043229//intracellular organelle;GO:0044428//nuclear part;…	GO:0016787//hydrolase activity;GO:0016301//kinase activity;GO:0042623//ATPase activity, coupled;GO:0017111//nucleoside-triphosphatase activity;GO:0016462//pyrophosphatase activity;GO:0016772//transferase activity, transferring phosphorus-containing groups;GO:0016740//transferase activity;GO:0016887//ATPase activity;GO:0016818//hydrolase activity, acting on acid anhydrides, in phosphorus-containin…	GO:0006259//DNA metabolic process;GO:0019438//aromatic compound biosynthetic process;GO:0071704//organic substance metabolic process;GO:0044249//cellular biosynthetic process;GO:0044238//primary metabolic process;GO:0006974//cellular response to DNA damage stimulus;GO:0044271//cellular nitrogen compound biosynthetic process;GO:0006725//cellular aromatic compound metabolic process;GO:0016070//RNA …
XP_005903994	0	212.317	0.001	12.8433	13.6487	4.65e-09	3.38e-07	up	MOK	PREDICTED: MAPK/MAK/MRK overlapping kinase [Bos mutus]	-	-	-	-	-	GO:0032549//ribonucleoside binding;GO:0016740//transferase activity;GO:0097367//carbohydrate derivative binding;GO:0005488//binding;GO:1901363//heterocyclic compound binding;GO:0001883//purine nucleoside binding;GO:0016772//transferase activity, transferring phosphorus-containing groups;GO:0001882//nucleoside binding;GO:0097159//organic cyclic compound binding;GO:0004672//protein kinase activity;…	GO:0044260//cellular macromolecule metabolic process;GO:0008152//metabolic process;GO:0044237//cellular metabolic process;GO:0009987//cellular process;GO:0044238//primary metabolic process;GO:0044267//cellular protein metabolic process;GO:0071704//organic substance metabolic process;GO:0043170//macromolecule metabolic process;GO:0019538//protein metabolic process;GO:0043412//macromolecule modific…
XP_014334423	0	255.997	0.001	12.79	13.6427	1.24e-10	1.38e-08	up	G3BP1	PREDICTED: ras GTPase-activating protein-binding protein 1 isoform X1 [Bos taurus]	-	-	-	-	GO:0043232//intracellular non-membrane-bounded organelle;GO:0044444//cytoplasmic part;GO:0005912//adherens junction;GO:0005622//intracellular;GO:1990904//ribonucleoprotein complex;GO:0005737//cytoplasm;GO:0036464//cytoplasmic ribonucleoprotein granule;GO:0035770//ribonucleoprotein granule;GO:0044424//intracellular part;GO:0043229//intracellular organelle;GO:0030055//cell-substrate junction;GO:004…	GO:0005488//binding;GO:0044822//poly(A) RNA binding;GO:1901363//heterocyclic compound binding;GO:0097159//organic cyclic compound binding;GO:0003676//nucleic acid binding;GO:0003723//RNA binding	GO:0065007//biological regulation;GO:0048583//regulation of response to stimulus;GO:0010648//negative regulation of cell communication;GO:0050789//regulation of biological process;GO:0023057//negative regulation of signaling;GO:0048585//negative regulation of response to stimulus;GO:0050794//regulation of cellular process;GO:0051234//establishment of localization;GO:0030178//negative regulation o…
XP_005886943	0	93.6633	0.001	12.69	13.6314	1.51e-06	5.42e-05	up	JMJD8	PREDICTED: jmjC domain-containing protein 8 [Bos mutus]	-	-	-	-	-	-	-
XP_005889183	0	328.013	0.001	12.5667	13.6173	2.81e-11	3.82e-09	up	KBTBD2	PREDICTED: kelch repeat and BTB domain-containing protein 2 isoform X1 [Bos taurus]	-	-	-	-	-	-	-
XP_005889832	0	139.747	0.001	12.5667	13.6173	1.07e-07	5.29e-06	up	SH3GL3	PREDICTED: endophilin-A3 isoform X1 [Bos mutus]	Cellular Processes	Transport and catabolism	ko04144//Endocytosis	K11247	GO:0005576//extracellular region;GO:0044421//extracellular region part;GO:0031982//vesicle;GO:1903561//extracellular vesicle;GO:0043230//extracellular organelle;GO:0043226//organelle;GO:0043227//membrane-bounded organelle	GO:0005488//binding;GO:0005515//protein binding	GO:0051234//establishment of localization;GO:0051179//localization;GO:0006810//transport;GO:0016192//vesicle-mediated transport
XP_005904876	0	142.893	0.001	12.5633	13.6169	4.74e-08	2.56e-06	up	SLC25A31	PREDICTED: ADP/ATP translocase 4 [Bos mutus]	Environmental Information Processing	Signal transduction	ko04020//Calcium signaling pathway;ko04022//cGMP - PKG signaling pathway	K05863	-	-	-
XP_005908130	0	25.36	0.001	12.5533	13.6158	0.00277015	0.0290255	up	NDUFC2	PREDICTED: NADH dehydrogenase [ubiquinone] 1 subunit C2 [Bos mutus]	Metabolism	Energy metabolism	ko00190//Oxidative phosphorylation	K03968	GO:0044422//organelle part;GO:0031090//organelle membrane;GO:0016020//membrane;GO:0031967//organelle envelope;GO:0005622//intracellular;GO:0031224//intrinsic component of membrane;GO:0044425//membrane part;GO:0043227//membrane-bounded organelle;GO:0044446//intracellular organelle part;GO:0005623//cell;GO:0044464//cell part;GO:0044424//intracellular part;GO:0019866//organelle inner membrane;GO:004…	GO:0016655//oxidoreductase activity, acting on NAD(P)H, quinone or similar compound as acceptor;GO:0016651//oxidoreductase activity, acting on NAD(P)H;GO:0016491//oxidoreductase activity;GO:0050136//NADH dehydrogenase (quinone) activity;GO:0003824//catalytic activity;GO:0003954//NADH dehydrogenase activity	GO:0044699//single-organism process;GO:0009987//cellular process;GO:0045333//cellular respiration;GO:0044237//cellular metabolic process;GO:0055114//oxidation-reduction process;GO:0044710//single-organism metabolic process;GO:0044763//single-organism cellular process;GO:0022904//respiratory electron transport chain;GO:0022900//electron transport chain;GO:0015980//energy derivation by oxidation of…
XM_005897259	0	60.7933	0.001	12.51	13.6108	5.45e-05	0.00119654	up	FABP12	PREDICTED: Bos mutus fatty acid binding protein 12 (FABP12), mRNA	-	-	-	-	-	GO:0005488//binding	GO:0051234//establishment of localization;GO:0051179//localization
XM_014483498	0	110.003	0.001	12.49	13.6085	4.87e-06	0.000149448	up	LOC106701652	PREDICTED: Bos mutus anthrax toxin receptor-like (LOC106701652), mRNA	-	-	-	-	GO:0044425//membrane part;GO:0016020//membrane;GO:0031224//intrinsic component of membrane	-	-
XP_005901295	0	327.33	0.001	12.4867	13.6081	2.32e-10	2.43e-08	up	IFT81	intraflagellar transport protein 81 homolog [Bos taurus]	-	-	-	-	GO:0031514//motile cilium;GO:0015630//microtubule cytoskeleton;GO:0005622//intracellular;GO:0044424//intracellular part;GO:0043226//organelle;GO:0005929//cilium;GO:0042995//cell projection;GO:0036126//sperm flagellum;GO:0097223//sperm part;GO:0044430//cytoskeletal part;GO:0044422//organelle part;GO:0030990//intraciliary transport particle;GO:0032991//macromolecular complex;GO:0005856//cytoskeleto…	GO:0008092//cytoskeletal protein binding;GO:0005488//binding;GO:0005515//protein binding	GO:0048869//cellular developmental process;GO:0009653//anatomical structure morphogenesis;GO:0032504//multicellular organism reproduction;GO:0051179//localization;GO:0007018//microtubule-based movement;GO:0051704//multi-organism process;GO:0031503//protein complex localization;GO:0006996//organelle organization;GO:0048646//anatomical structure formation involved in morphogenesis;GO:0051641//cellu…
XM_005902856	0	159.88	0.001	12.4567	13.6046	8.46e-07	3.21e-05	up	TEX36	PREDICTED: Bos mutus testis expressed 36 (TEX36), mRNA	-	-	-	-	-	-	-
XP_005900230	0	276.147	0.001	12.3433	13.5914	4.73e-09	3.43e-07	up	MATR3	PREDICTED: matrin-3-like isoform X4 [Bos mutus]	-	-	-	-	GO:0043226//organelle;GO:0043231//intracellular membrane-bounded organelle;GO:0044464//cell part;GO:0005622//intracellular;GO:0043229//intracellular organelle;GO:0043227//membrane-bounded organelle;GO:0044424//intracellular part;GO:0005623//cell	GO:0043167//ion binding;GO:0043169//cation binding;GO:0046914//transition metal ion binding;GO:0097159//organic cyclic compound binding;GO:0005488//binding;GO:0046872//metal ion binding	-
Unigene035067	0	4	0.001	12.3333	13.5903	0.0425502	0.210494	no	-	-	-	-	-	-	-	-	-
XP_005911492	0	90.27	0.001	12.32	13.5887	1.28e-06	4.66e-05	up	RABL3	rab-like protein 3 [Bos taurus]	-	-	-	-	GO:0005623//cell;GO:0044464//cell part	-	GO:0051716//cellular response to stimulus;GO:0050789//regulation of biological process;GO:0023052//signaling;GO:0065007//biological regulation;GO:0044700//single organism signaling;GO:0050896//response to stimulus;GO:0044763//single-organism cellular process;GO:0050794//regulation of cellular process;GO:0009987//cellular process;GO:0035556//intracellular signal transduction;GO:0044699//single-org…
XP_005893117	0	399.817	0.001	12.2833	13.5844	1.5e-13	3.56e-11	up	GOLGA1	PREDICTED: golgin subfamily A member 1 [Bos mutus]	-	-	-	-	-	-	-
XP_005903088	0	90.97	0.001	12.2833	13.5844	0.000298705	0.00490401	up	UBE2R2	ubiquitin-conjugating enzyme E2-32k, partial [Oryctolagus cuniculus]	Genetic Information Processing	Folding, sorting and degradation	ko04120//Ubiquitin mediated proteolysis	K02207	-	-	-
XP_005888663	0	219.443	0.001	12.25	13.5805	8.55e-10	7.73e-08	up	CTDSPL2	CTD small phosphatase-like protein 2 [Bos taurus]	-	-	-	-	-	-	-
XM_005905006	0	293.353	0.001	12.23	13.5781	1.11e-05	0.000306302	up	TSKS	PREDICTED: Bos mutus testis-specific serine kinase substrate (TSKS), transcript variant X2, mRNA	-	-	-	-	-	-	-
XP_005887097	0	153.863	0.001	12.22	13.577	2.91e-08	1.65e-06	up	CAB39	calcium-binding protein 39 [Homo sapiens]	Environmental Information Processing	Signal transduction	ko04152//AMPK signaling pathway;ko04150//mTOR signaling pathway	K08272	GO:0044444//cytoplasmic part;GO:1990234//transferase complex;GO:1902494//catalytic complex;GO:0043226//organelle;GO:0032991//macromolecular complex;GO:0043234//protein complex;GO:0044464//cell part;GO:0005623//cell;GO:0043227//membrane-bounded organelle;GO:0061695//transferase complex, transferring phosphorus-containing groups;GO:0044421//extracellular region part;GO:0031982//vesicle;GO:0005576//…	GO:0008047//enzyme activator activity;GO:0005488//binding;GO:0019899//enzyme binding;GO:0016773//phosphotransferase activity, alcohol group as acceptor;GO:0005515//protein binding;GO:0004672//protein kinase activity;GO:0019209//kinase activator activity;GO:0016301//kinase activity;GO:0019207//kinase regulator activity;GO:0016772//transferase activity, transferring phosphorus-containing groups;GO:…	GO:0001932//regulation of protein phosphorylation;GO:0051347//positive regulation of transferase activity;GO:0006971//hypotonic response;GO:0070271//protein complex biogenesis;GO:0034763//negative regulation of transmembrane transport;GO:0001934//positive regulation of protein phosphorylation;GO:0045859//regulation of protein kinase activity;GO:0051716//cellular response to stimulus;GO:0050896//r…
XM_005892851	0	105.667	0.001	12.2067	13.5754	0.000207758	0.00364727	up	WBSCR28	PREDICTED: Bos mutus Williams-Beuren syndrome chromosome region 28 (WBSCR28), mRNA	-	-	-	-	GO:0044425//membrane part;GO:0031224//intrinsic component of membrane;GO:0016020//membrane	-	-
XP_005889553	0	83.5967	0.001	12.18	13.5722	4.83e-06	0.000148318	up	RAB14	ras-related protein Rab-14 [Mus musculus]	-	-	-	-	-	-	-
XM_014478288	0	177.667	0.001	12.1533	13.5691	1.06e-06	3.91e-05	up	LOC102271059	PREDICTED: Bos mutus spermatogenesis-associated protein 21 (LOC102271059), mRNA	-	-	-	-	-	-	-
XM_014476683	0	106.907	0.001	12.1367	13.5671	9.61e-07	3.6e-05	up	CD320	PREDICTED: Bos mutus CD320 molecule (CD320), transcript variant X2, mRNA	-	-	-	-	GO:0031982//vesicle;GO:0044425//membrane part;GO:1903561//extracellular vesicle;GO:0044421//extracellular region part;GO:0043226//organelle;GO:0031224//intrinsic component of membrane;GO:0043227//membrane-bounded organelle;GO:0043230//extracellular organelle;GO:0016020//membrane;GO:0005576//extracellular region	GO:0005102//receptor binding;GO:0019842//vitamin binding;GO:0036094//small molecule binding;GO:0005515//protein binding;GO:0005488//binding	GO:0044710//single-organism metabolic process;GO:0044281//small molecule metabolic process;GO:0044699//single-organism process;GO:0006766//vitamin metabolic process;GO:0008152//metabolic process
XP_005906598	0	826.193	0.001	12.1033	13.5631	9.71e-20	1.23e-16	up	TOPBP1	DNA topoisomerase 2-binding protein 1 [Bos taurus]	-	-	-	-	GO:0005622//intracellular;GO:0043233//organelle lumen;GO:0044430//cytoskeletal part;GO:0044428//nuclear part;GO:0043228//non-membrane-bounded organelle;GO:0016604//nuclear body;GO:0044446//intracellular organelle part;GO:0005856//cytoskeleton;GO:0044451//nucleoplasm part;GO:0005815//microtubule organizing center;GO:0044464//cell part;GO:0031974//membrane-enclosed lumen;GO:0043231//intracellular m…	GO:0005515//protein binding;GO:0005488//binding	GO:0051716//cellular response to stimulus;GO:0009314//response to radiation;GO:0009628//response to abiotic stimulus;GO:0006950//response to stress;GO:0050896//response to stimulus;GO:0033554//cellular response to stress;GO:0009987//cellular process
XP_014332869	0	140.81	0.001	12.0967	13.5623	0.000155521	0.00286819	up	LOC102274557	PREDICTED: SHC SH2 domain-binding protein 1-like protein-like [Bos mutus]	-	-	-	-	GO:0043232//intracellular non-membrane-bounded organelle;GO:0005819//spindle;GO:0043228//non-membrane-bounded organelle;GO:0044430//cytoskeletal part;GO:0005623//cell;GO:0005856//cytoskeleton;GO:0044424//intracellular part;GO:0044464//cell part;GO:0043229//intracellular organelle;GO:0044446//intracellular organelle part;GO:0044422//organelle part;GO:0043226//organelle;GO:0005622//intracellular;GO…	-	GO:0051276//chromosome organization;GO:0016043//cellular component organization;GO:0006996//organelle organization;GO:0071840//cellular component organization or biogenesis;GO:0009987//cellular process
XP_005887937	0	325.193	0.001	12.0867	13.5611	1.47e-11	2.18e-09	up	APPL1	DCC-interacting protein 13-alpha [Bos taurus]	-	-	-	-	GO:0032991//macromolecular complex;GO:0044424//intracellular part;GO:0031090//organelle membrane;GO:0005634//nucleus;GO:0043227//membrane-bounded organelle;GO:0043229//intracellular organelle;GO:0044464//cell part;GO:1903561//extracellular vesicle;GO:0044451//nucleoplasm part;GO:0043234//protein complex;GO:0005623//cell;GO:0044446//intracellular organelle part;GO:0044422//organelle part;GO:000557…	GO:0005488//binding;GO:0019901//protein kinase binding;GO:0019899//enzyme binding;GO:0005515//protein binding;GO:0019900//kinase binding	GO:0070201//regulation of establishment of protein localization;GO:0032879//regulation of localization;GO:0050789//regulation of biological process;GO:0010827//regulation of glucose transport;GO:0033500//carbohydrate homeostasis;GO:0065007//biological regulation;GO:0032880//regulation of protein localization;GO:0051049//regulation of transport;GO:0065008//regulation of biological quality;GO:00488…
XM_005888552	0	350.13	0.001	12.0567	13.5575	1.82e-08	1.1e-06	up	FAM71A	PREDICTED: Bos mutus family with sequence similarity 71, member A (FAM71A), mRNA	-	-	-	-	GO:0043227//membrane-bounded organelle;GO:0043226//organelle;GO:0043229//intracellular organelle;GO:0044424//intracellular part;GO:0043231//intracellular membrane-bounded organelle;GO:0005623//cell;GO:0044464//cell part;GO:0005622//intracellular	-	-
XM_014481389	0	206.137	0.001	12.0333	13.5547	4.44e-09	3.24e-07	up	LOC106701321	PREDICTED: Bos mutus transmembrane protein 202-like (LOC106701321), transcript variant X1, mRNA	-	-	-	-	GO:0031224//intrinsic component of membrane;GO:0044425//membrane part;GO:0016020//membrane	-	-
XP_005899371	0	331.257	0.001	12.0167	13.5527	2.33e-11	3.24e-09	up	FERMT2	PREDICTED: fermitin family homolog 2 isoform X1 [Odobenus rosmarus divergens]	-	-	-	-	GO:0044430//cytoskeletal part;GO:0044424//intracellular part;GO:0044428//nuclear part;GO:0030054//cell junction;GO:0030055//cell-substrate junction;GO:0015629//actin cytoskeleton;GO:0043292//contractile fiber;GO:0070013//intracellular organelle lumen;GO:0005737//cytoplasm;GO:0005884//actin filament;GO:0042995//cell projection;GO:0098552//side of membrane;GO:0043229//intracellular organelle;GO:009…	GO:1901981//phosphatidylinositol phosphate binding;GO:0035091//phosphatidylinositol binding;GO:0005488//binding;GO:0005543//phospholipid binding;GO:0008289//lipid binding	GO:0022610//biological adhesion;GO:0034329//cell junction assembly;GO:0051716//cellular response to stimulus;GO:0032502//developmental process;GO:0051128//regulation of cellular component organization;GO:0007178//transmembrane receptor protein serine/threonine kinase signaling pathway;GO:0007154//cell communication;GO:0048869//cellular developmental process;GO:0043933//macromolecular complex subu…
XP_014337098	0	187.477	0.001	12.0033	13.5511	6.26e-05	0.0013427	up	PTPN18	PREDICTED: tyrosine-protein phosphatase non-receptor type 18 isoform X1 [Bos taurus]	-	-	-	-	GO:0043226//organelle;GO:0005622//intracellular;GO:0044424//intracellular part;GO:0044464//cell part;GO:0043229//intracellular organelle;GO:0005623//cell;GO:0043227//membrane-bounded organelle;GO:0043231//intracellular membrane-bounded organelle	GO:0004725//protein tyrosine phosphatase activity;GO:0004721//phosphoprotein phosphatase activity;GO:0003824//catalytic activity;GO:0042578//phosphoric ester hydrolase activity;GO:0016788//hydrolase activity, acting on ester bonds;GO:0016791//phosphatase activity;GO:0016787//hydrolase activity	GO:0043412//macromolecule modification;GO:0044237//cellular metabolic process;GO:0019538//protein metabolic process;GO:0016311//dephosphorylation;GO:0006470//protein dephosphorylation;GO:0044260//cellular macromolecule metabolic process;GO:0043170//macromolecule metabolic process;GO:0044238//primary metabolic process;GO:0044267//cellular protein metabolic process;GO:0036211//protein modification …
XP_005901296	0	102.79	0.001	11.98	13.5483	0.000236566	0.00405047	up	PPTC7	PREDICTED: protein phosphatase PTC7 homolog [Bos mutus]	-	-	-	-	GO:0005622//intracellular;GO:0044424//intracellular part;GO:0005623//cell;GO:0043227//membrane-bounded organelle;GO:0043229//intracellular organelle;GO:0043231//intracellular membrane-bounded organelle;GO:0043226//organelle;GO:0044464//cell part	GO:0043167//ion binding;GO:0003824//catalytic activity;GO:0005488//binding;GO:0043169//cation binding	GO:0036211//protein modification process;GO:0043412//macromolecule modification;GO:0044260//cellular macromolecule metabolic process;GO:0044238//primary metabolic process;GO:0008152//metabolic process;GO:0006464//cellular protein modification process;GO:0071704//organic substance metabolic process;GO:0009987//cellular process;GO:0044267//cellular protein metabolic process;GO:0019538//protein meta…
XP_014335172	0	190.507	0.001	11.9733	13.5475	2.68e-08	1.54e-06	up	STK39	PREDICTED: STE20/SPS1-related proline-alanine-rich protein kinase isoform X2 [Bison bison bison]	-	-	-	-	GO:0016020//membrane;GO:0005886//plasma membrane;GO:0044464//cell part;GO:0071944//cell periphery;GO:0005623//cell	GO:0016772//transferase activity, transferring phosphorus-containing groups;GO:0032549//ribonucleoside binding;GO:0032550//purine ribonucleoside binding;GO:0016773//phosphotransferase activity, alcohol group as acceptor;GO:0004672//protein kinase activity;GO:0003824//catalytic activity;GO:0097159//organic cyclic compound binding;GO:0016301//kinase activity;GO:0005488//binding;GO:0001883//purine n…	GO:0032409//regulation of transporter activity;GO:0006950//response to stress;GO:0032879//regulation of localization;GO:0044707//single-multicellular organism process;GO:0043412//macromolecule modification;GO:0050878//regulation of body fluid levels;GO:0044260//cellular macromolecule metabolic process;GO:0003013//circulatory system process;GO:0008152//metabolic process;GO:0009628//response to abi…
XP_005907647	0	97.24	0.001	11.8467	13.5322	1.01e-06	3.74e-05	up	LOC102265558	PREDICTED: protein C21orf2 homolog [Bos mutus]	-	-	-	-	GO:0016020//membrane	-	GO:0044767//single-organism developmental process;GO:0016043//cellular component organization;GO:0051716//cellular response to stimulus;GO:0007154//cell communication;GO:0009987//cellular process;GO:0032502//developmental process;GO:0048869//cellular developmental process;GO:0050789//regulation of biological process;GO:0007166//cell surface receptor signaling pathway;GO:0009653//anatomical struct…
XM_005908193	0	69.19	0.001	11.84	13.5314	3.5e-05	0.000814724	up	LOC102273771	PREDICTED: Bos mutus uncharacterized LOC102273771 (LOC102273771), mRNA	-	-	-	-	GO:0031224//intrinsic component of membrane;GO:0044425//membrane part;GO:0016020//membrane	-	-
XP_005908028	0	326.137	0.001	11.79	13.5253	1.93e-11	2.76e-09	up	SRP68	PREDICTED: signal recognition particle subunit SRP68 isoform X1 [Bos mutus]	Genetic Information Processing	Folding, sorting and degradation	ko03060//Protein export	K03107	-	-	-
XP_005887094	0	320.853	0.001	11.76	13.5216	8.91e-12	1.4e-09	up	ARMC9	PREDICTED: lisH domain-containing protein ARMC9 isoform X3 [Bison bison bison]	-	-	-	-	-	-	-
XP_005908135	0	97.1567	0.001	11.7467	13.52	9.66e-07	3.61e-05	up	HDHD2	haloacid dehalogenase-like hydrolase domain-containing protein 2 [Bos taurus]	-	-	-	-	-	-	-
XP_005890222	0	539.94	0.001	11.7267	13.5175	1.06e-14	3.35e-12	up	TACC2	PREDICTED: transforming acidic coiled-coil-containing protein 2-like isoform X2 [Bos mutus]	-	-	-	-	-	-	-
XP_005905390	0	328.653	0.001	11.72	13.5167	8.52e-06	0.000242951	up	LOC102266786	PREDICTED: angiotensin-converting enzyme-like isoform X1 [Bos mutus]	Organismal Systems	Endocrine system	ko04924//Renin secretion;ko04614//Renin-angiotensin system	K01283	GO:0044464//cell part;GO:0005623//cell;GO:0016020//membrane;GO:0031224//intrinsic component of membrane;GO:0005622//intracellular;GO:0044425//membrane part;GO:0044424//intracellular part	GO:0070011//peptidase activity, acting on L-amino acid peptides;GO:0008233//peptidase activity;GO:0003824//catalytic activity;GO:0043167//ion binding;GO:0005488//binding;GO:0043169//cation binding;GO:0016787//hydrolase activity;GO:0008238//exopeptidase activity	GO:0007276//gamete generation;GO:0008015//blood circulation;GO:0019538//protein metabolic process;GO:0002376//immune system process;GO:0002252//immune effector process;GO:0031954//positive regulation of protein autophosphorylation;GO:0018119//peptidyl-cysteine S-nitrosylation;GO:0051174//regulation of phosphorus metabolic process;GO:0032270//positive regulation of cellular protein metabolic proce…
XP_005904560	0	347.137	0.001	11.6967	13.5138	4.34e-12	7.24e-10	up	RANBP9	PREDICTED: ran-binding protein 9 [Bos mutus]	-	-	-	-	-	GO:0005488//binding;GO:0005515//protein binding	GO:0010646//regulation of cell communication;GO:0010648//negative regulation of cell communication;GO:0048519//negative regulation of biological process;GO:1902532//negative regulation of intracellular signal transduction;GO:0010605//negative regulation of macromolecule metabolic process;GO:0001932//regulation of protein phosphorylation;GO:0019220//regulation of phosphate metabolic process;GO:004…
XP_005890244	0	481.1	0.001	11.6933	13.5134	0.000603487	0.00866419	up	ITGB1	PREDICTED: integrin beta-1 isoform X1 [Bison bison bison]	Environmental Information Processing;Cellular Processes;Organismal Systems	Signaling molecules and interaction;Immune system;Transport and catabolism;Signal transduction;Development;Cell motility;Cellular commiunity	ko04151//PI3K-Akt signaling pathway;ko04510//Focal adhesion;ko04810//Regulation of actin cytoskeleton;ko04015//Rap1 signaling pathway;ko04145//Phagosome;ko04360//Axon guidance;ko04514//Cell adhesion molecules (CAMs);ko04670//Leukocyte transendothelial migration;ko04611//Platelet activation;ko04512//ECM-receptor interaction	K05719	GO:0044463//cell projection part;GO:0044456//synapse part;GO:0005737//cytoplasm;GO:0098796//membrane protein complex;GO:0044424//intracellular part;GO:0043229//intracellular organelle;GO:0031224//intrinsic component of membrane;GO:0048770//pigment granule;GO:0043230//extracellular organelle;GO:0031226//intrinsic component of plasma membrane;GO:0012505//endomembrane system;GO:0005924//cell-substra…	GO:0005515//protein binding;GO:0032403//protein complex binding;GO:0008092//cytoskeletal protein binding;GO:0044877//macromolecular complex binding;GO:0043169//cation binding;GO:0005488//binding;GO:0060089//molecular transducer activity;GO:0043167//ion binding;GO:0019899//enzyme binding;GO:0005102//receptor binding;GO:0046983//protein dimerization activity;GO:0005518//collagen binding;GO:0019956/…	GO:0045123//cellular extravasation;GO:0009790//embryo development;GO:0007010//cytoskeleton organization;GO:1902580//single-organism cellular localization;GO:0030239//myofibril assembly;GO:0070727//cellular macromolecule localization;GO:0031589//cell-substrate adhesion;GO:0032501//multicellular organismal process;GO:0035556//intracellular signal transduction;GO:0002040//sprouting angiogenesis;GO:0…
XP_005890100	0	144.003	0.001	11.6367	13.5064	1.61e-06	5.72e-05	up	BCL2L14	PREDICTED: apoptosis facilitator Bcl-2-like protein 14 isoform X1 [Bos mutus]	-	-	-	-	GO:0005622//intracellular;GO:0005623//cell;GO:0005737//cytoplasm;GO:0044444//cytoplasmic part;GO:0044464//cell part;GO:0044424//intracellular part;GO:0043226//organelle	GO:0019900//kinase binding;GO:0005488//binding;GO:0019899//enzyme binding;GO:0005515//protein binding	GO:0006915//apoptotic process;GO:0050789//regulation of biological process;GO:0009987//cellular process;GO:0097190//apoptotic signaling pathway;GO:0050794//regulation of cellular process;GO:0044763//single-organism cellular process;GO:0007166//cell surface receptor signaling pathway;GO:0007154//cell communication;GO:0097191//extrinsic apoptotic signaling pathway;GO:0044700//single organism signal…
XP_005892028	0	140.803	0.001	11.4767	13.4864	1.8e-05	0.000462664	up	FBXO32	F-box only protein 32 [Bos taurus]	Environmental Information Processing	Signal transduction	ko04068//FoxO signaling pathway	K10305	-	-	-
XP_005911295	0	338.547	0.001	11.4367	13.4814	5.35e-11	6.61e-09	up	KIF1BP	PREDICTED: KIF1-binding protein [Bos mutus]	-	-	-	-	-	GO:0008092//cytoskeletal protein binding;GO:0005515//protein binding;GO:0005488//binding	GO:1902578//single-organism localization;GO:0051234//establishment of localization;GO:0051179//localization;GO:0046907//intracellular transport;GO:0044765//single-organism transport;GO:0044699//single-organism process;GO:1902582//single-organism intracellular transport;GO:0006810//transport;GO:0051641//cellular localization;GO:0051649//establishment of localization in cell;GO:1902580//single-orga…
XM_005887419	0	98.3333	0.001	11.41	13.478	2.08e-05	0.000522162	up	LOC102268192	PREDICTED: Bos mutus dnaJ homolog subfamily B member 6 (LOC102268192), mRNA	-	-	-	-	GO:0044424//intracellular part;GO:0005623//cell;GO:0043231//intracellular membrane-bounded organelle;GO:0043227//membrane-bounded organelle;GO:0005622//intracellular;GO:0043229//intracellular organelle;GO:0043226//organelle;GO:0044464//cell part	-	-
XP_005892885	0	107.66	0.001	11.4033	13.4772	0.000745195	0.0102124	up	YWHAG	14-3-3 protein gamma [Rattus norvegicus]	Cellular Processes	Cell growth and death	ko04114//Oocyte meiosis;ko04110//Cell cycle	K16198	GO:0016020//membrane;GO:0005912//adherens junction;GO:0005924//cell-substrate adherens junction;GO:0044464//cell part;GO:0070161//anchoring junction;GO:0044444//cytoplasmic part;GO:0043231//intracellular membrane-bounded organelle;GO:0030054//cell junction;GO:1903561//extracellular vesicle;GO:0043230//extracellular organelle;GO:0044421//extracellular region part;GO:0044424//intracellular part;GO:…	GO:0004857//enzyme inhibitor activity;GO:0019887//protein kinase regulator activity;GO:0003676//nucleic acid binding;GO:0005515//protein binding;GO:0019899//enzyme binding;GO:0005102//receptor binding;GO:0098772//molecular function regulator;GO:0003723//RNA binding;GO:0019901//protein kinase binding;GO:0019210//kinase inhibitor activity;GO:0030234//enzyme regulator activity;GO:0097159//organic cy…	GO:0050789//regulation of biological process;GO:0070727//cellular macromolecule localization;GO:0008152//metabolic process;GO:0007154//cell communication;GO:0034613//cellular protein localization;GO:0080090//regulation of primary metabolic process;GO:0006915//apoptotic process;GO:0051179//localization;GO:0048731//system development;GO:0042221//response to chemical;GO:0051246//regulation of protei…
XM_014479397	0	47	0.001	11.4	13.4767	0.00048912	0.00732756	up	LOC102274485	PREDICTED: Bos mutus chromosome unknown open reading frame, human C17orf50 (LOC102274485), mRNA	-	-	-	-	-	-	-
XP_005904592	0	158.083	0.001	11.4	13.4767	3.91e-08	2.15e-06	up	SPRYD7	PREDICTED: SPRY domain-containing protein 7 isoform X2 [Callithrix jacchus]	-	-	-	-	-	-	-
XP_005897822	0	323.603	0.001	11.3967	13.4763	1.39e-11	2.08e-09	up	RHPN2	PREDICTED: rhophilin-2 [Bos mutus]	-	-	-	-	GO:0043227//membrane-bounded organelle;GO:0043226//organelle;GO:0005737//cytoplasm;GO:0005634//nucleus;GO:0043231//intracellular membrane-bounded organelle;GO:0044444//cytoplasmic part;GO:0044428//nuclear part;GO:0005622//intracellular;GO:0043229//intracellular organelle;GO:0043233//organelle lumen;GO:0044464//cell part;GO:0031974//membrane-enclosed lumen;GO:0044422//organelle part;GO:0005623//ce…	-	GO:0007154//cell communication;GO:0044699//single-organism process;GO:0009987//cellular process;GO:0044763//single-organism cellular process
XM_005894431	0	324.303	0.001	11.38	13.4742	1.44e-05	0.000381191	up	ADD1	PREDICTED: Bos mutus adducin 1 (alpha) (ADD1), transcript variant X3, mRNA	-	-	-	-	GO:0030055//cell-substrate junction;GO:0031974//membrane-enclosed lumen;GO:0005856//cytoskeleton;GO:0070013//intracellular organelle lumen;GO:0044424//intracellular part;GO:0043226//organelle;GO:0030054//cell junction;GO:0043227//membrane-bounded organelle;GO:0043229//intracellular organelle;GO:0031981//nuclear lumen;GO:0043233//organelle lumen;GO:0005924//cell-substrate adherens junction;GO:0005…	GO:0005515//protein binding;GO:0008092//cytoskeletal protein binding;GO:0003723//RNA binding;GO:0097159//organic cyclic compound binding;GO:0005488//binding;GO:0003676//nucleic acid binding;GO:0003779//actin binding;GO:0046983//protein dimerization activity;GO:1901363//heterocyclic compound binding	GO:1901880//negative regulation of protein depolymerization;GO:0042592//homeostatic process;GO:0032535//regulation of cellular component size;GO:0050789//regulation of biological process;GO:0031333//negative regulation of protein complex assembly;GO:0048856//anatomical structure development;GO:0002520//immune system development;GO:0050794//regulation of cellular process;GO:0043244//regulation of …
XP_005900127	0	70.59	0.001	11.3767	13.4738	6.66e-06	0.000195585	up	CCDC25	coiled-coil domain-containing protein 25 [Bos taurus]	-	-	-	-	-	-	-
XM_014478491	0	332.14	0.001	11.33	13.4679	5.59e-10	5.28e-08	up	TSNAXIP1	PREDICTED: Bos mutus translin-associated factor X interacting protein 1 (TSNAXIP1), mRNA	-	-	-	-	-	-	-
XP_005909698	0	507.317	0.001	11.33	13.4679	6.81e-14	1.75e-11	up	SART3	PREDICTED: squamous cell carcinoma antigen recognized by T-cells 3 [Bos mutus]	-	-	-	-	GO:0005634//nucleus;GO:0044424//intracellular part;GO:1990904//ribonucleoprotein complex;GO:0031974//membrane-enclosed lumen;GO:0097525//spliceosomal snRNP complex;GO:0005622//intracellular;GO:0044422//organelle part;GO:0044464//cell part;GO:0043229//intracellular organelle;GO:0016604//nuclear body;GO:0030532//small nuclear ribonucleoprotein complex;GO:0005623//cell;GO:0044451//nucleoplasm part;G…	GO:0097159//organic cyclic compound binding;GO:0003676//nucleic acid binding;GO:0005515//protein binding;GO:0002020//protease binding;GO:0017069//snRNA binding;GO:0019899//enzyme binding;GO:0003723//RNA binding;GO:0005488//binding;GO:1901363//heterocyclic compound binding	GO:0016070//RNA metabolic process;GO:0044763//single-organism cellular process;GO:0036211//protein modification process;GO:0034622//cellular macromolecular complex assembly;GO:0044707//single-multicellular organism process;GO:0070647//protein modification by small protein conjugation or removal;GO:0065007//biological regulation;GO:0006397//mRNA processing;GO:0032502//developmental process;GO:0006…
XM_014481973	0	84.0333	0.001	11.3267	13.4674	1.15e-05	0.000315669	up	LOC106701401	PREDICTED: Bos mutus uncharacterized LOC106701401 (LOC106701401), transcript variant X1, mRNA	-	-	-	-	-	-	-
XP_005893072	0	235.983	0.001	11.3267	13.4674	3.83e-10	3.8e-08	up	SPAST	PREDICTED: spastin [Bison bison bison]	-	-	-	-	-	-	-
XP_005911502	0	137.58	0.001	11.3233	13.467	2.46e-07	1.1e-05	up	ZRANB2	PREDICTED: zinc finger Ran-binding domain-containing protein 2 isoform X1 [Bos taurus]	-	-	-	-	GO:0044446//intracellular organelle part;GO:0005623//cell;GO:0043227//membrane-bounded organelle;GO:0043229//intracellular organelle;GO:0005634//nucleus;GO:0005622//intracellular;GO:0043233//organelle lumen;GO:0044422//organelle part;GO:0044424//intracellular part;GO:0043226//organelle;GO:0044428//nuclear part;GO:0070013//intracellular organelle lumen;GO:0044464//cell part;GO:0031981//nuclear lum…	GO:0043167//ion binding;GO:0046872//metal ion binding;GO:0046914//transition metal ion binding;GO:0003676//nucleic acid binding;GO:1901363//heterocyclic compound binding;GO:0003723//RNA binding;GO:0043169//cation binding;GO:0001071//nucleic acid binding transcription factor activity;GO:0097159//organic cyclic compound binding;GO:0005488//binding	GO:0044237//cellular metabolic process;GO:0008152//metabolic process;GO:0009059//macromolecule biosynthetic process;GO:0018130//heterocycle biosynthetic process;GO:0044249//cellular biosynthetic process;GO:0046483//heterocycle metabolic process;GO:0044238//primary metabolic process;GO:0006396//RNA processing;GO:1901576//organic substance biosynthetic process;GO:0016070//RNA metabolic process;GO:0…
XM_005909134	0	80.8133	0.001	11.3167	13.4662	3.8e-05	0.000874497	up	EFCAB9	PREDICTED: Bos mutus EF-hand calcium binding domain 9 (EFCAB9), transcript variant X1, mRNA	-	-	-	-	-	-	-
XP_005888134	0	123.68	0.001	11.3133	13.4657	1.64e-07	7.65e-06	up	LDB1	PREDICTED: LIM domain-binding protein 1 isoform X2 [Bos mutus]	-	-	-	-	GO:0043226//organelle;GO:0032991//macromolecular complex;GO:0043234//protein complex;GO:0043227//membrane-bounded organelle;GO:0044424//intracellular part;GO:0043229//intracellular organelle;GO:0043231//intracellular membrane-bounded organelle;GO:0005622//intracellular;GO:0005623//cell;GO:0044464//cell part	GO:0008134//transcription factor binding;GO:0044877//macromolecular complex binding;GO:0003690//double-stranded DNA binding;GO:0046983//protein dimerization activity;GO:0005488//binding;GO:0097159//organic cyclic compound binding;GO:1901363//heterocyclic compound binding;GO:0043565//sequence-specific DNA binding;GO:0019904//protein domain specific binding;GO:0003712//transcription cofactor activi…	GO:0034101//erythrocyte homeostasis;GO:0048518//positive regulation of biological process;GO:0010467//gene expression;GO:0009790//embryo development;GO:0034641//cellular nitrogen compound metabolic process;GO:0042633//hair cycle;GO:0009059//macromolecule biosynthetic process;GO:0019827//stem cell population maintenance;GO:0050794//regulation of cellular process;GO:1901576//organic substance biosy…
XP_005893606	0	105.69	0.001	11.31	13.4653	0.000210631	0.00369187	up	SSR1	PREDICTED: translocon-associated protein subunit alpha [Bos mutus]	Genetic Information Processing	Folding, sorting and degradation	ko04141//Protein processing in endoplasmic reticulum	K13249	GO:0044424//intracellular part;GO:0044464//cell part;GO:0043229//intracellular organelle;GO:0044425//membrane part;GO:0042175//nuclear outer membrane-endoplasmic reticulum membrane network;GO:0043227//membrane-bounded organelle;GO:0043226//organelle;GO:0005622//intracellular;GO:0005623//cell;GO:0031224//intrinsic component of membrane;GO:0012505//endomembrane system;GO:0043231//intracellular memb…	-	-
XP_005900850	0	344.273	0.001	11.2833	13.4619	1.12e-11	1.71e-09	up	TESK1	PREDICTED: dual specificity testis-specific protein kinase 1 [Bos mutus]	-	-	-	-	-	GO:0016740//transferase activity;GO:0032550//purine ribonucleoside binding;GO:0036094//small molecule binding;GO:0016772//transferase activity, transferring phosphorus-containing groups;GO:0097159//organic cyclic compound binding;GO:0043169//cation binding;GO:0005488//binding;GO:0003824//catalytic activity;GO:0043167//ion binding;GO:0032549//ribonucleoside binding;GO:0097367//carbohydrate derivat…	GO:0044238//primary metabolic process;GO:0044267//cellular protein metabolic process;GO:0044237//cellular metabolic process;GO:0006464//cellular protein modification process;GO:0043412//macromolecule modification;GO:0044260//cellular macromolecule metabolic process;GO:0009987//cellular process;GO:0006793//phosphorus metabolic process;GO:0043170//macromolecule metabolic process;GO:0006796//phospha…
XP_005902005	0	129.773	0.001	11.2667	13.4598	4.9e-07	2e-05	up	KIAA1191	UPF0498 protein KIAA1191-like protein, partial [Bos mutus]	-	-	-	-	-	-	-
XP_005891994	0	356.757	0.001	11.2233	13.4542	7.99e-13	1.6e-10	up	EPC1	PREDICTED: enhancer of polycomb homolog 1 isoform X4 [Bos mutus]	-	-	-	-	GO:0043233//organelle lumen;GO:0005654//nucleoplasm;GO:0043226//organelle;GO:0000123//histone acetyltransferase complex;GO:0031967//organelle envelope;GO:0031248//protein acetyltransferase complex;GO:0044464//cell part;GO:0044451//nucleoplasm part;GO:0032991//macromolecular complex;GO:1990234//transferase complex;GO:0043189//H4/H2A histone acetyltransferase complex;GO:0005622//intracellular;GO:00…	GO:0016410//N-acyltransferase activity;GO:0061733//peptide-lysine-N-acetyltransferase activity;GO:0016746//transferase activity, transferring acyl groups;GO:0016747//transferase activity, transferring acyl groups other than amino-acyl groups;GO:0003824//catalytic activity;GO:0034212//peptide N-acetyltransferase activity;GO:0016740//transferase activity;GO:0016407//acetyltransferase activity;GO:00…	GO:0009058//biosynthetic process;GO:0006725//cellular aromatic compound metabolic process;GO:0071840//cellular component organization or biogenesis;GO:0010468//regulation of gene expression;GO:0016070//RNA metabolic process;GO:0050789//regulation of biological process;GO:0009059//macromolecule biosynthetic process;GO:0019222//regulation of metabolic process;GO:0006473//protein acetylation;GO:0043…
XP_005903220	0	536.957	0.001	11.22	13.4538	1.94e-14	5.6e-12	up	TRAPPC11	PREDICTED: trafficking protein particle complex subunit 11 isoform X2 [Bos mutus]	-	-	-	-	-	-	GO:0051179//localization;GO:0006810//transport;GO:0051234//establishment of localization
XP_005892346	0	569.29	0.001	11.2133	13.4529	1.73e-06	6.09e-05	up	SUCO	PREDICTED: SUN domain-containing ossification factor isoform X3 [Bos mutus]	-	-	-	-	-	-	GO:0044699//single-organism process;GO:0048518//positive regulation of biological process;GO:0030154//cell differentiation;GO:0009987//cellular process;GO:0001503//ossification;GO:0009893//positive regulation of metabolic process;GO:0010556//regulation of macromolecule biosynthetic process;GO:0032501//multicellular organismal process;GO:0010604//positive regulation of macromolecule metabolic proc…
XP_005894721	0	354.243	0.001	11.2033	13.4516	1.46e-09	1.22e-07	up	SDHA	PREDICTED: succinate dehydrogenase [ubiquinone] flavoprotein subunit, mitochondrial [Bos mutus]	Metabolism	Global and Overview;Carbohydrate metabolism;Energy metabolism	ko00190//Oxidative phosphorylation;ko01200//Carbon metabolism;ko00020//Citrate cycle (TCA cycle)	K00234	GO:0043229//intracellular organelle;GO:0044422//organelle part;GO:0031090//organelle membrane;GO:0031975//envelope;GO:0031967//organelle envelope;GO:0044446//intracellular organelle part;GO:0044424//intracellular part;GO:0019866//organelle inner membrane;GO:0005737//cytoplasm;GO:0044464//cell part;GO:0043226//organelle;GO:0005622//intracellular;GO:0043227//membrane-bounded organelle;GO:0043231//i…	GO:0003824//catalytic activity;GO:0016491//oxidoreductase activity;GO:0016627//oxidoreductase activity, acting on the CH-CH group of donors;GO:1901265//nucleoside phosphate binding;GO:0005488//binding;GO:0036094//small molecule binding;GO:0000104//succinate dehydrogenase activity;GO:1901363//heterocyclic compound binding;GO:0000166//nucleotide binding;GO:0097159//organic cyclic compound binding	GO:0044237//cellular metabolic process;GO:0044710//single-organism metabolic process;GO:0044281//small molecule metabolic process;GO:0006091//generation of precursor metabolites and energy;GO:0032501//multicellular organismal process;GO:0006082//organic acid metabolic process;GO:0055114//oxidation-reduction process;GO:0048856//anatomical structure development;GO:0044707//single-multicellular orga…
XP_005890559	0	44.0167	0.001	11.1367	13.443	8.23e-05	0.00168305	up	CDKN1A	cyclin-dependent kinase inhibitor 1 [Bos taurus]	Organismal Systems;Cellular Processes;Environmental Information Processing	Endocrine system;Cell growth and death;Signal transduction	ko04151//PI3K-Akt signaling pathway;ko04921//Oxytocin signaling pathway;ko04068//FoxO signaling pathway;ko04110//Cell cycle;ko04066//HIF-1 signaling pathway;ko04012//ErbB signaling pathway;ko04115//p53 signaling pathway	K06625	GO:0043226//organelle;GO:0032991//macromolecular complex;GO:0005737//cytoplasm;GO:0043231//intracellular membrane-bounded organelle;GO:0043229//intracellular organelle;GO:0043234//protein complex;GO:0044464//cell part;GO:0005622//intracellular;GO:0044444//cytoplasmic part;GO:0044424//intracellular part;GO:0043227//membrane-bounded organelle;GO:0005623//cell	GO:0019899//enzyme binding;GO:0003824//catalytic activity;GO:0016301//kinase activity;GO:0043167//ion binding;GO:0044389//ubiquitin-like protein ligase binding;GO:0005515//protein binding;GO:0098772//molecular function regulator;GO:0004672//protein kinase activity;GO:0019887//protein kinase regulator activity;GO:0030234//enzyme regulator activity;GO:0016773//phosphotransferase activity, alcohol g…	GO:0044237//cellular metabolic process;GO:0050789//regulation of biological process;GO:0044767//single-organism developmental process;GO:0065009//regulation of molecular function;GO:0050794//regulation of cellular process;GO:0045786//negative regulation of cell cycle;GO:0048523//negative regulation of cellular process;GO:0006950//response to stress;GO:0001934//positive regulation of protein phosp…
XP_005910976	0	179.243	0.001	11.1033	13.4387	1.57e-08	9.68e-07	up	PPP4R2	PREDICTED: serine/threonine-protein phosphatase 4 regulatory subunit 2 [Bos taurus]	-	-	-	-	GO:0005622//intracellular;GO:0008287//protein serine/threonine phosphatase complex;GO:0043226//organelle;GO:0043229//intracellular organelle;GO:1903293//phosphatase complex;GO:0043234//protein complex;GO:0044422//organelle part;GO:0031981//nuclear lumen;GO:0044446//intracellular organelle part;GO:1902494//catalytic complex;GO:0005623//cell;GO:0044428//nuclear part;GO:0044424//intracellular part;G…	GO:0005515//protein binding;GO:0019208//phosphatase regulator activity;GO:0019888//protein phosphatase regulator activity;GO:0030234//enzyme regulator activity;GO:0005488//binding;GO:0098772//molecular function regulator	GO:0000018//regulation of DNA recombination;GO:0019219//regulation of nucleobase-containing compound metabolic process;GO:0060255//regulation of macromolecule metabolic process;GO:0050789//regulation of biological process;GO:0051052//regulation of DNA metabolic process;GO:0051171//regulation of nitrogen compound metabolic process;GO:0080090//regulation of primary metabolic process;GO:0019222//reg…
XP_005910587	0	179.31	0.001	11.0833	13.4361	6.31e-09	4.45e-07	up	TFDP1	transcription factor Dp-1 [Bos taurus]	Environmental Information Processing;Cellular Processes	Cell growth and death;Signal transduction	ko04110//Cell cycle;ko04350//TGF-beta signaling pathway	K04683	-	-	-
XM_005906195	0	266.92	0.001	11.0467	13.4313	1.69e-09	1.39e-07	up	KPNA6	PREDICTED: Bos mutus karyopherin alpha 6 (importin alpha 7) (KPNA6), transcript variant X2, mRNA	-	-	-	-	-	-	-
XP_005900710	0	237.067	0.001	11.0367	13.43	1.31e-07	6.31e-06	up	SEPT4	PREDICTED: septin-4 isoform X3 [Bos taurus]	-	-	-	-	GO:0044446//intracellular organelle part;GO:0044464//cell part;GO:0036126//sperm flagellum;GO:0044422//organelle part;GO:0043231//intracellular membrane-bounded organelle;GO:0005929//cilium;GO:0043229//intracellular organelle;GO:0031514//motile cilium;GO:0043227//membrane-bounded organelle;GO:0005623//cell;GO:0043226//organelle;GO:0044424//intracellular part;GO:0097223//sperm part;GO:0044428//nuc…	GO:0001882//nucleoside binding;GO:0032550//purine ribonucleoside binding;GO:0032549//ribonucleoside binding;GO:1901363//heterocyclic compound binding;GO:0097159//organic cyclic compound binding;GO:0005488//binding;GO:0001883//purine nucleoside binding;GO:0036094//small molecule binding;GO:0097367//carbohydrate derivative binding	GO:0007399//nervous system development;GO:0019538//protein metabolic process;GO:0032502//developmental process;GO:0007275//multicellular organism development;GO:0065007//biological regulation;GO:0097193//intrinsic apoptotic signaling pathway;GO:0022412//cellular process involved in reproduction in multicellular organism;GO:0044267//cellular protein metabolic process;GO:0044703//multi-organism rep…
XM_005888768	0	174.13	0.001	11.0267	13.4287	6e-05	0.0012973	up	TFDP2	PREDICTED: Bos mutus transcription factor Dp-2 (E2F dimerization partner 2) (TFDP2), transcript variant X3, mRNA	Cellular Processes	Cell growth and death	ko04110//Cell cycle	K09392	-	-	-
XP_005891995	0	447.953	0.001	11.0067	13.4261	3.58e-06	0.000113348	up	KIF5B	PREDICTED: kinesin-1 heavy chain isoform X2 [Bison bison bison]	Cellular Processes;Organismal Systems	Transport and catabolism;Nervous system	ko04144//Endocytosis;ko04728//Dopaminergic synapse	K10396	-	-	-
XP_005909757	0	785.04	0.001	11	13.4252	9.64e-11	1.1e-08	up	COL1A2	PREDICTED: collagen alpha-2(I) chain [Bos mutus]	Cellular Processes;Organismal Systems;Environmental Information Processing	Digestive system;Immune system;Signaling molecules and interaction;Cellular commiunity;Signal transduction	ko04151//PI3K-Akt signaling pathway;ko04510//Focal adhesion;ko04611//Platelet activation;ko04974//Protein digestion and absorption;ko04512//ECM-receptor interaction	K06236	-	-	GO:0044699//single-organism process
XP_005907545	0	94	0.001	10.9933	13.4243	3.99e-05	0.000910628	up	LOC102281949	PREDICTED: cell division cycle-associated protein 3-like [Bos mutus]	-	-	-	-	-	-	-
XP_005896074	0	132.43	0.001	10.99	13.4239	2.26e-07	1.02e-05	up	NDRG3	PREDICTED: protein NDRG3 isoform X2 [Bison bison bison]	-	-	-	-	-	-	-
XP_005887444	0	318.14	0.001	10.9767	13.4222	1.66e-08	1.01e-06	up	DDX4	PREDICTED: LOW QUALITY PROTEIN: probable ATP-dependent RNA helicase DDX4 [Bos mutus]	-	-	-	-	-	-	-
XP_005893232	0	251.22	0.001	10.9467	13.4182	2.71e-07	1.19e-05	up	FBXO24	PREDICTED: F-box only protein 24 isoform X1 [Bos mutus]	-	-	-	-	-	-	-
XP_005904548	0	173.42	0.001	10.9333	13.4164	9.27e-09	6.23e-07	up	SNX4	PREDICTED: sorting nexin-4 [Bos mutus]	Cellular Processes	Transport and catabolism	ko04144//Endocytosis	K17919	-	-	-
XM_005895650	0	1061.39	0.001	10.92	13.4147	1.67e-19	1.97e-16	up	PUM2	PREDICTED: Bos mutus pumilio RNA-binding family member 2 (PUM2), transcript variant X1, mRNA	-	-	-	-	GO:0031967//organelle envelope;GO:0030529//intracellular ribonucleoprotein complex;GO:0005635//nuclear envelope;GO:0043228//non-membrane-bounded organelle;GO:0005623//cell;GO:0043227//membrane-bounded organelle;GO:0044428//nuclear part;GO:0044424//intracellular part;GO:0005634//nucleus;GO:0044422//organelle part;GO:0012505//endomembrane system;GO:0036464//cytoplasmic ribonucleoprotein granule;GO:…	GO:0003723//RNA binding;GO:1901363//heterocyclic compound binding;GO:0097159//organic cyclic compound binding;GO:0005488//binding;GO:0044822//poly(A) RNA binding;GO:0003676//nucleic acid binding;GO:0003729//mRNA binding	GO:0060148//positive regulation of posttranscriptional gene silencing;GO:0002699//positive regulation of immune effector process;GO:0071840//cellular component organization or biogenesis;GO:0071826//ribonucleoprotein complex subunit organization;GO:0050789//regulation of biological process;GO:0048518//positive regulation of biological process;GO:0016043//cellular component organization;GO:0043933…
XP_005902545	0	6.19	0.001	10.92	13.4147	0.0167472	0.111718	no	CDC26	PREDICTED: anaphase-promoting complex subunit CDC26 isoform X1 [Bos taurus]	Cellular Processes;Organismal Systems;Genetic Information Processing	Cell growth and death;Endocrine system;Folding, sorting and degradation	ko04120//Ubiquitin mediated proteolysis;ko04114//Oocyte meiosis;ko04110//Cell cycle;ko04914//Progesterone-mediated oocyte maturation	K03359	GO:0043229//intracellular organelle;GO:0044428//nuclear part;GO:0043227//membrane-bounded organelle;GO:0005634//nucleus;GO:0044446//intracellular organelle part;GO:1990234//transferase complex;GO:1902494//catalytic complex;GO:0000151//ubiquitin ligase complex;GO:0043231//intracellular membrane-bounded organelle;GO:0044424//intracellular part;GO:0043226//organelle;GO:0043234//protein complex;GO:00…	-	GO:0070647//protein modification by small protein conjugation or removal;GO:0010965//regulation of mitotic sister chromatid separation;GO:0065007//biological regulation;GO:0044784//metaphase/anaphase transition of cell cycle;GO:0043632//modification-dependent macromolecule catabolic process;GO:0050789//regulation of biological process;GO:1903047//mitotic cell cycle process;GO:0044237//cellular me…
XM_014481363	0	350.467	0.001	10.8733	13.4085	3.07e-11	4.14e-09	up	MAK	PREDICTED: Bos mutus male germ cell-associated kinase (MAK), transcript variant X1, mRNA	-	-	-	-	GO:0072372//primary cilium;GO:0031513//nonmotile primary cilium;GO:0005856//cytoskeleton;GO:0043227//membrane-bounded organelle;GO:0005819//spindle;GO:0005622//intracellular;GO:0005929//cilium;GO:0044464//cell part;GO:0005623//cell;GO:0005815//microtubule organizing center;GO:0044422//organelle part;GO:0042995//cell projection;GO:0097458//neuron part;GO:0044424//intracellular part;GO:0043232//int…	GO:0036094//small molecule binding;GO:0016740//transferase activity;GO:0001882//nucleoside binding;GO:0097367//carbohydrate derivative binding;GO:0097159//organic cyclic compound binding;GO:0003824//catalytic activity;GO:0000988//transcription factor activity, protein binding;GO:0003712//transcription cofactor activity;GO:1901363//heterocyclic compound binding;GO:0004672//protein kinase activity;…	GO:0001894//tissue homeostasis;GO:0097659//nucleic acid-templated transcription;GO:0044249//cellular biosynthetic process;GO:0019438//aromatic compound biosynthetic process;GO:0006807//nitrogen compound metabolic process;GO:0090304//nucleic acid metabolic process;GO:0009059//macromolecule biosynthetic process;GO:0034641//cellular nitrogen compound metabolic process;GO:0009987//cellular process;GO…
XP_014338748	0	36.2033	0.001	10.8367	13.4036	0.000145392	0.00271017	up	LOC106701607	D-tyrosyl-tRNA(Tyr) deacylase 1 [Fukomys damarensis]	-	-	-	-	GO:0044424//intracellular part;GO:0043231//intracellular membrane-bounded organelle;GO:0044464//cell part;GO:0043226//organelle;GO:0043229//intracellular organelle;GO:0005622//intracellular;GO:0043227//membrane-bounded organelle;GO:0005623//cell	-	-
XP_014338661	0	93.0867	0.001	10.8267	13.4023	2.56e-06	8.54e-05	up	FAM188A	PREDICTED: protein FAM188A isoform X3 [Ovis aries musimon]	-	-	-	-	GO:0070013//intracellular organelle lumen;GO:0005635//nuclear envelope;GO:0043229//intracellular organelle;GO:0012505//endomembrane system;GO:0031967//organelle envelope;GO:0044422//organelle part;GO:0044424//intracellular part;GO:0043231//intracellular membrane-bounded organelle;GO:0005622//intracellular;GO:0044428//nuclear part;GO:0043227//membrane-bounded organelle;GO:0031975//envelope;GO:0031…	-	GO:0012501//programmed cell death;GO:0044763//single-organism cellular process;GO:0044699//single-organism process;GO:0008219//cell death;GO:0009987//cellular process
XM_005892465	0	290.797	0.001	10.8233	13.4019	1.55e-07	7.26e-06	up	CYLC1	PREDICTED: Bos mutus cylicin, basic protein of sperm head cytoskeleton 1 (CYLC1), mRNA	-	-	-	-	GO:0048471//perinuclear region of cytoplasm;GO:0043228//non-membrane-bounded organelle;GO:0033011//perinuclear theca;GO:0005856//cytoskeleton;GO:0043232//intracellular non-membrane-bounded organelle;GO:0044424//intracellular part;GO:0044444//cytoplasmic part;GO:0005737//cytoplasm;GO:0099503//secretory vesicle;GO:0005622//intracellular;GO:0031410//cytoplasmic vesicle;GO:0097708//intracellular vesi…	-	GO:0007276//gamete generation;GO:0044702//single organism reproductive process;GO:0032501//multicellular organismal process;GO:0044767//single-organism developmental process;GO:0044763//single-organism cellular process;GO:0044707//single-multicellular organism process;GO:0000003//reproduction;GO:0044703//multi-organism reproductive process;GO:0051704//multi-organism process;GO:0009987//cellular p…
XP_005898367	0	339.977	0.001	10.8067	13.3996	3.64e-09	2.7e-07	up	COMP	PREDICTED: cartilage oligomeric matrix protein [Bos mutus]	Environmental Information Processing;Cellular Processes	Cellular commiunity;Signal transduction;Transport and catabolism;Signaling molecules and interaction	ko04151//PI3K-Akt signaling pathway;ko04510//Focal adhesion;ko04145//Phagosome;ko04512//ECM-receptor interaction	K04659	GO:0005576//extracellular region;GO:0043230//extracellular organelle;GO:0043227//membrane-bounded organelle;GO:0031982//vesicle;GO:0031012//extracellular matrix;GO:1903561//extracellular vesicle;GO:0044421//extracellular region part;GO:0043226//organelle	GO:0005515//protein binding;GO:0032403//protein complex binding;GO:0046872//metal ion binding;GO:0005539//glycosaminoglycan binding;GO:0044877//macromolecular complex binding;GO:0005488//binding;GO:0097367//carbohydrate derivative binding;GO:0043168//anion binding;GO:0043167//ion binding;GO:0043169//cation binding	GO:0044699//single-organism process;GO:0035265//organ growth;GO:0048856//anatomical structure development;GO:0098868//bone growth;GO:0032501//multicellular organismal process;GO:0012501//programmed cell death;GO:0007275//multicellular organism development;GO:0044707//single-multicellular organism process;GO:0044763//single-organism cellular process;GO:0032502//developmental process;GO:0048736//ap…
XP_005898930	0	436.627	0.001	10.79	13.3974	6.98e-14	1.78e-11	up	OSBPL1A	PREDICTED: oxysterol-binding protein-related protein 1 isoform X1 [Bos mutus]	-	-	-	-	GO:0044444//cytoplasmic part;GO:0031974//membrane-enclosed lumen;GO:0043230//extracellular organelle;GO:0031981//nuclear lumen;GO:0005622//intracellular;GO:0012505//endomembrane system;GO:0070013//intracellular organelle lumen;GO:0005737//cytoplasm;GO:0044446//intracellular organelle part;GO:0043231//intracellular membrane-bounded organelle;GO:1903561//extracellular vesicle;GO:0005576//extracellu…	GO:0032934//sterol binding;GO:0008289//lipid binding;GO:0005496//steroid binding;GO:0005488//binding;GO:0097159//organic cyclic compound binding	GO:0051234//establishment of localization;GO:0010876//lipid localization;GO:0051179//localization;GO:0033036//macromolecule localization
XP_005903426	0	164.973	0.001	10.7733	13.3952	6.21e-05	0.00133518	up	SLC35A5	PREDICTED: probable UDP-sugar transporter protein SLC35A5 isoform X1 [Bos mutus]	-	-	-	-	GO:0016020//membrane;GO:0031224//intrinsic component of membrane;GO:0044425//membrane part	GO:0015294//solute:cation symporter activity;GO:0022857//transmembrane transporter activity;GO:1901476//carbohydrate transporter activity;GO:0015144//carbohydrate transmembrane transporter activity;GO:0015293//symporter activity;GO:0022892//substrate-specific transporter activity;GO:0051119//sugar transmembrane transporter activity;GO:0008324//cation transmembrane transporter activity;GO:0022804/…	GO:0044765//single-organism transport;GO:0051179//localization;GO:0006818//hydrogen transport;GO:1902578//single-organism localization;GO:0006810//transport;GO:0044699//single-organism process;GO:0051234//establishment of localization
XP_005890617	0	427.46	0.001	10.77	13.3947	4.87e-13	1.03e-10	up	SUPT5H	PREDICTED: transcription elongation factor SPT5 isoform X3 [Bos mutus]	-	-	-	-	GO:0005623//cell;GO:0043231//intracellular membrane-bounded organelle;GO:0044422//organelle part;GO:0070013//intracellular organelle lumen;GO:0043233//organelle lumen;GO:0005634//nucleus;GO:0044464//cell part;GO:0044424//intracellular part;GO:0031974//membrane-enclosed lumen;GO:0031981//nuclear lumen;GO:0044451//nucleoplasm part;GO:0044428//nuclear part;GO:0043227//membrane-bounded organelle;GO:0…	GO:0003723//RNA binding;GO:0003676//nucleic acid binding;GO:1901363//heterocyclic compound binding;GO:0008135//translation factor activity, RNA binding;GO:0005488//binding;GO:0097159//organic cyclic compound binding;GO:0046983//protein dimerization activity;GO:0005515//protein binding	GO:0048522//positive regulation of cellular process;GO:0071840//cellular component organization or biogenesis;GO:0046483//heterocycle metabolic process;GO:1901564//organonitrogen compound metabolic process;GO:0071704//organic substance metabolic process;GO:0097659//nucleic acid-templated transcription;GO:0010506//regulation of autophagy;GO:0009058//biosynthetic process;GO:0016043//cellular compon…
XP_014332823	0	76.3167	0.001	10.67	13.3813	5.09e-06	0.000155688	up	RHBDD2	PREDICTED: rhomboid domain-containing protein 2 isoform X1 [Bos taurus]	-	-	-	-	GO:0005737//cytoplasm;GO:0012505//endomembrane system;GO:0043229//intracellular organelle;GO:0043231//intracellular membrane-bounded organelle;GO:0044425//membrane part;GO:0044424//intracellular part;GO:0044444//cytoplasmic part;GO:0044422//organelle part;GO:0005623//cell;GO:0044464//cell part;GO:0031224//intrinsic component of membrane;GO:0005622//intracellular;GO:0044446//intracellular organell…	GO:0003824//catalytic activity;GO:0008233//peptidase activity;GO:0016787//hydrolase activity;GO:0070011//peptidase activity, acting on L-amino acid peptides;GO:0004175//endopeptidase activity	GO:0043170//macromolecule metabolic process;GO:0071704//organic substance metabolic process;GO:0008152//metabolic process;GO:0044238//primary metabolic process;GO:0019538//protein metabolic process
XP_005897321	0	27.8733	0.001	10.6633	13.3804	0.00199482	0.0223426	up	FABP12	PREDICTED: fatty acid-binding protein 12 [Bos mutus]	-	-	-	-	-	GO:0005488//binding	GO:0051234//establishment of localization;GO:0051179//localization
XP_005891590	0	334.267	0.001	10.62	13.3745	1.09e-05	0.000300066	up	CUL4B	PREDICTED: cullin-4B isoform X4 [Ovis aries]	Genetic Information Processing	Replication and repair;Folding, sorting and degradation	ko04120//Ubiquitin mediated proteolysis;ko03420//Nucleotide excision repair	K10609	-	-	-
XP_005895494	0	226.157	0.001	10.6167	13.374	7.16e-09	4.98e-07	up	HOMEZ	PREDICTED: LOW QUALITY PROTEIN: homeobox and leucine zipper protein Homez [Bos mutus]	-	-	-	-	-	-	-
XP_014333299	0	214.793	0.001	10.6067	13.3727	1.34e-09	1.14e-07	up	FAM114A2	PREDICTED: protein FAM114A2 [Bos mutus]	-	-	-	-	-	-	-
XM_014481025	0	225.917	0.001	10.6	13.3718	1.55e-08	9.62e-07	up	LOC106701274	PREDICTED: Bos mutus transmembrane protein 180 (LOC106701274), mRNA	-	-	-	-	GO:0044425//membrane part;GO:0031224//intrinsic component of membrane;GO:0016020//membrane	-	-
XP_005904562	0	64.6367	0.001	10.6	13.3718	1.72e-05	0.000444451	up	CD83	PREDICTED: CD83 antigen isoform X1 [Bos mutus]	-	-	-	-	-	-	-
XP_014332365	0	76.4233	0.001	10.5933	13.3709	0.000591866	0.00852064	up	PSMB8	PREDICTED: proteasome subunit beta type-8 [Bos mutus]	Genetic Information Processing	Folding, sorting and degradation	ko03050//Proteasome	K02740	GO:0043230//extracellular organelle;GO:1903561//extracellular vesicle;GO:0000502//proteasome complex;GO:1902494//catalytic complex;GO:0043227//membrane-bounded organelle;GO:0005622//intracellular;GO:0044424//intracellular part;GO:0043234//protein complex;GO:0044464//cell part;GO:1905368//peptidase complex;GO:0043229//intracellular organelle;GO:1905369//endopeptidase complex;GO:0031982//vesicle;GO…	GO:0008233//peptidase activity;GO:0070011//peptidase activity, acting on L-amino acid peptides;GO:0004175//endopeptidase activity;GO:0003824//catalytic activity;GO:0016787//hydrolase activity	GO:0032502//developmental process;GO:0019538//protein metabolic process;GO:0006508//proteolysis;GO:0030154//cell differentiation;GO:0044699//single-organism process;GO:0044763//single-organism cellular process;GO:0044238//primary metabolic process;GO:0043170//macromolecule metabolic process;GO:0044767//single-organism developmental process;GO:0048869//cellular developmental process;GO:0009987//ce…
XP_005894442	0	139.557	0.001	10.59	13.3704	1.97e-07	9.02e-06	up	KLF5	PREDICTED: Krueppel-like factor 5 [Bos mutus]	-	-	-	-	GO:0016020//membrane;GO:0044446//intracellular organelle part;GO:0043231//intracellular membrane-bounded organelle;GO:0043229//intracellular organelle;GO:0044428//nuclear part;GO:0043227//membrane-bounded organelle;GO:0043233//organelle lumen;GO:0044464//cell part;GO:0005634//nucleus;GO:0005622//intracellular;GO:0044422//organelle part;GO:0031974//membrane-enclosed lumen;GO:0005623//cell;GO:00432…	GO:0001071//nucleic acid binding transcription factor activity;GO:0043565//sequence-specific DNA binding;GO:0003690//double-stranded DNA binding;GO:0043167//ion binding;GO:1901363//heterocyclic compound binding;GO:1990837//sequence-specific double-stranded DNA binding;GO:0005488//binding;GO:0000975//regulatory region DNA binding;GO:0001012//RNA polymerase II regulatory region DNA binding;GO:00442…	GO:0009059//macromolecule biosynthetic process;GO:0044237//cellular metabolic process;GO:0044260//cellular macromolecule metabolic process;GO:0006351//transcription, DNA-templated;GO:1901576//organic substance biosynthetic process;GO:0006366//transcription from RNA polymerase II promoter;GO:0044249//cellular biosynthetic process;GO:0090304//nucleic acid metabolic process;GO:0010467//gene expressi…
XP_005900226	0	201.913	0.001	10.5867	13.37	5.85e-05	0.00126901	up	SIL1	PREDICTED: nucleotide exchange factor SIL1 [Bos mutus]	Genetic Information Processing	Folding, sorting and degradation	ko04141//Protein processing in endoplasmic reticulum	K14001	GO:0044444//cytoplasmic part;GO:0043229//intracellular organelle;GO:0005622//intracellular;GO:0043226//organelle;GO:0044424//intracellular part;GO:0005737//cytoplasm;GO:0044432//endoplasmic reticulum part;GO:0043231//intracellular membrane-bounded organelle;GO:0043227//membrane-bounded organelle;GO:0044446//intracellular organelle part;GO:0044464//cell part;GO:0044422//organelle part;GO:0005623//…	-	GO:0008104//protein localization;GO:0033036//macromolecule localization;GO:0051234//establishment of localization;GO:0051179//localization
XP_014338265	0	100.267	0.001	10.5833	13.3695	7.28e-07	2.83e-05	up	RHEB	PREDICTED: GTP-binding protein Rheb [Aptenodytes forsteri]	Environmental Information Processing;Organismal Systems	Signal transduction;Endocrine system	ko04151//PI3K-Akt signaling pathway;ko04910//Insulin signaling pathway;ko04152//AMPK signaling pathway;ko04919//Thyroid hormone signaling pathway;ko04150//mTOR signaling pathway	K07208	GO:0044421//extracellular region part;GO:0044424//intracellular part;GO:0044464//cell part;GO:0043230//extracellular organelle;GO:1903561//extracellular vesicle;GO:0043226//organelle;GO:0031982//vesicle;GO:0043227//membrane-bounded organelle;GO:1990904//ribonucleoprotein complex;GO:0030529//intracellular ribonucleoprotein complex;GO:0005576//extracellular region;GO:0005622//intracellular;GO:00056…	GO:1901363//heterocyclic compound binding;GO:0001883//purine nucleoside binding;GO:0032549//ribonucleoside binding;GO:0001882//nucleoside binding;GO:0019899//enzyme binding;GO:0036094//small molecule binding;GO:0097367//carbohydrate derivative binding;GO:0032550//purine ribonucleoside binding;GO:0019900//kinase binding;GO:0097159//organic cyclic compound binding;GO:0005515//protein binding;GO:000…	GO:0048513//animal organ development;GO:0007275//multicellular organism development;GO:0051240//positive regulation of multicellular organismal process;GO:0014015//positive regulation of gliogenesis;GO:0031929//TOR signaling;GO:0044707//single-multicellular organism process;GO:0044767//single-organism developmental process;GO:0007154//cell communication;GO:0002064//epithelial cell development;GO:…
XM_005890270	0	715.5	0.001	10.58	13.3691	6.76e-19	6.82e-16	up	SPAG9	PREDICTED: Bos mutus sperm associated antigen 9 (SPAG9), transcript variant X4, mRNA	-	-	-	-	-	-	-
XP_005899368	0	159.087	0.001	10.5767	13.3686	4.48e-07	1.85e-05	up	FAM81B	PREDICTED: protein FAM81B [Bos mutus]	-	-	-	-	-	-	-
XP_005897461	0.02	324.007	0.001	10.5733	13.3681	5.22e-12	8.59e-10	up	CDC73	PREDICTED: parafibromin [Pantholops hodgsonii]	-	-	-	-	GO:0044428//nuclear part;GO:0031974//membrane-enclosed lumen;GO:0043228//non-membrane-bounded organelle;GO:0044424//intracellular part;GO:0000781//chromosome, telomeric region;GO:0043227//membrane-bounded organelle;GO:0031981//nuclear lumen;GO:0005623//cell;GO:0005654//nucleoplasm;GO:0043229//intracellular organelle;GO:0008023//transcription elongation factor complex;GO:0005622//intracellular;GO:…	GO:0005515//protein binding;GO:0001099//basal RNA polymerase II transcription machinery binding;GO:0005488//binding;GO:0001098//basal transcription machinery binding	GO:0031124//mRNA 3'-end processing;GO:0007492//endoderm development;GO:0032496//response to lipopolysaccharide;GO:0044271//cellular nitrogen compound biosynthetic process;GO:0043933//macromolecular complex subunit organization;GO:0044260//cellular macromolecule metabolic process;GO:1903047//mitotic cell cycle process;GO:0032446//protein modification by small protein conjugation;GO:0007165//signal…
XP_005899165	0	440.593	0.001	10.57	13.3677	2.62e-11	3.58e-09	up	BCLAF1	PREDICTED: bcl-2-associated transcription factor 1 isoform X1 [Ovis aries]	-	-	-	-	GO:0005623//cell;GO:0044428//nuclear part;GO:0031981//nuclear lumen;GO:0044464//cell part;GO:0005634//nucleus;GO:0016604//nuclear body;GO:0043227//membrane-bounded organelle;GO:0043233//organelle lumen;GO:0043231//intracellular membrane-bounded organelle;GO:0031974//membrane-enclosed lumen;GO:0005654//nucleoplasm;GO:0044424//intracellular part;GO:0044446//intracellular organelle part;GO:0043229//…	GO:0097159//organic cyclic compound binding;GO:0003676//nucleic acid binding;GO:0005488//binding;GO:1901363//heterocyclic compound binding;GO:0003723//RNA binding	GO:0006807//nitrogen compound metabolic process;GO:0044700//single organism signaling;GO:0019219//regulation of nucleobase-containing compound metabolic process;GO:0032774//RNA biosynthetic process;GO:0060255//regulation of macromolecule metabolic process;GO:0006355//regulation of transcription, DNA-templated;GO:0050794//regulation of cellular process;GO:0012501//programmed cell death;GO:0007154/…
XP_005902038	0	203.42	0.001	10.5067	13.359	5.51e-09	3.94e-07	up	PACSIN2	PREDICTED: protein kinase C and casein kinase substrate in neurons protein 2 [Bos mutus]	-	-	-	-	-	-	-
XP_005906595	0	56.6733	0.001	10.5067	13.359	0.00236401	0.0255292	up	PRND	prion-like protein doppel precursor [Bos taurus]	-	-	-	-	-	-	-
XP_005893815	0	216.413	0.001	10.48	13.3554	1.38e-09	1.16e-07	up	ATL2	PREDICTED: atlastin-2 isoform X2 [Bos taurus]	-	-	-	-	GO:0044464//cell part;GO:0043231//intracellular membrane-bounded organelle;GO:0005622//intracellular;GO:0044425//membrane part;GO:0031224//intrinsic component of membrane;GO:0043229//intracellular organelle;GO:0005623//cell;GO:0043227//membrane-bounded organelle;GO:0016020//membrane;GO:0044424//intracellular part;GO:0043226//organelle	GO:0001882//nucleoside binding;GO:0005488//binding;GO:0005515//protein binding;GO:1901363//heterocyclic compound binding;GO:0032550//purine ribonucleoside binding;GO:0032549//ribonucleoside binding;GO:0097367//carbohydrate derivative binding;GO:0097159//organic cyclic compound binding;GO:0036094//small molecule binding;GO:0001883//purine nucleoside binding	GO:0006461//protein complex assembly;GO:0009987//cellular process;GO:0065003//macromolecular complex assembly;GO:0071840//cellular component organization or biogenesis;GO:0071822//protein complex subunit organization;GO:0051259//protein oligomerization;GO:0022607//cellular component assembly;GO:0006996//organelle organization;GO:0016043//cellular component organization;GO:0044085//cellular compon…
XP_005895970	0	143.007	0.001	10.4633	13.3531	8.76e-08	4.4e-06	up	PPP1R8	nuclear inhibitor of protein phosphatase 1 isoform alpha [Homo sapiens]	-	-	-	-	GO:0030529//intracellular ribonucleoprotein complex;GO:0032991//macromolecular complex;GO:0044428//nuclear part;GO:0044422//organelle part;GO:0044451//nucleoplasm part;GO:0005623//cell;GO:0016604//nuclear body;GO:0044424//intracellular part;GO:0043229//intracellular organelle;GO:0005622//intracellular;GO:0005634//nucleus;GO:0031974//membrane-enclosed lumen;GO:0043227//membrane-bounded organelle;G…	GO:0098772//molecular function regulator;GO:0003824//catalytic activity;GO:0004864//protein phosphatase inhibitor activity;GO:0003676//nucleic acid binding;GO:0030234//enzyme regulator activity;GO:1901363//heterocyclic compound binding;GO:0019212//phosphatase inhibitor activity;GO:0004857//enzyme inhibitor activity;GO:0004540//ribonuclease activity;GO:0097159//organic cyclic compound binding;GO:0…	GO:0010467//gene expression;GO:0006396//RNA processing;GO:0006139//nucleobase-containing compound metabolic process;GO:0006351//transcription, DNA-templated;GO:0044238//primary metabolic process;GO:0006807//nitrogen compound metabolic process;GO:0008152//metabolic process;GO:0018130//heterocycle biosynthetic process;GO:0090304//nucleic acid metabolic process;GO:1901362//organic cyclic compound bi…
XP_005889209	0	421.647	0.001	10.4567	13.3521	8.31e-10	7.54e-08	up	GARS	PREDICTED: glycine--tRNA ligase [Bos mutus]	Genetic Information Processing	Translation	ko00970//Aminoacyl-tRNA biosynthesis	K01880	GO:0005622//intracellular;GO:0005634//nucleus;GO:0043229//intracellular organelle;GO:0042995//cell projection;GO:0044421//extracellular region part;GO:0005623//cell;GO:0070013//intracellular organelle lumen;GO:0012505//endomembrane system;GO:0044464//cell part;GO:0043233//organelle lumen;GO:0031981//nuclear lumen;GO:0044446//intracellular organelle part;GO:0031974//membrane-enclosed lumen;GO:0043…	GO:0032549//ribonucleoside binding;GO:0097367//carbohydrate derivative binding;GO:0001883//purine nucleoside binding;GO:0005488//binding;GO:0036094//small molecule binding;GO:0016875//ligase activity, forming carbon-oxygen bonds;GO:1901363//heterocyclic compound binding;GO:0001882//nucleoside binding;GO:0016874//ligase activity;GO:0003824//catalytic activity;GO:0005515//protein binding;GO:0004812…	GO:0006412//translation;GO:0043436//oxoacid metabolic process;GO:0044238//primary metabolic process;GO:0006520//cellular amino acid metabolic process;GO:0055086//nucleobase-containing small molecule metabolic process;GO:1901293//nucleoside phosphate biosynthetic process;GO:0008152//metabolic process;GO:0044763//single-organism cellular process;GO:1901566//organonitrogen compound biosynthetic proc…
XP_014336927	0	126.433	0.001	10.45	13.3512	3.97e-07	1.66e-05	up	RDH11	PREDICTED: retinol dehydrogenase 11 [Bison bison bison]	Metabolism	Metabolism of cofactors and vitamins	ko00830//Retinol metabolism	K11152	-	GO:0016614//oxidoreductase activity, acting on CH-OH group of donors;GO:0003824//catalytic activity;GO:0008106//alcohol dehydrogenase (NADP+) activity;GO:0016491//oxidoreductase activity;GO:0004033//aldo-keto reductase (NADP) activity;GO:0016616//oxidoreductase activity, acting on the CH-OH group of donors, NAD or NADP as acceptor	GO:0009584//detection of visible light;GO:0044238//primary metabolic process;GO:0007165//signal transduction;GO:0071704//organic substance metabolic process;GO:0023052//signaling;GO:0007603//phototransduction, visible light;GO:0001523//retinoid metabolic process;GO:0071478//cellular response to radiation;GO:0071214//cellular response to abiotic stimulus;GO:0006721//terpenoid metabolic process;GO:…
XP_005907979	0	595.44	0.001	10.4167	13.3466	7.31e-14	1.85e-11	up	TNKS	PREDICTED: tankyrase-1-like [Bos mutus]	-	-	-	-	GO:0044422//organelle part;GO:0044464//cell part;GO:0005623//cell;GO:0005622//intracellular;GO:0043227//membrane-bounded organelle;GO:0044446//intracellular organelle part;GO:0044427//chromosomal part;GO:0005694//chromosome;GO:0043228//non-membrane-bounded organelle;GO:0005737//cytoplasm;GO:0043229//intracellular organelle;GO:0044444//cytoplasmic part;GO:0044424//intracellular part;GO:0043231//in…	GO:0016757//transferase activity, transferring glycosyl groups;GO:0043167//ion binding;GO:0016740//transferase activity;GO:0043169//cation binding;GO:0003824//catalytic activity;GO:0046914//transition metal ion binding;GO:0005488//binding;GO:0016763//transferase activity, transferring pentosyl groups;GO:0046872//metal ion binding	GO:0006793//phosphorus metabolic process;GO:0044271//cellular nitrogen compound biosynthetic process;GO:0034654//nucleobase-containing compound biosynthetic process;GO:0071704//organic substance metabolic process;GO:0045935//positive regulation of nucleobase-containing compound metabolic process;GO:0009966//regulation of signal transduction;GO:0048583//regulation of response to stimulus;GO:002260…
XP_005894053	0	50.4367	0.001	10.4067	13.3452	4.22e-05	0.000956828	up	MRGBP	MRG-binding protein, partial [Bos mutus]	-	-	-	-	-	-	-
XM_014481415	0	186.123	0.001	10.38	13.3415	8.32e-09	5.71e-07	up	ADORA3	PREDICTED: Bos mutus adenosine A3 receptor (ADORA3), transcript variant X1, mRNA	-	-	-	-	GO:0044425//membrane part;GO:0016020//membrane;GO:0031224//intrinsic component of membrane	GO:0099600//transmembrane receptor activity;GO:0060089//molecular transducer activity;GO:0004871//signal transducer activity;GO:0038023//signaling receptor activity;GO:0004888//transmembrane signaling receptor activity;GO:0004872//receptor activity	GO:0007166//cell surface receptor signaling pathway;GO:0050794//regulation of cellular process;GO:0007154//cell communication;GO:0065007//biological regulation;GO:0009987//cellular process;GO:0035588//G-protein coupled purinergic receptor signaling pathway;GO:0050896//response to stimulus;GO:0044763//single-organism cellular process;GO:0044700//single organism signaling;GO:0007186//G-protein coup…
XP_005908615	0	140.693	0.001	10.38	13.3415	7.53e-08	3.85e-06	up	PCMTD2	PREDICTED: protein-L-isoaspartate O-methyltransferase domain-containing protein 2 isoform X1 [Bos mutus]	-	-	-	-	GO:0044464//cell part;GO:0044424//intracellular part;GO:0005622//intracellular;GO:0005623//cell	GO:0005488//binding	GO:0044260//cellular macromolecule metabolic process;GO:0043412//macromolecule modification;GO:0036211//protein modification process;GO:0071704//organic substance metabolic process;GO:0019538//protein metabolic process;GO:0044237//cellular metabolic process;GO:0044267//cellular protein metabolic process;GO:0043170//macromolecule metabolic process;GO:0009987//cellular process;GO:0006464//cellular …
XP_005901496	0	193.83	0.001	10.3733	13.3406	0.000149747	0.00277834	up	PRKAR2B	PREDICTED: cAMP-dependent protein kinase type II-beta regulatory subunit [Bos mutus]	Cellular Processes;Organismal Systems	Endocrine system;Cell growth and death	ko04910//Insulin signaling pathway;ko04210//Apoptosis	K04739	GO:0098805//whole membrane;GO:0044446//intracellular organelle part;GO:0097458//neuron part;GO:0044441//ciliary part;GO:0044422//organelle part;GO:0005576//extracellular region;GO:0005929//cilium;GO:0044464//cell part;GO:0015630//microtubule cytoskeleton;GO:0044425//membrane part;GO:0098857//membrane microdomain;GO:0043229//intracellular organelle;GO:0042995//cell projection;GO:0043005//neuron pr…	GO:0005488//binding;GO:0004860//protein kinase inhibitor activity;GO:0016772//transferase activity, transferring phosphorus-containing groups;GO:0030234//enzyme regulator activity;GO:0019887//protein kinase regulator activity;GO:0000166//nucleotide binding;GO:1901363//heterocyclic compound binding;GO:0003824//catalytic activity;GO:0004857//enzyme inhibitor activity;GO:0036094//small molecule bind…	GO:0007610//behavior;GO:0043549//regulation of kinase activity;GO:0050789//regulation of biological process;GO:0003008//system process;GO:0044281//small molecule metabolic process;GO:0050790//regulation of catalytic activity;GO:0051174//regulation of phosphorus metabolic process;GO:0010563//negative regulation of phosphorus metabolic process;GO:0051338//regulation of transferase activity;GO:00098…
XP_005887943	0	712.467	0.001	10.37	13.3401	7.94e-17	4.19e-14	up	FAM208A	PREDICTED: protein FAM208A isoform X2 [Bos taurus]	-	-	-	-	-	-	-
XP_005910482	0	183.05	0.001	10.36	13.3387	1.7e-08	1.03e-06	up	LMAN1	PREDICTED: protein ERGIC-53 [Bos mutus]	Genetic Information Processing	Folding, sorting and degradation	ko04141//Protein processing in endoplasmic reticulum	K10080	GO:0043230//extracellular organelle;GO:0044217//other organism part;GO:0044215//other organism;GO:0044216//other organism cell;GO:0044464//cell part;GO:0043232//intracellular non-membrane-bounded organelle;GO:0030133//transport vesicle;GO:0030016//myofibril;GO:0031988//membrane-bounded vesicle;GO:1903561//extracellular vesicle;GO:0005576//extracellular region;GO:0018995//host;GO:0044421//extracel…	-	GO:0006810//transport;GO:0051234//establishment of localization;GO:0051179//localization;GO:0071840//cellular component organization or biogenesis;GO:0016192//vesicle-mediated transport;GO:0006996//organelle organization;GO:0009987//cellular process;GO:0016043//cellular component organization;GO:0048193//Golgi vesicle transport
XP_005907115	0	604.973	0.001	10.3567	13.3383	8.64e-15	2.79e-12	up	KIF15	PREDICTED: kinesin-like protein KIF15 isoform X1 [Bos mutus]	-	-	-	-	-	-	-
XM_014478527	0	81.8067	0.001	10.3533	13.3378	1.31e-05	0.000353437	up	SPACA3	PREDICTED: Bos mutus sperm acrosome associated 3 (SPACA3), transcript variant X2, mRNA	-	-	-	-	GO:0044424//intracellular part;GO:0043231//intracellular membrane-bounded organelle;GO:0005773//vacuole;GO:0000323//lytic vacuole;GO:0044444//cytoplasmic part;GO:0043229//intracellular organelle;GO:0044464//cell part;GO:0030141//secretory granule;GO:0097708//intracellular vesicle;GO:0099503//secretory vesicle;GO:0043227//membrane-bounded organelle;GO:0031410//cytoplasmic vesicle;GO:0016023//cytop…	GO:0004553//hydrolase activity, hydrolyzing O-glycosyl compounds;GO:0016798//hydrolase activity, acting on glycosyl bonds;GO:0016787//hydrolase activity;GO:0003824//catalytic activity	GO:0044702//single organism reproductive process;GO:0019953//sexual reproduction;GO:0000003//reproduction;GO:0007338//single fertilization;GO:0009566//fertilization;GO:0022414//reproductive process;GO:0044699//single-organism process;GO:0051704//multi-organism process;GO:0044703//multi-organism reproductive process
XP_005905938	0	90.3667	0.001	10.29	13.329	0.000825068	0.0110489	up	CD63	PREDICTED: CD63 antigen isoform X1 [Bos mutus]	Cellular Processes	Transport and catabolism	ko04142//Lysosome	K06497	-	-	-
XP_005897384	0	119.37	0.001	10.2767	13.3271	1.16e-05	0.000317807	up	CCDC69	PREDICTED: coiled-coil domain-containing protein 69 [Bos mutus]	-	-	-	-	-	-	-
XP_005887385	0	432.603	0.001	10.2167	13.3186	1.11e-13	2.71e-11	up	RNF216	PREDICTED: E3 ubiquitin-protein ligase RNF216 isoform X1 [Bos mutus]	-	-	-	-	-	-	GO:0043903//regulation of symbiosis, encompassing mutualism through parasitism;GO:0019941//modification-dependent protein catabolic process;GO:0070647//protein modification by small protein conjugation or removal;GO:0001817//regulation of cytokine production;GO:0050792//regulation of viral process;GO:0009057//macromolecule catabolic process;GO:0080134//regulation of response to stress;GO:0008152/…
XM_005891083	0	310.583	0.001	10.1967	13.3158	1.34e-05	0.000358356	up	ANO10	PREDICTED: Bos mutus anoctamin 10 (ANO10), mRNA	-	-	-	-	GO:0044464//cell part;GO:0044425//membrane part;GO:0031224//intrinsic component of membrane;GO:0005623//cell;GO:0016020//membrane	GO:0005253//anion channel activity;GO:0015103//inorganic anion transmembrane transporter activity;GO:0022838//substrate-specific channel activity;GO:0015267//channel activity;GO:0005215//transporter activity;GO:0022891//substrate-specific transmembrane transporter activity;GO:0005254//chloride channel activity;GO:0022803//passive transmembrane transporter activity;GO:0015108//chloride transmembra…	GO:0051179//localization;GO:0006821//chloride transport;GO:0006810//transport;GO:0006820//anion transport;GO:0006812//cation transport;GO:0006811//ion transport;GO:0051234//establishment of localization;GO:0015698//inorganic anion transport
XP_005909178	0	181.223	0.001	10.1667	13.3116	9.32e-09	6.25e-07	up	G3BP2	ras GTPase-activating protein-binding protein 2 [Bos taurus]	-	-	-	-	GO:0005622//intracellular;GO:0005623//cell;GO:0044464//cell part;GO:0044424//intracellular part	GO:1901363//heterocyclic compound binding;GO:0005488//binding;GO:0003676//nucleic acid binding;GO:0097159//organic cyclic compound binding;GO:0036094//small molecule binding;GO:0003723//RNA binding;GO:0032947//protein complex scaffold;GO:0005198//structural molecule activity;GO:0005515//protein binding	GO:0051051//negative regulation of transport;GO:0090317//negative regulation of intracellular protein transport;GO:0007165//signal transduction;GO:0050794//regulation of cellular process;GO:0071702//organic substance transport;GO:1903533//regulation of protein targeting;GO:0070201//regulation of establishment of protein localization;GO:0048519//negative regulation of biological process;GO:1903828…
XP_005894759	0	391.977	0.001	10.16	13.3106	4.64e-11	5.87e-09	up	BCAR3	PREDICTED: breast cancer anti-estrogen resistance protein 3 isoform X1 [Bos mutus]	-	-	-	-	GO:0005623//cell;GO:0044464//cell part	GO:0098772//molecular function regulator	GO:0042325//regulation of phosphorylation;GO:0035556//intracellular signal transduction;GO:0009987//cellular process;GO:0031325//positive regulation of cellular metabolic process;GO:0045937//positive regulation of phosphate metabolic process;GO:0007165//signal transduction;GO:0044700//single organism signaling;GO:0051247//positive regulation of protein metabolic process;GO:0031323//regulation of …
XP_014336087	0	510.723	0.001	10.1333	13.3068	2.09e-11	2.95e-09	up	WWC2	PREDICTED: protein WWC2 [Bos mutus]	-	-	-	-	GO:0044424//intracellular part;GO:0005737//cytoplasm;GO:0005623//cell;GO:0044444//cytoplasmic part;GO:0044464//cell part;GO:0005622//intracellular	GO:0005488//binding;GO:0019899//enzyme binding;GO:0005515//protein binding	GO:0050789//regulation of biological process;GO:0023052//signaling;GO:0044700//single organism signaling;GO:0032501//multicellular organismal process;GO:0009987//cellular process;GO:0007165//signal transduction;GO:0065007//biological regulation;GO:0044707//single-multicellular organism process;GO:0040007//growth;GO:0035265//organ growth;GO:0044767//single-organism developmental process;GO:0051716…
XP_005897328	0	287.633	0.001	10.0833	13.2997	6.88e-11	8.26e-09	up	MARCH7	PREDICTED: E3 ubiquitin-protein ligase MARCH7 isoform X1 [Bos mutus]	-	-	-	-	-	GO:0005488//binding;GO:0043169//cation binding;GO:0046914//transition metal ion binding;GO:0043167//ion binding;GO:0046872//metal ion binding	GO:0022610//biological adhesion;GO:0046649//lymphocyte activation;GO:0032501//multicellular organismal process;GO:0098602//single organism cell adhesion;GO:0046651//lymphocyte proliferation;GO:0002507//tolerance induction;GO:0070486//leukocyte aggregation;GO:0016337//single organismal cell-cell adhesion;GO:0042098//T cell proliferation;GO:0044767//single-organism developmental process;GO:0032502/…
XP_005891858	0	124.863	0.001	10.08	13.2992	7.74e-07	2.98e-05	up	BRMS1L	breast cancer metastasis-suppressor 1-like protein [Homo sapiens]	-	-	-	-	-	-	-
XP_005892433	0	139.873	0.001	10.07	13.2978	1.15e-07	5.61e-06	up	SEH1L	PREDICTED: nucleoporin SEH1 [Bos mutus]	Genetic Information Processing	Translation	ko03013//RNA transport	K14299	GO:0098687//chromosomal region;GO:0043234//protein complex;GO:0043226//organelle;GO:0035859//Seh1-associated complex;GO:0005634//nucleus;GO:0000793//condensed chromosome;GO:0012505//endomembrane system;GO:0005635//nuclear envelope;GO:0044422//organelle part;GO:0005623//cell;GO:0005856//cytoskeleton;GO:0005694//chromosome;GO:0031967//organelle envelope;GO:0043231//intracellular membrane-bounded or…	GO:0019899//enzyme binding;GO:0005488//binding;GO:0005515//protein binding	GO:0008104//protein localization;GO:0031929//TOR signaling;GO:0071705//nitrogen compound transport;GO:0044700//single organism signaling;GO:0051174//regulation of phosphorus metabolic process;GO:0071702//organic substance transport;GO:0016043//cellular component organization;GO:0043933//macromolecular complex subunit organization;GO:0043207//response to external biotic stimulus;GO:0044763//single…
XP_005889169	0	152.78	0.001	10.0667	13.2973	3.96e-08	2.17e-06	up	HERPUD2	homocysteine-responsive endoplasmic reticulum-resident ubiquitin-like domain member 2 protein [Bos taurus]	-	-	-	-	GO:0016020//membrane;GO:0044425//membrane part;GO:0031224//intrinsic component of membrane	-	GO:0019953//sexual reproduction;GO:0032504//multicellular organism reproduction;GO:0022414//reproductive process;GO:0051704//multi-organism process;GO:0048609//multicellular organismal reproductive process;GO:0044699//single-organism process;GO:0044702//single organism reproductive process;GO:0044703//multi-organism reproductive process;GO:0007276//gamete generation;GO:0048232//male gamete genera…
XM_005887894	0	152.333	0.001	10.0433	13.294	3.26e-07	1.39e-05	up	SUN5	PREDICTED: Bos mutus Sad1 and UNC84 domain containing 5 (SUN5), mRNA	-	-	-	-	GO:0044425//membrane part;GO:0031224//intrinsic component of membrane;GO:0016020//membrane	-	-
XP_014332266	0	291.247	0.001	10.0433	13.294	2.81e-08	1.6e-06	up	SNRK	PREDICTED: SNF-related serine/threonine-protein kinase [Bos mutus]	-	-	-	-	-	-	-
XP_014332813	0	445.13	0.001	10.02	13.2906	1.88e-14	5.56e-12	up	GTF2I	PREDICTED: general transcription factor II-I isoform X1 [Bos taurus]	Environmental Information Processing;Genetic Information Processing	Transcription;Signal transduction	ko04022//cGMP - PKG signaling pathway;ko03022//Basal transcription factors	K03121	-	-	-
XP_005910680	0	169.397	0.001	10	13.2877	1.39e-08	8.8e-07	up	TTLL1	probable tubulin polyglutamylase TTLL1 [Bos taurus]	-	-	-	-	GO:0043226//organelle;GO:0044424//intracellular part;GO:0005622//intracellular;GO:0043232//intracellular non-membrane-bounded organelle;GO:0044464//cell part;GO:0015630//microtubule cytoskeleton;GO:0005856//cytoskeleton;GO:0043229//intracellular organelle;GO:0043228//non-membrane-bounded organelle;GO:0005623//cell	GO:0032550//purine ribonucleoside binding;GO:0032549//ribonucleoside binding;GO:0097159//organic cyclic compound binding;GO:1901363//heterocyclic compound binding;GO:0001882//nucleoside binding;GO:0005488//binding;GO:0097367//carbohydrate derivative binding;GO:0036094//small molecule binding;GO:0001883//purine nucleoside binding;GO:0003824//catalytic activity	GO:0030030//cell projection organization;GO:0032990//cell part morphogenesis;GO:0071704//organic substance metabolic process;GO:0007017//microtubule-based process;GO:0044238//primary metabolic process;GO:0044763//single-organism cellular process;GO:0044267//cellular protein metabolic process;GO:0016043//cellular component organization;GO:0044237//cellular metabolic process;GO:0007010//cytoskeleto…
XP_005889296	0	118.713	0.001	9.99	13.2863	1.86e-07	8.57e-06	up	MAPRE2	microtubule-associated protein RP/EB family member 2 [Bos taurus]	-	-	-	-	GO:0044446//intracellular organelle part;GO:0043229//intracellular organelle;GO:0099512//supramolecular fiber;GO:0043232//intracellular non-membrane-bounded organelle;GO:0005623//cell;GO:0015630//microtubule cytoskeleton;GO:0099513//polymeric cytoskeletal fiber;GO:0099081//supramolecular polymer;GO:0005622//intracellular;GO:0043226//organelle;GO:0044464//cell part;GO:0099080//supramolecular compl…	GO:0008092//cytoskeletal protein binding;GO:0005488//binding;GO:0005515//protein binding;GO:0015631//tubulin binding	GO:0044699//single-organism process;GO:0007049//cell cycle;GO:0044763//single-organism cellular process;GO:0009987//cellular process;GO:0000278//mitotic cell cycle
XP_005901451	0	196.4	0.001	9.97333	13.2839	5.54e-09	3.95e-07	up	LOC102286495	PREDICTED: LOW QUALITY PROTEIN: mothers against decapentaplegic homolog 2 [Bos mutus]	Cellular Processes;Environmental Information Processing	Cellular commiunity;Signal transduction;Transport and catabolism;Cell growth and death	ko04144//Endocytosis;ko04390//Hippo signaling pathway;ko04550//Signaling pathways regulating pluripotency of stem cells;ko04068//FoxO signaling pathway;ko04110//Cell cycle;ko04350//TGF-beta signaling pathway;ko04520//Adherens junction	K04500	GO:0044464//cell part;GO:0005623//cell;GO:0043227//membrane-bounded organelle;GO:0043228//non-membrane-bounded organelle;GO:0044422//organelle part;GO:0044428//nuclear part;GO:0031974//membrane-enclosed lumen;GO:0090575//RNA polymerase II transcription factor complex;GO:0005737//cytoplasm;GO:0005694//chromosome;GO:0044427//chromosomal part;GO:0043231//intracellular membrane-bounded organelle;GO:0…	GO:0000975//regulatory region DNA binding;GO:0043169//cation binding;GO:0003690//double-stranded DNA binding;GO:0008134//transcription factor binding;GO:0005126//cytokine receptor binding;GO:0004871//signal transducer activity;GO:0000976//transcription regulatory region sequence-specific DNA binding;GO:0005160//transforming growth factor beta receptor binding;GO:0003676//nucleic acid binding;GO:1…	GO:0009792//embryo development ending in birth or egg hatching;GO:0016043//cellular component organization;GO:0009653//anatomical structure morphogenesis;GO:0010033//response to organic substance;GO:1901700//response to oxygen-containing compound;GO:0048705//skeletal system morphogenesis;GO:0051246//regulation of protein metabolic process;GO:0048704//embryonic skeletal system morphogenesis;GO:004…
XP_005895966	0	106.863	0.001	9.97	13.2834	0.00047852	0.00722927	up	WASF2	PREDICTED: wiskott-Aldrich syndrome protein family member 2 isoform X2 [Bos mutus]	Organismal Systems;Cellular Processes	Immune system;Cellular commiunity;Cell motility	ko04810//Regulation of actin cytoskeleton;ko04666//Fc gamma R-mediated phagocytosis;ko04520//Adherens junction	K05748	GO:0005576//extracellular region;GO:0012505//endomembrane system;GO:0043226//organelle;GO:0031252//cell leading edge;GO:0030054//cell junction;GO:0005768//endosome;GO:0043232//intracellular non-membrane-bounded organelle;GO:0044464//cell part;GO:0043230//extracellular organelle;GO:0005856//cytoskeleton;GO:0043227//membrane-bounded organelle;GO:0043228//non-membrane-bounded organelle;GO:0031982//v…	GO:0005515//protein binding;GO:0005488//binding;GO:0008092//cytoskeletal protein binding	GO:0009653//anatomical structure morphogenesis;GO:0051494//negative regulation of cytoskeleton organization;GO:0050896//response to stimulus;GO:0048583//regulation of response to stimulus;GO:0048646//anatomical structure formation involved in morphogenesis;GO:0048858//cell projection morphogenesis;GO:0002682//regulation of immune system process;GO:0023052//signaling;GO:0030097//hemopoiesis;GO:004…
XP_005906518	0	122.597	0.001	9.96333	13.2824	1.7e-06	5.99e-05	up	CREM	PREDICTED: cAMP-responsive element modulator isoform X2 [Bos mutus]	Organismal Systems	Circulatory system	ko04261//Adrenergic signaling in cardiomyocytes	K09052	GO:0044464//cell part;GO:0043231//intracellular membrane-bounded organelle;GO:0043227//membrane-bounded organelle;GO:0005623//cell;GO:0043229//intracellular organelle;GO:0005622//intracellular;GO:0032991//macromolecular complex;GO:0043234//protein complex;GO:0044424//intracellular part;GO:0043226//organelle	GO:0003677//DNA binding;GO:0003690//double-stranded DNA binding;GO:0003676//nucleic acid binding;GO:0000975//regulatory region DNA binding;GO:0001067//regulatory region nucleic acid binding;GO:1901363//heterocyclic compound binding;GO:0043565//sequence-specific DNA binding;GO:0000976//transcription regulatory region sequence-specific DNA binding;GO:0005488//binding;GO:1990837//sequence-specific d…	GO:0071704//organic substance metabolic process;GO:0048609//multicellular organismal reproductive process;GO:1901576//organic substance biosynthetic process;GO:0006664//glycolipid metabolic process;GO:0032501//multicellular organismal process;GO:0006643//membrane lipid metabolic process;GO:0018130//heterocycle biosynthetic process;GO:1903509//liposaccharide metabolic process;GO:0043170//macromole…
XP_005899041	0	543.627	0.001	9.95667	13.2814	0.000139723	0.00262571	up	LOC102285924	PREDICTED: collagen alpha-1(XVIII) chain-like [Bos mutus]	Organismal Systems	Digestive system	ko04974//Protein digestion and absorption	K06823	GO:0044421//extracellular region part;GO:0005576//extracellular region	-	GO:0009987//cellular process;GO:0044763//single-organism cellular process;GO:0044699//single-organism process
XP_005898807	0	122.087	0.001	9.88	13.2703	4.04e-06	0.000126235	up	ISG20L2	interferon-stimulated 20 kDa exonuclease-like 2 [Bos taurus]	-	-	-	-	GO:0043226//organelle;GO:0070013//intracellular organelle lumen;GO:0043233//organelle lumen;GO:0005623//cell;GO:0043229//intracellular organelle;GO:0005634//nucleus;GO:0044428//nuclear part;GO:0031974//membrane-enclosed lumen;GO:0044424//intracellular part;GO:0043227//membrane-bounded organelle;GO:0005622//intracellular;GO:0031981//nuclear lumen;GO:0044446//intracellular organelle part;GO:0044422…	GO:1901363//heterocyclic compound binding;GO:0003824//catalytic activity;GO:0003676//nucleic acid binding;GO:0016787//hydrolase activity;GO:0003723//RNA binding;GO:0005488//binding;GO:0097159//organic cyclic compound binding;GO:0016788//hydrolase activity, acting on ester bonds	GO:0071704//organic substance metabolic process;GO:0006139//nucleobase-containing compound metabolic process;GO:0022613//ribonucleoprotein complex biogenesis;GO:0034641//cellular nitrogen compound metabolic process;GO:0071840//cellular component organization or biogenesis;GO:0006807//nitrogen compound metabolic process;GO:0090304//nucleic acid metabolic process;GO:0006725//cellular aromatic compo…
XP_005907237	0	114.637	0.001	9.88	13.2703	2.81e-07	1.22e-05	up	WDR45B	PREDICTED: WD repeat domain phosphoinositide-interacting protein 3 isoform X4 [Ovis aries]	-	-	-	-	-	-	-
[truncated: 11,311 more rows]
