# Supplementary material for: Gene expression dynamics during the gonocyte to spermatogonia transition and spermatogenesis in the domestic yak
Source: J Anim Sci Biotechnol. 2019 Jul 12;10:64. doi: 10.1186/s40104-019-0360-7 (PMC6624888; doi:10.1186/s40104-019-0360-7)
Supplement: Supplementary file 2 — Table S2. Comparative analysis of transcriptomes between 5 and 8 months old yak testes. (XLSX 989 kb) [file 40104_2019_360_MOESM2_ESM.xlsx]

## Sheet: 40104_2019_360_MOESM2_ESM
id	Yspg_count	Yspc_count	Yspg_fpkm	Yspc_fpkm	log2(FC)	Pvalue	FDR	significant	Symbol	Description	KEGG_A_class	KEGG_B_class	Pathway	K_ID	GO Component	GO Function	GO Process
XP_005893446	0	505.45	0.001	226.32	17.788	0.000377744	0.105102	no	LOC102286562	histone H3.3C-like [Bos taurus]	-	-	-	-	GO:0043228//non-membrane-bounded organelle;GO:0043232//intracellular non-membrane-bounded organelle;GO:0043227//membrane-bounded organelle;GO:0043226//organelle;GO:0005623//cell;GO:0043231//intracellular membrane-bounded organelle;GO:0005622//intracellular;GO:0044464//cell part;GO:0043229//intracellular organelle;GO:0044424//intracellular part	GO:0046983//protein dimerization activity;GO:0005488//binding;GO:0005515//protein binding;GO:0003676//nucleic acid binding;GO:1901363//heterocyclic compound binding;GO:0097159//organic cyclic compound binding	-
XP_014331757	0	749.693	0.001	85.6933	16.3869	0.000218402	0.0796264	no	RPS2	PREDICTED: 40S ribosomal protein S2 [Bos mutus]	Genetic Information Processing	Translation	ko03010//Ribosome	K02981	-	-	-
XP_014334614	0	2711.4	0.001	77.0033	16.2326	8.54e-08	0.00041043	up	UBC	PREDICTED: polyubiquitin-C isoform X1 [Bos mutus]	Organismal Systems	Endocrine system	ko03320//PPAR signaling pathway	K08770	GO:0005634//nucleus;GO:0044422//organelle part;GO:0031988//membrane-bounded vesicle;GO:0043226//organelle;GO:0044446//intracellular organelle part;GO:0000323//lytic vacuole;GO:0005773//vacuole;GO:0044428//nuclear part;GO:0044424//intracellular part;GO:0031982//vesicle;GO:0031410//cytoplasmic vesicle;GO:0098805//whole membrane;GO:0005622//intracellular;GO:0043229//intracellular organelle;GO:001602…	GO:0097159//organic cyclic compound binding;GO:1901363//heterocyclic compound binding;GO:0005515//protein binding;GO:0003676//nucleic acid binding;GO:0019899//enzyme binding;GO:0003723//RNA binding;GO:0005488//binding	GO:0044238//primary metabolic process;GO:0034645//cellular macromolecule biosynthetic process;GO:0051704//multi-organism process;GO:0090304//nucleic acid metabolic process;GO:0065008//regulation of biological quality;GO:0007178//transmembrane receptor protein serine/threonine kinase signaling pathway;GO:0031401//positive regulation of protein modification process;GO:0032268//regulation of cellula…
XP_005899098	0	26.3733	0.001	73.3333	16.1622	0.0258056	0.861166	no	SPINK2	PREDICTED: serine protease inhibitor Kazal-type 2 [Bos mutus]	-	-	-	-	-	-	-
XP_014338644	0	93.3733	0.001	69.2533	16.0796	0.00497449	0.434053	no	LOC106701587	PREDICTED: spermatid nuclear transition protein 4-like [Camelus ferus]	-	-	-	-	-	-	-
XP_014332481	0	68.14	0.001	63.4467	15.9533	0.00110676	0.200632	no	LOC106700666	PREDICTED: eukaryotic translation initiation factor 3 subunit E-like [Physeter catodon]	Genetic Information Processing	Translation	ko03013//RNA transport	K03250	-	-	-
XP_005889059	0	138.97	0.001	61.69	15.9127	0.00253991	0.312194	no	LOC102269698	PREDICTED: probable cystatin-15-like [Bos mutus]	-	-	-	-	-	GO:0098772//molecular function regulator;GO:0030234//enzyme regulator activity;GO:0004857//enzyme inhibitor activity	GO:0044092//negative regulation of molecular function;GO:0050794//regulation of cellular process;GO:0048523//negative regulation of cellular process;GO:0052547//regulation of peptidase activity;GO:0009892//negative regulation of metabolic process;GO:0045861//negative regulation of proteolysis;GO:0050790//regulation of catalytic activity;GO:0060255//regulation of macromolecule metabolic process;GO…
XP_014336534	0	171.247	0.001	60.1733	15.8768	0.00194161	0.279563	no	LOC102266881	PREDICTED: 60S ribosomal protein L8 [Camelus ferus]	Genetic Information Processing	Translation	ko03010//Ribosome	K02938	-	-	-
Unigene035660	0	5.33333	0.001	54.3233	15.7293	0.0382129	0.987353	no	-	-	-	-	-	-	-	-	-
Unigene046417	0	9	0.001	39.4067	15.2662	0.0249009	0.851091	no	Unigene046417	PREDICTED: collagen alpha-1(III) chain-like isoform X3 [Ovis aries musimon]	-	-	-	-	-	-	-
XP_005889529	0	278.393	0.001	29.3467	14.8409	0.000927657	0.180296	no	CFAP36	cilia- and flagella-associated protein 36 [Bos taurus]	-	-	-	-	GO:0005622//intracellular;GO:0044424//intracellular part;GO:0005623//cell;GO:0044464//cell part	-	-
Unigene007155	0	198.667	0.001	28.33	14.79	0.00157047	0.250931	no	-	-	-	-	-	-	-	-	-
XM_005896629	0	690.29	0.001	25.8967	14.6605	4.71e-10	1.25e-05	up	GMPS	PREDICTED: Bos mutus guanine monophosphate synthase (GMPS), mRNA	Metabolism	Xenobiotics biodegradation and metabolism;Nucleotide metabolism	ko00230//Purine metabolism;ko00983//Drug metabolism - other enzymes	K01951	-	-	-
XM_005901323	0	69.0133	0.001	25.09	14.6148	0.0076278	0.522322	no	PAM16	PREDICTED: Bos mutus presequence translocase-associated motor 16 homolog (S. cerevisiae) (PAM16), transcript variant X3, mRNA	-	-	-	-	GO:0044446//intracellular organelle part;GO:0031967//organelle envelope;GO:0005622//intracellular;GO:0005740//mitochondrial envelope;GO:0043227//membrane-bounded organelle;GO:0044429//mitochondrial part;GO:0044444//cytoplasmic part;GO:0044464//cell part;GO:0019866//organelle inner membrane;GO:0005737//cytoplasm;GO:0031090//organelle membrane;GO:0044424//intracellular part;GO:0031975//envelope;GO:…	-	GO:0044699//single-organism process;GO:0071840//cellular component organization or biogenesis;GO:0065009//regulation of molecular function;GO:0015031//protein transport;GO:0051649//establishment of localization in cell;GO:0033365//protein localization to organelle;GO:0065007//biological regulation;GO:0051336//regulation of hydrolase activity;GO:0046907//intracellular transport;GO:0006886//intrace…
XM_005898732	0	543.84	0.001	24.32	14.5699	0.000341571	0.0981368	no	CCT3	PREDICTED: Bos mutus chaperonin containing TCP1, subunit 3 (gamma) (CCT3), transcript variant X3, mRNA	-	-	-	-	GO:0043229//intracellular organelle;GO:0005622//intracellular;GO:0044421//extracellular region part;GO:0005623//cell;GO:0043230//extracellular organelle;GO:0043234//protein complex;GO:0005576//extracellular region;GO:0043232//intracellular non-membrane-bounded organelle;GO:0016020//membrane;GO:0043227//membrane-bounded organelle;GO:0044424//intracellular part;GO:0005856//cytoskeleton;GO:1903561//…	GO:0032549//ribonucleoside binding;GO:1901363//heterocyclic compound binding;GO:0032550//purine ribonucleoside binding;GO:0097159//organic cyclic compound binding;GO:0005488//binding;GO:0001883//purine nucleoside binding;GO:0001882//nucleoside binding;GO:0003676//nucleic acid binding;GO:0005515//protein binding;GO:0003723//RNA binding;GO:0097367//carbohydrate derivative binding;GO:0036094//small …	GO:0022414//reproductive process;GO:0051704//multi-organism process;GO:0006461//protein complex assembly;GO:0044702//single organism reproductive process;GO:0044699//single-organism process;GO:0070271//protein complex biogenesis;GO:0008037//cell recognition;GO:0007338//single fertilization;GO:0022607//cellular component assembly;GO:0016043//cellular component organization;GO:0006810//transport;GO…
XP_005899689	0	22.2	0.001	21.8733	14.4169	0.0121359	0.657342	no	LOC102274101	ubiquitin-conjugating enzyme E2 variant 1 isoform g [Homo sapiens]	-	-	-	-	-	-	-
XP_005902482	0	116.18	0.001	20.7167	14.3385	0.00333531	0.354437	no	RPS5	40S ribosomal protein S5 [Homo sapiens]	Genetic Information Processing	Translation	ko03010//Ribosome	K02989	-	-	-
XP_005890004	0	27.0867	0.001	20.69	14.3366	0.0250161	0.851091	no	TMEM256	PREDICTED: transmembrane protein 256 [Bos mutus]	-	-	-	-	GO:0031224//intrinsic component of membrane;GO:0044425//membrane part;GO:0016020//membrane	-	-
Unigene002333	0	188.333	0.001	20.6867	14.3364	0.00169425	0.258116	no	Unigene002333	PREDICTED: chlorophyll a-b binding protein of LHCII type 1, partial [Rhinopithecus roxellana]	-	-	-	-	-	-	-
Unigene033015	0	18.6667	0.001	20.66	14.3346	0.00414372	0.398287	no	Unigene033015	PREDICTED: atherin-like [Ovis aries musimon]	-	-	-	-	-	-	-
XM_005889298	0	204.623	0.001	20.3933	14.3158	0.00149477	0.240892	no	SPACA1	PREDICTED: Bos mutus sperm acrosome associated 1 (SPACA1), transcript variant X1, mRNA	-	-	-	-	-	-	-
XP_005889222	0	31.01	0.001	20.0533	14.2916	0.0211999	0.803977	no	RPS20	PREDICTED: 40S ribosomal protein S20 [Bos mutus]	Genetic Information Processing	Translation	ko03010//Ribosome	K02969	GO:0015935//small ribosomal subunit;GO:0005737//cytoplasm;GO:0043232//intracellular non-membrane-bounded organelle;GO:0043227//membrane-bounded organelle;GO:0005622//intracellular;GO:0043233//organelle lumen;GO:0005623//cell;GO:0044391//ribosomal subunit;GO:0043226//organelle;GO:0032991//macromolecular complex;GO:1903561//extracellular vesicle;GO:0030529//intracellular ribonucleoprotein complex;G…	GO:0003676//nucleic acid binding;GO:0005198//structural molecule activity;GO:1901363//heterocyclic compound binding;GO:0003723//RNA binding;GO:0005488//binding;GO:0097159//organic cyclic compound binding	GO:0016043//cellular component organization;GO:0006139//nucleobase-containing compound metabolic process;GO:1901361//organic cyclic compound catabolic process;GO:0045184//establishment of protein localization;GO:0016071//mRNA metabolic process;GO:0044267//cellular protein metabolic process;GO:0006810//transport;GO:0006401//RNA catabolic process;GO:0006412//translation;GO:0006605//protein targetin…
XP_005908169	0	73.8733	0.001	18.89	14.2053	0.00690811	0.502402	no	CNBP	cellular nucleic acid-binding protein isoform 3 [Homo sapiens]	-	-	-	-	GO:0043231//intracellular membrane-bounded organelle;GO:0044444//cytoplasmic part;GO:0005623//cell;GO:0005737//cytoplasm;GO:0043229//intracellular organelle;GO:0044464//cell part;GO:0044424//intracellular part;GO:0005622//intracellular;GO:0043227//membrane-bounded organelle;GO:0043226//organelle	GO:0043169//cation binding;GO:0043167//ion binding;GO:0005488//binding;GO:1901363//heterocyclic compound binding;GO:0097159//organic cyclic compound binding;GO:0003676//nucleic acid binding;GO:0003723//RNA binding;GO:0001071//nucleic acid binding transcription factor activity;GO:0003677//DNA binding;GO:0046872//metal ion binding;GO:0046914//transition metal ion binding	GO:1902652//secondary alcohol metabolic process;GO:0046483//heterocycle metabolic process;GO:0006139//nucleobase-containing compound metabolic process;GO:0016070//RNA metabolic process;GO:0043170//macromolecule metabolic process;GO:0034645//cellular macromolecule biosynthetic process;GO:0044237//cellular metabolic process;GO:0016125//sterol metabolic process;GO:0097659//nucleic acid-templated tra…
Unigene050775	0	13.3333	0.001	18.42	14.169	0.00316828	0.348215	no	Unigene050775	PREDICTED: LOW QUALITY PROTEIN: motor neuron and pancreas homeobox 1 [Lipotes vexillifer]	-	-	-	-	-	-	-
XP_014336226	0	46.0933	0.001	18.3	14.1596	0.0132951	0.677437	no	RBM4B	RNA-binding protein 4B isoform 2 [Homo sapiens]	-	-	-	-	GO:0043229//intracellular organelle;GO:0044444//cytoplasmic part;GO:0043233//organelle lumen;GO:0031974//membrane-enclosed lumen;GO:0031981//nuclear lumen;GO:0005654//nucleoplasm;GO:0005737//cytoplasm;GO:0043231//intracellular membrane-bounded organelle;GO:0044428//nuclear part;GO:0043232//intracellular non-membrane-bounded organelle;GO:0044451//nucleoplasm part;GO:0044446//intracellular organell…	GO:0046872//metal ion binding;GO:0097157//pre-mRNA intronic binding;GO:0043167//ion binding;GO:1901363//heterocyclic compound binding;GO:0003723//RNA binding;GO:0036094//small molecule binding;GO:0003676//nucleic acid binding;GO:0043169//cation binding;GO:0044822//poly(A) RNA binding;GO:0005488//binding;GO:0097159//organic cyclic compound binding;GO:0036002//pre-mRNA binding;GO:0046914//transitio…	GO:1901566//organonitrogen compound biosynthetic process;GO:0016441//posttranscriptional gene silencing;GO:0042692//muscle cell differentiation;GO:0043170//macromolecule metabolic process;GO:0032940//secretion by cell;GO:0007267//cell-cell signaling;GO:0019538//protein metabolic process;GO:0044710//single-organism metabolic process;GO:0000165//MAPK cascade;GO:1901700//response to oxygen-containin…
XP_005888171	0	73.0733	0.001	17.0733	14.0595	0.00704	0.502932	no	NDUFB8	NADH dehydrogenase [ubiquinone] 1 beta subcomplex subunit 8, mitochondrial precursor [Bos taurus]	Metabolism	Energy metabolism	ko00190//Oxidative phosphorylation	K03964	GO:0043231//intracellular membrane-bounded organelle;GO:0031224//intrinsic component of membrane;GO:0005739//mitochondrion;GO:0044446//intracellular organelle part;GO:0016020//membrane;GO:0044422//organelle part;GO:0044464//cell part;GO:0019866//organelle inner membrane;GO:0031967//organelle envelope;GO:0043227//membrane-bounded organelle;GO:0005623//cell;GO:0043229//intracellular organelle;GO:00…	GO:0016655//oxidoreductase activity, acting on NAD(P)H, quinone or similar compound as acceptor;GO:0016651//oxidoreductase activity, acting on NAD(P)H;GO:0016491//oxidoreductase activity;GO:0050136//NADH dehydrogenase (quinone) activity;GO:0003824//catalytic activity;GO:0003954//NADH dehydrogenase activity	GO:0022900//electron transport chain;GO:0022904//respiratory electron transport chain;GO:0044763//single-organism cellular process;GO:0044237//cellular metabolic process;GO:0009987//cellular process;GO:0045333//cellular respiration;GO:0015980//energy derivation by oxidation of organic compounds;GO:0006091//generation of precursor metabolites and energy;GO:0008152//metabolic process;GO:0044710//si…
XP_005893375	0	17.09	0.001	17.0367	14.0564	0.0423116	1	no	LOC102265410	thioredoxin domain-containing protein 8 [Bos taurus]	-	-	-	-	-	-	-
XM_014477737	0	41.4433	0.001	16.91	14.0456	0.0152347	0.71871	no	LOC102282170	PREDICTED: Bos mutus cytochrome b-c1 complex subunit 6, mitochondrial (LOC102282170), transcript variant X5, mRNA	Organismal Systems;Metabolism	Circulatory system;Energy metabolism	ko00190//Oxidative phosphorylation;ko04260//Cardiac muscle contraction	K00416	GO:0044429//mitochondrial part;GO:0044422//organelle part;GO:0019866//organelle inner membrane;GO:0005623//cell;GO:0031966//mitochondrial membrane;GO:0043226//organelle;GO:0005743//mitochondrial inner membrane;GO:0043227//membrane-bounded organelle;GO:0044425//membrane part;GO:0043231//intracellular membrane-bounded organelle;GO:0005740//mitochondrial envelope;GO:0044464//cell part;GO:0005739//mi…	GO:0015075//ion transmembrane transporter activity;GO:0015078//hydrogen ion transmembrane transporter activity;GO:0008324//cation transmembrane transporter activity;GO:0015077//monovalent inorganic cation transmembrane transporter activity;GO:0022890//inorganic cation transmembrane transporter activity;GO:0005215//transporter activity;GO:0022892//substrate-specific transporter activity;GO:0022891…	GO:0044699//single-organism process;GO:0006091//generation of precursor metabolites and energy;GO:0022904//respiratory electron transport chain;GO:0006810//transport;GO:0006818//hydrogen transport;GO:0045333//cellular respiration;GO:0044237//cellular metabolic process;GO:0051234//establishment of localization;GO:0022900//electron transport chain;GO:0044763//single-organism cellular process;GO:000…
XM_005894065	0	33.8	0.001	16.54	14.0137	0.0192065	0.781641	no	FAU	PREDICTED: Bos mutus Finkel-Biskis-Reilly murine sarcoma virus (FBR-MuSV) ubiquitously expressed (FAU), transcript variant X3, mRNA	Genetic Information Processing	Translation	ko03010//Ribosome	K02983	-	-	-
XM_005893118	0	225.003	0.001	16.33	13.9952	0.00130601	0.220391	no	PDAP1	PREDICTED: Bos mutus PDGFA associated protein 1 (PDAP1), transcript variant X2, mRNA	-	-	-	-	-	-	-
XP_005908846	0	89.0267	0.001	15	13.8727	3.05e-06	0.00593172	up	NTMT1	PREDICTED: N-terminal Xaa-Pro-Lys N-methyltransferase 1 isoform X1 [Bos taurus]	-	-	-	-	-	-	-
XP_014338062	0	89.0267	0.001	15	13.8727	3.04e-06	0.00593172	up	NTMT1	PREDICTED: N-terminal Xaa-Pro-Lys N-methyltransferase 1 isoform X1 [Bos taurus]	-	-	-	-	-	-	-
Unigene010443	0	5.33333	0.001	14.9433	13.8672	0.024093	0.842206	no	Unigene010443	PREDICTED: vegetative cell wall protein gp1-like [Ficedula albicollis]	-	-	-	-	-	-	-
XP_005902184	0	153.35	0.001	14.76	13.8494	0.00231175	0.304765	no	PCBP2	poly(rC)-binding protein 2 isoform f [Homo sapiens]	-	-	-	-	GO:0031981//nuclear lumen;GO:0043229//intracellular organelle;GO:0043226//organelle;GO:0005912//adherens junction;GO:0005623//cell;GO:0044464//cell part;GO:0070161//anchoring junction;GO:0044428//nuclear part;GO:0005622//intracellular;GO:0044421//extracellular region part;GO:0044446//intracellular organelle part;GO:0030054//cell junction;GO:0005924//cell-substrate adherens junction;GO:0030055//ce…	GO:0003723//RNA binding;GO:0005515//protein binding;GO:0097159//organic cyclic compound binding;GO:0044389//ubiquitin-like protein ligase binding;GO:0019899//enzyme binding;GO:0003676//nucleic acid binding;GO:1901363//heterocyclic compound binding;GO:0005488//binding	GO:0044265//cellular macromolecule catabolic process;GO:0044257//cellular protein catabolic process;GO:0044249//cellular biosynthetic process;GO:0044248//cellular catabolic process;GO:0009057//macromolecule catabolic process;GO:0019079//viral genome replication;GO:1901576//organic substance biosynthetic process;GO:0002682//regulation of immune system process;GO:0019941//modification-dependent pro…
XP_005904273	0	161.043	0.001	13.9233	13.7652	9.75e-05	0.049069	up	LOC102286220	PREDICTED: BOLA class I histocompatibility antigen, alpha chain BL3-7-like, partial [Bos mutus]	Environmental Information Processing;Organismal Systems;Cellular Processes	Immune system;Signaling molecules and interaction;Transport and catabolism	ko04144//Endocytosis;ko04145//Phagosome;ko04514//Cell adhesion molecules (CAMs);ko04650//Natural killer cell mediated cytotoxicity;ko04612//Antigen processing and presentation	K06751	-	-	-
XP_005887072	0	97.4433	0.001	13.55	13.726	0.000296092	0.0916921	no	YWHAZ	14-3-3 protein zeta/delta [Homo sapiens]	Cellular Processes;Environmental Information Processing	Signal transduction;Cell growth and death	ko04151//PI3K-Akt signaling pathway;ko04390//Hippo signaling pathway;ko04114//Oocyte meiosis;ko04110//Cell cycle	K16197	GO:0044422//organelle part;GO:0005912//adherens junction;GO:0045202//synapse;GO:0044424//intracellular part;GO:0031982//vesicle;GO:0032991//macromolecular complex;GO:0005737//cytoplasm;GO:0060076//excitatory synapse;GO:0097708//intracellular vesicle;GO:0070013//intracellular organelle lumen;GO:0031410//cytoplasmic vesicle;GO:0048770//pigment granule;GO:0044421//extracellular region part;GO:007016…	GO:0003723//RNA binding;GO:0019899//enzyme binding;GO:0019900//kinase binding;GO:0005488//binding;GO:0016772//transferase activity, transferring phosphorus-containing groups;GO:0005515//protein binding;GO:0097159//organic cyclic compound binding;GO:0044389//ubiquitin-like protein ligase binding;GO:0003824//catalytic activity;GO:1901363//heterocyclic compound binding;GO:0016491//oxidoreductase act…	GO:0070727//cellular macromolecule localization;GO:0008637//apoptotic mitochondrial changes;GO:0035794//positive regulation of mitochondrial membrane permeability;GO:0006886//intracellular protein transport;GO:0051205//protein insertion into membrane;GO:0060255//regulation of macromolecule metabolic process;GO:0044763//single-organism cellular process;GO:1902580//single-organism cellular localiza…
XP_005895770	0	108.82	0.001	13.4833	13.7189	0.00021042	0.0781861	no	MAPRE3	microtubule-associated protein RP/EB family member 3 [Bos taurus]	-	-	-	-	GO:0099081//supramolecular polymer;GO:0043232//intracellular non-membrane-bounded organelle;GO:0043228//non-membrane-bounded organelle;GO:0005737//cytoplasm;GO:0099512//supramolecular fiber;GO:0044422//organelle part;GO:0044430//cytoskeletal part;GO:0005856//cytoskeleton;GO:0044446//intracellular organelle part;GO:0015630//microtubule cytoskeleton;GO:0005874//microtubule;GO:0044464//cell part;GO:…	GO:0005515//protein binding;GO:0005488//binding;GO:0008092//cytoskeletal protein binding;GO:0015631//tubulin binding	GO:1904029//regulation of cyclin-dependent protein kinase activity;GO:0060255//regulation of macromolecule metabolic process;GO:0006725//cellular aromatic compound metabolic process;GO:0051338//regulation of transferase activity;GO:0008152//metabolic process;GO:0097659//nucleic acid-templated transcription;GO:1901360//organic cyclic compound metabolic process;GO:0010467//gene expression;GO:004469…
XP_005889077	0	41.07	0.001	13.4633	13.7167	0.0153612	0.720825	no	SCP2D1	PREDICTED: SCP2 sterol-binding domain-containing protein 1 [Bos mutus]	-	-	-	-	-	-	-
XP_014333117	0	85.52	0.001	12.9367	13.6592	8.1e-06	0.0104488	up	SNRPB	small nuclear ribonucleoprotein-associated protein B' [Bos taurus]	Genetic Information Processing	Transcription	ko03040//Spliceosome	K11086	-	-	-
Unigene011469	0	8	0.001	12.5567	13.6162	0.0220645	0.823069	no	-	-	-	-	-	-	-	-	-
Unigene019575	0	13.3333	0.001	12.1133	13.5643	0.00330493	0.354285	no	Unigene019575	PREDICTED: E3 ubiquitin-protein ligase AMFR [Chlorocebus sabaeus]	-	-	-	-	GO:0031974//membrane-enclosed lumen;GO:0044422//organelle part;GO:0005622//intracellular;GO:0043227//membrane-bounded organelle;GO:0070013//intracellular organelle lumen;GO:0044424//intracellular part;GO:0032991//macromolecular complex;GO:0043233//organelle lumen;GO:0005654//nucleoplasm;GO:0016020//membrane;GO:0044464//cell part;GO:0043231//intracellular membrane-bounded organelle;GO:0005623//cel…	GO:0043169//cation binding;GO:1901363//heterocyclic compound binding;GO:0003676//nucleic acid binding;GO:0005488//binding;GO:0043167//ion binding;GO:0097159//organic cyclic compound binding	GO:0090304//nucleic acid metabolic process;GO:0009059//macromolecule biosynthetic process;GO:0032774//RNA biosynthetic process;GO:1901362//organic cyclic compound biosynthetic process;GO:0044238//primary metabolic process;GO:0034654//nucleobase-containing compound biosynthetic process;GO:0016070//RNA metabolic process;GO:0044699//single-organism process;GO:0044260//cellular macromolecule metaboli…
XP_005895965	0	211.16	0.001	11.8833	13.5367	2.86e-05	0.0215774	up	WASF2	Wiskott-Aldrich syndrome protein family member 2, partial [Bos mutus]	Organismal Systems;Cellular Processes	Immune system;Cellular commiunity;Cell motility	ko04810//Regulation of actin cytoskeleton;ko04666//Fc gamma R-mediated phagocytosis;ko04520//Adherens junction	K05748	GO:1903561//extracellular vesicle;GO:0043234//protein complex;GO:0043231//intracellular membrane-bounded organelle;GO:0043230//extracellular organelle;GO:0043232//intracellular non-membrane-bounded organelle;GO:0005737//cytoplasm;GO:0005773//vacuole;GO:0032991//macromolecular complex;GO:0005623//cell;GO:0031252//cell leading edge;GO:0044444//cytoplasmic part;GO:0043228//non-membrane-bounded organ…	GO:0008092//cytoskeletal protein binding;GO:0005488//binding;GO:0005515//protein binding	GO:0032232//negative regulation of actin filament bundle assembly;GO:0010591//regulation of lamellipodium assembly;GO:0030154//cell differentiation;GO:0048856//anatomical structure development;GO:0048513//animal organ development;GO:0044767//single-organism developmental process;GO:0023052//signaling;GO:0050789//regulation of biological process;GO:0016192//vesicle-mediated transport;GO:0007265//R…
XP_005908826	0	46.14	0.001	11.1	13.4383	0.0133014	0.677437	no	EMC4	ER membrane protein complex subunit 4 [Bos taurus]	-	-	-	-	GO:0005623//cell;GO:0044446//intracellular organelle part;GO:0016020//membrane;GO:0043229//intracellular organelle;GO:0031224//intrinsic component of membrane;GO:0043226//organelle;GO:0043227//membrane-bounded organelle;GO:0044432//endoplasmic reticulum part;GO:0043231//intracellular membrane-bounded organelle;GO:0044444//cytoplasmic part;GO:0044422//organelle part;GO:0044424//intracellular part;…	-	GO:0044763//single-organism cellular process;GO:0009987//cellular process;GO:0012501//programmed cell death;GO:0044699//single-organism process;GO:0008219//cell death
XP_014336913	0	119.577	0.001	11.03	13.4291	0.00337431	0.355344	no	SOHLH1	PREDICTED: spermatogenesis- and oogenesis-specific basic helix-loop-helix-containing protein 1 [Bison bison bison]	-	-	-	-	-	-	-
XP_005910657	0	192.923	0.001	10.8833	13.4098	0.00163852	0.255517	no	LOC102275782	PREDICTED: potassium voltage-gated channel subfamily H member 2-like, partial [Bos mutus]	-	-	-	-	GO:0044424//intracellular part;GO:0005622//intracellular;GO:0005623//cell;GO:0071944//cell periphery;GO:0005886//plasma membrane;GO:0005737//cytoplasm;GO:0044459//plasma membrane part;GO:0005887//integral component of plasma membrane;GO:0044444//cytoplasmic part;GO:0044464//cell part;GO:0044425//membrane part;GO:0031226//intrinsic component of plasma membrane;GO:0016021//integral component of mem…	GO:0044389//ubiquitin-like protein ligase binding;GO:0046873//metal ion transmembrane transporter activity;GO:0005515//protein binding;GO:0022892//substrate-specific transporter activity;GO:0019899//enzyme binding;GO:0022832//voltage-gated channel activity;GO:0022857//transmembrane transporter activity;GO:0015267//channel activity;GO:0015079//potassium ion transmembrane transporter activity;GO:00…	GO:0003012//muscle system process;GO:0015672//monovalent inorganic cation transport;GO:0034765//regulation of ion transmembrane transport;GO:0051051//negative regulation of transport;GO:0048519//negative regulation of biological process;GO:0086001//cardiac muscle cell action potential;GO:0050794//regulation of cellular process;GO:0032501//multicellular organismal process;GO:0044765//single-organi…
XP_005888524	0	72.03	0.001	9.79333	13.2576	0.00715957	0.505642	no	HSD17B10	PREDICTED: 3-hydroxyacyl-CoA dehydrogenase type-2 isoform X1 [Bos mutus]	Metabolism	Amino acid metabolism	ko00280//Valine, leucine and isoleucine degradation	K08683	GO:0005623//cell;GO:0043231//intracellular membrane-bounded organelle;GO:0044424//intracellular part;GO:0043226//organelle;GO:0043229//intracellular organelle;GO:0005622//intracellular;GO:0044464//cell part;GO:0043227//membrane-bounded organelle	GO:0016616//oxidoreductase activity, acting on the CH-OH group of donors, NAD or NADP as acceptor;GO:0003824//catalytic activity;GO:0005488//binding;GO:1901363//heterocyclic compound binding;GO:0097159//organic cyclic compound binding;GO:0003723//RNA binding;GO:0033764//steroid dehydrogenase activity, acting on the CH-OH group of donors, NAD or NADP as acceptor;GO:0016491//oxidoreductase activity…	GO:0008152//metabolic process;GO:0016070//RNA metabolic process;GO:0044260//cellular macromolecule metabolic process;GO:0071704//organic substance metabolic process;GO:0046483//heterocycle metabolic process;GO:0034641//cellular nitrogen compound metabolic process;GO:0044699//single-organism process;GO:1901360//organic cyclic compound metabolic process;GO:0006399//tRNA metabolic process;GO:0044238…
Unigene020738	0	8.66667	0.001	9.72	13.2467	0.01753	0.757168	no	-	-	-	-	-	-	-	-	-
XM_014477150	0	74.7833	0.001	9.68667	13.2418	0.00085393	0.173627	no	SEC11A	PREDICTED: Bos mutus SEC11 homolog A, signal peptidase complex subunit (SEC11A), transcript variant X4, mRNA	Genetic Information Processing	Folding, sorting and degradation	ko03060//Protein export	K13280	GO:0043230//extracellular organelle;GO:0016020//membrane;GO:0031224//intrinsic component of membrane;GO:0005623//cell;GO:0044464//cell part;GO:0043229//intracellular organelle;GO:0044425//membrane part;GO:0043231//intracellular membrane-bounded organelle;GO:0031982//vesicle;GO:0044424//intracellular part;GO:0043227//membrane-bounded organelle;GO:0005576//extracellular region;GO:0043226//organelle…	GO:0070011//peptidase activity, acting on L-amino acid peptides;GO:0003824//catalytic activity;GO:0008233//peptidase activity;GO:0016787//hydrolase activity	GO:0043170//macromolecule metabolic process;GO:0051604//protein maturation;GO:0006508//proteolysis;GO:0044238//primary metabolic process;GO:0071704//organic substance metabolic process;GO:0019538//protein metabolic process;GO:0008152//metabolic process;GO:0010467//gene expression;GO:0016485//protein processing
XP_005907459	0	138.763	0.001	9.66	13.2378	0.00269738	0.322617	no	TSPYL1	PREDICTED: testis-specific Y-encoded-like protein 1 [Bos mutus]	-	-	-	-	GO:0043226//organelle;GO:0005622//intracellular;GO:0044424//intracellular part;GO:0043229//intracellular organelle;GO:0043227//membrane-bounded organelle;GO:0005623//cell;GO:0043231//intracellular membrane-bounded organelle;GO:0044464//cell part	GO:0005488//binding;GO:0005515//protein binding	GO:0016043//cellular component organization;GO:0043933//macromolecular complex subunit organization;GO:0071822//protein complex subunit organization;GO:0034728//nucleosome organization;GO:0071840//cellular component organization or biogenesis;GO:0009987//cellular process;GO:0071824//protein-DNA complex subunit organization;GO:0006325//chromatin organization
XP_005908313	0	107.447	0.001	9.64333	13.2353	0.000446009	0.117305	no	FAM98C	PREDICTED: protein FAM98C [Bos mutus]	-	-	-	-	-	-	-
XP_005894561	0	381.387	0.001	9.63667	13.2343	0.000564216	0.133157	no	ATXN2L	PREDICTED: ataxin-2-like protein isoform X5 [Bos mutus]	-	-	-	-	-	-	-
XP_005895383	0	97.1567	0.001	9.61667	13.2313	0.0046731	0.423019	no	SORBS3	PREDICTED: vinexin isoform X3 [Bos mutus]	-	-	-	-	GO:0005623//cell;GO:0043229//intracellular organelle;GO:0005912//adherens junction;GO:0030054//cell junction;GO:0043227//membrane-bounded organelle;GO:0005924//cell-substrate adherens junction;GO:0044424//intracellular part;GO:0043226//organelle;GO:0030055//cell-substrate junction;GO:0043231//intracellular membrane-bounded organelle;GO:0070161//anchoring junction;GO:0005622//intracellular;GO:0044…	GO:0005515//protein binding;GO:0005488//binding;GO:0008092//cytoskeletal protein binding	GO:0051716//cellular response to stimulus;GO:0051128//regulation of cellular component organization;GO:0050896//response to stimulus;GO:0065007//biological regulation;GO:0051495//positive regulation of cytoskeleton organization;GO:0036211//protein modification process;GO:0044238//primary metabolic process;GO:0032233//positive regulation of actin filament bundle assembly;GO:0022610//biological adh…
XP_005908044	0	77.9333	0.001	9.58	13.2258	0.00644198	0.487203	no	SLC9A3R1	PREDICTED: Na(+)/H(+) exchange regulatory cofactor NHE-RF1 [Bos mutus]	-	-	-	-	GO:0097223//sperm part;GO:1903561//extracellular vesicle;GO:0005856//cytoskeleton;GO:0097458//neuron part;GO:0043229//intracellular organelle;GO:0071944//cell periphery;GO:0005902//microvillus;GO:0043232//intracellular non-membrane-bounded organelle;GO:0005576//extracellular region;GO:0031514//motile cilium;GO:0032421//stereocilium bundle;GO:0005929//cilium;GO:0005815//microtubule organizing cent…	GO:0005488//binding;GO:0019904//protein domain specific binding;GO:0005102//receptor binding;GO:0031690//adrenergic receptor binding;GO:0005515//protein binding;GO:0098772//molecular function regulator;GO:0016247//channel regulator activity;GO:0019899//enzyme binding;GO:0001664//G-protein coupled receptor binding	GO:0002064//epithelial cell development;GO:0034613//cellular protein localization;GO:0048699//generation of neurons;GO:0048017//inositol lipid-mediated signaling;GO:0002009//morphogenesis of an epithelium;GO:1902580//single-organism cellular localization;GO:0009987//cellular process;GO:0042491//auditory receptor cell differentiation;GO:0070293//renal absorption;GO:0006913//nucleocytoplasmic trans…
XP_005895234	0	39.79	0.001	9.35	13.1908	0.00248013	0.312194	no	MESP1	PREDICTED: mesoderm posterior protein 1, partial [Bos mutus]	-	-	-	-	GO:0043229//intracellular organelle;GO:0043227//membrane-bounded organelle;GO:0043231//intracellular membrane-bounded organelle;GO:0044464//cell part;GO:0043226//organelle;GO:0005623//cell;GO:0005622//intracellular;GO:0044424//intracellular part	GO:0000982//transcription factor activity, RNA polymerase II core promoter proximal region sequence-specific binding;GO:1901363//heterocyclic compound binding;GO:0003700//transcription factor activity, sequence-specific DNA binding;GO:0005515//protein binding;GO:0003677//DNA binding;GO:0001071//nucleic acid binding transcription factor activity;GO:0044212//transcription regulatory region DNA bind…	GO:0032501//multicellular organismal process;GO:0044699//single-organism process;GO:0006807//nitrogen compound metabolic process;GO:0001707//mesoderm formation;GO:0007369//gastrulation;GO:2000826//regulation of heart morphogenesis;GO:0022603//regulation of anatomical structure morphogenesis;GO:0035051//cardiocyte differentiation;GO:0009653//anatomical structure morphogenesis;GO:0061061//muscle st…
XP_005899102	0	18.0933	0.001	9.31333	13.1851	0.0106963	0.624018	no	ARL9	PREDICTED: ADP-ribosylation factor-like protein 9 [Bos mutus]	-	-	-	-	GO:0005623//cell;GO:0044464//cell part	GO:0001883//purine nucleoside binding;GO:0005488//binding;GO:0097159//organic cyclic compound binding;GO:0001882//nucleoside binding;GO:0032550//purine ribonucleoside binding;GO:0032549//ribonucleoside binding;GO:0036094//small molecule binding;GO:1901363//heterocyclic compound binding;GO:0097367//carbohydrate derivative binding	GO:0009987//cellular process;GO:0035556//intracellular signal transduction;GO:0007154//cell communication;GO:0050789//regulation of biological process;GO:0007165//signal transduction;GO:0044700//single organism signaling;GO:0044763//single-organism cellular process;GO:0050794//regulation of cellular process;GO:0051716//cellular response to stimulus;GO:0023052//signaling;GO:0044699//single-organis…
XP_005890775	0	127.487	0.001	9.3	13.183	0.00305602	0.338693	no	ACTL9	PREDICTED: actin-like protein 9 [Bos mutus]	-	-	-	-	GO:0044424//intracellular part;GO:0044464//cell part;GO:0005622//intracellular;GO:0043229//intracellular organelle;GO:0043228//non-membrane-bounded organelle;GO:0005623//cell;GO:0043232//intracellular non-membrane-bounded organelle;GO:0043226//organelle	-	-
XP_005907840	0	10.9233	0.001	9.24667	13.1747	0.0210144	0.803435	no	NDUFS5	NADH dehydrogenase [ubiquinone] iron-sulfur protein 5 [Bos taurus]	Metabolism	Energy metabolism	ko00190//Oxidative phosphorylation	K03938	GO:0019866//organelle inner membrane;GO:0005739//mitochondrion;GO:0044444//cytoplasmic part;GO:0044424//intracellular part;GO:0031975//envelope;GO:0043231//intracellular membrane-bounded organelle;GO:0043227//membrane-bounded organelle;GO:0044422//organelle part;GO:0044425//membrane part;GO:0031090//organelle membrane;GO:0005737//cytoplasm;GO:0005622//intracellular;GO:0005740//mitochondrial envel…	-	GO:0010257//NADH dehydrogenase complex assembly;GO:0071840//cellular component organization or biogenesis;GO:0008152//metabolic process;GO:0006461//protein complex assembly;GO:0044085//cellular component biogenesis;GO:0044699//single-organism process;GO:0065003//macromolecular complex assembly;GO:0071822//protein complex subunit organization;GO:0009987//cellular process;GO:0043933//macromolecular…
XP_005892864	0	29.9067	0.001	9.01667	13.1384	0.000523357	0.128685	no	AP1S1	AP-1 complex subunit sigma-1A [Homo sapiens]	Cellular Processes	Transport and catabolism	ko04142//Lysosome	K12394	GO:0044433//cytoplasmic vesicle part;GO:0012505//endomembrane system;GO:0005737//cytoplasm;GO:0043234//protein complex;GO:0033267//axon part;GO:0030130//clathrin coat of trans-Golgi network vesicle;GO:0016023//cytoplasmic, membrane-bounded vesicle;GO:0044431//Golgi apparatus part;GO:0030658//transport vesicle membrane;GO:0098805//whole membrane;GO:0043226//organelle;GO:0005798//Golgi-associated v…	GO:0022892//substrate-specific transporter activity;GO:0005215//transporter activity	GO:0048002//antigen processing and presentation of peptide antigen;GO:0016192//vesicle-mediated transport;GO:0002831//regulation of response to biotic stimulus;GO:0019884//antigen processing and presentation of exogenous antigen;GO:0050688//regulation of defense response to virus;GO:0051179//localization;GO:0080134//regulation of response to stress;GO:0002697//regulation of immune effector proces…
XP_014336565	0	118.02	0.001	8.96667	13.1304	0.000289315	0.0916415	no	RMND5B	PREDICTED: protein RMD5 homolog B isoform X1 [Bos taurus]	-	-	-	-	-	-	-
XP_005888915	0	324.877	0.001	8.95	13.1277	1.3e-07	0.000572928	up	MIB2	PREDICTED: E3 ubiquitin-protein ligase MIB2 [Bos mutus]	-	-	-	-	-	-	-
XP_005901221	0	62.9567	0.001	8.90667	13.1207	0.00871349	0.563128	no	PGAM1	phosphoglycerate mutase 1 [Bos taurus]	Organismal Systems;Metabolism	Carbohydrate metabolism;Amino acid metabolism;Endocrine system;Global and Overview	ko01200//Carbon metabolism;ko04922//Glucagon signaling pathway;ko01230//Biosynthesis of amino acids;ko00010//Glycolysis / Gluconeogenesis;ko00260//Glycine, serine and threonine metabolism	K01834	-	-	-
XP_005909379	0.0166667	274.373	0.001	8.85	13.1115	0.000837454	0.172265	no	CCDC110	PREDICTED: coiled-coil domain-containing protein 110 [Bos taurus]	-	-	-	-	GO:0044422//organelle part;GO:0043227//membrane-bounded organelle;GO:0043231//intracellular membrane-bounded organelle;GO:0044424//intracellular part;GO:0043233//organelle lumen;GO:0070013//intracellular organelle lumen;GO:0005634//nucleus;GO:0031974//membrane-enclosed lumen;GO:0005622//intracellular;GO:0043229//intracellular organelle;GO:0044464//cell part;GO:0043226//organelle;GO:0044446//intra…	-	-
XP_005902183	0	89.4433	0.001	8.74667	13.0945	0.00531415	0.45166	no	PCBP2	poly(rC)-binding protein 2 isoform c [Homo sapiens]	-	-	-	-	GO:0031981//nuclear lumen;GO:0044424//intracellular part;GO:0044464//cell part;GO:0031974//membrane-enclosed lumen;GO:0005634//nucleus;GO:0030055//cell-substrate junction;GO:0044428//nuclear part;GO:0044421//extracellular region part;GO:0070013//intracellular organelle lumen;GO:0044446//intracellular organelle part;GO:0070161//anchoring junction;GO:0043226//organelle;GO:0005623//cell;GO:0030054//…	GO:0003676//nucleic acid binding;GO:0097159//organic cyclic compound binding;GO:0003723//RNA binding;GO:0019899//enzyme binding;GO:1901363//heterocyclic compound binding;GO:0044389//ubiquitin-like protein ligase binding;GO:0005515//protein binding;GO:0005488//binding	GO:0046483//heterocycle metabolic process;GO:0050789//regulation of biological process;GO:0044248//cellular catabolic process;GO:0006508//proteolysis;GO:0009057//macromolecule catabolic process;GO:0006952//defense response;GO:0010467//gene expression;GO:0044265//cellular macromolecule catabolic process;GO:0002192//IRES-dependent translational initiation;GO:0006139//nucleobase-containing compound …
XP_005898794	0	148.43	0.001	8.65333	13.079	0.0024548	0.312194	no	CCT3	T-complex protein 1 subunit gamma [Bos taurus]	-	-	-	-	GO:0043227//membrane-bounded organelle;GO:0032991//macromolecular complex;GO:0043230//extracellular organelle;GO:0043228//non-membrane-bounded organelle;GO:0043232//intracellular non-membrane-bounded organelle;GO:1903561//extracellular vesicle;GO:0043226//organelle;GO:0005623//cell;GO:0005856//cytoskeleton;GO:0043229//intracellular organelle;GO:0015630//microtubule cytoskeleton;GO:0005576//extrac…	GO:0001882//nucleoside binding;GO:0001883//purine nucleoside binding;GO:0032549//ribonucleoside binding;GO:0005515//protein binding;GO:0005488//binding;GO:0097367//carbohydrate derivative binding;GO:0003723//RNA binding;GO:1901363//heterocyclic compound binding;GO:0032550//purine ribonucleoside binding;GO:0003676//nucleic acid binding;GO:0036094//small molecule binding;GO:0097159//organic cyclic …	GO:0044085//cellular component biogenesis;GO:0009987//cellular process;GO:0008037//cell recognition;GO:0051704//multi-organism process;GO:0051234//establishment of localization;GO:0051179//localization;GO:0016043//cellular component organization;GO:0009988//cell-cell recognition;GO:0044703//multi-organism reproductive process;GO:0044763//single-organism cellular process;GO:0044699//single-organis…
XM_014481618	0	113.06	0.001	8.40667	13.0373	3.51e-07	0.0013251	up	ZBTB8OS	PREDICTED: Bos mutus zinc finger and BTB domain containing 8 opposite strand (ZBTB8OS), transcript variant X5, mRNA	-	-	-	-	-	-	-
XP_005895939	0	132.293	0.001	8.28667	13.0166	0.00290118	0.334141	no	UBXN11	PREDICTED: LOW QUALITY PROTEIN: UBX domain-containing protein 11 [Bos mutus]	-	-	-	-	-	-	-
XP_005890429	0	35.04	0.001	8.26667	13.0131	0.018311	0.76904	no	CBX1	chromobox protein homolog 1 [Homo sapiens]	-	-	-	-	GO:0005634//nucleus;GO:0000775//chromosome, centromeric region;GO:0043227//membrane-bounded organelle;GO:0032991//macromolecular complex;GO:0043229//intracellular organelle;GO:0005622//intracellular;GO:0043233//organelle lumen;GO:0043231//intracellular membrane-bounded organelle;GO:0031974//membrane-enclosed lumen;GO:0044446//intracellular organelle part;GO:0044422//organelle part;GO:0005856//cyt…	GO:0019899//enzyme binding;GO:0005515//protein binding;GO:0046983//protein dimerization activity;GO:0044877//macromolecular complex binding;GO:0005488//binding	GO:0010467//gene expression;GO:0044238//primary metabolic process;GO:0044249//cellular biosynthetic process;GO:0009058//biosynthetic process;GO:0008152//metabolic process;GO:0034645//cellular macromolecule biosynthetic process;GO:0043170//macromolecule metabolic process;GO:0019438//aromatic compound biosynthetic process;GO:1901576//organic substance biosynthetic process;GO:0032774//RNA biosynthet…
XP_005909329	0	36.26	0.001	8.19333	13.0002	0.00294949	0.334402	no	TMEM9	PREDICTED: transmembrane protein 9 [Bos mutus]	-	-	-	-	-	-	-
XP_005904456	0	57.3933	0.001	8.16667	12.9955	0.00990328	0.597478	no	PGAM2	PREDICTED: phosphoglycerate mutase 2 [Bos mutus]	Metabolism;Organismal Systems	Global and Overview;Carbohydrate metabolism;Amino acid metabolism;Endocrine system	ko01200//Carbon metabolism;ko04922//Glucagon signaling pathway;ko01230//Biosynthesis of amino acids;ko00010//Glycolysis / Gluconeogenesis;ko00260//Glycine, serine and threonine metabolism	K01834	-	-	-
XP_014337640	0	184.887	0.001	8.04667	12.9742	0.00174188	0.261054	no	MBD1	Methyl-CpG-binding domain protein 1 [Bos mutus]	-	-	-	-	-	-	-
XP_014334447	0	353.807	0.001	7.99	12.964	1.47e-05	0.0152383	up	UPF1	PREDICTED: regulator of nonsense transcripts 1 [Bos mutus]	Genetic Information Processing	Translation	ko03013//RNA transport;ko03015//mRNA surveillance pathway	K14326	GO:0044464//cell part;GO:0043229//intracellular organelle;GO:0005622//intracellular;GO:0005681//spliceosomal complex;GO:0031974//membrane-enclosed lumen;GO:0043227//membrane-bounded organelle;GO:0043234//protein complex;GO:0005623//cell;GO:0044422//organelle part;GO:0044446//intracellular organelle part;GO:0043226//organelle;GO:0031981//nuclear lumen;GO:0044424//intracellular part;GO:0032991//mac…	GO:0032549//ribonucleoside binding;GO:0016787//hydrolase activity;GO:0036094//small molecule binding;GO:0016817//hydrolase activity, acting on acid anhydrides;GO:0097367//carbohydrate derivative binding;GO:0003676//nucleic acid binding;GO:0032550//purine ribonucleoside binding;GO:0046872//metal ion binding;GO:0001882//nucleoside binding;GO:0004386//helicase activity;GO:0016462//pyrophosphatase ac…	GO:0044237//cellular metabolic process;GO:0006518//peptide metabolic process;GO:0007549//dosage compensation;GO:0071704//organic substance metabolic process;GO:0016070//RNA metabolic process;GO:0009056//catabolic process;GO:0043043//peptide biosynthetic process;GO:0044270//cellular nitrogen compound catabolic process;GO:1901575//organic substance catabolic process;GO:0022411//cellular component d…
XM_005904464	0	272.52	0.001	7.88	12.944	0.000103626	0.0502357	no	POLR3E	PREDICTED: Bos mutus polymerase (RNA) III (DNA directed) polypeptide E (80kD) (POLR3E), transcript variant X3, mRNA	Metabolism;Organismal Systems;Genetic Information Processing	Transcription;Immune system;Nucleotide metabolism	ko00230//Purine metabolism;ko00240//Pyrimidine metabolism;ko04623//Cytosolic DNA-sensing pathway;ko03020//RNA polymerase	K14721	GO:0044451//nucleoplasm part;GO:0005623//cell;GO:0043233//organelle lumen;GO:0044424//intracellular part;GO:0031981//nuclear lumen;GO:0005622//intracellular;GO:0044422//organelle part;GO:0044464//cell part;GO:0043229//intracellular organelle;GO:0044446//intracellular organelle part;GO:0031974//membrane-enclosed lumen;GO:0005654//nucleoplasm;GO:0070013//intracellular organelle lumen;GO:0043226//or…	-	GO:0008152//metabolic process;GO:0071704//organic substance metabolic process;GO:0043170//macromolecule metabolic process;GO:0010467//gene expression
XP_014332875	0	35.44	0.001	7.73667	12.9175	0.00405722	0.394274	no	LOC106700724	PREDICTED: rhox homeobox family member 1 [Bos taurus]	-	-	-	-	-	-	GO:1901362//organic cyclic compound biosynthetic process;GO:0034641//cellular nitrogen compound metabolic process;GO:0006807//nitrogen compound metabolic process;GO:0071704//organic substance metabolic process;GO:0044238//primary metabolic process;GO:0009058//biosynthetic process;GO:0010467//gene expression;GO:0034645//cellular macromolecule biosynthetic process;GO:0006139//nucleobase-containing …
XP_014334062	0	15.99	0.001	7.72333	12.915	0.045538	1	no	LOC102278990	PREDICTED: transmembrane protein 230 [Bos taurus]	-	-	-	-	-	-	-
XP_005903998	0	109.893	0.001	7.67667	12.9063	0.000201273	0.0765983	no	TBRG1	PREDICTED: transforming growth factor beta regulator 1 [Bos mutus]	-	-	-	-	GO:0043226//organelle;GO:0043227//membrane-bounded organelle	-	GO:0046483//heterocycle metabolic process;GO:0034641//cellular nitrogen compound metabolic process;GO:0009987//cellular process;GO:0044763//single-organism cellular process;GO:0051179//localization;GO:0006725//cellular aromatic compound metabolic process;GO:0022402//cell cycle process;GO:0051649//establishment of localization in cell;GO:0008152//metabolic process;GO:0065007//biological regulation…
XP_005902002	0	33.4467	0.001	7.39	12.8514	0.0194439	0.787061	no	CDO1	PREDICTED: cysteine dioxygenase type 1 [Bos mutus]	Metabolism	Amino acid metabolism;Metabolism of other amino acids	ko00270//Cysteine and methionine metabolism;ko00430//Taurine and hypotaurine metabolism	K00456	-	-	-
Unigene001104	0	30	0.001	7.31333	12.8363	0.0222617	0.823069	no	Unigene001104	Photosystem II 10 kDa polypeptide, chloroplast [Salmo salar]	-	-	-	-	-	-	-
Unigene002454	0	6.33333	0.001	7.05	12.7834	0.0351631	0.967672	no	-	-	-	-	-	-	-	-	-
XP_014333334	0	17.16	0.001	7.04333	12.782	0.00174172	0.261054	no	LOC106700785	TPA: fructose-1,6-bisphosphate aldolase A-like [Bos taurus]	-	-	-	-	-	-	-
XP_005908283	0	50.5133	0.001	6.89	12.7503	0.00262704	0.318225	no	TBCB	PREDICTED: tubulin-folding cofactor B [Bos mutus]	-	-	-	-	GO:0015630//microtubule cytoskeleton;GO:0043226//organelle;GO:0005623//cell;GO:0005856//cytoskeleton;GO:0044444//cytoplasmic part;GO:0043229//intracellular organelle;GO:0043232//intracellular non-membrane-bounded organelle;GO:0005622//intracellular;GO:0044464//cell part;GO:0005737//cytoplasm;GO:0043228//non-membrane-bounded organelle;GO:0044424//intracellular part	-	GO:0007275//multicellular organism development;GO:0048731//system development;GO:0009987//cellular process;GO:0032502//developmental process;GO:0044699//single-organism process;GO:0032501//multicellular organismal process;GO:0044763//single-organism cellular process;GO:0044767//single-organism developmental process;GO:0044707//single-multicellular organism process;GO:0048856//anatomical structure…
XP_005901349	0	64.5167	0.001	6.77	12.7249	0.00836146	0.552536	no	RAB3IL1	PREDICTED: guanine nucleotide exchange factor for Rab-3A [Bos mutus]	-	-	-	-	-	GO:0098772//molecular function regulator;GO:0005085//guanyl-nucleotide exchange factor activity;GO:0005088//Ras guanyl-nucleotide exchange factor activity	GO:0065007//biological regulation;GO:0065009//regulation of molecular function;GO:0051179//localization;GO:0051234//establishment of localization;GO:0050790//regulation of catalytic activity;GO:0043087//regulation of GTPase activity;GO:0051336//regulation of hydrolase activity
Unigene033180	0	4.33333	0.001	6.71333	12.7128	0.0423121	1	no	-	-	-	-	-	-	-	-	-
XM_005907504	0	47.7933	0.001	6.69667	12.7092	0.0127995	0.66862	no	LOC102287859	PREDICTED: Bos mutus cell division cycle-associated protein 3-like (LOC102287859), mRNA	-	-	-	-	-	-	-
Unigene002334	0	26	0.001	6.36	12.6348	0.0261816	0.867223	no	Unigene002334	PREDICTED: chlorophyll a-b binding protein of LHCII type 1, partial [Rhinopithecus roxellana]	-	-	-	-	-	-	-
XP_005902178	0	72.9633	0.001	6.34667	12.6318	0.00703814	0.502932	no	PCBP2	poly(rC)-binding protein 2 isoform b [Homo sapiens]	-	-	-	-	GO:0031974//membrane-enclosed lumen;GO:0005737//cytoplasm;GO:0030054//cell junction;GO:0044444//cytoplasmic part;GO:0005912//adherens junction;GO:0043231//intracellular membrane-bounded organelle;GO:0005924//cell-substrate adherens junction;GO:0043229//intracellular organelle;GO:0044424//intracellular part;GO:0005622//intracellular;GO:0043226//organelle;GO:0044421//extracellular region part;GO:00…	GO:0003676//nucleic acid binding;GO:0005488//binding;GO:1901363//heterocyclic compound binding;GO:0005515//protein binding;GO:0097159//organic cyclic compound binding;GO:0019899//enzyme binding;GO:0003723//RNA binding;GO:0044389//ubiquitin-like protein ligase binding	GO:0010467//gene expression;GO:0051239//regulation of multicellular organismal process;GO:0044267//cellular protein metabolic process;GO:0044238//primary metabolic process;GO:0006950//response to stress;GO:0043603//cellular amide metabolic process;GO:1901575//organic substance catabolic process;GO:0006952//defense response;GO:0002683//negative regulation of immune system process;GO:0006508//prote…
XP_014338910	0	66.87	0.001	6.28667	12.6181	0.00806123	0.540123	no	ARMC12	PREDICTED: armadillo repeat-containing protein 12 [Bos taurus]	-	-	-	-	-	-	-
Unigene005710	0	9.33333	0.001	6.20333	12.5988	0.0160108	0.736038	no	-	-	-	-	-	-	-	-	-
XP_005906423	0	148.09	0.001	6.20333	12.5988	0.000108217	0.0510793	no	CDC14A	PREDICTED: dual specificity protein phosphatase CDC14A isoform X1 [Bos mutus]	Cellular Processes	Cell growth and death	ko04110//Cell cycle	K06639	-	-	-
XP_005908510	0	28.1733	0.001	6.11333	12.5777	0.0236899	0.838264	no	AK1	PREDICTED: adenylate kinase isoenzyme 1 isoform X2 [Bos mutus]	Metabolism	Nucleotide metabolism	ko00230//Purine metabolism	K00939	GO:0031982//vesicle;GO:0016020//membrane;GO:0042995//cell projection;GO:0036126//sperm flagellum;GO:0044421//extracellular region part;GO:0005623//cell;GO:0043227//membrane-bounded organelle;GO:0044424//intracellular part;GO:0005576//extracellular region;GO:0031514//motile cilium;GO:1903561//extracellular vesicle;GO:0097223//sperm part;GO:0044464//cell part;GO:0043230//extracellular organelle;GO:…	GO:0001883//purine nucleoside binding;GO:0016772//transferase activity, transferring phosphorus-containing groups;GO:0097367//carbohydrate derivative binding;GO:0036094//small molecule binding;GO:0016776//phosphotransferase activity, phosphate group as acceptor;GO:1901363//heterocyclic compound binding;GO:0097159//organic cyclic compound binding;GO:0032550//purine ribonucleoside binding;GO:001630…	GO:0006753//nucleoside phosphate metabolic process;GO:0034641//cellular nitrogen compound metabolic process;GO:0072521//purine-containing compound metabolic process;GO:0044238//primary metabolic process;GO:0044249//cellular biosynthetic process;GO:0046483//heterocycle metabolic process;GO:1901362//organic cyclic compound biosynthetic process;GO:0044237//cellular metabolic process;GO:0019693//ribo…
XP_014337925	0	28.1733	0.001	6.11333	12.5777	0.0236862	0.838264	no	AK1	PREDICTED: adenylate kinase isoenzyme 1 isoform X2 [Bos mutus]	Metabolism	Nucleotide metabolism	ko00230//Purine metabolism	K00939	GO:1903561//extracellular vesicle;GO:0097223//sperm part;GO:0044424//intracellular part;GO:0043227//membrane-bounded organelle;GO:0044464//cell part;GO:0044421//extracellular region part;GO:0005623//cell;GO:0036126//sperm flagellum;GO:0042995//cell projection;GO:0005622//intracellular;GO:0005929//cilium;GO:0016020//membrane;GO:0031982//vesicle;GO:0031514//motile cilium;GO:0005576//extracellular r…	GO:0016301//kinase activity;GO:0001882//nucleoside binding;GO:0097159//organic cyclic compound binding;GO:0003824//catalytic activity;GO:0032549//ribonucleoside binding;GO:0005488//binding;GO:0032550//purine ribonucleoside binding;GO:0097367//carbohydrate derivative binding;GO:0036094//small molecule binding;GO:0016772//transferase activity, transferring phosphorus-containing groups;GO:0016740//t…	GO:0044711//single-organism biosynthetic process;GO:0008152//metabolic process;GO:0009117//nucleotide metabolic process;GO:1901137//carbohydrate derivative biosynthetic process;GO:0044763//single-organism cellular process;GO:0009141//nucleoside triphosphate metabolic process;GO:0044281//small molecule metabolic process;GO:0090407//organophosphate biosynthetic process;GO:0072522//purine-containing…
XP_005890084	0	74.6667	0.001	6.10333	12.5754	0.00681796	0.5012	no	GSG1	PREDICTED: germ cell-specific gene 1 protein [Bos mutus]	-	-	-	-	GO:0044425//membrane part;GO:0016020//membrane;GO:0043226//organelle;GO:0005623//cell;GO:0043231//intracellular membrane-bounded organelle;GO:0044464//cell part;GO:0044424//intracellular part;GO:0031224//intrinsic component of membrane;GO:0043229//intracellular organelle;GO:0043227//membrane-bounded organelle;GO:0005622//intracellular	GO:0005488//binding;GO:0005515//protein binding;GO:0019899//enzyme binding	-
XP_014332161	0	50.92	0.001	5.99	12.5483	0.0116205	0.646002	no	ZNF414	Zinc finger protein 414, partial [Bos mutus]	-	-	-	-	GO:0044464//cell part;GO:0005623//cell;GO:0043227//membrane-bounded organelle;GO:0044424//intracellular part;GO:0043229//intracellular organelle;GO:0005622//intracellular;GO:0043231//intracellular membrane-bounded organelle;GO:0043226//organelle	GO:0003676//nucleic acid binding;GO:0097159//organic cyclic compound binding;GO:0005488//binding;GO:1901363//heterocyclic compound binding	GO:0097659//nucleic acid-templated transcription;GO:0044260//cellular macromolecule metabolic process;GO:0009058//biosynthetic process;GO:0090304//nucleic acid metabolic process;GO:0008152//metabolic process;GO:1901576//organic substance biosynthetic process;GO:0009059//macromolecule biosynthetic process;GO:0009987//cellular process;GO:0044238//primary metabolic process;GO:0010467//gene expressio…
XM_005911692	0	126.86	0.001	5.90333	12.5273	0.00307031	0.339564	no	FBXO46	PREDICTED: Bos mutus F-box protein 46 (FBXO46), mRNA	-	-	-	-	-	-	-
XP_005911377	0	99.83	0.001	5.89	12.5241	0.000454366	0.118325	no	LOC102280763	PREDICTED: scaffold attachment factor B1-like, partial [Bos mutus]	-	-	-	-	-	GO:0097159//organic cyclic compound binding;GO:0005488//binding	-
XP_014337812	0	18.8367	0.001	5.78667	12.4985	0.036966	0.974513	no	DCTN6	PREDICTED: dynactin subunit 6 isoform X2 [Ovis aries]	Organismal Systems	Excretory system	ko04962//Vasopressin-regulated water reabsorption	K10428	GO:0044424//intracellular part;GO:0043234//protein complex;GO:0044430//cytoskeletal part;GO:0044422//organelle part;GO:0043229//intracellular organelle;GO:0005623//cell;GO:0098687//chromosomal region;GO:0005875//microtubule associated complex;GO:0005856//cytoskeleton;GO:0043232//intracellular non-membrane-bounded organelle;GO:0005622//intracellular;GO:0032991//macromolecular complex;GO:0043228//n…	-	-
XM_005892902	0	71.3233	0.001	5.68333	12.4725	0.00725152	0.509776	no	PSMD6	PREDICTED: Bos mutus proteasome 26S subunit, non-ATPase 6 (PSMD6), transcript variant X2, mRNA	Genetic Information Processing	Folding, sorting and degradation	ko03050//Proteasome	K03037	GO:0044422//organelle part;GO:0044446//intracellular organelle part;GO:0044424//intracellular part;GO:0022624//proteasome accessory complex;GO:0005576//extracellular region;GO:1902494//catalytic complex;GO:0043226//organelle;GO:0005623//cell;GO:0043234//protein complex;GO:0005737//cytoplasm;GO:0005622//intracellular;GO:0043227//membrane-bounded organelle;GO:0044444//cytoplasmic part;GO:0031974//m…	GO:0016787//hydrolase activity;GO:0003824//catalytic activity;GO:0017111//nucleoside-triphosphatase activity;GO:0016462//pyrophosphatase activity;GO:0005488//binding;GO:0016818//hydrolase activity, acting on acid anhydrides, in phosphorus-containing anhydrides;GO:0016817//hydrolase activity, acting on acid anhydrides	GO:0035567//non-canonical Wnt signaling pathway;GO:0022403//cell cycle phase;GO:0080134//regulation of response to stress;GO:0016567//protein ubiquitination;GO:0002684//positive regulation of immune system process;GO:0007267//cell-cell signaling;GO:0042221//response to chemical;GO:0044700//single organism signaling;GO:0035556//intracellular signal transduction;GO:0006082//organic acid metabolic p…
XM_005905595	0	135.24	0.001	5.60667	12.4529	0.00281199	0.329614	no	PKM	PREDICTED: Bos mutus pyruvate kinase, muscle (PKM), transcript variant X3, mRNA	Metabolism	Global and Overview;Nucleotide metabolism;Carbohydrate metabolism	ko00230//Purine metabolism;ko01200//Carbon metabolism;ko01230//Biosynthesis of amino acids;ko00010//Glycolysis / Gluconeogenesis;ko00620//Pyruvate metabolism	K00873	GO:0043230//extracellular organelle;GO:0016020//membrane;GO:0043227//membrane-bounded organelle;GO:0044444//cytoplasmic part;GO:0005737//cytoplasm;GO:0005576//extracellular region;GO:0044424//intracellular part;GO:0005622//intracellular;GO:0031982//vesicle;GO:0042995//cell projection;GO:0044421//extracellular region part;GO:1903561//extracellular vesicle;GO:0043226//organelle;GO:0005623//cell;GO:…	GO:0097367//carbohydrate derivative binding;GO:0001883//purine nucleoside binding;GO:0003676//nucleic acid binding;GO:0032550//purine ribonucleoside binding;GO:0005515//protein binding;GO:0003823//antigen binding;GO:0005488//binding;GO:0016740//transferase activity;GO:0097159//organic cyclic compound binding;GO:0044877//macromolecular complex binding;GO:0023023//MHC protein complex binding;GO:000…	GO:0046390//ribose phosphate biosynthetic process;GO:0009058//biosynthetic process;GO:0009165//nucleotide biosynthetic process;GO:0048731//system development;GO:0042221//response to chemical;GO:1901293//nucleoside phosphate biosynthetic process;GO:1901360//organic cyclic compound metabolic process;GO:0072524//pyridine-containing compound metabolic process;GO:0006753//nucleoside phosphate metaboli…
XP_005893201	0	60.2467	0.001	5.59	12.4486	0.0013186	0.220595	no	COPS6	PREDICTED: COP9 signalosome complex subunit 6 [Bos mutus]	-	-	-	-	-	-	-
XP_014337960	0	88.9533	0.001	5.53	12.4331	0.000357418	0.101585	no	OSBP2	PREDICTED: oxysterol-binding protein 2-like [Bos mutus]	-	-	-	-	GO:0005623//cell;GO:0097458//neuron part;GO:0044464//cell part;GO:0036477//somatodendritic compartment;GO:0043005//neuron projection;GO:0030425//dendrite;GO:0042995//cell projection	GO:0005496//steroid binding;GO:0032934//sterol binding;GO:0005488//binding;GO:0097159//organic cyclic compound binding;GO:0008289//lipid binding	GO:0048856//anatomical structure development;GO:0044702//single organism reproductive process;GO:0022414//reproductive process;GO:0048609//multicellular organismal reproductive process;GO:0051179//localization;GO:0003006//developmental process involved in reproduction;GO:0044699//single-organism process;GO:0019953//sexual reproduction;GO:0007276//gamete generation;GO:0032502//developmental proces…
XP_005887096	0	35.8633	0.001	5.50333	12.4261	0.00294354	0.334402	no	SPATA3	PREDICTED: spermatogenesis-associated protein 3 [Bos mutus]	-	-	-	-	-	-	-
XP_005901826	0	59.9433	0.001	5.48333	12.4208	0.000943325	0.18067	no	POLB	DNA polymerase beta [Bos taurus]	Genetic Information Processing	Replication and repair	ko03410//Base excision repair	K02330	GO:0043232//intracellular non-membrane-bounded organelle;GO:0005622//intracellular;GO:0044422//organelle part;GO:0043228//non-membrane-bounded organelle;GO:0032991//macromolecular complex;GO:0005623//cell;GO:0044424//intracellular part;GO:0044464//cell part;GO:0015630//microtubule cytoskeleton;GO:0043227//membrane-bounded organelle;GO:0044430//cytoskeletal part;GO:0005856//cytoskeleton;GO:0043231…	GO:0008092//cytoskeletal protein binding;GO:0016740//transferase activity;GO:0043169//cation binding;GO:0016772//transferase activity, transferring phosphorus-containing groups;GO:0003824//catalytic activity;GO:0034061//DNA polymerase activity;GO:0015631//tubulin binding;GO:0016779//nucleotidyltransferase activity;GO:0043167//ion binding;GO:0005488//binding;GO:0005515//protein binding	GO:0035272//exocrine system development;GO:0006310//DNA recombination;GO:0071704//organic substance metabolic process;GO:0044763//single-organism cellular process;GO:0006259//DNA metabolic process;GO:0006807//nitrogen compound metabolic process;GO:0090304//nucleic acid metabolic process;GO:0007431//salivary gland development;GO:0033152//immunoglobulin V(D)J recombination;GO:0006915//apoptotic pro…
XP_005906279	0	77.75	0.001	5.43667	12.4085	0.00575767	0.468144	no	RBBP4	PREDICTED: histone-binding protein RBBP4 [Oryctolagus cuniculus]	-	-	-	-	GO:0005694//chromosome;GO:0031981//nuclear lumen;GO:0000118//histone deacetylase complex;GO:0044427//chromosomal part;GO:0043228//non-membrane-bounded organelle;GO:0043231//intracellular membrane-bounded organelle;GO:0031974//membrane-enclosed lumen;GO:0000228//nuclear chromosome;GO:0044428//nuclear part;GO:0044454//nuclear chromosome part;GO:1902494//catalytic complex;GO:0005622//intracellular;G…	GO:0000977//RNA polymerase II regulatory region sequence-specific DNA binding;GO:0097159//organic cyclic compound binding;GO:0043566//structure-specific DNA binding;GO:0016810//hydrolase activity, acting on carbon-nitrogen (but not peptide) bonds;GO:0044212//transcription regulatory region DNA binding;GO:0016787//hydrolase activity;GO:0043565//sequence-specific DNA binding;GO:0044877//macromolecu…	GO:0035556//intracellular signal transduction;GO:1901360//organic cyclic compound metabolic process;GO:0070271//protein complex biogenesis;GO:0006323//DNA packaging;GO:0009059//macromolecule biosynthetic process;GO:0006139//nucleobase-containing compound metabolic process;GO:0044271//cellular nitrogen compound biosynthetic process;GO:0050896//response to stimulus;GO:0008152//metabolic process;GO:…
XP_005909252	0	50.72	0.001	5.41667	12.4032	0.0117602	0.64761	no	USF1	upstream stimulatory factor 1 [Bos taurus]	-	-	-	-	GO:0043226//organelle;GO:0044464//cell part;GO:0044424//intracellular part;GO:0043233//organelle lumen;GO:0044446//intracellular organelle part;GO:0005634//nucleus;GO:0005622//intracellular;GO:0043231//intracellular membrane-bounded organelle;GO:0044422//organelle part;GO:0043229//intracellular organelle;GO:0031974//membrane-enclosed lumen;GO:0032991//macromolecular complex;GO:0043234//protein co…	GO:0019900//kinase binding;GO:0046983//protein dimerization activity;GO:0000981//RNA polymerase II transcription factor activity, sequence-specific DNA binding;GO:0019899//enzyme binding;GO:0008134//transcription factor binding;GO:0003700//transcription factor activity, sequence-specific DNA binding;GO:0097159//organic cyclic compound binding;GO:1901363//heterocyclic compound binding;GO:0003677//…	GO:0010556//regulation of macromolecule biosynthetic process;GO:0006139//nucleobase-containing compound metabolic process;GO:0031668//cellular response to extracellular stimulus;GO:0044403//symbiosis, encompassing mutualism through parasitism;GO:0007584//response to nutrient;GO:1900048//positive regulation of hemostasis;GO:0061041//regulation of wound healing;GO:0031323//regulation of cellular me…
XP_005908172	0	19.0667	0.001	5.4	12.3987	0.00927288	0.580818	no	CNBP	PREDICTED: cellular nucleic acid-binding protein isoform X4 [Nomascus leucogenys]	-	-	-	-	GO:0043226//organelle;GO:0005622//intracellular;GO:0044444//cytoplasmic part;GO:0044424//intracellular part;GO:0005623//cell;GO:0044464//cell part;GO:0005737//cytoplasm;GO:0043231//intracellular membrane-bounded organelle;GO:0043227//membrane-bounded organelle;GO:0043229//intracellular organelle	GO:0001071//nucleic acid binding transcription factor activity;GO:0043167//ion binding;GO:0046872//metal ion binding;GO:0097159//organic cyclic compound binding;GO:1901363//heterocyclic compound binding;GO:0003723//RNA binding;GO:0005488//binding;GO:0003677//DNA binding;GO:0043169//cation binding;GO:0046914//transition metal ion binding;GO:0003676//nucleic acid binding	GO:0008152//metabolic process;GO:1901576//organic substance biosynthetic process;GO:0018130//heterocycle biosynthetic process;GO:0006139//nucleobase-containing compound metabolic process;GO:0044260//cellular macromolecule metabolic process;GO:1902652//secondary alcohol metabolic process;GO:0006629//lipid metabolic process;GO:1901360//organic cyclic compound metabolic process;GO:0006725//cellular …
XP_005893556	0	64.5467	0.001	5.39333	12.397	0.00742493	0.515587	no	ALKBH5	PREDICTED: RNA demethylase ALKBH5 [Bos mutus]	-	-	-	-	-	-	-
XM_005908134	0	253.323	0.001	5.28667	12.3681	2.01e-05	0.0183403	up	RECQL4	PREDICTED: Bos mutus RecQ helicase-like 4 (RECQL4), mRNA	-	-	-	-	-	-	-
XP_005910363	0	62.7233	0.001	5.25667	12.3599	0.00830942	0.549784	no	LOC102267383	DKFZP434G072 [Homo sapiens]	-	-	-	-	-	-	-
XP_005896417	0	62.92	0.001	5.19667	12.3434	0.00871331	0.563128	no	RIBC2	PREDICTED: RIB43A-like with coiled-coils protein 2 [Bos mutus]	-	-	-	-	-	-	-
XM_005909437	0	79.6467	0.001	5.18333	12.3397	0.00622268	0.481649	no	CSDC2	PREDICTED: Bos mutus cold shock domain containing C2, RNA binding (CSDC2), transcript variant X1, mRNA	-	-	-	-	GO:0043231//intracellular membrane-bounded organelle;GO:0005623//cell;GO:0005622//intracellular;GO:0043227//membrane-bounded organelle;GO:0044424//intracellular part;GO:0044464//cell part;GO:0043226//organelle;GO:0043229//intracellular organelle	GO:0097159//organic cyclic compound binding;GO:0005488//binding;GO:1901363//heterocyclic compound binding;GO:0005515//protein binding;GO:0003676//nucleic acid binding	GO:0071704//organic substance metabolic process;GO:0044238//primary metabolic process;GO:0010467//gene expression;GO:0034654//nucleobase-containing compound biosynthetic process;GO:0016070//RNA metabolic process;GO:0034645//cellular macromolecule biosynthetic process;GO:0006139//nucleobase-containing compound metabolic process;GO:1901360//organic cyclic compound metabolic process;GO:0043170//macr…
XP_005909629	0	137.433	0.001	5.15333	12.3313	0.00273533	0.323628	no	ZFAND4	PREDICTED: LOW QUALITY PROTEIN: AN1-type zinc finger protein 4 [Bos mutus]	-	-	-	-	-	GO:0043169//cation binding;GO:0043167//ion binding;GO:0005488//binding	-
Unigene005580	0	5	0.001	5.09	12.3134	0.0324042	0.943628	no	Unigene005580	PREDICTED: LOW QUALITY PROTEIN: ninein-like protein isoform X5 [Bos taurus]	-	-	-	-	-	-	-
XM_005901119	0	128.543	0.001	4.88333	12.2537	0.000152458	0.0670724	no	TXNDC2	PREDICTED: Bos mutus thioredoxin domain containing 2 (spermatozoa) (TXNDC2), mRNA	-	-	-	-	-	-	-
XP_005904250	0	196.213	0.001	4.79333	12.2268	3.34e-05	0.0238787	up	BAG6	PREDICTED: large proline-rich protein BAG6 isoform X4 [Bos mutus]	-	-	-	-	GO:0044446//intracellular organelle part;GO:0044444//cytoplasmic part;GO:0070013//intracellular organelle lumen;GO:0044424//intracellular part;GO:0044422//organelle part;GO:0032991//macromolecular complex;GO:0044428//nuclear part;GO:0031974//membrane-enclosed lumen;GO:0043231//intracellular membrane-bounded organelle;GO:1905369//endopeptidase complex;GO:0000502//proteasome complex;GO:0031981//nuc…	GO:0005488//binding;GO:0032182//ubiquitin-like protein binding;GO:0019899//enzyme binding;GO:0002020//protease binding;GO:0032403//protein complex binding;GO:0044389//ubiquitin-like protein ligase binding;GO:0005515//protein binding;GO:0044877//macromolecular complex binding;GO:0043130//ubiquitin binding;GO:0043021//ribonucleoprotein complex binding;GO:0031072//heat shock protein binding	GO:0012501//programmed cell death;GO:0030163//protein catabolic process;GO:0045048//protein insertion into ER membrane;GO:0034976//response to endoplasmic reticulum stress;GO:0044703//multi-organism reproductive process;GO:0031647//regulation of protein stability;GO:0009987//cellular process;GO:0061136//regulation of proteasomal protein catabolic process;GO:0045143//homologous chromosome segregat…
XP_005910350	0	45.1767	0.001	4.78333	12.2238	0.0135121	0.682624	no	DHRS1	PREDICTED: dehydrogenase/reductase SDR family member 1 [Bos mutus]	-	-	-	-	GO:0031967//organelle envelope;GO:0016020//membrane;GO:0044424//intracellular part;GO:0043226//organelle;GO:0031975//envelope;GO:0043227//membrane-bounded organelle;GO:0031090//organelle membrane;GO:0044464//cell part;GO:0005622//intracellular;GO:0043229//intracellular organelle;GO:0044422//organelle part;GO:0043231//intracellular membrane-bounded organelle;GO:0044446//intracellular organelle par…	-	-
XP_014333874	0	59.57	0.001	4.77333	12.2208	0.0093806	0.584105	no	MAEA	Macrophage erythroblast attacher, partial [Bos mutus]	-	-	-	-	GO:0099568//cytoplasmic region;GO:0043227//membrane-bounded organelle;GO:0034399//nuclear periphery;GO:0043228//non-membrane-bounded organelle;GO:0005623//cell;GO:0005886//plasma membrane;GO:0044430//cytoskeletal part;GO:0043232//intracellular non-membrane-bounded organelle;GO:0044428//nuclear part;GO:0005634//nucleus;GO:0070013//intracellular organelle lumen;GO:0015629//actin cytoskeleton;GO:004…	-	GO:0030097//hemopoiesis;GO:0071840//cellular component organization or biogenesis;GO:0048534//hematopoietic or lymphoid organ development;GO:0043069//negative regulation of programmed cell death;GO:0002520//immune system development;GO:0010941//regulation of cell death;GO:0006996//organelle organization;GO:0042981//regulation of apoptotic process;GO:0050789//regulation of biological process;GO:00…
XM_014476735	0	39.1867	0.001	4.77	12.2198	0.0160953	0.736689	no	EIF3M	PREDICTED: Bos mutus eukaryotic translation initiation factor 3, subunit M (EIF3M), transcript variant X2, mRNA	-	-	-	-	-	-	-
XP_014333432	0	19.0567	0.001	4.68667	12.1943	0.01173	0.64761	no	RANGRF	PREDICTED: ran guanine nucleotide release factor isoform X1 [Bos taurus]	-	-	-	-	GO:0043231//intracellular membrane-bounded organelle;GO:0044444//cytoplasmic part;GO:0044428//nuclear part;GO:0098590//plasma membrane region;GO:0016020//membrane;GO:0005911//cell-cell junction;GO:0044425//membrane part;GO:0005623//cell;GO:0044459//plasma membrane part;GO:0043226//organelle;GO:0098589//membrane region;GO:0012505//endomembrane system;GO:0098857//membrane microdomain;GO:0044446//in…	GO:0016247//channel regulator activity;GO:0051020//GTPase binding;GO:0005515//protein binding;GO:0019899//enzyme binding;GO:0017016//Ras GTPase binding;GO:0031267//small GTPase binding;GO:0005088//Ras guanyl-nucleotide exchange factor activity;GO:0022892//substrate-specific transporter activity;GO:0005215//transporter activity;GO:0005488//binding;GO:0005085//guanyl-nucleotide exchange factor acti…	GO:0043269//regulation of ion transport;GO:0022898//regulation of transmembrane transporter activity;GO:0016192//vesicle-mediated transport;GO:0032412//regulation of ion transmembrane transporter activity;GO:0009987//cellular process;GO:0034394//protein localization to cell surface;GO:0072659//protein localization to plasma membrane;GO:0043087//regulation of GTPase activity;GO:0008104//protein lo…
XP_005892875	0	107.45	0.001	4.64333	12.1809	0.00401428	0.392264	no	LRWD1	PREDICTED: leucine-rich repeat and WD repeat-containing protein 1 [Bos mutus]	-	-	-	-	GO:0000781//chromosome, telomeric region;GO:0044446//intracellular organelle part;GO:0000775//chromosome, centromeric region;GO:0044464//cell part;GO:0043231//intracellular membrane-bounded organelle;GO:0044422//organelle part;GO:0005623//cell;GO:0098687//chromosomal region;GO:0005622//intracellular;GO:0044424//intracellular part;GO:0043226//organelle;GO:0043229//intracellular organelle;GO:000080…	GO:0042393//histone binding;GO:0000166//nucleotide binding;GO:1901363//heterocyclic compound binding;GO:0005488//binding;GO:0036094//small molecule binding;GO:0005515//protein binding;GO:0097159//organic cyclic compound binding;GO:1901265//nucleoside phosphate binding	GO:0051276//chromosome organization;GO:0051179//localization;GO:0072594//establishment of protein localization to organelle;GO:0009987//cellular process;GO:0033365//protein localization to organelle;GO:0008104//protein localization;GO:0051234//establishment of localization;GO:0045184//establishment of protein localization;GO:0070727//cellular macromolecule localization;GO:0006996//organelle organ…
XP_005911903	0	72.8033	0.001	4.64333	12.1809	0.00708674	0.504227	no	SOCS7	PREDICTED: LOW QUALITY PROTEIN: suppressor of cytokine signaling 7, partial [Bos mutus]	Organismal Systems;Environmental Information Processing	Signal transduction;Endocrine system	ko04630//Jak-STAT signaling pathway;ko04917//Prolactin signaling pathway	K04699	-	-	-
XP_005909843	0	34.21	0.001	4.59667	12.1664	0.0172687	0.75356	no	USE1	vesicle transport protein USE1 [Bos taurus]	Genetic Information Processing	Folding, sorting and degradation	ko04130//SNARE interactions in vesicular transport	K08507	GO:0044425//membrane part;GO:0031224//intrinsic component of membrane;GO:0016020//membrane	-	-
Unigene009697	0	17.6667	0.001	4.56667	12.1569	0.0402734	1	no	Unigene009697	CaiB/baiF, partial [Larimichthys crocea]	-	-	-	-	-	-	-
XP_005889701	0	317.58	0.001	4.54333	12.1495	7.22e-06	0.0100429	up	TNS1	PREDICTED: tensin-1 isoform X2 [Bos mutus]	-	-	-	-	GO:0043228//non-membrane-bounded organelle;GO:0043232//intracellular non-membrane-bounded organelle;GO:0043229//intracellular organelle;GO:0005623//cell;GO:0043226//organelle;GO:0005622//intracellular;GO:0030054//cell junction;GO:0044424//intracellular part;GO:0044464//cell part	GO:1901363//heterocyclic compound binding;GO:0008092//cytoskeletal protein binding;GO:0003723//RNA binding;GO:0003676//nucleic acid binding;GO:0097159//organic cyclic compound binding;GO:0005515//protein binding;GO:0005488//binding	GO:0022607//cellular component assembly;GO:0071840//cellular component organization or biogenesis;GO:0034329//cell junction assembly;GO:0016477//cell migration;GO:0009987//cellular process;GO:0044085//cellular component biogenesis;GO:0044763//single-organism cellular process;GO:0051179//localization;GO:0044699//single-organism process;GO:0016043//cellular component organization;GO:0001667//ameboi…
XP_014336060	0.00333333	24.5467	0.001	4.52333	12.1432	0.0274488	0.880867	no	YWHAE	PREDICTED: 14-3-3 protein epsilon isoform X2 [Geospiza fortis]	Cellular Processes	Cell growth and death	ko04114//Oocyte meiosis;ko04110//Cell cycle	K06630	GO:0097708//intracellular vesicle;GO:0030054//cell junction;GO:0005622//intracellular;GO:0005576//extracellular region;GO:0005737//cytoplasm;GO:0031982//vesicle;GO:0044464//cell part;GO:0016023//cytoplasmic, membrane-bounded vesicle;GO:0043227//membrane-bounded organelle;GO:0031988//membrane-bounded vesicle;GO:0070161//anchoring junction;GO:0043230//extracellular organelle;GO:0043229//intracellul…	GO:0005515//protein binding;GO:0032403//protein complex binding;GO:0023023//MHC protein complex binding;GO:0043168//anion binding;GO:0016597//amino acid binding;GO:0019899//enzyme binding;GO:0016247//channel regulator activity;GO:0046983//protein dimerization activity;GO:0098772//molecular function regulator;GO:0043167//ion binding;GO:0005488//binding;GO:0097159//organic cyclic compound binding;G…	GO:0032501//multicellular organismal process;GO:0034762//regulation of transmembrane transport;GO:0030900//forebrain development;GO:0035303//regulation of dephosphorylation;GO:0050794//regulation of cellular process;GO:0043269//regulation of ion transport;GO:0045936//negative regulation of phosphate metabolic process;GO:0006928//movement of cell or subcellular component;GO:0060255//regulation of …
XM_005906452	0	132.34	0.001	4.44667	12.1185	0.00290106	0.334141	no	LOC102276028	PREDICTED: Bos mutus partitioning defective 3 homolog (LOC102276028), transcript variant X3, mRNA	Environmental Information Processing;Organismal Systems;Cellular Processes	Signaling molecules and interaction;Immune system;Cellular commiunity;Signal transduction;Transport and catabolism	ko04144//Endocytosis;ko04080//Neuroactive ligand-receptor interaction;ko04015//Rap1 signaling pathway;ko04062//Chemokine signaling pathway;ko04390//Hippo signaling pathway;ko04530//Tight junction;ko04520//Adherens junction	K04237	GO:0043296//apical junction complex;GO:0030054//cell junction;GO:0005911//cell-cell junction	-	-
XP_005891865	0	16.2067	0.001	4.43667	12.1153	0.0131074	0.676014	no	PSMA6	proteasome subunit alpha type-6 isoform b [Homo sapiens]	Genetic Information Processing	Folding, sorting and degradation	ko03050//Proteasome	K02730	GO:0005622//intracellular;GO:1902494//catalytic complex;GO:0005623//cell;GO:0036464//cytoplasmic ribonucleoprotein granule;GO:0043229//intracellular organelle;GO:0034399//nuclear periphery;GO:0044444//cytoplasmic part;GO:0044424//intracellular part;GO:0005576//extracellular region;GO:1905369//endopeptidase complex;GO:0044464//cell part;GO:1990904//ribonucleoprotein complex;GO:0044422//organelle p…	GO:0005488//binding;GO:0043168//anion binding;GO:0008233//peptidase activity;GO:0043167//ion binding;GO:0016787//hydrolase activity;GO:0003676//nucleic acid binding;GO:0097159//organic cyclic compound binding;GO:0004175//endopeptidase activity;GO:0005515//protein binding;GO:0003824//catalytic activity;GO:0070011//peptidase activity, acting on L-amino acid peptides;GO:0008134//transcription factor…	GO:0009888//tissue development;GO:0002682//regulation of immune system process;GO:0010648//negative regulation of cell communication;GO:1901987//regulation of cell cycle phase transition;GO:0006952//defense response;GO:0071345//cellular response to cytokine stimulus;GO:0002684//positive regulation of immune system process;GO:0045089//positive regulation of innate immune response;GO:0060255//regul…
XP_005891866	0	16.2067	0.001	4.43667	12.1153	0.0131095	0.676014	no	PSMA6	proteasome subunit alpha type-6 isoform b [Homo sapiens]	Genetic Information Processing	Folding, sorting and degradation	ko03050//Proteasome	K02730	GO:0005622//intracellular;GO:0030529//intracellular ribonucleoprotein complex;GO:0031981//nuclear lumen;GO:0044444//cytoplasmic part;GO:0005576//extracellular region;GO:0031982//vesicle;GO:0043232//intracellular non-membrane-bounded organelle;GO:1905369//endopeptidase complex;GO:0036464//cytoplasmic ribonucleoprotein granule;GO:1903561//extracellular vesicle;GO:0043233//organelle lumen;GO:1990904…	GO:0043168//anion binding;GO:0005488//binding;GO:1901363//heterocyclic compound binding;GO:0004175//endopeptidase activity;GO:0008233//peptidase activity;GO:0005515//protein binding;GO:0097159//organic cyclic compound binding;GO:0043167//ion binding;GO:0016787//hydrolase activity;GO:0003824//catalytic activity;GO:0003676//nucleic acid binding;GO:0070011//peptidase activity, acting on L-amino acid…	GO:0043436//oxoacid metabolic process;GO:0080090//regulation of primary metabolic process;GO:0048519//negative regulation of biological process;GO:0002757//immune response-activating signal transduction;GO:0044238//primary metabolic process;GO:0009967//positive regulation of signal transduction;GO:0038093//Fc receptor signaling pathway;GO:0016567//protein ubiquitination;GO:0002684//positive regul…
XP_005911397	0	33.9567	0.001	4.42	12.1098	0.0189338	0.780152	no	SLC2A4RG	PREDICTED: SLC2A4 regulator, partial [Bos mutus]	-	-	-	-	-	GO:0005488//binding;GO:0043167//ion binding;GO:0043169//cation binding	-
Unigene033630	0	12	0.001	4.39667	12.1022	0.0122928	0.659427	no	Unigene033630	PREDICTED: ubiquitin carboxyl-terminal hydrolase 31 isoform X2 [Ovis aries musimon]	-	-	-	-	-	-	-
XP_005893464	0	23.48	0.001	4.39333	12.1011	0.0293072	0.90612	no	ROPN1	PREDICTED: ropporin-1-like [Bos mutus]	-	-	-	-	GO:0043226//organelle;GO:0042995//cell projection;GO:0044464//cell part;GO:0005622//intracellular;GO:0031514//motile cilium;GO:0005623//cell;GO:0097223//sperm part;GO:0036126//sperm flagellum;GO:0005929//cilium;GO:0044424//intracellular part	-	GO:0051641//cellular localization;GO:0051674//localization of cell;GO:0033365//protein localization to organelle;GO:0070727//cellular macromolecule localization;GO:0044763//single-organism cellular process;GO:0016043//cellular component organization;GO:0006928//movement of cell or subcellular component;GO:0071840//cellular component organization or biogenesis;GO:0044699//single-organism process;G…
XP_014332948	0	23.48	0.001	4.39333	12.1011	0.0293098	0.90612	no	ROPN1	PREDICTED: ropporin-1-like [Bos mutus]	-	-	-	-	GO:0044424//intracellular part;GO:0005623//cell;GO:0031514//motile cilium;GO:0005622//intracellular;GO:0044464//cell part;GO:0036126//sperm flagellum;GO:0097223//sperm part;GO:0043226//organelle;GO:0042995//cell projection;GO:0005929//cilium	-	GO:0051674//localization of cell;GO:0003006//developmental process involved in reproduction;GO:0033036//macromolecule localization;GO:0032502//developmental process;GO:0034613//cellular protein localization;GO:0044763//single-organism cellular process;GO:0040011//locomotion;GO:0009987//cellular process;GO:0022414//reproductive process;GO:0071840//cellular component organization or biogenesis;GO:0…
XP_005894755	0	86.01	0.001	4.38	12.0967	0.000740266	0.159731	no	FNBP1L	PREDICTED: formin-binding protein 1-like isoform X3 [Bos taurus]	-	-	-	-	-	-	-
XP_014331842	0	45.3133	0.001	4.36333	12.0912	0.0135117	0.682624	no	WNT6	PREDICTED: protein Wnt-6, partial [Bos mutus]	Cellular Processes;Organismal Systems;Environmental Information Processing	Cellular commiunity;Signal transduction;Endocrine system	ko04390//Hippo signaling pathway;ko04550//Signaling pathways regulating pluripotency of stem cells;ko04310//Wnt signaling pathway;ko04916//Melanogenesis;ko04340//Hedgehog signaling pathway	K00445	-	-	-
XP_005887358	0	30.4467	0.001	4.28333	12.0645	0.0219458	0.819744	no	MFAP4	microfibril-associated glycoprotein 4 precursor [Bos taurus]	-	-	-	-	GO:0031982//vesicle;GO:0005578//proteinaceous extracellular matrix;GO:0043205//fibril;GO:0044421//extracellular region part;GO:0044420//extracellular matrix component;GO:0043226//organelle;GO:0043227//membrane-bounded organelle;GO:0043230//extracellular organelle;GO:1903561//extracellular vesicle;GO:0031012//extracellular matrix;GO:0005576//extracellular region	GO:0005488//binding	GO:0009411//response to UV;GO:0044085//cellular component biogenesis;GO:0044707//single-multicellular organism process;GO:0008152//metabolic process;GO:0050896//response to stimulus;GO:0022610//biological adhesion;GO:0009628//response to abiotic stimulus;GO:0044763//single-organism cellular process;GO:0016043//cellular component organization;GO:0043062//extracellular structure organization;GO:004…
Unigene041432	0	4.33333	0.001	4.25333	12.0544	0.0354962	0.968901	no	-	-	-	-	-	-	-	-	-
XP_005893655	0	13.5067	0.001	4.24	12.0498	0.00277085	0.325513	no	SNRNP27	U4/U6.U5 small nuclear ribonucleoprotein 27 kDa protein [Homo sapiens]	Genetic Information Processing	Transcription	ko03040//Spliceosome	K12846	-	-	-
XM_005898045	0	75.0333	0.001	4.20667	12.0385	0.00677276	0.49974	no	SMARCE1	PREDICTED: Bos mutus SWI/SNF related, matrix associated, actin dependent regulator of chromatin, subfamily e, member 1 (SMARCE1), transcript variant X3, mRNA	-	-	-	-	GO:0032991//macromolecular complex;GO:0044427//chromosomal part;GO:0044428//nuclear part;GO:0070603//SWI/SNF superfamily-type complex;GO:0043234//protein complex;GO:0090544//BAF-type complex;GO:0005634//nucleus;GO:0044424//intracellular part;GO:0043233//organelle lumen;GO:0043232//intracellular non-membrane-bounded organelle;GO:0005694//chromosome;GO:0043229//intracellular organelle;GO:0070013//i…	GO:0044877//macromolecular complex binding;GO:0016407//acetyltransferase activity;GO:0005488//binding;GO:0005515//protein binding;GO:0000977//RNA polymerase II regulatory region sequence-specific DNA binding;GO:0031490//chromatin DNA binding;GO:0003677//DNA binding;GO:1901363//heterocyclic compound binding;GO:0044212//transcription regulatory region DNA binding;GO:0001012//RNA polymerase II regul…	GO:0006725//cellular aromatic compound metabolic process;GO:0034645//cellular macromolecule biosynthetic process;GO:0044249//cellular biosynthetic process;GO:0071824//protein-DNA complex subunit organization;GO:0006807//nitrogen compound metabolic process;GO:0009987//cellular process;GO:0046483//heterocycle metabolic process;GO:0034641//cellular nitrogen compound metabolic process;GO:0044260//cel…
Unigene029554	0	4	0.001	4.17667	12.0281	0.0405244	1	no	-	-	-	-	-	-	-	-	-
XM_005895205	0	45.87	0.001	4.07667	11.9932	0.013292	0.677437	no	ATP6V1E1	PREDICTED: Bos mutus ATPase, H+ transporting, lysosomal 31kDa, V1 subunit E1 (ATP6V1E1), transcript variant X3, mRNA	Metabolism;Organismal Systems;Cellular Processes	Transport and catabolism;Nervous system;Excretory system;Energy metabolism	ko04145//Phagosome;ko00190//Oxidative phosphorylation;ko04721//Synaptic vesicle cycle;ko04966//Collecting duct acid secretion	K02150	GO:0032991//macromolecular complex;GO:0005623//cell;GO:0005737//cytoplasm;GO:0042995//cell projection;GO:0005622//intracellular;GO:0005764//lysosome;GO:0044464//cell part;GO:0044444//cytoplasmic part;GO:0071944//cell periphery;GO:0098796//membrane protein complex;GO:0043234//protein complex;GO:0043230//extracellular organelle;GO:0000323//lytic vacuole;GO:0043229//intracellular organelle;GO:001602…	GO:0016787//hydrolase activity;GO:0042625//ATPase coupled ion transmembrane transporter activity;GO:0016462//pyrophosphatase activity;GO:0042626//ATPase activity, coupled to transmembrane movement of substances;GO:0022853//active ion transmembrane transporter activity;GO:0015077//monovalent inorganic cation transmembrane transporter activity;GO:0043492//ATPase activity, coupled to movement of sub…	GO:0006812//cation transport;GO:0098660//inorganic ion transmembrane transport;GO:0055067//monovalent inorganic cation homeostasis;GO:0009987//cellular process;GO:0015992//proton transport;GO:0098662//inorganic cation transmembrane transport;GO:0033036//macromolecule localization;GO:0030003//cellular cation homeostasis;GO:0055082//cellular chemical homeostasis;GO:0051234//establishment of localiz…
XP_005911990	0	151.28	0.001	4.01	11.9694	7.77e-05	0.0410896	up	PPP1R13B	PREDICTED: LOW QUALITY PROTEIN: protein phosphatase 1, regulatory subunit 13B, partial [Bos mutus]	-	-	-	-	-	-	-
XP_005907304	0	29.76	0.001	4.00333	11.967	0.022545	0.830201	no	TMEM97	Transmembrane protein 97, partial [Bos mutus]	-	-	-	-	GO:0012505//endomembrane system;GO:0031975//envelope;GO:0005737//cytoplasm;GO:0044446//intracellular organelle part;GO:0031967//organelle envelope;GO:0000323//lytic vacuole;GO:0005783//endoplasmic reticulum;GO:0005773//vacuole;GO:0016020//membrane;GO:0044444//cytoplasmic part;GO:0005635//nuclear envelope;GO:0043229//intracellular organelle;GO:0044428//nuclear part;GO:0005623//cell;GO:0031224//int…	-	GO:0055092//sterol homeostasis;GO:0048878//chemical homeostasis;GO:0065008//regulation of biological quality;GO:0042592//homeostatic process;GO:0065007//biological regulation;GO:0055088//lipid homeostasis
XP_014338900	0	130.43	0.001	3.96333	11.9525	0.000232207	0.0828372	no	LENG8	PREDICTED: LOW QUALITY PROTEIN: leukocyte receptor cluster member 8 homolog [Bos mutus]	-	-	-	-	-	-	-
XP_005894493	0	93.45	0.001	3.94333	11.9452	6.01e-06	0.00882995	up	ADD1	PREDICTED: alpha-adducin isoform X3 [Bos mutus]	-	-	-	-	GO:0005623//cell;GO:0031974//membrane-enclosed lumen;GO:0043231//intracellular membrane-bounded organelle;GO:0043227//membrane-bounded organelle;GO:0005634//nucleus;GO:0044428//nuclear part;GO:0005924//cell-substrate adherens junction;GO:0016020//membrane;GO:0044464//cell part;GO:0044424//intracellular part;GO:0043228//non-membrane-bounded organelle;GO:0070161//anchoring junction;GO:0043233//orga…	GO:1901363//heterocyclic compound binding;GO:0003676//nucleic acid binding;GO:0046983//protein dimerization activity;GO:0003779//actin binding;GO:0008092//cytoskeletal protein binding;GO:0005515//protein binding;GO:0003723//RNA binding;GO:0005488//binding;GO:0097159//organic cyclic compound binding	GO:0048871//multicellular organismal homeostasis;GO:0048534//hematopoietic or lymphoid organ development;GO:0016043//cellular component organization;GO:0051494//negative regulation of cytoskeleton organization;GO:0030097//hemopoiesis;GO:0032501//multicellular organismal process;GO:0030837//negative regulation of actin filament polymerization;GO:0030154//cell differentiation;GO:0043393//regulation…
XP_005887575	0	70.0367	0.001	3.93667	11.9428	1.51e-05	0.0152383	up	TBC1D10A	PREDICTED: TBC1 domain family member 10A isoform X2 [Bos mutus]	-	-	-	-	-	-	-
XP_014338727	0	80.1	0.001	3.92667	11.9391	1.32e-05	0.0140972	up	NARS	PREDICTED: asparagine--tRNA ligase, cytoplasmic [Bos mutus]	Genetic Information Processing	Translation	ko00970//Aminoacyl-tRNA biosynthesis	K01893	GO:0005576//extracellular region;GO:0043231//intracellular membrane-bounded organelle;GO:1903561//extracellular vesicle;GO:0043229//intracellular organelle;GO:0044421//extracellular region part;GO:0005623//cell;GO:0043226//organelle;GO:0043227//membrane-bounded organelle;GO:0031982//vesicle;GO:0044464//cell part;GO:0005622//intracellular;GO:0043230//extracellular organelle;GO:0044424//intracellul…	GO:0005488//binding;GO:0032550//purine ribonucleoside binding;GO:0016874//ligase activity;GO:0001882//nucleoside binding;GO:0097367//carbohydrate derivative binding;GO:0036094//small molecule binding;GO:0016875//ligase activity, forming carbon-oxygen bonds;GO:0097159//organic cyclic compound binding;GO:0001883//purine nucleoside binding;GO:0016876//ligase activity, forming aminoacyl-tRNA and rela…	GO:0044249//cellular biosynthetic process;GO:0016070//RNA metabolic process;GO:0034660//ncRNA metabolic process;GO:0010467//gene expression;GO:0044267//cellular protein metabolic process;GO:0006139//nucleobase-containing compound metabolic process;GO:0043604//amide biosynthetic process;GO:0043170//macromolecule metabolic process;GO:0044281//small molecule metabolic process;GO:0090304//nucleic aci…
XP_005904188	0	16.37	0.001	3.9	11.9293	0.00739518	0.515587	no	LOC102283046	PREDICTED: major allergen Equ c 1-like [Bos mutus]	-	-	-	-	-	GO:0005488//binding;GO:0005549//odorant binding	GO:0051234//establishment of localization;GO:0051179//localization
XP_005899976	0	55.0833	0.001	3.85667	11.9131	0.0103796	0.614467	no	GOT2	PREDICTED: aspartate aminotransferase, mitochondrial isoform X1 [Bos mutus]	Organismal Systems;Metabolism	Global and Overview;Amino acid metabolism;Digestive system	ko01200//Carbon metabolism;ko01230//Biosynthesis of amino acids;ko00330//Arginine and proline metabolism;ko00270//Cysteine and methionine metabolism;ko04975//Fat digestion and absorption;ko00250//Alanine, aspartate and glutamate metabolism;ko00350//Tyrosine metabolism;ko01210//2-Oxocarboxylic acid metabolism;ko00220//Arginine biosynthesis;ko00360//Phenylalanine metabolism;ko00400//Phenylalanine, …	K14455	-	-	-
XP_005895890	0	79.0833	0.001	3.85333	11.9119	0.00631579	0.485005	no	ELF2	ETS-related transcription factor Elf-2 [Bos taurus]	-	-	-	-	-	-	-
Unigene026848	0	13.6667	0.001	3.82	11.8994	0.0120079	0.655721	no	Unigene026848	basic proline-rich protein precursor [Sus scrofa]	-	-	-	-	-	GO:0005515//protein binding;GO:0005488//binding	GO:0030029//actin filament-based process;GO:0044763//single-organism cellular process;GO:0009987//cellular process;GO:0044699//single-organism process
XP_005889918	0	186.763	0.001	3.81	11.8956	6.44e-05	0.0382715	up	CLASP1	PREDICTED: CLIP-associating protein 1 isoform X4 [Bos mutus]	-	-	-	-	GO:0005856//cytoskeleton;GO:0005924//cell-substrate adherens junction;GO:0044421//extracellular region part;GO:0099081//supramolecular polymer;GO:0005876//spindle microtubule;GO:0043231//intracellular membrane-bounded organelle;GO:0098687//chromosomal region;GO:0043229//intracellular organelle;GO:1903561//extracellular vesicle;GO:0005622//intracellular;GO:0044430//cytoskeletal part;GO:0005694//ch…	GO:0005488//binding;GO:0008017//microtubule binding;GO:0005515//protein binding;GO:0001948//glycoprotein binding;GO:0015631//tubulin binding;GO:0097367//carbohydrate derivative binding;GO:0008092//cytoskeletal protein binding	GO:0000280//nuclear division;GO:0009888//tissue development;GO:0010715//regulation of extracellular matrix disassembly;GO:0044765//single-organism transport;GO:0051239//regulation of multicellular organismal process;GO:0051179//localization;GO:0010810//regulation of cell-substrate adhesion;GO:0044707//single-multicellular organism process;GO:0044699//single-organism process;GO:0048523//negative r…
XM_005889543	0	18.21	0.001	3.71667	11.8598	0.0153893	0.720825	no	GULP1	PREDICTED: Bos mutus GULP, engulfment adaptor PTB domain containing 1 (GULP1), transcript variant X3, mRNA	-	-	-	-	GO:0044464//cell part;GO:0005623//cell;GO:0044424//intracellular part;GO:0005622//intracellular	-	GO:0007154//cell communication;GO:1902578//single-organism localization;GO:0044763//single-organism cellular process;GO:0044765//single-organism transport;GO:0009987//cellular process;GO:0051234//establishment of localization;GO:0006810//transport;GO:0044699//single-organism process;GO:0016192//vesicle-mediated transport;GO:0012501//programmed cell death;GO:0008219//cell death;GO:0033036//macromo…
XP_005889605	0	18.21	0.001	3.71667	11.8598	0.0153941	0.720825	no	GULP1	PREDICTED: PTB domain-containing engulfment adapter protein 1 isoform X3 [Bos mutus]	-	-	-	-	GO:0005622//intracellular;GO:0044424//intracellular part;GO:0044464//cell part;GO:0005623//cell	-	GO:0008219//cell death;GO:0012501//programmed cell death;GO:0044763//single-organism cellular process;GO:0033036//macromolecule localization;GO:0016192//vesicle-mediated transport;GO:1902578//single-organism localization;GO:0006810//transport;GO:0051179//localization;GO:0010876//lipid localization;GO:0044699//single-organism process;GO:0006897//endocytosis;GO:0006909//phagocytosis;GO:0051234//est…
XM_005894205	0	44.2367	0.001	3.66333	11.8389	0.0139151	0.688965	no	AKR1A1	PREDICTED: Bos mutus aldo-keto reductase family 1, member A1 (aldehyde reductase) (AKR1A1), transcript variant X2, mRNA	Metabolism	Lipid metabolism;Carbohydrate metabolism;Global and Overview	ko00010//Glycolysis / Gluconeogenesis;ko00561//Glycerolipid metabolism;ko00040//Pentose and glucuronate interconversions;ko01220//Degradation of aromatic compounds	K00002	GO:0044444//cytoplasmic part;GO:0005576//extracellular region;GO:0005622//intracellular;GO:0005623//cell;GO:0005886//plasma membrane;GO:0043226//organelle;GO:0044464//cell part;GO:0044424//intracellular part;GO:0016020//membrane;GO:1903561//extracellular vesicle;GO:0043227//membrane-bounded organelle;GO:0031982//vesicle;GO:0005737//cytoplasm;GO:0043230//extracellular organelle;GO:0044421//extrace…	GO:0003824//catalytic activity;GO:0016616//oxidoreductase activity, acting on the CH-OH group of donors, NAD or NADP as acceptor;GO:0016614//oxidoreductase activity, acting on CH-OH group of donors;GO:0004033//aldo-keto reductase (NADP) activity;GO:0016491//oxidoreductase activity	GO:0006766//vitamin metabolic process;GO:0006767//water-soluble vitamin metabolic process;GO:0009987//cellular process;GO:0044281//small molecule metabolic process;GO:0019585//glucuronate metabolic process;GO:0044699//single-organism process;GO:0006064//glucuronate catabolic process;GO:0044710//single-organism metabolic process;GO:0044248//cellular catabolic process;GO:1901575//organic substance …
XP_005909936	0	52.77	0.001	3.66	11.8376	0.00995731	0.599537	no	PPP1R32	PREDICTED: protein phosphatase 1 regulatory subunit 32 [Bos mutus]	-	-	-	-	-	GO:0019899//enzyme binding;GO:0005488//binding;GO:0005515//protein binding	-
XP_005898754	0	51.91	0.001	3.64	11.8297	0.0101116	0.606065	no	FDPS	PREDICTED: farnesyl pyrophosphate synthase isoform X1 [Bos mutus]	Metabolism	Metabolism of terpenoids and polyketides	ko00900//Terpenoid backbone biosynthesis	K00787	-	-	-
XP_014331987	0.01	104.31	0.001	3.63333	11.8271	0.00420636	0.403574	no	LOC102278583	PREDICTED: serine/threonine-protein phosphatase 2A 65 kDa regulatory subunit A alpha isoform-like [Bos mutus]	Environmental Information Processing;Genetic Information Processing;Organismal Systems;Cellular Processes	Cellular commiunity;Translation;Circulatory system;Nervous system;Signal transduction;Cell growth and death	ko04151//PI3K-Akt signaling pathway;ko04261//Adrenergic signaling in cardiomyocytes;ko04390//Hippo signaling pathway;ko04728//Dopaminergic synapse;ko04530//Tight junction;ko04152//AMPK signaling pathway;ko04114//Oocyte meiosis;ko04071//Sphingolipid signaling pathway;ko03015//mRNA surveillance pathway;ko04350//TGF-beta signaling pathway;ko04730//Long-term depression	K03456	GO:0044446//intracellular organelle part;GO:0044464//cell part;GO:0044427//chromosomal part;GO:0043234//protein complex;GO:0005737//cytoplasm;GO:0044424//intracellular part;GO:0043228//non-membrane-bounded organelle;GO:0005622//intracellular;GO:1902494//catalytic complex;GO:0044422//organelle part;GO:0044444//cytoplasmic part;GO:0005623//cell;GO:0032991//macromolecular complex;GO:0043230//extrace…	GO:0016791//phosphatase activity;GO:0042578//phosphoric ester hydrolase activity;GO:0046983//protein dimerization activity;GO:0004721//phosphoprotein phosphatase activity;GO:0019208//phosphatase regulator activity;GO:0098772//molecular function regulator;GO:0016788//hydrolase activity, acting on ester bonds;GO:0030234//enzyme regulator activity;GO:0003824//catalytic activity;GO:0016787//hydrolase…	GO:0008219//cell death;GO:0009987//cellular process;GO:0045132//meiotic chromosome segregation;GO:0051726//regulation of cell cycle;GO:0043412//macromolecule modification;GO:0008152//metabolic process;GO:0006996//organelle organization;GO:0000070//mitotic sister chromatid segregation;GO:0051716//cellular response to stimulus;GO:0000819//sister chromatid segregation;GO:0038034//signal transduction…
XP_005902114	0	30.9367	0.001	3.60333	11.8151	0.0211985	0.803977	no	TMEM185B	PREDICTED: transmembrane protein 185B isoform X2 [Bos mutus]	-	-	-	-	-	-	-
XP_005890452	0	75.6167	0.001	3.59	11.8098	0.001125	0.201252	no	SP2	PREDICTED: transcription factor Sp2 [Bos mutus]	-	-	-	-	GO:0044464//cell part;GO:0043229//intracellular organelle;GO:0044424//intracellular part;GO:0043231//intracellular membrane-bounded organelle;GO:0043226//organelle;GO:0005623//cell;GO:0043227//membrane-bounded organelle;GO:0005622//intracellular	GO:0043169//cation binding;GO:1901363//heterocyclic compound binding;GO:0005488//binding;GO:0003676//nucleic acid binding;GO:0005515//protein binding;GO:0019899//enzyme binding;GO:0043167//ion binding;GO:0097159//organic cyclic compound binding	GO:0034654//nucleobase-containing compound biosynthetic process;GO:1901576//organic substance biosynthetic process;GO:0044238//primary metabolic process;GO:0010467//gene expression;GO:0018130//heterocycle biosynthetic process;GO:0071704//organic substance metabolic process;GO:0016070//RNA metabolic process;GO:0034641//cellular nitrogen compound metabolic process;GO:0044707//single-multicellular o…
XP_005899926	0	93.1967	0.001	3.55333	11.795	0.00497562	0.434053	no	BBS2	PREDICTED: Bardet-Biedl syndrome 2 protein [Bos mutus]	-	-	-	-	-	-	-
XP_005891208	0	56.9133	0.001	3.53333	11.7868	0.0020141	0.283637	no	SLC43A3	PREDICTED: solute carrier family 43 member 3 [Bos mutus]	-	-	-	-	GO:0016020//membrane;GO:0044425//membrane part;GO:0031224//intrinsic component of membrane	-	GO:0044699//single-organism process;GO:0009987//cellular process;GO:0044763//single-organism cellular process
XP_005909496	0	100.697	0.001	3.5	11.7731	0.000286465	0.0916415	no	ACO2	PREDICTED: aconitate hydratase, mitochondrial [Bos mutus]	Metabolism	Carbohydrate metabolism;Global and Overview	ko01200//Carbon metabolism;ko01230//Biosynthesis of amino acids;ko00020//Citrate cycle (TCA cycle);ko00630//Glyoxylate and dicarboxylate metabolism;ko01210//2-Oxocarboxylic acid metabolism	K01681	GO:0043226//organelle;GO:0044424//intracellular part;GO:0005622//intracellular;GO:0043231//intracellular membrane-bounded organelle;GO:0044464//cell part;GO:0043229//intracellular organelle;GO:0005623//cell;GO:0043227//membrane-bounded organelle	GO:0051540//metal cluster binding;GO:0005488//binding;GO:0046914//transition metal ion binding;GO:0003824//catalytic activity;GO:0016836//hydro-lyase activity;GO:0051536//iron-sulfur cluster binding;GO:0016835//carbon-oxygen lyase activity;GO:0016829//lyase activity;GO:0043169//cation binding;GO:0043167//ion binding;GO:0046872//metal ion binding	GO:0044237//cellular metabolic process;GO:0006082//organic acid metabolic process;GO:0009987//cellular process;GO:0044763//single-organism cellular process;GO:0043436//oxoacid metabolic process;GO:0044699//single-organism process;GO:0044710//single-organism metabolic process;GO:0072350//tricarboxylic acid metabolic process;GO:0008152//metabolic process;GO:0019752//carboxylic acid metabolic proces…
XP_014338274	0	61.7	0.001	3.48333	11.7663	0.000950087	0.18067	no	CPSF3L	PREDICTED: integrator complex subunit 11 isoform X3 [Capra hircus]	-	-	-	-	GO:0043226//organelle;GO:0044422//organelle part;GO:0005615//extracellular space;GO:0044421//extracellular region part;GO:0031974//membrane-enclosed lumen;GO:0070013//intracellular organelle lumen;GO:0043233//organelle lumen;GO:0044451//nucleoplasm part;GO:0031981//nuclear lumen;GO:0030880//RNA polymerase complex;GO:0043231//intracellular membrane-bounded organelle;GO:0005654//nucleoplasm;GO:1902…	GO:0003824//catalytic activity;GO:0005488//binding	GO:0009058//biosynthetic process;GO:0044238//primary metabolic process;GO:0044249//cellular biosynthetic process;GO:0018130//heterocycle biosynthetic process;GO:0044260//cellular macromolecule metabolic process;GO:1901576//organic substance biosynthetic process;GO:0010467//gene expression;GO:0097659//nucleic acid-templated transcription;GO:0009987//cellular process;GO:0019438//aromatic compound b…
XP_014331964	0	213.31	0.001	3.45	11.7524	3.16e-05	0.0232065	up	IQGAP2	Ras GTPase-activating-like protein IQGAP2, partial [Bos mutus]	Cellular Processes	Cell motility	ko04810//Regulation of actin cytoskeleton	K05767	GO:0043227//membrane-bounded organelle;GO:0098858//actin-based cell projection;GO:0099512//supramolecular fiber;GO:0005856//cytoskeleton;GO:0043230//extracellular organelle;GO:0005884//actin filament;GO:0044424//intracellular part;GO:0044430//cytoskeletal part;GO:0099513//polymeric cytoskeletal fiber;GO:0015629//actin cytoskeleton;GO:1903561//extracellular vesicle;GO:0005622//intracellular;GO:003…	GO:0005488//binding;GO:0005515//protein binding;GO:0044877//macromolecular complex binding;GO:0005543//phospholipid binding;GO:1901981//phosphatidylinositol phosphate binding;GO:0017048//Rho GTPase binding;GO:0008092//cytoskeletal protein binding;GO:0003779//actin binding;GO:0017016//Ras GTPase binding;GO:0051020//GTPase binding;GO:0035091//phosphatidylinositol binding;GO:0008289//lipid binding;G…	GO:0033043//regulation of organelle organization;GO:0030029//actin filament-based process;GO:0043254//regulation of protein complex assembly;GO:0030833//regulation of actin filament polymerization;GO:0030838//positive regulation of actin filament polymerization;GO:0051495//positive regulation of cytoskeleton organization;GO:0051128//regulation of cellular component organization;GO:0065007//biolog…
Unigene015661	0	25.5833	0.001	3.41333	11.737	0.0263128	0.870557	no	Unigene015661	Cold-inducible RNA-binding protein [Salmo salar]	-	-	-	-	-	GO:1901363//heterocyclic compound binding;GO:0097159//organic cyclic compound binding;GO:0005488//binding	-
XP_005887655	0	70.7133	0.001	3.40333	11.7327	0.0069803	0.502932	no	CCDC173	PREDICTED: coiled-coil domain-containing protein 173 [Bos mutus]	-	-	-	-	-	-	-
XP_005891641	0	44.53	0.001	3.39	11.7271	0.0125035	0.662984	no	FAM71D	PREDICTED: protein FAM71D [Bos mutus]	-	-	-	-	-	-	-
XM_005887518	0.0533333	103.427	0.001	3.38667	11.7257	5.51e-06	0.00839183	up	SEC14L2	PREDICTED: Bos mutus SEC14-like lipid binding 2 (SEC14L2), transcript variant X2, mRNA	-	-	-	-	GO:0043231//intracellular membrane-bounded organelle;GO:0031982//vesicle;GO:0005623//cell;GO:0043226//organelle;GO:0044421//extracellular region part;GO:0044464//cell part;GO:0016020//membrane;GO:0005576//extracellular region;GO:0043229//intracellular organelle;GO:0043227//membrane-bounded organelle;GO:0044424//intracellular part;GO:0044425//membrane part;GO:0031224//intrinsic component of membra…	GO:0008289//lipid binding;GO:0036094//small molecule binding;GO:0005488//binding;GO:0019842//vitamin binding	GO:0006694//steroid biosynthetic process;GO:0034645//cellular macromolecule biosynthetic process;GO:0009058//biosynthetic process;GO:0006695//cholesterol biosynthetic process;GO:0006139//nucleobase-containing compound metabolic process;GO:0008203//cholesterol metabolic process;GO:0010467//gene expression;GO:0044699//single-organism process;GO:0006066//alcohol metabolic process;GO:0016070//RNA met…
XM_014483657	0.0633333	216.517	0.00333333	11.25	11.7207	4.05e-05	0.0272847	up	LOC102264564	PREDICTED: Bos mutus chromosome unknown open reading frame, human C1orf43 (LOC102264564), transcript variant X2, mRNA	-	-	-	-	GO:0044425//membrane part;GO:0031224//intrinsic component of membrane;GO:0016020//membrane	GO:0003824//catalytic activity	GO:0044699//single-organism process;GO:0008152//metabolic process;GO:0044710//single-organism metabolic process
XP_005892478	0	53.4	0.001	3.36333	11.7157	0.0108914	0.627204	no	SLC7A5	Large neutral amino acids transporter small subunit 1, partial [Bos mutus]	-	-	-	-	-	-	-
XP_014339018	0	23.34	0.001	3.35667	11.7128	0.00637117	0.485517	no	LOC106701664	PREDICTED: helicase SKI2W-like isoform X1 [Bos taurus]	-	-	-	-	GO:0043234//protein complex;GO:0031981//nuclear lumen;GO:0005623//cell;GO:0032991//macromolecular complex;GO:0044446//intracellular organelle part;GO:0044428//nuclear part;GO:0031974//membrane-enclosed lumen;GO:0005622//intracellular;GO:0005634//nucleus;GO:0043233//organelle lumen;GO:0044464//cell part;GO:0043229//intracellular organelle;GO:0043226//organelle;GO:0070013//intracellular organelle l…	GO:0004386//helicase activity;GO:0032550//purine ribonucleoside binding;GO:0003724//RNA helicase activity;GO:0001883//purine nucleoside binding;GO:0005488//binding;GO:0017111//nucleoside-triphosphatase activity;GO:1901363//heterocyclic compound binding;GO:0036094//small molecule binding;GO:0003676//nucleic acid binding;GO:0016787//hydrolase activity;GO:0097367//carbohydrate derivative binding;GO:…	GO:0006725//cellular aromatic compound metabolic process;GO:0009987//cellular process;GO:0016070//RNA metabolic process;GO:0071704//organic substance metabolic process;GO:0044237//cellular metabolic process;GO:1901360//organic cyclic compound metabolic process;GO:0090304//nucleic acid metabolic process;GO:0043170//macromolecule metabolic process;GO:0044238//primary metabolic process;GO:0044260//c…
XM_005904516	0	84.9833	0.001	3.34	11.7056	0.00566797	0.467979	no	SETDB2	PREDICTED: Bos mutus SET domain, bifurcated 2 (SETDB2), mRNA	Metabolism	Amino acid metabolism	ko00310//Lysine degradation	K18494	GO:0005622//intracellular;GO:0044424//intracellular part;GO:0043226//organelle;GO:0043227//membrane-bounded organelle;GO:0005623//cell;GO:0043232//intracellular non-membrane-bounded organelle;GO:0043228//non-membrane-bounded organelle;GO:0044464//cell part;GO:0043229//intracellular organelle;GO:0043231//intracellular membrane-bounded organelle	GO:0008170//N-methyltransferase activity;GO:0008168//methyltransferase activity;GO:0008276//protein methyltransferase activity;GO:0018024//histone-lysine N-methyltransferase activity;GO:0046872//metal ion binding;GO:0003824//catalytic activity;GO:0016279//protein-lysine N-methyltransferase activity;GO:0042054//histone methyltransferase activity;GO:0016278//lysine N-methyltransferase activity;GO:0…	GO:0043170//macromolecule metabolic process;GO:0016043//cellular component organization;GO:0008213//protein alkylation;GO:0034968//histone lysine methylation;GO:0006464//cellular protein modification process;GO:0043414//macromolecule methylation;GO:0000278//mitotic cell cycle;GO:0006325//chromatin organization;GO:0043933//macromolecular complex subunit organization;GO:0006479//protein methylation…
XP_014335601	0	78.2833	0.001	3.33667	11.7042	0.00640027	0.485517	no	ACSBG2	PREDICTED: long-chain-fatty-acid--CoA ligase ACSBG2 [Bos mutus]	Metabolism;Organismal Systems	Global and Overview;Endocrine system;Lipid metabolism	ko04920//Adipocytokine signaling pathway;ko03320//PPAR signaling pathway;ko01212//Fatty acid metabolism;ko00071//Fatty acid degradation;ko00061//Fatty acid biosynthesis	K15013	GO:0005622//intracellular;GO:0044424//intracellular part;GO:0044425//membrane part;GO:0031224//intrinsic component of membrane;GO:0005737//cytoplasm;GO:0043229//intracellular organelle;GO:0016020//membrane;GO:0044464//cell part;GO:0043226//organelle;GO:0043227//membrane-bounded organelle;GO:0044444//cytoplasmic part;GO:0005623//cell;GO:0043231//intracellular membrane-bounded organelle	GO:0016790//thiolester hydrolase activity;GO:0003824//catalytic activity;GO:0015645//fatty acid ligase activity;GO:0016877//ligase activity, forming carbon-sulfur bonds;GO:0016787//hydrolase activity;GO:0016874//ligase activity;GO:0016289//CoA hydrolase activity;GO:0016788//hydrolase activity, acting on ester bonds	GO:0044763//single-organism cellular process;GO:0032787//monocarboxylic acid metabolic process;GO:0009987//cellular process;GO:0043436//oxoacid metabolic process;GO:0044281//small molecule metabolic process;GO:0071704//organic substance metabolic process;GO:0044710//single-organism metabolic process;GO:0044237//cellular metabolic process;GO:0044699//single-organism process;GO:0008152//metabolic p…
XP_005903330	0.00333333	41.6633	0.001	3.30667	11.6912	0.00258833	0.315281	no	TSSK1B	PREDICTED: testis-specific serine/threonine-protein kinase 1-like [Bos mutus]	-	-	-	-	-	-	-
Unigene007761	0	11.6033	0.001	3.28333	11.6809	0.0290624	0.904819	no	Unigene007761	PREDICTED: cytospin-A-like [Bison bison bison]	-	-	-	-	-	-	-
XP_005893748	0	90.05	0.001	3.27667	11.678	3.16e-06	0.00593172	up	RFX4	PREDICTED: transcription factor RFX4 isoform X2 [Bos mutus]	-	-	-	-	GO:0044464//cell part;GO:0043226//organelle;GO:0044424//intracellular part;GO:0043227//membrane-bounded organelle;GO:0043229//intracellular organelle;GO:0005622//intracellular;GO:0005623//cell;GO:0043231//intracellular membrane-bounded organelle	GO:0000982//transcription factor activity, RNA polymerase II core promoter proximal region sequence-specific binding;GO:0001012//RNA polymerase II regulatory region DNA binding;GO:1901363//heterocyclic compound binding;GO:0003676//nucleic acid binding;GO:0003700//transcription factor activity, sequence-specific DNA binding;GO:0003690//double-stranded DNA binding;GO:0001067//regulatory region nucl…	GO:1901360//organic cyclic compound metabolic process;GO:0006366//transcription from RNA polymerase II promoter;GO:0007275//multicellular organism development;GO:0034641//cellular nitrogen compound metabolic process;GO:0044249//cellular biosynthetic process;GO:0019538//protein metabolic process;GO:0048856//anatomical structure development;GO:0016070//RNA metabolic process;GO:1901576//organic subs…
Unigene036535	0	8.66667	0.001	3.22667	11.6558	0.00893378	0.571081	no	Unigene036535	PREDICTED: WAS/WASL-interacting protein family member 1-like [Mesocricetus auratus]	-	-	-	-	-	-	-
XP_005903534	0.0466667	245.58	0.00333333	10.6533	11.6421	1.71e-05	0.0163946	up	PICALM	PREDICTED: phosphatidylinositol-binding clathrin assembly protein isoform X2 [Bos mutus]	-	-	-	-	GO:0030120//vesicle coat;GO:0098589//membrane region;GO:0044424//intracellular part;GO:0044425//membrane part;GO:0030659//cytoplasmic vesicle membrane;GO:0044422//organelle part;GO:0031090//organelle membrane;GO:0043234//protein complex;GO:0044433//cytoplasmic vesicle part;GO:0030139//endocytic vesicle;GO:0005905//clathrin-coated pit;GO:0030135//coated vesicle;GO:0005622//intracellular;GO:0031988…	GO:0035091//phosphatidylinositol binding;GO:0030276//clathrin binding;GO:0005488//binding;GO:0005543//phospholipid binding;GO:0008289//lipid binding;GO:0005515//protein binding	GO:0009987//cellular process;GO:0052548//regulation of endopeptidase activity;GO:0050794//regulation of cellular process;GO:0010467//gene expression;GO:0061024//membrane organization;GO:0006351//transcription, DNA-templated;GO:0008104//protein localization;GO:0090304//nucleic acid metabolic process;GO:0010941//regulation of cell death;GO:0008152//metabolic process;GO:0010942//positive regulation …
XP_005904980	0	32.01	0.001	3.19333	11.6408	0.0205143	0.803243	no	TSSK4	testis-specific serine/threonine-protein kinase 4 [Bos taurus]	-	-	-	-	-	-	-
XM_005901938	0	95.6667	0.001	3.11667	11.6058	0.000291228	0.0916415	no	CCDC175	PREDICTED: Bos mutus coiled-coil domain containing 175 (CCDC175), mRNA	-	-	-	-	-	-	-
XM_005898891	0	18.6767	0.001	3.08333	11.5903	0.0376209	0.980202	no	CETN1	PREDICTED: Bos mutus centrin, EF-hand protein, 1 (CETN1), transcript variant X2, mRNA	-	-	-	-	GO:0005929//cilium;GO:0043229//intracellular organelle;GO:0005622//intracellular;GO:0005815//microtubule organizing center;GO:0043232//intracellular non-membrane-bounded organelle;GO:0044422//organelle part;GO:0005623//cell;GO:0042995//cell projection;GO:0072372//primary cilium;GO:0031513//nonmotile primary cilium;GO:0044424//intracellular part;GO:0005813//centrosome;GO:0044464//cell part;GO:0044…	GO:0015631//tubulin binding;GO:0044877//macromolecular complex binding;GO:0043169//cation binding;GO:0046872//metal ion binding;GO:0005515//protein binding;GO:0043167//ion binding;GO:0008092//cytoskeletal protein binding;GO:0032403//protein complex binding;GO:0005488//binding	GO:0000278//mitotic cell cycle;GO:0009628//response to abiotic stimulus;GO:0050896//response to stimulus;GO:0044763//single-organism cellular process;GO:0006950//response to stress;GO:0009408//response to heat;GO:0007049//cell cycle;GO:0044699//single-organism process;GO:0009987//cellular process;GO:0009266//response to temperature stimulus
XP_005911849	0	29.07	0.001	3.07667	11.5872	0.0231379	0.833611	no	TADA2B	PREDICTED: LOW QUALITY PROTEIN: transcriptional adaptor 2B [Bos mutus]	-	-	-	-	-	-	-
XP_005891525	0	44.99	0.001	3.07	11.584	0.0136595	0.682624	no	ZMYND10	PREDICTED: zinc finger MYND domain-containing protein 10 [Bos mutus]	-	-	-	-	-	GO:0043167//ion binding;GO:0043169//cation binding;GO:0005488//binding	GO:0022607//cellular component assembly;GO:0009987//cellular process;GO:0048856//anatomical structure development;GO:0032989//cellular component morphogenesis;GO:1902589//single-organism organelle organization;GO:0030031//cell projection assembly;GO:0048646//anatomical structure formation involved in morphogenesis;GO:0042384//cilium assembly;GO:0048869//cellular developmental process;GO:0060271//…
XP_005901348	0	45.0433	0.001	3.06667	11.5825	0.0136615	0.682624	no	FADS1	PREDICTED: fatty acid desaturase 1 [Bos mutus]	Metabolism	Lipid metabolism;Global and Overview	ko01212//Fatty acid metabolism;ko01040//Biosynthesis of unsaturated fatty acids	K10224	GO:0043226//organelle;GO:0031224//intrinsic component of membrane;GO:0044425//membrane part;GO:0016020//membrane;GO:0005622//intracellular;GO:0012505//endomembrane system;GO:0005623//cell;GO:0042175//nuclear outer membrane-endoplasmic reticulum membrane network;GO:0044464//cell part;GO:0043227//membrane-bounded organelle;GO:0043229//intracellular organelle;GO:0044424//intracellular part;GO:004323…	GO:0046906//tetrapyrrole binding;GO:0016717//oxidoreductase activity, acting on paired donors, with oxidation of a pair of donors resulting in the reduction of molecular oxygen to two molecules of water;GO:0003824//catalytic activity;GO:0043167//ion binding;GO:0097159//organic cyclic compound binding;GO:1901363//heterocyclic compound binding;GO:0005488//binding;GO:0016491//oxidoreductase activity…	GO:0007584//response to nutrient;GO:0008152//metabolic process;GO:0090304//nucleic acid metabolic process;GO:1901652//response to peptide;GO:0006690//icosanoid metabolic process;GO:0009987//cellular process;GO:0009719//response to endogenous stimulus;GO:0034641//cellular nitrogen compound metabolic process;GO:0032774//RNA biosynthetic process;GO:0042221//response to chemical;GO:0034645//cellular …
Unigene018311	0	4.66667	0.001	3.06	11.5793	0.0396026	1	no	-	-	-	-	-	-	-	-	-
XM_005906456	0	66.7933	0.001	3.04667	11.573	0.000896538	0.176849	no	CREM	PREDICTED: Bos mutus cAMP responsive element modulator (CREM), transcript variant X2, mRNA	Organismal Systems	Circulatory system	ko04261//Adrenergic signaling in cardiomyocytes	K09052	GO:0043229//intracellular organelle;GO:0043226//organelle;GO:0043234//protein complex;GO:0044464//cell part;GO:0043231//intracellular membrane-bounded organelle;GO:0032991//macromolecular complex;GO:0044424//intracellular part;GO:0005622//intracellular;GO:0043227//membrane-bounded organelle;GO:0005623//cell	GO:0001067//regulatory region nucleic acid binding;GO:0005488//binding;GO:0044212//transcription regulatory region DNA binding;GO:0003677//DNA binding;GO:1901363//heterocyclic compound binding;GO:0000975//regulatory region DNA binding;GO:0001071//nucleic acid binding transcription factor activity;GO:0003676//nucleic acid binding;GO:0043565//sequence-specific DNA binding;GO:0003690//double-strande…	GO:1901360//organic cyclic compound metabolic process;GO:0019438//aromatic compound biosynthetic process;GO:0048609//multicellular organismal reproductive process;GO:0034641//cellular nitrogen compound metabolic process;GO:0048511//rhythmic process;GO:0009059//macromolecule biosynthetic process;GO:1903509//liposaccharide metabolic process;GO:0007276//gamete generation;GO:0071704//organic substanc…
XM_014482484	0	66.95	0.001	3.02333	11.5619	0.000788049	0.165977	no	TPD52L2	PREDICTED: Bos mutus tumor protein D52-like 2 (TPD52L2), transcript variant X9, mRNA	-	-	-	-	GO:0005623//cell;GO:0044464//cell part;GO:0005737//cytoplasm;GO:0044424//intracellular part;GO:0005622//intracellular;GO:0044444//cytoplasmic part	GO:0005488//binding;GO:0005515//protein binding;GO:0046983//protein dimerization activity;GO:1901363//heterocyclic compound binding;GO:0097159//organic cyclic compound binding;GO:0003723//RNA binding;GO:0003676//nucleic acid binding	-
XP_005904261	0	18.89	0.001	3.02333	11.5619	0.0369537	0.974513	no	LOC102283229	protein G6b precursor [Bos taurus]	-	-	-	-	-	-	-
XM_014476987	0.0133333	110.707	0.001	3.02	11.5603	0.000208862	0.0781861	no	BRD8	PREDICTED: Bos mutus bromodomain containing 8 (BRD8), transcript variant X4, mRNA	-	-	-	-	GO:0032991//macromolecular complex;GO:0043189//H4/H2A histone acetyltransferase complex;GO:1902494//catalytic complex;GO:0070013//intracellular organelle lumen;GO:1902562//H4 histone acetyltransferase complex;GO:0044446//intracellular organelle part;GO:0043231//intracellular membrane-bounded organelle;GO:0031981//nuclear lumen;GO:0043226//organelle;GO:1990234//transferase complex;GO:0005634//nucl…	-	GO:0016570//histone modification;GO:0006475//internal protein amino acid acetylation;GO:0006473//protein acetylation;GO:0006464//cellular protein modification process;GO:0018394//peptidyl-lysine acetylation;GO:0009987//cellular process;GO:0018393//internal peptidyl-lysine acetylation;GO:0043170//macromolecule metabolic process;GO:0043543//protein acylation;GO:0016043//cellular component organizat…
XP_005888567	0	12.1133	0.001	2.95	11.5265	0.0309755	0.928825	no	MED6	PREDICTED: mediator of RNA polymerase II transcription subunit 6 isoform X3 [Bos mutus]	-	-	-	-	GO:0043234//protein complex;GO:0005622//intracellular;GO:0032991//macromolecular complex;GO:0043227//membrane-bounded organelle;GO:0043226//organelle;GO:0005623//cell;GO:0043231//intracellular membrane-bounded organelle;GO:0043229//intracellular organelle;GO:0044424//intracellular part;GO:0044464//cell part	-	GO:0006366//transcription from RNA polymerase II promoter;GO:0006807//nitrogen compound metabolic process;GO:0009987//cellular process;GO:0090304//nucleic acid metabolic process;GO:1901360//organic cyclic compound metabolic process;GO:0034654//nucleobase-containing compound biosynthetic process;GO:0032774//RNA biosynthetic process;GO:0034645//cellular macromolecule biosynthetic process;GO:1901362…
Unigene036490	0	4.66667	0.001	2.88333	11.4935	0.0320789	0.943072	no	Unigene036490	PREDICTED: LOW QUALITY PROTEIN: wiskott-Aldrich syndrome protein [Bos mutus]	Organismal Systems;Cellular Processes	Immune system;Transport and catabolism;Cell motility;Cellular commiunity	ko04144//Endocytosis;ko04810//Regulation of actin cytoskeleton;ko04520//Adherens junction;ko04666//Fc gamma R-mediated phagocytosis;ko04062//Chemokine signaling pathway	K05747	-	GO:0005515//protein binding;GO:0005488//binding	GO:0044699//single-organism process;GO:0009987//cellular process;GO:0044763//single-organism cellular process;GO:0030029//actin filament-based process
XP_014331986	0	40.1267	0.001	2.88333	11.4935	0.0158039	0.730307	no	ARX	PREDICTED: homeobox protein ARX [Colobus angolensis palliatus]	-	-	-	-	GO:0043227//membrane-bounded organelle;GO:0043226//organelle;GO:0043231//intracellular membrane-bounded organelle;GO:0044464//cell part;GO:0005622//intracellular;GO:0043229//intracellular organelle;GO:0005623//cell;GO:0044424//intracellular part	GO:0001071//nucleic acid binding transcription factor activity;GO:0001067//regulatory region nucleic acid binding;GO:0043565//sequence-specific DNA binding;GO:0003676//nucleic acid binding;GO:0005488//binding;GO:1990837//sequence-specific double-stranded DNA binding;GO:0001227//transcriptional repressor activity, RNA polymerase II transcription regulatory region sequence-specific binding;GO:00036…	GO:0048589//developmental growth;GO:0040011//locomotion;GO:0008152//metabolic process;GO:0021885//forebrain cell migration;GO:0030154//cell differentiation;GO:0032774//RNA biosynthetic process;GO:0007420//brain development;GO:0044260//cellular macromolecule metabolic process;GO:0090304//nucleic acid metabolic process;GO:0034641//cellular nitrogen compound metabolic process;GO:0048812//neuron proj…
XP_005908033	0.01	77.26	0.001	2.87	11.4868	0.000504774	0.127071	no	EXOC7	PREDICTED: exocyst complex component 7 isoform X2 [Bos mutus]	Organismal Systems	Endocrine system	ko04910//Insulin signaling pathway	K07195	GO:0044424//intracellular part;GO:0005813//centrosome;GO:0005856//cytoskeleton;GO:0005815//microtubule organizing center;GO:0044464//cell part;GO:0015630//microtubule cytoskeleton;GO:0043228//non-membrane-bounded organelle;GO:0044422//organelle part;GO:0043232//intracellular non-membrane-bounded organelle;GO:0097458//neuron part;GO:0042995//cell projection;GO:0030426//growth cone;GO:0044446//intr…	-	GO:0051179//localization;GO:0016192//vesicle-mediated transport;GO:0006810//transport;GO:0051234//establishment of localization;GO:0050789//regulation of biological process;GO:0065007//biological regulation;GO:0040012//regulation of locomotion
XP_014336335	0	35.0767	0.001	2.86667	11.4852	0.0183054	0.76904	no	NFIC	nuclear factor 1 C-type [Bos taurus]	-	-	-	-	-	-	-
XP_005886903	0	22.5733	0.001	2.85333	11.4784	0.0291039	0.905566	no	MRPL28	PREDICTED: 39S ribosomal protein L28, mitochondrial [Bos mutus]	Genetic Information Processing	Translation	ko03010//Ribosome	K02902	-	-	-
XP_005903257	0	51.5367	0.001	2.83333	11.4683	0.0114433	0.641962	no	TOX2	PREDICTED: TOX high mobility group box family member 2 isoform X1 [Bos mutus]	-	-	-	-	-	-	-
XP_005910341	0	59.4333	0.001	2.83333	11.4683	0.00943015	0.585123	no	KHNYN	PREDICTED: protein KHNYN isoform X2 [Bos mutus]	-	-	-	-	-	-	-
XM_014482103	0	62.4033	0.001	2.82667	11.4649	0.00882381	0.567483	no	CFAP52	PREDICTED: Bos mutus cilia and flagella associated protein 52 (CFAP52), transcript variant X2, mRNA	-	-	-	-	-	-	-
XM_005889436	0	165.57	0.001	2.79333	11.4478	0.00204035	0.284676	no	DDX3X	PREDICTED: Bos mutus DEAD (Asp-Glu-Ala-Asp) box helicase 3, X-linked (DDX3X), transcript variant X4, mRNA	Organismal Systems	Immune system	ko04622//RIG-I-like receptor signaling pathway	K11594	-	-	-
XM_014480675	0	180.71	0.001	2.79	11.446	6.16e-05	0.0369757	up	SHANK3	PREDICTED: Bos mutus SH3 and multiple ankyrin repeat domains 3 (SHANK3), mRNA	Organismal Systems	Nervous system	ko04724//Glutamatergic synapse	K15009	GO:0043229//intracellular organelle;GO:0060076//excitatory synapse;GO:0043226//organelle;GO:0098794//postsynapse;GO:0071944//cell periphery;GO:0014069//postsynaptic density;GO:0044424//intracellular part;GO:0005622//intracellular;GO:0044464//cell part;GO:0016020//membrane;GO:0099572//postsynaptic specialization;GO:0044425//membrane part;GO:0044456//synapse part;GO:0098590//plasma membrane region;…	GO:0030159//receptor signaling complex scaffold activity;GO:0043169//cation binding;GO:0032947//protein complex scaffold;GO:0005515//protein binding;GO:0046914//transition metal ion binding;GO:0005102//receptor binding;GO:0005488//binding;GO:0035254//glutamate receptor binding;GO:0043167//ion binding;GO:0005198//structural molecule activity;GO:0046872//metal ion binding;GO:0019904//protein domain…	GO:0022604//regulation of cell morphogenesis;GO:0051128//regulation of cellular component organization;GO:0007010//cytoskeleton organization;GO:0070925//organelle assembly;GO:0050877//neurological system process;GO:0030036//actin cytoskeleton organization;GO:0003008//system process;GO:0016358//dendrite development;GO:0007611//learning or memory;GO:0030154//cell differentiation;GO:0090066//regulat…
XM_014479802	0	49.6667	0.001	2.75333	11.427	0.0121024	0.656873	no	LOC102274879	PREDICTED: Bos mutus zinc finger protein 211-like (LOC102274879), mRNA	-	-	-	-	GO:0005623//cell;GO:0044464//cell part	GO:0043167//ion binding;GO:0043169//cation binding;GO:0005488//binding	GO:0019438//aromatic compound biosynthetic process;GO:0034654//nucleobase-containing compound biosynthetic process;GO:0009058//biosynthetic process;GO:0008152//metabolic process;GO:1901360//organic cyclic compound metabolic process;GO:0006807//nitrogen compound metabolic process;GO:1901576//organic substance biosynthetic process;GO:0032774//RNA biosynthetic process;GO:0044260//cellular macromolec…
XP_005911309	0	20.0567	0.001	2.75	11.4252	0.0017481	0.261054	no	HIC2	PREDICTED: hypermethylated in cancer 2 protein, partial [Bos mutus]	-	-	-	-	GO:0044464//cell part;GO:0005622//intracellular;GO:0043226//organelle;GO:0043229//intracellular organelle;GO:0043231//intracellular membrane-bounded organelle;GO:0005623//cell;GO:0043227//membrane-bounded organelle;GO:0044424//intracellular part	GO:0043167//ion binding;GO:0005488//binding;GO:0043169//cation binding;GO:0005515//protein binding	-
XP_005902985	0.00666667	41.4733	0.001	2.74667	11.4235	0.0024057	0.307935	no	LOC102266491	RIKEN cDNA E130309D02, isoform CRA_a, partial [Mus musculus]	-	-	-	-	-	-	-
XP_005905982	0	97.9933	0.001	2.73	11.4147	0.000296592	0.0916921	no	KIAA1524	PREDICTED: protein CIP2A [Bos mutus]	-	-	-	-	GO:0016020//membrane	-	GO:0051704//multi-organism process;GO:0050789//regulation of biological process;GO:0044702//single organism reproductive process;GO:0008284//positive regulation of cell proliferation;GO:0022414//reproductive process;GO:0044699//single-organism process;GO:0048522//positive regulation of cellular process;GO:0019953//sexual reproduction;GO:0032504//multicellular organism reproduction;GO:0048232//mal…
XM_005896052	0	24.3333	0.001	2.72333	11.4112	0.0268494	0.875253	no	PSORS1C2	PREDICTED: Bos mutus psoriasis susceptibility 1 candidate 2 (PSORS1C2), mRNA	-	-	-	-	-	-	-
XP_005903487	0	15.39	0.001	2.71	11.4041	0.0127057	0.667509	no	MYL6B	myosin light chain 6B [Bos taurus]	Organismal Systems	Circulatory system;Endocrine system	ko04921//Oxytocin signaling pathway;ko04270//Vascular smooth muscle contraction	K12751	GO:0005576//extracellular region;GO:0031982//vesicle;GO:0044421//extracellular region part;GO:1903561//extracellular vesicle;GO:0043227//membrane-bounded organelle;GO:0043226//organelle;GO:0043230//extracellular organelle	-	-
XP_014332360	0	130.823	0.001	2.71	11.4041	0.00295665	0.334402	no	SYNGAP1	ras/Rap GTPase-activating protein SynGAP [Bos taurus]	Environmental Information Processing	Signal transduction	ko04014//Ras signaling pathway	K17631	-	-	-
XP_005895512	0	54.1333	0.001	2.69667	11.397	0.0101759	0.607227	no	PRMT5	PREDICTED: protein arginine N-methyltransferase 5 isoform X1 [Ovis aries]	Genetic Information Processing	Translation	ko03013//RNA transport	K02516	-	-	-
XP_005910913	0	44.27	0.001	2.69333	11.3952	0.00205331	0.285339	no	LOC102276062	suppressor of SWI4 1 homolog [Bos taurus]	-	-	-	-	-	-	-
XM_014482832	0	82.5833	0.001	2.66	11.3772	0.000434646	0.115363	no	TP73	PREDICTED: Bos mutus tumor protein p73 (TP73), transcript variant X1, mRNA	Environmental Information Processing;Organismal Systems;Cellular Processes	Signal transduction;Nervous system;Cell growth and death	ko04390//Hippo signaling pathway;ko04722//Neurotrophin signaling pathway;ko04115//p53 signaling pathway	K10148	GO:0043227//membrane-bounded organelle;GO:0044424//intracellular part;GO:0070013//intracellular organelle lumen;GO:0031974//membrane-enclosed lumen;GO:0044464//cell part;GO:0044446//intracellular organelle part;GO:0043231//intracellular membrane-bounded organelle;GO:0044428//nuclear part;GO:0005623//cell;GO:0031981//nuclear lumen;GO:0043226//organelle;GO:0043229//intracellular organelle;GO:000563…	GO:0000977//RNA polymerase II regulatory region sequence-specific DNA binding;GO:0001071//nucleic acid binding transcription factor activity;GO:0000975//regulatory region DNA binding;GO:0001012//RNA polymerase II regulatory region DNA binding;GO:0000982//transcription factor activity, RNA polymerase II core promoter proximal region sequence-specific binding;GO:0005488//binding;GO:0043565//sequenc…	GO:0090304//nucleic acid metabolic process;GO:0097659//nucleic acid-templated transcription;GO:0044085//cellular component biogenesis;GO:0065003//macromolecular complex assembly;GO:0022402//cell cycle process;GO:0043933//macromolecular complex subunit organization;GO:0007154//cell communication;GO:0009987//cellular process;GO:0007165//signal transduction;GO:0051726//regulation of cell cycle;GO:00…
XP_005890467	0	22.5433	0.001	2.61333	11.3517	0.0304387	0.919247	no	CAMLG	PREDICTED: calcium signal-modulating cyclophilin ligand [Bos mutus]	-	-	-	-	GO:0043229//intracellular organelle;GO:0043231//intracellular membrane-bounded organelle;GO:0044425//membrane part;GO:0031224//intrinsic component of membrane;GO:0005623//cell;GO:0044424//intracellular part;GO:0044464//cell part;GO:0005622//intracellular;GO:0016020//membrane;GO:0043226//organelle;GO:0043227//membrane-bounded organelle	GO:0005488//binding;GO:0005515//protein binding	GO:0044763//single-organism cellular process;GO:0050789//regulation of biological process;GO:0009987//cellular process;GO:0023052//signaling;GO:0038127//ERBB signaling pathway;GO:0051716//cellular response to stimulus;GO:0007165//signal transduction;GO:0007167//enzyme linked receptor protein signaling pathway;GO:0007169//transmembrane receptor protein tyrosine kinase signaling pathway;GO:0007166/…
XP_005887085	0	40.4433	0.001	2.59667	11.3424	0.0142033	0.695885	no	RUVBL1	PREDICTED: ruvB-like 1 [Bos mutus]	Environmental Information Processing	Signal transduction	ko04310//Wnt signaling pathway	K04499	GO:0005576//extracellular region;GO:0034399//nuclear periphery;GO:0044428//nuclear part;GO:0044424//intracellular part;GO:0043228//non-membrane-bounded organelle;GO:0044446//intracellular organelle part;GO:0044454//nuclear chromosome part;GO:0043230//extracellular organelle;GO:0043226//organelle;GO:0044421//extracellular region part;GO:0005694//chromosome;GO:0000790//nuclear chromatin;GO:0044451/…	GO:0019899//enzyme binding;GO:0036094//small molecule binding;GO:0008026//ATP-dependent helicase activity;GO:0017111//nucleoside-triphosphatase activity;GO:0004386//helicase activity;GO:0097367//carbohydrate derivative binding;GO:0004003//ATP-dependent DNA helicase activity;GO:0001099//basal RNA polymerase II transcription machinery binding;GO:0042623//ATPase activity, coupled;GO:0001085//RNA pol…	GO:1901576//organic substance biosynthetic process;GO:0034654//nucleobase-containing compound biosynthetic process;GO:0040007//growth;GO:0070727//cellular macromolecule localization;GO:0010941//regulation of cell death;GO:0006475//internal protein amino acid acetylation;GO:0019953//sexual reproduction;GO:0045184//establishment of protein localization;GO:0044702//single organism reproductive proce…
XP_005893396	0	35.14	0.001	2.57	11.3276	0.0183161	0.76904	no	KLF4	PREDICTED: Krueppel-like factor 4 [Bos mutus]	Cellular Processes	Cellular commiunity	ko04550//Signaling pathways regulating pluripotency of stem cells	K17846	GO:0005622//intracellular;GO:0043233//organelle lumen;GO:0044464//cell part;GO:0032991//macromolecular complex;GO:0043229//intracellular organelle;GO:0031981//nuclear lumen;GO:0043231//intracellular membrane-bounded organelle;GO:0000228//nuclear chromosome;GO:0044422//organelle part;GO:0043227//membrane-bounded organelle;GO:0070013//intracellular organelle lumen;GO:0043226//organelle;GO:0044427//…	GO:0003690//double-stranded DNA binding;GO:0000982//transcription factor activity, RNA polymerase II core promoter proximal region sequence-specific binding;GO:0001076//transcription factor activity, RNA polymerase II transcription factor binding;GO:1990837//sequence-specific double-stranded DNA binding;GO:0003677//DNA binding;GO:0097159//organic cyclic compound binding;GO:0001134//transcription …	GO:0061564//axon development;GO:0051098//regulation of binding;GO:0043534//blood vessel endothelial cell migration;GO:0048731//system development;GO:0072593//reactive oxygen species metabolic process;GO:0030182//neuron differentiation;GO:0032682//negative regulation of chemokine production;GO:0009791//post-embryonic development;GO:0030155//regulation of cell adhesion;GO:0001667//ameboidal-type ce…
XP_005906964	0	42.9	0.001	2.57	11.3276	0.014448	0.701845	no	DPH2	PREDICTED: diphthamide biosynthesis protein 2 [Bos mutus]	-	-	-	-	-	-	-
XM_005908201	0	41.4567	0.001	2.55	11.3163	0.00250736	0.312194	no	UPK1A	PREDICTED: Bos mutus uroplakin 1A (UPK1A), transcript variant X2, mRNA	-	-	-	-	-	-	-
XP_005899693	0	56	0.001	2.53333	11.3068	0.009696	0.591276	no	SLC9A8	PREDICTED: LOW QUALITY PROTEIN: sodium/hydrogen exchanger 8 isoform X1 [Bos taurus]	-	-	-	-	GO:0016020//membrane;GO:0044425//membrane part;GO:0031224//intrinsic component of membrane	GO:0015299//solute:proton antiporter activity;GO:0015491//cation:cation antiporter activity;GO:0022804//active transmembrane transporter activity;GO:0015297//antiporter activity;GO:0015298//solute:cation antiporter activity;GO:0015075//ion transmembrane transporter activity;GO:0022892//substrate-specific transporter activity;GO:0022857//transmembrane transporter activity;GO:0099516//ion antiporte…	GO:0055082//cellular chemical homeostasis;GO:0044763//single-organism cellular process;GO:0055080//cation homeostasis;GO:0044765//single-organism transport;GO:0050801//ion homeostasis;GO:0006810//transport;GO:0006814//sodium ion transport;GO:0055067//monovalent inorganic cation homeostasis;GO:0006812//cation transport;GO:0030641//regulation of cellular pH;GO:0030003//cellular cation homeostasis;G…
XP_005894577	0	96.94	0.001	2.51333	11.2954	0.000547377	0.130807	no	APOBR	PREDICTED: apolipoprotein B receptor [Bos mutus]	-	-	-	-	-	GO:0004872//receptor activity;GO:0030228//lipoprotein particle receptor activity;GO:0060089//molecular transducer activity;GO:0038024//cargo receptor activity	GO:0051234//establishment of localization;GO:0010876//lipid localization;GO:0006810//transport;GO:0016192//vesicle-mediated transport;GO:0006897//endocytosis;GO:0033036//macromolecule localization;GO:0051179//localization
XM_005889498	0	32.6667	0.001	2.48	11.2761	0.0198917	0.796046	no	COLEC11	PREDICTED: Bos mutus collectin sub-family member 11 (COLEC11), transcript variant X5, mRNA	Cellular Processes	Transport and catabolism	ko04145//Phagosome	K10066	GO:0043234//protein complex;GO:0032991//macromolecular complex	GO:0005488//binding	GO:0044707//single-multicellular organism process;GO:0032501//multicellular organismal process;GO:0044699//single-organism process
XM_005902539	0	60.7667	0.001	2.48	11.2761	2.73e-05	0.0208806	up	LOC102282103	PREDICTED: Bos mutus chromosome unknown open reading frame, human C12orf56 (LOC102282103), mRNA	-	-	-	-	-	-	-
XM_005909521	0	73.14	0.001	2.45333	11.2605	0.00703894	0.502932	no	ABCF3	PREDICTED: Bos mutus ATP-binding cassette, sub-family F (GCN20), member 3 (ABCF3), transcript variant X2, mRNA	-	-	-	-	-	GO:0097367//carbohydrate derivative binding;GO:0016787//hydrolase activity;GO:0032550//purine ribonucleoside binding;GO:0017111//nucleoside-triphosphatase activity;GO:0001883//purine nucleoside binding;GO:0097159//organic cyclic compound binding;GO:0036094//small molecule binding;GO:0016817//hydrolase activity, acting on acid anhydrides;GO:1901363//heterocyclic compound binding;GO:0003824//cataly…	-
XP_014337722	0	102.237	0.001	2.45	11.2586	0.00431098	0.406146	no	CASKIN2	PREDICTED: LOW QUALITY PROTEIN: caskin-2 [Bos mutus]	-	-	-	-	-	-	-
XM_014481256	0	83.7767	0.001	2.44667	11.2566	0.000495854	0.126393	no	MUT	PREDICTED: Bos mutus methylmalonyl CoA mutase (MUT), transcript variant X1, mRNA	Metabolism	Amino acid metabolism;Carbohydrate metabolism;Global and Overview	ko01200//Carbon metabolism;ko00280//Valine, leucine and isoleucine degradation;ko00630//Glyoxylate and dicarboxylate metabolism;ko00640//Propanoate metabolism	K01847	-	-	-
XP_005906695	0	91.2967	0.001	2.43	11.2467	0.00450572	0.415698	no	RBM26	PREDICTED: RNA-binding protein 26 isoform X4 [Bos mutus]	-	-	-	-	-	GO:0005488//binding;GO:1901363//heterocyclic compound binding;GO:0097159//organic cyclic compound binding;GO:0003676//nucleic acid binding;GO:0043167//ion binding;GO:0043169//cation binding	GO:0043170//macromolecule metabolic process;GO:0010467//gene expression;GO:0090304//nucleic acid metabolic process;GO:0046483//heterocycle metabolic process;GO:0071704//organic substance metabolic process;GO:0044260//cellular macromolecule metabolic process;GO:0006139//nucleobase-containing compound metabolic process;GO:1901360//organic cyclic compound metabolic process;GO:0009987//cellular proce…
XM_014477152	0	16.8667	0.001	2.42667	11.2448	0.0127672	0.667698	no	PTRH2	PREDICTED: Bos mutus peptidyl-tRNA hydrolase 2 (PTRH2), transcript variant X3, mRNA	-	-	-	-	GO:0044464//cell part;GO:0044425//membrane part;GO:0044424//intracellular part;GO:0005622//intracellular;GO:0031224//intrinsic component of membrane;GO:0043226//organelle;GO:0043229//intracellular organelle;GO:0005623//cell;GO:0016020//membrane;GO:0043227//membrane-bounded organelle;GO:0043231//intracellular membrane-bounded organelle	GO:0003824//catalytic activity	-
XM_005893599	0	66.0433	0.001	2.42	11.2408	0.00289128	0.334141	no	LOC102278604	PREDICTED: Bos mutus chromosome unknown open reading frame, human C2orf42 (LOC102278604), transcript variant X2, mRNA	-	-	-	-	GO:0005623//cell;GO:0044424//intracellular part;GO:0031967//organelle envelope;GO:0043226//organelle;GO:0044428//nuclear part;GO:0044446//intracellular organelle part;GO:0043231//intracellular membrane-bounded organelle;GO:0043229//intracellular organelle;GO:0044422//organelle part;GO:0012505//endomembrane system;GO:0043227//membrane-bounded organelle;GO:0005622//intracellular;GO:0005635//nuclear…	-	-
XP_014337550	0	30.5833	0.001	2.38667	11.2208	0.0215981	0.814024	no	LTBR	PREDICTED: tumor necrosis factor receptor superfamily member 3 [Bos mutus]	Environmental Information Processing;Organismal Systems	Signal transduction;Signaling molecules and interaction;Immune system	ko04060//Cytokine-cytokine receptor interaction;ko04066//HIF-1 signaling pathway;ko04064//NF-kappa B signaling pathway;ko04672//Intestinal immune network for IgA production	K03159	GO:0031224//intrinsic component of membrane;GO:0016020//membrane;GO:0044425//membrane part	GO:0019899//enzyme binding;GO:0044389//ubiquitin-like protein ligase binding;GO:0005515//protein binding;GO:0005488//binding	GO:0019538//protein metabolic process;GO:0031098//stress-activated protein kinase signaling cascade;GO:0023052//signaling;GO:0043412//macromolecule modification;GO:0008152//metabolic process;GO:0006950//response to stress;GO:0009987//cellular process;GO:0050789//regulation of biological process;GO:0006468//protein phosphorylation;GO:0023014//signal transduction by protein phosphorylation;GO:00071…
Unigene014811	0	5	0.001	2.37667	11.2147	0.0407301	1	no	Unigene014811	E130012A19Rik protein, partial [Mus musculus]	-	-	-	-	-	-	-
XP_005907367	0	22.0533	0.001	2.34333	11.1943	0.0300269	0.916622	no	LOC102269498	C2orf73 protein, partial [Homo sapiens]	-	-	-	-	-	-	-
XP_005909775	0	45.0567	0.001	2.31333	11.1758	0.0136572	0.682624	no	PTBP1	polypyrimidine tract-binding protein 1 isoform 1 [Bos taurus]	-	-	-	-	GO:0043231//intracellular membrane-bounded organelle;GO:0043226//organelle;GO:1903561//extracellular vesicle;GO:0044421//extracellular region part;GO:0005623//cell;GO:0005622//intracellular;GO:0031982//vesicle;GO:0043229//intracellular organelle;GO:0044464//cell part;GO:0005576//extracellular region;GO:0043227//membrane-bounded organelle;GO:0043230//extracellular organelle;GO:0044424//intracellul…	GO:0003676//nucleic acid binding;GO:1901363//heterocyclic compound binding;GO:0097159//organic cyclic compound binding;GO:0003723//RNA binding;GO:0005488//binding	GO:0090304//nucleic acid metabolic process;GO:0006397//mRNA processing;GO:0044260//cellular macromolecule metabolic process;GO:0043170//macromolecule metabolic process;GO:0000398//mRNA splicing, via spliceosome;GO:0044767//single-organism developmental process;GO:0046483//heterocycle metabolic process;GO:0000380//alternative mRNA splicing, via spliceosome;GO:0008152//metabolic process;GO:0048869/…
XP_005890826	0	33.0933	0.001	2.30333	11.1695	0.0196758	0.789811	no	ECSIT	PREDICTED: evolutionarily conserved signaling intermediate in Toll pathway, mitochondrial isoform X1 [Bos mutus]	Environmental Information Processing	Signal transduction	ko04010//MAPK signaling pathway	K04405	GO:0044428//nuclear part;GO:0031981//nuclear lumen;GO:0044446//intracellular organelle part;GO:0044464//cell part;GO:0005623//cell;GO:0044422//organelle part;GO:0043226//organelle;GO:0043233//organelle lumen;GO:0005622//intracellular;GO:0070013//intracellular organelle lumen;GO:0031974//membrane-enclosed lumen;GO:0043229//intracellular organelle;GO:0044424//intracellular part;GO:0043227//membrane…	GO:0016491//oxidoreductase activity;GO:0003824//catalytic activity	GO:0050789//regulation of biological process;GO:0044710//single-organism metabolic process;GO:0006950//response to stress;GO:0065007//biological regulation;GO:0019222//regulation of metabolic process;GO:0008152//metabolic process;GO:0050896//response to stimulus;GO:0006952//defense response;GO:0044699//single-organism process
XP_005887877	0	26.35	0.001	2.3	11.1674	0.0258141	0.861166	no	SEPT12	PREDICTED: septin-12 isoform X1 [Bos mutus]	-	-	-	-	GO:0005929//cilium;GO:0044464//cell part;GO:0015630//microtubule cytoskeleton;GO:0032156//septin cytoskeleton;GO:0005622//intracellular;GO:0032153//cell division site;GO:0036126//sperm flagellum;GO:0005737//cytoplasm;GO:0005856//cytoskeleton;GO:0005623//cell;GO:0097223//sperm part;GO:0032155//cell division site part;GO:0043226//organelle;GO:0043228//non-membrane-bounded organelle;GO:0044444//cyto…	GO:0005543//phospholipid binding;GO:0001882//nucleoside binding;GO:0097159//organic cyclic compound binding;GO:0097367//carbohydrate derivative binding;GO:1901363//heterocyclic compound binding;GO:0036094//small molecule binding;GO:0046983//protein dimerization activity;GO:0001883//purine nucleoside binding;GO:0005515//protein binding;GO:0032550//purine ribonucleoside binding;GO:0032549//ribonucl…	GO:0044763//single-organism cellular process;GO:0009987//cellular process;GO:0044699//single-organism process
XP_014334697	0	26.35	0.001	2.3	11.1674	0.0258172	0.861166	no	SEPT12	PREDICTED: septin-12 isoform X1 [Bos mutus]	-	-	-	-	GO:0044444//cytoplasmic part;GO:0015630//microtubule cytoskeleton;GO:0044464//cell part;GO:0032156//septin cytoskeleton;GO:0032153//cell division site;GO:0042995//cell projection;GO:0043228//non-membrane-bounded organelle;GO:0043226//organelle;GO:0036126//sperm flagellum;GO:0043229//intracellular organelle;GO:0005856//cytoskeleton;GO:0005623//cell;GO:0005622//intracellular;GO:0005737//cytoplasm;G…	GO:0005543//phospholipid binding;GO:0005515//protein binding;GO:0097159//organic cyclic compound binding;GO:0008289//lipid binding;GO:0046983//protein dimerization activity;GO:0032549//ribonucleoside binding;GO:0032550//purine ribonucleoside binding;GO:0001882//nucleoside binding;GO:0097367//carbohydrate derivative binding;GO:1901363//heterocyclic compound binding;GO:0001883//purine nucleoside bi…	GO:0044763//single-organism cellular process;GO:0044699//single-organism process;GO:0009987//cellular process
XP_014332687	0	82.8233	0.001	2.29333	11.1632	0.00137204	0.226666	no	ZC3H18	Zinc finger CCCH domain-containing protein 18 [Bos mutus]	-	-	-	-	GO:0044464//cell part;GO:0043226//organelle;GO:0043229//intracellular organelle;GO:0043233//organelle lumen;GO:0005623//cell;GO:0043227//membrane-bounded organelle;GO:0005622//intracellular;GO:0044424//intracellular part;GO:0044446//intracellular organelle part;GO:0044428//nuclear part;GO:0043231//intracellular membrane-bounded organelle;GO:0031974//membrane-enclosed lumen;GO:0005634//nucleus;GO:…	GO:0043169//cation binding;GO:0043167//ion binding;GO:0005488//binding	-
XM_005900163	0	98.1433	0.001	2.25667	11.14	0.00461706	0.421422	no	CTNNA1	PREDICTED: Bos mutus catenin (cadherin-associated protein), alpha 1, 102kDa (CTNNA1), transcript variant X5, mRNA	Environmental Information Processing;Cellular Processes;Organismal Systems	Cellular commiunity;Signal transduction;Immune system	ko04390//Hippo signaling pathway;ko04530//Tight junction;ko04670//Leukocyte transendothelial migration;ko04520//Adherens junction	K05691	GO:0031252//cell leading edge;GO:0043229//intracellular organelle;GO:0016020//membrane;GO:0005924//cell-substrate adherens junction;GO:0005912//adherens junction;GO:0005886//plasma membrane;GO:0043231//intracellular membrane-bounded organelle;GO:0019897//extrinsic component of plasma membrane;GO:0044853//plasma membrane raft;GO:0098589//membrane region;GO:0044459//plasma membrane part;GO:0005622/…	GO:1901363//heterocyclic compound binding;GO:0005488//binding;GO:0003723//RNA binding;GO:0097159//organic cyclic compound binding;GO:0003676//nucleic acid binding;GO:0005515//protein binding;GO:0003779//actin binding;GO:0008092//cytoskeletal protein binding;GO:0050839//cell adhesion molecule binding	GO:0061351//neural precursor cell proliferation;GO:0007166//cell surface receptor signaling pathway;GO:0048731//system development;GO:0042221//response to chemical;GO:0016043//cellular component organization;GO:0022607//cellular component assembly;GO:0030036//actin cytoskeleton organization;GO:0071407//cellular response to organic cyclic compound;GO:0048869//cellular developmental process;GO:0007…
XP_005889997	0	85.8433	0.001	2.25667	11.14	0.00556729	0.462032	no	ZBTB4	PREDICTED: zinc finger and BTB domain-containing protein 4 [Bos mutus]	-	-	-	-	GO:0005622//intracellular;GO:0044424//intracellular part;GO:0043227//membrane-bounded organelle;GO:0044464//cell part;GO:0005623//cell;GO:0043229//intracellular organelle;GO:0043226//organelle;GO:0043231//intracellular membrane-bounded organelle	GO:0005515//protein binding;GO:0005488//binding;GO:0003677//DNA binding;GO:0001067//regulatory region nucleic acid binding;GO:0003690//double-stranded DNA binding;GO:0097159//organic cyclic compound binding;GO:0043565//sequence-specific DNA binding;GO:0000976//transcription regulatory region sequence-specific DNA binding;GO:0019900//kinase binding;GO:1990837//sequence-specific double-stranded DNA…	GO:0034645//cellular macromolecule biosynthetic process;GO:0044237//cellular metabolic process;GO:0043170//macromolecule metabolic process;GO:0008152//metabolic process;GO:0006807//nitrogen compound metabolic process;GO:0097659//nucleic acid-templated transcription;GO:0050896//response to stimulus;GO:0019438//aromatic compound biosynthetic process;GO:0044249//cellular biosynthetic process;GO:0051…
XP_005894582	0	135.233	0.001	2.25667	11.14	0.00263056	0.318225	no	GTF3C1	PREDICTED: general transcription factor 3C polypeptide 1-like, partial [Bos mutus]	-	-	-	-	GO:0043229//intracellular organelle;GO:0031974//membrane-enclosed lumen;GO:0005634//nucleus;GO:0044446//intracellular organelle part;GO:0044424//intracellular part;GO:0043233//organelle lumen;GO:0070013//intracellular organelle lumen;GO:0005622//intracellular;GO:0044428//nuclear part;GO:0044422//organelle part;GO:0005623//cell;GO:0043227//membrane-bounded organelle;GO:0031981//nuclear lumen;GO:00…	-	-
XM_005890018	0.0666667	68.3767	0.001	2.24333	11.1314	9.32e-06	0.0117337	up	FUT8	PREDICTED: Bos mutus fucosyltransferase 8 (alpha (1,6) fucosyltransferase) (FUT8), transcript variant X3, mRNA	Metabolism	Glycan biosynthesis and metabolism	ko00510//N-Glycan biosynthesis;ko00533//Glycosaminoglycan biosynthesis - keratan sulfate	K00717	-	-	-
XP_005891548	0	18.1667	0.001	2.22333	11.1185	0.0392299	0.99613	no	MLEC	PREDICTED: LOW QUALITY PROTEIN: malectin [Bos mutus]	-	-	-	-	GO:0044425//membrane part;GO:0016020//membrane;GO:0031224//intrinsic component of membrane	GO:0005515//protein binding;GO:0005488//binding	-
XM_005902281	0	76.98	0.001	2.20333	11.1055	1.33e-05	0.0140972	up	CTAGE5	PREDICTED: Bos mutus CTAGE family, member 5 (CTAGE5), transcript variant X4, mRNA	-	-	-	-	GO:0031224//intrinsic component of membrane;GO:0016020//membrane;GO:0044425//membrane part	-	-
XM_005904821	0	18.7833	0.001	2.19333	11.0989	0.0375998	0.980202	no	ACRV1	PREDICTED: Bos mutus acrosomal vesicle protein 1 (ACRV1), transcript variant X2, mRNA	-	-	-	-	-	-	-
XM_014482853	0	34.1867	0.001	2.18667	11.0945	0.000195331	0.0765983	no	RAB7B	PREDICTED: Bos mutus RAB7B, member RAS oncogene family (RAB7B), transcript variant X1, mRNA	Cellular Processes	Transport and catabolism	ko04145//Phagosome	K07898	GO:0012505//endomembrane system;GO:0044464//cell part;GO:0030659//cytoplasmic vesicle membrane;GO:0043229//intracellular organelle;GO:0005773//vacuole;GO:0098805//whole membrane;GO:0044444//cytoplasmic part;GO:0043231//intracellular membrane-bounded organelle;GO:0005737//cytoplasm;GO:0005794//Golgi apparatus;GO:0030666//endocytic vesicle membrane;GO:0043226//organelle;GO:0005622//intracellular;GO…	GO:0036094//small molecule binding;GO:0005488//binding	GO:0008104//protein localization;GO:0050776//regulation of immune response;GO:0016192//vesicle-mediated transport;GO:0042147//retrograde transport, endosome to Golgi;GO:0032501//multicellular organismal process;GO:0044093//positive regulation of molecular function;GO:0023057//negative regulation of signaling;GO:0051716//cellular response to stimulus;GO:0048519//negative regulation of biological p…
XP_005892516	0	20.2233	0.001	2.18	11.0901	0.0340866	0.960035	no	ZDHHC7	PREDICTED: palmitoyltransferase ZDHHC7 [Bos taurus]	-	-	-	-	GO:0044446//intracellular organelle part;GO:0044424//intracellular part;GO:0044425//membrane part;GO:0005634//nucleus;GO:0043229//intracellular organelle;GO:0044422//organelle part;GO:0031981//nuclear lumen;GO:0016020//membrane;GO:0070013//intracellular organelle lumen;GO:0043231//intracellular membrane-bounded organelle;GO:0005622//intracellular;GO:0043227//membrane-bounded organelle;GO:0043226/…	GO:0016740//transferase activity;GO:0046872//metal ion binding;GO:0016409//palmitoyltransferase activity;GO:0046914//transition metal ion binding;GO:0043167//ion binding;GO:0016746//transferase activity, transferring acyl groups;GO:0016747//transferase activity, transferring acyl groups other than amino-acyl groups;GO:0005488//binding;GO:0003824//catalytic activity;GO:0043169//cation binding	GO:1901576//organic substance biosynthetic process;GO:0006497//protein lipidation;GO:0018231//peptidyl-S-diacylglycerol-L-cysteine biosynthetic process from peptidyl-cysteine;GO:0043412//macromolecule modification;GO:0071704//organic substance metabolic process;GO:0042158//lipoprotein biosynthetic process;GO:0008152//metabolic process;GO:0019538//protein metabolic process;GO:0043170//macromolecul…
XP_005909494	0	23.14	0.001	2.17667	11.0879	0.0298095	0.912652	no	TOB2	PREDICTED: LOW QUALITY PROTEIN: protein Tob2 [Bos mutus]	Genetic Information Processing	Folding, sorting and degradation	ko03018//RNA degradation	K14443	-	GO:0005515//protein binding;GO:0005488//binding;GO:0008134//transcription factor binding	GO:0045638//negative regulation of myeloid cell differentiation;GO:0045637//regulation of myeloid cell differentiation;GO:0050793//regulation of developmental process;GO:0044707//single-multicellular organism process;GO:0045596//negative regulation of cell differentiation;GO:0048519//negative regulation of biological process;GO:0002762//negative regulation of myeloid leukocyte differentiation;GO:…
XP_005893387	0	32.04	0.001	2.16	11.0768	0.0184826	0.76904	no	ACTL7A	PREDICTED: actin-like protein 7A [Bos mutus]	-	-	-	-	GO:0043231//intracellular membrane-bounded organelle;GO:0043226//organelle;GO:0043229//intracellular organelle;GO:0005623//cell;GO:0043227//membrane-bounded organelle;GO:0042995//cell projection;GO:0005622//intracellular;GO:0044464//cell part;GO:0032991//macromolecular complex;GO:0044424//intracellular part;GO:0043232//intracellular non-membrane-bounded organelle;GO:0005929//cilium;GO:0043228//no…	-	-
XM_005897297	0	94.43	0.001	2.15	11.0701	0.00489896	0.430921	no	LOC102269370	PREDICTED: Bos mutus zinc finger protein 234 (LOC102269370), mRNA	-	-	-	-	-	-	-
Unigene011471	0	6.33333	0.001	2.14333	11.0656	0.0229743	0.833611	no	-	-	-	-	-	-	-	-	-
XP_005910468	0	27.62	0.001	2.14	11.0634	0.0232891	0.833611	no	KIAA1715	PREDICTED: protein lunapark isoform X2 [Bos mutus]	-	-	-	-	-	-	-
XP_005893137	0	86.1733	0.001	2.13	11.0566	0.00553637	0.460189	no	RABGAP1	PREDICTED: rab GTPase-activating protein 1 [Bos mutus]	-	-	-	-	GO:0005623//cell;GO:0044424//intracellular part;GO:0015630//microtubule cytoskeleton;GO:0043226//organelle;GO:0043229//intracellular organelle;GO:0044444//cytoplasmic part;GO:0043228//non-membrane-bounded organelle;GO:0005622//intracellular;GO:0005856//cytoskeleton;GO:0044464//cell part;GO:0043232//intracellular non-membrane-bounded organelle;GO:0005737//cytoplasm	GO:0098772//molecular function regulator;GO:0019899//enzyme binding;GO:0017016//Ras GTPase binding;GO:0008047//enzyme activator activity;GO:0005515//protein binding;GO:0051020//GTPase binding;GO:0005488//binding;GO:0030234//enzyme regulator activity;GO:0031267//small GTPase binding	GO:0044699//single-organism process;GO:0051336//regulation of hydrolase activity;GO:0009987//cellular process;GO:0065007//biological regulation;GO:0065009//regulation of molecular function;GO:0043087//regulation of GTPase activity;GO:0050790//regulation of catalytic activity;GO:0044763//single-organism cellular process
XP_005897937	0	27.43	0.001	2.12667	11.0544	0.00600665	0.474731	no	LOC102276921	PREDICTED: testis-specific serine/threonine-protein kinase 5-like [Bos mutus]	-	-	-	-	-	GO:0032550//purine ribonucleoside binding;GO:0036094//small molecule binding;GO:0097159//organic cyclic compound binding;GO:0001882//nucleoside binding;GO:0097367//carbohydrate derivative binding;GO:1901363//heterocyclic compound binding;GO:0005488//binding;GO:0032549//ribonucleoside binding;GO:0001883//purine nucleoside binding	GO:0009987//cellular process;GO:0044260//cellular macromolecule metabolic process;GO:0071704//organic substance metabolic process;GO:0044238//primary metabolic process;GO:0036211//protein modification process;GO:0019538//protein metabolic process;GO:0006464//cellular protein modification process;GO:0043170//macromolecule metabolic process;GO:0044237//cellular metabolic process;GO:0044267//cellula…
XM_014477720	0	72.2967	0.001	2.11333	11.0453	0.00713314	0.504957	no	KIF2C	PREDICTED: Bos mutus kinesin family member 2C (KIF2C), transcript variant X2, mRNA	-	-	-	-	-	-	-
XP_005899506	0	45.2433	0.001	2.11333	11.0453	0.0135175	0.682624	no	GTPBP1	PREDICTED: GTP-binding protein 1 [Bos mutus]	-	-	-	-	-	-	-
XP_005909847	0	18.08	0.001	2.09667	11.0339	0.0392336	0.99613	no	NR2F6	PREDICTED: nuclear receptor subfamily 2 group F member 6 [Bos mutus]	-	-	-	-	GO:0005622//intracellular;GO:0005623//cell;GO:0043227//membrane-bounded organelle;GO:0043231//intracellular membrane-bounded organelle;GO:0043229//intracellular organelle;GO:0044464//cell part;GO:0044424//intracellular part;GO:0043226//organelle	GO:0000976//transcription regulatory region sequence-specific DNA binding;GO:0004871//signal transducer activity;GO:0043167//ion binding;GO:0000975//regulatory region DNA binding;GO:0003676//nucleic acid binding;GO:0000977//RNA polymerase II regulatory region sequence-specific DNA binding;GO:0044212//transcription regulatory region DNA binding;GO:1990837//sequence-specific double-stranded DNA bin…	GO:0097659//nucleic acid-templated transcription;GO:0048699//generation of neurons;GO:0090304//nucleic acid metabolic process;GO:0007399//nervous system development;GO:0044237//cellular metabolic process;GO:0044707//single-multicellular organism process;GO:1901362//organic cyclic compound biosynthetic process;GO:0009648//photoperiodism;GO:0046483//heterocycle metabolic process;GO:0034654//nucleob…
XP_005896943	0	37.0233	0.001	2.08	11.0224	0.00329512	0.354285	no	TCF4	PREDICTED: transcription factor 4 isoform X13 [Bos mutus]	-	-	-	-	GO:0005623//cell;GO:0032991//macromolecular complex;GO:0044424//intracellular part;GO:0016020//membrane;GO:0005622//intracellular;GO:0031224//intrinsic component of membrane;GO:0044464//cell part;GO:0043227//membrane-bounded organelle;GO:0043226//organelle;GO:0043229//intracellular organelle;GO:0043234//protein complex;GO:0043231//intracellular membrane-bounded organelle;GO:0044425//membrane part	GO:0003677//DNA binding;GO:1901363//heterocyclic compound binding;GO:0001098//basal transcription machinery binding;GO:0044212//transcription regulatory region DNA binding;GO:0005515//protein binding;GO:0003676//nucleic acid binding;GO:0000981//RNA polymerase II transcription factor activity, sequence-specific DNA binding;GO:0043565//sequence-specific DNA binding;GO:0001076//transcription factor …	GO:0032502//developmental process;GO:0048699//generation of neurons;GO:0008152//metabolic process;GO:0044249//cellular biosynthetic process;GO:0044707//single-multicellular organism process;GO:0050794//regulation of cellular process;GO:0010646//regulation of cell communication;GO:0032774//RNA biosynthetic process;GO:0023051//regulation of signaling;GO:0006139//nucleobase-containing compound metab…
XM_005896401	0	40.8733	0.001	2.07333	11.0177	0.00237511	0.306024	no	MCRS1	PREDICTED: Bos mutus microspherule protein 1 (MCRS1), transcript variant X4, mRNA	-	-	-	-	GO:0043227//membrane-bounded organelle;GO:0044665//MLL1/2 complex;GO:0044451//nucleoplasm part;GO:0044446//intracellular organelle part;GO:0000790//nuclear chromatin;GO:0005856//cytoskeleton;GO:1990234//transferase complex;GO:0032991//macromolecular complex;GO:0005634//nucleus;GO:0044428//nuclear part;GO:0044422//organelle part;GO:0043233//organelle lumen;GO:0070013//intracellular organelle lumen…	GO:0003824//catalytic activity;GO:0016407//acetyltransferase activity;GO:0008080//N-acetyltransferase activity;GO:0016746//transferase activity, transferring acyl groups;GO:0016747//transferase activity, transferring acyl groups other than amino-acyl groups;GO:0004857//enzyme inhibitor activity;GO:0098772//molecular function regulator;GO:0010485//H4 histone acetyltransferase activity;GO:0034212//…	GO:0006275//regulation of DNA replication;GO:0032200//telomere organization;GO:0090304//nucleic acid metabolic process;GO:0008156//negative regulation of DNA replication;GO:0031326//regulation of cellular biosynthetic process;GO:0065008//regulation of biological quality;GO:0042592//homeostatic process;GO:0060249//anatomical structure homeostasis;GO:0009890//negative regulation of biosynthetic pro…
XM_014477692	0	17.8667	0.001	2.03	10.9873	0.00188012	0.273056	no	SPDYC	PREDICTED: Bos mutus speedy/RINGO cell cycle regulator family member C (SPDYC), mRNA	Organismal Systems;Cellular Processes	Cell growth and death;Endocrine system	ko04114//Oocyte meiosis;ko04914//Progesterone-mediated oocyte maturation	K08694	-	-	-
XM_005899335	0	132	0.001	2.02667	10.9849	0.00291342	0.334402	no	CEP112	PREDICTED: Bos mutus centrosomal protein 112kDa (CEP112), mRNA	-	-	-	-	-	-	-
XP_014333620	0	23.0533	0.001	2.02667	10.9849	0.0169111	0.746508	no	AJUBA	LIM domain-containing protein ajuba [Bos taurus]	Environmental Information Processing	Signal transduction	ko04390//Hippo signaling pathway	K16682	GO:0005622//intracellular;GO:0005856//cytoskeleton;GO:0030529//intracellular ribonucleoprotein complex;GO:0043227//membrane-bounded organelle;GO:0044430//cytoskeletal part;GO:0015630//microtubule cytoskeleton;GO:0044446//intracellular organelle part;GO:0043228//non-membrane-bounded organelle;GO:0005924//cell-substrate adherens junction;GO:0030055//cell-substrate junction;GO:0043226//organelle;GO:…	GO:0003779//actin binding;GO:0000988//transcription factor activity, protein binding;GO:0043169//cation binding;GO:0000989//transcription factor activity, transcription factor binding;GO:0046914//transition metal ion binding;GO:0005515//protein binding;GO:0005488//binding;GO:0043167//ion binding;GO:0003712//transcription cofactor activity;GO:0008092//cytoskeletal protein binding;GO:0044877//macro…	GO:0031023//microtubule organizing center organization;GO:0043170//macromolecule metabolic process;GO:0034645//cellular macromolecule biosynthetic process;GO:0044700//single organism signaling;GO:0097659//nucleic acid-templated transcription;GO:0051246//regulation of protein metabolic process;GO:0042221//response to chemical;GO:0022607//cellular component assembly;GO:0036294//cellular response to…
XP_014337677	0	43.9267	0.001	2.01667	10.9778	0.00213488	0.292003	no	LOC102276606	Zinc finger protein 845, partial [Bos mutus]	-	-	-	-	-	GO:0046872//metal ion binding;GO:0043167//ion binding;GO:0005488//binding;GO:0043169//cation binding	-
XM_005890881	0	99.5433	0.001	1.99333	10.961	0.000273201	0.0902673	no	HIPK3	PREDICTED: Bos mutus homeodomain interacting protein kinase 3 (HIPK3), transcript variant X1, mRNA	-	-	-	-	GO:0031974//membrane-enclosed lumen;GO:0070013//intracellular organelle lumen;GO:0005634//nucleus;GO:0043233//organelle lumen;GO:0043226//organelle;GO:0044446//intracellular organelle part;GO:0044422//organelle part;GO:0005622//intracellular;GO:0043229//intracellular organelle;GO:0043231//intracellular membrane-bounded organelle;GO:0044428//nuclear part;GO:0005623//cell;GO:0016604//nuclear body;G…	GO:0032550//purine ribonucleoside binding;GO:0001883//purine nucleoside binding;GO:0004672//protein kinase activity;GO:0005488//binding;GO:0016301//kinase activity;GO:0097159//organic cyclic compound binding;GO:0016772//transferase activity, transferring phosphorus-containing groups;GO:0036094//small molecule binding;GO:0097367//carbohydrate derivative binding;GO:0016740//transferase activity;GO:…	GO:1902532//negative regulation of intracellular signal transduction;GO:0048585//negative regulation of response to stimulus;GO:1901362//organic cyclic compound biosynthetic process;GO:0050794//regulation of cellular process;GO:0023057//negative regulation of signaling;GO:0046483//heterocycle metabolic process;GO:0010605//negative regulation of macromolecule metabolic process;GO:1901576//organic …
XP_014335672	0	28.9133	0.001	1.99	10.9586	0.0045446	0.418554	no	BMP4	PREDICTED: bone morphogenetic protein 4 isoform X1 [Pantholops hodgsonii]	Cellular Processes;Environmental Information Processing	Signaling molecules and interaction;Signal transduction;Cellular commiunity	ko04060//Cytokine-cytokine receptor interaction;ko04390//Hippo signaling pathway;ko04550//Signaling pathways regulating pluripotency of stem cells;ko04350//TGF-beta signaling pathway;ko04340//Hedgehog signaling pathway	K04662	-	-	-
XP_005901724	0	15.9533	0.001	1.98667	10.9561	0.0160532	0.736038	no	METTL1	tRNA (guanine-N(7)-)-methyltransferase [Bos taurus]	-	-	-	-	-	-	-
XM_005904443	0	12.9633	0.001	1.98	10.9513	0.0182375	0.768226	no	TMEM86B	PREDICTED: Bos mutus transmembrane protein 86B (TMEM86B), mRNA	Metabolism	Lipid metabolism	ko00565//Ether lipid metabolism	K18575	GO:0031224//intrinsic component of membrane;GO:0016020//membrane;GO:0044464//cell part;GO:0044424//intracellular part;GO:0005623//cell;GO:0005622//intracellular;GO:0044425//membrane part	GO:0016801//hydrolase activity, acting on ether bonds;GO:0003824//catalytic activity;GO:0016803//ether hydrolase activity;GO:0016787//hydrolase activity	GO:0071704//organic substance metabolic process;GO:0018904//ether metabolic process;GO:0044699//single-organism process;GO:0006662//glycerol ether metabolic process;GO:0044281//small molecule metabolic process;GO:0044710//single-organism metabolic process;GO:0008152//metabolic process
XP_005893233	0	40.1067	0.001	1.97667	10.9489	0.0143585	0.699596	no	FBXO24	PREDICTED: F-box only protein 24 isoform X2 [Bos mutus]	-	-	-	-	-	-	-
XP_005905995	0	36.67	0.001	1.97333	10.9464	0.00315315	0.347273	no	PDE1A	PREDICTED: calcium/calmodulin-dependent 3',5'-cyclic nucleotide phosphodiesterase 1A isoform X1 [Bos mutus]	Environmental Information Processing;Metabolism;Organismal Systems	Signal transduction;Nucleotide metabolism;Endocrine system	ko04020//Calcium signaling pathway;ko00230//Purine metabolism;ko04924//Renin secretion	K13755	-	GO:0016787//hydrolase activity;GO:0003824//catalytic activity;GO:0043169//cation binding;GO:0042578//phosphoric ester hydrolase activity;GO:0016788//hydrolase activity, acting on ester bonds;GO:0043167//ion binding;GO:0005488//binding	GO:0044699//single-organism process;GO:0009987//cellular process;GO:0044763//single-organism cellular process;GO:0007154//cell communication
XM_014477836	0	14.81	0.001	1.94333	10.9243	0.0147605	0.707027	no	GPX8	PREDICTED: Bos mutus glutathione peroxidase 8 (putative) (GPX8), transcript variant X3, mRNA	Metabolism;Organismal Systems	Endocrine system;Metabolism of other amino acids;Lipid metabolism	ko00590//Arachidonic acid metabolism;ko04918//Thyroid hormone synthesis;ko00480//Glutathione metabolism	K00432	GO:0012505//endomembrane system;GO:0044424//intracellular part;GO:0043226//organelle;GO:0005623//cell;GO:0044422//organelle part;GO:0044464//cell part;GO:0043229//intracellular organelle;GO:0031224//intrinsic component of membrane;GO:0016020//membrane;GO:0044446//intracellular organelle part;GO:0005622//intracellular;GO:0005783//endoplasmic reticulum;GO:0043231//intracellular membrane-bounded org…	GO:0003824//catalytic activity;GO:0004601//peroxidase activity;GO:0016491//oxidoreductase activity;GO:0016209//antioxidant activity;GO:0016684//oxidoreductase activity, acting on peroxide as acceptor	GO:0006950//response to stress;GO:0050896//response to stimulus;GO:1990748//cellular detoxification;GO:0044699//single-organism process;GO:0044710//single-organism metabolic process;GO:0098754//detoxification;GO:0009987//cellular process;GO:0008152//metabolic process;GO:0009636//response to toxic substance;GO:0006979//response to oxidative stress;GO:0042221//response to chemical
XP_005902045	0	50.96	0.001	1.94333	10.9243	0.0116157	0.646002	no	NSUN7	NOL1/NOP2/Sun domain family, member 7, isoform CRA_a [Mus musculus]	-	-	-	-	-	-	GO:0008152//metabolic process
XP_005907533	0	41.3167	0.001	1.94333	10.9243	0.00226125	0.301871	no	ZNF384	PREDICTED: zinc finger protein 384 isoform X1 [Bos mutus]	-	-	-	-	-	GO:0043169//cation binding;GO:0005488//binding;GO:0043167//ion binding	-
XP_005892622	0	58.3467	0.001	1.93333	10.9169	0.00969708	0.591276	no	CLCN3	PREDICTED: H(+)/Cl(-) exchange transporter 3 isoform X3 [Bos taurus]	-	-	-	-	GO:0045202//synapse;GO:0005623//cell;GO:0016023//cytoplasmic, membrane-bounded vesicle;GO:0005768//endosome;GO:0044422//organelle part;GO:0043231//intracellular membrane-bounded organelle;GO:0031410//cytoplasmic vesicle;GO:0044425//membrane part;GO:0043226//organelle;GO:0031982//vesicle;GO:0005886//plasma membrane;GO:0005737//cytoplasm;GO:0044456//synapse part;GO:0031988//membrane-bounded vesicle…	GO:0015108//chloride transmembrane transporter activity;GO:0005216//ion channel activity;GO:0019904//protein domain specific binding;GO:0005225//volume-sensitive anion channel activity;GO:0015075//ion transmembrane transporter activity;GO:0005515//protein binding;GO:0005253//anion channel activity;GO:0005488//binding;GO:0015103//inorganic anion transmembrane transporter activity;GO:0005215//trans…	GO:0051234//establishment of localization;GO:0032535//regulation of cellular component size;GO:0034762//regulation of transmembrane transport;GO:0006811//ion transport;GO:0050789//regulation of biological process;GO:0009987//cellular process;GO:0051179//localization;GO:0032879//regulation of localization;GO:0006884//cell volume homeostasis;GO:0006821//chloride transport;GO:0044763//single-organis…
XP_005899454	0	94.3067	0.001	1.90667	10.8968	0.000414053	0.111111	no	PDZD8	PREDICTED: PDZ domain-containing protein 8 [Bos mutus]	-	-	-	-	-	GO:0005488//binding;GO:0043167//ion binding;GO:0043169//cation binding	GO:0016043//cellular component organization;GO:0044763//single-organism cellular process;GO:0000902//cell morphogenesis;GO:0048869//cellular developmental process;GO:0044767//single-organism developmental process;GO:0007165//signal transduction;GO:0051716//cellular response to stimulus;GO:0044699//single-organism process;GO:0032502//developmental process;GO:0050794//regulation of cellular process…
XP_014337721	0	97.78	0.001	1.90333	10.8943	0.00464016	0.421482	no	TMEM94	TPA: lethal (2) k05819-like [Bos taurus]	-	-	-	-	GO:0016020//membrane;GO:0044425//membrane part;GO:0031224//intrinsic component of membrane	-	-
XM_005904032	0	49.1133	0.001	1.89667	10.8893	0.0015862	0.251815	no	ZFX	PREDICTED: Bos mutus zinc finger protein, X-linked (ZFX), transcript variant X2, mRNA	-	-	-	-	-	-	-
XP_005898666	0	19.6533	0.001	1.88667	10.8816	0.00863826	0.560145	no	NUP37	PREDICTED: nucleoporin Nup37 [Bos mutus]	Genetic Information Processing	Translation	ko03013//RNA transport	K14302	GO:0005635//nuclear envelope;GO:0043226//organelle;GO:0043231//intracellular membrane-bounded organelle;GO:0044428//nuclear part;GO:0012505//endomembrane system;GO:0005623//cell;GO:0005622//intracellular;GO:0031981//nuclear lumen;GO:0043233//organelle lumen;GO:0031975//envelope;GO:0005634//nucleus;GO:0043227//membrane-bounded organelle;GO:0044464//cell part;GO:0043234//protein complex;GO:0031967/…	-	-
XM_005890928	0	43.6333	0.001	1.87333	10.8714	0.0141836	0.695619	no	LOC102267380	PREDICTED: Bos mutus liver carboxylesterase (LOC102267380), transcript variant X2, mRNA	Metabolism	Xenobiotics biodegradation and metabolism	ko00983//Drug metabolism - other enzymes	K01044	-	-	-
XP_014338625	0	19.2367	0.001	1.86667	10.8662	0.0110389	0.629285	no	GET4	PREDICTED: Golgi to ER traffic protein 4 homolog [Bos mutus]	-	-	-	-	-	-	-
XM_005892285	0	105.573	0.001	1.86	10.8611	0.00410815	0.397033	no	SUCO	PREDICTED: Bos mutus SUN domain containing ossification factor (SUCO), transcript variant X3, mRNA	-	-	-	-	GO:0005622//intracellular;GO:0043227//membrane-bounded organelle;GO:0012505//endomembrane system;GO:0044446//intracellular organelle part;GO:0005623//cell;GO:0044432//endoplasmic reticulum part;GO:0042175//nuclear outer membrane-endoplasmic reticulum membrane network;GO:0044444//cytoplasmic part;GO:0043229//intracellular organelle;GO:0005789//endoplasmic reticulum membrane;GO:0044464//cell part;G…	-	GO:0030154//cell differentiation;GO:0044767//single-organism developmental process;GO:0044707//single-multicellular organism process;GO:0050789//regulation of biological process;GO:0048518//positive regulation of biological process;GO:0010604//positive regulation of macromolecule metabolic process;GO:0009893//positive regulation of metabolic process;GO:0044763//single-organism cellular process;GO…
XP_005909486	0	16.8767	0.001	1.86	10.8611	0.0422957	1	no	DNAJB7	PREDICTED: dnaJ homolog subfamily B member 7 [Bos mutus]	-	-	-	-	-	-	-
XP_005896832	0	29.54	0.001	1.85667	10.8585	0.0204013	0.802959	no	SERGEF	secretion-regulating guanine nucleotide exchange factor [Bos taurus]	-	-	-	-	GO:0043229//intracellular organelle;GO:0043227//membrane-bounded organelle;GO:0044424//intracellular part;GO:0043231//intracellular membrane-bounded organelle;GO:0005622//intracellular;GO:0005623//cell;GO:0044464//cell part;GO:0043226//organelle	-	GO:0033036//macromolecule localization;GO:0050790//regulation of catalytic activity;GO:0043087//regulation of GTPase activity;GO:0006810//transport;GO:0009987//cellular process;GO:0044763//single-organism cellular process;GO:0046903//secretion;GO:0065007//biological regulation;GO:0015031//protein transport;GO:0071702//organic substance transport;GO:0044699//single-organism process;GO:0065009//reg…
XP_005908250	0	35.7733	0.001	1.85333	10.8559	0.000166908	0.0705888	no	SBSN	PREDICTED: suprabasin [Bos mutus]	-	-	-	-	-	-	-
XP_005903990	0	32.59	0.001	1.84	10.8455	0.000422538	0.112816	no	WDR20	PREDICTED: WD repeat-containing protein 20 isoform X5 [Bos mutus]	-	-	-	-	-	-	-
XP_005887249	0	95.2567	0.001	1.83667	10.8429	0.00029481	0.0916921	no	USP47	PREDICTED: ubiquitin carboxyl-terminal hydrolase 47 isoform X3 [Bos mutus]	-	-	-	-	-	-	-
XM_005903674	0	50.82	0.001	1.83333	10.8403	0.000158677	0.068199	no	GSKIP	PREDICTED: Bos mutus GSK3B interacting protein (GSKIP), transcript variant X1, mRNA	-	-	-	-	-	-	-
XM_014480105	0	116.65	0.001	1.83	10.8376	0.000174895	0.0728017	no	CTDSP2	PREDICTED: Bos mutus CTD (carboxy-terminal domain, RNA polymerase II, polypeptide A) small phosphatase 2 (CTDSP2), transcript variant X3, mRNA	-	-	-	-	-	-	-
Unigene014459	0	9	0.001	1.81	10.8218	0.0249093	0.851091	no	Unigene014459	PREDICTED: proline-rich protein 2-like [Ovis aries musimon]	-	-	-	-	-	-	-
XP_005899735	0	9.59667	0.001	1.81	10.8218	0.0260889	0.867083	no	RASL10B	ras-like protein family member 10B [Bos taurus]	-	-	-	-	GO:0016020//membrane;GO:0005623//cell;GO:0044464//cell part	GO:0005488//binding;GO:0032549//ribonucleoside binding;GO:0032550//purine ribonucleoside binding;GO:0097159//organic cyclic compound binding;GO:0097367//carbohydrate derivative binding;GO:0036094//small molecule binding;GO:1901363//heterocyclic compound binding;GO:0001883//purine nucleoside binding;GO:0001882//nucleoside binding	GO:0008015//blood circulation;GO:0002791//regulation of peptide secretion;GO:0050886//endocrine process;GO:0090087//regulation of peptide transport;GO:0009987//cellular process;GO:0065007//biological regulation;GO:0044763//single-organism cellular process;GO:0032501//multicellular organismal process;GO:0003008//system process;GO:0050789//regulation of biological process;GO:0023052//signaling;GO:0…
XP_014339043	0	12.08	0.001	1.80667	10.8191	0.0209876	0.803435	no	TTC38	Tetratricopeptide repeat protein 38, partial [Bos mutus]	-	-	-	-	-	-	-
XM_005894759	0	38.5233	0.001	1.8	10.8138	0.0164331	0.743664	no	PDCD4	PREDICTED: Bos mutus programmed cell death 4 (neoplastic transformation inhibitor) (PDCD4), transcript variant X2, mRNA	-	-	-	-	GO:0044422//organelle part;GO:0044424//intracellular part;GO:0043227//membrane-bounded organelle;GO:0005623//cell;GO:0005622//intracellular;GO:0005634//nucleus;GO:0044444//cytoplasmic part;GO:0031981//nuclear lumen;GO:0005737//cytoplasm;GO:0043226//organelle;GO:0070013//intracellular organelle lumen;GO:0043231//intracellular membrane-bounded organelle;GO:0044446//intracellular organelle part;GO:0…	-	GO:0010467//gene expression;GO:1901360//organic cyclic compound metabolic process;GO:0048869//cellular developmental process;GO:0034645//cellular macromolecule biosynthetic process;GO:1901576//organic substance biosynthetic process;GO:0019438//aromatic compound biosynthetic process;GO:0008152//metabolic process;GO:0009058//biosynthetic process;GO:0032502//developmental process;GO:0044767//single-…
XM_005893319	0	27.1733	0.001	1.79667	10.8111	0.000549307	0.130807	no	PALM2	PREDICTED: Bos mutus paralemmin 2 (PALM2), mRNA	-	-	-	-	GO:0016020//membrane	-	-
XM_014476300	0	10.8033	0.001	1.78333	10.8004	0.030443	0.919247	no	RPS7	PREDICTED: Bos mutus ribosomal protein S7 (RPS7), transcript variant X3, mRNA	Genetic Information Processing	Translation	ko03010//Ribosome	K02993	GO:0043230//extracellular organelle;GO:0043227//membrane-bounded organelle;GO:0043231//intracellular membrane-bounded organelle;GO:0043232//intracellular non-membrane-bounded organelle;GO:0044444//cytoplasmic part;GO:0043229//intracellular organelle;GO:0043233//organelle lumen;GO:0044424//intracellular part;GO:1903561//extracellular vesicle;GO:0005840//ribosome;GO:0044428//nuclear part;GO:0031982…	GO:0003676//nucleic acid binding;GO:0003723//RNA binding;GO:1901363//heterocyclic compound binding;GO:0097159//organic cyclic compound binding;GO:0005488//binding	GO:0006401//RNA catabolic process;GO:0006886//intracellular protein transport;GO:1901566//organonitrogen compound biosynthetic process;GO:0006605//protein targeting;GO:0006810//transport;GO:0032501//multicellular organismal process;GO:1902578//single-organism localization;GO:0000956//nuclear-transcribed mRNA catabolic process;GO:0034655//nucleobase-containing compound catabolic process;GO:0016043…
XP_005908810	0	18.0733	0.001	1.78333	10.8004	0.0392375	0.99613	no	PRPS1L1	PREDICTED: ribose-phosphate pyrophosphokinase 1-like [Bos mutus]	Metabolism	Carbohydrate metabolism;Global and Overview;Nucleotide metabolism	ko00230//Purine metabolism;ko01200//Carbon metabolism;ko01230//Biosynthesis of amino acids;ko00030//Pentose phosphate pathway	K00948	GO:0044464//cell part;GO:0044424//intracellular part;GO:0044444//cytoplasmic part;GO:1902494//catalytic complex;GO:0032991//macromolecular complex;GO:0005623//cell;GO:0005622//intracellular;GO:0005737//cytoplasm;GO:0061695//transferase complex, transferring phosphorus-containing groups;GO:1990234//transferase complex;GO:0043234//protein complex	GO:0046983//protein dimerization activity;GO:0016772//transferase activity, transferring phosphorus-containing groups;GO:0032550//purine ribonucleoside binding;GO:0036094//small molecule binding;GO:0046872//metal ion binding;GO:0043169//cation binding;GO:0001882//nucleoside binding;GO:0001883//purine nucleoside binding;GO:0016778//diphosphotransferase activity;GO:0043167//ion binding;GO:0097159//…	GO:0044281//small molecule metabolic process;GO:0006144//purine nucleobase metabolic process;GO:0006796//phosphate-containing compound metabolic process;GO:1901564//organonitrogen compound metabolic process;GO:0032502//developmental process;GO:0009987//cellular process;GO:0009117//nucleotide metabolic process;GO:0006807//nitrogen compound metabolic process;GO:0006163//purine nucleotide metabolic …
XP_005886821	0	18.77	0.001	1.76333	10.7841	0.0376179	0.980202	no	THOC6	PREDICTED: THO complex subunit 6 homolog isoform X1 [Bos mutus]	Genetic Information Processing	Translation	ko03013//RNA transport	K13175	GO:0043233//organelle lumen;GO:0032991//macromolecular complex;GO:0043232//intracellular non-membrane-bounded organelle;GO:0031981//nuclear lumen;GO:0044422//organelle part;GO:0005634//nucleus;GO:0070013//intracellular organelle lumen;GO:0031974//membrane-enclosed lumen;GO:0044424//intracellular part;GO:0005622//intracellular;GO:0043226//organelle;GO:0043231//intracellular membrane-bounded organe…	-	GO:0051179//localization;GO:0051649//establishment of localization in cell;GO:0007399//nervous system development;GO:0051236//establishment of RNA localization;GO:0050657//nucleic acid transport;GO:0043170//macromolecule metabolic process;GO:0009987//cellular process;GO:0010467//gene expression;GO:0008152//metabolic process;GO:0051234//establishment of localization;GO:0033036//macromolecule local…
XP_014335330	0	16.38	0.001	1.75667	10.7786	0.0442669	1	no	FKRP	Fukutin-related protein [Bos mutus]	-	-	-	-	GO:0043234//protein complex;GO:0043229//intracellular organelle;GO:0044425//membrane part;GO:0044444//cytoplasmic part;GO:0016020//membrane;GO:0005737//cytoplasm;GO:0044424//intracellular part;GO:0032991//macromolecular complex;GO:0043226//organelle;GO:0005783//endoplasmic reticulum;GO:0090665//glycoprotein complex;GO:0005622//intracellular;GO:0012505//endomembrane system;GO:0071944//cell periphe…	-	GO:0044723//single-organism carbohydrate metabolic process;GO:0009100//glycoprotein metabolic process;GO:0044267//cellular protein metabolic process;GO:0044238//primary metabolic process;GO:0006464//cellular protein modification process;GO:0034645//cellular macromolecule biosynthetic process;GO:0043413//macromolecule glycosylation;GO:0044710//single-organism metabolic process;GO:0070085//glycosyl…
XP_005903268	0	9.02333	0.001	1.75	10.7731	0.0339306	0.957366	no	TRIB2	PREDICTED: tribbles homolog 2 isoform X2 [Bos mutus]	-	-	-	-	-	-	-
XP_005908372	0	67.7767	0.001	1.75	10.7731	0.00790698	0.53453	no	USP28	PREDICTED: ubiquitin carboxyl-terminal hydrolase 28 isoform X2 [Bos mutus]	-	-	-	-	-	-	-
XM_005892526	0	43.6733	0.001	1.74	10.7649	0.0141848	0.695619	no	FXR1	PREDICTED: Bos mutus fragile X mental retardation, autosomal homolog 1 (FXR1), transcript variant X1, mRNA	Genetic Information Processing	Translation	ko03013//RNA transport	K15516	-	-	-
XP_005887986	0	23.0067	0.001	1.74	10.7649	0.0298146	0.912652	no	ZCCHC3	PREDICTED: zinc finger CCHC domain-containing protein 3 [Bos mutus]	-	-	-	-	-	GO:0043169//cation binding;GO:0003723//RNA binding;GO:1901363//heterocyclic compound binding;GO:0003676//nucleic acid binding;GO:0043167//ion binding;GO:0005488//binding;GO:0046872//metal ion binding;GO:0097159//organic cyclic compound binding;GO:0046914//transition metal ion binding	-
XM_005907330	0	74.4167	0.001	1.72	10.7482	0.000624349	0.143682	no	SIRT1	PREDICTED: Bos mutus sirtuin 1 (SIRT1), transcript variant X2, mRNA	Organismal Systems;Environmental Information Processing	Signal transduction;Endocrine system	ko04068//FoxO signaling pathway;ko04152//AMPK signaling pathway;ko04922//Glucagon signaling pathway	K11411	GO:0070013//intracellular organelle lumen;GO:0031090//organelle membrane;GO:0005623//cell;GO:0019866//organelle inner membrane;GO:0044427//chromosomal part;GO:0016020//membrane;GO:0043234//protein complex;GO:0044464//cell part;GO:0044424//intracellular part;GO:0005654//nucleoplasm;GO:0043232//intracellular non-membrane-bounded organelle;GO:0043228//non-membrane-bounded organelle;GO:0031519//PcG p…	GO:0000975//regulatory region DNA binding;GO:0000976//transcription regulatory region sequence-specific DNA binding;GO:0019899//enzyme binding;GO:0034979//NAD-dependent protein deacetylase activity;GO:0003824//catalytic activity;GO:1990837//sequence-specific double-stranded DNA binding;GO:0003690//double-stranded DNA binding;GO:0051427//hormone receptor binding;GO:0000988//transcription factor ac…	GO:0034654//nucleobase-containing compound biosynthetic process;GO:0048609//multicellular organismal reproductive process;GO:0010941//regulation of cell death;GO:0065007//biological regulation;GO:0070647//protein modification by small protein conjugation or removal;GO:0019222//regulation of metabolic process;GO:1902275//regulation of chromatin organization;GO:0051336//regulation of hydrolase acti…
XM_005907529	0	55.7967	0.001	1.71667	10.7454	3.83e-05	0.0263006	up	ZNF385B	PREDICTED: Bos mutus zinc finger protein 385B (ZNF385B), transcript variant X3, mRNA	-	-	-	-	GO:0043229//intracellular organelle;GO:0043231//intracellular membrane-bounded organelle;GO:0044464//cell part;GO:0005623//cell;GO:0044424//intracellular part;GO:0043226//organelle;GO:0043227//membrane-bounded organelle;GO:0005622//intracellular	GO:0097159//organic cyclic compound binding;GO:0043167//ion binding;GO:0005488//binding;GO:0046872//metal ion binding;GO:0046914//transition metal ion binding;GO:0043169//cation binding;GO:0005515//protein binding	GO:0023052//signaling;GO:0044700//single organism signaling;GO:0065007//biological regulation;GO:0050896//response to stimulus;GO:0035556//intracellular signal transduction;GO:0072331//signal transduction by p53 class mediator;GO:0007165//signal transduction;GO:0051716//cellular response to stimulus;GO:0050789//regulation of biological process;GO:0007154//cell communication;GO:0044763//single-org…
XP_005903072	0	20.1067	0.001	1.71667	10.7454	0.00905937	0.574249	no	APTX	PREDICTED: aprataxin isoform X1 [Bos mutus]	-	-	-	-	GO:0044424//intracellular part;GO:0043231//intracellular membrane-bounded organelle;GO:0031974//membrane-enclosed lumen;GO:0031981//nuclear lumen;GO:0044446//intracellular organelle part;GO:0005623//cell;GO:0005634//nucleus;GO:0044422//organelle part;GO:0044464//cell part;GO:0043226//organelle;GO:0043228//non-membrane-bounded organelle;GO:0044427//chromosomal part;GO:0043232//intracellular non-me…	GO:0098518//polynucleotide phosphatase activity;GO:0043167//ion binding;GO:0003723//RNA binding;GO:0008409//5'-3' exonuclease activity;GO:1901363//heterocyclic compound binding;GO:0016895//exodeoxyribonuclease activity, producing 5'-phosphomonoesters;GO:0004518//nuclease activity;GO:0016791//phosphatase activity;GO:0016796//exonuclease activity, active with either ribo- or deoxyribonucleic acids …	GO:0051716//cellular response to stimulus;GO:0006807//nitrogen compound metabolic process;GO:0006139//nucleobase-containing compound metabolic process;GO:0050896//response to stimulus;GO:0065008//regulation of biological quality;GO:0006950//response to stress;GO:0098501//polynucleotide dephosphorylation;GO:0006796//phosphate-containing compound metabolic process;GO:0042221//response to chemical;G…
XP_005893388	0	23.4	0.001	1.70333	10.7341	0.0293012	0.90612	no	ACTL7B	PREDICTED: actin-like protein 7B [Bos mutus]	-	-	-	-	GO:0043228//non-membrane-bounded organelle;GO:0044424//intracellular part;GO:0005622//intracellular;GO:0043226//organelle;GO:0044464//cell part;GO:0043232//intracellular non-membrane-bounded organelle;GO:0005623//cell;GO:0043229//intracellular organelle	-	-
XM_005886785	0	29.2233	0.001	1.69333	10.7257	0.00602112	0.474731	no	SLC9A3R2	PREDICTED: Bos mutus solute carrier family 9, subfamily A (NHE3, cation proton antiporter 3), member 3 regulator 2 (SLC9A3R2), transcript variant X2, mRNA	Organismal Systems	Excretory system	ko04960//Aldosterone-regulated sodium reabsorption	K13358	GO:0005924//cell-substrate adherens junction;GO:0043226//organelle;GO:0005576//extracellular region;GO:0043230//extracellular organelle;GO:1903561//extracellular vesicle;GO:0005912//adherens junction;GO:0070161//anchoring junction;GO:0043227//membrane-bounded organelle;GO:0016020//membrane;GO:0030054//cell junction;GO:0030055//cell-substrate junction;GO:0044421//extracellular region part;GO:00319…	GO:0005488//binding;GO:0005515//protein binding;GO:0019899//enzyme binding	-
XP_005895833	0	14.1967	0.001	1.69333	10.7257	0.0161795	0.739065	no	CCDC121	PREDICTED: coiled-coil domain-containing protein 121 [Bos mutus]	-	-	-	-	-	-	-
XP_005897145	0	24.4167	0.001	1.69333	10.7257	0.00694736	0.502932	no	SEPSECS	PREDICTED: O-phosphoseryl-tRNA(Sec) selenium transferase [Bos mutus]	Genetic Information Processing;Metabolism	Translation;Metabolism of other amino acids	ko00970//Aminoacyl-tRNA biosynthesis;ko00450//Selenocompound metabolism	K03341	GO:0005622//intracellular;GO:0005623//cell;GO:0043231//intracellular membrane-bounded organelle;GO:0043227//membrane-bounded organelle;GO:0043226//organelle;GO:0044464//cell part;GO:0043229//intracellular organelle;GO:0044424//intracellular part	GO:1901363//heterocyclic compound binding;GO:0003824//catalytic activity;GO:0016740//transferase activity;GO:0005488//binding;GO:0097159//organic cyclic compound binding;GO:0003676//nucleic acid binding	GO:0051171//regulation of nitrogen compound metabolic process;GO:0044249//cellular biosynthetic process;GO:0019222//regulation of metabolic process;GO:0044267//cellular protein metabolic process;GO:0006451//translational readthrough;GO:0006399//tRNA metabolic process;GO:0050794//regulation of cellular process;GO:0019538//protein metabolic process;GO:0060255//regulation of macromolecule metabolic …
XP_005905080	0	25.7033	0.001	1.68333	10.7171	0.0263152	0.870557	no	NR1H2	PREDICTED: oxysterols receptor LXR-beta isoform X2 [Bos mutus]	-	-	-	-	GO:0043227//membrane-bounded organelle;GO:0043226//organelle;GO:0043231//intracellular membrane-bounded organelle;GO:0043229//intracellular organelle;GO:0005623//cell;GO:0005622//intracellular;GO:0044464//cell part;GO:0044424//intracellular part	GO:0000976//transcription regulatory region sequence-specific DNA binding;GO:0003677//DNA binding;GO:0046914//transition metal ion binding;GO:0042974//retinoic acid receptor binding;GO:0000981//RNA polymerase II transcription factor activity, sequence-specific DNA binding;GO:0044212//transcription regulatory region DNA binding;GO:0038023//signaling receptor activity;GO:0005488//binding;GO:0005515…	GO:0006810//transport;GO:0006631//fatty acid metabolic process;GO:0043933//macromolecular complex subunit organization;GO:1901576//organic substance biosynthetic process;GO:0055088//lipid homeostasis;GO:0044249//cellular biosynthetic process;GO:0031326//regulation of cellular biosynthetic process;GO:0006807//nitrogen compound metabolic process;GO:0048878//chemical homeostasis;GO:0045184//establis…
XM_014476700	0	10.28	0.001	1.67	10.7056	0.0053796	0.453877	no	LOC102266537	PREDICTED: Bos mutus transmembrane protein 205 (LOC102266537), transcript variant X6, mRNA	-	-	-	-	GO:0043227//membrane-bounded organelle;GO:0016020//membrane;GO:0043230//extracellular organelle;GO:0044421//extracellular region part;GO:0031224//intrinsic component of membrane;GO:0031982//vesicle;GO:0043226//organelle;GO:0044425//membrane part;GO:0005576//extracellular region;GO:1903561//extracellular vesicle	-	-
XP_005908034	0.01	43.8633	0.001	1.67	10.7056	0.00195815	0.279777	no	EXOC7	PREDICTED: exocyst complex component 7 isoform X3 [Bos mutus]	Organismal Systems	Endocrine system	ko04910//Insulin signaling pathway	K07195	GO:0030426//growth cone;GO:0044464//cell part;GO:0042995//cell projection;GO:0044422//organelle part;GO:0005622//intracellular;GO:0044430//cytoskeletal part;GO:0044446//intracellular organelle part;GO:0005813//centrosome;GO:0015630//microtubule cytoskeleton;GO:0044463//cell projection part;GO:0005856//cytoskeleton;GO:0043226//organelle;GO:0043229//intracellular organelle;GO:0043232//intracellular…	-	GO:0040012//regulation of locomotion;GO:0065007//biological regulation;GO:0050789//regulation of biological process;GO:0051234//establishment of localization;GO:0051179//localization;GO:0016192//vesicle-mediated transport;GO:0006810//transport
XP_005889838	0.113333	182.977	0.001	1.65667	10.6941	8.14e-05	0.0417633	up	CHD6	PREDICTED: chromodomain-helicase-DNA-binding protein 6 [Bos mutus]	-	-	-	-	GO:0055029//nuclear DNA-directed RNA polymerase complex;GO:0043229//intracellular organelle;GO:0005623//cell;GO:1990234//transferase complex;GO:0070013//intracellular organelle lumen;GO:0061695//transferase complex, transferring phosphorus-containing groups;GO:0044446//intracellular organelle part;GO:0044428//nuclear part;GO:0043227//membrane-bounded organelle;GO:0016591//DNA-directed RNA polymer…	GO:0016817//hydrolase activity, acting on acid anhydrides;GO:0036094//small molecule binding;GO:0003824//catalytic activity;GO:0016787//hydrolase activity;GO:0097159//organic cyclic compound binding;GO:1901363//heterocyclic compound binding;GO:0016887//ATPase activity;GO:0097367//carbohydrate derivative binding;GO:0005488//binding;GO:0032549//ribonucleoside binding;GO:0001882//nucleoside binding;…	GO:0050896//response to stimulus;GO:0048518//positive regulation of biological process;GO:0051173//positive regulation of nitrogen compound metabolic process;GO:0051171//regulation of nitrogen compound metabolic process;GO:0045944//positive regulation of transcription from RNA polymerase II promoter;GO:0043620//regulation of DNA-templated transcription in response to stress;GO:1903506//regulation…
XP_014333967	0	27.09	0.001	1.65333	10.6912	0.0017096	0.259707	no	ZDHHC1	PREDICTED: probable palmitoyltransferase ZDHHC1 isoform X2 [Bubalus bubalis]	-	-	-	-	GO:0031224//intrinsic component of membrane;GO:0005576//extracellular region;GO:0044425//membrane part;GO:0043226//organelle;GO:0031982//vesicle;GO:0043227//membrane-bounded organelle;GO:1903561//extracellular vesicle;GO:0043230//extracellular organelle;GO:0044421//extracellular region part;GO:0016020//membrane	GO:0046914//transition metal ion binding;GO:0043169//cation binding;GO:0003824//catalytic activity;GO:0016747//transferase activity, transferring acyl groups other than amino-acyl groups;GO:0016740//transferase activity;GO:0046872//metal ion binding;GO:0016746//transferase activity, transferring acyl groups;GO:0016409//palmitoyltransferase activity;GO:0043167//ion binding;GO:0005488//binding	GO:0008152//metabolic process;GO:1901576//organic substance biosynthetic process;GO:0009059//macromolecule biosynthetic process;GO:0006497//protein lipidation;GO:0019538//protein metabolic process;GO:0044237//cellular metabolic process;GO:0042157//lipoprotein metabolic process;GO:0009058//biosynthetic process;GO:0036211//protein modification process;GO:0043170//macromolecule metabolic process;GO:…
XM_014477191	0	22.5633	0.001	1.63	10.6707	0.00846535	0.556617	no	FGL1	PREDICTED: Bos mutus fibrinogen-like 1 (FGL1), transcript variant X2, mRNA	-	-	-	-	-	-	-
XP_014337275	0	84.7867	0.001	1.63	10.6707	0.00570136	0.468144	no	MYBBP1A	Myb-binding protein 1A [Bos mutus]	-	-	-	-	GO:0043226//organelle;GO:0043229//intracellular organelle;GO:0005634//nucleus;GO:0031974//membrane-enclosed lumen;GO:0043233//organelle lumen;GO:0031074//nucleocytoplasmic shuttling complex;GO:0044446//intracellular organelle part;GO:0044422//organelle part;GO:0031981//nuclear lumen;GO:0043234//protein complex;GO:0044464//cell part;GO:0070013//intracellular organelle lumen;GO:0032991//macromolecu…	GO:0003824//catalytic activity;GO:0003712//transcription cofactor activity;GO:0003676//nucleic acid binding;GO:0003723//RNA binding;GO:0016772//transferase activity, transferring phosphorus-containing groups;GO:1901363//heterocyclic compound binding;GO:0000988//transcription factor activity, protein binding;GO:0016779//nucleotidyltransferase activity;GO:0034061//DNA polymerase activity;GO:0000989…	GO:0071496//cellular response to external stimulus;GO:0065007//biological regulation;GO:0009059//macromolecule biosynthetic process;GO:0034645//cellular macromolecule biosynthetic process;GO:0006091//generation of precursor metabolites and energy;GO:0006259//DNA metabolic process;GO:0006807//nitrogen compound metabolic process;GO:0044271//cellular nitrogen compound biosynthetic process;GO:0022900…
XP_014336948	0.00333333	31.2933	0.001	1.61333	10.6558	0.0210503	0.803483	no	ARID3B	AT-rich interactive domain-containing protein 3B [Bos mutus]	-	-	-	-	GO:0043229//intracellular organelle;GO:0031974//membrane-enclosed lumen;GO:0070013//intracellular organelle lumen;GO:0005623//cell;GO:0043233//organelle lumen;GO:0043226//organelle;GO:0044464//cell part;GO:0044446//intracellular organelle part;GO:0044424//intracellular part;GO:0043227//membrane-bounded organelle;GO:0044428//nuclear part;GO:0044422//organelle part;GO:0005622//intracellular;GO:0031…	GO:0000977//RNA polymerase II regulatory region sequence-specific DNA binding;GO:0000975//regulatory region DNA binding;GO:1901363//heterocyclic compound binding;GO:0043565//sequence-specific DNA binding;GO:0003676//nucleic acid binding;GO:0001012//RNA polymerase II regulatory region DNA binding;GO:0000976//transcription regulatory region sequence-specific DNA binding;GO:0003677//DNA binding;GO:0…	GO:0008152//metabolic process;GO:0097659//nucleic acid-templated transcription;GO:1901360//organic cyclic compound metabolic process;GO:0006351//transcription, DNA-templated;GO:0006807//nitrogen compound metabolic process;GO:1901362//organic cyclic compound biosynthetic process;GO:0046483//heterocycle metabolic process;GO:0016070//RNA metabolic process;GO:0034645//cellular macromolecule biosynthe…
XP_005898937	0	78.5167	0.001	1.60333	10.6469	0.00634869	0.485005	no	NPC1	PREDICTED: niemann-Pick C1 protein isoform X1 [Bos mutus]	Cellular Processes	Transport and catabolism	ko04142//Lysosome	K12385	GO:0043227//membrane-bounded organelle;GO:0005773//vacuole;GO:0043229//intracellular organelle;GO:0012505//endomembrane system;GO:1903561//extracellular vesicle;GO:0016020//membrane;GO:0005737//cytoplasm;GO:0044421//extracellular region part;GO:0044424//intracellular part;GO:0005886//plasma membrane;GO:0044425//membrane part;GO:0005623//cell;GO:0005622//intracellular;GO:0098857//membrane microdom…	GO:0005496//steroid binding;GO:0005488//binding;GO:0008289//lipid binding;GO:0032934//sterol binding;GO:0097159//organic cyclic compound binding	GO:0044403//symbiosis, encompassing mutualism through parasitism;GO:0071840//cellular component organization or biogenesis;GO:0048878//chemical homeostasis;GO:0048518//positive regulation of biological process;GO:0044708//single-organism behavior;GO:0006464//cellular protein modification process;GO:0050789//regulation of biological process;GO:0010876//lipid localization;GO:0050794//regulation of …
XP_005908066	0	7.38667	0.001	1.59333	10.6378	0.0392772	0.99613	no	CYGB	cytoglobin [Bos taurus]	-	-	-	-	GO:0005623//cell;GO:0036477//somatodendritic compartment;GO:0044464//cell part;GO:0042995//cell projection;GO:0097458//neuron part	GO:0046906//tetrapyrrole binding;GO:0043167//ion binding;GO:0046914//transition metal ion binding;GO:0097159//organic cyclic compound binding;GO:0046872//metal ion binding;GO:0043169//cation binding;GO:1901363//heterocyclic compound binding;GO:0005488//binding	GO:0051179//localization;GO:1902578//single-organism localization;GO:0006810//transport;GO:0015669//gas transport;GO:0051234//establishment of localization;GO:0044765//single-organism transport;GO:0044699//single-organism process
XM_005897638	0	23.88	0.001	1.59	10.6348	0.00863052	0.560145	no	ACTG2	PREDICTED: Bos mutus actin, gamma 2, smooth muscle, enteric (ACTG2), transcript variant X2, mRNA	Organismal Systems	Circulatory system	ko04270//Vascular smooth muscle contraction	K12315	GO:0016459//myosin complex;GO:0043234//protein complex;GO:1903561//extracellular vesicle;GO:0005623//cell;GO:0044430//cytoskeletal part;GO:0043228//non-membrane-bounded organelle;GO:0031252//cell leading edge;GO:0098858//actin-based cell projection;GO:0044446//intracellular organelle part;GO:0005856//cytoskeleton;GO:0044464//cell part;GO:0031982//vesicle;GO:0043230//extracellular organelle;GO:004…	GO:1901363//heterocyclic compound binding;GO:0036094//small molecule binding;GO:0097159//organic cyclic compound binding;GO:0001883//purine nucleoside binding;GO:0032549//ribonucleoside binding;GO:0032550//purine ribonucleoside binding;GO:0097367//carbohydrate derivative binding;GO:0001882//nucleoside binding;GO:0005488//binding	GO:0048729//tissue morphogenesis;GO:0072132//mesenchyme morphogenesis;GO:0044767//single-organism developmental process;GO:0010467//gene expression;GO:0009887//animal organ morphogenesis;GO:0003008//system process;GO:0009888//tissue development;GO:0009653//anatomical structure morphogenesis;GO:0044699//single-organism process;GO:0048731//system development;GO:0071704//organic substance metabolic …
XP_014335604	0	32.9867	0.001	1.58333	10.6287	0.0180059	0.763558	no	KHSRP	PREDICTED: far upstream element-binding protein 2 [Bos mutus]	-	-	-	-	GO:0032991//macromolecular complex;GO:0031974//membrane-enclosed lumen;GO:0043227//membrane-bounded organelle;GO:0036464//cytoplasmic ribonucleoprotein granule;GO:0070013//intracellular organelle lumen;GO:0044428//nuclear part;GO:0035770//ribonucleoprotein granule;GO:0005623//cell;GO:0044446//intracellular organelle part;GO:0043226//organelle;GO:0044464//cell part;GO:0044424//intracellular part;G…	GO:0044822//poly(A) RNA binding;GO:0097159//organic cyclic compound binding;GO:0005488//binding;GO:1901363//heterocyclic compound binding;GO:0003723//RNA binding;GO:0003676//nucleic acid binding	GO:0044260//cellular macromolecule metabolic process;GO:0006725//cellular aromatic compound metabolic process;GO:0006401//RNA catabolic process;GO:0050794//regulation of cellular process;GO:0080090//regulation of primary metabolic process;GO:0031323//regulation of cellular metabolic process;GO:0019219//regulation of nucleobase-containing compound metabolic process;GO:1901575//organic substance ca…
XP_014337517	0	69.73	0.001	1.58333	10.6287	0.00076762	0.162321	no	TOP3B	PREDICTED: DNA topoisomerase 3-beta-1 [Bos mutus]	Genetic Information Processing	Replication and repair	ko03460//Fanconi anemia pathway;ko03440//Homologous recombination	K03165	GO:0044464//cell part;GO:0043231//intracellular membrane-bounded organelle;GO:0043229//intracellular organelle;GO:0005622//intracellular;GO:0043227//membrane-bounded organelle;GO:0005623//cell;GO:0043226//organelle;GO:0044424//intracellular part	GO:0003723//RNA binding;GO:0016853//isomerase activity;GO:1901363//heterocyclic compound binding;GO:0003916//DNA topoisomerase activity;GO:0003824//catalytic activity;GO:0003676//nucleic acid binding;GO:0097159//organic cyclic compound binding;GO:0005488//binding	GO:1901360//organic cyclic compound metabolic process;GO:0044260//cellular macromolecule metabolic process;GO:0006259//DNA metabolic process;GO:0034641//cellular nitrogen compound metabolic process;GO:0008152//metabolic process;GO:0006139//nucleobase-containing compound metabolic process;GO:0006807//nitrogen compound metabolic process;GO:0044237//cellular metabolic process;GO:0006725//cellular ar…
Unigene043569	0	5.33333	0.001	1.57	10.6165	0.0263558	0.871356	no	Unigene043569	PREDICTED: LOW QUALITY PROTEIN: TMF-regulated nuclear protein 1 isoform X1 [Bos taurus]	-	-	-	-	GO:0005694//chromosome;GO:0044422//organelle part;GO:0044446//intracellular organelle part;GO:0043233//organelle lumen;GO:0031981//nuclear lumen;GO:0044428//nuclear part;GO:0043226//organelle;GO:0043232//intracellular non-membrane-bounded organelle;GO:0043231//intracellular membrane-bounded organelle;GO:0005634//nucleus;GO:0005622//intracellular;GO:0044464//cell part;GO:0043228//non-membrane-boun…	GO:0005488//binding;GO:0003676//nucleic acid binding;GO:1901363//heterocyclic compound binding;GO:0097159//organic cyclic compound binding	GO:0019438//aromatic compound biosynthetic process;GO:0048731//system development;GO:0007049//cell cycle;GO:0044249//cellular biosynthetic process;GO:0009653//anatomical structure morphogenesis;GO:0006351//transcription, DNA-templated;GO:0043170//macromolecule metabolic process;GO:0044260//cellular macromolecule metabolic process;GO:1901360//organic cyclic compound metabolic process;GO:0048856//a…
XP_005892926	0	17.1867	0.001	1.57	10.6165	0.0138594	0.687961	no	LOC102269633	PREDICTED: 2-acylglycerol O-acyltransferase 3-like [Bos mutus]	Organismal Systems;Metabolism	Digestive system;Lipid metabolism	ko00561//Glycerolipid metabolism;ko04975//Fat digestion and absorption	K14456	GO:0031224//intrinsic component of membrane;GO:0044425//membrane part;GO:0016020//membrane	GO:0003824//catalytic activity;GO:0016740//transferase activity;GO:0016746//transferase activity, transferring acyl groups	-
XP_005891759	0.02	54.05	0.001	1.55333	10.6012	0.00247399	0.312194	no	FAM13B	PREDICTED: protein FAM13B isoform X1 [Bos mutus]	-	-	-	-	-	-	GO:0044763//single-organism cellular process;GO:0022411//cellular component disassembly;GO:0006996//organelle organization;GO:0007154//cell communication;GO:0016236//macroautophagy;GO:0071840//cellular component organization or biogenesis;GO:0000422//mitophagy;GO:0006914//autophagy;GO:0009987//cellular process;GO:1903008//organelle disassembly;GO:1902589//single-organism organelle organization;GO…
XP_005910431	0.0866667	140.337	0.00333333	5.16	10.5962	0.00265501	0.318874	no	DNAAF5	PREDICTED: HEAT repeat-containing protein 2 [Bos mutus]	-	-	-	-	GO:0005623//cell;GO:0044424//intracellular part;GO:0044464//cell part;GO:0005622//intracellular	GO:0005488//binding;GO:0005515//protein binding;GO:0045502//dynein binding	GO:0030031//cell projection assembly;GO:0000902//cell morphogenesis;GO:0044085//cellular component biogenesis;GO:1902589//single-organism organelle organization;GO:0070925//organelle assembly;GO:0016043//cellular component organization;GO:0000226//microtubule cytoskeleton organization;GO:0009653//anatomical structure morphogenesis;GO:0044763//single-organism cellular process;GO:0006996//organelle…
XM_014482152	0	34.82	0.001	1.54667	10.5949	0.0186007	0.771235	no	TMUB2	PREDICTED: Bos mutus transmembrane and ubiquitin-like domain containing 2 (TMUB2), transcript variant X4, mRNA	-	-	-	-	GO:0031224//intrinsic component of membrane;GO:0044425//membrane part;GO:0016020//membrane	-	-
XP_005896310	0	19.0667	0.001	1.54667	10.5949	0.00896789	0.571634	no	SGMS2	phosphatidylcholine:ceramide cholinephosphotransferase 2 [Bos taurus]	Metabolism;Environmental Information Processing	Signal transduction;Lipid metabolism	ko04071//Sphingolipid signaling pathway;ko00600//Sphingolipid metabolism	K04714	GO:0005622//intracellular;GO:0043226//organelle;GO:0016020//membrane;GO:0071944//cell periphery;GO:0044446//intracellular organelle part;GO:0005886//plasma membrane;GO:0044464//cell part;GO:0044425//membrane part;GO:0043227//membrane-bounded organelle;GO:0044422//organelle part;GO:0044431//Golgi apparatus part;GO:0005623//cell;GO:0005737//cytoplasm;GO:0044444//cytoplasmic part;GO:0031224//intrins…	GO:0016772//transferase activity, transferring phosphorus-containing groups;GO:0016740//transferase activity;GO:0016780//phosphotransferase activity, for other substituted phosphate groups;GO:0003824//catalytic activity	GO:0006644//phospholipid metabolic process;GO:0006665//sphingolipid metabolic process;GO:0006807//nitrogen compound metabolic process;GO:0044238//primary metabolic process;GO:0071704//organic substance metabolic process;GO:1901564//organonitrogen compound metabolic process;GO:0019637//organophosphate metabolic process;GO:0043603//cellular amide metabolic process;GO:0006643//membrane lipid metabol…
XM_014479172	0	29.8967	0.001	1.52667	10.5762	0.0212112	0.803977	no	LOC102265903	PREDICTED: Bos mutus heterogeneous nuclear ribonucleoprotein F (LOC102265903), transcript variant X11, mRNA	-	-	-	-	GO:0043231//intracellular membrane-bounded organelle;GO:0044424//intracellular part;GO:0031974//membrane-enclosed lumen;GO:0043233//organelle lumen;GO:0044422//organelle part;GO:1990904//ribonucleoprotein complex;GO:0044423//virion part;GO:0005622//intracellular;GO:0031981//nuclear lumen;GO:0005623//cell;GO:0044464//cell part;GO:0043227//membrane-bounded organelle;GO:0019012//virion;GO:0032991//m…	GO:0005515//protein binding;GO:0005488//binding;GO:0003723//RNA binding;GO:0003676//nucleic acid binding;GO:0097159//organic cyclic compound binding;GO:1901363//heterocyclic compound binding;GO:0008134//transcription factor binding	GO:0016070//RNA metabolic process;GO:0006725//cellular aromatic compound metabolic process;GO:0010467//gene expression;GO:1901360//organic cyclic compound metabolic process;GO:0006139//nucleobase-containing compound metabolic process;GO:0044260//cellular macromolecule metabolic process;GO:0044237//cellular metabolic process;GO:0044238//primary metabolic process;GO:0071704//organic substance metab…
XP_005894108	0	48.18	0.001	1.50667	10.5571	0.0125456	0.663889	no	MAP3K11	PREDICTED: mitogen-activated protein kinase kinase kinase 11 isoform X2 [Bos mutus]	Environmental Information Processing	Signal transduction	ko04010//MAPK signaling pathway	K04419	-	-	-
XP_005893637	0	5.22333	0.001	1.50333	10.5539	0.0396351	1	no	CNRIP1	CB1 cannabinoid receptor-interacting protein 1 [Bos taurus]	-	-	-	-	-	-	-
Unigene011574	0	4.33333	0.001	1.5	10.5507	0.031323	0.933423	no	Unigene011574	Nipped-B-like B, partial [Cuculus canorus]	-	-	-	-	-	-	-
XM_005909142	0	75.3567	0.001	1.48	10.5314	0.00673046	0.499334	no	TOPORS	PREDICTED: Bos mutus topoisomerase I binding, arginine/serine-rich, E3 ubiquitin protein ligase (TOPORS), transcript variant X2, mRNA	-	-	-	-	GO:0005856//cytoskeleton;GO:0005819//spindle;GO:0044464//cell part;GO:0043234//protein complex;GO:0044422//organelle part;GO:0031981//nuclear lumen;GO:0042995//cell projection;GO:0005815//microtubule organizing center;GO:0043229//intracellular organelle;GO:0016604//nuclear body;GO:0005929//cilium;GO:0031513//nonmotile primary cilium;GO:0043232//intracellular non-membrane-bounded organelle;GO:0044…	GO:0005515//protein binding;GO:1901363//heterocyclic compound binding;GO:0046914//transition metal ion binding;GO:0003824//catalytic activity;GO:0004842//ubiquitin-protein transferase activity;GO:0046872//metal ion binding;GO:0043167//ion binding;GO:0008092//cytoskeletal protein binding;GO:0043169//cation binding;GO:0015631//tubulin binding;GO:0019899//enzyme binding;GO:0005488//binding;GO:001674…	GO:1901360//organic cyclic compound metabolic process;GO:0097193//intrinsic apoptotic signaling pathway;GO:0016070//RNA metabolic process;GO:0048518//positive regulation of biological process;GO:0044267//cellular protein metabolic process;GO:0050789//regulation of biological process;GO:0019538//protein metabolic process;GO:0008104//protein localization;GO:0071704//organic substance metabolic proc…
XM_014481181	0	45.13	0.001	1.47333	10.5249	0.002505	0.312194	no	DCAF11	PREDICTED: Bos mutus DDB1 and CUL4 associated factor 11 (DCAF11), transcript variant X5, mRNA	-	-	-	-	GO:0032991//macromolecular complex;GO:0005623//cell;GO:0000151//ubiquitin ligase complex;GO:0044424//intracellular part;GO:1902494//catalytic complex;GO:0031461//cullin-RING ubiquitin ligase complex;GO:0043234//protein complex;GO:0005622//intracellular;GO:1990234//transferase complex;GO:0044464//cell part	-	GO:0043170//macromolecule metabolic process;GO:0036211//protein modification process;GO:0009987//cellular process;GO:0008152//metabolic process;GO:0044260//cellular macromolecule metabolic process;GO:0043412//macromolecule modification;GO:0019538//protein metabolic process;GO:0044237//cellular metabolic process;GO:0044238//primary metabolic process;GO:0006464//cellular protein modification proces…
XP_005892093	0	18.99	0.001	1.47	10.5216	0.00892172	0.571001	no	CERS5	PREDICTED: ceramide synthase 5 [Bos mutus]	Metabolism;Environmental Information Processing	Signal transduction;Lipid metabolism	ko04071//Sphingolipid signaling pathway;ko00600//Sphingolipid metabolism	K04710	GO:0005622//intracellular;GO:0016020//membrane;GO:0044425//membrane part;GO:0043229//intracellular organelle;GO:0043226//organelle;GO:0031224//intrinsic component of membrane;GO:0044464//cell part;GO:0043227//membrane-bounded organelle;GO:0043231//intracellular membrane-bounded organelle;GO:0044424//intracellular part;GO:0005623//cell	GO:0016747//transferase activity, transferring acyl groups other than amino-acyl groups;GO:0003824//catalytic activity;GO:0016746//transferase activity, transferring acyl groups;GO:0016410//N-acyltransferase activity;GO:0016740//transferase activity	GO:0044237//cellular metabolic process;GO:0044255//cellular lipid metabolic process;GO:0044763//single-organism cellular process;GO:0071704//organic substance metabolic process;GO:0006672//ceramide metabolic process;GO:0034641//cellular nitrogen compound metabolic process;GO:0006629//lipid metabolic process;GO:0009987//cellular process;GO:0006807//nitrogen compound metabolic process;GO:0006665//s…
XM_014481037	0	16.6167	0.001	1.45	10.5018	0.0432834	1	no	DTNBP1	PREDICTED: Bos mutus dystrobrevin binding protein 1 (DTNBP1), transcript variant X2, mRNA	-	-	-	-	GO:0031082//BLOC complex;GO:0044433//cytoplasmic vesicle part;GO:0097708//intracellular vesicle;GO:0012506//vesicle membrane;GO:0005623//cell;GO:0012505//endomembrane system;GO:0097458//neuron part;GO:0099503//secretory vesicle;GO:0044437//vacuolar part;GO:0098590//plasma membrane region;GO:0043234//protein complex;GO:0098588//bounding membrane of organelle;GO:0005622//intracellular;GO:0044459//p…	GO:0005488//binding	GO:0065007//biological regulation;GO:0007165//signal transduction;GO:0051246//regulation of protein metabolic process;GO:1902582//single-organism intracellular transport;GO:0071702//organic substance transport;GO:0048731//system development;GO:0050794//regulation of cellular process;GO:0032502//developmental process;GO:0051338//regulation of transferase activity;GO:0051937//catecholamine transpor…
XP_005903321	0	7.45333	0.001	1.44667	10.4985	0.0366769	0.974513	no	TANGO2	PREDICTED: transport and Golgi organization protein 2 homolog isoform X3 [Bos mutus]	-	-	-	-	-	-	-
XM_014479469	0	87.2633	0.001	1.43333	10.4852	0.000598002	0.138655	no	KIF3B	PREDICTED: Bos mutus kinesin family member 3B (KIF3B), transcript variant X2, mRNA	-	-	-	-	-	-	-
XM_005902030	0	15.6433	0.001	1.43	10.4818	0.0466706	1	no	NDUFAF5	PREDICTED: Bos mutus NADH dehydrogenase (ubiquinone) complex I, assembly factor 5 (NDUFAF5), mRNA	-	-	-	-	GO:0031975//envelope;GO:0005740//mitochondrial envelope;GO:0043229//intracellular organelle;GO:0005623//cell;GO:0031090//organelle membrane;GO:0005739//mitochondrion;GO:0044422//organelle part;GO:0005622//intracellular;GO:0031967//organelle envelope;GO:0043227//membrane-bounded organelle;GO:0043231//intracellular membrane-bounded organelle;GO:0044444//cytoplasmic part;GO:0043226//organelle;GO:003…	GO:0016740//transferase activity;GO:0003824//catalytic activity;GO:0016741//transferase activity, transferring one-carbon groups	GO:0070271//protein complex biogenesis;GO:0010257//NADH dehydrogenase complex assembly;GO:0022607//cellular component assembly;GO:0034622//cellular macromolecular complex assembly;GO:0043933//macromolecular complex subunit organization;GO:0044085//cellular component biogenesis;GO:0043623//cellular protein complex assembly;GO:0065003//macromolecular complex assembly;GO:0006461//protein complex ass…
XP_005900632	0	15.1833	0.001	1.42	10.4717	0.0449552	1	no	NDRG2	PREDICTED: protein NDRG2-like isoform X7 [Bos mutus]	-	-	-	-	GO:0043228//non-membrane-bounded organelle;GO:0044430//cytoskeletal part;GO:0031981//nuclear lumen;GO:0043227//membrane-bounded organelle;GO:0044464//cell part;GO:0044446//intracellular organelle part;GO:0070013//intracellular organelle lumen;GO:0044444//cytoplasmic part;GO:0005622//intracellular;GO:0005815//microtubule organizing center;GO:0005576//extracellular region;GO:0043005//neuron project…	-	GO:0023057//negative regulation of signaling;GO:0009966//regulation of signal transduction;GO:0010605//negative regulation of macromolecule metabolic process;GO:0051239//regulation of multicellular organismal process;GO:0032268//regulation of cellular protein metabolic process;GO:0060322//head development;GO:0048523//negative regulation of cellular process;GO:0043409//negative regulation of MAPK …
XP_005901315	0	29.3233	0.001	1.42	10.4717	0.0228287	0.833386	no	KLHL7	PREDICTED: LOW QUALITY PROTEIN: kelch-like protein 7 [Bos mutus]	-	-	-	-	-	-	-
XP_005904966	0	19.1567	0.001	1.41	10.4615	0.0369671	0.974513	no	DCAF11	PREDICTED: DDB1- and CUL4-associated factor 11 isoform X6 [Bos mutus]	-	-	-	-	GO:0005623//cell;GO:0005622//intracellular;GO:0044464//cell part;GO:0044424//intracellular part;GO:0031461//cullin-RING ubiquitin ligase complex;GO:0000151//ubiquitin ligase complex;GO:0032991//macromolecular complex;GO:1990234//transferase complex;GO:1902494//catalytic complex;GO:0043234//protein complex	-	GO:0044238//primary metabolic process;GO:0006464//cellular protein modification process;GO:0044260//cellular macromolecule metabolic process;GO:0009987//cellular process;GO:0036211//protein modification process;GO:0008152//metabolic process;GO:0019538//protein metabolic process;GO:0043412//macromolecule modification;GO:0044267//cellular protein metabolic process;GO:0071704//organic substance meta…
XM_005909017	0	41.4367	0.001	1.40667	10.4581	0.00253918	0.312194	no	LOC102281216	PREDICTED: Bos mutus scaffold attachment factor B1 (LOC102281216), mRNA	-	-	-	-	-	GO:0005488//binding;GO:0097159//organic cyclic compound binding	-
XM_014483222	0	17.8167	0.001	1.4	10.4512	0.0402865	1	no	NXT1	PREDICTED: Bos mutus nuclear transport factor 2-like export factor 1 (NXT1), transcript variant X1, mRNA	Genetic Information Processing	Translation	ko03013//RNA transport;ko03015//mRNA surveillance pathway;ko03008//Ribosome biogenesis in eukaryotes	K14285	GO:0043231//intracellular membrane-bounded organelle;GO:0031974//membrane-enclosed lumen;GO:0005623//cell;GO:0044451//nucleoplasm part;GO:0005654//nucleoplasm;GO:0044428//nuclear part;GO:0043227//membrane-bounded organelle;GO:0043233//organelle lumen;GO:0012505//endomembrane system;GO:0044422//organelle part;GO:0044424//intracellular part;GO:0031975//envelope;GO:0044446//intracellular organelle p…	GO:0017016//Ras GTPase binding;GO:0005515//protein binding;GO:0051020//GTPase binding;GO:0019899//enzyme binding;GO:0005488//binding;GO:0031267//small GTPase binding	GO:0051234//establishment of localization;GO:0070727//cellular macromolecule localization;GO:0033036//macromolecule localization;GO:0050657//nucleic acid transport;GO:0006403//RNA localization;GO:0050658//RNA transport;GO:0034613//cellular protein localization;GO:0006886//intracellular protein transport;GO:0015031//protein transport;GO:0006810//transport;GO:0051641//cellular localization;GO:00717…
XP_005908956	0	47.6067	0.001	1.39333	10.4443	0.00176206	0.261379	no	PPP6R3	PREDICTED: serine/threonine-protein phosphatase 6 regulatory subunit 3 isoform X3 [Bos mutus]	-	-	-	-	GO:0005622//intracellular;GO:0044464//cell part;GO:0044424//intracellular part;GO:0016020//membrane;GO:0005623//cell	GO:0005515//protein binding;GO:0019899//enzyme binding;GO:0005488//binding;GO:0019902//phosphatase binding	GO:0050790//regulation of catalytic activity;GO:0019222//regulation of metabolic process;GO:0051336//regulation of hydrolase activity;GO:0065007//biological regulation;GO:0050794//regulation of cellular process;GO:0031323//regulation of cellular metabolic process;GO:0065009//regulation of molecular function;GO:0035303//regulation of dephosphorylation;GO:0051174//regulation of phosphorus metabolic…
XM_014479612	0	57.5567	0.001	1.38667	10.4374	0.00105092	0.194936	no	CCDC186	PREDICTED: Bos mutus coiled-coil domain containing 186 (CCDC186), transcript variant X2, mRNA	-	-	-	-	-	-	-
XP_005901677	0	38.0467	0.001	1.38667	10.4374	0.00302794	0.338418	no	ATF6B	PREDICTED: cyclic AMP-dependent transcription factor ATF-6 beta isoform X2 [Bos mutus]	Environmental Information Processing;Genetic Information Processing;Organismal Systems	Endocrine system;Folding, sorting and degradation;Nervous system;Signal transduction;Circulatory system	ko04151//PI3K-Akt signaling pathway;ko04261//Adrenergic signaling in cardiomyocytes;ko04022//cGMP - PKG signaling pathway;ko04141//Protein processing in endoplasmic reticulum;ko04728//Dopaminergic synapse;ko04668//TNF signaling pathway;ko04915//Estrogen signaling pathway;ko04925//Aldosterone synthesis and secretion;ko04911//Insulin secretion;ko04918//Thyroid hormone synthesis	K09049	GO:0005623//cell;GO:0043227//membrane-bounded organelle;GO:0032991//macromolecular complex;GO:0044464//cell part;GO:0044424//intracellular part;GO:0005622//intracellular;GO:0016020//membrane;GO:0043226//organelle;GO:0042175//nuclear outer membrane-endoplasmic reticulum membrane network;GO:0043229//intracellular organelle;GO:0043231//intracellular membrane-bounded organelle;GO:0012505//endomembran…	GO:0097159//organic cyclic compound binding;GO:0000975//regulatory region DNA binding;GO:1901363//heterocyclic compound binding;GO:0001067//regulatory region nucleic acid binding;GO:0003676//nucleic acid binding;GO:0003677//DNA binding;GO:0005488//binding;GO:0044212//transcription regulatory region DNA binding	GO:0023052//signaling;GO:0050896//response to stimulus;GO:0044249//cellular biosynthetic process;GO:0033554//cellular response to stress;GO:0034976//response to endoplasmic reticulum stress;GO:0051716//cellular response to stimulus;GO:0044763//single-organism cellular process;GO:0044271//cellular nitrogen compound biosynthetic process;GO:0007154//cell communication;GO:0050789//regulation of biolo…
XM_014478709	0	19.5267	0.001	1.37667	10.427	0.0020409	0.284676	no	RGS1	PREDICTED: Bos mutus regulator of G-protein signaling 1 (RGS1), transcript variant X2, mRNA	-	-	-	-	-	-	-
XM_014477195	0	64.5567	0.001	1.37	10.42	0.00742659	0.515587	no	CBFA2T3	PREDICTED: Bos mutus core-binding factor, runt domain, alpha subunit 2; translocated to, 3 (CBFA2T3), transcript variant X2, mRNA	-	-	-	-	-	-	-
XM_014477961	0	32	0.001	1.36667	10.4164	0.0205131	0.803243	no	LOC106700802	PREDICTED: Bos mutus filaggrin-like (LOC106700802), mRNA	-	-	-	-	-	-	-
XP_014333266	0	18.2	0.001	1.36667	10.4164	0.0110851	0.629285	no	ZFP1	PREDICTED: zinc finger protein 1 homolog isoform X1 [Bos taurus]	-	-	-	-	GO:0005623//cell;GO:0044464//cell part	GO:0043169//cation binding;GO:0043167//ion binding;GO:0005488//binding	GO:0018130//heterocycle biosynthetic process;GO:0010467//gene expression;GO:0032774//RNA biosynthetic process;GO:0009987//cellular process;GO:0006351//transcription, DNA-templated;GO:1901362//organic cyclic compound biosynthetic process;GO:0090304//nucleic acid metabolic process;GO:0006139//nucleobase-containing compound metabolic process;GO:0009059//macromolecule biosynthetic process;GO:0019438/…
XM_005909740	0	18.7767	0.001	1.36333	10.4129	0.0376045	0.980202	no	VDAC2	PREDICTED: Bos mutus voltage-dependent anion channel 2 (VDAC2), transcript variant X1, mRNA	Environmental Information Processing	Signal transduction	ko04020//Calcium signaling pathway;ko04022//cGMP - PKG signaling pathway	K15040	GO:0005739//mitochondrion;GO:0043227//membrane-bounded organelle;GO:0043226//organelle;GO:0044464//cell part;GO:0005737//cytoplasm;GO:0098857//membrane microdomain;GO:0044446//intracellular organelle part;GO:0044429//mitochondrial part;GO:0031090//organelle membrane;GO:0031224//intrinsic component of membrane;GO:0044424//intracellular part;GO:0098589//membrane region;GO:0031967//organelle envelop…	GO:0022838//substrate-specific channel activity;GO:0022836//gated channel activity;GO:0022803//passive transmembrane transporter activity;GO:0036094//small molecule binding;GO:0022891//substrate-specific transmembrane transporter activity;GO:0022832//voltage-gated channel activity;GO:0005216//ion channel activity;GO:0022892//substrate-specific transporter activity;GO:0005244//voltage-gated ion ch…	GO:0012501//programmed cell death;GO:0065007//biological regulation;GO:0050789//regulation of biological process;GO:0032879//regulation of localization;GO:0097193//intrinsic apoptotic signaling pathway;GO:0035556//intracellular signal transduction;GO:0043269//regulation of ion transport;GO:0050896//response to stimulus;GO:0044763//single-organism cellular process;GO:0007154//cell communication;GO…
XP_005889005	0	38.9067	0.001	1.36	10.4094	0.016284	0.740201	no	BAHD1	PREDICTED: bromo adjacent homology domain-containing 1 protein [Bos mutus]	-	-	-	-	-	-	-
XM_005892799	0	39.3333	0.001	1.35667	10.4059	0.00271593	0.323628	no	TRIM56	PREDICTED: Bos mutus tripartite motif containing 56 (TRIM56), mRNA	-	-	-	-	GO:0044424//intracellular part;GO:0005622//intracellular;GO:0044464//cell part;GO:0005623//cell	GO:0003676//nucleic acid binding;GO:0046914//transition metal ion binding;GO:0003824//catalytic activity;GO:0043169//cation binding;GO:0005488//binding;GO:0003723//RNA binding;GO:0097159//organic cyclic compound binding;GO:0043167//ion binding;GO:1901363//heterocyclic compound binding;GO:0046872//metal ion binding	GO:0002252//immune effector process;GO:0071704//organic substance metabolic process;GO:0042221//response to chemical;GO:0002376//immune system process;GO:0043170//macromolecule metabolic process;GO:0044238//primary metabolic process;GO:0016567//protein ubiquitination;GO:0006464//cellular protein modification process;GO:0000209//protein polyubiquitination;GO:0044237//cellular metabolic process;GO:…
XP_005904528	0	31.99	0.001	1.35667	10.4059	0.0205092	0.803243	no	POLR3E	PREDICTED: DNA-directed RNA polymerase III subunit RPC5 isoform X5 [Bos mutus]	Genetic Information Processing;Metabolism;Organismal Systems	Immune system;Transcription;Nucleotide metabolism	ko00230//Purine metabolism;ko00240//Pyrimidine metabolism;ko04623//Cytosolic DNA-sensing pathway;ko03020//RNA polymerase	K14721	GO:0043231//intracellular membrane-bounded organelle;GO:0005623//cell;GO:0005634//nucleus;GO:0044428//nuclear part;GO:0031981//nuclear lumen;GO:0031974//membrane-enclosed lumen;GO:0044464//cell part;GO:0043226//organelle;GO:0044446//intracellular organelle part;GO:0043229//intracellular organelle;GO:0043227//membrane-bounded organelle;GO:0044422//organelle part;GO:0005654//nucleoplasm;GO:0044451/…	-	GO:0071704//organic substance metabolic process;GO:0008152//metabolic process;GO:0043170//macromolecule metabolic process;GO:0010467//gene expression
XP_005910329	0	14.23	0.001	1.35333	10.4023	0.0170428	0.750807	no	VEZT	PREDICTED: vezatin, partial [Bos mutus]	-	-	-	-	GO:0044464//cell part;GO:0044425//membrane part;GO:0005623//cell;GO:0016020//membrane;GO:0005622//intracellular;GO:0031224//intrinsic component of membrane;GO:0044424//intracellular part	GO:0005488//binding;GO:0005515//protein binding;GO:0008092//cytoskeletal protein binding	GO:0044699//single-organism process;GO:0098602//single organism cell adhesion;GO:0007155//cell adhesion;GO:0022610//biological adhesion
XP_005890187	0	41.7167	0.001	1.35	10.3987	0.0137703	0.68547	no	NCOA7	PREDICTED: nuclear receptor coactivator 7 isoform X3 [Bos mutus]	-	-	-	-	-	GO:0005102//receptor binding;GO:0051427//hormone receptor binding;GO:0003713//transcription coactivator activity;GO:0000988//transcription factor activity, protein binding;GO:0005488//binding;GO:0003712//transcription cofactor activity;GO:0000989//transcription factor activity, transcription factor binding;GO:0005515//protein binding	GO:0019438//aromatic compound biosynthetic process;GO:0006725//cellular aromatic compound metabolic process;GO:0046483//heterocycle metabolic process;GO:0034645//cellular macromolecule biosynthetic process;GO:0032774//RNA biosynthetic process;GO:0071704//organic substance metabolic process;GO:0009987//cellular process;GO:0008152//metabolic process;GO:0044238//primary metabolic process;GO:0034641/…
XP_005899387	0	16.3633	0.001	1.35	10.3987	0.0442629	1	no	GNA13	PREDICTED: guanine nucleotide-binding protein subunit alpha-13 isoform X1 [Bos mutus]	Environmental Information Processing;Organismal Systems;Cellular Processes	Cell motility;Circulatory system;Signal transduction;Nervous system;Immune system	ko04810//Regulation of actin cytoskeleton;ko04022//cGMP - PKG signaling pathway;ko04270//Vascular smooth muscle contraction;ko04071//Sphingolipid signaling pathway;ko04611//Platelet activation;ko04730//Long-term depression	K04639	GO:0005623//cell;GO:0030055//cell-substrate junction;GO:0044421//extracellular region part;GO:0044424//intracellular part;GO:0005924//cell-substrate adherens junction;GO:0043226//organelle;GO:0005622//intracellular;GO:0043230//extracellular organelle;GO:0030054//cell junction;GO:0005576//extracellular region;GO:0043227//membrane-bounded organelle;GO:0016020//membrane;GO:0005912//adherens junction…	GO:0044877//macromolecular complex binding;GO:0005102//receptor binding;GO:0003824//catalytic activity;GO:0001882//nucleoside binding;GO:0016462//pyrophosphatase activity;GO:0097367//carbohydrate derivative binding;GO:0016818//hydrolase activity, acting on acid anhydrides, in phosphorus-containing anhydrides;GO:0005515//protein binding;GO:0097159//organic cyclic compound binding;GO:0032549//ribon…	GO:0009653//anatomical structure morphogenesis;GO:0006928//movement of cell or subcellular component;GO:0016477//cell migration;GO:0051716//cellular response to stimulus;GO:0072359//circulatory system development;GO:0040011//locomotion;GO:0007165//signal transduction;GO:0007275//multicellular organism development;GO:0048856//anatomical structure development;GO:0022604//regulation of cell morphoge…
XM_005894180	0	53.4633	0.001	1.34333	10.3916	0.00147738	0.239762	no	RNF220	PREDICTED: Bos mutus ring finger protein 220 (RNF220), transcript variant X2, mRNA	-	-	-	-	GO:0044424//intracellular part;GO:0005622//intracellular;GO:0044464//cell part;GO:0005623//cell	GO:0004842//ubiquitin-protein transferase activity;GO:0016740//transferase activity;GO:0043167//ion binding;GO:0003824//catalytic activity;GO:0046872//metal ion binding;GO:0043169//cation binding;GO:0005488//binding;GO:0019787//ubiquitin-like protein transferase activity;GO:0046914//transition metal ion binding	GO:0050789//regulation of biological process;GO:0044260//cellular macromolecule metabolic process;GO:0043412//macromolecule modification;GO:0071704//organic substance metabolic process;GO:0010647//positive regulation of cell communication;GO:0030177//positive regulation of Wnt signaling pathway;GO:0010646//regulation of cell communication;GO:0048584//positive regulation of response to stimulus;GO…
XP_014334610	0	23.06	0.001	1.34333	10.3916	0.0298098	0.912652	no	TMEM43	PREDICTED: transmembrane protein 43 [Bos mutus]	-	-	-	-	GO:0043226//organelle;GO:0005783//endoplasmic reticulum;GO:0044464//cell part;GO:0044424//intracellular part;GO:0031090//organelle membrane;GO:0005637//nuclear inner membrane;GO:0005622//intracellular;GO:0019866//organelle inner membrane;GO:0031224//intrinsic component of membrane;GO:0044422//organelle part;GO:0044446//intracellular organelle part;GO:0044425//membrane part;GO:0044444//cytoplasmic…	GO:0005488//binding;GO:0005515//protein binding	GO:0009987//cellular process;GO:0071840//cellular component organization or biogenesis;GO:0006998//nuclear envelope organization;GO:0044763//single-organism cellular process;GO:0016043//cellular component organization;GO:0010256//endomembrane system organization;GO:0044699//single-organism process;GO:0061024//membrane organization;GO:0044802//single-organism membrane organization;GO:0006996//orga…
XP_005895797	0	24.59	0.001	1.33667	10.3844	0.025207	0.853118	no	EIF2B4	PREDICTED: translation initiation factor eIF-2B subunit delta isoform X2 [Bos mutus]	Genetic Information Processing	Translation	ko03013//RNA transport	K03680	-	-	-
XM_005887659	0	56.0967	0.001	1.32333	10.37	0.0101628	0.607227	no	OTUD5	PREDICTED: Bos mutus OTU deubiquitinase 5 (OTUD5), transcript variant X3, mRNA	Organismal Systems	Immune system	ko04622//RIG-I-like receptor signaling pathway	K12655	GO:0005622//intracellular;GO:0044444//cytoplasmic part;GO:0005737//cytoplasm;GO:0044464//cell part;GO:0005623//cell;GO:0044424//intracellular part	GO:0008234//cysteine-type peptidase activity;GO:0019783//ubiquitin-like protein-specific protease activity;GO:0070011//peptidase activity, acting on L-amino acid peptides;GO:0036459//thiol-dependent ubiquitinyl hydrolase activity;GO:0008233//peptidase activity;GO:0003824//catalytic activity;GO:0101005//ubiquitinyl hydrolase activity;GO:0016787//hydrolase activity	GO:0044260//cellular macromolecule metabolic process;GO:0043412//macromolecule modification;GO:0019538//protein metabolic process;GO:0009607//response to biotic stimulus;GO:0065007//biological regulation;GO:0008152//metabolic process;GO:0071704//organic substance metabolic process;GO:0044267//cellular protein metabolic process;GO:0006508//proteolysis;GO:0051707//response to other organism;GO:0036…
XM_005889143	0	36.26	0.001	1.32	10.3663	0.000233477	0.0828372	no	CRHR2	PREDICTED: Bos mutus corticotropin releasing hormone receptor 2 (CRHR2), transcript variant X1, mRNA	Environmental Information Processing	Signaling molecules and interaction	ko04080//Neuroactive ligand-receptor interaction	K04579	GO:0044425//membrane part;GO:0016020//membrane;GO:0031224//intrinsic component of membrane	GO:0060089//molecular transducer activity;GO:0099600//transmembrane receptor activity;GO:0004888//transmembrane signaling receptor activity;GO:0038023//signaling receptor activity;GO:0004872//receptor activity;GO:0004871//signal transducer activity	GO:0044699//single-organism process;GO:0051716//cellular response to stimulus;GO:0007165//signal transduction;GO:0023052//signaling;GO:0050896//response to stimulus;GO:0044700//single organism signaling;GO:0065007//biological regulation;GO:0050794//regulation of cellular process;GO:0007154//cell communication;GO:0044763//single-organism cellular process;GO:0009987//cellular process;GO:0050789//re…
XM_005892068	0	39.6667	0.001	1.31667	10.3627	0.0144764	0.702103	no	PKD2L1	PREDICTED: Bos mutus polycystic kidney disease 2-like 1 (PKD2L1), transcript variant X1, mRNA	-	-	-	-	-	-	-
XP_005889885	0	6.68	0.001	1.31667	10.3627	0.0420052	1	no	FDX1	PREDICTED: adrenodoxin, mitochondrial-like [Bos mutus]	-	-	-	-	GO:0044444//cytoplasmic part;GO:0043229//intracellular organelle;GO:0005739//mitochondrion;GO:0043226//organelle;GO:0044429//mitochondrial part;GO:0044422//organelle part;GO:0044446//intracellular organelle part;GO:0005737//cytoplasm;GO:0044464//cell part;GO:0005622//intracellular;GO:0044424//intracellular part;GO:0005623//cell;GO:0043227//membrane-bounded organelle;GO:0043231//intracellular memb…	GO:0043169//cation binding;GO:0051540//metal cluster binding;GO:0051536//iron-sulfur cluster binding;GO:0046983//protein dimerization activity;GO:0005515//protein binding;GO:0043167//ion binding;GO:0005488//binding	GO:1901615//organic hydroxy compound metabolic process;GO:0006629//lipid metabolic process;GO:0071704//organic substance metabolic process;GO:0044710//single-organism metabolic process;GO:0009058//biosynthetic process;GO:0008202//steroid metabolic process;GO:0016125//sterol metabolic process;GO:1901360//organic cyclic compound metabolic process;GO:0008152//metabolic process;GO:0044238//primary me…
XP_005899287	0	33.6767	0.001	1.31667	10.3627	0.0192017	0.781641	no	KLHL11	PREDICTED: kelch-like protein 11 [Bos mutus]	-	-	-	-	-	-	-
XP_005898563	0	19.4667	0.001	1.31	10.3554	0.00902569	0.572801	no	ACP6	PREDICTED: lysophosphatidic acid phosphatase type 6 isoform X1 [Bos mutus]	-	-	-	-	GO:0005622//intracellular;GO:0043227//membrane-bounded organelle;GO:0043231//intracellular membrane-bounded organelle;GO:0044424//intracellular part;GO:0043229//intracellular organelle;GO:0043226//organelle;GO:0044464//cell part;GO:0005623//cell	GO:0016791//phosphatase activity;GO:0042578//phosphoric ester hydrolase activity;GO:0016788//hydrolase activity, acting on ester bonds;GO:0003824//catalytic activity;GO:0016787//hydrolase activity	GO:0044238//primary metabolic process;GO:0006644//phospholipid metabolic process;GO:0071704//organic substance metabolic process;GO:0006650//glycerophospholipid metabolic process;GO:0006796//phosphate-containing compound metabolic process;GO:0006793//phosphorus metabolic process;GO:0019637//organophosphate metabolic process;GO:0044237//cellular metabolic process;GO:0044699//single-organism proces…
XP_005896760	0	17.7067	0.001	1.29667	10.3406	0.0363807	0.974513	no	WDFY1	WD repeat and FYVE domain-containing protein 1 [Bos taurus]	-	-	-	-	GO:0012505//endomembrane system;GO:0043227//membrane-bounded organelle;GO:0043231//intracellular membrane-bounded organelle;GO:0005737//cytoplasm;GO:0005623//cell;GO:0044424//intracellular part;GO:0005773//vacuole;GO:0044464//cell part;GO:0043226//organelle;GO:0043229//intracellular organelle;GO:0044444//cytoplasmic part;GO:0005768//endosome;GO:0005622//intracellular	GO:0046872//metal ion binding;GO:0043167//ion binding;GO:0043169//cation binding;GO:0008289//lipid binding;GO:0046914//transition metal ion binding;GO:0035091//phosphatidylinositol binding;GO:0005488//binding;GO:0005543//phospholipid binding	GO:0050794//regulation of cellular process;GO:0023056//positive regulation of signaling;GO:0048522//positive regulation of cellular process;GO:0045088//regulation of innate immune response;GO:0010646//regulation of cell communication;GO:0034121//regulation of toll-like receptor signaling pathway;GO:0048518//positive regulation of biological process;GO:0048584//positive regulation of response to s…
XP_005896969	0	9.29	0.001	1.29333	10.3369	0.0267723	0.875253	no	MRO	PREDICTED: protein maestro isoform X2 [Bos mutus]	-	-	-	-	GO:0043231//intracellular membrane-bounded organelle;GO:0043227//membrane-bounded organelle;GO:0043229//intracellular organelle;GO:0005623//cell;GO:0044424//intracellular part;GO:0044464//cell part;GO:0005622//intracellular;GO:0043226//organelle	-	-
XP_014333968	0	70.1933	0.001	1.28333	10.3257	0.00662095	0.49461	no	EDC4	PREDICTED: enhancer of mRNA-decapping protein 4 [Bos mutus]	Genetic Information Processing	Folding, sorting and degradation	ko03018//RNA degradation	K12616	GO:0043231//intracellular membrane-bounded organelle;GO:0043226//organelle;GO:0044464//cell part;GO:0043227//membrane-bounded organelle;GO:0005622//intracellular;GO:0043229//intracellular organelle;GO:0044428//nuclear part;GO:0044422//organelle part;GO:0044424//intracellular part;GO:0005634//nucleus;GO:0031974//membrane-enclosed lumen;GO:0070013//intracellular organelle lumen;GO:0044446//intracel…	-	-
Unigene032671	0	4	0.001	1.27667	10.3182	0.0348243	0.962615	no	Unigene032671	PREDICTED: transcription initiation factor TFIID subunit 4-like [Lipotes vexillifer]	-	-	-	-	-	-	-
XP_005899537	0	31.4767	0.001	1.27667	10.3182	0.0200357	0.796962	no	PLCZ1	PREDICTED: 1-phosphatidylinositol 4,5-bisphosphate phosphodiesterase zeta-1 [Bos mutus]	Environmental Information Processing;Organismal Systems;Metabolism;Cellular Processes	Signal transduction;Endocrine system;Carbohydrate metabolism;Cell growth and death	ko04020//Calcium signaling pathway;ko04114//Oocyte meiosis;ko04919//Thyroid hormone signaling pathway;ko04070//Phosphatidylinositol signaling system;ko00562//Inositol phosphate metabolism	K05861	GO:0044464//cell part;GO:0043226//organelle;GO:0005623//cell;GO:0005737//cytoplasm;GO:0044444//cytoplasmic part;GO:0043231//intracellular membrane-bounded organelle;GO:0043229//intracellular organelle;GO:0044424//intracellular part;GO:0005622//intracellular;GO:0043227//membrane-bounded organelle	GO:0046872//metal ion binding;GO:0043167//ion binding;GO:0003824//catalytic activity;GO:0004620//phospholipase activity;GO:0016298//lipase activity;GO:0043169//cation binding;GO:0005488//binding;GO:0042578//phosphoric ester hydrolase activity;GO:0016787//hydrolase activity;GO:0016788//hydrolase activity, acting on ester bonds	GO:0044238//primary metabolic process;GO:0023052//signaling;GO:0050794//regulation of cellular process;GO:0044707//single-multicellular organism process;GO:0007154//cell communication;GO:0007165//signal transduction;GO:0051179//localization;GO:0000003//reproduction;GO:0072511//divalent inorganic cation transport;GO:0022414//reproductive process;GO:0019953//sexual reproduction;GO:0044710//single-o…
XM_005890908	0	36.4567	0.001	1.27	10.3106	0.000320233	0.0955778	no	PAMR1	PREDICTED: Bos mutus peptidase domain containing associated with muscle regeneration 1 (PAMR1), transcript variant X4, mRNA	-	-	-	-	-	GO:0005488//binding;GO:0043169//cation binding;GO:0046872//metal ion binding;GO:0043167//ion binding	GO:0071704//organic substance metabolic process;GO:0044238//primary metabolic process;GO:0043170//macromolecule metabolic process;GO:0019538//protein metabolic process;GO:0008152//metabolic process
XP_005909777	0	23.4233	0.001	1.27	10.3106	0.0293046	0.90612	no	PTBP1	polypyrimidine tract-binding protein 1 isoform 2 [Bos taurus]	-	-	-	-	GO:0043226//organelle;GO:0043230//extracellular organelle;GO:1903561//extracellular vesicle;GO:0043229//intracellular organelle;GO:0031982//vesicle;GO:0005576//extracellular region;GO:0043227//membrane-bounded organelle;GO:0044464//cell part;GO:0005622//intracellular;GO:0044421//extracellular region part;GO:0005623//cell;GO:0044424//intracellular part;GO:0043231//intracellular membrane-bounded or…	GO:0003723//RNA binding;GO:0097159//organic cyclic compound binding;GO:0005488//binding;GO:0003676//nucleic acid binding;GO:1901363//heterocyclic compound binding	GO:0016071//mRNA metabolic process;GO:0000380//alternative mRNA splicing, via spliceosome;GO:0043170//macromolecule metabolic process;GO:0048869//cellular developmental process;GO:0044763//single-organism cellular process;GO:0016070//RNA metabolic process;GO:0044238//primary metabolic process;GO:0010467//gene expression;GO:1901360//organic cyclic compound metabolic process;GO:0006397//mRNA proces…
XP_014332102	0	32.88	0.001	1.26	10.2992	0.0180111	0.763558	no	SAMD4B	PREDICTED: protein Smaug homolog 2 [Bos mutus]	-	-	-	-	GO:0005623//cell;GO:0043231//intracellular membrane-bounded organelle;GO:0044464//cell part;GO:0043229//intracellular organelle;GO:0005622//intracellular;GO:0043227//membrane-bounded organelle;GO:0044424//intracellular part;GO:0043226//organelle	GO:0003676//nucleic acid binding;GO:0097159//organic cyclic compound binding;GO:1901363//heterocyclic compound binding;GO:0005488//binding;GO:0003723//RNA binding	GO:1901576//organic substance biosynthetic process;GO:0006139//nucleobase-containing compound metabolic process;GO:0008152//metabolic process;GO:0044260//cellular macromolecule metabolic process;GO:0010467//gene expression;GO:0071704//organic substance metabolic process;GO:0034654//nucleobase-containing compound biosynthetic process;GO:0032774//RNA biosynthetic process;GO:0016070//RNA metabolic p…
XM_005887666	0	15.56	0.001	1.25667	10.2954	0.0141355	0.695619	no	PQBP1	PREDICTED: Bos mutus polyglutamine binding protein 1 (PQBP1), transcript variant X5, mRNA	Genetic Information Processing	Transcription	ko03040//Spliceosome	K12865	GO:0016604//nuclear body;GO:0005622//intracellular;GO:0043228//non-membrane-bounded organelle;GO:0042995//cell projection;GO:0043227//membrane-bounded organelle;GO:0044422//organelle part;GO:0005623//cell;GO:0044451//nucleoplasm part;GO:0043231//intracellular membrane-bounded organelle;GO:0044430//cytoskeletal part;GO:0031981//nuclear lumen;GO:0043232//intracellular non-membrane-bounded organelle…	GO:0005488//binding;GO:1901363//heterocyclic compound binding;GO:0003676//nucleic acid binding;GO:0044877//macromolecular complex binding;GO:0005515//protein binding;GO:0097159//organic cyclic compound binding;GO:0000988//transcription factor activity, protein binding;GO:0000989//transcription factor activity, transcription factor binding;GO:0003712//transcription cofactor activity	GO:0065003//macromolecular complex assembly;GO:0010467//gene expression;GO:0016043//cellular component organization;GO:0065007//biological regulation;GO:0016071//mRNA metabolic process;GO:0008152//metabolic process;GO:0050794//regulation of cellular process;GO:1901360//organic cyclic compound metabolic process;GO:0048869//cellular developmental process;GO:0044238//primary metabolic process;GO:003…
XP_005901542	0	25.2133	0.001	1.24667	10.2839	0.0245384	0.846933	no	RNPEPL1	PREDICTED: LOW QUALITY PROTEIN: arginyl aminopeptidase-like 1 isoform X1, partial [Bos taurus]	-	-	-	-	-	-	-
XP_005910051	0	20.8733	0.001	1.24667	10.2839	0.0328485	0.945742	no	GLUD1	PREDICTED: LOW QUALITY PROTEIN: glutamate dehydrogenase 1, mitochondrial [Bison bison bison]	Metabolism;Organismal Systems	Amino acid metabolism;Metabolism of other amino acids;Energy metabolism;Excretory system;Global and Overview	ko01200//Carbon metabolism;ko00250//Alanine, aspartate and glutamate metabolism;ko04964//Proximal tubule bicarbonate reclamation;ko00220//Arginine biosynthesis;ko00910//Nitrogen metabolism;ko00471//D-Glutamine and D-glutamate metabolism	K00261	GO:0044446//intracellular organelle part;GO:0005740//mitochondrial envelope;GO:0019866//organelle inner membrane;GO:0031967//organelle envelope;GO:0044424//intracellular part;GO:0044429//mitochondrial part;GO:0043229//intracellular organelle;GO:0005739//mitochondrion;GO:0043226//organelle;GO:0043231//intracellular membrane-bounded organelle;GO:0005737//cytoplasm;GO:0031090//organelle membrane;GO:…	GO:0036094//small molecule binding;GO:0016639//oxidoreductase activity, acting on the CH-NH2 group of donors, NAD or NADP as acceptor;GO:0001882//nucleoside binding;GO:0032549//ribonucleoside binding;GO:0043168//anion binding;GO:0032550//purine ribonucleoside binding;GO:0016597//amino acid binding;GO:0001883//purine nucleoside binding;GO:0005488//binding;GO:0003824//catalytic activity;GO:0031406/…	GO:1901564//organonitrogen compound metabolic process;GO:1901605//alpha-amino acid metabolic process;GO:0070201//regulation of establishment of protein localization;GO:0051223//regulation of protein transport;GO:0019752//carboxylic acid metabolic process;GO:1903530//regulation of secretion by cell;GO:0050796//regulation of insulin secretion;GO:0032879//regulation of localization;GO:0050896//respo…
XP_005905438	0	15.69	0.001	1.24333	10.28	0.0466408	1	no	PCYT2	PREDICTED: ethanolamine-phosphate cytidylyltransferase [Bos mutus]	Metabolism	Lipid metabolism	ko00564//Glycerophospholipid metabolism	K00967	GO:0012505//endomembrane system;GO:0016020//membrane;GO:0044464//cell part;GO:0042175//nuclear outer membrane-endoplasmic reticulum membrane network;GO:0005623//cell	GO:0016772//transferase activity, transferring phosphorus-containing groups;GO:0003824//catalytic activity;GO:0070567//cytidylyltransferase activity;GO:0016779//nucleotidyltransferase activity;GO:0016740//transferase activity	GO:0071704//organic substance metabolic process;GO:0044763//single-organism cellular process;GO:0044710//single-organism metabolic process;GO:0046337//phosphatidylethanolamine metabolic process;GO:0044699//single-organism process;GO:0044237//cellular metabolic process;GO:0046486//glycerolipid metabolic process;GO:0006796//phosphate-containing compound metabolic process;GO:0006793//phosphorus meta…
XP_005892965	0	39	0.001	1.23667	10.2722	0.00273004	0.323628	no	PRICKLE2	TPA: Prickle2 protein-like [Bos taurus]	Environmental Information Processing	Signal transduction	ko04310//Wnt signaling pathway	K04511	-	GO:0046872//metal ion binding;GO:0046914//transition metal ion binding;GO:0043169//cation binding;GO:0005488//binding;GO:0043167//ion binding	-
XM_005908007	0	26.9267	0.001	1.22	10.2527	0.00566963	0.467979	no	ST6GALNAC2	PREDICTED: Bos mutus ST6 (alpha-N-acetyl-neuraminyl-2,3-beta-galactosyl-1,3)-N-acetylgalactosaminide alpha-2,6-sialyltransferase 2 (ST6GALNAC2), transcript variant X2, mRNA	-	-	-	-	-	-	-
XM_014482715	0	49.3267	0.001	1.22	10.2527	0.0121913	0.658992	no	SH3PXD2B	PREDICTED: Bos mutus SH3 and PX domains 2B (SH3PXD2B), mRNA	-	-	-	-	GO:0044464//cell part;GO:0005622//intracellular;GO:0043228//non-membrane-bounded organelle;GO:0005623//cell;GO:0043229//intracellular organelle;GO:0005856//cytoskeleton;GO:0043226//organelle;GO:0015629//actin cytoskeleton;GO:0044424//intracellular part;GO:0043232//intracellular non-membrane-bounded organelle	GO:0005515//protein binding;GO:0005543//phospholipid binding;GO:0005488//binding;GO:0008289//lipid binding;GO:0035091//phosphatidylinositol binding;GO:0019904//protein domain specific binding;GO:1902936//phosphatidylinositol bisphosphate binding;GO:1901981//phosphatidylinositol phosphate binding	GO:0043933//macromolecular complex subunit organization;GO:0008152//metabolic process;GO:0007423//sensory organ development;GO:0048731//system development;GO:0048513//animal organ development;GO:0070727//cellular macromolecule localization;GO:0001501//skeletal system development;GO:0048856//anatomical structure development;GO:0065003//macromolecular complex assembly;GO:0032501//multicellular orga…
XM_005888769	0	21.3333	0.001	1.21667	10.2487	0.0323541	0.943573	no	TFDP2	PREDICTED: Bos mutus transcription factor Dp-2 (E2F dimerization partner 2) (TFDP2), transcript variant X4, mRNA	Cellular Processes	Cell growth and death	ko04110//Cell cycle	K09392	-	-	-
XP_005895819	0	16.9567	0.001	1.21667	10.2487	0.0121172	0.657001	no	HS1BP3	PREDICTED: HCLS1-binding protein 3 [Bos mutus]	-	-	-	-	GO:0043229//intracellular organelle;GO:0044424//intracellular part;GO:0044464//cell part;GO:0043231//intracellular membrane-bounded organelle;GO:0005623//cell;GO:0043226//organelle;GO:0005622//intracellular;GO:0043227//membrane-bounded organelle	GO:0005543//phospholipid binding;GO:0008289//lipid binding;GO:0005488//binding	GO:0008219//cell death;GO:0006915//apoptotic process;GO:0044699//single-organism process;GO:0009987//cellular process;GO:0044763//single-organism cellular process;GO:0012501//programmed cell death
XP_014336745	0	8.99667	0.001	1.21667	10.2487	0.0316555	0.939622	no	HSD17B10	PREDICTED: 3-hydroxyacyl-CoA dehydrogenase type-2 isoform X2 [Bison bison bison]	Metabolism	Amino acid metabolism	ko00280//Valine, leucine and isoleucine degradation	K08683	GO:0005622//intracellular;GO:0043231//intracellular membrane-bounded organelle;GO:0044424//intracellular part;GO:0043229//intracellular organelle;GO:0044464//cell part;GO:0005623//cell;GO:0043226//organelle;GO:0043227//membrane-bounded organelle	GO:0005488//binding;GO:0097159//organic cyclic compound binding;GO:0003676//nucleic acid binding;GO:0003723//RNA binding;GO:0016491//oxidoreductase activity;GO:0016229//steroid dehydrogenase activity;GO:0016616//oxidoreductase activity, acting on the CH-OH group of donors, NAD or NADP as acceptor;GO:0016614//oxidoreductase activity, acting on CH-OH group of donors;GO:0033764//steroid dehydrogenas…	GO:0009987//cellular process;GO:0006399//tRNA metabolic process;GO:0044710//single-organism metabolic process;GO:0006139//nucleobase-containing compound metabolic process;GO:0008152//metabolic process;GO:0044260//cellular macromolecule metabolic process;GO:1901360//organic cyclic compound metabolic process;GO:0034641//cellular nitrogen compound metabolic process;GO:0044238//primary metabolic proc…
XP_005888960	0	28.37	0.001	1.21333	10.2448	0.0236893	0.838264	no	SKI	PREDICTED: ski oncogene, partial [Bos mutus]	-	-	-	-	-	-	-
XP_005906867	0	16.37	0.001	1.21333	10.2448	0.0442536	1	no	SCLY	PREDICTED: selenocysteine lyase [Bos mutus]	Metabolism	Metabolism of other amino acids	ko00450//Selenocompound metabolism	K01763	GO:0044424//intracellular part;GO:0044464//cell part;GO:0005622//intracellular;GO:0005623//cell	GO:0016846//carbon-sulfur lyase activity;GO:0016829//lyase activity;GO:0003824//catalytic activity	-
Unigene045906	0	4.66667	0.001	1.20667	10.2368	0.0277591	0.884561	no	Unigene045906	PREDICTED: atherin-like [Bison bison bison]	-	-	-	-	-	-	-
XP_005897192	0	18.2833	0.001	1.20667	10.2368	0.038438	0.989301	no	SLC37A4	PREDICTED: glucose-6-phosphate translocase [Bos mutus]	Organismal Systems	Digestive system	ko04973//Carbohydrate digestion and absorption	K08171	-	-	-
XP_005893719	0	93.6733	0.001	1.19667	10.2248	0.00436342	0.407561	no	SMCHD1	PREDICTED: structural maintenance of chromosomes flexible hinge domain-containing protein 1 [Bos mutus]	-	-	-	-	GO:0005694//chromosome;GO:0043226//organelle;GO:0043233//organelle lumen;GO:0044428//nuclear part;GO:0031981//nuclear lumen;GO:0044422//organelle part;GO:0043227//membrane-bounded organelle;GO:0043229//intracellular organelle;GO:0044446//intracellular organelle part;GO:0043228//non-membrane-bounded organelle;GO:0005634//nucleus;GO:0005623//cell;GO:0070013//intracellular organelle lumen;GO:0005622…	GO:0005488//binding;GO:0036094//small molecule binding;GO:0032549//ribonucleoside binding;GO:1901363//heterocyclic compound binding;GO:0032550//purine ribonucleoside binding;GO:0097367//carbohydrate derivative binding;GO:0097159//organic cyclic compound binding;GO:0001883//purine nucleoside binding;GO:0001882//nucleoside binding	GO:0007549//dosage compensation;GO:0050789//regulation of biological process;GO:0016043//cellular component organization;GO:0040029//regulation of gene expression, epigenetic;GO:0006996//organelle organization;GO:0071840//cellular component organization or biogenesis;GO:0060255//regulation of macromolecule metabolic process;GO:0065007//biological regulation;GO:0009987//cellular process;GO:0010468…
XM_005910440	0	50.7833	0.001	1.19333	10.2208	6.1e-05	0.0369757	up	ALDH1A2	PREDICTED: Bos mutus aldehyde dehydrogenase 1 family, member A2 (ALDH1A2), transcript variant X2, mRNA	Metabolism	Metabolism of cofactors and vitamins	ko00830//Retinol metabolism	K07249	GO:0044424//intracellular part;GO:0044444//cytoplasmic part;GO:0005737//cytoplasm;GO:0005622//intracellular;GO:0005623//cell;GO:0044464//cell part	GO:0016903//oxidoreductase activity, acting on the aldehyde or oxo group of donors;GO:0016491//oxidoreductase activity;GO:0016620//oxidoreductase activity, acting on the aldehyde or oxo group of donors, NAD or NADP as acceptor;GO:0008289//lipid binding;GO:0003824//catalytic activity;GO:0005501//retinoid binding;GO:0005488//binding;GO:0019840//isoprenoid binding	GO:0048856//anatomical structure development;GO:0046394//carboxylic acid biosynthetic process;GO:0006629//lipid metabolic process;GO:0009887//animal organ morphogenesis;GO:0009605//response to external stimulus;GO:0033993//response to lipid;GO:0065007//biological regulation;GO:0010817//regulation of hormone levels;GO:1901576//organic substance biosynthetic process;GO:0021700//developmental matura…
XP_005887832	0	18.8133	0.001	1.18667	10.2127	0.0359023	0.974513	no	PSMD12	PREDICTED: 26S proteasome non-ATPase regulatory subunit 12 isoform X2 [Bos mutus]	Genetic Information Processing	Folding, sorting and degradation	ko03050//Proteasome	K03035	-	-	-
XP_005892623	0	34.4767	0.001	1.18667	10.2127	0.0187301	0.774777	no	CLCN3	PREDICTED: H(+)/Cl(-) exchange transporter 3 isoform X5 [Bos taurus]	-	-	-	-	-	-	-
XP_005907988	0	20.53	0.001	1.18667	10.2127	0.00918533	0.578127	no	TMEM104	PREDICTED: transmembrane protein 104 [Bos mutus]	-	-	-	-	GO:0016020//membrane;GO:0031224//intrinsic component of membrane;GO:0044425//membrane part	-	-
XP_005887974	0	32.77	0.001	1.18333	10.2086	0.0190641	0.781257	no	TPX2	PREDICTED: targeting protein for Xklp2 isoform X2 [Bos mutus]	-	-	-	-	GO:0030424//axon;GO:0005622//intracellular;GO:0031974//membrane-enclosed lumen;GO:0043226//organelle;GO:0043229//intracellular organelle;GO:0043231//intracellular membrane-bounded organelle;GO:0031981//nuclear lumen;GO:0015630//microtubule cytoskeleton;GO:0044446//intracellular organelle part;GO:0043005//neuron projection;GO:0005623//cell;GO:0043228//non-membrane-bounded organelle;GO:0043232//int…	GO:0005515//protein binding;GO:0019899//enzyme binding;GO:0005488//binding;GO:0019900//kinase binding	GO:0060255//regulation of macromolecule metabolic process;GO:0045859//regulation of protein kinase activity;GO:0042325//regulation of phosphorylation;GO:0010562//positive regulation of phosphorus metabolic process;GO:0007052//mitotic spindle organization;GO:0043085//positive regulation of catalytic activity;GO:0051174//regulation of phosphorus metabolic process;GO:0051338//regulation of transfera…
XM_005909469	0	22.4967	0.001	1.17667	10.2005	0.0282486	0.890097	no	LOC102286920	PREDICTED: Bos mutus betaine--homocysteine S-methyltransferase 1 (LOC102286920), transcript variant X2, mRNA	Metabolism	Amino acid metabolism	ko00260//Glycine, serine and threonine metabolism;ko00270//Cysteine and methionine metabolism	K00544	-	-	-
XP_005910967	0	20.6233	0.001	1.17667	10.2005	0.0334115	0.952384	no	YTHDF1	PREDICTED: YTH domain family protein 1-like isoform X1 [Bos mutus]	-	-	-	-	-	GO:0005488//binding;GO:0003676//nucleic acid binding;GO:0043021//ribonucleoprotein complex binding;GO:0044877//macromolecular complex binding;GO:0097159//organic cyclic compound binding;GO:1901363//heterocyclic compound binding;GO:0003723//RNA binding	GO:0043603//cellular amide metabolic process;GO:1901564//organonitrogen compound metabolic process;GO:0009987//cellular process;GO:0044260//cellular macromolecule metabolic process;GO:0034641//cellular nitrogen compound metabolic process;GO:0006518//peptide metabolic process;GO:0019538//protein metabolic process;GO:0044249//cellular biosynthetic process;GO:0044237//cellular metabolic process;GO:0…
XP_005910968	0	20.6233	0.001	1.17667	10.2005	0.0334149	0.952384	no	YTHDF1	PREDICTED: YTH domain family protein 1-like isoform X1 [Bos mutus]	-	-	-	-	-	GO:0043021//ribonucleoprotein complex binding;GO:1901363//heterocyclic compound binding;GO:0003723//RNA binding;GO:0044877//macromolecular complex binding;GO:0003676//nucleic acid binding;GO:0097159//organic cyclic compound binding;GO:0005488//binding	GO:0009987//cellular process;GO:0071704//organic substance metabolic process;GO:0043603//cellular amide metabolic process;GO:0009058//biosynthetic process;GO:0006413//translational initiation;GO:0034641//cellular nitrogen compound metabolic process;GO:0044237//cellular metabolic process;GO:0044260//cellular macromolecule metabolic process;GO:0043043//peptide biosynthetic process;GO:0009059//macro…
XM_005891932	0	59.8733	0.001	1.17333	10.1964	0.0022685	0.302076	no	EPC1	PREDICTED: Bos mutus enhancer of polycomb homolog 1 (Drosophila) (EPC1), transcript variant X4, mRNA	-	-	-	-	GO:0035267//NuA4 histone acetyltransferase complex;GO:1902493//acetyltransferase complex;GO:1990234//transferase complex;GO:1902494//catalytic complex;GO:0005622//intracellular;GO:0043189//H4/H2A histone acetyltransferase complex;GO:0031967//organelle envelope;GO:0044464//cell part;GO:0043233//organelle lumen;GO:0012505//endomembrane system;GO:0044428//nuclear part;GO:1902562//H4 histone acetyltr…	GO:0008080//N-acetyltransferase activity;GO:0016740//transferase activity;GO:0061733//peptide-lysine-N-acetyltransferase activity;GO:0016410//N-acyltransferase activity;GO:0016407//acetyltransferase activity;GO:0016747//transferase activity, transferring acyl groups other than amino-acyl groups;GO:0003824//catalytic activity;GO:0034212//peptide N-acetyltransferase activity;GO:0016746//transferase…	GO:0010629//negative regulation of gene expression;GO:0043543//protein acylation;GO:0006139//nucleobase-containing compound metabolic process;GO:0048519//negative regulation of biological process;GO:0006325//chromatin organization;GO:0050789//regulation of biological process;GO:0019438//aromatic compound biosynthetic process;GO:0071840//cellular component organization or biogenesis;GO:0016043//ce…
XP_014338251	0	66.7033	0.001	1.17333	10.1964	0.00809432	0.540969	no	CAMSAP2	Calmodulin-regulated spectrin-associated protein 2 [Bos mutus]	-	-	-	-	GO:0005815//microtubule organizing center;GO:0044446//intracellular organelle part;GO:0044422//organelle part;GO:0005623//cell;GO:0015630//microtubule cytoskeleton;GO:0043232//intracellular non-membrane-bounded organelle;GO:0043229//intracellular organelle;GO:0043226//organelle;GO:0005622//intracellular;GO:0044464//cell part;GO:0043228//non-membrane-bounded organelle;GO:0044424//intracellular par…	GO:0008017//microtubule binding;GO:0015631//tubulin binding;GO:0008092//cytoskeletal protein binding;GO:0005488//binding;GO:0005515//protein binding	GO:0016043//cellular component organization;GO:0009987//cellular process;GO:0044699//single-organism process;GO:0030030//cell projection organization;GO:0006996//organelle organization;GO:0071840//cellular component organization or biogenesis;GO:0007017//microtubule-based process;GO:0044763//single-organism cellular process
XM_005911523	0	51.1167	0.001	1.17	10.1923	0.0116211	0.646002	no	UBAP2L	PREDICTED: Bos mutus ubiquitin associated protein 2-like (UBAP2L), transcript variant X6, mRNA	-	-	-	-	GO:0043234//protein complex;GO:0032991//macromolecular complex	GO:0097159//organic cyclic compound binding;GO:1901363//heterocyclic compound binding;GO:0005488//binding;GO:0003723//RNA binding;GO:0003676//nucleic acid binding	GO:0019953//sexual reproduction;GO:0065007//biological regulation;GO:0048872//homeostasis of number of cells;GO:0008037//cell recognition;GO:0044763//single-organism cellular process;GO:0044699//single-organism process;GO:0044703//multi-organism reproductive process;GO:0042592//homeostatic process;GO:0044702//single organism reproductive process;GO:0065008//regulation of biological quality;GO:005…
XM_005887840	0	97.2467	0.001	1.16667	10.1882	0.000625117	0.143682	no	TMEM2	PREDICTED: Bos mutus transmembrane protein 2 (TMEM2), transcript variant X2, mRNA	-	-	-	-	GO:0044421//extracellular region part;GO:0043226//organelle;GO:0005576//extracellular region;GO:0031982//vesicle;GO:0043230//extracellular organelle;GO:0016020//membrane;GO:0043227//membrane-bounded organelle;GO:0044425//membrane part;GO:0031224//intrinsic component of membrane;GO:1903561//extracellular vesicle	-	-
XM_005894343	0	39.46	0.001	1.16667	10.1882	0.00382748	0.379739	no	IWS1	PREDICTED: Bos mutus IWS1 homolog (S. cerevisiae) (IWS1), transcript variant X2, mRNA	-	-	-	-	GO:0044422//organelle part;GO:0044464//cell part;GO:0005623//cell;GO:0031981//nuclear lumen;GO:0043229//intracellular organelle;GO:0005622//intracellular;GO:0043227//membrane-bounded organelle;GO:0005634//nucleus;GO:0044446//intracellular organelle part;GO:0043231//intracellular membrane-bounded organelle;GO:0044424//intracellular part;GO:0031974//membrane-enclosed lumen;GO:0043226//organelle;GO:…	-	GO:1901360//organic cyclic compound metabolic process;GO:0006405//RNA export from nucleus;GO:0031399//regulation of protein modification process;GO:0006396//RNA processing;GO:0006397//mRNA processing;GO:0051128//regulation of cellular component organization;GO:1902275//regulation of chromatin organization;GO:0015931//nucleobase-containing compound transport;GO:0046483//heterocycle metabolic proce…
XP_005903117	0	7.79667	0.001	1.16333	10.184	0.00991182	0.597478	no	FRMD3	PREDICTED: FERM domain-containing protein 3 isoform X3 [Bos mutus]	-	-	-	-	GO:0043228//non-membrane-bounded organelle;GO:0043226//organelle;GO:0044425//membrane part;GO:0005623//cell;GO:0031224//intrinsic component of membrane;GO:0005622//intracellular;GO:0043229//intracellular organelle;GO:0044464//cell part;GO:0016020//membrane;GO:0043232//intracellular non-membrane-bounded organelle;GO:0044424//intracellular part	GO:0005515//protein binding;GO:0005488//binding	-
XM_005906466	0	13.2767	0.001	1.15333	10.1716	0.0164035	0.743664	no	CREM	PREDICTED: Bos mutus cAMP responsive element modulator (CREM), transcript variant X17, mRNA	Organismal Systems	Circulatory system	ko04261//Adrenergic signaling in cardiomyocytes	K09052	GO:0044464//cell part;GO:0032991//macromolecular complex;GO:0043234//protein complex;GO:0043227//membrane-bounded organelle;GO:0043231//intracellular membrane-bounded organelle;GO:0005623//cell;GO:0005622//intracellular;GO:0043229//intracellular organelle;GO:0043226//organelle;GO:0044424//intracellular part	GO:0097159//organic cyclic compound binding;GO:0001071//nucleic acid binding transcription factor activity;GO:0000976//transcription regulatory region sequence-specific DNA binding;GO:0044212//transcription regulatory region DNA binding;GO:0000975//regulatory region DNA binding;GO:0003676//nucleic acid binding;GO:1901363//heterocyclic compound binding;GO:0005515//protein binding;GO:0001067//regul…	GO:0050794//regulation of cellular process;GO:0007154//cell communication;GO:0034641//cellular nitrogen compound metabolic process;GO:0044260//cellular macromolecule metabolic process;GO:0046683//response to organophosphorus;GO:0046483//heterocycle metabolic process;GO:0006725//cellular aromatic compound metabolic process;GO:0044710//single-organism metabolic process;GO:0006807//nitrogen compound…
XP_005905517	0	40.12	0.001	1.15333	10.1716	0.00374632	0.377798	no	RAPGEF3	PREDICTED: rap guanine nucleotide exchange factor 3 isoform X2 [Bos mutus]	Environmental Information Processing;Organismal Systems	Circulatory system;Signal transduction;Nervous system;Immune system	ko04024//cAMP signaling pathway;ko04015//Rap1 signaling pathway;ko04261//Adrenergic signaling in cardiomyocytes;ko04670//Leukocyte transendothelial migration;ko04726//Serotonergic synapse;ko04720//Long-term potentiation	K08014	GO:0005623//cell;GO:0015629//actin cytoskeleton;GO:0005576//extracellular region;GO:1903561//extracellular vesicle;GO:0005856//cytoskeleton;GO:0044424//intracellular part;GO:0043232//intracellular non-membrane-bounded organelle;GO:0043228//non-membrane-bounded organelle;GO:0043230//extracellular organelle;GO:0016020//membrane;GO:0043226//organelle;GO:0043227//membrane-bounded organelle;GO:0031982…	GO:0005488//binding;GO:0005515//protein binding;GO:0098772//molecular function regulator;GO:0005085//guanyl-nucleotide exchange factor activity;GO:0005088//Ras guanyl-nucleotide exchange factor activity	GO:0031323//regulation of cellular metabolic process;GO:0051130//positive regulation of cellular component organization;GO:0042325//regulation of phosphorylation;GO:0072359//circulatory system development;GO:0006886//intracellular protein transport;GO:0001885//endothelial cell development;GO:0045446//endothelial cell differentiation;GO:0002064//epithelial cell development;GO:0014074//response to …
XM_005894300	0	30.1233	0.001	1.14333	10.159	0.022264	0.823069	no	TERF2IP	PREDICTED: Bos mutus telomeric repeat binding factor 2, interacting protein (TERF2IP), transcript variant X2, mRNA	-	-	-	-	GO:0032991//macromolecular complex;GO:0043227//membrane-bounded organelle;GO:0044422//organelle part;GO:0043226//organelle;GO:0000781//chromosome, telomeric region;GO:0044446//intracellular organelle part;GO:0043228//non-membrane-bounded organelle;GO:0044464//cell part;GO:0044427//chromosomal part;GO:0043229//intracellular organelle;GO:0043234//protein complex;GO:0000784//nuclear chromosome, telo…	GO:0097159//organic cyclic compound binding;GO:0005488//binding;GO:0003676//nucleic acid binding;GO:0043565//sequence-specific DNA binding;GO:0003677//DNA binding;GO:1901363//heterocyclic compound binding	GO:0044238//primary metabolic process;GO:0051641//cellular localization;GO:0031399//regulation of protein modification process;GO:0009892//negative regulation of metabolic process;GO:0051247//positive regulation of protein metabolic process;GO:0000018//regulation of DNA recombination;GO:0065009//regulation of molecular function;GO:0010605//negative regulation of macromolecule metabolic process;GO…
XM_014482010	0	37.18	0.001	1.14333	10.159	0.00331064	0.354285	no	HELLS	PREDICTED: Bos mutus helicase, lymphoid-specific (HELLS), transcript variant X6, mRNA	-	-	-	-	GO:0098687//chromosomal region;GO:0043231//intracellular membrane-bounded organelle;GO:0043228//non-membrane-bounded organelle;GO:0044427//chromosomal part;GO:0005622//intracellular;GO:0043229//intracellular organelle;GO:0044422//organelle part;GO:0000775//chromosome, centromeric region;GO:0044464//cell part;GO:0005694//chromosome;GO:0043226//organelle;GO:0043227//membrane-bounded organelle;GO:00…	GO:0032549//ribonucleoside binding;GO:0036094//small molecule binding;GO:0005488//binding;GO:0044877//macromolecular complex binding;GO:1901363//heterocyclic compound binding;GO:0001882//nucleoside binding;GO:0097367//carbohydrate derivative binding;GO:0097159//organic cyclic compound binding;GO:0032550//purine ribonucleoside binding;GO:0001883//purine nucleoside binding	GO:0071704//organic substance metabolic process;GO:0044238//primary metabolic process;GO:0010629//negative regulation of gene expression;GO:0006342//chromatin silencing;GO:0050789//regulation of biological process;GO:0043933//macromolecular complex subunit organization;GO:0051172//negative regulation of nitrogen compound metabolic process;GO:0008283//cell proliferation;GO:0050896//response to sti…
XP_005888692	0	49.92	0.001	1.14	10.1548	0.0119795	0.655458	no	FAM83H	PREDICTED: protein FAM83H [Bos mutus]	-	-	-	-	GO:0005622//intracellular;GO:0005856//cytoskeleton;GO:0043229//intracellular organelle;GO:0044446//intracellular organelle part;GO:0044424//intracellular part;GO:0043232//intracellular non-membrane-bounded organelle;GO:0044422//organelle part;GO:0005623//cell;GO:0043226//organelle;GO:0044464//cell part;GO:0044430//cytoskeletal part;GO:0099513//polymeric cytoskeletal fiber;GO:0043228//non-membrane…	GO:0032403//protein complex binding;GO:0005488//binding;GO:0005515//protein binding;GO:0019215//intermediate filament binding;GO:0044877//macromolecular complex binding	GO:0034613//cellular protein localization;GO:0006928//movement of cell or subcellular component;GO:0048870//cell motility;GO:0044699//single-organism process;GO:0009987//cellular process;GO:0007010//cytoskeleton organization;GO:0033365//protein localization to organelle;GO:0071840//cellular component organization or biogenesis;GO:0051179//localization;GO:0051641//cellular localization;GO:0016477/…
XM_005901179	0.00333333	33.0733	0.001	1.13667	10.1506	0.00364487	0.373638	no	ZFYVE27	PREDICTED: Bos mutus zinc finger, FYVE domain containing 27 (ZFYVE27), transcript variant X4, mRNA	Cellular Processes	Transport and catabolism	ko04144//Endocytosis	K19368	GO:0043229//intracellular organelle;GO:0044425//membrane part;GO:0005774//vacuolar membrane;GO:0005623//cell;GO:0043226//organelle;GO:0005768//endosome;GO:0044440//endosomal part;GO:0044422//organelle part;GO:0042175//nuclear outer membrane-endoplasmic reticulum membrane network;GO:0044444//cytoplasmic part;GO:0097458//neuron part;GO:0005783//endoplasmic reticulum;GO:0044464//cell part;GO:0012505…	GO:0043167//ion binding;GO:0005488//binding;GO:0043169//cation binding	GO:0065007//biological regulation;GO:0050789//regulation of biological process;GO:0016043//cellular component organization;GO:0009987//cellular process;GO:0044802//single-organism membrane organization;GO:0007165//signal transduction;GO:0050794//regulation of cellular process;GO:0007154//cell communication;GO:0050896//response to stimulus;GO:0044763//single-organism cellular process;GO:0061024//m…
XP_005904323	0	25.4533	0.001	1.13333	10.1464	0.00228083	0.302955	no	CARF	PREDICTED: calcium-responsive transcription factor isoform X3 [Bos mutus]	-	-	-	-	GO:0044428//nuclear part;GO:0044422//organelle part;GO:0043227//membrane-bounded organelle;GO:0031974//membrane-enclosed lumen;GO:0005622//intracellular;GO:0044424//intracellular part;GO:0044446//intracellular organelle part;GO:0005634//nucleus;GO:0043231//intracellular membrane-bounded organelle;GO:0043233//organelle lumen;GO:0043226//organelle;GO:0070013//intracellular organelle lumen;GO:004322…	GO:1901363//heterocyclic compound binding;GO:0000981//RNA polymerase II transcription factor activity, sequence-specific DNA binding;GO:0000982//transcription factor activity, RNA polymerase II core promoter proximal region sequence-specific binding;GO:0001071//nucleic acid binding transcription factor activity;GO:0003700//transcription factor activity, sequence-specific DNA binding;GO:0005488//b…	GO:0051592//response to calcium ion;GO:0090304//nucleic acid metabolic process;GO:0042221//response to chemical;GO:0070887//cellular response to chemical stimulus;GO:1901360//organic cyclic compound metabolic process;GO:0051716//cellular response to stimulus;GO:0044238//primary metabolic process;GO:0016070//RNA metabolic process;GO:1901576//organic substance biosynthetic process;GO:0006351//trans…
XP_014337589	0	23.9067	0.001	1.13	10.1421	0.0272376	0.87907	no	CFAP52	TPA: Suppressor of Mec and Unc defects family member (smu-1)-like isoform 2 [Bos taurus]	-	-	-	-	-	-	-
XP_005889821	0	6.7	0.001	1.12333	10.1336	0.0174522	0.756238	no	TMED3	PREDICTED: transmembrane emp24 domain-containing protein 3 [Bos mutus]	-	-	-	-	GO:0016020//membrane;GO:0044424//intracellular part;GO:0044425//membrane part;GO:0044464//cell part;GO:0043226//organelle;GO:0005623//cell;GO:0043231//intracellular membrane-bounded organelle;GO:0031224//intrinsic component of membrane;GO:0012505//endomembrane system;GO:0043229//intracellular organelle;GO:0043227//membrane-bounded organelle;GO:0005622//intracellular;GO:0042175//nuclear outer memb…	-	GO:0051179//localization;GO:0051234//establishment of localization
XP_005898231	0	13.0733	0.001	1.11333	10.1207	0.00301999	0.338245	no	CXADR	PREDICTED: coxsackievirus and adenovirus receptor homolog isoform X2 [Bos mutus]	-	-	-	-	GO:0042995//cell projection;GO:0043227//membrane-bounded organelle;GO:0044425//membrane part;GO:0043226//organelle;GO:0031224//intrinsic component of membrane;GO:0098858//actin-based cell projection;GO:0005622//intracellular;GO:0005911//cell-cell junction;GO:0070161//anchoring junction;GO:0043229//intracellular organelle;GO:0071944//cell periphery;GO:0097458//neuron part;GO:0043005//neuron projec…	GO:0005515//protein binding;GO:0005488//binding;GO:0019904//protein domain specific binding	GO:0022414//reproductive process;GO:0030595//leukocyte chemotaxis;GO:0001775//cell activation;GO:0008016//regulation of heart contraction;GO:0009605//response to external stimulus;GO:0065008//regulation of biological quality;GO:0042330//taxis;GO:0034330//cell junction organization;GO:0050789//regulation of biological process;GO:0009888//tissue development;GO:0060326//cell chemotaxis;GO:0007275//m…
XP_005911450	0	24.28	0.001	1.11	10.1163	0.00592249	0.473665	no	CPT2	PREDICTED: carnitine O-palmitoyltransferase 2, mitochondrial isoform X2 [Bos mutus]	Metabolism;Organismal Systems	Global and Overview;Lipid metabolism;Endocrine system	ko03320//PPAR signaling pathway;ko01212//Fatty acid metabolism;ko00071//Fatty acid degradation	K08766	GO:0005634//nucleus;GO:0005622//intracellular;GO:0044428//nuclear part;GO:0043231//intracellular membrane-bounded organelle;GO:0044422//organelle part;GO:0031975//envelope;GO:0043227//membrane-bounded organelle;GO:0044424//intracellular part;GO:0016020//membrane;GO:0044446//intracellular organelle part;GO:0019866//organelle inner membrane;GO:0031974//membrane-enclosed lumen;GO:0043233//organelle …	GO:0016746//transferase activity, transferring acyl groups;GO:0003824//catalytic activity;GO:0008374//O-acyltransferase activity;GO:0016740//transferase activity;GO:0016406//carnitine O-acyltransferase activity;GO:0016747//transferase activity, transferring acyl groups other than amino-acyl groups	GO:0051179//localization;GO:0044710//single-organism metabolic process;GO:0051234//establishment of localization;GO:0006082//organic acid metabolic process;GO:0008152//metabolic process;GO:0044237//cellular metabolic process;GO:0044281//small molecule metabolic process;GO:0032787//monocarboxylic acid metabolic process;GO:0044699//single-organism process;GO:0043436//oxoacid metabolic process;GO:00…
XP_005892216	0	16.84	0.001	1.10667	10.112	0.0379784	0.983415	no	GALK2	PREDICTED: N-acetylgalactosamine kinase isoform X2 [Bos mutus]	-	-	-	-	GO:0044424//intracellular part;GO:0005622//intracellular;GO:0044464//cell part;GO:0005623//cell	GO:0001882//nucleoside binding;GO:0003824//catalytic activity;GO:0016772//transferase activity, transferring phosphorus-containing groups;GO:1901363//heterocyclic compound binding;GO:0036094//small molecule binding;GO:0005488//binding;GO:0016773//phosphotransferase activity, alcohol group as acceptor;GO:0001883//purine nucleoside binding;GO:0016740//transferase activity;GO:0032549//ribonucleoside…	GO:0044237//cellular metabolic process;GO:0006796//phosphate-containing compound metabolic process;GO:0044281//small molecule metabolic process;GO:0005996//monosaccharide metabolic process;GO:0006793//phosphorus metabolic process;GO:0044723//single-organism carbohydrate metabolic process;GO:0008152//metabolic process;GO:0009987//cellular process;GO:0071704//organic substance metabolic process;GO:…
XP_005899954	0	27.4167	0.001	1.10667	10.112	0.00477368	0.426285	no	KATNB1	PREDICTED: katanin p80 WD40 repeat-containing subunit B1 [Bos mutus]	-	-	-	-	GO:0044464//cell part;GO:0097458//neuron part;GO:0005622//intracellular;GO:0005623//cell;GO:0043226//organelle;GO:0015630//microtubule cytoskeleton;GO:0043229//intracellular organelle;GO:0044430//cytoskeletal part;GO:0044424//intracellular part;GO:0032991//macromolecular complex;GO:0043232//intracellular non-membrane-bounded organelle;GO:0043228//non-membrane-bounded organelle;GO:0005815//microtu…	GO:0046983//protein dimerization activity;GO:0017111//nucleoside-triphosphatase activity;GO:0015631//tubulin binding;GO:0008092//cytoskeletal protein binding;GO:0005488//binding;GO:0016818//hydrolase activity, acting on acid anhydrides, in phosphorus-containing anhydrides;GO:0016787//hydrolase activity;GO:0042623//ATPase activity, coupled;GO:0016462//pyrophosphatase activity;GO:0003824//catalytic…	GO:0007059//chromosome segregation;GO:0098813//nuclear chromosome segregation;GO:0051276//chromosome organization;GO:1903047//mitotic cell cycle process;GO:0032984//macromolecular complex disassembly;GO:0007049//cell cycle;GO:0007067//mitotic nuclear division;GO:0071840//cellular component organization or biogenesis;GO:0044699//single-organism process;GO:0007010//cytoskeleton organization;GO:0043…
XP_014334947	0	27.4167	0.001	1.10667	10.112	0.00476889	0.426285	no	KATNB1	PREDICTED: katanin p80 WD40 repeat-containing subunit B1 [Bos mutus]	-	-	-	-	GO:0044424//intracellular part;GO:0044430//cytoskeletal part;GO:0005623//cell;GO:0005856//cytoskeleton;GO:0005622//intracellular;GO:0043226//organelle;GO:0044446//intracellular organelle part;GO:0043234//protein complex;GO:0097458//neuron part;GO:0042995//cell projection;GO:0044464//cell part;GO:0043227//membrane-bounded organelle;GO:0043228//non-membrane-bounded organelle;GO:0043231//intracellul…	GO:0003824//catalytic activity;GO:0005515//protein binding;GO:0008092//cytoskeletal protein binding;GO:0016787//hydrolase activity;GO:0046983//protein dimerization activity;GO:0016887//ATPase activity;GO:0017111//nucleoside-triphosphatase activity;GO:0016817//hydrolase activity, acting on acid anhydrides;GO:0005488//binding;GO:0015631//tubulin binding;GO:0016818//hydrolase activity, acting on aci…	GO:0043933//macromolecular complex subunit organization;GO:0071822//protein complex subunit organization;GO:0051261//protein depolymerization;GO:0022402//cell cycle process;GO:0000280//nuclear division;GO:0044763//single-organism cellular process;GO:0000226//microtubule cytoskeleton organization;GO:0007067//mitotic nuclear division;GO:0031109//microtubule polymerization or depolymerization;GO:004…
XP_014334831	0	6.97667	0.001	1.10333	10.1077	0.0233534	0.833611	no	PDGFB	Platelet-derived growth factor subunit B, partial [Bos mutus]	Cellular Processes;Environmental Information Processing	Cell motility;Cellular commiunity;Signal transduction;Signaling molecules and interaction	ko04151//PI3K-Akt signaling pathway;ko04010//MAPK signaling pathway;ko04014//Ras signaling pathway;ko04510//Focal adhesion;ko04060//Cytokine-cytokine receptor interaction;ko04810//Regulation of actin cytoskeleton;ko04015//Rap1 signaling pathway;ko04540//Gap junction	K17386	-	-	-
XM_005892906	0	18.6667	0.001	1.1	10.1033	0.00936755	0.583981	no	FEZF2	PREDICTED: Bos mutus FEZ family zinc finger 2 (FEZF2), mRNA	-	-	-	-	-	-	-
XP_005893843	0	56.9367	0.001	1.1	10.1033	0.00945426	0.585245	no	SKIV2L	PREDICTED: helicase SKI2W [Bos mutus]	Genetic Information Processing	Folding, sorting and degradation	ko03018//RNA degradation	K12599	GO:0044446//intracellular organelle part;GO:0005634//nucleus;GO:0043227//membrane-bounded organelle;GO:0043234//protein complex;GO:0044424//intracellular part;GO:0043231//intracellular membrane-bounded organelle;GO:0005623//cell;GO:0043233//organelle lumen;GO:0031974//membrane-enclosed lumen;GO:0032991//macromolecular complex;GO:0005622//intracellular;GO:0031981//nuclear lumen;GO:0043226//organel…	GO:0016818//hydrolase activity, acting on acid anhydrides, in phosphorus-containing anhydrides;GO:0001882//nucleoside binding;GO:1901363//heterocyclic compound binding;GO:0003676//nucleic acid binding;GO:0016817//hydrolase activity, acting on acid anhydrides;GO:0016787//hydrolase activity;GO:0004386//helicase activity;GO:0016462//pyrophosphatase activity;GO:0032549//ribonucleoside binding;GO:0017…	GO:0044238//primary metabolic process;GO:1901360//organic cyclic compound metabolic process;GO:0044237//cellular metabolic process;GO:0071704//organic substance metabolic process;GO:0008152//metabolic process;GO:0006807//nitrogen compound metabolic process;GO:0043170//macromolecule metabolic process;GO:0046483//heterocycle metabolic process;GO:0090304//nucleic acid metabolic process;GO:0034641//c…
XP_005888410	0	50.7767	0.001	1.09667	10.0989	0.00218923	0.296753	no	AP3D1	AP-3 complex subunit delta-1 [Bos taurus]	Cellular Processes	Transport and catabolism	ko04142//Lysosome	K12396	GO:0044444//cytoplasmic part;GO:0005634//nucleus;GO:0043227//membrane-bounded organelle;GO:0044422//organelle part;GO:0070013//intracellular organelle lumen;GO:0098796//membrane protein complex;GO:0044424//intracellular part;GO:0044464//cell part;GO:0043229//intracellular organelle;GO:0098588//bounding membrane of organelle;GO:0005773//vacuole;GO:0044437//vacuolar part;GO:0098805//whole membrane;…	-	GO:0008089//anterograde axonal transport;GO:0055076//transition metal ion homeostasis;GO:0046649//lymphocyte activation;GO:0030217//T cell differentiation;GO:0055082//cellular chemical homeostasis;GO:0010256//endomembrane system organization;GO:0098771//inorganic ion homeostasis;GO:0042592//homeostatic process;GO:0007018//microtubule-based movement;GO:0048869//cellular developmental process;GO:00…
XP_005906094	0	26.4067	0.001	1.09	10.0901	0.023667	0.838264	no	DLG4	PREDICTED: disks large homolog 4 isoform X18 [Ovis aries musimon]	Environmental Information Processing;Organismal Systems	Nervous system;Signal transduction	ko04390//Hippo signaling pathway;ko04724//Glutamatergic synapse	K11828	-	-	-
XP_005891151	0	28.8567	0.001	1.07	10.0634	0.000321996	0.0955778	no	CCDC13	PREDICTED: coiled-coil domain-containing protein 13 [Bison bison bison]	-	-	-	-	GO:0015630//microtubule cytoskeleton;GO:0044446//intracellular organelle part;GO:0005623//cell;GO:0005815//microtubule organizing center;GO:0044424//intracellular part;GO:0044422//organelle part;GO:0043232//intracellular non-membrane-bounded organelle;GO:0005813//centrosome;GO:0005622//intracellular;GO:0043229//intracellular organelle;GO:0044430//cytoskeletal part;GO:0043228//non-membrane-bounded…	-	GO:0032502//developmental process;GO:0033554//cellular response to stress;GO:1902589//single-organism organelle organization;GO:0016043//cellular component organization;GO:0032989//cellular component morphogenesis;GO:0048869//cellular developmental process;GO:0048856//anatomical structure development;GO:0030031//cell projection assembly;GO:0006996//organelle organization;GO:0042384//cilium assemb…
XM_005891457	0	7.54	0.001	1.06667	10.0589	0.0193405	0.785765	no	LOC102284210	PREDICTED: Bos mutus chromosome unknown open reading frame, human C3orf18 (LOC102284210), transcript variant X2, mRNA	-	-	-	-	-	-	-
XM_014482775	0	23.5733	0.001	1.06667	10.0589	0.00854989	0.558478	no	PKP1	PREDICTED: Bos mutus plakophilin 1 (PKP1), transcript variant X2, mRNA	-	-	-	-	GO:0044424//intracellular part;GO:0031974//membrane-enclosed lumen;GO:0005576//extracellular region;GO:0031982//vesicle;GO:0043232//intracellular non-membrane-bounded organelle;GO:0005623//cell;GO:0030054//cell junction;GO:0031981//nuclear lumen;GO:0005856//cytoskeleton;GO:0044421//extracellular region part;GO:0043230//extracellular organelle;GO:0044428//nuclear part;GO:0070013//intracellular org…	GO:0005198//structural molecule activity;GO:0005488//binding;GO:0032403//protein complex binding;GO:0044877//macromolecular complex binding;GO:0005515//protein binding	GO:0044707//single-multicellular organism process;GO:0022607//cellular component assembly;GO:0007154//cell communication;GO:0009987//cellular process;GO:0032501//multicellular organismal process;GO:0098602//single organism cell adhesion;GO:0022610//biological adhesion;GO:0044763//single-organism cellular process;GO:0016043//cellular component organization;GO:0044699//single-organism process;GO:00…
XP_005905862	0	31.8067	0.001	1.06667	10.0589	0.020826	0.803435	no	SEMA7A	PREDICTED: semaphorin-7A [Bos mutus]	Organismal Systems	Development	ko04360//Axon guidance	K06529	-	-	-
XM_005909235	0	79.38	0.001	1.06	10.0498	1.14e-05	0.0130946	up	ABCC4	PREDICTED: Bos mutus ATP-binding cassette, sub-family C (CFTR/MRP), member 4 (ABCC4), transcript variant X2, mRNA	Organismal Systems;Environmental Information Processing	Digestive system;Membrane transport;Signal transduction	ko04024//cAMP signaling pathway;ko04976//Bile secretion;ko02010//ABC transporters	K05673	GO:0016020//membrane;GO:0031224//intrinsic component of membrane;GO:0044425//membrane part	GO:0022857//transmembrane transporter activity;GO:0016818//hydrolase activity, acting on acid anhydrides, in phosphorus-containing anhydrides;GO:0003824//catalytic activity;GO:0036094//small molecule binding;GO:0005215//transporter activity;GO:0097367//carbohydrate derivative binding;GO:0032550//purine ribonucleoside binding;GO:0032549//ribonucleoside binding;GO:0016462//pyrophosphatase activity;…	GO:0044763//single-organism cellular process;GO:0051234//establishment of localization;GO:0044699//single-organism process;GO:0051179//localization;GO:0009987//cellular process
XM_005898381	0.0166667	18.3333	0.001	1.05667	10.0453	0.0366359	0.974513	no	REN	PREDICTED: Bos mutus renin (REN), transcript variant X2, mRNA	Organismal Systems	Endocrine system	ko04924//Renin secretion;ko04614//Renin-angiotensin system	K01380	GO:0044421//extracellular region part;GO:0005623//cell;GO:0044464//cell part;GO:0005576//extracellular region;GO:0005622//intracellular	GO:0004175//endopeptidase activity;GO:0008233//peptidase activity;GO:0003824//catalytic activity;GO:0070011//peptidase activity, acting on L-amino acid peptides;GO:0016787//hydrolase activity;GO:0005488//binding;GO:0005515//protein binding	GO:0044707//single-multicellular organism process;GO:0008217//regulation of blood pressure;GO:0044699//single-organism process;GO:0008015//blood circulation;GO:0003006//developmental process involved in reproduction;GO:0043412//macromolecule modification;GO:0044237//cellular metabolic process;GO:0006464//cellular protein modification process;GO:0007610//behavior;GO:0016310//phosphorylation;GO:001…
XM_005908750	0	22.19	0.001	1.05667	10.0453	0.00703285	0.502932	no	PUS3	PREDICTED: Bos mutus pseudouridylate synthase 3 (PUS3), transcript variant X2, mRNA	-	-	-	-	GO:0044464//cell part;GO:0044424//intracellular part;GO:0043227//membrane-bounded organelle;GO:0005623//cell;GO:0043229//intracellular organelle;GO:0043231//intracellular membrane-bounded organelle;GO:0005622//intracellular;GO:0043226//organelle	GO:1901363//heterocyclic compound binding;GO:0097159//organic cyclic compound binding;GO:0016853//isomerase activity;GO:0003824//catalytic activity;GO:0003676//nucleic acid binding;GO:0005488//binding;GO:0016866//intramolecular transferase activity	GO:0008152//metabolic process;GO:0009451//RNA modification;GO:1901360//organic cyclic compound metabolic process;GO:0006725//cellular aromatic compound metabolic process;GO:0016070//RNA metabolic process;GO:0044260//cellular macromolecule metabolic process;GO:0034660//ncRNA metabolic process;GO:0034641//cellular nitrogen compound metabolic process;GO:0046483//heterocycle metabolic process;GO:0006…
XM_014477434	0	37.1433	0.001	1.05667	10.0453	0.0173092	0.7536	no	DLGAP3	PREDICTED: Bos mutus discs, large (Drosophila) homolog-associated protein 3 (DLGAP3), mRNA	-	-	-	-	GO:0097458//neuron part;GO:0045202//synapse;GO:0044456//synapse part;GO:0098590//plasma membrane region;GO:0043005//neuron projection;GO:0030425//dendrite;GO:0071944//cell periphery;GO:0060076//excitatory synapse;GO:0005886//plasma membrane;GO:0005623//cell;GO:0044459//plasma membrane part;GO:0044425//membrane part;GO:0042995//cell projection;GO:0016020//membrane;GO:0036477//somatodendritic compa…	GO:0005515//protein binding;GO:0005488//binding	-
XP_005892810	0	29.34	0.001	1.05667	10.0453	0.0228348	0.833386	no	MIER2	PREDICTED: mesoderm induction early response protein 2 [Bos mutus]	-	-	-	-	GO:0043231//intracellular membrane-bounded organelle;GO:0044464//cell part;GO:0043227//membrane-bounded organelle;GO:0005622//intracellular;GO:0043229//intracellular organelle;GO:0044424//intracellular part;GO:0005623//cell;GO:0043226//organelle	-	GO:0010467//gene expression;GO:0006807//nitrogen compound metabolic process;GO:0044271//cellular nitrogen compound biosynthetic process;GO:0008152//metabolic process;GO:0044260//cellular macromolecule metabolic process;GO:0006725//cellular aromatic compound metabolic process;GO:0032774//RNA biosynthetic process;GO:0034654//nucleobase-containing compound biosynthetic process;GO:0016070//RNA metabo…
Unigene021677	0	11.3333	0.001	1.05333	10.0407	0.0106664	0.623504	no	Unigene021677	PREDICTED: collagen alpha-1(I) chain-like [Sus scrofa]	-	-	-	-	-	-	GO:0050896//response to stimulus;GO:0009987//cellular process;GO:0044699//single-organism process
XP_005911211	0	11.2633	0.001	1.05333	10.0407	0.0199366	0.796198	no	GRHPR	PREDICTED: glyoxylate reductase/hydroxypyruvate reductase [Bos mutus]	Metabolism	Carbohydrate metabolism;Amino acid metabolism	ko00620//Pyruvate metabolism;ko00260//Glycine, serine and threonine metabolism;ko00630//Glyoxylate and dicarboxylate metabolism	K00049	GO:0031982//vesicle;GO:0043230//extracellular organelle;GO:1903561//extracellular vesicle;GO:0044464//cell part;GO:0005576//extracellular region;GO:0044424//intracellular part;GO:0043226//organelle;GO:0043227//membrane-bounded organelle;GO:0005623//cell;GO:0005622//intracellular;GO:0044421//extracellular region part	GO:0043167//ion binding;GO:0005515//protein binding;GO:0016614//oxidoreductase activity, acting on CH-OH group of donors;GO:0016616//oxidoreductase activity, acting on the CH-OH group of donors, NAD or NADP as acceptor;GO:0043168//anion binding;GO:0005488//binding;GO:1901363//heterocyclic compound binding;GO:0003824//catalytic activity;GO:0000166//nucleotide binding;GO:1901265//nucleoside phospha…	GO:0044710//single-organism metabolic process;GO:0008152//metabolic process;GO:0071822//protein complex subunit organization;GO:0006461//protein complex assembly;GO:0022607//cellular component assembly;GO:0032501//multicellular organismal process;GO:0044085//cellular component biogenesis;GO:0043933//macromolecular complex subunit organization;GO:0070271//protein complex biogenesis;GO:0003008//sys…
XP_014337312	0	18.77	0.001	1.05333	10.0407	0.0344179	0.961274	no	LOC102270628	PREDICTED: zinc finger protein 471-like [Bos mutus]	-	-	-	-	-	-	-
XP_014336112	0	25.2267	0.001	1.04667	10.0316	0.0266945	0.874354	no	DGCR2	PREDICTED: integral membrane protein DGCR2/IDD [Bos mutus]	-	-	-	-	GO:0031224//intrinsic component of membrane;GO:0016020//membrane;GO:0044425//membrane part	-	GO:0050877//neurological system process;GO:0032501//multicellular organismal process;GO:0003008//system process
XP_005907590	0	13.7733	0.001	1.03333	10.0131	0.0160393	0.736038	no	ZNF385B	PREDICTED: zinc finger protein 385B isoform X2 [Bos taurus]	-	-	-	-	-	-	-
XP_005902340	0	30.6833	0.001	1.02667	10.0038	0.0196643	0.789811	no	CTAGE5	PREDICTED: cTAGE family member 5 isoform X2 [Bos mutus]	-	-	-	-	-	-	-
XP_005907834	0	41.53	0.001	1.02	9.99435	0.0150252	0.713025	no	KIAA0355	KIAA0355 [Macaca mulatta]	-	-	-	-	-	-	-
XM_005905010	0	16.2533	0.001	1.00333	9.97059	0.0167148	0.744971	no	FUZ	PREDICTED: Bos mutus fuzzy planar cell polarity protein (FUZ), transcript variant X2, mRNA	-	-	-	-	GO:0044421//extracellular region part;GO:0043230//extracellular organelle;GO:1903561//extracellular vesicle;GO:0005576//extracellular region;GO:0031982//vesicle;GO:0043226//organelle;GO:0043227//membrane-bounded organelle	-	GO:0051179//localization;GO:0032990//cell part morphogenesis;GO:0006996//organelle organization;GO:0009653//anatomical structure morphogenesis;GO:0048646//anatomical structure formation involved in morphogenesis;GO:0071840//cellular component organization or biogenesis;GO:0044767//single-organism developmental process;GO:0070925//organelle assembly;GO:0022607//cellular component assembly;GO:00009…
XM_014479411	0.0433333	208	0.001	1.00333	9.97059	2.91e-09	3.85e-05	up	FAT4	PREDICTED: Bos mutus FAT atypical cadherin 4 (FAT4), mRNA	-	-	-	-	GO:0005576//extracellular region;GO:0044421//extracellular region part;GO:0005623//cell;GO:0044464//cell part;GO:0044425//membrane part;GO:0031224//intrinsic component of membrane;GO:0031982//vesicle;GO:0016020//membrane;GO:1903561//extracellular vesicle;GO:0043230//extracellular organelle;GO:0043226//organelle;GO:0043227//membrane-bounded organelle	GO:0043167//ion binding;GO:0046872//metal ion binding;GO:0043169//cation binding;GO:0005488//binding	GO:0022610//biological adhesion;GO:0030900//forebrain development;GO:0001503//ossification;GO:0050794//regulation of cellular process;GO:0044707//single-multicellular organism process;GO:0021543//pallium development;GO:0098609//cell-cell adhesion;GO:0051239//regulation of multicellular organismal process;GO:0023052//signaling;GO:0050793//regulation of developmental process;GO:0007154//cell commun…
XP_005900493	0	40.6867	0.001	1	9.96578	0.014079	0.694298	no	NCOA6	PREDICTED: nuclear receptor coactivator 6 isoform X2 [Bos mutus]	-	-	-	-	GO:0044464//cell part;GO:0034708//methyltransferase complex;GO:0044446//intracellular organelle part;GO:0005634//nucleus;GO:0031981//nuclear lumen;GO:0070013//intracellular organelle lumen;GO:0043229//intracellular organelle;GO:0043231//intracellular membrane-bounded organelle;GO:0032991//macromolecular complex;GO:0044424//intracellular part;GO:0043227//membrane-bounded organelle;GO:0005622//intr…	GO:0005515//protein binding;GO:0003712//transcription cofactor activity;GO:0008134//transcription factor binding;GO:0000989//transcription factor activity, transcription factor binding;GO:0005488//binding;GO:0003713//transcription coactivator activity;GO:0000988//transcription factor activity, protein binding	GO:0050896//response to stimulus;GO:0030097//hemopoiesis;GO:0048513//animal organ development;GO:0051716//cellular response to stimulus;GO:0018130//heterocycle biosynthetic process;GO:1901362//organic cyclic compound biosynthetic process;GO:0019438//aromatic compound biosynthetic process;GO:0016070//RNA metabolic process;GO:0043170//macromolecule metabolic process;GO:0032502//developmental proces…
XP_005895745	0.0233333	26.1233	0.001	0.993333	9.95613	0.0261752	0.867223	no	DNMT3A	PREDICTED: DNA (cytosine-5)-methyltransferase 3A isoform X1 [Bos mutus]	Metabolism	Amino acid metabolism	ko00270//Cysteine and methionine metabolism	K17398	GO:0043229//intracellular organelle;GO:0031974//membrane-enclosed lumen;GO:0031981//nuclear lumen;GO:0005623//cell;GO:0044424//intracellular part;GO:0005694//chromosome;GO:0043233//organelle lumen;GO:0005622//intracellular;GO:0044422//organelle part;GO:0043227//membrane-bounded organelle;GO:0043226//organelle;GO:0005634//nucleus;GO:0070013//intracellular organelle lumen;GO:0000785//chromatin;GO:0…	GO:0008757//S-adenosylmethionine-dependent methyltransferase activity;GO:0003824//catalytic activity;GO:0005515//protein binding;GO:0097159//organic cyclic compound binding;GO:0005488//binding;GO:0016741//transferase activity, transferring one-carbon groups;GO:0016740//transferase activity;GO:0003676//nucleic acid binding;GO:0008168//methyltransferase activity;GO:1901363//heterocyclic compound bi…	GO:0043414//macromolecule methylation;GO:0010556//regulation of macromolecule biosynthetic process;GO:0044260//cellular macromolecule metabolic process;GO:0019222//regulation of metabolic process;GO:0051704//multi-organism process;GO:0044703//multi-organism reproductive process;GO:0006725//cellular aromatic compound metabolic process;GO:0032501//multicellular organismal process;GO:0051252//regula…
XP_005901746	0	13.5933	0.001	0.993333	9.95613	0.0176338	0.757897	no	DCTN2	PREDICTED: dynactin subunit 2 isoform X1 [Bos mutus]	Organismal Systems	Excretory system	ko04962//Vasopressin-regulated water reabsorption	K10424	-	-	-
XP_014338913	0	25.7433	0.001	0.993333	9.95613	0.0242382	0.843308	no	INTS10	PREDICTED: integrator complex subunit 10-like [Bos mutus]	-	-	-	-	GO:0016591//DNA-directed RNA polymerase II, holoenzyme;GO:0005634//nucleus;GO:0044464//cell part;GO:0043227//membrane-bounded organelle;GO:0044424//intracellular part;GO:1902494//catalytic complex;GO:0005623//cell;GO:0061695//transferase complex, transferring phosphorus-containing groups;GO:0031974//membrane-enclosed lumen;GO:0032991//macromolecular complex;GO:0030880//RNA polymerase complex;GO:0…	-	-
XM_005893668	0	28.9433	0.001	0.99	9.95128	0.023134	0.833611	no	RBM28	PREDICTED: Bos mutus RNA binding motif protein 28 (RBM28), transcript variant X2, mRNA	Genetic Information Processing	Translation	ko03008//Ribosome biogenesis in eukaryotes	K14573	-	GO:1901363//heterocyclic compound binding;GO:0003723//RNA binding;GO:0003676//nucleic acid binding;GO:0005488//binding;GO:0097159//organic cyclic compound binding	-
XM_014476333	0	30.0633	0.001	0.983333	9.94154	0.00411813	0.397272	no	MYADM	PREDICTED: Bos mutus myeloid-associated differentiation marker (MYADM), transcript variant X2, mRNA	-	-	-	-	GO:0005622//intracellular;GO:0044424//intracellular part;GO:0031982//vesicle;GO:0044421//extracellular region part;GO:0015629//actin cytoskeleton;GO:0098589//membrane region;GO:0043226//organelle;GO:1903561//extracellular vesicle;GO:0005856//cytoskeleton;GO:0043228//non-membrane-bounded organelle;GO:0098805//whole membrane;GO:0005623//cell;GO:0031224//intrinsic component of membrane;GO:0043230//e…	-	GO:0046907//intracellular transport;GO:0008154//actin polymerization or depolymerization;GO:0048468//cell development;GO:0007015//actin filament organization;GO:0015031//protein transport;GO:0009888//tissue development;GO:0050793//regulation of developmental process;GO:0002064//epithelial cell development;GO:0051174//regulation of phosphorus metabolic process;GO:0031399//regulation of protein mod…
XP_005895922	0	11.3367	0.001	0.983333	9.94154	0.00574793	0.468144	no	PAQR7	PREDICTED: membrane progestin receptor alpha isoform X1 [Bos mutus]	-	-	-	-	-	-	-
XP_005895923	0	11.3367	0.001	0.983333	9.94154	0.00574388	0.468144	no	PAQR7	PREDICTED: membrane progestin receptor alpha isoform X1 [Bos mutus]	-	-	-	-	-	-	-
XP_014333746	0	11.3367	0.001	0.983333	9.94154	0.00574522	0.468144	no	PAQR7	PREDICTED: membrane progestin receptor alpha isoform X1 [Bos mutus]	-	-	-	-	-	-	-
XP_014333747	0	11.3367	0.001	0.983333	9.94154	0.00575528	0.468144	no	PAQR7	PREDICTED: membrane progestin receptor alpha isoform X1 [Bos mutus]	-	-	-	-	-	-	-
XP_014333748	0	11.3367	0.001	0.983333	9.94154	0.00574843	0.468144	no	PAQR7	PREDICTED: membrane progestin receptor alpha isoform X1 [Bos mutus]	-	-	-	-	-	-	-
XM_005900657	0	13.48	0.001	0.976667	9.93172	0.0177316	0.758415	no	RAD51C	PREDICTED: Bos mutus RAD51 paralog C (RAD51C), transcript variant X2, mRNA	Genetic Information Processing	Replication and repair	ko03460//Fanconi anemia pathway;ko03440//Homologous recombination	K10870	-	-	-
XM_005902999	0.00333333	59.03	0.001	0.97	9.92184	2.53e-05	0.0205433	up	DPYSL2	PREDICTED: Bos mutus dihydropyrimidinase-like 2 (DPYSL2), transcript variant X4, mRNA	Organismal Systems	Development	ko04360//Axon guidance	K07528	GO:1903561//extracellular vesicle;GO:0044424//intracellular part;GO:0044421//extracellular region part;GO:0044444//cytoplasmic part;GO:0031982//vesicle;GO:0043231//intracellular membrane-bounded organelle;GO:0005737//cytoplasm;GO:0015630//microtubule cytoskeleton;GO:0005576//extracellular region;GO:0043232//intracellular non-membrane-bounded organelle;GO:0036477//somatodendritic compartment;GO:00…	GO:0019899//enzyme binding;GO:0005515//protein binding;GO:0019900//kinase binding;GO:0016787//hydrolase activity;GO:0005488//binding;GO:0008092//cytoskeletal protein binding;GO:0003824//catalytic activity;GO:0015631//tubulin binding	GO:0048812//neuron projection morphogenesis;GO:0007417//central nervous system development;GO:0048856//anatomical structure development;GO:0044707//single-multicellular organism process;GO:0032501//multicellular organismal process;GO:0048869//cellular developmental process;GO:0031175//neuron projection development;GO:0000904//cell morphogenesis involved in differentiation;GO:0007275//multicellula…
XP_005889411	0	19	0.001	0.97	9.92184	0.0369549	0.974513	no	MARVELD2	PREDICTED: MARVEL domain-containing protein 2 isoform X1 [Bos mutus]	-	-	-	-	GO:0005623//cell;GO:0043209//myelin sheath;GO:0044424//intracellular part;GO:0043296//apical junction complex;GO:0031224//intrinsic component of membrane;GO:0005737//cytoplasm;GO:0043218//compact myelin;GO:0005886//plasma membrane;GO:0044425//membrane part;GO:0071944//cell periphery;GO:0044464//cell part;GO:0005911//cell-cell junction;GO:0030054//cell junction;GO:0005622//intracellular;GO:0016020…	-	GO:0060429//epithelium development;GO:0044699//single-organism process;GO:0044763//single-organism cellular process;GO:0016043//cellular component organization;GO:0003158//endothelium development;GO:0034330//cell junction organization;GO:0030855//epithelial cell differentiation;GO:0030154//cell differentiation;GO:0002064//epithelial cell development;GO:0044767//single-organism developmental proce…
XP_005908279	0	18.4467	0.001	0.966667	9.91687	0.0384353	0.989301	no	CLIP3	CAP-Gly domain-containing linker protein 3 [Bos taurus]	-	-	-	-	GO:0005623//cell;GO:0044425//membrane part;GO:0044464//cell part;GO:0005774//vacuolar membrane;GO:0098589//membrane region;GO:0005768//endosome;GO:0010008//endosome membrane;GO:0043229//intracellular organelle;GO:0044422//organelle part;GO:0098588//bounding membrane of organelle;GO:0005622//intracellular;GO:0043227//membrane-bounded organelle;GO:0005794//Golgi apparatus;GO:0098857//membrane micro…	GO:0008092//cytoskeletal protein binding;GO:0097367//carbohydrate derivative binding;GO:0008289//lipid binding;GO:0046625//sphingolipid binding;GO:0015631//tubulin binding;GO:0005488//binding;GO:0043208//glycosphingolipid binding;GO:0051861//glycolipid binding;GO:0005515//protein binding	GO:0031111//negative regulation of microtubule polymerization or depolymerization;GO:0044267//cellular protein metabolic process;GO:0048869//cellular developmental process;GO:0044238//primary metabolic process;GO:0070727//cellular macromolecule localization;GO:0006810//transport;GO:0044763//single-organism cellular process;GO:0070507//regulation of microtubule cytoskeleton organization;GO:0071840…
XM_005889274	0	59.9633	0.001	0.946667	9.88671	0.00931416	0.582025	no	MAP3K7	PREDICTED: Bos mutus mitogen-activated protein kinase kinase kinase 7 (MAP3K7), transcript variant X1, mRNA	Organismal Systems;Cellular Processes;Environmental Information Processing	Immune system;Development;Cellular commiunity;Signal transduction	ko04010//MAPK signaling pathway;ko04310//Wnt signaling pathway;ko04152//AMPK signaling pathway;ko04380//Osteoclast differentiation;ko04660//T cell receptor signaling pathway;ko04668//TNF signaling pathway;ko04620//Toll-like receptor signaling pathway;ko04064//NF-kappa B signaling pathway;ko04520//Adherens junction;ko04622//RIG-I-like receptor signaling pathway;ko04621//NOD-like receptor signaling…	K04427	-	-	-
XP_005891382	0	16.9433	0.001	0.94	9.87652	0.0379751	0.983415	no	SARS	PREDICTED: serine--tRNA ligase, cytoplasmic [Bos mutus]	Genetic Information Processing	Translation	ko00970//Aminoacyl-tRNA biosynthesis	K01875	-	-	-
XM_005892821	0	13.6667	0.001	0.936667	9.87139	0.0158013	0.730307	no	ZP3	PREDICTED: Bos mutus zona pellucida glycoprotein 3 (sperm receptor) (ZP3), mRNA	-	-	-	-	-	-	-
XM_014482471	0	16.6667	0.001	0.936667	9.87139	0.0120988	0.656873	no	FBXL16	PREDICTED: Bos mutus F-box and leucine-rich repeat protein 16 (FBXL16), mRNA	-	-	-	-	-	-	-
XP_005903820	0	10.29	0.001	0.933333	9.86625	0.0238562	0.839094	no	XRCC4	PREDICTED: DNA repair protein XRCC4 isoform X2 [Bos mutus]	Genetic Information Processing	Replication and repair	ko03450//Non-homologous end-joining	K10886	GO:0005737//cytoplasm;GO:0044428//nuclear part;GO:0031974//membrane-enclosed lumen;GO:0043226//organelle;GO:0044424//intracellular part;GO:0005634//nucleus;GO:0043227//membrane-bounded organelle;GO:0005856//cytoskeleton;GO:0043232//intracellular non-membrane-bounded organelle;GO:0044446//intracellular organelle part;GO:0044444//cytoplasmic part;GO:0005622//intracellular;GO:0070013//intracellular …	GO:0005488//binding;GO:0005515//protein binding	GO:0009314//response to radiation;GO:0006259//DNA metabolic process;GO:1901360//organic cyclic compound metabolic process;GO:0000726//non-recombinational repair;GO:0065009//regulation of molecular function;GO:0009987//cellular process;GO:0044093//positive regulation of molecular function;GO:0034641//cellular nitrogen compound metabolic process;GO:0006974//cellular response to DNA damage stimulus;…
XP_005906874	0.00666667	25.38	0.001	0.933333	9.86625	0.0245437	0.846933	no	LRRFIP1	PREDICTED: leucine-rich repeat flightless-interacting protein 2 isoform X3 [Bos mutus]	-	-	-	-	GO:0005623//cell;GO:0016020//membrane;GO:0044424//intracellular part;GO:0005622//intracellular;GO:0044464//cell part	GO:0005488//binding;GO:0046983//protein dimerization activity;GO:0005515//protein binding;GO:1901363//heterocyclic compound binding;GO:0097159//organic cyclic compound binding;GO:0003676//nucleic acid binding	-
XM_014478470	0	24.5733	0.001	0.93	9.86109	0.00577392	0.468157	no	ZFP90	PREDICTED: Bos mutus ZFP90 zinc finger protein (ZFP90), transcript variant X4, mRNA	-	-	-	-	GO:0043226//organelle;GO:0043229//intracellular organelle;GO:0005622//intracellular;GO:0044464//cell part;GO:0043227//membrane-bounded organelle;GO:0043231//intracellular membrane-bounded organelle;GO:0005623//cell;GO:0044424//intracellular part	GO:0003676//nucleic acid binding;GO:0043167//ion binding;GO:0097159//organic cyclic compound binding;GO:0001071//nucleic acid binding transcription factor activity;GO:1901363//heterocyclic compound binding;GO:0005488//binding;GO:0003700//transcription factor activity, sequence-specific DNA binding;GO:0043169//cation binding;GO:0000982//transcription factor activity, RNA polymerase II core promote…	GO:0044271//cellular nitrogen compound biosynthetic process;GO:0044260//cellular macromolecule metabolic process;GO:0065009//regulation of molecular function;GO:0016070//RNA metabolic process;GO:0044092//negative regulation of molecular function;GO:0034645//cellular macromolecule biosynthetic process;GO:0009059//macromolecule biosynthetic process;GO:0006139//nucleobase-containing compound metabol…
XP_005899384	0	16.5467	0.001	0.93	9.86109	0.0212487	0.804664	no	SLC16A6	PREDICTED: monocarboxylate transporter 7 [Bos mutus]	-	-	-	-	-	-	-
XP_005906137	0	42.2067	0.001	0.93	9.86109	0.0147311	0.707027	no	CAMTA2	PREDICTED: calmodulin-binding transcription activator 2 isoform X4 [Bos mutus]	-	-	-	-	-	-	-
XP_005895362	0	5.21333	0.001	0.91	9.82972	0.0205399	0.803243	no	FGF17	PREDICTED: fibroblast growth factor 17 isoform X1 [Ovis aries]	Cellular Processes;Environmental Information Processing	Signal transduction;Cell motility	ko04151//PI3K-Akt signaling pathway;ko04010//MAPK signaling pathway;ko04014//Ras signaling pathway;ko04810//Regulation of actin cytoskeleton;ko04015//Rap1 signaling pathway	K04358	GO:0044464//cell part;GO:0044421//extracellular region part;GO:0005576//extracellular region;GO:0005623//cell	GO:0098772//molecular function regulator;GO:0003824//catalytic activity;GO:0005085//guanyl-nucleotide exchange factor activity;GO:0070851//growth factor receptor binding;GO:0004672//protein kinase activity;GO:0005102//receptor binding;GO:0052742//phosphatidylinositol kinase activity;GO:0016301//kinase activity;GO:0052813//phosphatidylinositol bisphosphate kinase activity;GO:0005104//fibroblast gr…	GO:0008283//cell proliferation;GO:0050896//response to stimulus;GO:0046474//glycerophospholipid biosynthetic process;GO:0065009//regulation of molecular function;GO:0006644//phospholipid metabolic process;GO:0006464//cellular protein modification process;GO:0045017//glycerolipid biosynthetic process;GO:0006661//phosphatidylinositol biosynthetic process;GO:0044763//single-organism cellular process…
XP_005895851	0	14.2033	0.001	0.91	9.82972	0.0486631	1	no	LOC102266657	Chromosome 1 open reading frame 141 [Homo sapiens]	-	-	-	-	-	-	-
XM_005891303	0	42.3	0.001	0.906667	9.82443	0.000182979	0.0732818	no	AMPD2	PREDICTED: Bos mutus adenosine monophosphate deaminase 2 (AMPD2), transcript variant X1, mRNA	Metabolism	Nucleotide metabolism	ko00230//Purine metabolism	K01490	GO:0005623//cell;GO:0005622//intracellular;GO:0005737//cytoplasm;GO:0044464//cell part;GO:0044444//cytoplasmic part;GO:0044424//intracellular part	GO:0043169//cation binding;GO:0005488//binding;GO:0016810//hydrolase activity, acting on carbon-nitrogen (but not peptide) bonds;GO:0016787//hydrolase activity;GO:0003824//catalytic activity;GO:0016814//hydrolase activity, acting on carbon-nitrogen (but not peptide) bonds, in cyclic amidines;GO:0047623//adenosine-phosphate deaminase activity;GO:0043167//ion binding;GO:0019239//deaminase activity	GO:0072521//purine-containing compound metabolic process;GO:0048871//multicellular organismal homeostasis;GO:0006725//cellular aromatic compound metabolic process;GO:1901137//carbohydrate derivative biosynthetic process;GO:0034654//nucleobase-containing compound biosynthetic process;GO:0071704//organic substance metabolic process;GO:0009156//ribonucleoside monophosphate biosynthetic process;GO:00…
XM_005891740	0	14.11	0.001	0.906667	9.82443	0.0159666	0.735256	no	LOC102272258	PREDICTED: Bos mutus cytochrome P450 26B1 (LOC102272258), transcript variant X2, mRNA	Metabolism	Metabolism of cofactors and vitamins	ko00830//Retinol metabolism	K12664	-	-	-
XP_014332777	0	42.0633	0.001	0.903333	9.81911	0.0148617	0.709303	no	POLRMT	PREDICTED: LOW QUALITY PROTEIN: DNA-directed RNA polymerase, mitochondrial [Bos mutus]	-	-	-	-	GO:0043227//membrane-bounded organelle;GO:0044444//cytoplasmic part;GO:0005737//cytoplasm;GO:0043231//intracellular membrane-bounded organelle;GO:0043226//organelle;GO:0005622//intracellular;GO:0044464//cell part;GO:0044424//intracellular part;GO:0043229//intracellular organelle;GO:0005623//cell;GO:0005739//mitochondrion	GO:0003723//RNA binding;GO:0005488//binding;GO:0016779//nucleotidyltransferase activity;GO:0016740//transferase activity;GO:0097159//organic cyclic compound binding;GO:0034062//RNA polymerase activity;GO:0016772//transferase activity, transferring phosphorus-containing groups;GO:0003824//catalytic activity;GO:0003676//nucleic acid binding;GO:1901363//heterocyclic compound binding	GO:0010467//gene expression;GO:0006139//nucleobase-containing compound metabolic process;GO:0044237//cellular metabolic process;GO:1901360//organic cyclic compound metabolic process;GO:0006807//nitrogen compound metabolic process;GO:0044260//cellular macromolecule metabolic process;GO:0034641//cellular nitrogen compound metabolic process;GO:0044238//primary metabolic process;GO:0000959//mitochond…
XM_014477173	0	20.5933	0.001	0.9	9.81378	0.0320175	0.943072	no	RNMT	PREDICTED: Bos mutus RNA (guanine-7-) methyltransferase (RNMT), transcript variant X2, mRNA	Genetic Information Processing	Translation	ko03015//mRNA surveillance pathway	K00565	GO:0034518//RNA cap binding complex;GO:0070013//intracellular organelle lumen;GO:0043226//organelle;GO:0032991//macromolecular complex;GO:0031974//membrane-enclosed lumen;GO:0043233//organelle lumen;GO:0043231//intracellular membrane-bounded organelle;GO:0005622//intracellular;GO:0043229//intracellular organelle;GO:0043227//membrane-bounded organelle;GO:0044446//intracellular organelle part;GO:00…	GO:0016740//transferase activity;GO:0008168//methyltransferase activity;GO:0008170//N-methyltransferase activity;GO:0016741//transferase activity, transferring one-carbon groups;GO:0003824//catalytic activity	GO:0044260//cellular macromolecule metabolic process;GO:0008152//metabolic process;GO:0006725//cellular aromatic compound metabolic process;GO:0006139//nucleobase-containing compound metabolic process;GO:0043412//macromolecule modification;GO:0043414//macromolecule methylation;GO:0044238//primary metabolic process;GO:0043170//macromolecule metabolic process;GO:0006397//mRNA processing;GO:0090304/…
XP_005893586	0	9.57	0.001	0.89	9.79766	0.00829208	0.549784	no	P2RY6	PREDICTED: P2Y purinoceptor 6 [Bos mutus]	Environmental Information Processing	Signaling molecules and interaction	ko04080//Neuroactive ligand-receptor interaction	K04272	GO:0031224//intrinsic component of membrane;GO:0044425//membrane part;GO:0016020//membrane	GO:0001608//G-protein coupled nucleotide receptor activity;GO:0071553//G-protein coupled pyrimidinergic nucleotide receptor activity;GO:0004872//receptor activity;GO:0004930//G-protein coupled receptor activity;GO:0099600//transmembrane receptor activity;GO:0060089//molecular transducer activity;GO:0016502//nucleotide receptor activity;GO:0004871//signal transducer activity;GO:0004888//transmembr…	GO:0051716//cellular response to stimulus;GO:0050896//response to stimulus;GO:0007186//G-protein coupled receptor signaling pathway;GO:0009719//response to endogenous stimulus;GO:0006810//transport;GO:0051234//establishment of localization;GO:0044700//single organism signaling;GO:0035588//G-protein coupled purinergic receptor signaling pathway;GO:0050789//regulation of biological process;GO:00068…
XM_005908743	0.0166667	48.6933	0.001	0.886667	9.79225	0.00165492	0.25656	no	HDAC9	PREDICTED: Bos mutus histone deacetylase 9 (HDAC9), transcript variant X4, mRNA	-	-	-	-	GO:0043231//intracellular membrane-bounded organelle;GO:0005622//intracellular;GO:0044464//cell part;GO:0043234//protein complex;GO:0043229//intracellular organelle;GO:0044424//intracellular part;GO:0043226//organelle;GO:0005623//cell;GO:0032991//macromolecular complex;GO:0043227//membrane-bounded organelle	GO:0016811//hydrolase activity, acting on carbon-nitrogen (but not peptide) bonds, in linear amides;GO:0004407//histone deacetylase activity;GO:0034979//NAD-dependent protein deacetylase activity;GO:0019213//deacetylase activity;GO:0008134//transcription factor binding;GO:0019901//protein kinase binding;GO:0043169//cation binding;GO:0033558//protein deacetylase activity;GO:0016810//hydrolase acti…	GO:0032774//RNA biosynthetic process;GO:0016477//cell migration;GO:0043534//blood vessel endothelial cell migration;GO:0048856//anatomical structure development;GO:0002040//sprouting angiogenesis;GO:0001667//ameboidal-type cell migration;GO:0009059//macromolecule biosynthetic process;GO:0043542//endothelial cell migration;GO:0040011//locomotion;GO:0072359//circulatory system development;GO:001657…
XM_014477088	0	24.6667	0.001	0.886667	9.79225	0.0274471	0.880867	no	PKD2L1	PREDICTED: Bos mutus polycystic kidney disease 2-like 1 (PKD2L1), transcript variant X2, mRNA	-	-	-	-	-	-	-
XM_014481594	0	18.3167	0.001	0.88	9.78136	0.0114512	0.641962	no	AZIN2	PREDICTED: Bos mutus antizyme inhibitor 2 (AZIN2), transcript variant X3, mRNA	Metabolism	Amino acid metabolism	ko00330//Arginine and proline metabolism	K01583	-	-	-
XM_005904738	0	25.5167	0.001	0.873333	9.77039	0.00629951	0.484751	no	PLBD2	PREDICTED: Bos mutus phospholipase B domain containing 2 (PLBD2), transcript variant X2, mRNA	-	-	-	-	GO:0031982//vesicle;GO:0005737//cytoplasm;GO:1903561//extracellular vesicle;GO:0044464//cell part;GO:0043231//intracellular membrane-bounded organelle;GO:0044444//cytoplasmic part;GO:0005622//intracellular;GO:0044421//extracellular region part;GO:0005576//extracellular region;GO:0005623//cell;GO:0043226//organelle;GO:0005773//vacuole;GO:0044424//intracellular part;GO:0043229//intracellular organe…	GO:0003824//catalytic activity	GO:0044699//single-organism process;GO:0071704//organic substance metabolic process;GO:0044710//single-organism metabolic process;GO:0008152//metabolic process;GO:0044238//primary metabolic process;GO:0006629//lipid metabolic process
XM_005899946	0	36.16	0.001	0.87	9.76487	0.000161798	0.0689794	no	KLHL13	PREDICTED: Bos mutus kelch-like family member 13 (KLHL13), transcript variant X1, mRNA	Genetic Information Processing	Folding, sorting and degradation	ko04120//Ubiquitin mediated proteolysis	K10447	-	-	-
XM_005890637	0	27.5	0.001	0.856667	9.74259	0.00591202	0.473665	no	PDE6C	PREDICTED: Bos mutus phosphodiesterase 6C, cGMP-specific, cone, alpha prime (PDE6C), transcript variant X1, mRNA	Metabolism	Nucleotide metabolism	ko00230//Purine metabolism	K13757	GO:0016020//membrane	GO:0043169//cation binding;GO:0004114//3',5'-cyclic-nucleotide phosphodiesterase activity;GO:0000166//nucleotide binding;GO:0004112//cyclic-nucleotide phosphodiesterase activity;GO:0042578//phosphoric ester hydrolase activity;GO:0036094//small molecule binding;GO:0016788//hydrolase activity, acting on ester bonds;GO:1901363//heterocyclic compound binding;GO:1901265//nucleoside phosphate binding;G…	GO:0030154//cell differentiation;GO:0048468//cell development;GO:0048856//anatomical structure development;GO:0009887//animal organ morphogenesis;GO:0009987//cellular process;GO:0048513//animal organ development;GO:0042462//eye photoreceptor cell development;GO:0050896//response to stimulus;GO:0009583//detection of light stimulus;GO:0007165//signal transduction;GO:0003008//system process;GO:00071…
XP_005890699	0	27.5	0.001	0.856667	9.74259	0.00591379	0.473665	no	PDE6C	PREDICTED: cone cGMP-specific 3',5'-cyclic phosphodiesterase subunit alpha' isoform X1 [Bos mutus]	Metabolism	Nucleotide metabolism	ko00230//Purine metabolism	K13757	GO:0016020//membrane	GO:0016787//hydrolase activity;GO:0030551//cyclic nucleotide binding;GO:1901265//nucleoside phosphate binding;GO:0008081//phosphoric diester hydrolase activity;GO:0005488//binding;GO:0016788//hydrolase activity, acting on ester bonds;GO:0000166//nucleotide binding;GO:0043169//cation binding;GO:0042578//phosphoric ester hydrolase activity;GO:0003824//catalytic activity;GO:0043167//ion binding;GO:0…	GO:0007275//multicellular organism development;GO:0007423//sensory organ development;GO:0044707//single-multicellular organism process;GO:0009581//detection of external stimulus;GO:0048869//cellular developmental process;GO:0050953//sensory perception of light stimulus;GO:0051606//detection of stimulus;GO:0030182//neuron differentiation;GO:0001654//eye development;GO:0023052//signaling;GO:0009887…
XP_014337167	0	16.08	0.001	0.85	9.73132	0.0455259	1	no	NXF3	PREDICTED: nuclear RNA export factor 3-like [Bubalus bubalis]	Genetic Information Processing	Translation	ko03013//RNA transport;ko03015//mRNA surveillance pathway;ko03008//Ribosome biogenesis in eukaryotes	K14284	GO:0044424//intracellular part;GO:0005623//cell;GO:0044464//cell part;GO:0005622//intracellular	GO:0097159//organic cyclic compound binding;GO:0003676//nucleic acid binding;GO:0003723//RNA binding;GO:0044822//poly(A) RNA binding;GO:0005488//binding;GO:1901363//heterocyclic compound binding	GO:0071702//organic substance transport;GO:0071705//nitrogen compound transport;GO:0051169//nuclear transport;GO:0050657//nucleic acid transport;GO:0033036//macromolecule localization;GO:0051641//cellular localization;GO:0006403//RNA localization;GO:0015931//nucleobase-containing compound transport;GO:0006913//nucleocytoplasmic transport;GO:0050658//RNA transport;GO:0051236//establishment of RNA …
XP_014334869	0	16.4167	0.001	0.843333	9.71996	0.041765	1	no	CCT5	PREDICTED: T-complex protein 1 subunit epsilon [Bos mutus]	-	-	-	-	GO:1903561//extracellular vesicle;GO:0044446//intracellular organelle part;GO:0044430//cytoskeletal part;GO:0005623//cell;GO:0031982//vesicle;GO:0005622//intracellular;GO:0043234//protein complex;GO:0043230//extracellular organelle;GO:0044464//cell part;GO:0043226//organelle;GO:0005576//extracellular region;GO:0043233//organelle lumen;GO:0043227//membrane-bounded organelle;GO:0015630//microtubule…	GO:0005488//binding;GO:0097159//organic cyclic compound binding;GO:0032550//purine ribonucleoside binding;GO:0001883//purine nucleoside binding;GO:0036094//small molecule binding;GO:1901363//heterocyclic compound binding;GO:0005515//protein binding;GO:0008092//cytoskeletal protein binding;GO:0001882//nucleoside binding;GO:0015631//tubulin binding;GO:0032549//ribonucleoside binding;GO:0097367//car…	GO:0090304//nucleic acid metabolic process;GO:0000723//telomere maintenance;GO:0016043//cellular component organization;GO:0051234//establishment of localization;GO:1901576//organic substance biosynthetic process;GO:0051707//response to other organism;GO:1903829//positive regulation of cellular protein localization;GO:0010833//telomere maintenance via telomere lengthening;GO:1901360//organic cycl…
XM_005898691	0	25.3333	0.001	0.84	9.71425	0.00543994	0.453877	no	HCN3	PREDICTED: Bos mutus hyperpolarization activated cyclic nucleotide gated potassium channel 3 (HCN3), mRNA	-	-	-	-	GO:0016020//membrane;GO:0005886//plasma membrane;GO:0044425//membrane part;GO:0071944//cell periphery;GO:0044464//cell part;GO:0005623//cell;GO:0031224//intrinsic component of membrane	GO:0046873//metal ion transmembrane transporter activity;GO:0005272//sodium channel activity;GO:0015081//sodium ion transmembrane transporter activity;GO:0022838//substrate-specific channel activity;GO:0022857//transmembrane transporter activity;GO:0008324//cation transmembrane transporter activity;GO:0005267//potassium channel activity;GO:0005216//ion channel activity;GO:0015075//ion transmembra…	GO:0044763//single-organism cellular process;GO:0051179//localization;GO:0009987//cellular process;GO:1902578//single-organism localization;GO:0006813//potassium ion transport;GO:0042391//regulation of membrane potential;GO:0044765//single-organism transport;GO:0065007//biological regulation;GO:0006811//ion transport;GO:0030001//metal ion transport;GO:0006814//sodium ion transport;GO:0006812//cat…
XP_014337311	0	17	0.001	0.84	9.71425	0.00663153	0.49461	no	LOC102270628	PREDICTED: zinc finger protein 471-like [Bos mutus]	-	-	-	-	-	-	-
XM_005897272	0	15.6533	0.001	0.833333	9.70275	0.0466298	1	no	RBMS1	PREDICTED: Bos mutus RNA binding motif, single stranded interacting protein 1 (RBMS1), transcript variant X1, mRNA	-	-	-	-	GO:0043226//organelle;GO:0043227//membrane-bounded organelle;GO:0005623//cell;GO:0043231//intracellular membrane-bounded organelle;GO:0044464//cell part;GO:0044424//intracellular part;GO:0005622//intracellular;GO:0043229//intracellular organelle	GO:0003676//nucleic acid binding;GO:0003677//DNA binding;GO:0005488//binding;GO:0003723//RNA binding;GO:0097159//organic cyclic compound binding;GO:1901363//heterocyclic compound binding	GO:0006139//nucleobase-containing compound metabolic process;GO:0006725//cellular aromatic compound metabolic process;GO:0046483//heterocycle metabolic process;GO:0090304//nucleic acid metabolic process;GO:0044260//cellular macromolecule metabolic process;GO:0009987//cellular process;GO:0006259//DNA metabolic process;GO:0043170//macromolecule metabolic process;GO:0010467//gene expression;GO:00717…
XP_005906657	0	22.73	0.001	0.83	9.69697	0.027939	0.886665	no	COG2	PREDICTED: conserved oligomeric Golgi complex subunit 2 [Bos mutus]	-	-	-	-	-	-	-
XP_005891686	0	18.97	0.001	0.826667	9.69116	0.00918616	0.578127	no	ZAP70	tyrosine-protein kinase ZAP-70 [Bos taurus]	Environmental Information Processing;Organismal Systems	Signal transduction;Immune system	ko04014//Ras signaling pathway;ko04650//Natural killer cell mediated cytotoxicity;ko04660//T cell receptor signaling pathway;ko04064//NF-kappa B signaling pathway	K07360	-	-	-
XP_005893313	0	21.89	0.001	0.82	9.67948	0.031209	0.933423	no	GNL2	PREDICTED: nucleolar GTP-binding protein 2 [Bos mutus]	Genetic Information Processing	Translation	ko03008//Ribosome biogenesis in eukaryotes	K14537	-	-	-
XP_005901200	0	11.7267	0.001	0.82	9.67948	0.0237433	0.838425	no	ACAA1	PREDICTED: 3-ketoacyl-CoA thiolase B, peroxisomal isoform X1 [Bos mutus]	Cellular Processes;Metabolism;Organismal Systems	Lipid metabolism;Amino acid metabolism;Endocrine system;Transport and catabolism;Global and Overview	ko04146//Peroxisome;ko03320//PPAR signaling pathway;ko00280//Valine, leucine and isoleucine degradation;ko01212//Fatty acid metabolism;ko00071//Fatty acid degradation;ko00592//alpha-Linolenic acid metabolism;ko01040//Biosynthesis of unsaturated fatty acids	K07513	GO:0043231//intracellular membrane-bounded organelle;GO:0042579//microbody;GO:0044444//cytoplasmic part;GO:0044464//cell part;GO:0005737//cytoplasm;GO:0005623//cell;GO:0044424//intracellular part;GO:0043227//membrane-bounded organelle;GO:0005622//intracellular;GO:0043229//intracellular organelle;GO:0043226//organelle	GO:0016634//oxidoreductase activity, acting on the CH-CH group of donors, oxygen as acceptor;GO:0016491//oxidoreductase activity;GO:0016740//transferase activity;GO:0016746//transferase activity, transferring acyl groups;GO:0003824//catalytic activity;GO:0003997//acyl-CoA oxidase activity;GO:0016627//oxidoreductase activity, acting on the CH-CH group of donors	GO:0006631//fatty acid metabolic process;GO:0006629//lipid metabolic process;GO:0044712//single-organism catabolic process;GO:0046395//carboxylic acid catabolic process;GO:0044710//single-organism metabolic process;GO:1901360//organic cyclic compound metabolic process;GO:0044763//single-organism cellular process;GO:0043436//oxoacid metabolic process;GO:0044255//cellular lipid metabolic process;GO…
XP_005910435	0	7.23667	0.001	0.82	9.67948	0.038981	0.99613	no	RPP38	PREDICTED: ribonuclease P protein subunit p38 [Bos mutus]	Genetic Information Processing	Translation	ko03013//RNA transport;ko03008//Ribosome biogenesis in eukaryotes	K14523	-	-	-
XP_014338662	0	7.23667	0.001	0.82	9.67948	0.038978	0.99613	no	RPP38	PREDICTED: ribonuclease P protein subunit p38 [Bos mutus]	Genetic Information Processing	Translation	ko03013//RNA transport;ko03008//Ribosome biogenesis in eukaryotes	K14523	-	-	-
XP_014338663	0	7.23667	0.001	0.82	9.67948	0.0389833	0.99613	no	RPP38	PREDICTED: ribonuclease P protein subunit p38 [Bos mutus]	Genetic Information Processing	Translation	ko03013//RNA transport;ko03008//Ribosome biogenesis in eukaryotes	K14523	-	-	-
XP_014338664	0	7.23667	0.001	0.82	9.67948	0.0389872	0.99613	no	RPP38	PREDICTED: ribonuclease P protein subunit p38 [Bos mutus]	Genetic Information Processing	Translation	ko03013//RNA transport;ko03008//Ribosome biogenesis in eukaryotes	K14523	-	-	-
XM_014477779	0	15.5567	0.001	0.816667	9.6736	0.0126939	0.667509	no	ADAT1	PREDICTED: Bos mutus adenosine deaminase, tRNA-specific 1 (ADAT1), mRNA	-	-	-	-	-	GO:0016810//hydrolase activity, acting on carbon-nitrogen (but not peptide) bonds;GO:0016814//hydrolase activity, acting on carbon-nitrogen (but not peptide) bonds, in cyclic amidines;GO:0003824//catalytic activity;GO:0004000//adenosine deaminase activity;GO:0019239//deaminase activity;GO:0016787//hydrolase activity	GO:0009987//cellular process;GO:0006725//cellular aromatic compound metabolic process;GO:1901360//organic cyclic compound metabolic process;GO:0071704//organic substance metabolic process;GO:0008152//metabolic process;GO:0044260//cellular macromolecule metabolic process;GO:0006139//nucleobase-containing compound metabolic process;GO:0016070//RNA metabolic process;GO:0034641//cellular nitrogen com…
XP_005894100	0	26.6367	0.001	0.813333	9.6677	0.00510807	0.442631	no	AP5B1	PREDICTED: AP-5 complex subunit beta-1 [Bos mutus]	-	-	-	-	-	-	-
XP_005899249	0	43.5833	0.001	0.81	9.66178	0.0141843	0.695619	no	CNTNAP1	PREDICTED: contactin-associated protein 1 [Bos mutus]	Environmental Information Processing	Signaling molecules and interaction	ko04514//Cell adhesion molecules (CAMs)	K07379	GO:0071944//cell periphery;GO:0043005//neuron projection;GO:0016021//integral component of membrane;GO:0031224//intrinsic component of membrane;GO:0033267//axon part;GO:0044425//membrane part;GO:0097458//neuron part;GO:0005886//plasma membrane;GO:0044463//cell projection part;GO:0016020//membrane;GO:0005887//integral component of plasma membrane;GO:0044464//cell part;GO:0042995//cell projection;G…	-	GO:0048856//anatomical structure development;GO:0016043//cellular component organization;GO:0048468//cell development;GO:0044763//single-organism cellular process;GO:0022008//neurogenesis;GO:0030154//cell differentiation;GO:0044707//single-multicellular organism process;GO:0007275//multicellular organism development;GO:0006996//organelle organization;GO:0007043//cell-cell junction assembly;GO:003…
XM_005911143	0	12	0.001	0.796667	9.63783	0.0191137	0.781641	no	PAX5	PREDICTED: Bos mutus paired box 5 (PAX5), transcript variant X1, mRNA	-	-	-	-	GO:0044424//intracellular part;GO:0043231//intracellular membrane-bounded organelle;GO:0043227//membrane-bounded organelle;GO:0005623//cell;GO:0043226//organelle;GO:0005622//intracellular;GO:0043229//intracellular organelle;GO:0044464//cell part	GO:0000976//transcription regulatory region sequence-specific DNA binding;GO:0000975//regulatory region DNA binding;GO:0003700//transcription factor activity, sequence-specific DNA binding;GO:0043565//sequence-specific DNA binding;GO:1990837//sequence-specific double-stranded DNA binding;GO:1901363//heterocyclic compound binding;GO:0001071//nucleic acid binding transcription factor activity;GO:00…	GO:0048598//embryonic morphogenesis;GO:0001501//skeletal system development;GO:0031060//regulation of histone methylation;GO:0006351//transcription, DNA-templated;GO:0044249//cellular biosynthetic process;GO:0009887//animal organ morphogenesis;GO:0044767//single-organism developmental process;GO:0032268//regulation of cellular protein metabolic process;GO:0050794//regulation of cellular process;G…
XP_005889118	0	14.58	0.001	0.793333	9.63178	0.0494612	1	no	DEPDC1B	PREDICTED: DEP domain-containing protein 1B isoform X1 [Bos mutus]	-	-	-	-	GO:0005623//cell;GO:0044464//cell part	-	GO:1905114//cell surface receptor signaling pathway involved in cell-cell signaling;GO:0006928//movement of cell or subcellular component;GO:0007267//cell-cell signaling;GO:0050790//regulation of catalytic activity;GO:0007154//cell communication;GO:0040011//locomotion;GO:0016055//Wnt signaling pathway;GO:0044763//single-organism cellular process;GO:0043087//regulation of GTPase activity;GO:006500…
XM_014482688	0	19.3	0.001	0.783333	9.61348	0.0135935	0.682624	no	SLC6A8	PREDICTED: Bos mutus solute carrier family 6 (neurotransmitter transporter), member 8 (SLC6A8), transcript variant X2, mRNA	-	-	-	-	-	-	-
XP_005905458	0.0333333	19.9267	0.001	0.783333	9.61348	0.00854371	0.558478	no	LRRC45	PREDICTED: leucine-rich repeat-containing protein 45 [Bos mutus]	-	-	-	-	GO:0015630//microtubule cytoskeleton;GO:0044422//organelle part;GO:0044446//intracellular organelle part;GO:0005622//intracellular;GO:0005815//microtubule organizing center;GO:0044430//cytoskeletal part;GO:0044424//intracellular part;GO:0005856//cytoskeleton;GO:0043226//organelle;GO:0005623//cell;GO:0044464//cell part;GO:0016020//membrane;GO:0043232//intracellular non-membrane-bounded organelle;G…	-	-
XP_005888581	0	73.5833	0.001	0.776667	9.60115	0.00697168	0.502932	no	NOTCH1	PREDICTED: LOW QUALITY PROTEIN: neurogenic locus notch homolog protein 1 [Bos mutus]	Organismal Systems;Environmental Information Processing	Development;Signal transduction;Endocrine system	ko04919//Thyroid hormone signaling pathway;ko04330//Notch signaling pathway;ko04320//Dorso-ventral axis formation	K02599	GO:0030054//cell junction;GO:0031224//intrinsic component of membrane;GO:0032991//macromolecular complex;GO:0016020//membrane;GO:0044464//cell part;GO:0043234//protein complex;GO:0043229//intracellular organelle;GO:0043231//intracellular membrane-bounded organelle;GO:0005622//intracellular;GO:0070161//anchoring junction;GO:0005737//cytoplasm;GO:0005623//cell;GO:0043226//organelle;GO:0044424//intr…	GO:0046872//metal ion binding;GO:0098811//transcriptional repressor activity, RNA polymerase II activating transcription factor binding;GO:0046983//protein dimerization activity;GO:0005515//protein binding;GO:0043167//ion binding;GO:0098772//molecular function regulator;GO:0005488//binding;GO:0044877//macromolecular complex binding;GO:0060089//molecular transducer activity;GO:0003677//DNA binding…	GO:0060840//artery development;GO:0010631//epithelial cell migration;GO:0048513//animal organ development;GO:0007166//cell surface receptor signaling pathway;GO:0003156//regulation of animal organ formation;GO:0043583//ear development;GO:0060113//inner ear receptor cell differentiation;GO:0007399//nervous system development;GO:0009952//anterior/posterior pattern specification;GO:0007275//multicel…
XP_005894371	0	23.37	0.001	0.776667	9.60115	0.0293055	0.90612	no	BCAR1	PREDICTED: LOW QUALITY PROTEIN: breast cancer anti-estrogen resistance protein 1 [Bos mutus]	Environmental Information Processing;Cellular Processes;Organismal Systems	Signal transduction;Cellular commiunity;Cell motility;Immune system	ko04510//Focal adhesion;ko04810//Regulation of actin cytoskeleton;ko04015//Rap1 signaling pathway;ko04062//Chemokine signaling pathway;ko04670//Leukocyte transendothelial migration	K05726	GO:0031252//cell leading edge;GO:0044464//cell part;GO:0005623//cell;GO:0005924//cell-substrate adherens junction;GO:0044428//nuclear part;GO:0043228//non-membrane-bounded organelle;GO:0031981//nuclear lumen;GO:0005912//adherens junction;GO:0043227//membrane-bounded organelle;GO:0016020//membrane;GO:0044424//intracellular part;GO:0044422//organelle part;GO:0005622//intracellular;GO:0005634//nucle…	GO:0005515//protein binding;GO:0019899//enzyme binding;GO:0019900//kinase binding;GO:0005488//binding	GO:0010632//regulation of epithelial cell migration;GO:0050776//regulation of immune response;GO:0030036//actin cytoskeleton organization;GO:0040012//regulation of locomotion;GO:0048518//positive regulation of biological process;GO:0044699//single-organism process;GO:1902589//single-organism organelle organization;GO:0051270//regulation of cellular component movement;GO:0002376//immune system pro…
XP_014337735	0	13.8367	0.001	0.77	9.58871	0.0227511	0.833386	no	TRIM65	PREDICTED: tripartite motif-containing protein 65 isoform X2 [Bos taurus]	-	-	-	-	-	GO:0043167//ion binding;GO:0046914//transition metal ion binding;GO:0043169//cation binding;GO:0046872//metal ion binding;GO:0005488//binding	GO:0006914//autophagy;GO:0009987//cellular process
XP_005887739	0	19.0467	0.001	0.766667	9.58246	0.0369607	0.974513	no	TBC1D25	PREDICTED: TBC1 domain family member 25 isoform X2 [Bos mutus]	-	-	-	-	-	-	-
XP_005900006	0	12.7333	0.001	0.766667	9.58246	0.0170755	0.750859	no	MFSD9	PREDICTED: major facilitator superfamily domain-containing protein 9 [Bos mutus]	-	-	-	-	-	-	-
XM_014476471	0	13.7933	0.001	0.763333	9.57617	0.0183109	0.76904	no	TRMT10C	PREDICTED: Bos mutus tRNA methyltransferase 10C, mitochondrial RNase P subunit (TRMT10C), transcript variant X4, mRNA	-	-	-	-	GO:0044464//cell part;GO:0044444//cytoplasmic part;GO:0031981//nuclear lumen;GO:0043227//membrane-bounded organelle;GO:0005737//cytoplasm;GO:0044424//intracellular part;GO:0005634//nucleus;GO:0044446//intracellular organelle part;GO:0043231//intracellular membrane-bounded organelle;GO:0005739//mitochondrion;GO:0043233//organelle lumen;GO:0070013//intracellular organelle lumen;GO:0044422//organell…	GO:0005488//binding;GO:0016740//transferase activity;GO:1901363//heterocyclic compound binding;GO:0003723//RNA binding;GO:0097159//organic cyclic compound binding;GO:0003676//nucleic acid binding;GO:0016741//transferase activity, transferring one-carbon groups;GO:0003824//catalytic activity	GO:0010467//gene expression;GO:0034641//cellular nitrogen compound metabolic process;GO:0006807//nitrogen compound metabolic process;GO:0006399//tRNA metabolic process;GO:0034660//ncRNA metabolic process;GO:0043170//macromolecule metabolic process;GO:0044260//cellular macromolecule metabolic process;GO:0016070//RNA metabolic process;GO:0044238//primary metabolic process;GO:0006396//RNA processing…
XP_005906753	0	7.79667	0.001	0.76	9.56986	0.0360246	0.974513	no	SPATA22	PREDICTED: spermatogenesis-associated protein 22 isoform X5 [Bos mutus]	-	-	-	-	GO:0043232//intracellular non-membrane-bounded organelle;GO:0043228//non-membrane-bounded organelle;GO:0043226//organelle;GO:0005623//cell;GO:0031224//intrinsic component of membrane;GO:0044464//cell part;GO:0005622//intracellular;GO:0016020//membrane;GO:0044425//membrane part;GO:0043229//intracellular organelle;GO:0044424//intracellular part	-	GO:0000280//nuclear division;GO:0051726//regulation of cell cycle;GO:0019953//sexual reproduction;GO:1903046//meiotic cell cycle process;GO:0032502//developmental process;GO:0022402//cell cycle process;GO:0044703//multi-organism reproductive process;GO:0044707//single-multicellular organism process;GO:0022414//reproductive process;GO:0050794//regulation of cellular process;GO:0050789//regulation …
XP_005887335	0	4.35667	0.001	0.753333	9.55714	0.0304474	0.919247	no	LOC102271469	PREDICTED: GRB2-related adapter protein [Bos mutus]	-	-	-	-	GO:0005622//intracellular;GO:0044464//cell part;GO:0005623//cell;GO:0005737//cytoplasm;GO:0044424//intracellular part;GO:0044444//cytoplasmic part	GO:0005488//binding	GO:0044700//single organism signaling;GO:0051716//cellular response to stimulus;GO:0035556//intracellular signal transduction;GO:0050789//regulation of biological process;GO:0050896//response to stimulus;GO:0007165//signal transduction;GO:0044699//single-organism process;GO:0050794//regulation of cellular process;GO:0065007//biological regulation;GO:0023052//signaling;GO:0007154//cell communicati…
XM_005908099	0	15.2567	0.001	0.75	9.55075	0.0469062	1	no	NBL1	PREDICTED: Bos mutus neuroblastoma 1, DAN family BMP antagonist (NBL1), transcript variant X1, mRNA	Environmental Information Processing	Signal transduction	ko04350//TGF-beta signaling pathway	K19558	GO:0044421//extracellular region part;GO:0005576//extracellular region	GO:0019955//cytokine binding;GO:0005488//binding;GO:0046983//protein dimerization activity;GO:0005515//protein binding	GO:0048583//regulation of response to stimulus;GO:0006357//regulation of transcription from RNA polymerase II promoter;GO:0016477//cell migration;GO:0006928//movement of cell or subcellular component;GO:0032501//multicellular organismal process;GO:0097529//myeloid leukocyte migration;GO:0048666//neuron development;GO:0044699//single-organism process;GO:0048731//system development;GO:0009953//dors…
XM_005909016	0	33.0633	0.001	0.75	9.55075	0.0196762	0.789811	no	FEM1A	PREDICTED: Bos mutus fem-1 homolog a (C. elegans) (FEM1A), transcript variant X2, mRNA	-	-	-	-	GO:0005622//intracellular;GO:0044424//intracellular part;GO:0044464//cell part;GO:0005623//cell	GO:0005102//receptor binding;GO:0005488//binding;GO:0005515//protein binding;GO:0031862//prostanoid receptor binding;GO:0001664//G-protein coupled receptor binding	GO:0060255//regulation of macromolecule metabolic process;GO:0051246//regulation of protein metabolic process;GO:0006950//response to stress;GO:0050789//regulation of biological process;GO:0080090//regulation of primary metabolic process;GO:0006952//defense response;GO:0006954//inflammatory response;GO:0031323//regulation of cellular metabolic process;GO:0032268//regulation of cellular protein me…
XP_005899697	0	30.4633	0.001	0.75	9.55075	0.0219445	0.819744	no	ATP9A	PREDICTED: probable phospholipid-transporting ATPase IIA [Bos mutus]	-	-	-	-	-	-	-
XP_005890173	0.263333	143.153	0.01	7.37333	9.52617	0.000249255	0.0855641	no	HSF2	heat shock factor protein 2 [Bos taurus]	-	-	-	-	GO:0043229//intracellular organelle;GO:0005622//intracellular;GO:0043231//intracellular membrane-bounded organelle;GO:0043226//organelle;GO:0043227//membrane-bounded organelle;GO:0044424//intracellular part;GO:0044464//cell part;GO:0005623//cell	GO:0043565//sequence-specific DNA binding;GO:0005515//protein binding;GO:0003676//nucleic acid binding;GO:0003677//DNA binding;GO:0044212//transcription regulatory region DNA binding;GO:0003700//transcription factor activity, sequence-specific DNA binding;GO:0097159//organic cyclic compound binding;GO:0001067//regulatory region nucleic acid binding;GO:0005488//binding;GO:0001012//RNA polymerase I…	GO:0044699//single-organism process;GO:0044249//cellular biosynthetic process;GO:1901362//organic cyclic compound biosynthetic process;GO:0043170//macromolecule metabolic process;GO:0044238//primary metabolic process;GO:0000003//reproduction;GO:0009987//cellular process;GO:0009058//biosynthetic process;GO:0006725//cellular aromatic compound metabolic process;GO:0009059//macromolecule biosynthetic…
XM_014479151	0	50.5567	0.001	0.726667	9.50515	0.01176	0.64761	no	LAMA3	PREDICTED: Bos mutus laminin, alpha 3 (LAMA3), transcript variant X3, mRNA	Cellular Processes;Environmental Information Processing	Signal transduction;Cellular commiunity;Signaling molecules and interaction	ko04151//PI3K-Akt signaling pathway;ko04510//Focal adhesion;ko04512//ECM-receptor interaction	K06240	GO:0043230//extracellular organelle;GO:0043226//organelle;GO:0032991//macromolecular complex;GO:0044421//extracellular region part;GO:0044420//extracellular matrix component;GO:1903561//extracellular vesicle;GO:0043227//membrane-bounded organelle;GO:0005576//extracellular region;GO:0005604//basement membrane;GO:0005578//proteinaceous extracellular matrix;GO:0031982//vesicle;GO:0043234//protein co…	-	GO:0044707//single-multicellular organism process;GO:0007369//gastrulation;GO:0006928//movement of cell or subcellular component;GO:0044767//single-organism developmental process;GO:0009888//tissue development;GO:0022610//biological adhesion;GO:0044763//single-organism cellular process;GO:0048856//anatomical structure development;GO:0001704//formation of primary germ layer;GO:0044699//single-orga…
XM_005907643	0	56.5533	0.001	0.723333	9.49852	2.23e-05	0.0193273	up	RPTOR	PREDICTED: Bos mutus regulatory associated protein of MTOR, complex 1 (RPTOR), transcript variant X2, mRNA	Organismal Systems;Environmental Information Processing	Signal transduction;Endocrine system	ko04151//PI3K-Akt signaling pathway;ko04910//Insulin signaling pathway;ko04152//AMPK signaling pathway;ko04150//mTOR signaling pathway	K07204	GO:0031974//membrane-enclosed lumen;GO:0043227//membrane-bounded organelle;GO:0043231//intracellular membrane-bounded organelle;GO:0044446//intracellular organelle part;GO:0044464//cell part;GO:0044428//nuclear part;GO:0042995//cell projection;GO:0005622//intracellular;GO:0097458//neuron part;GO:0043005//neuron projection;GO:0044422//organelle part;GO:0031981//nuclear lumen;GO:0005623//cell;GO:00…	GO:0008134//transcription factor binding;GO:0001067//regulatory region nucleic acid binding;GO:0001016//RNA polymerase III regulatory region DNA binding;GO:1901363//heterocyclic compound binding;GO:0019207//kinase regulator activity;GO:0098772//molecular function regulator;GO:0003677//DNA binding;GO:0019900//kinase binding;GO:0097159//organic cyclic compound binding;GO:0019887//protein kinase reg…	GO:0001935//endothelial cell proliferation;GO:0071840//cellular component organization or biogenesis;GO:0042327//positive regulation of phosphorylation;GO:0010562//positive regulation of phosphorus metabolic process;GO:0009266//response to temperature stimulus;GO:0019220//regulation of phosphate metabolic process;GO:0043085//positive regulation of catalytic activity;GO:0016043//cellular component…
XP_005894423	0	18.64	0.001	0.72	9.49185	0.0344324	0.961274	no	STT3A	dolichyl-diphosphooligosaccharide--protein glycosyltransferase subunit STT3A [Bos taurus]	Metabolism;Genetic Information Processing	Folding, sorting and degradation;Glycan biosynthesis and metabolism	ko04141//Protein processing in endoplasmic reticulum;ko00510//N-Glycan biosynthesis	K07151	-	-	-
XP_005894424	0	18.64	0.001	0.72	9.49185	0.0344317	0.961274	no	STT3A	dolichyl-diphosphooligosaccharide--protein glycosyltransferase subunit STT3A [Bos taurus]	Genetic Information Processing;Metabolism	Glycan biosynthesis and metabolism;Folding, sorting and degradation	ko04141//Protein processing in endoplasmic reticulum;ko00510//N-Glycan biosynthesis	K07151	-	-	-
Unigene049013	0	4	0.001	0.713333	9.47843	0.0346476	0.961274	no	-	-	-	-	-	-	-	-	-
XM_005898275	0	27.95	0.001	0.713333	9.47843	0.00115743	0.204679	no	RBFOX2	PREDICTED: Bos mutus RNA binding protein, fox-1 homolog (C. elegans) 2 (RBFOX2), transcript variant X2, mRNA	-	-	-	-	-	-	-
XP_005892119	0	13.59	0.001	0.713333	9.47843	0.0490258	1	no	CWF19L1	PREDICTED: CWF19-like protein 1 isoform X1 [Bos mutus]	-	-	-	-	-	-	-
XM_005907824	0	15.7267	0.001	0.71	9.47168	0.0466477	1	no	CCT8	PREDICTED: Bos mutus chaperonin containing TCP1, subunit 8 (theta) (CCT8), transcript variant X1, mRNA	-	-	-	-	GO:0005634//nucleus;GO:0043226//organelle;GO:0005815//microtubule organizing center;GO:0044428//nuclear part;GO:0044430//cytoskeletal part;GO:0005576//extracellular region;GO:1903561//extracellular vesicle;GO:0043229//intracellular organelle;GO:0044421//extracellular region part;GO:0044446//intracellular organelle part;GO:0031982//vesicle;GO:0043231//intracellular membrane-bounded organelle;GO:00…	GO:0005515//protein binding;GO:0001883//purine nucleoside binding;GO:0032549//ribonucleoside binding;GO:0097159//organic cyclic compound binding;GO:1901363//heterocyclic compound binding;GO:0032550//purine ribonucleoside binding;GO:0005488//binding;GO:0097367//carbohydrate derivative binding;GO:0036094//small molecule binding;GO:0001882//nucleoside binding	GO:0016043//cellular component organization;GO:0051234//establishment of localization;GO:0070271//protein complex biogenesis;GO:0009566//fertilization;GO:0006461//protein complex assembly;GO:0000003//reproduction;GO:0051179//localization;GO:0044763//single-organism cellular process;GO:0065003//macromolecular complex assembly;GO:0044703//multi-organism reproductive process;GO:0044702//single organ…
XM_005886679	0	21.4933	0.001	0.706667	9.46489	0.029785	0.912652	no	DTHD1	PREDICTED: Bos mutus death domain containing 1 (DTHD1), mRNA	-	-	-	-	-	-	GO:0007154//cell communication;GO:0044699//single-organism process;GO:0009987//cellular process;GO:0044763//single-organism cellular process
XM_005900854	0	54.0767	0.001	0.706667	9.46489	0.00960364	0.588866	no	DAAM1	PREDICTED: Bos mutus dishevelled associated activator of morphogenesis 1 (DAAM1), transcript variant X1, mRNA	Environmental Information Processing	Signal transduction	ko04310//Wnt signaling pathway	K04512	GO:0005856//cytoskeleton;GO:0042641//actomyosin;GO:0016020//membrane;GO:0044464//cell part;GO:0005737//cytoplasm;GO:0044424//intracellular part;GO:0043226//organelle;GO:0015629//actin cytoskeleton;GO:0043232//intracellular non-membrane-bounded organelle;GO:0044444//cytoplasmic part;GO:0044422//organelle part;GO:0043228//non-membrane-bounded organelle;GO:0044430//cytoskeletal part;GO:0005622//intr…	GO:0005488//binding;GO:0008092//cytoskeletal protein binding;GO:0031267//small GTPase binding;GO:0019899//enzyme binding;GO:0051020//GTPase binding;GO:0005515//protein binding;GO:0017016//Ras GTPase binding	GO:0006996//organelle organization;GO:0044763//single-organism cellular process;GO:0023052//signaling;GO:0051716//cellular response to stimulus;GO:0016043//cellular component organization;GO:0050794//regulation of cellular process;GO:0071840//cellular component organization or biogenesis;GO:0035567//non-canonical Wnt signaling pathway;GO:0044700//single organism signaling;GO:0016055//Wnt signalin…
XP_005908350	0	8.05667	0.001	0.696667	9.44432	0.0390222	0.99613	no	ZDHHC9	PREDICTED: palmitoyltransferase ZDHHC9 [Bos mutus]	-	-	-	-	GO:0005794//Golgi apparatus;GO:0005623//cell;GO:0044446//intracellular organelle part;GO:0031224//intrinsic component of membrane;GO:0044431//Golgi apparatus part;GO:0043234//protein complex;GO:1990234//transferase complex;GO:0098588//bounding membrane of organelle;GO:0005622//intracellular;GO:0044424//intracellular part;GO:0031090//organelle membrane;GO:0044422//organelle part;GO:0043229//intrac…	GO:0043169//cation binding;GO:0005488//binding;GO:0016746//transferase activity, transferring acyl groups;GO:0016747//transferase activity, transferring acyl groups other than amino-acyl groups;GO:0043167//ion binding;GO:0003824//catalytic activity;GO:0046872//metal ion binding;GO:0016409//palmitoyltransferase activity;GO:0046914//transition metal ion binding;GO:0016740//transferase activity	GO:0018193//peptidyl-amino acid modification;GO:0044238//primary metabolic process;GO:0019538//protein metabolic process;GO:0009987//cellular process;GO:0034645//cellular macromolecule biosynthetic process;GO:0042157//lipoprotein metabolic process;GO:0006464//cellular protein modification process;GO:0043170//macromolecule metabolic process;GO:0018231//peptidyl-S-diacylglycerol-L-cysteine biosynth…
XM_005890633	0	14.2333	0.001	0.69	9.43045	0.00251979	0.312194	no	LOC102266920	PREDICTED: Bos mutus cytochrome P450 26A1 (LOC102266920), mRNA	Metabolism	Metabolism of cofactors and vitamins	ko00830//Retinol metabolism	K07437	-	GO:0097159//organic cyclic compound binding;GO:0043169//cation binding;GO:0003824//catalytic activity;GO:0046906//tetrapyrrole binding;GO:0004497//monooxygenase activity;GO:0005488//binding;GO:0046872//metal ion binding;GO:0046914//transition metal ion binding;GO:0016491//oxidoreductase activity;GO:0043167//ion binding;GO:1901363//heterocyclic compound binding	GO:0044710//single-organism metabolic process;GO:0044248//cellular catabolic process;GO:0071704//organic substance metabolic process;GO:0016103//diterpenoid catabolic process;GO:0044238//primary metabolic process;GO:0006629//lipid metabolic process;GO:0006721//terpenoid metabolic process;GO:0016101//diterpenoid metabolic process;GO:0044699//single-organism process;GO:0008152//metabolic process;GO…
XM_014481645	0	18.44	0.001	0.69	9.43045	0.0349567	0.963495	no	RNF13	PREDICTED: Bos mutus ring finger protein 13 (RNF13), transcript variant X2, mRNA	-	-	-	-	GO:0042175//nuclear outer membrane-endoplasmic reticulum membrane network;GO:0016020//membrane;GO:0031090//organelle membrane;GO:0044464//cell part;GO:0019866//organelle inner membrane;GO:0012505//endomembrane system;GO:0031975//envelope;GO:0005770//late endosome;GO:0044425//membrane part;GO:0005737//cytoplasm;GO:0005622//intracellular;GO:0043229//intracellular organelle;GO:0044431//Golgi apparat…	GO:0004842//ubiquitin-protein transferase activity;GO:0046914//transition metal ion binding;GO:0003824//catalytic activity;GO:0046872//metal ion binding;GO:0005488//binding;GO:0043169//cation binding;GO:0019787//ubiquitin-like protein transferase activity;GO:0043167//ion binding;GO:0016740//transferase activity	GO:0043170//macromolecule metabolic process;GO:0044237//cellular metabolic process;GO:0032446//protein modification by small protein conjugation;GO:0043412//macromolecule modification;GO:0036211//protein modification process;GO:0070647//protein modification by small protein conjugation or removal;GO:0009987//cellular process;GO:0006464//cellular protein modification process;GO:0019538//protein me…
XP_014337283	0	10.92	0.001	0.683333	9.41645	0.00605304	0.475474	no	GGT6	PREDICTED: gamma-glutamyltransferase 6 [Bos mutus]	Metabolism	Metabolism of other amino acids	ko00480//Glutathione metabolism;ko00430//Taurine and hypotaurine metabolism;ko00460//Cyanoamino acid metabolism	K00681	GO:0031224//intrinsic component of membrane;GO:0016020//membrane;GO:0044425//membrane part	GO:0016740//transferase activity;GO:0008238//exopeptidase activity;GO:0008242//omega peptidase activity;GO:0003824//catalytic activity;GO:0016787//hydrolase activity;GO:0008233//peptidase activity;GO:0070011//peptidase activity, acting on L-amino acid peptides	GO:0034641//cellular nitrogen compound metabolic process;GO:0019538//protein metabolic process;GO:0043170//macromolecule metabolic process;GO:0043603//cellular amide metabolic process;GO:0044238//primary metabolic process;GO:0006518//peptide metabolic process;GO:0006807//nitrogen compound metabolic process;GO:0071704//organic substance metabolic process;GO:0006575//cellular modified amino acid me…
XM_005891358	0	59.73	0.001	0.68	9.40939	0.00179317	0.263322	no	RIC1	PREDICTED: Bos mutus RIC1 homolog, RAB6A GEF complex partner 1 (RIC1), transcript variant X2, mRNA	-	-	-	-	GO:0005623//cell;GO:0032991//macromolecular complex;GO:0043234//protein complex;GO:0032045//guanyl-nucleotide exchange factor complex;GO:0044424//intracellular part;GO:0005622//intracellular;GO:0044464//cell part	GO:0017016//Ras GTPase binding;GO:0005085//guanyl-nucleotide exchange factor activity;GO:0031267//small GTPase binding;GO:0005515//protein binding;GO:0005488//binding;GO:0098772//molecular function regulator;GO:0005088//Ras guanyl-nucleotide exchange factor activity;GO:0019899//enzyme binding;GO:0051020//GTPase binding	GO:0050790//regulation of catalytic activity;GO:0031329//regulation of cellular catabolic process;GO:0051179//localization;GO:0016192//vesicle-mediated transport;GO:0043087//regulation of GTPase activity;GO:0065009//regulation of molecular function;GO:0048523//negative regulation of cellular process;GO:0051336//regulation of hydrolase activity;GO:0050794//regulation of cellular process;GO:0019222…
XM_014478528	0	14.3333	0.001	0.68	9.40939	0.00312045	0.34439	no	DCAF17	PREDICTED: Bos mutus DDB1 and CUL4 associated factor 17 (DCAF17), transcript variant X2, mRNA	-	-	-	-	GO:0032991//macromolecular complex;GO:1990234//transferase complex;GO:0044464//cell part;GO:1902494//catalytic complex;GO:0044424//intracellular part;GO:0043234//protein complex;GO:0000151//ubiquitin ligase complex;GO:0031461//cullin-RING ubiquitin ligase complex;GO:0005623//cell;GO:0005622//intracellular	-	-
XM_014481159	0	17.6633	0.001	0.676667	9.4023	0.0103319	0.613016	no	TAF6L	PREDICTED: Bos mutus TAF6-like RNA polymerase II, p300/CBP-associated factor (PCAF)-associated factor, 65kDa (TAF6L), transcript variant X2, mRNA	Genetic Information Processing	Transcription	ko03022//Basal transcription factors	K03131	GO:0031982//vesicle;GO:0005576//extracellular region;GO:0044422//organelle part;GO:0000123//histone acetyltransferase complex;GO:0043234//protein complex;GO:0043226//organelle;GO:0043231//intracellular membrane-bounded organelle;GO:0043233//organelle lumen;GO:0031974//membrane-enclosed lumen;GO:0044451//nucleoplasm part;GO:0031981//nuclear lumen;GO:1902494//catalytic complex;GO:0043227//membrane-…	GO:0034212//peptide N-acetyltransferase activity;GO:0005515//protein binding;GO:0003824//catalytic activity;GO:0016746//transferase activity, transferring acyl groups;GO:0016407//acetyltransferase activity;GO:0016740//transferase activity;GO:0061733//peptide-lysine-N-acetyltransferase activity;GO:0016747//transferase activity, transferring acyl groups other than amino-acyl groups;GO:0008080//N-ac…	GO:0019219//regulation of nucleobase-containing compound metabolic process;GO:1903506//regulation of nucleic acid-templated transcription;GO:0065007//biological regulation;GO:0008152//metabolic process;GO:0051171//regulation of nitrogen compound metabolic process;GO:0016569//chromatin modification;GO:2000112//regulation of cellular macromolecule biosynthetic process;GO:0016570//histone modificati…
XP_005905920	0	14.04	0.001	0.676667	9.4023	0.0497915	1	no	SUOX	sulfite oxidase, mitochondrial [Bos taurus]	Metabolism	Energy metabolism	ko00920//Sulfur metabolism	K00387	-	GO:1901363//heterocyclic compound binding;GO:0043167//ion binding;GO:0097159//organic cyclic compound binding;GO:0005488//binding;GO:0003824//catalytic activity;GO:0046914//transition metal ion binding;GO:0043169//cation binding;GO:0046906//tetrapyrrole binding;GO:0046872//metal ion binding	GO:0006807//nitrogen compound metabolic process;GO:0006082//organic acid metabolic process;GO:0044699//single-organism process;GO:0044281//small molecule metabolic process;GO:0044710//single-organism metabolic process;GO:0043436//oxoacid metabolic process;GO:0009987//cellular process;GO:0042126//nitrate metabolic process;GO:0044763//single-organism cellular process;GO:0008152//metabolic process;G…
XP_005901933	0	26.1333	0.001	0.67	9.38802	0.0239634	0.841185	no	TMPRSS15	PREDICTED: enteropeptidase isoform X2 [Bos mutus]	-	-	-	-	GO:0031224//intrinsic component of membrane;GO:0044425//membrane part;GO:0016020//membrane	GO:0016787//hydrolase activity;GO:0070011//peptidase activity, acting on L-amino acid peptides;GO:0008233//peptidase activity;GO:0003824//catalytic activity;GO:0060089//molecular transducer activity;GO:0038024//cargo receptor activity;GO:0004872//receptor activity	GO:0008152//metabolic process;GO:0019538//protein metabolic process;GO:0016192//vesicle-mediated transport;GO:0006897//endocytosis;GO:0044238//primary metabolic process;GO:0051234//establishment of localization;GO:0071704//organic substance metabolic process;GO:0006810//transport;GO:0051179//localization;GO:0043170//macromolecule metabolic process
XP_005902533	0	14.6033	0.001	0.666667	9.38082	0.00264419	0.318417	no	RGS3	PREDICTED: regulator of G-protein signaling 3 isoform X4 [Bos taurus]	Organismal Systems	Development	ko04360//Axon guidance	K07524	-	-	-
XP_005905048	0	19.52	0.001	0.663333	9.37359	0.0354365	0.968901	no	ALDH16A1	PREDICTED: LOW QUALITY PROTEIN: aldehyde dehydrogenase family 16 member A1 [Bos mutus]	-	-	-	-	-	-	-
XM_005903531	0	24.0367	0.001	0.66	9.36632	0.00161025	0.2526	no	ACTN3	PREDICTED: Bos mutus actinin, alpha 3 (ACTN3), transcript variant X1, mRNA	Cellular Processes;Organismal Systems	Immune system;Cellular commiunity;Cell motility	ko04510//Focal adhesion;ko04810//Regulation of actin cytoskeleton;ko04530//Tight junction;ko04670//Leukocyte transendothelial migration;ko04520//Adherens junction	K05699	GO:0043229//intracellular organelle;GO:0031674//I band;GO:0043226//organelle;GO:0043232//intracellular non-membrane-bounded organelle;GO:0044464//cell part;GO:0005623//cell;GO:0044449//contractile fiber part;GO:0030016//myofibril;GO:0030017//sarcomere;GO:0098862//cluster of actin-based cell projections;GO:0044444//cytoplasmic part;GO:0005622//intracellular;GO:0043228//non-membrane-bounded organel…	GO:0003779//actin binding;GO:0043169//cation binding;GO:0005488//binding;GO:0046872//metal ion binding;GO:0043167//ion binding;GO:0005515//protein binding;GO:0008092//cytoskeletal protein binding	GO:0050879//multicellular organismal movement;GO:0006796//phosphate-containing compound metabolic process;GO:0051174//regulation of phosphorus metabolic process;GO:0044712//single-organism catabolic process;GO:0030501//positive regulation of bone mineralization;GO:0031325//positive regulation of cellular metabolic process;GO:0014877//response to muscle inactivity involved in regulation of muscle …
XP_005902202	0	10.06	0.001	0.653333	9.35168	0.0305428	0.920549	no	RARG	PREDICTED: retinoic acid receptor gamma isoform X2 [Bos taurus]	-	-	-	-	GO:0005623//cell;GO:0043228//non-membrane-bounded organelle;GO:0043232//intracellular non-membrane-bounded organelle;GO:0044428//nuclear part;GO:0031981//nuclear lumen;GO:0043233//organelle lumen;GO:0005634//nucleus;GO:0031974//membrane-enclosed lumen;GO:0070013//intracellular organelle lumen;GO:0044424//intracellular part;GO:0005694//chromosome;GO:0043226//organelle;GO:0044464//cell part;GO:0044…	GO:0044212//transcription regulatory region DNA binding;GO:0005515//protein binding;GO:0000976//transcription regulatory region sequence-specific DNA binding;GO:0043169//cation binding;GO:0004872//receptor activity;GO:0008134//transcription factor binding;GO:0000981//RNA polymerase II transcription factor activity, sequence-specific DNA binding;GO:0043167//ion binding;GO:0043565//sequence-specifi…	GO:0032526//response to retinoic acid;GO:0048534//hematopoietic or lymphoid organ development;GO:0002062//chondrocyte differentiation;GO:0035107//appendage morphogenesis;GO:0007399//nervous system development;GO:0002065//columnar/cuboidal epithelial cell differentiation;GO:0065007//biological regulation;GO:0042221//response to chemical;GO:0016070//RNA metabolic process;GO:0048598//embryonic morph…
XM_014483013	0	7.70667	0.001	0.646667	9.33688	0.0367462	0.974513	no	TEX30	PREDICTED: Bos mutus testis expressed 30 (TEX30), transcript variant X3, mRNA	-	-	-	-	-	GO:0003824//catalytic activity	-
XP_014333122	0	14.32	0.001	0.636667	9.31439	0.0171672	0.751902	no	PANK2	PREDICTED: LOW QUALITY PROTEIN: pantothenate kinase 2, mitochondrial [Bos mutus]	Metabolism	Metabolism of cofactors and vitamins	ko00770//Pantothenate and CoA biosynthesis	K09680	-	-	-
XP_014338632	0	12.81	0.001	0.636667	9.31439	0.0181537	0.765653	no	LGALS3BP	PREDICTED: galectin-3-binding protein isoform X1 [Bison bison bison]	-	-	-	-	GO:0031982//vesicle;GO:0005576//extracellular region;GO:0043230//extracellular organelle;GO:0043226//organelle;GO:0043227//membrane-bounded organelle;GO:0044421//extracellular region part;GO:0005615//extracellular space;GO:1903561//extracellular vesicle;GO:0031012//extracellular matrix	-	GO:0016192//vesicle-mediated transport;GO:0006897//endocytosis;GO:0022610//biological adhesion;GO:0051234//establishment of localization;GO:0006810//transport;GO:0051179//localization
XP_005902531	0	21.4833	0.001	0.633333	9.30682	0.032354	0.943573	no	RGS3	PREDICTED: regulator of G-protein signaling 3 isoform X2 [Bos mutus]	Organismal Systems	Development	ko04360//Axon guidance	K07524	-	-	-
XP_014332842	0.02	19.3467	0.00333333	2.10333	9.3015	0.0363025	0.974513	no	MTFR1	PREDICTED: mitochondrial fission regulator 1 isoform X3 [Bubalus bubalis]	-	-	-	-	-	-	-
XP_005886706	0	6.36333	0.001	0.623333	9.28386	0.0457451	1	no	PGAP2	PREDICTED: post-GPI attachment to proteins factor 2 isoform X3 [Bos mutus]	-	-	-	-	GO:0016020//membrane;GO:0044425//membrane part;GO:0031224//intrinsic component of membrane	-	GO:0035556//intracellular signal transduction;GO:0044763//single-organism cellular process;GO:0008219//cell death;GO:0033554//cellular response to stress;GO:0065007//biological regulation;GO:0050896//response to stimulus;GO:0009987//cellular process;GO:0051716//cellular response to stimulus;GO:0050789//regulation of biological process;GO:0023052//signaling;GO:0006974//cellular response to DNA dam…
XP_014339255	0	6.36333	0.001	0.623333	9.28386	0.0457603	1	no	PGAP2	PREDICTED: post-GPI attachment to proteins factor 2 isoform X3 [Bos mutus]	-	-	-	-	GO:0044425//membrane part;GO:0031224//intrinsic component of membrane;GO:0016020//membrane	-	GO:0012501//programmed cell death;GO:0050794//regulation of cellular process;GO:0065007//biological regulation;GO:0006950//response to stress;GO:0007165//signal transduction;GO:0050896//response to stimulus;GO:0007154//cell communication;GO:0006974//cellular response to DNA damage stimulus;GO:0097190//apoptotic signaling pathway;GO:0033554//cellular response to stress;GO:0044700//single organism …
XM_005902059	0	17.1233	0.001	0.62	9.27612	0.039736	1	no	KRAS	PREDICTED: Bos mutus Kirsten rat sarcoma viral oncogene homolog (KRAS), transcript variant X1, mRNA	Organismal Systems;Cellular Processes;Environmental Information Processing	Cellular commiunity;Excretory system;Endocrine system;Signal transduction;Nervous system;Development;Cell motility;Immune system	ko04151//PI3K-Akt signaling pathway;ko04010//MAPK signaling pathway;ko04014//Ras signaling pathway;ko04810//Regulation of actin cytoskeleton;ko04015//Rap1 signaling pathway;ko04062//Chemokine signaling pathway;ko04921//Oxytocin signaling pathway;ko04360//Axon guidance;ko04550//Signaling pathways regulating pluripotency of stem cells;ko04910//Insulin signaling pathway;ko04530//Tight junction;ko040…	K07827	GO:0005622//intracellular;GO:0071944//cell periphery;GO:0044425//membrane part;GO:0044464//cell part;GO:0030054//cell junction;GO:0016020//membrane;GO:0098552//side of membrane;GO:0098562//cytoplasmic side of membrane;GO:0005623//cell;GO:0005886//plasma membrane;GO:0005924//cell-substrate adherens junction;GO:0030055//cell-substrate junction;GO:0044424//intracellular part;GO:0009898//cytoplasmic …	GO:0032550//purine ribonucleoside binding;GO:0032549//ribonucleoside binding;GO:0097367//carbohydrate derivative binding;GO:1901363//heterocyclic compound binding;GO:0097159//organic cyclic compound binding;GO:0005515//protein binding;GO:0001883//purine nucleoside binding;GO:0003824//catalytic activity;GO:0016817//hydrolase activity, acting on acid anhydrides;GO:0036094//small molecule binding;GO…	GO:0044708//single-organism behavior;GO:0051716//cellular response to stimulus;GO:0048856//anatomical structure development;GO:0048708//astrocyte differentiation;GO:0048167//regulation of synaptic plasticity;GO:0010646//regulation of cell communication;GO:0019220//regulation of phosphate metabolic process;GO:0048468//cell development;GO:0031323//regulation of cellular metabolic process;GO:0044767…
XP_005909868	0	18.5267	0.001	0.616667	9.26835	0.00964629	0.590221	no	AP1G2	PREDICTED: AP-1 complex subunit gamma-like 2 isoform X1 [Bos mutus]	Cellular Processes	Transport and catabolism	ko04142//Lysosome	K12391	GO:0031982//vesicle;GO:0016023//cytoplasmic, membrane-bounded vesicle;GO:0005737//cytoplasm;GO:0031988//membrane-bounded vesicle;GO:0044424//intracellular part;GO:0016020//membrane;GO:0043229//intracellular organelle;GO:0005622//intracellular;GO:0048475//coated membrane;GO:0031410//cytoplasmic vesicle;GO:0043226//organelle;GO:0043231//intracellular membrane-bounded organelle;GO:0097708//intracell…	GO:0005215//transporter activity;GO:0022892//substrate-specific transporter activity	GO:0051234//establishment of localization;GO:0006810//transport;GO:0071702//organic substance transport;GO:0051179//localization;GO:0008104//protein localization;GO:0015031//protein transport;GO:0033036//macromolecule localization;GO:0045184//establishment of protein localization
XM_005910607	0	16.9067	0.001	0.61	9.25267	0.00166537	0.256675	no	SLC12A8	PREDICTED: Bos mutus solute carrier family 12, member 8 (SLC12A8), partial mRNA	-	-	-	-	-	-	GO:0051179//localization;GO:0044699//single-organism process;GO:0009987//cellular process;GO:0051234//establishment of localization;GO:0044763//single-organism cellular process
XM_014476910	0	19.79	0.001	0.61	9.25267	0.0354304	0.968901	no	FPGT	PREDICTED: Bos mutus fucose-1-phosphate guanylyltransferase (FPGT), transcript variant X2, mRNA	Metabolism	Carbohydrate metabolism	ko00520//Amino sugar and nucleotide sugar metabolism;ko00051//Fructose and mannose metabolism	K00976	GO:0005737//cytoplasm;GO:0044424//intracellular part;GO:0005623//cell;GO:0005622//intracellular;GO:0044444//cytoplasmic part;GO:0044464//cell part	GO:0097367//carbohydrate derivative binding;GO:0016772//transferase activity, transferring phosphorus-containing groups;GO:0001883//purine nucleoside binding;GO:1901363//heterocyclic compound binding;GO:0036094//small molecule binding;GO:0097159//organic cyclic compound binding;GO:0016740//transferase activity;GO:0016779//nucleotidyltransferase activity;GO:0001882//nucleoside binding;GO:0003824//…	GO:0071704//organic substance metabolic process;GO:0005996//monosaccharide metabolic process;GO:0044723//single-organism carbohydrate metabolic process;GO:0005975//carbohydrate metabolic process;GO:0044238//primary metabolic process;GO:0008152//metabolic process;GO:0044710//single-organism metabolic process;GO:0044699//single-organism process;GO:0019318//hexose metabolic process;GO:0044281//small…
XP_005888759	0	10.18	0.001	0.61	9.25267	0.0116593	0.647446	no	CHST3	PREDICTED: carbohydrate sulfotransferase 3 [Bos mutus]	Metabolism	Glycan biosynthesis and metabolism	ko00532//Glycosaminoglycan biosynthesis - chondroitin sulfate / dermatan sulfate	K01020	-	-	-
XP_005910312	0	18.1633	0.001	0.61	9.25267	0.0098336	0.595735	no	LOC102275867	PREDICTED: U3 small nucleolar RNA-associated protein 14 homolog A-like [Bos mutus]	Genetic Information Processing	Translation	ko03008//Ribosome biogenesis in eukaryotes	K14567	GO:0044464//cell part;GO:0043227//membrane-bounded organelle;GO:0043229//intracellular organelle;GO:0032991//macromolecular complex;GO:0030684//preribosome;GO:0043226//organelle;GO:0005622//intracellular;GO:0030529//intracellular ribonucleoprotein complex;GO:0005623//cell;GO:0043231//intracellular membrane-bounded organelle;GO:1990904//ribonucleoprotein complex;GO:0044424//intracellular part	-	GO:0071840//cellular component organization or biogenesis;GO:0044085//cellular component biogenesis;GO:0022613//ribonucleoprotein complex biogenesis
XM_014480767	0	7.32	0.001	0.603333	9.23681	0.0408916	1	no	ARHGDIB	PREDICTED: Bos mutus Rho GDP dissociation inhibitor (GDI) beta (ARHGDIB), transcript variant X5, mRNA	Organismal Systems	Excretory system;Nervous system	ko04722//Neurotrophin signaling pathway;ko04962//Vasopressin-regulated water reabsorption	K12462	GO:0044421//extracellular region part;GO:0005737//cytoplasm;GO:0005622//intracellular;GO:0005623//cell;GO:1903561//extracellular vesicle;GO:0043227//membrane-bounded organelle;GO:0044444//cytoplasmic part;GO:0005576//extracellular region;GO:0043226//organelle;GO:0044424//intracellular part;GO:0044464//cell part;GO:0043230//extracellular organelle;GO:0031982//vesicle	GO:0030234//enzyme regulator activity;GO:0031267//small GTPase binding;GO:0098772//molecular function regulator;GO:0005488//binding;GO:0060589//nucleoside-triphosphatase regulator activity;GO:0019899//enzyme binding;GO:0051020//GTPase binding;GO:0017048//Rho GTPase binding;GO:0008047//enzyme activator activity;GO:0030695//GTPase regulator activity;GO:0017016//Ras GTPase binding;GO:0005092//GDP-di…	GO:1902589//single-organism organelle organization;GO:0007154//cell communication;GO:0040012//regulation of locomotion;GO:0050794//regulation of cellular process;GO:0016043//cellular component organization;GO:0023052//signaling;GO:0006996//organelle organization;GO:0043087//regulation of GTPase activity;GO:0051271//negative regulation of cellular component movement;GO:0030336//negative regulation…
XM_014480962	0	16.86	0.001	0.593333	9.2127	0.0162308	0.739306	no	E4F1	PREDICTED: Bos mutus E4F transcription factor 1 (E4F1), transcript variant X2, mRNA	-	-	-	-	GO:0043228//non-membrane-bounded organelle;GO:0031974//membrane-enclosed lumen;GO:0043226//organelle;GO:0005856//cytoskeleton;GO:0031981//nuclear lumen;GO:0044428//nuclear part;GO:0005623//cell;GO:0044446//intracellular organelle part;GO:0015630//microtubule cytoskeleton;GO:0070013//intracellular organelle lumen;GO:0005634//nucleus;GO:0043229//intracellular organelle;GO:0044422//organelle part;GO…	GO:0000988//transcription factor activity, protein binding;GO:0000989//transcription factor activity, transcription factor binding;GO:0003677//DNA binding;GO:1901363//heterocyclic compound binding;GO:0003712//transcription cofactor activity;GO:0043167//ion binding;GO:0003690//double-stranded DNA binding;GO:0043169//cation binding;GO:0044212//transcription regulatory region DNA binding;GO:0003700/…	GO:0019438//aromatic compound biosynthetic process;GO:0006464//cellular protein modification process;GO:0032774//RNA biosynthetic process;GO:0045786//negative regulation of cell cycle;GO:0034641//cellular nitrogen compound metabolic process;GO:1901362//organic cyclic compound biosynthetic process;GO:0044403//symbiosis, encompassing mutualism through parasitism;GO:0009059//macromolecule biosynthet…
XP_014332332	0	17.88	0.001	0.593333	9.2127	0.0357728	0.97356	no	SORT1	PREDICTED: sortilin [Bos mutus]	Cellular Processes;Organismal Systems	Transport and catabolism;Nervous system	ko04142//Lysosome;ko04722//Neurotrophin signaling pathway	K12388	GO:0031224//intrinsic component of membrane;GO:0043227//membrane-bounded organelle;GO:0030135//coated vesicle;GO:0005623//cell;GO:0043231//intracellular membrane-bounded organelle;GO:0044444//cytoplasmic part;GO:0005622//intracellular;GO:0016023//cytoplasmic, membrane-bounded vesicle;GO:0097708//intracellular vesicle;GO:0031988//membrane-bounded vesicle;GO:0031982//vesicle;GO:0005794//Golgi appar…	GO:0004871//signal transducer activity;GO:0004872//receptor activity;GO:0004888//transmembrane signaling receptor activity;GO:0060089//molecular transducer activity;GO:0043121//neurotrophin binding;GO:0005488//binding;GO:0005030//neurotrophin receptor activity;GO:0099600//transmembrane receptor activity;GO:0038023//signaling receptor activity;GO:0005515//protein binding;GO:0019838//growth factor …	GO:1902578//single-organism localization;GO:0009987//cellular process;GO:0051641//cellular localization;GO:0023052//signaling;GO:0007166//cell surface receptor signaling pathway;GO:0032594//protein transport within lipid bilayer;GO:0009725//response to hormone;GO:0044763//single-organism cellular process;GO:0051336//regulation of hydrolase activity;GO:0045444//fat cell differentiation;GO:0097191/…
XP_005901546	0	28.79	0.001	0.586667	9.1964	0.00445985	0.412185	no	HDLBP	PREDICTED: vigilin isoform X2 [Bos mutus]	-	-	-	-	GO:0043227//membrane-bounded organelle;GO:0034358//plasma lipoprotein particle;GO:0043229//intracellular organelle;GO:0044424//intracellular part;GO:0043226//organelle;GO:0005623//cell;GO:0044464//cell part;GO:0005615//extracellular space;GO:0043231//intracellular membrane-bounded organelle;GO:0016020//membrane;GO:0044421//extracellular region part;GO:0032994//protein-lipid complex;GO:0032991//ma…	GO:1901363//heterocyclic compound binding;GO:0097159//organic cyclic compound binding;GO:0003676//nucleic acid binding;GO:0005488//binding;GO:0003723//RNA binding	GO:0051179//localization;GO:0044710//single-organism metabolic process;GO:0051234//establishment of localization;GO:0016125//sterol metabolic process;GO:1901360//organic cyclic compound metabolic process;GO:0033036//macromolecule localization;GO:0010876//lipid localization;GO:1901615//organic hydroxy compound metabolic process;GO:0044699//single-organism process;GO:0044238//primary metabolic proc…
XP_014333061	0	25.9967	0.001	0.586667	9.1964	0.026181	0.867223	no	LLGL1	PREDICTED: lethal(2) giant larvae protein homolog 1 [Bos mutus]	Environmental Information Processing;Cellular Processes	Signal transduction;Cellular commiunity	ko04390//Hippo signaling pathway;ko04530//Tight junction	K06094	-	-	-
XM_014482426	0	15.6767	0.001	0.583333	9.18818	0.0466323	1	no	SNW1	PREDICTED: Bos mutus SNW domain containing 1 (SNW1), transcript variant X1, mRNA	Environmental Information Processing;Genetic Information Processing	Transcription;Signal transduction	ko03040//Spliceosome;ko04330//Notch signaling pathway	K06063	GO:0043231//intracellular membrane-bounded organelle;GO:0044424//intracellular part;GO:0070013//intracellular organelle lumen;GO:0043233//organelle lumen;GO:0043226//organelle;GO:0034399//nuclear periphery;GO:0043234//protein complex;GO:0008023//transcription elongation factor complex;GO:0043229//intracellular organelle;GO:0005623//cell;GO:0005667//transcription factor complex;GO:0044422//organel…	GO:0000988//transcription factor activity, protein binding;GO:0003676//nucleic acid binding;GO:0005488//binding;GO:0003712//transcription cofactor activity;GO:0003723//RNA binding;GO:0000989//transcription factor activity, transcription factor binding;GO:0051427//hormone receptor binding;GO:0097159//organic cyclic compound binding;GO:1901363//heterocyclic compound binding;GO:0005515//protein bind…	GO:0097659//nucleic acid-templated transcription;GO:0035556//intracellular signal transduction;GO:0010720//positive regulation of cell development;GO:0048583//regulation of response to stimulus;GO:0051130//positive regulation of cellular component organization;GO:0052472//modulation by host of symbiont transcription;GO:0014706//striated muscle tissue development;GO:0032501//multicellular organism…
XM_014479692	0	7.06	0.001	0.58	9.17991	0.01732	0.7536	no	PUDP	PREDICTED: Bos mutus pseudouridine 5'-phosphatase (PUDP), mRNA	-	-	-	-	-	GO:0003824//catalytic activity	-
XP_005889910	0	41.1167	0.001	0.58	9.17991	0.00438133	0.40778	no	KIAA1671	KIAA1671 protein [Homo sapiens]	-	-	-	-	-	-	-
XM_014479980	0	8.79	0.001	0.573333	9.16323	0.030063	0.916622	no	SMYD5	PREDICTED: Bos mutus SMYD family member 5 (SMYD5), transcript variant X1, mRNA	-	-	-	-	-	-	-
XP_005901368	0	30.89	0.001	0.573333	9.16323	0.00678736	0.49974	no	PTCHD2	PREDICTED: patched domain-containing protein 2 [Bos mutus]	-	-	-	-	GO:0016020//membrane;GO:0044425//membrane part;GO:0031224//intrinsic component of membrane	-	-
XM_005904271	0	11.2767	0.001	0.563333	9.13785	0.022212	0.823069	no	ABI2	PREDICTED: Bos mutus abl-interactor 2 (ABI2), transcript variant X7, mRNA	Cellular Processes	Cell motility	ko04810//Regulation of actin cytoskeleton	K05751	GO:0044464//cell part;GO:0005623//cell;GO:0005622//intracellular;GO:0044424//intracellular part	-	GO:0044699//single-organism process;GO:0030036//actin cytoskeleton organization;GO:0071840//cellular component organization or biogenesis;GO:0007010//cytoskeleton organization;GO:1902589//single-organism organelle organization;GO:0009987//cellular process;GO:0016043//cellular component organization;GO:0044763//single-organism cellular process;GO:0030029//actin filament-based process;GO:0006996//o…
XP_005909363	0	10.1933	0.001	0.563333	9.13785	0.0281733	0.890097	no	SORBS2	PREDICTED: sorbin and SH3 domain-containing protein 2 isoform X6 [Bos mutus]	-	-	-	-	-	-	-
XM_005896642	0	14.1133	0.001	0.56	9.12928	0.017775	0.758415	no	SCFD1	PREDICTED: Bos mutus sec1 family domain containing 1 (SCFD1), transcript variant X3, mRNA	-	-	-	-	GO:0044464//cell part;GO:0043227//membrane-bounded organelle;GO:0044424//intracellular part;GO:0043229//intracellular organelle;GO:0005623//cell;GO:0043231//intracellular membrane-bounded organelle;GO:0005622//intracellular;GO:0043226//organelle	-	GO:0051234//establishment of localization;GO:0044699//single-organism process;GO:0070925//organelle assembly;GO:0006887//exocytosis;GO:0006996//organelle organization;GO:0016043//cellular component organization;GO:0009987//cellular process;GO:0044085//cellular component biogenesis;GO:0042221//response to chemical;GO:0046903//secretion;GO:0033036//macromolecule localization;GO:0008104//protein loc…
XM_005893103	0	21.38	0.001	0.55	9.10329	0.00794165	0.535504	no	TRMT1L	PREDICTED: Bos mutus tRNA methyltransferase 1-like (TRMT1L), transcript variant X2, mRNA	-	-	-	-	-	-	-
XM_005903028	0	31.07	0.001	0.55	9.10329	0.000287727	0.0916415	no	UBAP2	PREDICTED: Bos mutus ubiquitin associated protein 2 (UBAP2), transcript variant X2, mRNA	-	-	-	-	-	-	-
XM_005894913	0	10.0533	0.001	0.543333	9.08569	0.0253296	0.855623	no	CTSS	PREDICTED: Bos mutus cathepsin S (CTSS), transcript variant X2, mRNA	Cellular Processes;Organismal Systems	Transport and catabolism;Immune system	ko04145//Phagosome;ko04142//Lysosome;ko04612//Antigen processing and presentation	K01368	-	-	-
XP_005904791	0	14.04	0.001	0.543333	9.08569	0.0147651	0.707027	no	OAS2	PREDICTED: 2'-5'-oligoadenylate synthase 2 isoform X2 [Bos mutus]	-	-	-	-	GO:0043226//organelle;GO:0044464//cell part;GO:0043227//membrane-bounded organelle;GO:0005737//cytoplasm;GO:0044444//cytoplasmic part;GO:0043231//intracellular membrane-bounded organelle;GO:0043229//intracellular organelle;GO:0044424//intracellular part;GO:0005622//intracellular;GO:0005623//cell	GO:0016779//nucleotidyltransferase activity;GO:1901363//heterocyclic compound binding;GO:0003824//catalytic activity;GO:0046914//transition metal ion binding;GO:0003676//nucleic acid binding;GO:0016772//transferase activity, transferring phosphorus-containing groups;GO:0003723//RNA binding;GO:0001883//purine nucleoside binding;GO:0032549//ribonucleoside binding;GO:0016740//transferase activity;GO…	GO:0071704//organic substance metabolic process;GO:0044260//cellular macromolecule metabolic process;GO:0019637//organophosphate metabolic process;GO:0034641//cellular nitrogen compound metabolic process;GO:0044249//cellular biosynthetic process;GO:0009987//cellular process;GO:0008152//metabolic process;GO:0006952//defense response;GO:0009607//response to biotic stimulus;GO:0006950//response to s…
XM_005889867	0	29.8767	0.001	0.54	9.07682	0.022263	0.823069	no	CD99L2	PREDICTED: Bos mutus CD99 molecule-like 2 (CD99L2), transcript variant X4, mRNA	-	-	-	-	GO:0070161//anchoring junction;GO:0044425//membrane part;GO:0031224//intrinsic component of membrane;GO:0030055//cell-substrate junction;GO:0005912//adherens junction;GO:0030054//cell junction;GO:0016020//membrane;GO:0005924//cell-substrate adherens junction	-	GO:0022610//biological adhesion
XP_005907039	0	4.29333	0.001	0.54	9.07682	0.0465099	1	no	ANKRD33	PREDICTED: ankyrin repeat domain-containing protein 33 [Bos mutus]	-	-	-	-	-	-	-
XM_014479470	0	7.14667	0.001	0.533333	9.05889	0.0417505	1	no	CIAPIN1	PREDICTED: Bos mutus cytokine induced apoptosis inhibitor 1 (CIAPIN1), transcript variant X1, mRNA	-	-	-	-	-	-	-
XP_014334644	0.00666667	9.58	0.001	0.533333	9.05889	0.0471136	1	no	LOC102265612	PREDICTED: cytoplasmic polyadenylation element-binding protein 2 isoform X2 [Bos taurus]	Organismal Systems;Cellular Processes	Endocrine system;Cell growth and death;Development	ko04114//Oocyte meiosis;ko04914//Progesterone-mediated oocyte maturation;ko04320//Dorso-ventral axis formation	K02602	GO:0005622//intracellular;GO:0043226//organelle;GO:0044424//intracellular part;GO:0043231//intracellular membrane-bounded organelle;GO:0005623//cell;GO:0043229//intracellular organelle;GO:0044464//cell part;GO:0043227//membrane-bounded organelle	GO:0097159//organic cyclic compound binding;GO:0003676//nucleic acid binding;GO:1901363//heterocyclic compound binding;GO:0005488//binding;GO:0044822//poly(A) RNA binding;GO:0003723//RNA binding	GO:0019222//regulation of metabolic process;GO:0009628//response to abiotic stimulus;GO:0006417//regulation of translation;GO:0010556//regulation of macromolecule biosynthetic process;GO:0009889//regulation of biosynthetic process;GO:0009719//response to endogenous stimulus;GO:1901700//response to oxygen-containing compound;GO:0080090//regulation of primary metabolic process;GO:0032269//negative …
XM_005895722	0	12.7233	0.001	0.53	9.04985	0.0190565	0.781257	no	PREB	PREDICTED: Bos mutus prolactin regulatory element binding (PREB), transcript variant X2, mRNA	Genetic Information Processing	Folding, sorting and degradation	ko04141//Protein processing in endoplasmic reticulum	K14003	GO:0044425//membrane part;GO:0031224//intrinsic component of membrane;GO:0016020//membrane	-	-
XP_005908073	0	8.50667	0.001	0.53	9.04985	0.0330375	0.946889	no	MFSD11	PREDICTED: UNC93-like protein MFSD11 isoform X1 [Bos taurus]	-	-	-	-	GO:0044425//membrane part;GO:0031224//intrinsic component of membrane;GO:0016020//membrane	-	-
XP_005908074	0	8.50667	0.001	0.53	9.04985	0.0330466	0.946889	no	MFSD11	PREDICTED: UNC93-like protein MFSD11 isoform X1 [Bos taurus]	-	-	-	-	GO:0031224//intrinsic component of membrane;GO:0016020//membrane;GO:0044425//membrane part	-	-
XP_014337768	0	8.50667	0.001	0.53	9.04985	0.0330426	0.946889	no	MFSD11	PREDICTED: UNC93-like protein MFSD11 isoform X1 [Bos taurus]	-	-	-	-	GO:0016020//membrane;GO:0031224//intrinsic component of membrane;GO:0044425//membrane part	-	-
XM_005901671	0	15.4733	0.001	0.526667	9.04075	0.0125997	0.66542	no	OS9	PREDICTED: Bos mutus osteosarcoma amplified 9, endoplasmic reticulum lectin (OS9), transcript variant X5, mRNA	Genetic Information Processing	Folding, sorting and degradation	ko04141//Protein processing in endoplasmic reticulum	K10088	GO:0005783//endoplasmic reticulum;GO:0005737//cytoplasm;GO:0044446//intracellular organelle part;GO:0044444//cytoplasmic part;GO:0044422//organelle part;GO:0043231//intracellular membrane-bounded organelle;GO:0012505//endomembrane system;GO:0043227//membrane-bounded organelle;GO:0043226//organelle;GO:0005622//intracellular;GO:0043229//intracellular organelle;GO:0044464//cell part;GO:0044424//intr…	GO:0005515//protein binding;GO:0005488//binding	GO:0072595//maintenance of protein localization in organelle;GO:0051179//localization;GO:0034976//response to endoplasmic reticulum stress;GO:0051641//cellular localization;GO:0036211//protein modification process;GO:0009056//catabolic process;GO:1902578//single-organism localization;GO:0006950//response to stress;GO:0070727//cellular macromolecule localization;GO:0051716//cellular response to st…
XP_005892620	0	17.0633	0.001	0.526667	9.04075	0.0113678	0.639319	no	SH3RF1	PREDICTED: E3 ubiquitin-protein ligase SH3RF1 [Bos mutus]	-	-	-	-	GO:0005737//cytoplasm;GO:0044464//cell part;GO:0044424//intracellular part;GO:0044444//cytoplasmic part;GO:0031252//cell leading edge;GO:0005623//cell;GO:0005622//intracellular	GO:0046914//transition metal ion binding;GO:0005488//binding;GO:0003824//catalytic activity;GO:0043167//ion binding;GO:0043169//cation binding;GO:0046872//metal ion binding	GO:0031098//stress-activated protein kinase signaling cascade;GO:0097191//extrinsic apoptotic signaling pathway;GO:0051403//stress-activated MAPK cascade;GO:0050794//regulation of cellular process;GO:0043067//regulation of programmed cell death;GO:0065007//biological regulation;GO:0043170//macromolecule metabolic process;GO:0043412//macromolecule modification;GO:0012501//programmed cell death;GO:…
XP_005895499	0	15.11	0.001	0.526667	9.04075	0.048229	1	no	CDH24	PREDICTED: cadherin-24 [Bos mutus]	-	-	-	-	GO:0044425//membrane part;GO:0016020//membrane;GO:0031224//intrinsic component of membrane;GO:0030054//cell junction	GO:0005515//protein binding;GO:0005488//binding	GO:0007155//cell adhesion;GO:0044699//single-organism process;GO:0098602//single organism cell adhesion;GO:0098742//cell-cell adhesion via plasma-membrane adhesion molecules;GO:0098609//cell-cell adhesion;GO:0022610//biological adhesion
XP_005903403	0	19.55	0.001	0.526667	9.04075	0.0326636	0.945441	no	EFTUD2	PREDICTED: 116 kDa U5 small nuclear ribonucleoprotein component [Ovis aries]	Genetic Information Processing	Transcription	ko03040//Spliceosome	K12852	-	-	-
XM_014476581	0	8.55333	0.001	0.52	9.02237	0.037165	0.977613	no	POLR2E	PREDICTED: Bos mutus polymerase (RNA) II (DNA directed) polypeptide E, 25kDa (POLR2E), transcript variant X1, mRNA	Genetic Information Processing;Organismal Systems;Metabolism	Transcription;Immune system;Nucleotide metabolism	ko00230//Purine metabolism;ko00240//Pyrimidine metabolism;ko04623//Cytosolic DNA-sensing pathway;ko03020//RNA polymerase	K03013	-	-	-
XM_005902398	0	11.8233	0.001	0.516667	9.01309	0.021117	0.803977	no	FMO1	PREDICTED: Bos mutus flavin containing monooxygenase 1 (FMO1), transcript variant X2, mRNA	Metabolism	Xenobiotics biodegradation and metabolism	ko00982//Drug metabolism - cytochrome P450	K00485	-	-	-
XP_005889304	0	13.25	0.001	0.516667	9.01309	0.0161928	0.739065	no	DTNA	PREDICTED: dystrobrevin alpha isoform X6 [Bos mutus]	-	-	-	-	GO:0032991//macromolecular complex	GO:0046914//transition metal ion binding;GO:0046872//metal ion binding;GO:0043167//ion binding;GO:0005488//binding;GO:0043169//cation binding	-
XP_005894520	0	9.13	0.001	0.513333	9.00375	0.0285118	0.893995	no	IKZF2	PREDICTED: zinc finger protein Helios isoform X5 [Bos taurus]	-	-	-	-	-	-	-
XP_005891033	0	9.27667	0.001	0.506667	8.98489	0.0287984	0.90044	no	MITF	PREDICTED: microphthalmia-associated transcription factor isoform X5 [Ovis aries]	Organismal Systems	Endocrine system;Development	ko04380//Osteoclast differentiation;ko04916//Melanogenesis	K09455	-	-	-
XP_005902804	0	21.5233	0.001	0.503333	8.97537	0.0292451	0.90612	no	TSC1	PREDICTED: hamartin isoform X2 [Bos mutus]	Environmental Information Processing;Organismal Systems	Signal transduction;Endocrine system	ko04151//PI3K-Akt signaling pathway;ko04910//Insulin signaling pathway;ko04152//AMPK signaling pathway;ko04150//mTOR signaling pathway	K07206	-	-	-
XM_014481378	0	14.5733	0.001	0.5	8.96578	0.0494521	1	no	LYPLAL1	PREDICTED: Bos mutus lysophospholipase-like 1 (LYPLAL1), transcript variant X3, mRNA	-	-	-	-	-	-	-
XM_005906620	0	22.7667	0.001	0.496667	8.95613	0.0279395	0.886665	no	LARS	PREDICTED: Bos mutus leucyl-tRNA synthetase (LARS), transcript variant X4, mRNA	Genetic Information Processing	Translation	ko00970//Aminoacyl-tRNA biosynthesis	K01869	GO:0005623//cell;GO:0044464//cell part;GO:0043229//intracellular organelle;GO:0005622//intracellular;GO:0043231//intracellular membrane-bounded organelle;GO:0044424//intracellular part;GO:0043226//organelle;GO:0043227//membrane-bounded organelle	GO:0016787//hydrolase activity;GO:0001883//purine nucleoside binding;GO:0097159//organic cyclic compound binding;GO:0001882//nucleoside binding;GO:0016874//ligase activity;GO:0004812//aminoacyl-tRNA ligase activity;GO:0016875//ligase activity, forming carbon-oxygen bonds;GO:0097367//carbohydrate derivative binding;GO:0036094//small molecule binding;GO:0016788//hydrolase activity, acting on ester …	GO:0050794//regulation of cellular process;GO:0044710//single-organism metabolic process;GO:0044238//primary metabolic process;GO:0065007//biological regulation;GO:0032268//regulation of cellular protein metabolic process;GO:0019222//regulation of metabolic process;GO:0034660//ncRNA metabolic process;GO:0044699//single-organism process;GO:0050789//regulation of biological process;GO:0043604//amid…
XM_005904208	0	18.08	0.001	0.493333	8.94642	0.0117574	0.64761	no	VWA7	PREDICTED: Bos mutus von Willebrand factor A domain containing 7 (VWA7), mRNA	-	-	-	-	-	-	-
XM_014482824	0	7.15	0.001	0.49	8.93664	0.0475437	1	no	MGLL	PREDICTED: Bos mutus monoglyceride lipase (MGLL), transcript variant X2, mRNA	Organismal Systems;Metabolism	Lipid metabolism;Endocrine system;Nervous system	ko04723//Retrograde endocannabinoid signaling;ko00561//Glycerolipid metabolism;ko04923//Regulation of lipolysis in adipocyte	K01054	-	-	-
XM_005895774	0	14.8033	0.001	0.486667	8.92679	0.0162031	0.739065	no	WLS	PREDICTED: Bos mutus wntless Wnt ligand secretion mediator (WLS), transcript variant X2, mRNA	-	-	-	-	GO:0071944//cell periphery;GO:0044464//cell part;GO:0005622//intracellular;GO:0043005//neuron projection;GO:0043227//membrane-bounded organelle;GO:0043231//intracellular membrane-bounded organelle;GO:0005737//cytoplasm;GO:0044424//intracellular part;GO:0044444//cytoplasmic part;GO:0097708//intracellular vesicle;GO:0031252//cell leading edge;GO:0012505//endomembrane system;GO:0005768//endosome;GO:…	GO:0031628//opioid receptor binding;GO:0005488//binding;GO:0005515//protein binding;GO:0001664//G-protein coupled receptor binding;GO:0005102//receptor binding	GO:0032501//multicellular organismal process;GO:0023052//signaling;GO:0007389//pattern specification process;GO:0050896//response to stimulus;GO:0071702//organic substance transport;GO:0044707//single-multicellular organism process;GO:0006810//transport;GO:0048583//regulation of response to stimulus;GO:0007267//cell-cell signaling;GO:0015031//protein transport;GO:0051716//cellular response to sti…
XP_014335640	0	19.03	0.001	0.483333	8.91687	0.0100119	0.602001	no	FAM129B	PREDICTED: niban-like protein 1 [Bos mutus]	-	-	-	-	GO:0005856//cytoskeleton;GO:0043233//organelle lumen;GO:0043226//organelle;GO:0005622//intracellular;GO:0043232//intracellular non-membrane-bounded organelle;GO:1903561//extracellular vesicle;GO:0044446//intracellular organelle part;GO:0044428//nuclear part;GO:0005576//extracellular region;GO:0005737//cytoplasm;GO:0070161//anchoring junction;GO:0016020//membrane;GO:0044464//cell part;GO:0043231//…	-	GO:0012501//programmed cell death;GO:0006915//apoptotic process;GO:0044763//single-organism cellular process;GO:0044699//single-organism process;GO:0008219//cell death;GO:0009987//cellular process
XP_014336305	0	31.84	0.001	0.483333	8.91687	0.018481	0.76904	no	KIAA0922	PREDICTED: transmembrane protein 131-like [Bison bison bison]	-	-	-	-	-	-	-
XM_005908524	0	19.2233	0.001	0.48	8.90689	0.0362977	0.974513	no	SMTN	PREDICTED: Bos mutus smoothelin (SMTN), transcript variant X2, mRNA	-	-	-	-	-	-	-
XM_005906561	0	15.9233	0.001	0.476667	8.89684	0.0455317	1	no	MINPP1	PREDICTED: Bos mutus multiple inositol-polyphosphate phosphatase 1 (MINPP1), transcript variant X1, mRNA	Metabolism	Carbohydrate metabolism	ko00010//Glycolysis / Gluconeogenesis;ko00562//Inositol phosphate metabolism	K03103	GO:0043227//membrane-bounded organelle;GO:0031982//vesicle;GO:0005576//extracellular region;GO:0043230//extracellular organelle;GO:1903561//extracellular vesicle;GO:0043226//organelle;GO:0044421//extracellular region part	GO:0034416//bisphosphoglycerate phosphatase activity;GO:0042578//phosphoric ester hydrolase activity;GO:0003824//catalytic activity;GO:0016787//hydrolase activity;GO:0016791//phosphatase activity;GO:0016788//hydrolase activity, acting on ester bonds	GO:0006796//phosphate-containing compound metabolic process;GO:0008152//metabolic process;GO:0009987//cellular process;GO:0044237//cellular metabolic process;GO:0006793//phosphorus metabolic process
XP_005898576	0	18.2	0.001	0.476667	8.89684	0.00229746	0.304216	no	ANKRD35	PREDICTED: ankyrin repeat domain-containing protein 35 [Bos mutus]	-	-	-	-	-	-	-
XP_005904604	0.03	24.3333	0.001	0.473333	8.88671	0.0268391	0.875253	no	RASGRF2	PREDICTED: ras-specific guanine nucleotide-releasing factor 2 [Bos mutus]	Environmental Information Processing	Signal transduction	ko04010//MAPK signaling pathway;ko04014//Ras signaling pathway	K12326	GO:0005623//cell;GO:0044464//cell part	GO:0005085//guanyl-nucleotide exchange factor activity;GO:0098772//molecular function regulator;GO:0005088//Ras guanyl-nucleotide exchange factor activity	GO:0007265//Ras protein signal transduction;GO:0044763//single-organism cellular process;GO:0035556//intracellular signal transduction;GO:0007154//cell communication;GO:0023052//signaling;GO:0050794//regulation of cellular process;GO:0065007//biological regulation;GO:0007264//small GTPase mediated signal transduction;GO:0050790//regulation of catalytic activity;GO:0007165//signal transduction;GO:…
XP_005893317	0	9.70333	0.001	0.466667	8.86625	0.0108747	0.627204	no	ZC3H12A	PREDICTED: ribonuclease ZC3H12A [Bos mutus]	-	-	-	-	GO:0043228//non-membrane-bounded organelle;GO:0044464//cell part;GO:0031974//membrane-enclosed lumen;GO:0070013//intracellular organelle lumen;GO:0005737//cytoplasm;GO:0044444//cytoplasmic part;GO:0031981//nuclear lumen;GO:0043231//intracellular membrane-bounded organelle;GO:0043226//organelle;GO:0043233//organelle lumen;GO:0043229//intracellular organelle;GO:0042175//nuclear outer membrane-endop…	GO:0003729//mRNA binding;GO:0004519//endonuclease activity;GO:0016788//hydrolase activity, acting on ester bonds;GO:0097159//organic cyclic compound binding;GO:0043169//cation binding;GO:0016787//hydrolase activity;GO:0044877//macromolecular complex binding;GO:0004527//exonuclease activity;GO:0004518//nuclease activity;GO:0003723//RNA binding;GO:0003730//mRNA 3'-UTR binding;GO:0044822//poly(A) RN…	GO:0044707//single-multicellular organism process;GO:0044092//negative regulation of molecular function;GO:0045472//response to ether;GO:0050779//RNA destabilization;GO:0042345//regulation of NF-kappaB import into nucleus;GO:0051252//regulation of RNA metabolic process;GO:0019222//regulation of metabolic process;GO:1901362//organic cyclic compound biosynthetic process;GO:1903522//regulation of bl…
[truncated: 1,847 more rows]
