# Supplementary material for: Gene expression dynamics during the gonocyte to spermatogonia transition and spermatogenesis in the domestic yak
Source: J Anim Sci Biotechnol. 2019 Jul 12;10:64. doi: 10.1186/s40104-019-0360-7 (PMC6624888; doi:10.1186/s40104-019-0360-7)
Supplement: Supplementary file 3 — Table S3. Comparative analysis of transcriptomes between 8 and 24 months old yak testes. (XLSX 1600 kb) [file 40104_2019_360_MOESM3_ESM.xlsx]

## Sheet: 40104_2019_360_MOESM3_ESM
id	Yspc_count	Yspt_count	Yspc_fpkm	Yspt_fpkm	log2(FC)	Pvalue	FDR	significant	Symbol	Description	KEGG_A_class	KEGG_B_class	Pathway	K_ID	GO Component	GO Function	GO Process
XP_005911315	0	292.35	0.001	64.7567	15.9827	0.000800363	0.0986574	no	LOC102279723	PREDICTED: heat shock protein HSP 90-alpha-like, partial [Bos mutus]	Environmental Information Processing;Genetic Information Processing;Organismal Systems	Folding, sorting and degradation;Endocrine system;Immune system;Signal transduction	ko04151//PI3K-Akt signaling pathway;ko04141//Protein processing in endoplasmic reticulum;ko04914//Progesterone-mediated oocyte maturation;ko04915//Estrogen signaling pathway;ko04612//Antigen processing and presentation;ko04621//NOD-like receptor signaling pathway	K04079	GO:0044464//cell part;GO:0005764//lysosome;GO:0000323//lytic vacuole;GO:1903561//extracellular vesicle;GO:0031410//cytoplasmic vesicle;GO:0005622//intracellular;GO:0031252//cell leading edge;GO:0097223//sperm part;GO:0044424//intracellular part;GO:0048770//pigment granule;GO:0097708//intracellular vesicle;GO:0031974//membrane-enclosed lumen;GO:0036126//sperm flagellum;GO:0070013//intracellular or…	GO:0051021//GDP-dissociation inhibitor binding;GO:0016772//transferase activity, transferring phosphorus-containing groups;GO:0005488//binding;GO:0019902//phosphatase binding;GO:0044822//poly(A) RNA binding;GO:0016817//hydrolase activity, acting on acid anhydrides;GO:1901265//nucleoside phosphate binding;GO:0016773//phosphotransferase activity, alcohol group as acceptor;GO:0019899//enzyme binding…	GO:0030098//lymphocyte differentiation;GO:0040011//locomotion;GO:0051234//establishment of localization;GO:0002429//immune response-activating cell surface receptor signaling pathway;GO:0002768//immune response-regulating cell surface receptor signaling pathway;GO:0032535//regulation of cellular component size;GO:0006941//striated muscle contraction;GO:0006996//organelle organization;GO:0044267//…
XP_005901121	0	118.427	0.001	43.7567	15.4172	0.00228589	0.16777	no	RPS14	40S ribosomal protein S14 [Homo sapiens]	Genetic Information Processing	Translation	ko03010//Ribosome	K02955	-	-	-
XP_014336764	0	2459.44	0.001	41.5567	15.3428	7.94e-05	0.0270179	up	KIF17	PREDICTED: kinesin-like protein KIF17 [Bos mutus]	-	-	-	-	-	-	-
XP_014338133	0	903.427	0.001	33.8967	15.0489	3.73e-21	1.96e-16	up	CEP70	PREDICTED: centrosomal protein of 70 kDa [Bos mutus]	-	-	-	-	GO:0012505//endomembrane system;GO:0005634//nucleus;GO:0044422//organelle part;GO:0043228//non-membrane-bounded organelle;GO:0031975//envelope;GO:0044464//cell part;GO:0005856//cytoskeleton;GO:0005635//nuclear envelope;GO:0005815//microtubule organizing center;GO:0043226//organelle;GO:0043231//intracellular membrane-bounded organelle;GO:0005622//intracellular;GO:0043232//intracellular non-membran…	-	-
XP_005890003	0	289.713	0.001	32.09	14.9698	5.05e-05	0.0195043	up	SPEM1	PREDICTED: spermatid maturation protein 1 [Bos mutus]	-	-	-	-	GO:0016020//membrane;GO:0044425//membrane part;GO:0031224//intrinsic component of membrane	-	GO:0003006//developmental process involved in reproduction;GO:0009987//cellular process;GO:0044707//single-multicellular organism process;GO:0051179//localization;GO:0032504//multicellular organism reproduction;GO:0022414//reproductive process;GO:0044703//multi-organism reproductive process;GO:0044699//single-organism process;GO:0032502//developmental process;GO:0006928//movement of cell or subce…
XP_014335620	0	19.9967	0.001	28.9067	14.8191	0.0245046	0.425552	no	LOC106701132	PREDICTED: stress-70 protein, mitochondrial-like [Colobus angolensis palliatus]	-	-	-	-	GO:0043231//intracellular membrane-bounded organelle;GO:0043229//intracellular organelle;GO:0044428//nuclear part;GO:0005912//adherens junction;GO:0044421//extracellular region part;GO:1903561//extracellular vesicle;GO:0043233//organelle lumen;GO:0031981//nuclear lumen;GO:0031974//membrane-enclosed lumen;GO:0005924//cell-substrate adherens junction;GO:0005622//intracellular;GO:0005634//nucleus;GO…	GO:0044389//ubiquitin-like protein ligase binding;GO:0005488//binding;GO:0019899//enzyme binding;GO:0001882//nucleoside binding;GO:0003676//nucleic acid binding;GO:0097367//carbohydrate derivative binding;GO:0003723//RNA binding;GO:0032550//purine ribonucleoside binding;GO:0032549//ribonucleoside binding;GO:0036094//small molecule binding;GO:0097159//organic cyclic compound binding;GO:1901363//he…	GO:0044699//single-organism process;GO:0032502//developmental process;GO:0015031//protein transport;GO:0048513//animal organ development;GO:0051234//establishment of localization;GO:0048731//system development;GO:0006886//intracellular protein transport;GO:0044707//single-multicellular organism process;GO:0048534//hematopoietic or lymphoid organ development;GO:0033036//macromolecule localization;…
XP_005900089	0	363.877	0.001	24.1533	14.5599	2.67e-13	2.34e-09	up	ERGIC3	endoplasmic reticulum-Golgi intermediate compartment protein 3 [Bos taurus]	-	-	-	-	GO:0043231//intracellular membrane-bounded organelle;GO:0016020//membrane;GO:0043227//membrane-bounded organelle;GO:0031224//intrinsic component of membrane;GO:0005737//cytoplasm;GO:0044424//intracellular part;GO:0042175//nuclear outer membrane-endoplasmic reticulum membrane network;GO:0043229//intracellular organelle;GO:0043226//organelle;GO:0044464//cell part;GO:0005623//cell;GO:0044425//membra…	-	GO:0051234//establishment of localization;GO:0006810//transport;GO:0051179//localization
XP_005901396	0	361.5	0.001	20.1133	14.2959	4.75e-05	0.0186376	up	CCT7	PREDICTED: T-complex protein 1 subunit eta [Bos mutus]	-	-	-	-	GO:0005576//extracellular region;GO:0005623//cell;GO:0043228//non-membrane-bounded organelle;GO:1903561//extracellular vesicle;GO:0043226//organelle;GO:0043229//intracellular organelle;GO:0031982//vesicle;GO:0044424//intracellular part;GO:0043232//intracellular non-membrane-bounded organelle;GO:0044464//cell part;GO:0032991//macromolecular complex;GO:0043231//intracellular membrane-bounded organe…	GO:0005515//protein binding;GO:0001882//nucleoside binding;GO:0005488//binding;GO:0032549//ribonucleoside binding;GO:1901363//heterocyclic compound binding;GO:0097159//organic cyclic compound binding;GO:0032550//purine ribonucleoside binding;GO:0036094//small molecule binding;GO:0001883//purine nucleoside binding;GO:0097367//carbohydrate derivative binding	GO:0051704//multi-organism process;GO:0007338//single fertilization;GO:0044702//single organism reproductive process;GO:0019953//sexual reproduction;GO:0051234//establishment of localization;GO:0009987//cellular process;GO:0035036//sperm-egg recognition;GO:0022414//reproductive process;GO:0044763//single-organism cellular process;GO:0009988//cell-cell recognition;GO:0008037//cell recognition;GO:0…
XP_005888275	0	1200.97	0.001	19.0667	14.2188	2.97e-19	7.12e-15	up	CPD	PREDICTED: carboxypeptidase D [Bison bison bison]	-	-	-	-	-	-	-
XP_005901388	0	1957.16	0.001	18.7467	14.1943	9.16e-05	0.0297056	up	SLX4	PREDICTED: structure-specific endonuclease subunit SLX4 [Bos mutus]	Genetic Information Processing	Replication and repair	ko03460//Fanconi anemia pathway	K10484	GO:0044464//cell part;GO:0031974//membrane-enclosed lumen;GO:0043233//organelle lumen;GO:0070013//intracellular organelle lumen;GO:0000781//chromosome, telomeric region;GO:0000109//nucleotide-excision repair complex;GO:0044424//intracellular part;GO:0043226//organelle;GO:0005622//intracellular;GO:0043232//intracellular non-membrane-bounded organelle;GO:0005634//nucleus;GO:0044446//intracellular o…	GO:0004519//endonuclease activity;GO:0004520//endodeoxyribonuclease activity;GO:0004518//nuclease activity;GO:0016893//endonuclease activity, active with either ribo- or deoxyribonucleic acids and producing 5'-phosphomonoesters;GO:0016894//endonuclease activity, active with either ribo- or deoxyribonucleic acids and producing 3'-phosphomonoesters;GO:0003824//catalytic activity;GO:0016787//hydrola…	GO:0000729//DNA double-strand break processing;GO:0006950//response to stress;GO:0010638//positive regulation of organelle organization;GO:0080090//regulation of primary metabolic process;GO:0046483//heterocycle metabolic process;GO:0065009//regulation of molecular function;GO:0071216//cellular response to biotic stimulus;GO:0009893//positive regulation of metabolic process;GO:0031325//positive r…
XP_005909198	0	343.99	0.001	16.71	14.0284	0.00063308	0.089431	no	LOC102277263	PREDICTED: clusterin-like [Bos mutus]	-	-	-	-	GO:0099503//secretory vesicle;GO:0044422//organelle part;GO:0005622//intracellular;GO:0005623//cell;GO:0005740//mitochondrial envelope;GO:0031982//vesicle;GO:0044464//cell part;GO:0043005//neuron projection;GO:0032994//protein-lipid complex;GO:0043229//intracellular organelle;GO:0043231//intracellular membrane-bounded organelle;GO:0042995//cell projection;GO:1903561//extracellular vesicle;GO:0016…	GO:0016818//hydrolase activity, acting on acid anhydrides, in phosphorus-containing anhydrides;GO:0005515//protein binding;GO:0016787//hydrolase activity;GO:0005488//binding;GO:0017111//nucleoside-triphosphatase activity;GO:0016817//hydrolase activity, acting on acid anhydrides;GO:0044389//ubiquitin-like protein ligase binding;GO:0019899//enzyme binding;GO:0016462//pyrophosphatase activity;GO:000…	GO:0044699//single-organism process;GO:0031325//positive regulation of cellular metabolic process;GO:0009056//catabolic process;GO:0001932//regulation of protein phosphorylation;GO:0007154//cell communication;GO:0050896//response to stimulus;GO:0031399//regulation of protein modification process;GO:0050789//regulation of biological process;GO:0010941//regulation of cell death;GO:0044238//primary …
XP_005903080	0	137.12	0.001	16.6867	14.0264	0.000121343	0.0364375	up	BAG1	PREDICTED: BAG family molecular chaperone regulator 1 [Bos mutus]	Genetic Information Processing	Folding, sorting and degradation	ko04141//Protein processing in endoplasmic reticulum	K09555	-	-	-
XP_005887324	0	933.497	0.001	16.5133	14.0113	5.1e-07	0.000582957	up	ULK2	PREDICTED: serine/threonine-protein kinase ULK2 isoform X1 [Bos taurus]	Environmental Information Processing;Cellular Processes	Transport and catabolism;Signal transduction	ko04150//mTOR signaling pathway;ko04140//Regulation of autophagy	K08269	-	-	-
XP_005899289	0	275.037	0.001	16.2267	13.9861	0.000669285	0.0925551	no	KLHL10	PREDICTED: kelch-like protein 10 [Bubalus bubalis]	-	-	-	-	-	-	-
XP_014337080	0	196.34	0.001	14.8533	13.8585	7.44e-08	0.00011854	up	AZIN2	antizyme inhibitor 2 [Bos mutus]	Metabolism	Amino acid metabolism	ko00330//Arginine and proline metabolism	K01583	-	-	-
XP_014337230	0	155.187	0.001	14.2033	13.7939	1.46e-08	3.33e-05	up	HSDL2	Hydroxysteroid dehydrogenase-like protein 2, partial [Bos mutus]	-	-	-	-	GO:0005737//cytoplasm;GO:0043231//intracellular membrane-bounded organelle;GO:0044444//cytoplasmic part;GO:0042579//microbody;GO:0043229//intracellular organelle;GO:0044464//cell part;GO:0043227//membrane-bounded organelle;GO:0005622//intracellular;GO:0044424//intracellular part;GO:0043226//organelle;GO:0005623//cell	GO:0003824//catalytic activity	GO:0044710//single-organism metabolic process;GO:0008152//metabolic process;GO:0044699//single-organism process
XP_005903089	0	877.067	0.001	14.13	13.7865	0.000173079	0.0454765	up	UBAP2	ubiquitin-associated protein 2 [Bos taurus]	-	-	-	-	-	-	-
XP_014334775	0	776.96	0.001	13.7267	13.7447	0.000200877	0.050029	no	MLLT10	Protein AF-10 [Bos mutus]	-	-	-	-	GO:0044464//cell part;GO:0044424//intracellular part;GO:0005623//cell;GO:0005622//intracellular	GO:0043169//cation binding;GO:0046872//metal ion binding;GO:0043167//ion binding;GO:0046914//transition metal ion binding;GO:0005488//binding	GO:0046483//heterocycle metabolic process;GO:0008152//metabolic process;GO:0044260//cellular macromolecule metabolic process;GO:0044237//cellular metabolic process;GO:0097659//nucleic acid-templated transcription;GO:0043170//macromolecule metabolic process;GO:0009059//macromolecule biosynthetic process;GO:0009058//biosynthetic process;GO:0016070//RNA metabolic process;GO:0019438//aromatic compoun…
XP_005899253	0	274.93	0.001	13.0933	13.6765	1.01e-10	4.82e-07	up	FAM134C	PREDICTED: protein FAM134C [Bos mutus]	-	-	-	-	GO:0016020//membrane;GO:0044425//membrane part;GO:0031224//intrinsic component of membrane	-	-
XP_005909803	0	151.28	0.001	12.13	13.5663	8.12e-05	0.0273537	up	VDAC2	voltage-dependent anion-selective channel protein 2 [Bos taurus]	Environmental Information Processing	Signal transduction	ko04020//Calcium signaling pathway;ko04022//cGMP - PKG signaling pathway	K15040	GO:0019866//organelle inner membrane;GO:0005740//mitochondrial envelope;GO:0043231//intracellular membrane-bounded organelle;GO:0005739//mitochondrion;GO:0044425//membrane part;GO:0044421//extracellular region part;GO:0005622//intracellular;GO:0043230//extracellular organelle;GO:0031224//intrinsic component of membrane;GO:0044429//mitochondrial part;GO:0044422//organelle part;GO:0044444//cytoplas…	GO:0015075//ion transmembrane transporter activity;GO:0022892//substrate-specific transporter activity;GO:0005215//transporter activity;GO:0005488//binding;GO:0022836//gated channel activity;GO:0036094//small molecule binding;GO:0022803//passive transmembrane transporter activity;GO:0022891//substrate-specific transmembrane transporter activity;GO:0022832//voltage-gated channel activity;GO:002285…	GO:0097190//apoptotic signaling pathway;GO:0034765//regulation of ion transmembrane transport;GO:0006811//ion transport;GO:0044763//single-organism cellular process;GO:0008219//cell death;GO:0044699//single-organism process;GO:0050896//response to stimulus;GO:0097193//intrinsic apoptotic signaling pathway;GO:0065007//biological regulation;GO:0012501//programmed cell death;GO:0051234//establishmen…
XP_005910362	0	326.137	0.001	12.06	13.5579	2.7e-11	1.78e-07	up	SUN1	PREDICTED: SUN domain-containing protein 1-like, partial [Bos mutus]	-	-	-	-	GO:0044425//membrane part;GO:0044424//intracellular part;GO:0031967//organelle envelope;GO:0005635//nuclear envelope;GO:0043227//membrane-bounded organelle;GO:0043226//organelle;GO:0019866//organelle inner membrane;GO:0005637//nuclear inner membrane;GO:0005634//nucleus;GO:0012505//endomembrane system;GO:0044464//cell part;GO:0044422//organelle part;GO:0005622//intracellular;GO:0031090//organelle …	GO:0005488//binding;GO:0005515//protein binding	GO:0044702//single organism reproductive process;GO:0051321//meiotic cell cycle;GO:0007010//cytoskeleton organization;GO:0048285//organelle fission;GO:0006997//nucleus organization;GO:1903046//meiotic cell cycle process;GO:0043578//nuclear matrix organization;GO:0007126//meiotic nuclear division;GO:0044699//single-organism process;GO:0000280//nuclear division;GO:0044763//single-organism cellular …
XP_005911922	0	570.813	0.001	11.54	13.4944	6.3e-14	6.62e-10	up	USP11	PREDICTED: LOW QUALITY PROTEIN: ubiquitin specific peptidase 11 [Bos mutus]	-	-	-	-	-	-	-
XP_005890563	0	208.183	0.001	11.3667	13.4725	2.97e-09	8.68e-06	up	KCTD20	PREDICTED: BTB/POZ domain-containing protein KCTD20 [Bos mutus]	-	-	-	-	-	-	GO:0008152//metabolic process;GO:0016310//phosphorylation;GO:0009987//cellular process;GO:0006793//phosphorus metabolic process;GO:0006796//phosphate-containing compound metabolic process;GO:0044237//cellular metabolic process
XP_005897191	0	599.497	0.001	11.0867	13.4365	0.000287046	0.0611635	no	HYOU1	PREDICTED: hypoxia up-regulated protein 1 [Bos mutus]	Genetic Information Processing	Folding, sorting and degradation	ko04141//Protein processing in endoplasmic reticulum	K09486	GO:0043234//protein complex;GO:0044421//extracellular region part;GO:0030055//cell-substrate junction;GO:0070161//anchoring junction;GO:0043227//membrane-bounded organelle;GO:0005912//adherens junction;GO:0005576//extracellular region;GO:1903561//extracellular vesicle;GO:0030054//cell junction;GO:0005924//cell-substrate adherens junction;GO:0031982//vesicle;GO:0032991//macromolecular complex;GO:0…	GO:1901363//heterocyclic compound binding;GO:0097367//carbohydrate derivative binding;GO:0001882//nucleoside binding;GO:0005488//binding;GO:0001883//purine nucleoside binding;GO:0032549//ribonucleoside binding;GO:0032550//purine ribonucleoside binding;GO:0097159//organic cyclic compound binding;GO:0036094//small molecule binding	GO:0044763//single-organism cellular process;GO:0048519//negative regulation of biological process;GO:0080134//regulation of response to stress;GO:0048523//negative regulation of cellular process;GO:0044699//single-organism process;GO:0006915//apoptotic process;GO:0070997//neuron death;GO:0033554//cellular response to stress;GO:0048583//regulation of response to stimulus;GO:1900037//regulation of…
XP_014335273	0	102.283	0.001	10.9967	13.4248	0.000240034	0.0556844	no	DNAJB1	PREDICTED: dnaJ homolog subfamily B member 1 isoform X1 [Bos taurus]	Genetic Information Processing	Folding, sorting and degradation	ko04141//Protein processing in endoplasmic reticulum	K09507	GO:0031974//membrane-enclosed lumen;GO:0044421//extracellular region part;GO:0043233//organelle lumen;GO:0005623//cell;GO:0005634//nucleus;GO:0044446//intracellular organelle part;GO:1903561//extracellular vesicle;GO:0005622//intracellular;GO:0044464//cell part;GO:0031982//vesicle;GO:0031981//nuclear lumen;GO:0043231//intracellular membrane-bounded organelle;GO:0044428//nuclear part;GO:0043230//e…	GO:0030234//enzyme regulator activity;GO:0031072//heat shock protein binding;GO:0005488//binding;GO:0008047//enzyme activator activity;GO:0005515//protein binding;GO:0019899//enzyme binding;GO:0098772//molecular function regulator	GO:0051129//negative regulation of cellular component organization;GO:0043462//regulation of ATPase activity;GO:0034605//cellular response to heat;GO:0009628//response to abiotic stimulus;GO:0051084//'de novo' posttranslational protein folding;GO:0065007//biological regulation;GO:0042221//response to chemical;GO:0050896//response to stimulus;GO:0051128//regulation of cellular component organizati…
XP_014335275	0	102.283	0.001	10.9967	13.4248	0.000240351	0.0556844	no	DNAJB1	PREDICTED: dnaJ homolog subfamily B member 1 isoform X1 [Bos taurus]	Genetic Information Processing	Folding, sorting and degradation	ko04141//Protein processing in endoplasmic reticulum	K09507	GO:0070013//intracellular organelle lumen;GO:0031974//membrane-enclosed lumen;GO:0044464//cell part;GO:0044421//extracellular region part;GO:0031982//vesicle;GO:0005737//cytoplasm;GO:0044444//cytoplasmic part;GO:0043233//organelle lumen;GO:0044428//nuclear part;GO:0043227//membrane-bounded organelle;GO:0043226//organelle;GO:0044422//organelle part;GO:0043230//extracellular organelle;GO:0005622//i…	GO:0005515//protein binding;GO:0030234//enzyme regulator activity;GO:0005488//binding;GO:0008047//enzyme activator activity;GO:0019899//enzyme binding;GO:0031072//heat shock protein binding;GO:0098772//molecular function regulator	GO:0050896//response to stimulus;GO:0065007//biological regulation;GO:0009987//cellular process;GO:0009408//response to heat;GO:0010033//response to organic substance;GO:0048523//negative regulation of cellular process;GO:0065009//regulation of molecular function;GO:0048519//negative regulation of biological process;GO:0009628//response to abiotic stimulus;GO:0033554//cellular response to stress;…
XP_014333946	0	112.73	0.001	10.98	13.4226	3.1e-07	0.000378421	up	FAM96B	PREDICTED: mitotic spindle-associated MMXD complex subunit MIP18 isoform X1 [Bos taurus]	-	-	-	-	-	-	-
XP_014337511	0	911.18	0.001	10.8867	13.4103	0.000164931	0.0437734	up	PSME4	PREDICTED: LOW QUALITY PROTEIN: proteasome activator complex subunit 4 [Bos mutus]	Genetic Information Processing	Folding, sorting and degradation	ko03050//Proteasome	K06699	GO:0044451//nucleoplasm part;GO:0043226//organelle;GO:0044444//cytoplasmic part;GO:1902494//catalytic complex;GO:0031974//membrane-enclosed lumen;GO:0032991//macromolecular complex;GO:0031981//nuclear lumen;GO:0044446//intracellular organelle part;GO:0070013//intracellular organelle lumen;GO:0044422//organelle part;GO:0016020//membrane;GO:0043229//intracellular organelle;GO:1905369//endopeptidase…	GO:0098772//molecular function regulator;GO:0005515//protein binding;GO:0005488//binding;GO:0008047//enzyme activator activity;GO:0042393//histone binding;GO:0030234//enzyme regulator activity	GO:0080090//regulation of primary metabolic process;GO:0043170//macromolecule metabolic process;GO:0006725//cellular aromatic compound metabolic process;GO:0044237//cellular metabolic process;GO:0032502//developmental process;GO:0006259//DNA metabolic process;GO:0032270//positive regulation of cellular protein metabolic process;GO:0019538//protein metabolic process;GO:0044257//cellular protein ca…
XP_014337754	0	76.3933	0.001	10.5433	13.364	3.09e-06	0.00242436	up	WBP2	PREDICTED: WW domain-binding protein 2 isoform X1 [Bos taurus]	-	-	-	-	-	GO:1901363//heterocyclic compound binding;GO:0003677//DNA binding;GO:0043565//sequence-specific DNA binding;GO:1990837//sequence-specific double-stranded DNA binding;GO:0001076//transcription factor activity, RNA polymerase II transcription factor binding;GO:0001067//regulatory region nucleic acid binding;GO:0000975//regulatory region DNA binding;GO:0044212//transcription regulatory region DNA bi…	GO:0044271//cellular nitrogen compound biosynthetic process;GO:0006351//transcription, DNA-templated;GO:0034641//cellular nitrogen compound metabolic process;GO:1905269//positive regulation of chromatin organization;GO:1901576//organic substance biosynthetic process;GO:2000758//positive regulation of peptidyl-lysine acetylation;GO:0010604//positive regulation of macromolecule metabolic process;GO…
XM_014480134	0	132.217	0.001	10.3133	13.3322	0.00192181	0.156346	no	LOC106701132	PREDICTED: Bos mutus stress-70 protein, mitochondrial-like (LOC106701132), mRNA	Genetic Information Processing	Folding, sorting and degradation	ko03018//RNA degradation	K04043	GO:0005623//cell;GO:0043233//organelle lumen;GO:0044446//intracellular organelle part;GO:0030054//cell junction;GO:0031974//membrane-enclosed lumen;GO:0030055//cell-substrate junction;GO:0005924//cell-substrate adherens junction;GO:0005576//extracellular region;GO:0043227//membrane-bounded organelle;GO:0044428//nuclear part;GO:0043229//intracellular organelle;GO:0044422//organelle part;GO:0043230…	GO:0032550//purine ribonucleoside binding;GO:0001882//nucleoside binding;GO:0044389//ubiquitin-like protein ligase binding;GO:0005488//binding;GO:0097159//organic cyclic compound binding;GO:0005515//protein binding;GO:0003676//nucleic acid binding;GO:0001883//purine nucleoside binding;GO:0036094//small molecule binding;GO:0019899//enzyme binding;GO:0097367//carbohydrate derivative binding;GO:0003…	GO:0048856//anatomical structure development;GO:0008104//protein localization;GO:0051234//establishment of localization;GO:0007275//multicellular organism development;GO:0033036//macromolecule localization;GO:0071702//organic substance transport;GO:0044767//single-organism developmental process;GO:0044699//single-organism process;GO:0070727//cellular macromolecule localization;GO:0015031//protein…
XP_005892344	0	697.597	0.001	10.18	13.3134	8.77e-07	0.000959931	up	SUCO	PREDICTED: SUN domain-containing ossification factor isoform X1 [Bos mutus]	-	-	-	-	-	-	GO:0044763//single-organism cellular process;GO:0010556//regulation of macromolecule biosynthetic process;GO:0019222//regulation of metabolic process;GO:0009893//positive regulation of metabolic process;GO:0034103//regulation of tissue remodeling;GO:0044767//single-organism developmental process;GO:0009987//cellular process;GO:0044707//single-multicellular organism process;GO:0060255//regulation …
XP_005904435	0	604.91	0.001	9.87667	13.2698	0.000281689	0.0606836	no	USP7	PREDICTED: ubiquitin carboxyl-terminal hydrolase 7 isoform X1 [Bos mutus]	Environmental Information Processing	Signal transduction	ko04068//FoxO signaling pathway	K11838	GO:0044464//cell part;GO:0043227//membrane-bounded organelle;GO:0043229//intracellular organelle;GO:0044446//intracellular organelle part;GO:0005654//nucleoplasm;GO:0044451//nucleoplasm part;GO:0005623//cell;GO:0043226//organelle;GO:0043233//organelle lumen;GO:0044422//organelle part;GO:0070013//intracellular organelle lumen;GO:0005622//intracellular;GO:0044424//intracellular part;GO:0043231//int…	GO:0044389//ubiquitin-like protein ligase binding;GO:0070011//peptidase activity, acting on L-amino acid peptides;GO:0005515//protein binding;GO:0004175//endopeptidase activity;GO:0046983//protein dimerization activity;GO:0016787//hydrolase activity;GO:0008233//peptidase activity;GO:0036459//thiol-dependent ubiquitinyl hydrolase activity;GO:0101005//ubiquitinyl hydrolase activity;GO:0019899//enzy…	GO:0019219//regulation of nucleobase-containing compound metabolic process;GO:0071840//cellular component organization or biogenesis;GO:0044699//single-organism process;GO:0012501//programmed cell death;GO:0065007//biological regulation;GO:0006139//nucleobase-containing compound metabolic process;GO:0065008//regulation of biological quality;GO:0044403//symbiosis, encompassing mutualism through pa…
XP_005904298	0	436.577	0.001	9.79333	13.2576	0.000447735	0.0744573	no	HK1	PREDICTED: LOW QUALITY PROTEIN: hexokinase-1, partial [Bos mutus]	Environmental Information Processing;Metabolism;Organismal Systems	Biosynthesis of other secondary metabolites;Signal transduction;Global and Overview;Digestive system;Carbohydrate metabolism;Endocrine system	ko04910//Insulin signaling pathway;ko01200//Carbon metabolism;ko04066//HIF-1 signaling pathway;ko00010//Glycolysis / Gluconeogenesis;ko00500//Starch and sucrose metabolism;ko00520//Amino sugar and nucleotide sugar metabolism;ko04973//Carbohydrate digestion and absorption;ko00051//Fructose and mannose metabolism;ko00052//Galactose metabolism;ko00524//Butirosin and neomycin biosynthesis	K00844	-	-	-
XP_005908748	0	201.66	0.001	9.60667	13.2298	1.84e-09	6.03e-06	up	CSRNP2	PREDICTED: cysteine/serine-rich nuclear protein 2 [Bos mutus]	-	-	-	-	GO:0005622//intracellular;GO:0043227//membrane-bounded organelle;GO:0005623//cell;GO:0043226//organelle;GO:0044424//intracellular part;GO:0044464//cell part;GO:0043229//intracellular organelle;GO:0043231//intracellular membrane-bounded organelle	GO:0005515//protein binding;GO:1901363//heterocyclic compound binding;GO:0003677//DNA binding;GO:0097159//organic cyclic compound binding;GO:0019899//enzyme binding;GO:0001071//nucleic acid binding transcription factor activity;GO:0005488//binding;GO:0003676//nucleic acid binding	GO:0051174//regulation of phosphorus metabolic process;GO:0019222//regulation of metabolic process;GO:0050790//regulation of catalytic activity;GO:0071704//organic substance metabolic process;GO:0031323//regulation of cellular metabolic process;GO:0019220//regulation of phosphate metabolic process;GO:0065007//biological regulation;GO:0046483//heterocycle metabolic process;GO:0006807//nitrogen com…
XM_005892097	0	189.38	0.001	9.50667	13.2147	2.62e-09	8.09e-06	up	IP6K1	PREDICTED: Bos mutus inositol hexakisphosphate kinase 1 (IP6K1), transcript variant X2, mRNA	Environmental Information Processing	Signal transduction	ko04070//Phosphatidylinositol signaling system	K07756	GO:0005623//cell;GO:0043231//intracellular membrane-bounded organelle;GO:0031974//membrane-enclosed lumen;GO:0043227//membrane-bounded organelle;GO:0044428//nuclear part;GO:0044424//intracellular part;GO:0043229//intracellular organelle;GO:0044464//cell part;GO:0044446//intracellular organelle part;GO:0043233//organelle lumen;GO:0070013//intracellular organelle lumen;GO:0044422//organelle part;GO…	GO:0016773//phosphotransferase activity, alcohol group as acceptor;GO:0016772//transferase activity, transferring phosphorus-containing groups;GO:0016740//transferase activity;GO:0003824//catalytic activity;GO:0016301//kinase activity;GO:0051766//inositol trisphosphate kinase activity	GO:0044763//single-organism cellular process;GO:0044710//single-organism metabolic process;GO:0006650//glycerophospholipid metabolic process;GO:0006793//phosphorus metabolic process;GO:0044699//single-organism process;GO:0044238//primary metabolic process;GO:0071704//organic substance metabolic process;GO:0019637//organophosphate metabolic process;GO:0006629//lipid metabolic process;GO:0006796//p…
XP_005905251	0	77.8333	0.001	9.11667	13.1543	0.000352421	0.0664228	no	LOC102267338	RIKEN cDNA 1700013G24 [Mus musculus]	-	-	-	-	-	-	-
XP_014336763	0	77.8333	0.001	9.11667	13.1543	0.000352614	0.0664228	no	LOC102267338	RIKEN cDNA 1700013G24 [Mus musculus]	-	-	-	-	-	-	-
Unigene025452	0	29.63	0.001	8.83	13.1082	0.000190802	0.0477459	up	-	-	-	-	-	-	-	-	-
XP_005908047	0	56.2767	0.001	8.80667	13.1044	0.000980518	0.11138	no	KCTD2	PREDICTED: BTB/POZ domain-containing protein KCTD2, partial [Ictidomys tridecemlineatus]	-	-	-	-	-	-	GO:0070271//protein complex biogenesis;GO:0043933//macromolecular complex subunit organization;GO:0071822//protein complex subunit organization;GO:0044085//cellular component biogenesis;GO:0071840//cellular component organization or biogenesis;GO:0051259//protein oligomerization;GO:0065003//macromolecular complex assembly;GO:0022607//cellular component assembly;GO:0009987//cellular process;GO:001…
XP_005905442	0	218.99	0.001	8.68667	13.0846	0.00122528	0.126375	no	P4HB	PREDICTED: protein disulfide-isomerase [Bos mutus]	Genetic Information Processing	Folding, sorting and degradation	ko04141//Protein processing in endoplasmic reticulum	K09580	-	-	-
XP_005910501	0	222.807	0.001	8.67667	13.0829	0.00118832	0.124215	no	ALDH1A2	PREDICTED: retinal dehydrogenase 2 isoform X2 [Bos taurus]	Metabolism	Metabolism of cofactors and vitamins	ko00830//Retinol metabolism	K07249	-	-	-
XP_005887100	0	968.38	0.001	8.62	13.0735	0.000157958	0.0430088	up	TRIP12	PREDICTED: E3 ubiquitin-protein ligase TRIP12 [Bos mutus]	Genetic Information Processing	Folding, sorting and degradation	ko04120//Ubiquitin mediated proteolysis	K10590	-	-	-
XP_005894881	0	24.78	0.001	8.44667	13.0442	0.000376586	0.0687355	no	TMEM107	transmembrane protein 107 [Bos taurus]	-	-	-	-	GO:0031224//intrinsic component of membrane;GO:0044425//membrane part;GO:0016020//membrane	-	GO:0044707//single-multicellular organism process;GO:0009790//embryo development;GO:0035107//appendage morphogenesis;GO:0030326//embryonic limb morphogenesis;GO:0022607//cellular component assembly;GO:0007275//multicellular organism development;GO:0009987//cellular process;GO:0048869//cellular developmental process;GO:0060173//limb development;GO:0048646//anatomical structure formation involved i…
XP_005907851	0	524.337	0.001	8.38	13.0327	2.85e-06	0.00233939	up	MAN2A1	PREDICTED: LOW QUALITY PROTEIN: alpha-mannosidase 2 [Bos mutus]	Metabolism	Glycan biosynthesis and metabolism	ko00510//N-Glycan biosynthesis	K01231	-	-	-
XP_005898764	0	236.09	0.001	8.27667	13.0148	0.00111627	0.119714	no	MSTO1	PREDICTED: protein misato homolog 1-like isoform X1 [Bos mutus]	-	-	-	-	GO:0031966//mitochondrial membrane;GO:0043226//organelle;GO:0043229//intracellular organelle;GO:0044446//intracellular organelle part;GO:0031975//envelope;GO:0005623//cell;GO:0044422//organelle part;GO:0044424//intracellular part;GO:0005622//intracellular;GO:0005739//mitochondrion;GO:0043227//membrane-bounded organelle;GO:0043231//intracellular membrane-bounded organelle;GO:0016020//membrane;GO:0…	-	GO:0009987//cellular process;GO:0007005//mitochondrion organization;GO:0016043//cellular component organization;GO:0006996//organelle organization;GO:0071840//cellular component organization or biogenesis
XP_005906730	0	104.33	0.001	8.01667	12.9688	0.0027264	0.180276	no	TEKT1	PREDICTED: tektin-1-like [Bos mutus]	-	-	-	-	GO:0005623//cell;GO:0043229//intracellular organelle;GO:0015630//microtubule cytoskeleton;GO:0044464//cell part;GO:0005856//cytoskeleton;GO:0042995//cell projection;GO:0043232//intracellular non-membrane-bounded organelle;GO:0043226//organelle;GO:0043228//non-membrane-bounded organelle;GO:0005622//intracellular;GO:0044424//intracellular part	-	-
XP_005907751	0	126.94	0.001	8.00333	12.9664	0.00277033	0.180845	no	SLC25A39	solute carrier family 25 member 39 [Bos taurus]	-	-	-	-	-	-	-
XP_014332103	0	272.253	0.001	7.98	12.9622	3.7e-10	1.5e-06	up	SAMD4B	PREDICTED: protein Smaug homolog 2 [Bos mutus]	-	-	-	-	GO:0005622//intracellular;GO:0005623//cell;GO:0044424//intracellular part;GO:0044464//cell part	GO:1901363//heterocyclic compound binding;GO:0097159//organic cyclic compound binding;GO:0003723//RNA binding;GO:0003676//nucleic acid binding;GO:0005488//binding	GO:0044238//primary metabolic process;GO:0009059//macromolecule biosynthetic process;GO:0006725//cellular aromatic compound metabolic process;GO:0044249//cellular biosynthetic process;GO:0006139//nucleobase-containing compound metabolic process;GO:0016070//RNA metabolic process;GO:0009058//biosynthetic process;GO:0034641//cellular nitrogen compound metabolic process;GO:0071704//organic substance …
XP_005908438	0	141.967	0.001	7.87333	12.9428	0.00235861	0.168226	no	LOC102284655	Chromosome 3 open reading frame 38 [Homo sapiens]	-	-	-	-	-	-	-
XP_014337865	0	69.91	0.001	7.63667	12.8987	0.00632503	0.261512	no	U2AF1L4	PREDICTED: splicing factor U2AF 26 kDa subunit isoform X2 [Pantholops hodgsonii]	Genetic Information Processing	Transcription	ko03040//Spliceosome	K12836	GO:0031981//nuclear lumen;GO:0005622//intracellular;GO:0043227//membrane-bounded organelle;GO:0044422//organelle part;GO:0032991//macromolecular complex;GO:0031974//membrane-enclosed lumen;GO:0043226//organelle;GO:0005623//cell;GO:0043229//intracellular organelle;GO:0044451//nucleoplasm part;GO:0005634//nucleus;GO:0016604//nuclear body;GO:0043233//organelle lumen;GO:0070013//intracellular organel…	GO:1901363//heterocyclic compound binding;GO:0043169//cation binding;GO:0097159//organic cyclic compound binding;GO:0043167//ion binding;GO:0003676//nucleic acid binding;GO:0005488//binding	GO:0010467//gene expression;GO:0034641//cellular nitrogen compound metabolic process;GO:0043170//macromolecule metabolic process;GO:0016070//RNA metabolic process;GO:0046483//heterocycle metabolic process;GO:0044237//cellular metabolic process;GO:0006807//nitrogen compound metabolic process;GO:0000375//RNA splicing, via transesterification reactions;GO:0008152//metabolic process;GO:0006725//cellu…
XP_005897523	0	137.043	0.001	7.42	12.8572	5.31e-08	9.3e-05	up	GPBP1	PREDICTED: vasculin isoform X2 [Bos mutus]	-	-	-	-	-	-	-
XP_005910863	0	81.5967	0.001	7.24333	12.8224	0.000570377	0.0846704	no	LOC102283287	PREDICTED: cytochrome b-c1 complex subunit Rieske, mitochondrial-like [Bos mutus]	Organismal Systems;Metabolism	Circulatory system;Energy metabolism	ko00190//Oxidative phosphorylation;ko04260//Cardiac muscle contraction	K00411	GO:0044422//organelle part;GO:0043231//intracellular membrane-bounded organelle;GO:0019866//organelle inner membrane;GO:0044424//intracellular part;GO:0005740//mitochondrial envelope;GO:0005623//cell;GO:0044464//cell part;GO:0044444//cytoplasmic part;GO:0044446//intracellular organelle part;GO:0005739//mitochondrion;GO:0044429//mitochondrial part;GO:0016020//membrane;GO:0005737//cytoplasm;GO:0043…	GO:0043167//ion binding;GO:0005488//binding;GO:0015077//monovalent inorganic cation transmembrane transporter activity;GO:0022892//substrate-specific transporter activity;GO:0005215//transporter activity;GO:0015075//ion transmembrane transporter activity;GO:0008324//cation transmembrane transporter activity;GO:0022890//inorganic cation transmembrane transporter activity;GO:0003824//catalytic acti…	GO:0008152//metabolic process;GO:0006810//transport;GO:0051234//establishment of localization;GO:0015672//monovalent inorganic cation transport;GO:0009636//response to toxic substance;GO:0044699//single-organism process;GO:0006812//cation transport;GO:0051179//localization;GO:0006818//hydrogen transport;GO:0015992//proton transport;GO:0006811//ion transport;GO:1902578//single-organism localizatio…
XP_005897249	0	316.887	0.001	7.19	12.8118	0.000709071	0.0947217	no	SIDT2	PREDICTED: SID1 transmembrane family member 2 isoform X2 [Bos mutus]	-	-	-	-	GO:0005622//intracellular;GO:0005737//cytoplasm;GO:0044444//cytoplasmic part;GO:0044464//cell part;GO:0044424//intracellular part;GO:0005773//vacuole;GO:0043231//intracellular membrane-bounded organelle;GO:0005623//cell;GO:0043229//intracellular organelle;GO:0016020//membrane;GO:0043227//membrane-bounded organelle;GO:0044425//membrane part;GO:0000323//lytic vacuole;GO:0043226//organelle;GO:003122…	GO:0015932//nucleobase-containing compound transmembrane transporter activity;GO:0051032//nucleic acid transmembrane transporter activity;GO:0022884//macromolecule transmembrane transporter activity;GO:0022857//transmembrane transporter activity;GO:0022892//substrate-specific transporter activity;GO:0022891//substrate-specific transmembrane transporter activity;GO:0005215//transporter activity	GO:0002064//epithelial cell development;GO:0050789//regulation of biological process;GO:0048878//chemical homeostasis;GO:0030855//epithelial cell differentiation;GO:0090276//regulation of peptide hormone secretion;GO:0008283//cell proliferation;GO:0090087//regulation of peptide transport;GO:0060429//epithelium development;GO:0050796//regulation of insulin secretion;GO:0010646//regulation of cell …
XP_005910096	0	69.9533	0.001	7.18	12.8098	0.00637433	0.262057	no	TPM3	PREDICTED: tropomyosin alpha-3 chain-like isoform X2 [Bos mutus]	Organismal Systems	Circulatory system	ko04261//Adrenergic signaling in cardiomyocytes;ko04260//Cardiac muscle contraction	K09290	GO:0044424//intracellular part;GO:1903561//extracellular vesicle;GO:0036379//myofilament;GO:0044422//organelle part;GO:0015629//actin cytoskeleton;GO:0044446//intracellular organelle part;GO:0005737//cytoplasm;GO:0030017//sarcomere;GO:0044464//cell part;GO:0005856//cytoskeleton;GO:0099080//supramolecular complex;GO:0097458//neuron part;GO:0005865//striated muscle thin filament;GO:0043229//intrace…	GO:0005515//protein binding;GO:0008092//cytoskeletal protein binding;GO:0005488//binding	GO:0048731//system development;GO:0044763//single-organism cellular process;GO:0006936//muscle contraction;GO:0032501//multicellular organismal process;GO:0044707//single-multicellular organism process;GO:0007417//central nervous system development;GO:0044767//single-organism developmental process;GO:0048856//anatomical structure development;GO:0003012//muscle system process;GO:0044699//single-or…
XP_005889457	0	875.117	0.001	7.07667	12.7889	4.57e-07	0.00053331	up	SVIL	PREDICTED: LOW QUALITY PROTEIN: supervillin [Bos mutus]	-	-	-	-	GO:0044444//cytoplasmic part;GO:0044464//cell part;GO:0005737//cytoplasm;GO:0043232//intracellular non-membrane-bounded organelle;GO:0043231//intracellular membrane-bounded organelle;GO:0043229//intracellular organelle;GO:0044424//intracellular part;GO:0005856//cytoskeleton;GO:0043228//non-membrane-bounded organelle;GO:0030016//myofibril;GO:0005622//intracellular;GO:0005912//adherens junction;GO:…	GO:0005488//binding;GO:0005515//protein binding;GO:0008092//cytoskeletal protein binding;GO:0003779//actin binding	GO:0006996//organelle organization;GO:0009987//cellular process;GO:0048856//anatomical structure development;GO:0060537//muscle tissue development;GO:0016043//cellular component organization;GO:0009888//tissue development;GO:0014706//striated muscle tissue development;GO:0071840//cellular component organization or biogenesis;GO:0032502//developmental process
XP_014335159	0	353.17	0.001	7.02667	12.7786	1.03e-05	0.00596384	up	TRPC4AP	PREDICTED: short transient receptor potential channel 4-associated protein isoform X2 [Ovis aries]	-	-	-	-	GO:0032991//macromolecular complex;GO:0005623//cell;GO:0044424//intracellular part;GO:0005622//intracellular;GO:0043234//protein complex;GO:0044464//cell part;GO:1902494//catalytic complex;GO:0080008//Cul4-RING E3 ubiquitin ligase complex;GO:0031461//cullin-RING ubiquitin ligase complex;GO:1990234//transferase complex;GO:0000151//ubiquitin ligase complex	GO:0005515//protein binding;GO:0005488//binding;GO:0019899//enzyme binding	GO:0044260//cellular macromolecule metabolic process;GO:0043170//macromolecule metabolic process;GO:0019538//protein metabolic process;GO:0071704//organic substance metabolic process;GO:0006464//cellular protein modification process;GO:0044237//cellular metabolic process;GO:0070647//protein modification by small protein conjugation or removal;GO:0009987//cellular process;GO:0043412//macromolecule…
XP_005898682	0	14.72	0.001	6.93	12.7586	0.0431053	0.521023	no	ATP5J	PREDICTED: ATP synthase-coupling factor 6, mitochondrial isoform X1 [Bos mutus]	Metabolism	Energy metabolism	ko00190//Oxidative phosphorylation	K02131	GO:0031090//organelle membrane;GO:0044422//organelle part;GO:0043231//intracellular membrane-bounded organelle;GO:0043227//membrane-bounded organelle;GO:0005623//cell;GO:0043229//intracellular organelle;GO:0098796//membrane protein complex;GO:0031975//envelope;GO:0016469//proton-transporting two-sector ATPase complex;GO:0033177//proton-transporting two-sector ATPase complex, proton-transporting d…	GO:0016787//hydrolase activity;GO:0017111//nucleoside-triphosphatase activity;GO:0022857//transmembrane transporter activity;GO:0008324//cation transmembrane transporter activity;GO:0022891//substrate-specific transmembrane transporter activity;GO:0022890//inorganic cation transmembrane transporter activity;GO:0016817//hydrolase activity, acting on acid anhydrides;GO:0003824//catalytic activity;G…	GO:1901657//glycosyl compound metabolic process;GO:0009141//nucleoside triphosphate metabolic process;GO:0009201//ribonucleoside triphosphate biosynthetic process;GO:0044707//single-multicellular organism process;GO:0009150//purine ribonucleotide metabolic process;GO:0006753//nucleoside phosphate metabolic process;GO:0006807//nitrogen compound metabolic process;GO:0009199//ribonucleoside triphosp…
XP_014334482	0	138.493	0.001	6.76	12.7228	9.17e-07	0.000983824	up	CDC20	PREDICTED: cell division cycle protein 20 homolog isoform X1 [Bos taurus]	Genetic Information Processing;Cellular Processes	Folding, sorting and degradation;Cell growth and death	ko04120//Ubiquitin mediated proteolysis;ko04114//Oocyte meiosis;ko04110//Cell cycle	K03363	GO:0015630//microtubule cytoskeleton;GO:0043233//organelle lumen;GO:0043228//non-membrane-bounded organelle;GO:0000151//ubiquitin ligase complex;GO:0044428//nuclear part;GO:0043234//protein complex;GO:0005856//cytoskeleton;GO:0031974//membrane-enclosed lumen;GO:0005623//cell;GO:0044446//intracellular organelle part;GO:0044422//organelle part;GO:1990234//transferase complex;GO:1902494//catalytic c…	GO:0044877//macromolecular complex binding;GO:0098772//molecular function regulator;GO:0055103//ligase regulator activity;GO:0005488//binding;GO:0032403//protein complex binding;GO:0055106//ubiquitin-protein transferase regulator activity;GO:0005515//protein binding;GO:0030234//enzyme regulator activity	GO:0044702//single organism reproductive process;GO:0044267//cellular protein metabolic process;GO:0044699//single-organism process;GO:0065009//regulation of molecular function;GO:0051338//regulation of transferase activity;GO:0031398//positive regulation of protein ubiquitination;GO:0050789//regulation of biological process;GO:0048167//regulation of synaptic plasticity;GO:0044763//single-organis…
XP_005898047	0	37.1567	0.001	6.65333	12.6999	0.00194539	0.156642	no	LASP1	PREDICTED: LIM and SH3 domain protein 1 isoform X2 [Bos mutus]	-	-	-	-	GO:0044421//extracellular region part;GO:0071944//cell periphery;GO:1903561//extracellular vesicle;GO:0043228//non-membrane-bounded organelle;GO:0043226//organelle;GO:0031982//vesicle;GO:0005912//adherens junction;GO:0044424//intracellular part;GO:0043227//membrane-bounded organelle;GO:0030054//cell junction;GO:0043230//extracellular organelle;GO:0070161//anchoring junction;GO:0005622//intracellu…	GO:0046872//metal ion binding;GO:0003779//actin binding;GO:0022892//substrate-specific transporter activity;GO:0043167//ion binding;GO:0046914//transition metal ion binding;GO:0005515//protein binding;GO:0005215//transporter activity;GO:0022857//transmembrane transporter activity;GO:0043169//cation binding;GO:0005488//binding;GO:0008092//cytoskeletal protein binding;GO:0030674//protein binding, b…	GO:0006810//transport;GO:0044700//single organism signaling;GO:0051234//establishment of localization;GO:0050896//response to stimulus;GO:0065007//biological regulation;GO:0007154//cell communication;GO:0050794//regulation of cellular process;GO:0007165//signal transduction;GO:0023052//signaling;GO:0051716//cellular response to stimulus;GO:0009987//cellular process;GO:0006811//ion transport;GO:00…
XP_005900287	0	115.357	0.001	6.50333	12.667	0.00320529	0.192661	no	CD14	PREDICTED: monocyte differentiation antigen CD14 [Bos mutus]	Organismal Systems;Cellular Processes;Environmental Information Processing	Cell motility;Signal transduction;Transport and catabolism;Immune system	ko04010//MAPK signaling pathway;ko04810//Regulation of actin cytoskeleton;ko04145//Phagosome;ko04620//Toll-like receptor signaling pathway;ko04064//NF-kappa B signaling pathway;ko04640//Hematopoietic cell lineage	K04391	GO:0044424//intracellular part;GO:0043229//intracellular organelle;GO:0031224//intrinsic component of membrane;GO:0044421//extracellular region part;GO:0031225//anchored component of membrane;GO:0031226//intrinsic component of plasma membrane;GO:0031982//vesicle;GO:0043230//extracellular organelle;GO:0043227//membrane-bounded organelle;GO:0044464//cell part;GO:0098589//membrane region;GO:0005622/…	GO:0097367//carbohydrate derivative binding;GO:0008289//lipid binding;GO:0005488//binding	GO:0051239//regulation of multicellular organismal process;GO:0050896//response to stimulus;GO:0010033//response to organic substance;GO:0032493//response to bacterial lipoprotein;GO:0070339//response to bacterial lipopeptide;GO:0045088//regulation of innate immune response;GO:0071219//cellular response to molecule of bacterial origin;GO:0007165//signal transduction;GO:0050794//regulation of cell…
XP_014336543	0	423.97	0.001	6.47667	12.661	0.000467978	0.0763588	no	NOMO2	Nodal modulator 1, partial [Bos mutus]	-	-	-	-	-	-	-
XP_005900829	0	43.6967	0.001	6.39333	12.6424	0.0091535	0.297659	no	CCDC107	PREDICTED: coiled-coil domain-containing protein 107 [Bos mutus]	-	-	-	-	GO:0044425//membrane part;GO:0031224//intrinsic component of membrane;GO:0016020//membrane	-	-
XP_005908518	0	134.51	0.001	6.39333	12.6424	4.76e-08	8.62e-05	up	SLC25A25	PREDICTED: calcium-binding mitochondrial carrier protein SCaMC-2 isoform X1 [Bos mutus]	-	-	-	-	-	-	-
XP_005900714	0	526.273	0.001	6.34	12.6303	0.0003357	0.0653372	no	TEX14	PREDICTED: inactive serine/threonine-protein kinase TEX14-like isoform X2 [Bos mutus]	-	-	-	-	GO:0005623//cell;GO:0043227//membrane-bounded organelle;GO:0044427//chromosomal part;GO:0044424//intracellular part;GO:0043229//intracellular organelle;GO:0031982//vesicle;GO:0044422//organelle part;GO:0000793//condensed chromosome;GO:0043226//organelle;GO:0044421//extracellular region part;GO:0044446//intracellular organelle part;GO:0043228//non-membrane-bounded organelle;GO:1903561//extracellul…	GO:0097367//carbohydrate derivative binding;GO:0001882//nucleoside binding;GO:0016772//transferase activity, transferring phosphorus-containing groups;GO:0036094//small molecule binding;GO:0032550//purine ribonucleoside binding;GO:0005488//binding;GO:0001883//purine nucleoside binding;GO:1901363//heterocyclic compound binding;GO:0003824//catalytic activity;GO:0019899//enzyme binding;GO:0019900//k…	GO:0043412//macromolecule modification;GO:0071704//organic substance metabolic process;GO:0019538//protein metabolic process;GO:1903046//meiotic cell cycle process;GO:0044702//single organism reproductive process;GO:0044699//single-organism process;GO:0000910//cytokinesis;GO:0044238//primary metabolic process;GO:0000070//mitotic sister chromatid segregation;GO:0036211//protein modification proces…
XP_014332976	0	29.5167	0.001	6.27	12.6142	0.00367554	0.203998	no	LOC102271141	Serine/arginine-rich splicing factor 10, partial [Bos mutus]	Genetic Information Processing	Transcription	ko03040//Spliceosome	K12900	GO:0043229//intracellular organelle;GO:0044464//cell part;GO:0043227//membrane-bounded organelle;GO:0043231//intracellular membrane-bounded organelle;GO:0043233//organelle lumen;GO:0031981//nuclear lumen;GO:0044451//nucleoplasm part;GO:0043226//organelle;GO:0005623//cell;GO:0005622//intracellular;GO:0044424//intracellular part;GO:0016604//nuclear body;GO:0031974//membrane-enclosed lumen;GO:004442…	GO:0019904//protein domain specific binding;GO:0005515//protein binding;GO:0003676//nucleic acid binding;GO:0003723//RNA binding;GO:0097159//organic cyclic compound binding;GO:0005488//binding;GO:1901363//heterocyclic compound binding	GO:0006913//nucleocytoplasmic transport;GO:0071702//organic substance transport;GO:0006397//mRNA processing;GO:0022618//ribonucleoprotein complex assembly;GO:0019438//aromatic compound biosynthetic process;GO:0006403//RNA localization;GO:0050657//nucleic acid transport;GO:0018130//heterocycle biosynthetic process;GO:0015931//nucleobase-containing compound transport;GO:0009987//cellular process;GO…
XP_014331801	0	383.023	0.001	6.24333	12.6081	0.000541474	0.0824861	no	CCDC40	PREDICTED: coiled-coil domain-containing protein 40 [Bos mutus]	-	-	-	-	-	-	-
XP_005902548	0	94.9633	0.001	6.22	12.6027	0.0041222	0.216839	no	BSPRY	PREDICTED: B box and SPRY domain-containing protein [Bos mutus]	-	-	-	-	-	GO:0046914//transition metal ion binding;GO:0043169//cation binding;GO:0005488//binding;GO:0043167//ion binding;GO:0046872//metal ion binding	-
XM_005891782	0	86.2433	0.001	6.17667	12.5926	1.94e-06	0.001788	up	ETFA	PREDICTED: Bos mutus electron-transfer-flavoprotein, alpha polypeptide (ETFA), transcript variant X2, mRNA	-	-	-	-	-	-	-
XP_005887894	0	79.5933	0.001	6.16	12.5887	0.00529486	0.242585	no	ROGDI	PREDICTED: protein rogdi homolog [Bos mutus]	-	-	-	-	GO:0044464//cell part;GO:0043226//organelle;GO:0012505//endomembrane system;GO:0043231//intracellular membrane-bounded organelle;GO:0005622//intracellular;GO:0005623//cell;GO:0043229//intracellular organelle;GO:0044424//intracellular part;GO:0043227//membrane-bounded organelle	-	GO:0032502//developmental process;GO:0007417//central nervous system development;GO:0008283//cell proliferation;GO:0048534//hematopoietic or lymphoid organ development;GO:0002520//immune system development;GO:0009653//anatomical structure morphogenesis;GO:0002376//immune system process;GO:0007399//nervous system development;GO:0044699//single-organism process;GO:0009887//animal organ morphogenesi…
XP_014338952	0	499.277	0.001	6.15333	12.5872	1.58e-05	0.00831126	up	IFT140	PREDICTED: intraflagellar transport protein 140 homolog [Bos mutus]	-	-	-	-	GO:0005929//cilium;GO:0044424//intracellular part;GO:0043228//non-membrane-bounded organelle;GO:0044464//cell part;GO:0005815//microtubule organizing center;GO:0031513//nonmotile primary cilium;GO:0042995//cell projection;GO:0015630//microtubule cytoskeleton;GO:0044430//cytoskeletal part;GO:0005856//cytoskeleton;GO:0043232//intracellular non-membrane-bounded organelle;GO:0044422//organelle part;G…	-	GO:0007165//signal transduction;GO:0030030//cell projection organization;GO:0044767//single-organism developmental process;GO:0007166//cell surface receptor signaling pathway;GO:0032990//cell part morphogenesis;GO:0070727//cellular macromolecule localization;GO:0007224//smoothened signaling pathway;GO:0044782//cilium organization;GO:0048731//system development;GO:0032989//cellular component morph…
XP_005894997	0	38.71	0.001	6.08667	12.5714	0.000214018	0.0520677	no	SCNM1	sodium channel modifier 1 [Bos taurus]	-	-	-	-	GO:0043229//intracellular organelle;GO:0031981//nuclear lumen;GO:0005654//nucleoplasm;GO:0005623//cell;GO:0043231//intracellular membrane-bounded organelle;GO:0044424//intracellular part;GO:0043233//organelle lumen;GO:0044428//nuclear part;GO:0044451//nucleoplasm part;GO:0044446//intracellular organelle part;GO:0044464//cell part;GO:0043226//organelle;GO:0016604//nuclear body;GO:0005634//nucleus;…	GO:0043167//ion binding;GO:0005515//protein binding;GO:0005488//binding;GO:0043169//cation binding	GO:0006807//nitrogen compound metabolic process;GO:0006396//RNA processing;GO:0009987//cellular process;GO:0016070//RNA metabolic process;GO:0008152//metabolic process;GO:0071704//organic substance metabolic process;GO:0044237//cellular metabolic process;GO:0046483//heterocycle metabolic process;GO:1901360//organic cyclic compound metabolic process;GO:0090304//nucleic acid metabolic process;GO:00…
XP_014333542	0	833.13	0.001	6.02	12.5555	0.000184944	0.0466197	up	WNK1	PREDICTED: serine/threonine-protein kinase WNK1 isoform X13 [Bos taurus]	-	-	-	-	-	-	-
XP_005910258	0.01	119.243	0.001	5.92	12.5314	0.000175866	0.0457514	up	ABHD2	abhydrolase domain-containing protein 2 [Bos taurus]	-	-	-	-	GO:0044425//membrane part;GO:0031514//motile cilium;GO:0005929//cilium;GO:0016020//membrane;GO:0005886//plasma membrane;GO:0071944//cell periphery;GO:0042995//cell projection;GO:0043226//organelle;GO:0031224//intrinsic component of membrane;GO:0005623//cell;GO:0044464//cell part	GO:0005488//binding;GO:0016787//hydrolase activity;GO:0016298//lipase activity;GO:0003824//catalytic activity;GO:0016788//hydrolase activity, acting on ester bonds	GO:0050794//regulation of cellular process;GO:0051674//localization of cell;GO:0050896//response to stimulus;GO:0070887//cellular response to chemical stimulus;GO:0042221//response to chemical;GO:0006638//neutral lipid metabolic process;GO:0044710//single-organism metabolic process;GO:0048545//response to steroid hormone;GO:0014070//response to organic cyclic compound;GO:0006950//response to stre…
XP_005890604	0.0166667	68.55	0.001	5.89	12.5241	2.99e-05	0.013912	up	NFKBIB	PREDICTED: NF-kappa-B inhibitor beta [Bos mutus]	Organismal Systems	Endocrine system;Immune system;Nervous system	ko04062//Chemokine signaling pathway;ko04722//Neurotrophin signaling pathway;ko04660//T cell receptor signaling pathway;ko04920//Adipocytokine signaling pathway;ko04622//RIG-I-like receptor signaling pathway;ko04662//B cell receptor signaling pathway;ko04621//NOD-like receptor signaling pathway;ko04623//Cytosolic DNA-sensing pathway	K02581	-	-	-
XP_005905993	0	152.12	0.001	5.87667	12.5208	0.000208221	0.051371	no	API5	PREDICTED: LOW QUALITY PROTEIN: apoptosis inhibitor 5 [Bos mutus]	-	-	-	-	GO:0044422//organelle part;GO:0044464//cell part;GO:0005622//intracellular;GO:0044424//intracellular part;GO:0005623//cell;GO:0043226//organelle;GO:0044428//nuclear part;GO:1990904//ribonucleoprotein complex;GO:0043231//intracellular membrane-bounded organelle;GO:0044446//intracellular organelle part;GO:0005634//nucleus;GO:0070013//intracellular organelle lumen;GO:0031981//nuclear lumen;GO:003197…	GO:0097159//organic cyclic compound binding;GO:0005515//protein binding;GO:0019838//growth factor binding;GO:0003676//nucleic acid binding;GO:0005488//binding;GO:0003723//RNA binding;GO:1901363//heterocyclic compound binding	GO:0065007//biological regulation;GO:0010941//regulation of cell death;GO:0050789//regulation of biological process;GO:0042981//regulation of apoptotic process;GO:0060548//negative regulation of cell death;GO:0050794//regulation of cellular process;GO:0048523//negative regulation of cellular process;GO:0043069//negative regulation of programmed cell death;GO:0048519//negative regulation of biolog…
XP_005896736	0	165.303	0.001	5.81333	12.5051	9.99e-05	0.031996	up	UTP6	PREDICTED: U3 small nucleolar RNA-associated protein 6 homolog [Bos mutus]	Genetic Information Processing	Translation	ko03008//Ribosome biogenesis in eukaryotes	K14557	-	-	-
XP_005905346	0.01	64.8967	0.001	5.75667	12.491	0.0053609	0.243141	no	CEP41	centrosomal protein of 41 kDa [Bos taurus]	-	-	-	-	-	-	-
XP_005891383	0	314.483	0.001	5.74	12.4868	0.000717624	0.0947516	no	KIAA1324	PREDICTED: UPF0577 protein KIAA1324 homolog isoform X1 [Bos mutus]	-	-	-	-	GO:0016020//membrane;GO:0031982//vesicle;GO:0005737//cytoplasm;GO:0043229//intracellular organelle;GO:0044425//membrane part;GO:0044424//intracellular part;GO:0044444//cytoplasmic part;GO:0005576//extracellular region;GO:1903561//extracellular vesicle;GO:0043227//membrane-bounded organelle;GO:0005622//intracellular;GO:0044464//cell part;GO:0071944//cell periphery;GO:0012505//endomembrane system;G…	GO:0003723//RNA binding;GO:1901363//heterocyclic compound binding;GO:0005488//binding;GO:0097159//organic cyclic compound binding;GO:0003676//nucleic acid binding	GO:0051716//cellular response to stimulus;GO:0050789//regulation of biological process;GO:0097190//apoptotic signaling pathway;GO:0038034//signal transduction in absence of ligand;GO:0010508//positive regulation of autophagy;GO:0006996//organelle organization;GO:0065007//biological regulation;GO:0012501//programmed cell death;GO:0071840//cellular component organization or biogenesis;GO:0016241//r…
XP_005908676	0	69.7667	0.001	5.74	12.4868	0.00636929	0.262057	no	PSMG1	PREDICTED: proteasome assembly chaperone 1 isoform X1 [Bos mutus]	-	-	-	-	-	-	-
XP_005909435	0	287.03	0.001	5.53667	12.4348	0.000828851	0.0998993	no	USP4	PREDICTED: ubiquitin carboxyl-terminal hydrolase 4 isoform X1 [Bos mutus]	-	-	-	-	-	-	-
XP_005887579	0	104.33	0.001	5.51667	12.4296	0.00362043	0.202829	no	SEC14L2	SEC14-like protein 2 [Bos taurus]	-	-	-	-	GO:0031224//intrinsic component of membrane;GO:0016020//membrane;GO:0043231//intracellular membrane-bounded organelle;GO:0044464//cell part;GO:0005623//cell;GO:0044425//membrane part;GO:0043229//intracellular organelle;GO:0005622//intracellular;GO:0043226//organelle;GO:0044424//intracellular part;GO:0043227//membrane-bounded organelle	GO:0005488//binding	GO:1901362//organic cyclic compound biosynthetic process;GO:0008152//metabolic process;GO:0010467//gene expression;GO:0043170//macromolecule metabolic process;GO:0016070//RNA metabolic process;GO:0018130//heterocycle biosynthetic process;GO:0044238//primary metabolic process;GO:0009987//cellular process;GO:0006139//nucleobase-containing compound metabolic process;GO:0044271//cellular nitrogen com…
XP_005905560	0	113.773	0.001	5.43667	12.4085	0.00242702	0.170863	no	MAK	PREDICTED: serine/threonine-protein kinase MAK isoform X2 [Bos mutus]	-	-	-	-	GO:0005623//cell;GO:0044430//cytoskeletal part;GO:0044424//intracellular part;GO:0005856//cytoskeleton;GO:0005622//intracellular;GO:0097458//neuron part;GO:0042995//cell projection;GO:0031513//nonmotile primary cilium;GO:0043232//intracellular non-membrane-bounded organelle;GO:0005819//spindle;GO:0072372//primary cilium;GO:0044464//cell part;GO:0043226//organelle;GO:0044422//organelle part;GO:001…	GO:0016740//transferase activity;GO:0032550//purine ribonucleoside binding;GO:0097159//organic cyclic compound binding;GO:0001882//nucleoside binding;GO:0016301//kinase activity;GO:0097367//carbohydrate derivative binding;GO:0003712//transcription cofactor activity;GO:0001883//purine nucleoside binding;GO:0000989//transcription factor activity, transcription factor binding;GO:0016773//phosphotran…	GO:0034654//nucleobase-containing compound biosynthetic process;GO:0048871//multicellular organismal homeostasis;GO:0043170//macromolecule metabolic process;GO:0006464//cellular protein modification process;GO:0060249//anatomical structure homeostasis;GO:0006725//cellular aromatic compound metabolic process;GO:0009059//macromolecule biosynthetic process;GO:0001895//retina homeostasis;GO:0016070//…
XP_005900214	0	693.043	0.001	5.43333	12.4076	8.92e-06	0.00544819	up	ZNF318	PREDICTED: zinc finger protein 318 [Bos mutus]	-	-	-	-	GO:0043233//organelle lumen;GO:0044428//nuclear part;GO:0044424//intracellular part;GO:0043229//intracellular organelle;GO:0070013//intracellular organelle lumen;GO:0005622//intracellular;GO:0005634//nucleus;GO:0044422//organelle part;GO:0031981//nuclear lumen;GO:0005623//cell;GO:0031974//membrane-enclosed lumen;GO:0043226//organelle;GO:0043231//intracellular membrane-bounded organelle;GO:0044446…	GO:0043169//cation binding;GO:0046914//transition metal ion binding;GO:0043167//ion binding;GO:0005488//binding;GO:0046872//metal ion binding	-
XP_005905220	0	120.583	0.001	5.32333	12.3781	0.000161896	0.0434063	up	FUCA1	PREDICTED: tissue alpha-L-fucosidase [Bos mutus]	Metabolism	Glycan biosynthesis and metabolism	ko00511//Other glycan degradation	K01206	GO:0000323//lytic vacuole;GO:0043231//intracellular membrane-bounded organelle;GO:0044424//intracellular part;GO:0031982//vesicle;GO:0043230//extracellular organelle;GO:0005764//lysosome;GO:0005737//cytoplasm;GO:1903561//extracellular vesicle;GO:0005623//cell;GO:0044444//cytoplasmic part;GO:0005576//extracellular region;GO:0044421//extracellular region part;GO:0043229//intracellular organelle;GO:…	GO:0004553//hydrolase activity, hydrolyzing O-glycosyl compounds;GO:0016798//hydrolase activity, acting on glycosyl bonds;GO:0005488//binding;GO:0016787//hydrolase activity;GO:0015928//fucosidase activity;GO:0003824//catalytic activity	GO:0044238//primary metabolic process;GO:1901575//organic substance catabolic process;GO:0044723//single-organism carbohydrate metabolic process;GO:0008152//metabolic process;GO:0009057//macromolecule catabolic process;GO:0016137//glycoside metabolic process;GO:0043170//macromolecule metabolic process;GO:0009056//catabolic process;GO:1901657//glycosyl compound metabolic process;GO:0005975//carboh…
XP_014339084	0	319.177	0.001	5.29667	12.3709	0.000699578	0.0937827	no	GABBR1	PREDICTED: gamma-aminobutyric acid type B receptor subunit 1 [Bubalus bubalis]	Organismal Systems;Environmental Information Processing	Endocrine system;Signaling molecules and interaction;Signal transduction;Nervous system	ko04080//Neuroactive ligand-receptor interaction;ko04024//cAMP signaling pathway;ko04915//Estrogen signaling pathway;ko04727//GABAergic synapse	K04615	GO:0098797//plasma membrane protein complex;GO:0043234//protein complex;GO:0044459//plasma membrane part;GO:0044424//intracellular part;GO:0031226//intrinsic component of plasma membrane;GO:0032991//macromolecular complex;GO:0005886//plasma membrane;GO:0005623//cell;GO:0031224//intrinsic component of membrane;GO:0044464//cell part;GO:0098796//membrane protein complex;GO:0098802//plasma membrane r…	GO:0004888//transmembrane signaling receptor activity;GO:0004872//receptor activity;GO:0038023//signaling receptor activity;GO:0004871//signal transducer activity;GO:0004930//G-protein coupled receptor activity;GO:0099600//transmembrane receptor activity;GO:0060089//molecular transducer activity	GO:0007188//adenylate cyclase-modulating G-protein coupled receptor signaling pathway;GO:0007187//G-protein coupled receptor signaling pathway, coupled to cyclic nucleotide second messenger;GO:0050789//regulation of biological process;GO:0007186//G-protein coupled receptor signaling pathway;GO:0050896//response to stimulus;GO:0044763//single-organism cellular process;GO:0050794//regulation of cel…
XP_005901579	0	114.783	0.001	5.27	12.3636	2.05e-07	0.000263332	up	FUT11	PREDICTED: alpha-(1,3)-fucosyltransferase 11 [Bos mutus]	-	-	-	-	GO:1903561//extracellular vesicle;GO:0005576//extracellular region;GO:0016020//membrane;GO:0000139//Golgi membrane;GO:0044421//extracellular region part;GO:0044431//Golgi apparatus part;GO:0043227//membrane-bounded organelle;GO:0012505//endomembrane system;GO:0043229//intracellular organelle;GO:0005623//cell;GO:0044425//membrane part;GO:0005794//Golgi apparatus;GO:0044464//cell part;GO:0043226//o…	GO:0016740//transferase activity;GO:0016757//transferase activity, transferring glycosyl groups;GO:0008417//fucosyltransferase activity;GO:0003824//catalytic activity;GO:0016758//transferase activity, transferring hexosyl groups	GO:0044237//cellular metabolic process;GO:0044723//single-organism carbohydrate metabolic process;GO:0006464//cellular protein modification process;GO:0070085//glycosylation;GO:0005975//carbohydrate metabolic process;GO:0009987//cellular process;GO:0036211//protein modification process;GO:0019538//protein metabolic process;GO:0043170//macromolecule metabolic process;GO:0044710//single-organism me…
XP_005902179	0.00333333	86.53	0.001	5.26	12.3608	0.00475936	0.230492	no	PCBP2	poly(rC)-binding protein 2 isoform e [Homo sapiens]	-	-	-	-	GO:0044446//intracellular organelle part;GO:0044422//organelle part;GO:0005634//nucleus;GO:0005576//extracellular region;GO:0044424//intracellular part;GO:0044428//nuclear part;GO:0043227//membrane-bounded organelle;GO:0044444//cytoplasmic part;GO:0044421//extracellular region part;GO:0005622//intracellular;GO:0043230//extracellular organelle;GO:0043233//organelle lumen;GO:0031974//membrane-enclo…	GO:0003676//nucleic acid binding;GO:0005515//protein binding;GO:0097159//organic cyclic compound binding;GO:0019899//enzyme binding;GO:1901363//heterocyclic compound binding;GO:0003697//single-stranded DNA binding;GO:0003723//RNA binding;GO:0005488//binding;GO:0003677//DNA binding;GO:0044389//ubiquitin-like protein ligase binding	GO:0044248//cellular catabolic process;GO:0019941//modification-dependent protein catabolic process;GO:0044257//cellular protein catabolic process;GO:0044260//cellular macromolecule metabolic process;GO:0009058//biosynthetic process;GO:0051603//proteolysis involved in cellular protein catabolic process;GO:0002183//cytoplasmic translational initiation;GO:0010467//gene expression;GO:1901564//organo…
XP_005910248	0	90.2767	0.001	5.25667	12.3599	0.000321787	0.0639969	no	SERPINB5	PREDICTED: serpin B5 isoform X1 [Bos mutus]	Cellular Processes	Cell growth and death	ko04115//p53 signaling pathway	K10139	-	-	-
XM_014483200	0	173.217	0.001	5.05667	12.304	0.00130278	0.130901	no	ALDH1A2	PREDICTED: Bos mutus aldehyde dehydrogenase 1 family, member A2 (ALDH1A2), transcript variant X3, mRNA	Metabolism	Metabolism of cofactors and vitamins	ko00830//Retinol metabolism	K07249	GO:0044424//intracellular part;GO:0005623//cell;GO:0044464//cell part;GO:0005622//intracellular	GO:0003824//catalytic activity;GO:0016620//oxidoreductase activity, acting on the aldehyde or oxo group of donors, NAD or NADP as acceptor;GO:0016491//oxidoreductase activity;GO:0016903//oxidoreductase activity, acting on the aldehyde or oxo group of donors	GO:0043170//macromolecule metabolic process;GO:0044238//primary metabolic process;GO:0048729//tissue morphogenesis;GO:0048856//anatomical structure development;GO:0006082//organic acid metabolic process;GO:0048731//system development;GO:0072358//cardiovascular system development;GO:0030326//embryonic limb morphogenesis;GO:0048736//appendage development;GO:0072359//circulatory system development;G…
XP_005904573	0	331.433	0.001	5.04667	12.3011	0.000662771	0.0921296	no	FNDC3A	PREDICTED: fibronectin type-III domain-containing protein 3A isoform X1 [Bos mutus]	-	-	-	-	GO:0043226//organelle;GO:0044424//intracellular part;GO:0043229//intracellular organelle;GO:0005737//cytoplasm;GO:0044444//cytoplasmic part;GO:0043227//membrane-bounded organelle;GO:0031224//intrinsic component of membrane;GO:0016020//membrane;GO:0005623//cell;GO:0031090//organelle membrane;GO:0043231//intracellular membrane-bounded organelle;GO:0044425//membrane part;GO:0044464//cell part;GO:000…	GO:0003676//nucleic acid binding;GO:0097159//organic cyclic compound binding;GO:1901363//heterocyclic compound binding;GO:0003723//RNA binding;GO:0005488//binding	GO:0044703//multi-organism reproductive process;GO:0032501//multicellular organismal process;GO:0098602//single organism cell adhesion;GO:0051704//multi-organism process;GO:0032502//developmental process;GO:0007281//germ cell development;GO:0048609//multicellular organismal reproductive process;GO:0022610//biological adhesion;GO:0009987//cellular process;GO:0002064//epithelial cell development;GO…
XP_014337006	0	40.6367	0.001	4.99667	12.2868	0.000103584	0.0328071	up	LOC102267723	DDB1- and CUL4-associated factor 10 [Myotis davidii]	-	-	-	-	-	-	-
XP_014334262	0	29.4467	0.001	4.97333	12.28	0.00561269	0.247439	no	DCUN1D4	PREDICTED: DCN1-like protein 4 [Pantholops hodgsonii]	-	-	-	-	GO:0005622//intracellular;GO:0005623//cell;GO:0044424//intracellular part;GO:0043227//membrane-bounded organelle;GO:0043229//intracellular organelle;GO:0043226//organelle;GO:0044464//cell part;GO:0043231//intracellular membrane-bounded organelle	GO:0005515//protein binding;GO:0005488//binding	-
XP_005910386	0	1255.27	0.001	4.91667	12.2635	0.000127206	0.0373425	up	DNAH17	PREDICTED: dynein heavy chain 17, axonemal [Bos mutus]	-	-	-	-	GO:0044422//organelle part;GO:0016020//membrane;GO:0044446//intracellular organelle part;GO:0043234//protein complex;GO:0043226//organelle;GO:0005856//cytoskeleton;GO:0044425//membrane part;GO:0015630//microtubule cytoskeleton;GO:0044464//cell part;GO:0044424//intracellular part;GO:0043228//non-membrane-bounded organelle;GO:0043232//intracellular non-membrane-bounded organelle;GO:0044430//cytoske…	GO:0016817//hydrolase activity, acting on acid anhydrides;GO:0001882//nucleoside binding;GO:0097367//carbohydrate derivative binding;GO:0005488//binding;GO:0016787//hydrolase activity;GO:0003824//catalytic activity;GO:0036094//small molecule binding;GO:0097159//organic cyclic compound binding;GO:0032550//purine ribonucleoside binding;GO:0001883//purine nucleoside binding;GO:0032549//ribonucleosid…	GO:0044763//single-organism cellular process;GO:0007017//microtubule-based process;GO:0009987//cellular process;GO:0044699//single-organism process
XP_014332915	0	51.06	0.001	4.91667	12.2635	0.00985075	0.305402	no	MRPS15	28S ribosomal protein S15, mitochondrial [Bos mutus]	Genetic Information Processing	Translation	ko03010//Ribosome	K02956	GO:0043227//membrane-bounded organelle;GO:0032991//macromolecular complex;GO:0015935//small ribosomal subunit;GO:0005635//nuclear envelope;GO:0044428//nuclear part;GO:0043226//organelle;GO:0031090//organelle membrane;GO:0005737//cytoplasm;GO:0031967//organelle envelope;GO:0016020//membrane;GO:0012505//endomembrane system;GO:0044444//cytoplasmic part;GO:0000313//organellar ribosome;GO:0005623//cel…	GO:0003723//RNA binding;GO:0003676//nucleic acid binding;GO:1901363//heterocyclic compound binding;GO:0005198//structural molecule activity;GO:0097159//organic cyclic compound binding;GO:0005488//binding	GO:0043604//amide biosynthetic process;GO:0071704//organic substance metabolic process;GO:0034645//cellular macromolecule biosynthetic process;GO:0043043//peptide biosynthetic process;GO:0044271//cellular nitrogen compound biosynthetic process;GO:1901576//organic substance biosynthetic process;GO:0043170//macromolecule metabolic process;GO:0009058//biosynthetic process;GO:1901564//organonitrogen …
XP_005888115	0	63.37	0.001	4.88333	12.2537	0.00730341	0.274106	no	ACTR1A	PREDICTED: alpha-centractin isoform X3 [Trichechus manatus latirostris]	-	-	-	-	GO:0043228//non-membrane-bounded organelle;GO:0005576//extracellular region;GO:0044421//extracellular region part;GO:0099081//supramolecular polymer;GO:0032991//macromolecular complex;GO:0005737//cytoplasm;GO:0044444//cytoplasmic part;GO:0043227//membrane-bounded organelle;GO:0043230//extracellular organelle;GO:0044430//cytoskeletal part;GO:0043229//intracellular organelle;GO:0044464//cell part;G…	GO:0005488//binding;GO:0001882//nucleoside binding;GO:0032550//purine ribonucleoside binding;GO:0032549//ribonucleoside binding;GO:0036094//small molecule binding;GO:0097159//organic cyclic compound binding;GO:0097367//carbohydrate derivative binding;GO:0001883//purine nucleoside binding;GO:1901363//heterocyclic compound binding	GO:0006810//transport;GO:0048002//antigen processing and presentation of peptide antigen;GO:0019884//antigen processing and presentation of exogenous antigen;GO:0002478//antigen processing and presentation of exogenous peptide antigen;GO:0002376//immune system process;GO:0051179//localization;GO:0019882//antigen processing and presentation;GO:0051234//establishment of localization
XP_005911184	0	93.56	0.001	4.87	12.2497	1.34e-05	0.00751119	up	LOC102278138	PREDICTED: alpha-1,3-mannosyl-glycoprotein 4-beta-N-acetylglucosaminyltransferase C-like [Bos mutus]	-	-	-	-	GO:0031224//intrinsic component of membrane;GO:0016020//membrane;GO:0044425//membrane part	GO:0003824//catalytic activity;GO:0016757//transferase activity, transferring glycosyl groups;GO:0016740//transferase activity	GO:0008152//metabolic process;GO:0044238//primary metabolic process
XP_005887149	0	135.857	0.001	4.86667	12.2487	0.00249173	0.173202	no	ST7L	PREDICTED: suppressor of tumorigenicity 7 protein-like isoform X1 [Bos mutus]	-	-	-	-	GO:0016020//membrane;GO:0031224//intrinsic component of membrane;GO:0044425//membrane part	-	GO:0044699//single-organism process;GO:0044763//single-organism cellular process;GO:0040007//growth;GO:0009987//cellular process;GO:0016049//cell growth
XP_005901495	0	121.687	0.001	4.79667	12.2278	3.5e-06	0.0026252	up	HBP1	HMG box-containing protein 1 [Bos taurus]	-	-	-	-	GO:0031974//membrane-enclosed lumen;GO:0044422//organelle part;GO:0005623//cell;GO:0043227//membrane-bounded organelle;GO:0044464//cell part;GO:0043229//intracellular organelle;GO:0043226//organelle;GO:0043231//intracellular membrane-bounded organelle;GO:0044424//intracellular part;GO:0043233//organelle lumen;GO:0044428//nuclear part;GO:0031981//nuclear lumen;GO:0005622//intracellular;GO:0070013/…	GO:0005488//binding;GO:0097159//organic cyclic compound binding;GO:1901363//heterocyclic compound binding;GO:0003676//nucleic acid binding	GO:1901576//organic substance biosynthetic process;GO:0050896//response to stimulus;GO:0097659//nucleic acid-templated transcription;GO:0071704//organic substance metabolic process;GO:0044260//cellular macromolecule metabolic process;GO:0006725//cellular aromatic compound metabolic process;GO:0044763//single-organism cellular process;GO:0010467//gene expression;GO:0046483//heterocycle metabolic p…
XM_005907105	0	95.2133	0.001	4.78667	12.2248	0.000531845	0.0817207	no	ILK	PREDICTED: Bos mutus integrin-linked kinase (ILK), transcript variant X3, mRNA	Organismal Systems;Cellular Processes	Endocrine system;Cellular commiunity	ko04510//Focal adhesion;ko03320//PPAR signaling pathway	K06272	GO:0036477//somatodendritic compartment;GO:0070013//intracellular organelle lumen;GO:0043227//membrane-bounded organelle;GO:0043292//contractile fiber;GO:0044464//cell part;GO:0044424//intracellular part;GO:0043226//organelle;GO:0043228//non-membrane-bounded organelle;GO:0030424//axon;GO:0031974//membrane-enclosed lumen;GO:0030055//cell-substrate junction;GO:0043233//organelle lumen;GO:0097458//n…	GO:0016740//transferase activity;GO:0036094//small molecule binding;GO:0019904//protein domain specific binding;GO:0005102//receptor binding;GO:1901363//heterocyclic compound binding;GO:0019899//enzyme binding;GO:0016301//kinase activity;GO:0016772//transferase activity, transferring phosphorus-containing groups;GO:0032549//ribonucleoside binding;GO:0001883//purine nucleoside binding;GO:0019900//…	GO:0019220//regulation of phosphate metabolic process;GO:0001933//negative regulation of protein phosphorylation;GO:0048754//branching morphogenesis of an epithelial tube;GO:0001763//morphogenesis of a branching structure;GO:0051171//regulation of nitrogen compound metabolic process;GO:0001558//regulation of cell growth;GO:0007599//hemostasis;GO:0007507//heart development;GO:0071772//response to …
XP_005897245	0	364.69	0.001	4.74667	12.2127	0.000577182	0.0854392	no	CEP164	PREDICTED: LOW QUALITY PROTEIN: centrosomal protein of 164 kDa [Bos mutus]	-	-	-	-	GO:0043228//non-membrane-bounded organelle;GO:0044424//intracellular part;GO:0031981//nuclear lumen;GO:0015630//microtubule cytoskeleton;GO:0043226//organelle;GO:0005813//centrosome;GO:0043227//membrane-bounded organelle;GO:0005623//cell;GO:0043233//organelle lumen;GO:0044446//intracellular organelle part;GO:0070013//intracellular organelle lumen;GO:0044430//cytoskeletal part;GO:0005622//intracel…	-	GO:0009653//anatomical structure morphogenesis;GO:0032989//cellular component morphogenesis;GO:0044763//single-organism cellular process;GO:0071840//cellular component organization or biogenesis;GO:0022607//cellular component assembly;GO:0048646//anatomical structure formation involved in morphogenesis;GO:0044767//single-organism developmental process;GO:0032502//developmental process;GO:0048856/…
XP_005910351	0.00333333	200.97	0.001	4.7	12.1984	1.25e-07	0.00018193	up	TGM1	PREDICTED: protein-glutamine gamma-glutamyltransferase K [Bos mutus]	-	-	-	-	GO:0044425//membrane part;GO:0044421//extracellular region part;GO:0005576//extracellular region;GO:0031982//vesicle;GO:0043226//organelle;GO:0043227//membrane-bounded organelle;GO:0016020//membrane;GO:0043230//extracellular organelle;GO:1903561//extracellular vesicle	GO:0005488//binding;GO:0043169//cation binding;GO:0043167//ion binding	GO:0032502//developmental process;GO:0008152//metabolic process;GO:0006464//cellular protein modification process;GO:0044767//single-organism developmental process;GO:0048869//cellular developmental process;GO:0030154//cell differentiation;GO:0043412//macromolecule modification;GO:0071704//organic substance metabolic process;GO:0009913//epidermal cell differentiation;GO:0048856//anatomical struct…
XP_005900508	0	466.93	0.001	4.68	12.1923	0.000405453	0.0703187	no	ARFGEF2	PREDICTED: brefeldin A-inhibited guanine nucleotide-exchange protein 2 [Bos mutus]	Cellular Processes	Transport and catabolism	ko04144//Endocytosis	K18442	-	-	-
XP_005904936	0	107.39	0.001	4.67667	12.1913	0.00349657	0.19929	no	CAP1	PREDICTED: adenylyl cyclase-associated protein 1 isoform X2 [Bos mutus]	-	-	-	-	GO:0015629//actin cytoskeleton;GO:0005856//cytoskeleton;GO:0043227//membrane-bounded organelle;GO:0005622//intracellular;GO:1903561//extracellular vesicle;GO:0043229//intracellular organelle;GO:0043232//intracellular non-membrane-bounded organelle;GO:0044464//cell part;GO:0044424//intracellular part;GO:0030055//cell-substrate junction;GO:0005576//extracellular region;GO:0043228//non-membrane-boun…	GO:0005488//binding;GO:0008092//cytoskeletal protein binding;GO:0005515//protein binding	GO:0048870//cell motility;GO:0006897//endocytosis;GO:0016043//cellular component organization;GO:0040011//locomotion;GO:0044699//single-organism process;GO:0051674//localization of cell;GO:0051234//establishment of localization;GO:0006996//organelle organization;GO:0016192//vesicle-mediated transport;GO:0071840//cellular component organization or biogenesis;GO:0051179//localization;GO:0016477//ce…
XP_005911952	0	110.777	0.001	4.60333	12.1685	0.00338166	0.196398	no	SRRM5	PREDICTED: LOW QUALITY PROTEIN: serine/arginine repetitive matrix 5, partial [Bos mutus]	-	-	-	-	-	-	-
XP_005904811	0	107.717	0.001	4.59667	12.1664	0.00259505	0.176645	no	FASTKD2	PREDICTED: FAST kinase domain-containing protein 2 [Bos mutus]	-	-	-	-	GO:0032991//macromolecular complex;GO:0005737//cytoplasm;GO:0044464//cell part;GO:0043227//membrane-bounded organelle;GO:0005623//cell;GO:0030529//intracellular ribonucleoprotein complex;GO:0043226//organelle;GO:0043231//intracellular membrane-bounded organelle;GO:0005622//intracellular;GO:0044424//intracellular part;GO:0044444//cytoplasmic part;GO:0043229//intracellular organelle;GO:1990904//rib…	GO:0097159//organic cyclic compound binding;GO:0003723//RNA binding;GO:0005488//binding;GO:1901363//heterocyclic compound binding;GO:0003676//nucleic acid binding	GO:0043412//macromolecule modification;GO:0016043//cellular component organization;GO:0008152//metabolic process;GO:0006464//cellular protein modification process;GO:0036211//protein modification process;GO:0043170//macromolecule metabolic process;GO:0065003//macromolecular complex assembly;GO:0000027//ribosomal large subunit assembly;GO:0022613//ribonucleoprotein complex biogenesis;GO:0022618//r…
XP_005904733	0	33.2733	0.001	4.57333	12.159	0.0169475	0.37252	no	CCDC92	PREDICTED: coiled-coil domain-containing protein 92 [Bos mutus]	-	-	-	-	-	-	-
XP_005904677	0	145.713	0.001	4.55333	12.1527	0.00011545	0.0353147	up	DDX41	PREDICTED: probable ATP-dependent RNA helicase DDX41 [Bos mutus]	-	-	-	-	-	-	-
XP_014334223	0	50.1567	0.001	4.53667	12.1474	4.34e-05	0.0174217	up	REXO4	PREDICTED: LOW QUALITY PROTEIN: RNA exonuclease 4 [Bos mutus]	-	-	-	-	GO:0043227//membrane-bounded organelle;GO:0043226//organelle;GO:0044446//intracellular organelle part;GO:0044428//nuclear part;GO:0043231//intracellular membrane-bounded organelle;GO:0044424//intracellular part;GO:0031981//nuclear lumen;GO:0043233//organelle lumen;GO:0044464//cell part;GO:0005634//nucleus;GO:0031974//membrane-enclosed lumen;GO:0044422//organelle part;GO:0005623//cell;GO:0005622//…	GO:0003723//RNA binding;GO:0005488//binding;GO:0003676//nucleic acid binding;GO:1901363//heterocyclic compound binding;GO:0097159//organic cyclic compound binding	-
XP_014336946	0	75.1233	0.001	4.42667	12.112	0.000500447	0.0780684	no	SCAMP2	PREDICTED: secretory carrier-associated membrane protein 2 isoform X1 [Ovis aries]	-	-	-	-	GO:0031982//vesicle;GO:0005794//Golgi apparatus;GO:0044464//cell part;GO:0044437//vacuolar part;GO:1903561//extracellular vesicle;GO:0044444//cytoplasmic part;GO:0044422//organelle part;GO:0005576//extracellular region;GO:0043231//intracellular membrane-bounded organelle;GO:0012505//endomembrane system;GO:0000139//Golgi membrane;GO:0044421//extracellular region part;GO:0044431//Golgi apparatus pa…	-	GO:0033036//macromolecule localization;GO:0051234//establishment of localization;GO:0008104//protein localization;GO:0051179//localization
XP_005897297	0	56.1067	0.001	4.41667	12.1087	0.00110226	0.119185	no	TMEM59	PREDICTED: transmembrane protein 59 isoform X2 [Bos mutus]	-	-	-	-	GO:0044446//intracellular organelle part;GO:0031982//vesicle;GO:0031985//Golgi cisterna;GO:0005794//Golgi apparatus;GO:0005623//cell;GO:0043226//organelle;GO:0005768//endosome;GO:0044424//intracellular part;GO:0005737//cytoplasm;GO:0005622//intracellular;GO:0000323//lytic vacuole;GO:1903561//extracellular vesicle;GO:0005764//lysosome;GO:0043227//membrane-bounded organelle;GO:0044464//cell part;GO…	GO:0003824//catalytic activity;GO:0008233//peptidase activity;GO:0070011//peptidase activity, acting on L-amino acid peptides;GO:0016787//hydrolase activity	GO:0016043//cellular component organization;GO:0090150//establishment of protein localization to membrane;GO:0044763//single-organism cellular process;GO:0005975//carbohydrate metabolic process;GO:0034613//cellular protein localization;GO:0070085//glycosylation;GO:0044723//single-organism carbohydrate metabolic process;GO:1902580//single-organism cellular localization;GO:0044238//primary metaboli…
XP_005897597	0	72.0667	0.001	4.38	12.0967	3.53e-06	0.0026252	up	TACC1	PREDICTED: transforming acidic coiled-coil-containing protein 1 [Bos mutus]	-	-	-	-	-	-	-
XP_005897112	0	96.6433	0.001	4.35	12.0868	1.44e-06	0.00140523	up	RUFY3	PREDICTED: protein RUFY3 isoform X12 [Bos taurus]	-	-	-	-	GO:0043005//neuron projection;GO:0043025//neuronal cell body;GO:0098858//actin-based cell projection;GO:0005622//intracellular;GO:0005623//cell;GO:0044464//cell part;GO:0044297//cell body;GO:0036477//somatodendritic compartment;GO:0031252//cell leading edge;GO:0097458//neuron part;GO:0044424//intracellular part;GO:0042995//cell projection	GO:0043167//ion binding;GO:0005488//binding;GO:0043169//cation binding	GO:0051179//localization;GO:0044707//single-multicellular organism process;GO:0048667//cell morphogenesis involved in neuron differentiation;GO:0051649//establishment of localization in cell;GO:0009653//anatomical structure morphogenesis;GO:0048870//cell motility;GO:0045927//positive regulation of growth;GO:0048812//neuron projection morphogenesis;GO:0048468//cell development;GO:0001558//regulati…
XP_005902181	0	72.4967	0.001	4.34667	12.0857	0.00606965	0.257148	no	PCBP2	poly(rC)-binding protein 2 [Rattus norvegicus]	-	-	-	-	GO:0043231//intracellular membrane-bounded organelle;GO:0005576//extracellular region;GO:0030054//cell junction;GO:0030055//cell-substrate junction;GO:0043226//organelle;GO:0044424//intracellular part;GO:0070161//anchoring junction;GO:0005924//cell-substrate adherens junction;GO:1903561//extracellular vesicle;GO:0043227//membrane-bounded organelle;GO:0031974//membrane-enclosed lumen;GO:0031981//n…	GO:0003677//DNA binding;GO:0019899//enzyme binding;GO:0044389//ubiquitin-like protein ligase binding;GO:0003676//nucleic acid binding;GO:0003697//single-stranded DNA binding;GO:0005515//protein binding;GO:1901363//heterocyclic compound binding;GO:0003723//RNA binding;GO:0097159//organic cyclic compound binding;GO:0005488//binding	GO:0050789//regulation of biological process;GO:1901564//organonitrogen compound metabolic process;GO:0006508//proteolysis;GO:0043603//cellular amide metabolic process;GO:0009059//macromolecule biosynthetic process;GO:0044267//cellular protein metabolic process;GO:0051239//regulation of multicellular organismal process;GO:0002682//regulation of immune system process;GO:0006807//nitrogen compound …
XM_005895557	0	250.55	0.001	4.33	12.0802	9.22e-11	4.82e-07	up	ADAMTS2	PREDICTED: Bos mutus ADAM metallopeptidase with thrombospondin type 1 motif, 2 (ADAMTS2), mRNA	-	-	-	-	GO:0031012//extracellular matrix;GO:0005576//extracellular region;GO:0044421//extracellular region part	GO:0043169//cation binding;GO:0046872//metal ion binding;GO:0008233//peptidase activity;GO:0005488//binding;GO:0043167//ion binding;GO:0016787//hydrolase activity;GO:0003824//catalytic activity;GO:0070011//peptidase activity, acting on L-amino acid peptides;GO:0046914//transition metal ion binding	GO:0044259//multicellular organismal macromolecule metabolic process;GO:0048513//animal organ development;GO:0000003//reproduction;GO:0007276//gamete generation;GO:0051704//multi-organism process;GO:0022414//reproductive process;GO:0048731//system development;GO:0019538//protein metabolic process;GO:0044702//single organism reproductive process;GO:0032501//multicellular organismal process;GO:0071…
XP_005894854	0	67.1	0.001	4.29667	12.069	0.00668237	0.267049	no	EIF4A1	PREDICTED: eukaryotic initiation factor 4A-I isoform X3 [Bos mutus]	Genetic Information Processing	Translation	ko03013//RNA transport	K03257	GO:0043229//intracellular organelle;GO:0032991//macromolecular complex;GO:0043234//protein complex;GO:0044421//extracellular region part;GO:0044444//cytoplasmic part;GO:0043226//organelle;GO:1903561//extracellular vesicle;GO:0031982//vesicle;GO:0005576//extracellular region;GO:0005737//cytoplasm;GO:0005623//cell;GO:0005622//intracellular;GO:0043230//extracellular organelle;GO:0044424//intracellul…	GO:0016818//hydrolase activity, acting on acid anhydrides, in phosphorus-containing anhydrides;GO:0001883//purine nucleoside binding;GO:0004386//helicase activity;GO:0016787//hydrolase activity;GO:0044822//poly(A) RNA binding;GO:0016817//hydrolase activity, acting on acid anhydrides;GO:0005488//binding;GO:0003824//catalytic activity;GO:0097367//carbohydrate derivative binding;GO:0032549//ribonucl…	GO:0048856//anatomical structure development;GO:0009059//macromolecule biosynthetic process;GO:0016070//RNA metabolic process;GO:0006401//RNA catabolic process;GO:0034655//nucleobase-containing compound catabolic process;GO:0009057//macromolecule catabolic process;GO:1901361//organic cyclic compound catabolic process;GO:0010467//gene expression;GO:0044265//cellular macromolecule catabolic process…
XP_005906425	0	76.8133	0.001	4.27667	12.0623	0.000569946	0.0846704	no	CDC14A	PREDICTED: dual specificity protein phosphatase CDC14A isoform X3 [Bos mutus]	Cellular Processes	Cell growth and death	ko04110//Cell cycle	K06639	-	-	-
XP_005887212	0	22.5533	0.001	4.26667	12.0589	0.0269321	0.441811	no	SEC11A	PREDICTED: signal peptidase complex catalytic subunit SEC11A isoform X2 [Bos mutus]	Genetic Information Processing	Folding, sorting and degradation	ko03060//Protein export	K13280	GO:0016020//membrane;GO:0044425//membrane part;GO:1903561//extracellular vesicle;GO:0043226//organelle;GO:0044421//extracellular region part;GO:0043230//extracellular organelle;GO:0005622//intracellular;GO:0043231//intracellular membrane-bounded organelle;GO:0043229//intracellular organelle;GO:0031224//intrinsic component of membrane;GO:0005623//cell;GO:0031982//vesicle;GO:0044464//cell part;GO:0…	GO:0008233//peptidase activity;GO:0070011//peptidase activity, acting on L-amino acid peptides;GO:0003824//catalytic activity;GO:0016787//hydrolase activity	GO:0008152//metabolic process;GO:0044238//primary metabolic process;GO:0010467//gene expression;GO:0071704//organic substance metabolic process;GO:0006508//proteolysis;GO:0016485//protein processing;GO:0043170//macromolecule metabolic process;GO:0019538//protein metabolic process;GO:0051604//protein maturation
XP_005899095	0	268.317	0.001	4.19	12.0327	1.74e-05	0.00895488	up	POLR2B	DNA-directed RNA polymerase II subunit RPB2 [Bos taurus]	Metabolism;Genetic Information Processing	Nucleotide metabolism;Transcription	ko00230//Purine metabolism;ko00240//Pyrimidine metabolism;ko03020//RNA polymerase	K03010	-	-	-
XM_005905943	0	90.9667	0.001	4.18	12.0293	1.27e-06	0.00128079	up	CERKL	PREDICTED: Bos mutus ceramide kinase-like (CERKL), mRNA	-	-	-	-	GO:0044424//intracellular part;GO:0043231//intracellular membrane-bounded organelle;GO:0044464//cell part;GO:0043229//intracellular organelle;GO:0043226//organelle;GO:0005622//intracellular;GO:0005623//cell;GO:0043227//membrane-bounded organelle	GO:0003824//catalytic activity;GO:0016740//transferase activity;GO:0016772//transferase activity, transferring phosphorus-containing groups	GO:0006793//phosphorus metabolic process;GO:0044237//cellular metabolic process;GO:0009987//cellular process;GO:0044699//single-organism process;GO:0006915//apoptotic process;GO:0006796//phosphate-containing compound metabolic process;GO:0008219//cell death;GO:0012501//programmed cell death;GO:0008152//metabolic process;GO:0044763//single-organism cellular process
XP_005901916	0	138.86	0.001	4.1	12.0014	0.00179246	0.152437	no	TTC16	PREDICTED: tetratricopeptide repeat protein 16 [Bos mutus]	-	-	-	-	-	-	-
XP_014337597	0	37.6733	0.001	4.1	12.0014	0.0111112	0.320512	no	PKNOX1	PREDICTED: homeobox protein PKNOX1 isoform X2 [Lipotes vexillifer]	-	-	-	-	GO:0005622//intracellular;GO:0005623//cell;GO:0043229//intracellular organelle;GO:0044424//intracellular part;GO:0043226//organelle;GO:0043231//intracellular membrane-bounded organelle;GO:0032991//macromolecular complex;GO:0043227//membrane-bounded organelle;GO:0044464//cell part;GO:0043234//protein complex	GO:0003677//DNA binding;GO:0001071//nucleic acid binding transcription factor activity;GO:0097159//organic cyclic compound binding;GO:0005515//protein binding;GO:0003700//transcription factor activity, sequence-specific DNA binding;GO:0046983//protein dimerization activity;GO:1901363//heterocyclic compound binding;GO:0003676//nucleic acid binding;GO:0000981//RNA polymerase II transcription factor…	GO:0044249//cellular biosynthetic process;GO:0097659//nucleic acid-templated transcription;GO:0002520//immune system development;GO:0006725//cellular aromatic compound metabolic process;GO:0046483//heterocycle metabolic process;GO:0045321//leukocyte activation;GO:0048856//anatomical structure development;GO:0008152//metabolic process;GO:0044238//primary metabolic process;GO:0090304//nucleic acid …
XP_014331838	0	127.23	0.001	4.04667	11.9825	0.00276586	0.180845	no	DNAI2	Dynein intermediate chain 2, axonemal [Bos mutus]	-	-	-	-	GO:0097014//ciliary plasm;GO:0005856//cytoskeleton;GO:0044424//intracellular part;GO:0043229//intracellular organelle;GO:0042995//cell projection;GO:0032991//macromolecular complex;GO:0043228//non-membrane-bounded organelle;GO:0044422//organelle part;GO:1902494//catalytic complex;GO:0044463//cell projection part;GO:0005875//microtubule associated complex;GO:0044441//ciliary part;GO:0005858//axone…	GO:0016818//hydrolase activity, acting on acid anhydrides, in phosphorus-containing anhydrides;GO:0017111//nucleoside-triphosphatase activity;GO:0016817//hydrolase activity, acting on acid anhydrides;GO:0003824//catalytic activity;GO:0016462//pyrophosphatase activity;GO:0016787//hydrolase activity;GO:0003774//motor activity	GO:0009855//determination of bilateral symmetry;GO:0032502//developmental process;GO:0044782//cilium organization;GO:0006461//protein complex assembly;GO:0048646//anatomical structure formation involved in morphogenesis;GO:0022607//cellular component assembly;GO:0010927//cellular component assembly involved in morphogenesis;GO:0070271//protein complex biogenesis;GO:0007275//multicellular organism…
XP_005907368	0	539.94	0.001	4.02667	11.9754	0.000324646	0.0639969	no	SPTBN1	spectrin beta chain, non-erythrocytic 1 [Bos taurus]	-	-	-	-	GO:0044449//contractile fiber part;GO:0015629//actin cytoskeleton;GO:0044422//organelle part;GO:0030017//sarcomere;GO:0014069//postsynaptic density;GO:0044456//synapse part;GO:0060076//excitatory synapse;GO:0043229//intracellular organelle;GO:0098590//plasma membrane region;GO:0045202//synapse;GO:0099568//cytoplasmic region;GO:0005856//cytoskeleton;GO:0044428//nuclear part;GO:0043005//neuron proj…	GO:0008092//cytoskeletal protein binding;GO:0008289//lipid binding;GO:0003723//RNA binding;GO:0097159//organic cyclic compound binding;GO:0005198//structural molecule activity;GO:1901363//heterocyclic compound binding;GO:0003676//nucleic acid binding;GO:0019899//enzyme binding;GO:0005515//protein binding;GO:0005488//binding	GO:1990778//protein localization to cell periphery;GO:0050794//regulation of cellular process;GO:0033036//macromolecule localization;GO:0051716//cellular response to stimulus;GO:0051130//positive regulation of cellular component organization;GO:0007167//enzyme linked receptor protein signaling pathway;GO:0006810//transport;GO:0023052//signaling;GO:0065007//biological regulation;GO:0010256//endome…
XP_005909795	0	10.7233	0.001	4.02	11.973	0.049231	0.542936	no	GTSF1L	PREDICTED: gametocyte-specific factor 1-like isoform X1 [Bos mutus]	-	-	-	-	-	-	-
XP_014332941	0	541.507	0.001	4	11.9658	0.000322275	0.0639969	no	SON	PREDICTED: protein SON isoform X1 [Bison bison bison]	-	-	-	-	GO:0016604//nuclear body;GO:0005622//intracellular;GO:0005634//nucleus;GO:0044451//nucleoplasm part;GO:0043229//intracellular organelle;GO:0044422//organelle part;GO:0043227//membrane-bounded organelle;GO:0043226//organelle;GO:0044428//nuclear part;GO:0044424//intracellular part;GO:0031974//membrane-enclosed lumen;GO:0044446//intracellular organelle part;GO:0043231//intracellular membrane-bounded…	GO:1901363//heterocyclic compound binding;GO:0003676//nucleic acid binding;GO:0003723//RNA binding;GO:0005515//protein binding;GO:0097159//organic cyclic compound binding;GO:0005488//binding;GO:0019904//protein domain specific binding	GO:0007049//cell cycle;GO:0006725//cellular aromatic compound metabolic process;GO:0043170//macromolecule metabolic process;GO:0022402//cell cycle process;GO:0008380//RNA splicing;GO:0009987//cellular process;GO:0044237//cellular metabolic process;GO:0090304//nucleic acid metabolic process;GO:0010467//gene expression;GO:0071704//organic substance metabolic process;GO:0044260//cellular macromolecu…
XP_005910079	0	72.4333	0.001	3.99667	11.9646	0.000882922	0.10403	no	ILF2	interleukin enhancer-binding factor 2 [Mus musculus]	-	-	-	-	GO:0043226//organelle;GO:0070013//intracellular organelle lumen;GO:0031981//nuclear lumen;GO:0043227//membrane-bounded organelle;GO:0043233//organelle lumen;GO:0044464//cell part;GO:0043231//intracellular membrane-bounded organelle;GO:0044446//intracellular organelle part;GO:0043229//intracellular organelle;GO:0044424//intracellular part;GO:0031974//membrane-enclosed lumen;GO:0005634//nucleus;GO:…	GO:0001883//purine nucleoside binding;GO:0032549//ribonucleoside binding;GO:0036094//small molecule binding;GO:0003824//catalytic activity;GO:0005488//binding;GO:0097159//organic cyclic compound binding;GO:0003723//RNA binding;GO:1901363//heterocyclic compound binding;GO:0003676//nucleic acid binding;GO:0097367//carbohydrate derivative binding;GO:0001882//nucleoside binding;GO:0032550//purine rib…	GO:1901360//organic cyclic compound metabolic process;GO:0034645//cellular macromolecule biosynthetic process;GO:0006139//nucleobase-containing compound metabolic process;GO:1901576//organic substance biosynthetic process;GO:0044237//cellular metabolic process;GO:0034654//nucleobase-containing compound biosynthetic process;GO:0034641//cellular nitrogen compound metabolic process;GO:0016070//RNA m…
XP_005886778	0	30.5467	0.001	3.98	11.9586	0.000283395	0.0607853	no	GSTK1	PREDICTED: glutathione S-transferase kappa 1 isoform X1 [Bos mutus]	Cellular Processes;Metabolism	Transport and catabolism;Xenobiotics biodegradation and metabolism;Metabolism of other amino acids	ko04146//Peroxisome;ko00980//Metabolism of xenobiotics by cytochrome P450;ko00982//Drug metabolism - cytochrome P450;ko00480//Glutathione metabolism	K13299	GO:0042579//microbody;GO:0019866//organelle inner membrane;GO:0031090//organelle membrane;GO:0005623//cell;GO:0005737//cytoplasm;GO:0043231//intracellular membrane-bounded organelle;GO:0044422//organelle part;GO:0031967//organelle envelope;GO:0044421//extracellular region part;GO:0043230//extracellular organelle;GO:0043226//organelle;GO:0044424//intracellular part;GO:0044446//intracellular organe…	GO:0016209//antioxidant activity;GO:0003824//catalytic activity;GO:0016667//oxidoreductase activity, acting on a sulfur group of donors;GO:0015036//disulfide oxidoreductase activity;GO:0005488//binding;GO:0016491//oxidoreductase activity;GO:0005515//protein binding;GO:0004601//peroxidase activity;GO:0016684//oxidoreductase activity, acting on peroxide as acceptor	GO:0098754//detoxification;GO:0032502//developmental process;GO:0006790//sulfur compound metabolic process;GO:0008152//metabolic process;GO:0048869//cellular developmental process;GO:0050896//response to stimulus;GO:0044699//single-organism process;GO:1990748//cellular detoxification;GO:0044710//single-organism metabolic process;GO:0044767//single-organism developmental process;GO:0009636//respon…
XP_005897563	0	129.603	0.001	3.95333	11.9489	9.13e-08	0.000141143	up	APBA1	PREDICTED: amyloid beta A4 precursor protein-binding family A member 1, partial [Bos mutus]	-	-	-	-	GO:0044456//synapse part;GO:0045202//synapse	-	GO:0071702//organic substance transport;GO:0099537//trans-synaptic signaling;GO:0099536//synaptic signaling;GO:0023052//signaling;GO:0022607//cellular component assembly;GO:0051234//establishment of localization;GO:0008152//metabolic process;GO:0044767//single-organism developmental process;GO:0008104//protein localization;GO:0033036//macromolecule localization;GO:0071704//organic substance metab…
XP_005892918	0	202.24	0.001	3.92333	11.9379	0.00137855	0.133167	no	GTF2I	PREDICTED: general transcription factor II-I isoform X5 [Bos taurus]	Genetic Information Processing;Environmental Information Processing	Signal transduction;Transcription	ko04022//cGMP - PKG signaling pathway;ko03022//Basal transcription factors	K03121	-	-	-
XP_005891555	0	117.163	0.001	3.91667	11.9354	0.00313084	0.190423	no	ANKRD13A	ankyrin repeat domain-containing protein 13A [Bos taurus]	-	-	-	-	-	-	-
XP_005896615	0	154.563	0.001	3.90667	11.9317	0.00206647	0.160403	no	LRRC36	PREDICTED: leucine-rich repeat-containing protein 36 [Bos mutus]	-	-	-	-	-	-	-
XP_005896695	0	82.2367	0.001	3.84	11.9069	2.93e-06	0.00237126	up	ENPP5	PREDICTED: ectonucleotide pyrophosphatase/phosphodiesterase family member 5 isoform X1 [Bos mutus]	-	-	-	-	GO:0044425//membrane part;GO:0031224//intrinsic component of membrane;GO:0016020//membrane	-	-
XP_005901797	0	143.437	0.001	3.81333	11.8968	0.00230276	0.168226	no	RFX2	PREDICTED: DNA-binding protein RFX2 isoform X1 [Bos mutus]	-	-	-	-	-	-	-
XP_014337998	0	27.2467	0.001	3.77667	11.8829	0.000822367	0.099346	no	HMGN1	PREDICTED: non-histone chromosomal protein HMG-14, partial [Bison bison bison]	-	-	-	-	GO:0005623//cell;GO:0043229//intracellular organelle;GO:0043226//organelle;GO:0044424//intracellular part;GO:0005622//intracellular;GO:0043227//membrane-bounded organelle;GO:0044464//cell part;GO:0043231//intracellular membrane-bounded organelle	GO:0003677//DNA binding;GO:0097159//organic cyclic compound binding;GO:0003676//nucleic acid binding;GO:0043566//structure-specific DNA binding;GO:0003682//chromatin binding;GO:0044877//macromolecular complex binding;GO:0005488//binding;GO:0031490//chromatin DNA binding;GO:1901363//heterocyclic compound binding	GO:0009987//cellular process;GO:0044699//single-organism process;GO:0050896//response to stimulus;GO:0065007//biological regulation;GO:0050789//regulation of biological process
XM_005908044	0	71.3567	0.001	3.77333	11.8816	6.24e-06	0.00405082	up	LOC102269969	PREDICTED: Bos mutus NKG2D ligand 2 (LOC102269969), transcript variant X1, mRNA	Organismal Systems	Immune system	ko04650//Natural killer cell mediated cytotoxicity	K07986	-	-	-
XP_014332085	0	380.537	0.001	3.76667	11.8791	1.15e-05	0.00648535	up	TJP1	PREDICTED: tight junction protein ZO-1 isoform X1 [Bubalus bubalis]	Cellular Processes	Cellular commiunity	ko04530//Tight junction;ko04520//Adherens junction;ko04540//Gap junction	K05701	GO:0043226//organelle;GO:0005623//cell;GO:0043231//intracellular membrane-bounded organelle;GO:0016020//membrane;GO:0005911//cell-cell junction;GO:0043227//membrane-bounded organelle;GO:0044464//cell part;GO:0071944//cell periphery;GO:0044291//cell-cell contact zone;GO:0043229//intracellular organelle;GO:0005886//plasma membrane;GO:0005622//intracellular;GO:0044424//intracellular part;GO:0030054/…	GO:0005488//binding;GO:0005515//protein binding	GO:0009987//cellular process;GO:0003158//endothelium development;GO:0048468//cell development;GO:0050954//sensory perception of mechanical stimulus;GO:0003008//system process;GO:0060429//epithelium development;GO:0032502//developmental process;GO:0044767//single-organism developmental process;GO:0009888//tissue development;GO:0044763//single-organism cellular process;GO:0002064//epithelial cell d…
XP_005905414	0	56.6833	0.001	3.73	11.865	1.79e-05	0.0091386	up	CRHR1	PREDICTED: corticotropin-releasing factor receptor 1 [Bos mutus]	Organismal Systems;Environmental Information Processing	Signaling molecules and interaction;Nervous system	ko04080//Neuroactive ligand-receptor interaction;ko04730//Long-term depression	K04578	GO:0043227//membrane-bounded organelle;GO:0044424//intracellular part;GO:0043231//intracellular membrane-bounded organelle;GO:0005773//vacuole;GO:0016020//membrane;GO:0005886//plasma membrane;GO:0005737//cytoplasm;GO:0031224//intrinsic component of membrane;GO:0043226//organelle;GO:0044444//cytoplasmic part;GO:0071944//cell periphery;GO:0005622//intracellular;GO:0044425//membrane part;GO:0044464/…	GO:0060089//molecular transducer activity;GO:0004872//receptor activity;GO:0038023//signaling receptor activity;GO:0004888//transmembrane signaling receptor activity;GO:0004930//G-protein coupled receptor activity;GO:0004871//signal transducer activity;GO:0099600//transmembrane receptor activity	GO:0051179//localization;GO:0042886//amide transport;GO:0009719//response to endogenous stimulus;GO:2000849//regulation of glucocorticoid secretion;GO:0050794//regulation of cellular process;GO:0032879//regulation of localization;GO:0023051//regulation of signaling;GO:0010033//response to organic substance;GO:0050896//response to stimulus;GO:0043434//response to peptide hormone;GO:0023052//signal…
XP_005896261	0	168.54	0.001	3.68	11.8455	0.00182502	0.15347	no	DDX24	PREDICTED: ATP-dependent RNA helicase DDX24 [Bos mutus]	-	-	-	-	-	-	-
XP_005894829	0	121.99	0.001	3.67667	11.8442	1.34e-07	0.000190119	up	ADD3	PREDICTED: gamma-adducin isoform X1 [Bos mutus]	-	-	-	-	GO:0031981//nuclear lumen;GO:0044464//cell part;GO:0044428//nuclear part;GO:0044422//organelle part;GO:0044446//intracellular organelle part;GO:0060076//excitatory synapse;GO:0045202//synapse;GO:0098862//cluster of actin-based cell projections;GO:0099572//postsynaptic specialization;GO:0005623//cell;GO:0043231//intracellular membrane-bounded organelle;GO:0044424//intracellular part;GO:0031974//me…	-	-
XP_005908112	0	29.51	0.001	3.64667	11.8324	0.00330256	0.194562	no	PCMT1	PREDICTED: protein-L-isoaspartate(D-aspartate) O-methyltransferase isoform X4 [Bos mutus]	-	-	-	-	GO:0043230//extracellular organelle;GO:0043226//organelle;GO:0031224//intrinsic component of membrane;GO:0044464//cell part;GO:0005576//extracellular region;GO:0005623//cell;GO:0043231//intracellular membrane-bounded organelle;GO:0044421//extracellular region part;GO:0043229//intracellular organelle;GO:0005737//cytoplasm;GO:0044425//membrane part;GO:0005622//intracellular;GO:0031982//vesicle;GO:0…	GO:0003824//catalytic activity;GO:0008757//S-adenosylmethionine-dependent methyltransferase activity;GO:0016740//transferase activity;GO:0005488//binding;GO:0008168//methyltransferase activity;GO:0016741//transferase activity, transferring one-carbon groups	GO:0019538//protein metabolic process;GO:0009987//cellular process;GO:0044238//primary metabolic process;GO:0044260//cellular macromolecule metabolic process;GO:0043170//macromolecule metabolic process;GO:0044237//cellular metabolic process;GO:0006464//cellular protein modification process;GO:0043412//macromolecule modification;GO:0044267//cellular protein metabolic process;GO:0036211//protein mo…
XP_005907242	0	137.827	0.001	3.63667	11.8284	0.00245497	0.17153	no	FOXK2	PREDICTED: forkhead box protein K2 [Bos mutus]	-	-	-	-	-	-	-
XP_005899118	0	16.1567	0.001	3.62667	11.8244	0.0390881	0.505277	no	IGFBP7	PREDICTED: insulin-like growth factor-binding protein 7, partial [Bos mutus]	-	-	-	-	GO:0043227//membrane-bounded organelle;GO:0043230//extracellular organelle;GO:0043226//organelle;GO:0044421//extracellular region part;GO:0031982//vesicle;GO:0005576//extracellular region;GO:1903561//extracellular vesicle	GO:0019838//growth factor binding;GO:0005488//binding;GO:0005515//protein binding	GO:0008283//cell proliferation;GO:0022610//biological adhesion;GO:0044699//single-organism process
XP_014336343	0	131.19	0.001	3.62	11.8218	0.00263082	0.177471	no	ACSL6	PREDICTED: LOW QUALITY PROTEIN: long-chain-fatty-acid--CoA ligase 6 [Bos mutus]	Cellular Processes;Metabolism;Organismal Systems	Global and Overview;Transport and catabolism;Endocrine system;Lipid metabolism	ko04146//Peroxisome;ko04920//Adipocytokine signaling pathway;ko03320//PPAR signaling pathway;ko01212//Fatty acid metabolism;ko00071//Fatty acid degradation;ko00061//Fatty acid biosynthesis	K01897	GO:0043227//membrane-bounded organelle;GO:0043226//organelle;GO:0044464//cell part;GO:0016020//membrane;GO:0044425//membrane part;GO:0005622//intracellular;GO:0044424//intracellular part;GO:0043231//intracellular membrane-bounded organelle;GO:0005623//cell;GO:0043229//intracellular organelle;GO:0031224//intrinsic component of membrane	GO:0015645//fatty acid ligase activity;GO:0016877//ligase activity, forming carbon-sulfur bonds;GO:0016874//ligase activity;GO:0003824//catalytic activity	GO:0048731//system development;GO:0044699//single-organism process;GO:0032502//developmental process;GO:0048699//generation of neurons;GO:0044767//single-organism developmental process;GO:0022008//neurogenesis;GO:0044763//single-organism cellular process;GO:0007275//multicellular organism development;GO:0048856//anatomical structure development;GO:0048869//cellular developmental process;GO:003015…
XP_014337191	0	9.95	0.001	3.57333	11.8031	0.0230301	0.416745	no	LOC102278569	protein BEX2 [Bos taurus]	-	-	-	-	GO:0005623//cell;GO:0005622//intracellular;GO:0044464//cell part;GO:0044424//intracellular part	-	GO:0012501//programmed cell death;GO:0044699//single-organism process;GO:0009987//cellular process;GO:0008219//cell death;GO:0044763//single-organism cellular process
XP_005888620	0	183.297	0.001	3.55667	11.7963	4.73e-05	0.0186376	up	INTS7	integrator complex subunit 7 [Bos taurus]	-	-	-	-	GO:0061695//transferase complex, transferring phosphorus-containing groups;GO:0030880//RNA polymerase complex;GO:0031981//nuclear lumen;GO:0044422//organelle part;GO:0044428//nuclear part;GO:0032991//macromolecular complex;GO:0016591//DNA-directed RNA polymerase II, holoenzyme;GO:0043232//intracellular non-membrane-bounded organelle;GO:0043233//organelle lumen;GO:0044451//nucleoplasm part;GO:0044…	-	GO:0016073//snRNA metabolic process;GO:0090304//nucleic acid metabolic process;GO:0006725//cellular aromatic compound metabolic process;GO:0006807//nitrogen compound metabolic process;GO:0010212//response to ionizing radiation;GO:0050896//response to stimulus;GO:0006950//response to stress;GO:1901360//organic cyclic compound metabolic process;GO:0034660//ncRNA metabolic process;GO:0051716//cellul…
XP_014334727	0	158.11	0.001	3.55	11.7936	3.28e-08	6.38e-05	up	DHTKD1	PREDICTED: probable 2-oxoglutarate dehydrogenase E1 component DHKTD1, mitochondrial [Bos mutus]	-	-	-	-	-	-	-
XP_005904897	0	179.66	0.001	3.54333	11.7909	0.00165228	0.146421	no	GANAB	PREDICTED: neutral alpha-glucosidase AB isoform X2 [Bos mutus]	Metabolism;Genetic Information Processing	Folding, sorting and degradation;Glycan biosynthesis and metabolism	ko04141//Protein processing in endoplasmic reticulum;ko00510//N-Glycan biosynthesis	K05546	GO:0032991//macromolecular complex;GO:0043234//protein complex;GO:0005576//extracellular region;GO:0043230//extracellular organelle;GO:0043227//membrane-bounded organelle;GO:0043226//organelle;GO:0031982//vesicle;GO:1903561//extracellular vesicle;GO:0044421//extracellular region part	GO:0003824//catalytic activity;GO:0016798//hydrolase activity, acting on glycosyl bonds;GO:0097159//organic cyclic compound binding;GO:0003676//nucleic acid binding;GO:1901363//heterocyclic compound binding;GO:0005488//binding;GO:0016787//hydrolase activity;GO:0003723//RNA binding	GO:0044238//primary metabolic process;GO:0008152//metabolic process
XP_005886901	0	102.97	0.001	3.50333	11.7745	0.0036758	0.203998	no	PIGQ	PREDICTED: phosphatidylinositol N-acetylglucosaminyltransferase subunit Q [Bos mutus]	Metabolism	Glycan biosynthesis and metabolism	ko00563//Glycosylphosphatidylinositol(GPI)-anchor biosynthesis	K03860	GO:0016020//membrane;GO:0044425//membrane part;GO:0031224//intrinsic component of membrane	GO:0008375//acetylglucosaminyltransferase activity;GO:0016757//transferase activity, transferring glycosyl groups;GO:0016740//transferase activity;GO:0016758//transferase activity, transferring hexosyl groups;GO:0008194//UDP-glycosyltransferase activity;GO:0003824//catalytic activity	GO:0044237//cellular metabolic process;GO:0044249//cellular biosynthetic process;GO:1901576//organic substance biosynthetic process;GO:0034645//cellular macromolecule biosynthetic process;GO:0042158//lipoprotein biosynthetic process;GO:0009059//macromolecule biosynthetic process;GO:0009058//biosynthetic process;GO:0044238//primary metabolic process;GO:0009987//cellular process;GO:0042157//lipopro…
XP_014331861	0	672.113	0.001	3.45	11.7524	0.000244617	0.0560661	no	USP34	PREDICTED: LOW QUALITY PROTEIN: ubiquitin carboxyl-terminal hydrolase 34 [Bos mutus]	-	-	-	-	-	GO:0070011//peptidase activity, acting on L-amino acid peptides;GO:0004175//endopeptidase activity;GO:0016787//hydrolase activity;GO:0101005//ubiquitinyl hydrolase activity;GO:0008233//peptidase activity;GO:0036459//thiol-dependent ubiquitinyl hydrolase activity;GO:0008234//cysteine-type peptidase activity;GO:0003824//catalytic activity;GO:0019783//ubiquitin-like protein-specific protease activity	GO:0070647//protein modification by small protein conjugation or removal;GO:0044267//cellular protein metabolic process;GO:0023051//regulation of signaling;GO:0008152//metabolic process;GO:0043170//macromolecule metabolic process;GO:0009056//catabolic process;GO:0030111//regulation of Wnt signaling pathway;GO:0050789//regulation of biological process;GO:0019941//modification-dependent protein cat…
XP_005908269	0	21.83	0.001	3.42667	11.7426	0.0225556	0.414439	no	LIN37	protein lin-37 homolog [Bos taurus]	-	-	-	-	GO:0032991//macromolecular complex;GO:0043234//protein complex	-	-
NP_001280699	0	75.65	0.001	3.41	11.7356	0.000500648	0.0780684	no	AZIN2	antizyme inhibitor 2 [Bos mutus]	Metabolism	Amino acid metabolism	ko00330//Arginine and proline metabolism	K01583	-	-	-
XP_005906292	0	75.65	0.001	3.41	11.7356	0.000500308	0.0780684	no	AZIN2	antizyme inhibitor 2 [Bos mutus]	Metabolism	Amino acid metabolism	ko00330//Arginine and proline metabolism	K01583	-	-	-
XP_005894007	0	90.65	0.001	3.38333	11.7242	0.00446705	0.22485	no	UBOX5	PREDICTED: RING finger protein 37 isoform X1 [Bos mutus]	Genetic Information Processing	Folding, sorting and degradation	ko04120//Ubiquitin mediated proteolysis	K10600	-	-	-
XP_005907125	0	20.2433	0.001	3.38333	11.7242	0.0299449	0.459062	no	JAGN1	protein jagunal homolog 1 [Bos taurus]	-	-	-	-	GO:0044464//cell part;GO:0012505//endomembrane system;GO:0044424//intracellular part;GO:0042175//nuclear outer membrane-endoplasmic reticulum membrane network;GO:0005623//cell;GO:0016020//membrane;GO:0031224//intrinsic component of membrane;GO:0005622//intracellular;GO:0043231//intracellular membrane-bounded organelle;GO:0043226//organelle;GO:0043229//intracellular organelle;GO:0043227//membrane-…	-	GO:0048869//cellular developmental process;GO:0044699//single-organism process;GO:0032502//developmental process;GO:0010033//response to organic substance;GO:0002521//leukocyte differentiation;GO:0030851//granulocyte differentiation;GO:0030099//myeloid cell differentiation;GO:0040011//locomotion;GO:0019221//cytokine-mediated signaling pathway;GO:0044767//single-organism developmental process;GO:0…
XP_005891743	0	43.0567	0.001	3.29	11.6839	0.00430416	0.221171	no	TGOLN2	PREDICTED: trans-Golgi network integral membrane protein 2-like [Bos mutus]	-	-	-	-	GO:0043231//intracellular membrane-bounded organelle;GO:0043226//organelle;GO:0005794//Golgi apparatus;GO:0005622//intracellular;GO:0044424//intracellular part;GO:0012505//endomembrane system;GO:0044464//cell part;GO:0043229//intracellular organelle;GO:0031224//intrinsic component of membrane;GO:0044425//membrane part;GO:0005623//cell;GO:0016020//membrane;GO:0044444//cytoplasmic part;GO:0043227//…	-	-
XP_005889392	0	124.093	0.001	3.26667	11.6736	1.37e-07	0.000190119	up	FCHO2	PREDICTED: LOW QUALITY PROTEIN: FCH domain only protein 2 [Bison bison bison]	-	-	-	-	GO:0031410//cytoplasmic vesicle;GO:0005622//intracellular;GO:0012505//endomembrane system;GO:0044464//cell part;GO:0016023//cytoplasmic, membrane-bounded vesicle;GO:0043229//intracellular organelle;GO:0031982//vesicle;GO:0044424//intracellular part;GO:0031988//membrane-bounded vesicle;GO:0005623//cell;GO:0043226//organelle;GO:0044444//cytoplasmic part;GO:0030135//coated vesicle;GO:0043231//intrac…	GO:1902936//phosphatidylinositol bisphosphate binding;GO:0008289//lipid binding;GO:1901981//phosphatidylinositol phosphate binding;GO:0005543//phospholipid binding;GO:0005488//binding;GO:0035091//phosphatidylinositol binding	GO:0016043//cellular component organization;GO:0044763//single-organism cellular process;GO:0061024//membrane organization;GO:0071840//cellular component organization or biogenesis;GO:0044802//single-organism membrane organization;GO:0006898//receptor-mediated endocytosis;GO:0016192//vesicle-mediated transport;GO:0006900//membrane budding;GO:0006897//endocytosis;GO:0007009//plasma membrane organi…
XP_005891592	0	71.2167	0.001	3.26667	11.6736	0.00619403	0.259478	no	LAMP2	PREDICTED: lysosome-associated membrane glycoprotein 2 isoform X2 [Bubalus bubalis]	Cellular Processes	Transport and catabolism	ko04145//Phagosome;ko04142//Lysosome	K06528	GO:0044422//organelle part;GO:0044464//cell part;GO:0098805//whole membrane;GO:0043230//extracellular organelle;GO:0031410//cytoplasmic vesicle;GO:0030666//endocytic vesicle membrane;GO:1903561//extracellular vesicle;GO:0005623//cell;GO:0043227//membrane-bounded organelle;GO:0005774//vacuolar membrane;GO:0098588//bounding membrane of organelle;GO:0044421//extracellular region part;GO:0030659//cyt…	GO:0005488//binding;GO:0005515//protein binding	GO:0042592//homeostatic process;GO:0065008//regulation of biological quality;GO:0031647//regulation of protein stability;GO:0065007//biological regulation;GO:0044763//single-organism cellular process;GO:0044699//single-organism process;GO:0009987//cellular process;GO:0019725//cellular homeostasis;GO:0006914//autophagy
XP_005902401	0	15.0567	0.001	3.25	11.6662	0.0419685	0.517788	no	TDRP	PREDICTED: testis development-related protein-like [Bos mutus]	-	-	-	-	GO:0043226//organelle;GO:0005622//intracellular;GO:0005623//cell;GO:0044424//intracellular part;GO:0043227//membrane-bounded organelle;GO:0044464//cell part	-	GO:0022414//reproductive process;GO:0019953//sexual reproduction;GO:0032501//multicellular organismal process;GO:0051704//multi-organism process;GO:0048609//multicellular organismal reproductive process;GO:0044702//single organism reproductive process;GO:0000003//reproduction;GO:0044703//multi-organism reproductive process;GO:0044699//single-organism process;GO:0007276//gamete generation;GO:00325…
XP_005894385	0.0433333	198.907	0.00333333	10.7667	11.6573	8.15e-10	3.06e-06	up	LOC102266740	PREDICTED: ATP-dependent RNA helicase DDX19A isoform X2 [Bos mutus]	-	-	-	-	GO:0043231//intracellular membrane-bounded organelle;GO:0044422//organelle part;GO:0005634//nucleus;GO:0005622//intracellular;GO:0005623//cell;GO:0044424//intracellular part;GO:0031967//organelle envelope;GO:0012505//endomembrane system;GO:0044464//cell part;GO:0005635//nuclear envelope;GO:0043229//intracellular organelle;GO:0043226//organelle;GO:0044428//nuclear part;GO:0043227//membrane-bounded…	GO:0016462//pyrophosphatase activity;GO:0003824//catalytic activity;GO:0097159//organic cyclic compound binding;GO:0017111//nucleoside-triphosphatase activity;GO:0016817//hydrolase activity, acting on acid anhydrides;GO:0001883//purine nucleoside binding;GO:0001882//nucleoside binding;GO:0032549//ribonucleoside binding;GO:0005488//binding;GO:0032550//purine ribonucleoside binding;GO:0016818//hydr…	GO:0071702//organic substance transport;GO:0033036//macromolecule localization;GO:0006403//RNA localization;GO:0071705//nitrogen compound transport;GO:0015931//nucleobase-containing compound transport;GO:0051236//establishment of RNA localization;GO:0008104//protein localization;GO:0050657//nucleic acid transport;GO:0051234//establishment of localization;GO:0050658//RNA transport;GO:0051179//loca…
XP_005905576	0	297.93	0.001	3.23	11.6573	2.62e-10	1.15e-06	up	KIDINS220	PREDICTED: LOW QUALITY PROTEIN: kinase D-interacting substrate of 220 kDa [Bos mutus]	Organismal Systems	Nervous system	ko04722//Neurotrophin signaling pathway	K12460	-	-	-
XP_005906280	0	42.5833	0.001	3.21667	11.6514	0.00940801	0.300788	no	RBBP4	PREDICTED: histone-binding protein RBBP4 isoform X2 [Monodelphis domestica]	-	-	-	-	GO:0070603//SWI/SNF superfamily-type complex;GO:0000785//chromatin;GO:0044428//nuclear part;GO:0000228//nuclear chromosome;GO:0031981//nuclear lumen;GO:1902494//catalytic complex;GO:0000790//nuclear chromatin;GO:0005694//chromosome;GO:0005622//intracellular;GO:0043232//intracellular non-membrane-bounded organelle;GO:0044451//nucleoplasm part;GO:0044422//organelle part;GO:0043234//protein complex;…	GO:0017111//nucleoside-triphosphatase activity;GO:0000976//transcription regulatory region sequence-specific DNA binding;GO:0003690//double-stranded DNA binding;GO:0003824//catalytic activity;GO:0005515//protein binding;GO:0000977//RNA polymerase II regulatory region sequence-specific DNA binding;GO:0016811//hydrolase activity, acting on carbon-nitrogen (but not peptide) bonds, in linear amides;G…	GO:0006351//transcription, DNA-templated;GO:0070271//protein complex biogenesis;GO:0009892//negative regulation of metabolic process;GO:0071103//DNA conformation change;GO:0006464//cellular protein modification process;GO:0010467//gene expression;GO:0072331//signal transduction by p53 class mediator;GO:0007154//cell communication;GO:0032774//RNA biosynthetic process;GO:0006259//DNA metabolic proc…
XP_005908607	0	106.627	0.001	3.21	11.6484	0.00262977	0.177471	no	PRPF6	pre-mRNA-processing factor 6 [Bos taurus]	Genetic Information Processing	Transcription	ko03040//Spliceosome	K12855	-	-	-
XP_014338792	0	48.6233	0.001	3.20333	11.6454	3.17e-05	0.0141785	up	LOC102279542	PREDICTED: membrane cofactor protein isoform X4 [Bos taurus]	Organismal Systems	Immune system	ko04610//Complement and coagulation cascades	K04007	GO:0044424//intracellular part;GO:0031224//intrinsic component of membrane;GO:0005622//intracellular;GO:0044464//cell part;GO:0005623//cell;GO:0005737//cytoplasm;GO:0044425//membrane part;GO:0016020//membrane	-	GO:0006950//response to stress;GO:0002443//leukocyte mediated immunity;GO:0000003//reproduction;GO:0002460//adaptive immune response based on somatic recombination of immune receptors built from immunoglobulin superfamily domains;GO:0022414//reproductive process;GO:0002250//adaptive immune response;GO:0002449//lymphocyte mediated immunity;GO:0016064//immunoglobulin mediated immune response;GO:000…
XP_005888863	0	135.12	0.001	3.15	11.6211	0.00251363	0.173576	no	FBRS	PREDICTED: probable fibrosin-1 isoform X2 [Ovis aries musimon]	-	-	-	-	-	-	-
XP_005897602	0	9.74667	0.001	3.12333	11.6089	0.0240057	0.423164	no	LOC102269270	eppin precursor [Bos taurus]	-	-	-	-	GO:0044464//cell part;GO:0044424//intracellular part;GO:0005623//cell;GO:0005622//intracellular	GO:0030234//enzyme regulator activity;GO:0030414//peptidase inhibitor activity;GO:0061134//peptidase regulator activity;GO:0098772//molecular function regulator;GO:0004857//enzyme inhibitor activity;GO:0004866//endopeptidase inhibitor activity;GO:0061135//endopeptidase regulator activity	GO:0050789//regulation of biological process;GO:0010466//negative regulation of peptidase activity;GO:0019222//regulation of metabolic process;GO:0043086//negative regulation of catalytic activity;GO:0045861//negative regulation of proteolysis;GO:0052547//regulation of peptidase activity;GO:0050790//regulation of catalytic activity;GO:0051246//regulation of protein metabolic process;GO:0032268//r…
XP_005901868	0	130.153	0.001	3.12	11.6073	0.00268673	0.178934	no	PFKP	PREDICTED: 6-phosphofructokinase type C [Bos mutus]	Genetic Information Processing;Environmental Information Processing;Metabolism	Signal transduction;Global and Overview;Carbohydrate metabolism;Folding, sorting and degradation	ko04152//AMPK signaling pathway;ko01200//Carbon metabolism;ko01230//Biosynthesis of amino acids;ko03018//RNA degradation;ko00010//Glycolysis / Gluconeogenesis;ko00030//Pentose phosphate pathway;ko00051//Fructose and mannose metabolism;ko00052//Galactose metabolism	K00850	GO:1903561//extracellular vesicle;GO:0043227//membrane-bounded organelle;GO:0043230//extracellular organelle;GO:0044421//extracellular region part;GO:0043231//intracellular membrane-bounded organelle;GO:0005622//intracellular;GO:0044444//cytoplasmic part;GO:0031982//vesicle;GO:0043229//intracellular organelle;GO:0044464//cell part;GO:0043226//organelle;GO:0005623//cell;GO:0005737//cytoplasm;GO:00…	GO:0005515//protein binding;GO:0032549//ribonucleoside binding;GO:0016772//transferase activity, transferring phosphorus-containing groups;GO:0001882//nucleoside binding;GO:0016301//kinase activity;GO:0008443//phosphofructokinase activity;GO:0043169//cation binding;GO:0097367//carbohydrate derivative binding;GO:1901363//heterocyclic compound binding;GO:0036094//small molecule binding;GO:0097159//…	GO:0000423//macromitophagy;GO:0046128//purine ribonucleoside metabolic process;GO:0006796//phosphate-containing compound metabolic process;GO:0046483//heterocycle metabolic process;GO:0044712//single-organism catabolic process;GO:0006793//phosphorus metabolic process;GO:0043436//oxoacid metabolic process;GO:0005975//carbohydrate metabolic process;GO:0022411//cellular component disassembly;GO:0006…
XP_005891885	0	281.18	0.001	3.11	11.6027	1.42e-05	0.00776997	up	BAZ1A	PREDICTED: bromodomain adjacent to zinc finger domain protein 1A [Bos mutus]	-	-	-	-	GO:0070603//SWI/SNF superfamily-type complex;GO:0005634//nucleus;GO:0044446//intracellular organelle part;GO:0044422//organelle part;GO:0044424//intracellular part;GO:0043227//membrane-bounded organelle;GO:0043231//intracellular membrane-bounded organelle;GO:0005623//cell;GO:0005622//intracellular;GO:0031010//ISWI-type complex;GO:0044428//nuclear part;GO:0043234//protein complex;GO:0043229//intra…	GO:0043169//cation binding;GO:0005488//binding;GO:0046914//transition metal ion binding;GO:0046872//metal ion binding;GO:0043167//ion binding	-
XP_005904041	0	86.1533	0.001	3.10333	11.5996	0.0003925	0.0694616	no	TMEM87A	transmembrane protein 87A precursor [Bos taurus]	-	-	-	-	GO:0031224//intrinsic component of membrane;GO:0044425//membrane part;GO:0016020//membrane	-	-
XP_005891183	0	33.46	0.001	3.07	11.584	0.00335034	0.195813	no	LOC102271038	rCG31804, isoform CRA_a [Rattus norvegicus]	-	-	-	-	-	-	-
XP_005902627	0	91.43	0.001	3.06333	11.5809	0.000322177	0.0639969	no	TMTC2	PREDICTED: transmembrane and TPR repeat-containing protein 2-like [Bos mutus]	-	-	-	-	GO:0043229//intracellular organelle;GO:0016020//membrane;GO:0044424//intracellular part;GO:0005623//cell;GO:0043227//membrane-bounded organelle;GO:0012505//endomembrane system;GO:0043226//organelle;GO:0044464//cell part;GO:0005622//intracellular;GO:0042175//nuclear outer membrane-endoplasmic reticulum membrane network;GO:0043231//intracellular membrane-bounded organelle;GO:0044425//membrane part;…	-	GO:0044723//single-organism carbohydrate metabolic process;GO:0065008//regulation of biological quality;GO:0055065//metal ion homeostasis;GO:0006486//protein glycosylation;GO:0098771//inorganic ion homeostasis;GO:0009058//biosynthetic process;GO:1901576//organic substance biosynthetic process;GO:0044238//primary metabolic process;GO:0065007//biological regulation;GO:0009987//cellular process;GO:0…
XP_014334402	0	30.2467	0.001	3.06333	11.5809	0.000227662	0.0543802	no	LOC102282464	CP52B protein [Salmo salar]	-	-	-	-	-	-	-
XP_005892843	0	52.9833	0.001	3.04667	11.573	1.86e-05	0.00934461	up	TRAPPC13	PREDICTED: trafficking protein particle complex subunit 13 isoform X6 [Ovis aries]	-	-	-	-	-	-	-
XP_005897454	0	44.05	0.001	3.04333	11.5714	0.00183298	0.153626	no	UCHL5	PREDICTED: ubiquitin carboxyl-terminal hydrolase isozyme L5 isoform X3 [Condylura cristata]	-	-	-	-	GO:0005634//nucleus;GO:0044444//cytoplasmic part;GO:0043226//organelle;GO:0044424//intracellular part;GO:0044427//chromosomal part;GO:0043228//non-membrane-bounded organelle;GO:0043229//intracellular organelle;GO:0044428//nuclear part;GO:0005622//intracellular;GO:0005623//cell;GO:0031981//nuclear lumen;GO:0044454//nuclear chromosome part;GO:0044422//organelle part;GO:0000228//nuclear chromosome;G…	GO:0016787//hydrolase activity;GO:0098772//molecular function regulator;GO:0005515//protein binding;GO:0061134//peptidase regulator activity;GO:0003824//catalytic activity;GO:0003723//RNA binding;GO:0032403//protein complex binding;GO:0097159//organic cyclic compound binding;GO:0019783//ubiquitin-like protein-specific protease activity;GO:0008233//peptidase activity;GO:0070011//peptidase activity…	GO:0031324//negative regulation of cellular metabolic process;GO:0031323//regulation of cellular metabolic process;GO:0019538//protein metabolic process;GO:0048856//anatomical structure development;GO:0030162//regulation of proteolysis;GO:0070646//protein modification by small protein removal;GO:0007420//brain development;GO:0044265//cellular macromolecule catabolic process;GO:0019222//regulation…
XP_014334591	0	92.92	0.001	3.04333	11.5714	0.000392137	0.0694616	no	KIAA0907	PREDICTED: UPF0469 protein KIAA0907 homolog isoform X1 [Bos taurus]	-	-	-	-	GO:0044464//cell part;GO:0043231//intracellular membrane-bounded organelle;GO:0043229//intracellular organelle;GO:0044424//intracellular part;GO:0005623//cell;GO:0043226//organelle;GO:0043227//membrane-bounded organelle;GO:0005622//intracellular	-	-
XP_014333295	0	224.157	0.001	3.03667	11.5683	0.00118322	0.124215	no	LARP1	PREDICTED: la-related protein 1 [Bos mutus]	-	-	-	-	GO:0043226//organelle;GO:0043233//organelle lumen;GO:0005634//nucleus;GO:0005622//intracellular;GO:0031974//membrane-enclosed lumen;GO:0043231//intracellular membrane-bounded organelle;GO:0043229//intracellular organelle;GO:0070013//intracellular organelle lumen;GO:0044464//cell part;GO:0044446//intracellular organelle part;GO:0043227//membrane-bounded organelle;GO:0044428//nuclear part;GO:003198…	GO:0097159//organic cyclic compound binding;GO:0031369//translation initiation factor binding;GO:0003729//mRNA binding;GO:0003723//RNA binding;GO:0003676//nucleic acid binding;GO:0090079//translation regulator activity, nucleic acid binding;GO:0044822//poly(A) RNA binding;GO:1901363//heterocyclic compound binding;GO:0045182//translation regulator activity;GO:0005515//protein binding;GO:0005488//b…	GO:0008152//metabolic process;GO:0050896//response to stimulus;GO:0044699//single-organism process;GO:0044271//cellular nitrogen compound biosynthetic process;GO:0044238//primary metabolic process;GO:0035556//intracellular signal transduction;GO:0007165//signal transduction;GO:0034641//cellular nitrogen compound metabolic process;GO:0044763//single-organism cellular process;GO:0006412//translatio…
XP_005901440	0	60.5167	0.001	3.01333	11.5571	0.00770284	0.275279	no	YBX1	PREDICTED: nuclease-sensitive element-binding protein 1 [Bos mutus]	-	-	-	-	GO:0043227//membrane-bounded organelle;GO:0031967//organelle envelope;GO:0012505//endomembrane system;GO:0043234//protein complex;GO:0031974//membrane-enclosed lumen;GO:0005635//nuclear envelope;GO:0005576//extracellular region;GO:0005622//intracellular;GO:0044464//cell part;GO:1990904//ribonucleoprotein complex;GO:0043232//intracellular non-membrane-bounded organelle;GO:0030529//intracellular ri…	GO:0003700//transcription factor activity, sequence-specific DNA binding;GO:0000982//transcription factor activity, RNA polymerase II core promoter proximal region sequence-specific binding;GO:0097159//organic cyclic compound binding;GO:0000975//regulatory region DNA binding;GO:0001067//regulatory region nucleic acid binding;GO:0001012//RNA polymerase II regulatory region DNA binding;GO:0001071//…	GO:0044238//primary metabolic process;GO:0034641//cellular nitrogen compound metabolic process;GO:0090304//nucleic acid metabolic process;GO:0006396//RNA processing;GO:0065008//regulation of biological quality;GO:1901576//organic substance biosynthetic process;GO:1901360//organic cyclic compound metabolic process;GO:0008104//protein localization;GO:0000375//RNA splicing, via transesterification r…
XP_005908176	0	44.9867	0.001	3.00333	11.5523	0.00235116	0.168226	no	HMCES	PREDICTED: UPF0361 protein C3orf37 homolog [Bos mutus]	-	-	-	-	-	GO:0003824//catalytic activity;GO:0016787//hydrolase activity	GO:0008152//metabolic process;GO:0043170//macromolecule metabolic process;GO:0019538//protein metabolic process;GO:0044238//primary metabolic process;GO:0071704//organic substance metabolic process
XP_005912026	0	41.13	0.001	2.98667	11.5443	0.00222835	0.165864	no	MRM1	rRNA methyltransferase 1, mitochondrial [Bos taurus]	-	-	-	-	-	-	-
XP_005906237	0	11.2233	0.001	2.96333	11.533	0.0458557	0.532026	no	ZCCHC17	PREDICTED: nucleolar protein of 40 kDa isoform X6 [Bos mutus]	-	-	-	-	GO:1990904//ribonucleoprotein complex;GO:0044446//intracellular organelle part;GO:0044464//cell part;GO:0031981//nuclear lumen;GO:0070013//intracellular organelle lumen;GO:0005856//cytoskeleton;GO:0043227//membrane-bounded organelle;GO:0043226//organelle;GO:0005623//cell;GO:0043229//intracellular organelle;GO:0032991//macromolecular complex;GO:0005634//nucleus;GO:0043231//intracellular membrane-b…	GO:1901363//heterocyclic compound binding;GO:0097159//organic cyclic compound binding;GO:0003723//RNA binding;GO:0043167//ion binding;GO:0005488//binding;GO:0046872//metal ion binding;GO:0003676//nucleic acid binding;GO:0043169//cation binding;GO:0046914//transition metal ion binding	GO:0080134//regulation of response to stress;GO:0065007//biological regulation;GO:0071840//cellular component organization or biogenesis;GO:0006914//autophagy;GO:0043903//regulation of symbiosis, encompassing mutualism through parasitism;GO:0002697//regulation of immune effector process;GO:0044763//single-organism cellular process;GO:0050794//regulation of cellular process;GO:0000422//mitophagy;G…
XP_014333576	0	142.893	0.001	2.94333	11.5232	0.00231369	0.168226	no	CCAR2	PREDICTED: DBIRD complex subunit KIAA1967 homolog [Bos mutus]	-	-	-	-	GO:0043226//organelle;GO:0005739//mitochondrion;GO:0031974//membrane-enclosed lumen;GO:0032991//macromolecular complex;GO:0044424//intracellular part;GO:0044444//cytoplasmic part;GO:0005622//intracellular;GO:0030529//intracellular ribonucleoprotein complex;GO:0043234//protein complex;GO:0043233//organelle lumen;GO:0044422//organelle part;GO:0043231//intracellular membrane-bounded organelle;GO:004…	GO:0005488//binding;GO:0001098//basal transcription machinery binding;GO:0003723//RNA binding;GO:1901363//heterocyclic compound binding;GO:0098772//molecular function regulator;GO:0003676//nucleic acid binding;GO:0001099//basal RNA polymerase II transcription machinery binding;GO:0005515//protein binding;GO:0030234//enzyme regulator activity;GO:0097159//organic cyclic compound binding	GO:0030177//positive regulation of Wnt signaling pathway;GO:0007005//mitochondrion organization;GO:0022402//cell cycle process;GO:0006996//organelle organization;GO:0032434//regulation of proteasomal ubiquitin-dependent protein catabolic process;GO:0007154//cell communication;GO:0008152//metabolic process;GO:0044237//cellular metabolic process;GO:0097190//apoptotic signaling pathway;GO:0009987//c…
XP_005895527	0	47.2533	0.001	2.93667	11.52	0.010745	0.316508	no	ABHD4	PREDICTED: abhydrolase domain-containing protein 4 [Bos mutus]	-	-	-	-	-	-	-
XP_005903988	0	83.7433	0.001	2.93	11.5167	0.000455303	0.0752395	no	WDR20	PREDICTED: WD repeat-containing protein 20 isoform X3 [Bos mutus]	-	-	-	-	-	-	-
XP_014336500	0	14.3867	0.001	2.92	11.5118	0.0151997	0.36077	no	CD81	CD81 antigen, partial [Bos mutus]	Organismal Systems	Immune system	ko04662//B cell receptor signaling pathway	K06508	GO:0016020//membrane;GO:0044425//membrane part;GO:0005912//adherens junction;GO:0044459//plasma membrane part;GO:0043227//membrane-bounded organelle;GO:0070161//anchoring junction;GO:0030054//cell junction;GO:0031224//intrinsic component of membrane;GO:0043226//organelle;GO:0005623//cell;GO:0005924//cell-substrate adherens junction;GO:1903561//extracellular vesicle;GO:0071944//cell periphery;GO:0…	GO:0005488//binding;GO:0003823//antigen binding;GO:0023023//MHC protein complex binding;GO:0005102//receptor binding;GO:0005515//protein binding;GO:0044877//macromolecular complex binding;GO:0032403//protein complex binding	GO:0051716//cellular response to stimulus;GO:0070727//cellular macromolecule localization;GO:0040012//regulation of locomotion;GO:1901362//organic cyclic compound biosynthetic process;GO:0044271//cellular nitrogen compound biosynthetic process;GO:0006139//nucleobase-containing compound metabolic process;GO:0023052//signaling;GO:0009058//biosynthetic process;GO:0018130//heterocycle biosynthetic pr…
XP_005887522	0	11.7633	0.001	2.9	11.5018	0.0448723	0.529302	no	IFT27	intraflagellar transport protein 27 homolog [Bos taurus]	-	-	-	-	GO:0097223//sperm part;GO:0042995//cell projection;GO:0015630//microtubule cytoskeleton;GO:0005815//microtubule organizing center;GO:0005856//cytoskeleton;GO:0043228//non-membrane-bounded organelle;GO:0032991//macromolecular complex;GO:0031514//motile cilium;GO:0044446//intracellular organelle part;GO:0030990//intraciliary transport particle;GO:0044424//intracellular part;GO:0043234//protein comp…	GO:0036094//small molecule binding;GO:0005488//binding	GO:0023052//signaling;GO:0015031//protein transport;GO:0050896//response to stimulus;GO:0007166//cell surface receptor signaling pathway;GO:0031503//protein complex localization;GO:0009987//cellular process;GO:0008104//protein localization;GO:0050789//regulation of biological process;GO:0044700//single organism signaling;GO:0007154//cell communication;GO:0033036//macromolecule localization;GO:000…
XP_005898291	0	80.6267	0.001	2.88333	11.4935	3.8e-06	0.00270172	up	KDM1B	PREDICTED: lysine-specific histone demethylase 1B [Bos mutus]	-	-	-	-	GO:0043227//membrane-bounded organelle;GO:0044464//cell part;GO:0044428//nuclear part;GO:0043233//organelle lumen;GO:0044422//organelle part;GO:0005622//intracellular;GO:0043229//intracellular organelle;GO:0005634//nucleus;GO:0031974//membrane-enclosed lumen;GO:0070013//intracellular organelle lumen;GO:0044424//intracellular part;GO:0043231//intracellular membrane-bounded organelle;GO:0044446//in…	GO:1901265//nucleoside phosphate binding;GO:0032453//histone demethylase activity (H3-K4 specific);GO:0016705//oxidoreductase activity, acting on paired donors, with incorporation or reduction of molecular oxygen;GO:0016491//oxidoreductase activity;GO:0043169//cation binding;GO:0046914//transition metal ion binding;GO:1901363//heterocyclic compound binding;GO:0046872//metal ion binding;GO:0032451…	GO:0016577//histone demethylation;GO:0008214//protein dealkylation;GO:0090304//nucleic acid metabolic process;GO:0044271//cellular nitrogen compound biosynthetic process;GO:1901360//organic cyclic compound metabolic process;GO:0016570//histone modification;GO:0034645//cellular macromolecule biosynthetic process;GO:0071840//cellular component organization or biogenesis;GO:0044699//single-organism …
XP_005905355	0	40.0867	0.001	2.88333	11.4935	0.00381307	0.208092	no	PPP1R3C	protein phosphatase 1 regulatory subunit 3C [Bos taurus]	Organismal Systems	Endocrine system	ko04910//Insulin signaling pathway	K07189	-	GO:0005515//protein binding;GO:0019902//phosphatase binding;GO:0019899//enzyme binding;GO:0098772//molecular function regulator;GO:0019208//phosphatase regulator activity;GO:0005488//binding;GO:0030234//enzyme regulator activity	GO:0044264//cellular polysaccharide metabolic process;GO:0044042//glucan metabolic process;GO:0006112//energy reserve metabolic process;GO:0015980//energy derivation by oxidation of organic compounds;GO:0005975//carbohydrate metabolic process;GO:0005977//glycogen metabolic process;GO:0065009//regulation of molecular function;GO:0009987//cellular process;GO:0006091//generation of precursor metabol…
XP_005898192	0	62.7	0.001	2.87	11.4868	0.00737304	0.274416	no	LOC102281629	PREDICTED: cytochrome b-c1 complex subunit 2, mitochondrial-like [Bos mutus]	Organismal Systems;Metabolism	Circulatory system;Energy metabolism	ko00190//Oxidative phosphorylation;ko04260//Cardiac muscle contraction	K00415	GO:0031090//organelle membrane;GO:0043227//membrane-bounded organelle;GO:0031967//organelle envelope;GO:0031981//nuclear lumen;GO:0031975//envelope;GO:0016020//membrane;GO:0043230//extracellular organelle;GO:0005737//cytoplasm;GO:0043229//intracellular organelle;GO:0044421//extracellular region part;GO:0044424//intracellular part;GO:0043233//organelle lumen;GO:0044428//nuclear part;GO:0044444//cy…	GO:0070011//peptidase activity, acting on L-amino acid peptides;GO:0003824//catalytic activity;GO:0016787//hydrolase activity;GO:0008233//peptidase activity;GO:0004175//endopeptidase activity;GO:0043169//cation binding;GO:0005488//binding;GO:0043167//ion binding	GO:0055114//oxidation-reduction process;GO:0008152//metabolic process;GO:0044710//single-organism metabolic process;GO:0071704//organic substance metabolic process;GO:0043170//macromolecule metabolic process;GO:0044238//primary metabolic process;GO:0019538//protein metabolic process;GO:0044699//single-organism process
XP_014333561	0	13.9733	0.001	2.85	11.4767	0.0367344	0.496068	no	LOC102283864	PREDICTED: UPF0193 protein EVG1 isoform X1 [Bos mutus]	-	-	-	-	-	-	-
XP_005905113	0.00666667	107.717	0.001	2.83667	11.47	0.00347791	0.198873	no	SAMD4A	PREDICTED: LOW QUALITY PROTEIN: protein Smaug homolog 1 [Bos mutus]	-	-	-	-	-	GO:0097159//organic cyclic compound binding;GO:1901363//heterocyclic compound binding;GO:0003723//RNA binding;GO:0005488//binding;GO:0003676//nucleic acid binding;GO:0045182//translation regulator activity	GO:0010467//gene expression;GO:0044249//cellular biosynthetic process;GO:0032774//RNA biosynthetic process;GO:0006807//nitrogen compound metabolic process;GO:0044267//cellular protein metabolic process;GO:0006351//transcription, DNA-templated;GO:0043604//amide biosynthetic process;GO:0044271//cellular nitrogen compound biosynthetic process;GO:0018130//heterocycle biosynthetic process;GO:1901362//…
XP_005901727	0	16.0467	0.001	2.81	11.4564	0.0093672	0.299967	no	TSPAN31	tetraspanin-31 [Bos taurus]	-	-	-	-	-	-	-
XP_014337793	0	44.04	0.001	2.81	11.4564	0.0119309	0.331671	no	INPP5A	Type I inositol-1,4,5-trisphosphate 5-phosphatase, partial [Bos mutus]	Metabolism;Environmental Information Processing	Carbohydrate metabolism;Signal transduction	ko04070//Phosphatidylinositol signaling system;ko00562//Inositol phosphate metabolism	K01106	GO:0005576//extracellular region;GO:1903561//extracellular vesicle;GO:0043226//organelle;GO:0044421//extracellular region part;GO:0043230//extracellular organelle;GO:0043227//membrane-bounded organelle;GO:0031982//vesicle	GO:0005515//protein binding;GO:0005488//binding;GO:0019904//protein domain specific binding	GO:0006650//glycerophospholipid metabolic process;GO:0044237//cellular metabolic process;GO:0046486//glycerolipid metabolic process;GO:0009987//cellular process;GO:0006629//lipid metabolic process;GO:0071704//organic substance metabolic process;GO:0019637//organophosphate metabolic process;GO:0044763//single-organism cellular process;GO:0006796//phosphate-containing compound metabolic process;GO:…
XP_005888665	0	49.14	0.001	2.80667	11.4546	2.1e-05	0.0103948	up	CASC4	PREDICTED: protein CASC4 isoform X1 [Bos taurus]	-	-	-	-	GO:0016020//membrane;GO:0031224//intrinsic component of membrane;GO:0044425//membrane part	-	-
XP_005904651	0	41.5367	0.001	2.80667	11.4546	0.00192874	0.156346	no	CA3	PREDICTED: carbonic anhydrase 3 [Bos mutus]	Metabolism	Energy metabolism	ko00910//Nitrogen metabolism	K01672	GO:0044464//cell part;GO:0044424//intracellular part;GO:0005622//intracellular;GO:0044444//cytoplasmic part;GO:0005623//cell;GO:0005737//cytoplasm	GO:0046872//metal ion binding;GO:0046914//transition metal ion binding;GO:0003824//catalytic activity;GO:0043169//cation binding;GO:0043167//ion binding;GO:0005488//binding	GO:0008152//metabolic process;GO:0044237//cellular metabolic process;GO:0009987//cellular process
XP_005906045	0	139.073	0.001	2.80667	11.4546	0.00018404	0.0466197	up	TBC1D2	PREDICTED: TBC1 domain family member 2A [Bos mutus]	-	-	-	-	GO:0044424//intracellular part;GO:0005623//cell;GO:0005622//intracellular;GO:0044464//cell part;GO:0005737//cytoplasm	GO:0050839//cell adhesion molecule binding;GO:0005515//protein binding;GO:0005488//binding	GO:0051336//regulation of hydrolase activity;GO:0043087//regulation of GTPase activity;GO:0065009//regulation of molecular function;GO:0050790//regulation of catalytic activity;GO:0065007//biological regulation
XP_014335999	0	19.62	0.001	2.79333	11.4478	0.00755434	0.274565	no	RAC1	Ras-related C3 botulinum toxin substrate 1, partial [Bos mutus]	Organismal Systems;Cellular Processes;Environmental Information Processing	Cellular commiunity;Digestive system;Transport and catabolism;Signal transduction;Nervous system;Development;Cell motility;Immune system	ko04151//PI3K-Akt signaling pathway;ko04010//MAPK signaling pathway;ko04014//Ras signaling pathway;ko04510//Focal adhesion;ko04810//Regulation of actin cytoskeleton;ko04024//cAMP signaling pathway;ko04015//Rap1 signaling pathway;ko04062//Chemokine signaling pathway;ko04145//Phagosome;ko04360//Axon guidance;ko04310//Wnt signaling pathway;ko04722//Neurotrophin signaling pathway;ko04071//Sphingolipi…	K04392	GO:0005623//cell;GO:1903561//extracellular vesicle;GO:0030055//cell-substrate junction;GO:0001726//ruffle;GO:0044424//intracellular part;GO:0042995//cell projection;GO:0043231//intracellular membrane-bounded organelle;GO:0016020//membrane;GO:0031252//cell leading edge;GO:0043227//membrane-bounded organelle;GO:0043228//non-membrane-bounded organelle;GO:0097708//intracellular vesicle;GO:0043226//or…	GO:0097159//organic cyclic compound binding;GO:0032549//ribonucleoside binding;GO:0016817//hydrolase activity, acting on acid anhydrides;GO:0001883//purine nucleoside binding;GO:0036094//small molecule binding;GO:0003824//catalytic activity;GO:0019900//kinase binding;GO:0019899//enzyme binding;GO:0051021//GDP-dissociation inhibitor binding;GO:0001882//nucleoside binding;GO:0016818//hydrolase acti…	GO:0008152//metabolic process;GO:0065009//regulation of molecular function;GO:0006461//protein complex assembly;GO:0051246//regulation of protein metabolic process;GO:0010810//regulation of cell-substrate adhesion;GO:0070271//protein complex biogenesis;GO:0048562//embryonic organ morphogenesis;GO:0051249//regulation of lymphocyte activation;GO:0050778//positive regulation of immune response;GO:00…
XP_005889084	0	94.6333	0.001	2.75667	11.4287	0.000435117	0.0732865	no	DZANK1	PREDICTED: double zinc ribbon and ankyrin repeat-containing protein 1 [Bos mutus]	-	-	-	-	-	-	-
XP_005906413	0	44.9133	0.001	2.75	11.4252	0.0116004	0.327354	no	VPS26A	PREDICTED: LOW QUALITY PROTEIN: vacuolar protein sorting-associated protein 26A [Bos mutus]	Cellular Processes	Transport and catabolism	ko04144//Endocytosis	K18466	-	-	-
XP_014332087	0	47.5167	0.001	2.73667	11.4182	2.52e-05	0.0118657	up	TM2D3	PREDICTED: TM2 domain-containing protein 3 [Bos mutus]	-	-	-	-	GO:0031224//intrinsic component of membrane;GO:0044425//membrane part;GO:0016020//membrane	-	-
XP_005911371	0	22.1633	0.001	2.67667	11.3862	0.00634603	0.262057	no	TRMU	PREDICTED: mitochondrial tRNA-specific 2-thiouridylase 1 isoform X2 [Bos mutus]	Genetic Information Processing	Folding, sorting and degradation	ko04122//Sulfur relay system	K00566	-	-	-
XP_005888295	0	152.37	0.001	2.64	11.3663	0.000232031	0.0551729	no	MYO1C	unconventional myosin-Ic [Bos taurus]	-	-	-	-	GO:0044464//cell part;GO:0031981//nuclear lumen;GO:0044444//cytoplasmic part;GO:0043230//extracellular organelle;GO:0005623//cell;GO:0016323//basolateral plasma membrane;GO:0005886//plasma membrane;GO:0098589//membrane region;GO:0044430//cytoskeletal part;GO:0016461//unconventional myosin complex;GO:0005737//cytoplasm;GO:0044459//plasma membrane part;GO:0043234//protein complex;GO:0031253//cell p…	GO:0005488//binding;GO:0097159//organic cyclic compound binding;GO:0016817//hydrolase activity, acting on acid anhydrides;GO:0031267//small GTPase binding;GO:0017111//nucleoside-triphosphatase activity;GO:0036094//small molecule binding;GO:0032549//ribonucleoside binding;GO:0016462//pyrophosphatase activity;GO:0051020//GTPase binding;GO:0016787//hydrolase activity;GO:0032550//purine ribonucleosid…	GO:0070727//cellular macromolecule localization;GO:0044763//single-organism cellular process;GO:0051128//regulation of cellular component organization;GO:0010647//positive regulation of cell communication;GO:0046907//intracellular transport;GO:0044087//regulation of cellular component biogenesis;GO:1902580//single-organism cellular localization;GO:0023051//regulation of signaling;GO:0048522//posi…
XP_005903826	0	158.707	0.001	2.64	11.3663	7.33e-08	0.00011854	up	DSEL	PREDICTED: dermatan-sulfate epimerase-like protein [Bos mutus]	-	-	-	-	GO:0031224//intrinsic component of membrane;GO:0044425//membrane part;GO:0016020//membrane	GO:0003824//catalytic activity;GO:0016854//racemase and epimerase activity;GO:0016857//racemase and epimerase activity, acting on carbohydrates and derivatives;GO:0016853//isomerase activity	GO:0044237//cellular metabolic process;GO:0008152//metabolic process;GO:0006790//sulfur compound metabolic process;GO:0009987//cellular process
XP_005891619	0	128.487	0.001	2.63667	11.3645	0.00274494	0.180515	no	MTHFD1L	PREDICTED: monofunctional C1-tetrahydrofolate synthase, mitochondrial-like [Bos mutus]	Metabolism	Metabolism of cofactors and vitamins	ko00670//One carbon pool by folate	K13402	GO:0043231//intracellular membrane-bounded organelle;GO:0044464//cell part;GO:0043227//membrane-bounded organelle;GO:0005622//intracellular;GO:0043229//intracellular organelle;GO:0044424//intracellular part;GO:0043226//organelle;GO:0005623//cell	GO:0001882//nucleoside binding;GO:0032549//ribonucleoside binding;GO:0016879//ligase activity, forming carbon-nitrogen bonds;GO:0016646//oxidoreductase activity, acting on the CH-NH group of donors, NAD or NADP as acceptor;GO:0097367//carbohydrate derivative binding;GO:0005488//binding;GO:0001883//purine nucleoside binding;GO:0016645//oxidoreductase activity, acting on the CH-NH group of donors;G…	GO:0044281//small molecule metabolic process;GO:0051186//cofactor metabolic process;GO:0044707//single-multicellular organism process;GO:0009987//cellular process;GO:1901564//organonitrogen compound metabolic process;GO:0032501//multicellular organismal process;GO:0006760//folic acid-containing compound metabolic process;GO:0044767//single-organism developmental process;GO:0006575//cellular modif…
XP_005895995	0	107.953	0.001	2.62667	11.359	0.003463	0.198452	no	CEP85	PREDICTED: centrosomal protein of 85 kDa [Bos mutus]	-	-	-	-	-	-	-
XP_005905636	0	167.853	0.001	2.62	11.3554	5.47e-09	1.48e-05	up	TNIK	PREDICTED: traf2 and NCK-interacting protein kinase isoform X2 [Bos mutus]	-	-	-	-	-	-	-
XP_005896441	0	15.31	0.001	2.61	11.3498	0.0409145	0.515075	no	ARF3	ADP-ribosylation factor 3 [Homo sapiens]	Cellular Processes	Transport and catabolism	ko04144//Endocytosis	K07938	GO:0043226//organelle;GO:1903561//extracellular vesicle;GO:0043231//intracellular membrane-bounded organelle;GO:0005623//cell;GO:0005622//intracellular;GO:0044444//cytoplasmic part;GO:0005794//Golgi apparatus;GO:0044421//extracellular region part;GO:0044424//intracellular part;GO:0043229//intracellular organelle;GO:0031982//vesicle;GO:0005737//cytoplasm;GO:0044464//cell part;GO:0043230//extracell…	GO:0016462//pyrophosphatase activity;GO:0003824//catalytic activity;GO:0097159//organic cyclic compound binding;GO:0016787//hydrolase activity;GO:0016818//hydrolase activity, acting on acid anhydrides, in phosphorus-containing anhydrides;GO:0032549//ribonucleoside binding;GO:0017111//nucleoside-triphosphatase activity;GO:0001883//purine nucleoside binding;GO:0097367//carbohydrate derivative bindi…	GO:0050789//regulation of biological process;GO:0044711//single-organism biosynthetic process;GO:0044699//single-organism process;GO:0006796//phosphate-containing compound metabolic process;GO:0007165//signal transduction;GO:0008104//protein localization;GO:0006644//phospholipid metabolic process;GO:0006629//lipid metabolic process;GO:0046474//glycerophospholipid biosynthetic process;GO:1901576//…
XP_005892992	0	270.367	0.001	2.60333	11.3461	3.61e-05	0.015682	up	ARFGEF1	PREDICTED: brefeldin A-inhibited guanine nucleotide-exchange protein 1 [Bos mutus]	Cellular Processes	Transport and catabolism	ko04144//Endocytosis	K18442	-	-	-
XP_014334200	0	140.79	0.001	2.6	11.3443	0.000132354	0.0380065	up	ATXN2	PREDICTED: ataxin-2 [Capra hircus]	-	-	-	-	-	-	-
XP_014332667	0	84.5667	0.001	2.59	11.3387	0.000423186	0.0724359	no	VPS9D1	PREDICTED: VPS9 domain-containing protein 1 [Bos mutus]	-	-	-	-	-	-	-
XP_005896590	0	148.007	0.001	2.58667	11.3369	0.00218623	0.165781	no	SLC12A4	PREDICTED: solute carrier family 12 member 4 isoform X2 [Bos mutus]	-	-	-	-	-	-	-
XP_005908089	0	128.173	0.001	2.58667	11.3369	0.00274556	0.180515	no	EXOC2	PREDICTED: exocyst complex component 2 [Bos mutus]	Environmental Information Processing	Signal transduction	ko04014//Ras signaling pathway	K17637	-	-	-
XP_005906289	0	15.9167	0.001	2.57667	11.3313	0.031645	0.470399	no	AK2	PREDICTED: adenylate kinase 2, mitochondrial isoform X1 [Bos taurus]	Metabolism	Nucleotide metabolism	ko00230//Purine metabolism	K00939	GO:0043231//intracellular membrane-bounded organelle;GO:0044421//extracellular region part;GO:0044446//intracellular organelle part;GO:0019866//organelle inner membrane;GO:0005737//cytoplasm;GO:0005740//mitochondrial envelope;GO:0044422//organelle part;GO:0044429//mitochondrial part;GO:0036126//sperm flagellum;GO:0097223//sperm part;GO:0042995//cell projection;GO:0005739//mitochondrion;GO:0005623…	GO:0001882//nucleoside binding;GO:0001883//purine nucleoside binding;GO:0003824//catalytic activity;GO:0016776//phosphotransferase activity, phosphate group as acceptor;GO:0005488//binding;GO:0016772//transferase activity, transferring phosphorus-containing groups;GO:0016740//transferase activity;GO:0032550//purine ribonucleoside binding;GO:0032549//ribonucleoside binding;GO:0097159//organic cycl…	GO:0072521//purine-containing compound metabolic process;GO:1901293//nucleoside phosphate biosynthetic process;GO:0044238//primary metabolic process;GO:0006807//nitrogen compound metabolic process;GO:1901360//organic cyclic compound metabolic process;GO:1901576//organic substance biosynthetic process;GO:0019438//aromatic compound biosynthetic process;GO:1901566//organonitrogen compound biosynthet…
XP_005898985	0	291.957	0.001	2.54333	11.3125	0.00080165	0.0986574	no	CKAP5	PREDICTED: cytoskeleton-associated protein 5 [Bos mutus]	-	-	-	-	GO:0044464//cell part;GO:0043234//protein complex;GO:0005874//microtubule;GO:0043232//intracellular non-membrane-bounded organelle;GO:0005856//cytoskeleton;GO:0043226//organelle;GO:0099080//supramolecular complex;GO:0032991//macromolecular complex;GO:0044446//intracellular organelle part;GO:0044430//cytoskeletal part;GO:0043228//non-membrane-bounded organelle;GO:0005815//microtubule organizing ce…	-	GO:0006996//organelle organization;GO:0016043//cellular component organization;GO:0007017//microtubule-based process;GO:0009987//cellular process;GO:1902589//single-organism organelle organization;GO:0007010//cytoskeleton organization;GO:0071840//cellular component organization or biogenesis;GO:0044699//single-organism process;GO:0044763//single-organism cellular process;GO:0031023//microtubule o…
XP_005899514	0	25.82	0.001	2.50333	11.2896	0.0182256	0.385415	no	ATF4	PREDICTED: cyclic AMP-dependent transcription factor ATF-4 [Bos mutus]	Genetic Information Processing;Environmental Information Processing;Organismal Systems	Folding, sorting and degradation;Endocrine system;Circulatory system;Signal transduction;Nervous system	ko04151//PI3K-Akt signaling pathway;ko04010//MAPK signaling pathway;ko04261//Adrenergic signaling in cardiomyocytes;ko04022//cGMP - PKG signaling pathway;ko04141//Protein processing in endoplasmic reticulum;ko04728//Dopaminergic synapse;ko04722//Neurotrophin signaling pathway;ko04922//Glucagon signaling pathway;ko04668//TNF signaling pathway;ko04725//Cholinergic synapse;ko04915//Estrogen signalin…	K04374	-	-	-
XP_005906645	0	16.5267	0.001	2.50333	11.2896	0.0301031	0.460127	no	LOC102273755	LOC781500 protein [Bos taurus]	-	-	-	-	-	-	-
XP_005899186	0	172.9	0.001	2.47	11.2703	0.00175342	0.151301	no	UPF2	PREDICTED: regulator of nonsense transcripts 2 [Bos mutus]	Genetic Information Processing	Translation	ko03013//RNA transport;ko03015//mRNA surveillance pathway	K14327	GO:0043229//intracellular organelle;GO:0005622//intracellular;GO:0043226//organelle;GO:0032991//macromolecular complex;GO:0043231//intracellular membrane-bounded organelle;GO:0043234//protein complex;GO:0044424//intracellular part;GO:0043227//membrane-bounded organelle;GO:0005623//cell;GO:0044464//cell part	GO:0005488//binding;GO:1901363//heterocyclic compound binding;GO:0003676//nucleic acid binding;GO:0097159//organic cyclic compound binding	GO:0048513//animal organ development;GO:0048732//gland development;GO:0044767//single-organism developmental process;GO:0048856//anatomical structure development;GO:0032502//developmental process;GO:0048731//system development;GO:0031099//regeneration;GO:0032501//multicellular organismal process;GO:0007275//multicellular organism development;GO:0044707//single-multicellular organism process;GO:00…
XP_005891254	0	177.47	0.001	2.46	11.2644	7.14e-05	0.0255286	up	CLUH	PREDICTED: clustered mitochondria protein homolog [Bos mutus]	-	-	-	-	GO:0044464//cell part;GO:0005622//intracellular;GO:0005623//cell;GO:0044424//intracellular part	GO:0044822//poly(A) RNA binding;GO:0003723//RNA binding;GO:0005488//binding;GO:1901363//heterocyclic compound binding;GO:0003676//nucleic acid binding;GO:0097159//organic cyclic compound binding	GO:0071840//cellular component organization or biogenesis;GO:0009987//cellular process;GO:0051179//localization;GO:0051640//organelle localization;GO:0051646//mitochondrion localization;GO:0051641//cellular localization;GO:0016043//cellular component organization;GO:0048311//mitochondrion distribution;GO:0006996//organelle organization;GO:0007005//mitochondrion organization
XP_005906432	0	19.29	0.001	2.44	11.2527	0.000738773	0.0960954	no	IZUMO3	PREDICTED: izumo sperm-egg fusion protein 3-like isoform X1 [Bos mutus]	-	-	-	-	GO:0016020//membrane;GO:0031224//intrinsic component of membrane;GO:0044425//membrane part	GO:0005515//protein binding;GO:0046983//protein dimerization activity;GO:0005488//binding	-
XP_005904799	0	72.5967	0.001	2.43333	11.2487	0.00600194	0.255801	no	PLBD2	Phospholipase B domain containing 2 [Homo sapiens]	-	-	-	-	GO:0031982//vesicle;GO:0043227//membrane-bounded organelle;GO:0000323//lytic vacuole;GO:0044421//extracellular region part;GO:0005773//vacuole;GO:0005764//lysosome;GO:0044424//intracellular part;GO:1903561//extracellular vesicle;GO:0005576//extracellular region;GO:0005623//cell;GO:0005737//cytoplasm;GO:0044464//cell part;GO:0043231//intracellular membrane-bounded organelle;GO:0043229//intracellul…	GO:0003824//catalytic activity	GO:0008152//metabolic process;GO:0044238//primary metabolic process;GO:0044710//single-organism metabolic process;GO:0071704//organic substance metabolic process;GO:0006629//lipid metabolic process;GO:0044699//single-organism process
XP_005903733	0.0233333	87.0133	0.001	2.43	11.2467	0.000359459	0.0667477	no	PAPOLA	PREDICTED: poly(A) polymerase alpha isoform X2 [Bos mutus]	Genetic Information Processing	Translation	ko03015//mRNA surveillance pathway	K14376	-	-	-
XP_005910288	0	134.487	0.001	2.42333	11.2428	0.000153723	0.0422534	up	PPP1R12A	PREDICTED: protein phosphatase 1 regulatory subunit 12A isoform X1 [Bos mutus]	Environmental Information Processing;Cellular Processes;Organismal Systems	Immune system;Endocrine system;Circulatory system;Signal transduction;Cellular commiunity;Cell motility	ko04510//Focal adhesion;ko04810//Regulation of actin cytoskeleton;ko04024//cAMP signaling pathway;ko04022//cGMP - PKG signaling pathway;ko04921//Oxytocin signaling pathway;ko04270//Vascular smooth muscle contraction;ko04611//Platelet activation	K06270	GO:0031674//I band;GO:0044422//organelle part;GO:0043232//intracellular non-membrane-bounded organelle;GO:0044464//cell part;GO:0044444//cytoplasmic part;GO:0044427//chromosomal part;GO:0044430//cytoskeletal part;GO:0030017//sarcomere;GO:0005856//cytoskeleton;GO:0031974//membrane-enclosed lumen;GO:0005622//intracellular;GO:0008287//protein serine/threonine phosphatase complex;GO:0015630//microtub…	GO:0005515//protein binding;GO:0016787//hydrolase activity;GO:0016791//phosphatase activity;GO:0019900//kinase binding;GO:0098772//molecular function regulator;GO:0016788//hydrolase activity, acting on ester bonds;GO:0030234//enzyme regulator activity;GO:0042578//phosphoric ester hydrolase activity;GO:0019899//enzyme binding;GO:0003824//catalytic activity;GO:0005488//binding	GO:0042493//response to drug;GO:0035306//positive regulation of dephosphorylation;GO:0010921//regulation of phosphatase activity;GO:0010467//gene expression;GO:0044260//cellular macromolecule metabolic process;GO:0042221//response to chemical;GO:0045937//positive regulation of phosphate metabolic process;GO:0046483//heterocycle metabolic process;GO:0016070//RNA metabolic process;GO:0001885//endot…
XP_014334151	0	81.2367	0.001	2.42333	11.2428	0.00040314	0.0702463	no	ACOT11	PREDICTED: acyl-coenzyme A thioesterase 11 [Bos mutus]	-	-	-	-	GO:1903561//extracellular vesicle;GO:0043230//extracellular organelle;GO:0043227//membrane-bounded organelle;GO:0031982//vesicle;GO:0043226//organelle;GO:0044421//extracellular region part;GO:0005576//extracellular region	-	GO:0006950//response to stress;GO:0050896//response to stimulus;GO:0009628//response to abiotic stimulus
XP_005899990	0	65.58	0.001	2.41	11.2348	1.57e-05	0.00831126	up	LZTS1	leucine-zipper protein FEZ1 [Mus musculus]	-	-	-	-	GO:0098590//plasma membrane region;GO:0045202//synapse;GO:0060076//excitatory synapse;GO:0005623//cell;GO:0044424//intracellular part;GO:0042995//cell projection;GO:0016020//membrane;GO:0071944//cell periphery;GO:0005886//plasma membrane;GO:0043005//neuron projection;GO:0044425//membrane part;GO:0044464//cell part;GO:0036477//somatodendritic compartment;GO:0097060//synaptic membrane;GO:0044456//s…	GO:0001071//nucleic acid binding transcription factor activity;GO:0008092//cytoskeletal protein binding;GO:0015631//tubulin binding;GO:0005488//binding;GO:0005515//protein binding	GO:0010506//regulation of autophagy;GO:0090304//nucleic acid metabolic process;GO:0043170//macromolecule metabolic process;GO:1901360//organic cyclic compound metabolic process;GO:0044238//primary metabolic process;GO:0006351//transcription, DNA-templated;GO:0034641//cellular nitrogen compound metabolic process;GO:0016070//RNA metabolic process;GO:0044237//cellular metabolic process;GO:0044763//s…
XP_014336384	0	74.74	0.001	2.41	11.2348	0.00578425	0.251833	no	KLC1	PREDICTED: kinesin light chain 1 isoform X6 [Bos taurus]	-	-	-	-	GO:0043234//protein complex;GO:0043228//non-membrane-bounded organelle;GO:0043005//neuron projection;GO:0044464//cell part;GO:0044422//organelle part;GO:0005622//intracellular;GO:0044446//intracellular organelle part;GO:0042995//cell projection;GO:0044444//cytoplasmic part;GO:0032991//macromolecular complex;GO:0005737//cytoplasm;GO:0043232//intracellular non-membrane-bounded organelle;GO:0043226/…	GO:0016787//hydrolase activity;GO:0016462//pyrophosphatase activity;GO:0003824//catalytic activity;GO:0016817//hydrolase activity, acting on acid anhydrides;GO:0017111//nucleoside-triphosphatase activity;GO:0005488//binding;GO:0016818//hydrolase activity, acting on acid anhydrides, in phosphorus-containing anhydrides	GO:0006810//transport;GO:0009987//cellular process;GO:0051179//localization;GO:0019884//antigen processing and presentation of exogenous antigen;GO:0071826//ribonucleoprotein complex subunit organization;GO:0051234//establishment of localization;GO:0019882//antigen processing and presentation;GO:0044763//single-organism cellular process;GO:0071840//cellular component organization or biogenesis;GO…
XP_005892676	0	104.237	0.001	2.4	11.2288	0.000643066	0.0905982	no	PPP4R3A	serine/threonine-protein phosphatase 4 regulatory subunit 3A [Bos taurus]	Organismal Systems	Endocrine system	ko04922//Glucagon signaling pathway	K17491	-	-	-
XP_005887582	0	44.62	0.001	2.38333	11.2188	0.00221484	0.165864	no	LOC102274416	PREDICTED: SEC14-like protein 3 [Bos mutus]	-	-	-	-	GO:0031224//intrinsic component of membrane;GO:0005623//cell;GO:0031982//vesicle;GO:0016020//membrane;GO:0043226//organelle;GO:0005576//extracellular region;GO:1903561//extracellular vesicle;GO:0043227//membrane-bounded organelle;GO:0044464//cell part;GO:0043230//extracellular organelle;GO:0044425//membrane part;GO:0044421//extracellular region part	-	GO:0051179//localization;GO:0051234//establishment of localization
XP_005889739	0	105.9	0.001	2.37667	11.2147	0.00356089	0.200994	no	ATG9A	autophagy-related protein 9A [Bos taurus]	-	-	-	-	-	-	-
XP_005889740	0	105.9	0.001	2.37667	11.2147	0.00356073	0.200994	no	ATG9A	autophagy-related protein 9A [Bos taurus]	-	-	-	-	-	-	-
XP_005892473	0	59.11	0.001	2.37667	11.2147	0.000909767	0.105347	no	BANP	PREDICTED: protein BANP isoform X2 [Bos mutus]	-	-	-	-	GO:0044446//intracellular organelle part;GO:0043233//organelle lumen;GO:0044428//nuclear part;GO:0044424//intracellular part;GO:0043227//membrane-bounded organelle;GO:0031981//nuclear lumen;GO:0005623//cell;GO:0005622//intracellular;GO:0044422//organelle part;GO:0043226//organelle;GO:0043231//intracellular membrane-bounded organelle;GO:0031974//membrane-enclosed lumen;GO:0043229//intracellular or…	GO:1901363//heterocyclic compound binding;GO:0097159//organic cyclic compound binding;GO:0005488//binding;GO:0003676//nucleic acid binding	GO:0044707//single-multicellular organism process;GO:0033036//macromolecule localization;GO:0043933//macromolecular complex subunit organization;GO:0043170//macromolecule metabolic process;GO:0065007//biological regulation;GO:0033365//protein localization to organelle;GO:0071840//cellular component organization or biogenesis;GO:0044271//cellular nitrogen compound biosynthetic process;GO:0051641//…
XM_005897553	0	133.653	0.001	2.37333	11.2127	8.57e-05	0.0285431	up	ZNF335	PREDICTED: Bos mutus zinc finger protein 335 (ZNF335), transcript variant X2, mRNA	-	-	-	-	GO:0043231//intracellular membrane-bounded organelle;GO:0034708//methyltransferase complex;GO:0005623//cell;GO:0005622//intracellular;GO:0032991//macromolecular complex;GO:0043227//membrane-bounded organelle;GO:0044464//cell part;GO:0044424//intracellular part;GO:0043229//intracellular organelle;GO:0043226//organelle	GO:1901363//heterocyclic compound binding;GO:0003676//nucleic acid binding;GO:0097159//organic cyclic compound binding;GO:0001067//regulatory region nucleic acid binding;GO:0043169//cation binding;GO:0043167//ion binding;GO:0005488//binding;GO:0000975//regulatory region DNA binding;GO:0003677//DNA binding	GO:0050793//regulation of developmental process;GO:0032259//methylation;GO:0018193//peptidyl-amino acid modification;GO:0043412//macromolecule modification;GO:0022008//neurogenesis;GO:0032268//regulation of cellular protein metabolic process;GO:0019222//regulation of metabolic process;GO:0051246//regulation of protein metabolic process;GO:0009653//anatomical structure morphogenesis;GO:0009887//an…
XP_005903007	0	169.517	0.001	2.37333	11.2127	0.00181107	0.153009	no	USP42	PREDICTED: ubiquitin carboxyl-terminal hydrolase 42 [Bos mutus]	-	-	-	-	-	GO:0019783//ubiquitin-like protein-specific protease activity;GO:0016787//hydrolase activity;GO:0003824//catalytic activity;GO:0008234//cysteine-type peptidase activity;GO:0070011//peptidase activity, acting on L-amino acid peptides;GO:0008233//peptidase activity	GO:0044267//cellular protein metabolic process;GO:0043632//modification-dependent macromolecule catabolic process;GO:0044703//multi-organism reproductive process;GO:0071704//organic substance metabolic process;GO:0032501//multicellular organismal process;GO:0006508//proteolysis;GO:0007276//gamete generation;GO:0044248//cellular catabolic process;GO:0048609//multicellular organismal reproductive p…
XM_005911098	0	26.1767	0.001	2.36333	11.2066	0.0223898	0.414123	no	LOC102271788	PREDICTED: Bos mutus somatotropin (LOC102271788), transcript variant X2, mRNA	Environmental Information Processing	Signaling molecules and interaction;Signal transduction	ko04151//PI3K-Akt signaling pathway;ko04080//Neuroactive ligand-receptor interaction;ko04060//Cytokine-cytokine receptor interaction;ko04630//Jak-STAT signaling pathway	K05438	GO:0016020//membrane;GO:0005623//cell;GO:0044424//intracellular part;GO:0012505//endomembrane system;GO:0005737//cytoplasm;GO:0044421//extracellular region part;GO:0005576//extracellular region;GO:0043227//membrane-bounded organelle;GO:0044464//cell part;GO:0044444//cytoplasmic part;GO:0005794//Golgi apparatus;GO:0005622//intracellular;GO:0043231//intracellular membrane-bounded organelle;GO:00432…	GO:0043167//ion binding;GO:0005488//binding;GO:0005126//cytokine receptor binding;GO:0005102//receptor binding;GO:0043169//cation binding;GO:0005515//protein binding	GO:0006695//cholesterol biosynthetic process;GO:0016053//organic acid biosynthetic process;GO:0046888//negative regulation of hormone secretion;GO:0032941//secretion by tissue;GO:0032868//response to insulin;GO:0006796//phosphate-containing compound metabolic process;GO:0048518//positive regulation of biological process;GO:0044255//cellular lipid metabolic process;GO:0019216//regulation of lipid …
XP_005909881	0	172.177	0.001	2.27667	11.1527	2.37e-07	0.000296046	up	NUP160	PREDICTED: nuclear pore complex protein Nup160 [Bos mutus]	Genetic Information Processing	Translation	ko03013//RNA transport	K14303	-	-	-
XP_005907933	0	233.16	0.001	2.25667	11.14	0.00112256	0.119899	no	ARID2	PREDICTED: LOW QUALITY PROTEIN: AT-rich interactive domain-containing protein 2 [Bos mutus]	-	-	-	-	GO:0043229//intracellular organelle;GO:0044428//nuclear part;GO:0070603//SWI/SNF superfamily-type complex;GO:0044422//organelle part;GO:0043234//protein complex;GO:0016020//membrane;GO:0044464//cell part;GO:0031974//membrane-enclosed lumen;GO:0043226//organelle;GO:0005622//intracellular;GO:0031981//nuclear lumen;GO:0070013//intracellular organelle lumen;GO:0043227//membrane-bounded organelle;GO:0…	GO:0005488//binding;GO:0043167//ion binding;GO:0043169//cation binding	GO:0018130//heterocycle biosynthetic process;GO:0009987//cellular process;GO:0071840//cellular component organization or biogenesis;GO:0071822//protein complex subunit organization;GO:0097659//nucleic acid-templated transcription;GO:0006725//cellular aromatic compound metabolic process;GO:0044249//cellular biosynthetic process;GO:0043170//macromolecule metabolic process;GO:0044237//cellular metab…
XM_005892114	0	31.28	0.001	2.23667	11.1271	0.0142486	0.357025	no	GNAI2	PREDICTED: Bos mutus guanine nucleotide binding protein (G protein), alpha inhibiting activity polypeptide 2 (GNAI2), transcript variant X1, mRNA	Cellular Processes;Organismal Systems;Environmental Information Processing	Immune system;Signal transduction;Nervous system;Environmental adaptation;Development;Digestive system;Endocrine system;Circulatory system;Cellular commiunity	ko04024//cAMP signaling pathway;ko04015//Rap1 signaling pathway;ko04261//Adrenergic signaling in cardiomyocytes;ko04022//cGMP - PKG signaling pathway;ko04062//Chemokine signaling pathway;ko04921//Oxytocin signaling pathway;ko04360//Axon guidance;ko04728//Dopaminergic synapse;ko04530//Tight junction;ko04071//Sphingolipid signaling pathway;ko04670//Leukocyte transendothelial migration;ko04611//Plat…	K04630	-	-	-
XP_005894153	0	106.59	0.001	2.23	11.1228	0.00353166	0.200204	no	PACS1	PREDICTED: phosphofurin acidic cluster sorting protein 1 [Bos mutus]	-	-	-	-	-	-	-
XP_005891738	0	40.6767	0.001	2.22667	11.1207	0.0133297	0.347977	no	MAT2A	PREDICTED: LOW QUALITY PROTEIN: S-adenosylmethionine synthase isoform type-2 [Bos mutus]	Metabolism	Global and Overview;Amino acid metabolism	ko01230//Biosynthesis of amino acids;ko00270//Cysteine and methionine metabolism	K00789	-	-	-
XM_005902990	0.0133333	98.3067	0.001	2.22333	11.1185	0.00298129	0.185624	no	PPP2R2A	PREDICTED: Bos mutus protein phosphatase 2, regulatory subunit B, alpha (PPP2R2A), transcript variant X1, mRNA	Organismal Systems;Cellular Processes;Environmental Information Processing;Genetic Information Processing	Translation;Cellular commiunity;Signal transduction;Nervous system;Circulatory system	ko04151//PI3K-Akt signaling pathway;ko04261//Adrenergic signaling in cardiomyocytes;ko04390//Hippo signaling pathway;ko04728//Dopaminergic synapse;ko04530//Tight junction;ko04152//AMPK signaling pathway;ko04071//Sphingolipid signaling pathway;ko03015//mRNA surveillance pathway	K04354	GO:0008287//protein serine/threonine phosphatase complex;GO:0031981//nuclear lumen;GO:0044444//cytoplasmic part;GO:0005634//nucleus;GO:0005737//cytoplasm;GO:1902494//catalytic complex;GO:0043233//organelle lumen;GO:0043229//intracellular organelle;GO:0044464//cell part;GO:0044446//intracellular organelle part;GO:0043231//intracellular membrane-bounded organelle;GO:1903293//phosphatase complex;GO:…	GO:0005488//binding;GO:0019902//phosphatase binding;GO:0019208//phosphatase regulator activity;GO:0005515//protein binding;GO:0098772//molecular function regulator;GO:0008168//methyltransferase activity;GO:0030234//enzyme regulator activity;GO:0019899//enzyme binding;GO:0008092//cytoskeletal protein binding;GO:0016788//hydrolase activity, acting on ester bonds;GO:0019888//protein phosphatase regu…	GO:0035304//regulation of protein dephosphorylation;GO:0009719//response to endogenous stimulus;GO:0050790//regulation of catalytic activity;GO:0044265//cellular macromolecule catabolic process;GO:0065009//regulation of molecular function;GO:0035303//regulation of dephosphorylation;GO:0009057//macromolecule catabolic process;GO:0042221//response to chemical;GO:0065007//biological regulation;GO:00…
XP_005894911	0	23.5433	0.001	2.22333	11.1185	0.00554457	0.246295	no	SPIN1	spindlin-1 [Bos taurus]	-	-	-	-	GO:0015630//microtubule cytoskeleton;GO:0070013//intracellular organelle lumen;GO:0031981//nuclear lumen;GO:0043233//organelle lumen;GO:0044446//intracellular organelle part;GO:0043232//intracellular non-membrane-bounded organelle;GO:0005623//cell;GO:0044422//organelle part;GO:0043227//membrane-bounded organelle;GO:0044464//cell part;GO:0043229//intracellular organelle;GO:0005856//cytoskeleton;GO…	GO:0005488//binding;GO:0005515//protein binding;GO:0042393//histone binding	GO:0048285//organelle fission;GO:0007166//cell surface receptor signaling pathway;GO:0016070//RNA metabolic process;GO:0044238//primary metabolic process;GO:0032501//multicellular organismal process;GO:0071704//organic substance metabolic process;GO:0009059//macromolecule biosynthetic process;GO:0044260//cellular macromolecule metabolic process;GO:0044703//multi-organism reproductive process;GO:0…
XP_005893122	0	46.19	0.001	2.22	11.1163	0.0111859	0.322273	no	NR6A1	PREDICTED: nuclear receptor subfamily 6 group A member 1 [Bos mutus]	-	-	-	-	GO:0044424//intracellular part;GO:0043234//protein complex;GO:0005623//cell;GO:0032991//macromolecular complex;GO:0043226//organelle;GO:0043227//membrane-bounded organelle;GO:0044464//cell part;GO:0043229//intracellular organelle;GO:0043231//intracellular membrane-bounded organelle;GO:0005622//intracellular	GO:0000982//transcription factor activity, RNA polymerase II core promoter proximal region sequence-specific binding;GO:0046983//protein dimerization activity;GO:1901363//heterocyclic compound binding;GO:0043167//ion binding;GO:0005515//protein binding;GO:0003690//double-stranded DNA binding;GO:0038023//signaling receptor activity;GO:0001067//regulatory region nucleic acid binding;GO:1990837//seq…	GO:0019438//aromatic compound biosynthetic process;GO:0000003//reproduction;GO:0043170//macromolecule metabolic process;GO:0009059//macromolecule biosynthetic process;GO:0071704//organic substance metabolic process;GO:0032870//cellular response to hormone stimulus;GO:0010467//gene expression;GO:0050789//regulation of biological process;GO:0034645//cellular macromolecule biosynthetic process;GO:00…
XP_005888282	0	89.2633	0.001	2.21667	11.1142	0.00454759	0.226623	no	ABR	PREDICTED: active breakpoint cluster region-related protein isoform X3 [Bos mutus]	-	-	-	-	-	-	-
XP_005892222	0	132.427	0.001	2.21667	11.1142	0.000115587	0.0353147	up	SECISBP2L	PREDICTED: LOW QUALITY PROTEIN: selenocysteine insertion sequence-binding protein 2-like [Bos mutus]	-	-	-	-	-	-	-
XP_005890027	0	23.2567	0.001	2.20667	11.1077	0.0067618	0.26743	no	LOC102275854	PREDICTED: very long-chain specific acyl-CoA dehydrogenase, mitochondrial-like, partial [Bos mutus]	Metabolism	Global and Overview;Lipid metabolism	ko01212//Fatty acid metabolism;ko00071//Fatty acid degradation	K09479	-	-	-
XP_005905977	0	71.6167	0.001	2.20667	11.1077	0.000698927	0.0937827	no	VIPR2	PREDICTED: vasoactive intestinal polypeptide receptor 2 [Bos mutus]	Environmental Information Processing	Signaling molecules and interaction;Signal transduction	ko04080//Neuroactive ligand-receptor interaction;ko04024//cAMP signaling pathway	K04590	GO:0031224//intrinsic component of membrane;GO:0016020//membrane;GO:0044425//membrane part	GO:0004888//transmembrane signaling receptor activity;GO:0004872//receptor activity;GO:0060089//molecular transducer activity;GO:0099600//transmembrane receptor activity;GO:0038023//signaling receptor activity;GO:0004871//signal transducer activity;GO:0004930//G-protein coupled receptor activity	GO:0044763//single-organism cellular process;GO:0023052//signaling;GO:0051716//cellular response to stimulus;GO:0007154//cell communication;GO:0050794//regulation of cellular process;GO:0050896//response to stimulus;GO:0044699//single-organism process;GO:0007165//signal transduction;GO:0044700//single organism signaling;GO:0065007//biological regulation;GO:0009987//cellular process;GO:0050789//re…
XP_005909015	0	173.607	0.001	2.19333	11.0989	1.47e-07	0.0001977	up	ATP7B	PREDICTED: copper-transporting ATPase 2 [Bos mutus]	-	-	-	-	-	-	-
XP_005891742	0	65.4767	0.001	2.18333	11.0923	3.1e-05	0.0140436	up	RETSAT	PREDICTED: all-trans-retinol 13,14-reductase [Bos mutus]	Metabolism	Metabolism of cofactors and vitamins	ko00830//Retinol metabolism	K09516	GO:0043226//organelle;GO:0016020//membrane;GO:0005634//nucleus;GO:0031967//organelle envelope;GO:0012505//endomembrane system;GO:0005623//cell;GO:0043227//membrane-bounded organelle;GO:0005622//intracellular;GO:0043229//intracellular organelle;GO:0044464//cell part;GO:0044422//organelle part;GO:0031975//envelope;GO:0044428//nuclear part;GO:0044424//intracellular part;GO:0042175//nuclear outer mem…	GO:0016627//oxidoreductase activity, acting on the CH-CH group of donors;GO:0003824//catalytic activity;GO:0016491//oxidoreductase activity	GO:0044699//single-organism process;GO:0001523//retinoid metabolic process;GO:0006721//terpenoid metabolic process;GO:0044255//cellular lipid metabolic process;GO:0006629//lipid metabolic process;GO:0016101//diterpenoid metabolic process;GO:0006720//isoprenoid metabolic process;GO:0008152//metabolic process;GO:0071704//organic substance metabolic process;GO:0044763//single-organism cellular proce…
XP_014334983	0	54.71	0.001	2.18333	11.0923	0.00152775	0.138659	no	PIP5K1B	PREDICTED: phosphatidylinositol 4-phosphate 5-kinase type-1 beta isoform X1 [Bos mutus]	Environmental Information Processing;Metabolism;Organismal Systems;Cellular Processes	Cell motility;Transport and catabolism;Signal transduction;Carbohydrate metabolism;Immune system	ko04144//Endocytosis;ko04810//Regulation of actin cytoskeleton;ko04070//Phosphatidylinositol signaling system;ko04666//Fc gamma R-mediated phagocytosis;ko00562//Inositol phosphate metabolism	K00889	GO:0005623//cell;GO:0031254//cell trailing edge;GO:0044464//cell part	GO:0016307//phosphatidylinositol phosphate kinase activity;GO:0016772//transferase activity, transferring phosphorus-containing groups;GO:0016740//transferase activity;GO:0016301//kinase activity;GO:0016773//phosphotransferase activity, alcohol group as acceptor;GO:0003824//catalytic activity	GO:0046488//phosphatidylinositol metabolic process;GO:0044255//cellular lipid metabolic process;GO:0046486//glycerolipid metabolic process;GO:0006644//phospholipid metabolic process;GO:0044710//single-organism metabolic process;GO:0044237//cellular metabolic process;GO:0006793//phosphorus metabolic process;GO:0019637//organophosphate metabolic process;GO:0044763//single-organism cellular process;…
XP_005892554	0	19.9233	0.001	2.17667	11.0879	0.000682347	0.0933785	no	KCNMB2	PREDICTED: calcium-activated potassium channel subunit beta-2 isoform X2 [Bos mutus]	Organismal Systems;Environmental Information Processing	Signal transduction;Circulatory system;Endocrine system	ko04022//cGMP - PKG signaling pathway;ko04270//Vascular smooth muscle contraction;ko04911//Insulin secretion	K04938	GO:0016021//integral component of membrane;GO:0031224//intrinsic component of membrane;GO:0031226//intrinsic component of plasma membrane;GO:0044425//membrane part;GO:0016020//membrane;GO:0005623//cell;GO:0005886//plasma membrane;GO:0005887//integral component of plasma membrane;GO:0044464//cell part;GO:0071944//cell periphery;GO:0044459//plasma membrane part	GO:0022839//ion gated channel activity;GO:0022891//substrate-specific transmembrane transporter activity;GO:0015075//ion transmembrane transporter activity;GO:0005261//cation channel activity;GO:0016248//channel inhibitor activity;GO:0005227//calcium activated cation channel activity;GO:0022803//passive transmembrane transporter activity;GO:0098772//molecular function regulator;GO:0005216//ion ch…	GO:0042310//vasoconstriction;GO:0035150//regulation of tube size;GO:0030001//metal ion transport;GO:0009593//detection of chemical stimulus;GO:0051234//establishment of localization;GO:0042391//regulation of membrane potential;GO:0001508//action potential;GO:0003008//system process;GO:0006813//potassium ion transport;GO:0042221//response to chemical;GO:0006812//cation transport;GO:0003013//circul…
XP_005895689	0	163.96	0.001	2.17667	11.0879	0.00190102	0.156163	no	MSH6	PREDICTED: DNA mismatch repair protein Msh6 isoform X1 [Bos mutus]	Genetic Information Processing	Replication and repair	ko03430//Mismatch repair	K08737	-	-	-
XP_005901394	0	58.6667	0.001	2.17	11.0835	0.00806052	0.281878	no	RAB11FIP5	PREDICTED: rab11 family-interacting protein 5 [Bos mutus]	Cellular Processes	Transport and catabolism	ko04144//Endocytosis	K12484	-	-	-
XP_005909939	0	48.3	0.001	2.16333	11.079	0.00146874	0.137767	no	CPSF7	PREDICTED: cleavage and polyadenylation specificity factor subunit 7 isoform X2 [Bos taurus]	Genetic Information Processing	Translation	ko03015//mRNA surveillance pathway	K14398	GO:0032991//macromolecular complex;GO:0043229//intracellular organelle;GO:0005622//intracellular;GO:0070013//intracellular organelle lumen;GO:0005634//nucleus;GO:0031981//nuclear lumen;GO:0043226//organelle;GO:0044428//nuclear part;GO:0043233//organelle lumen;GO:0043231//intracellular membrane-bounded organelle;GO:0031974//membrane-enclosed lumen;GO:0043234//protein complex;GO:0044464//cell part;…	GO:0003723//RNA binding;GO:0003676//nucleic acid binding;GO:0005488//binding;GO:0097159//organic cyclic compound binding;GO:1901363//heterocyclic compound binding	GO:0016070//RNA metabolic process;GO:0006461//protein complex assembly;GO:0097659//nucleic acid-templated transcription;GO:0006807//nitrogen compound metabolic process;GO:0043170//macromolecule metabolic process;GO:0010467//gene expression;GO:0043933//macromolecular complex subunit organization;GO:0006351//transcription, DNA-templated;GO:0016043//cellular component organization;GO:0090304//nuclei…
XP_005903946	0	145.217	0.001	2.16	11.0768	0.00225693	0.16681	no	COPA	PREDICTED: coatomer subunit alpha isoform X2 [Bos mutus]	-	-	-	-	-	-	-
XP_005899500	0	71.1567	0.001	2.12667	11.0544	0.00622653	0.259686	no	DDX17	probable ATP-dependent RNA helicase DDX17 [Bos taurus]	-	-	-	-	GO:0044422//organelle part;GO:0005623//cell;GO:0044428//nuclear part;GO:0005634//nucleus;GO:0005622//intracellular;GO:0043226//organelle;GO:0044424//intracellular part;GO:0043231//intracellular membrane-bounded organelle;GO:0043233//organelle lumen;GO:0070013//intracellular organelle lumen;GO:0031974//membrane-enclosed lumen;GO:0043229//intracellular organelle;GO:0043227//membrane-bounded organel…	GO:0001882//nucleoside binding;GO:0001883//purine nucleoside binding;GO:0003824//catalytic activity;GO:0017111//nucleoside-triphosphatase activity;GO:0004386//helicase activity;GO:1901363//heterocyclic compound binding;GO:0005488//binding;GO:0036094//small molecule binding;GO:0032549//ribonucleoside binding;GO:0016462//pyrophosphatase activity;GO:0016817//hydrolase activity, acting on acid anhydr…	GO:0043170//macromolecule metabolic process;GO:0090304//nucleic acid metabolic process;GO:0044260//cellular macromolecule metabolic process;GO:1901360//organic cyclic compound metabolic process;GO:0016070//RNA metabolic process;GO:0046483//heterocycle metabolic process;GO:0044237//cellular metabolic process;GO:0006139//nucleobase-containing compound metabolic process;GO:0006725//cellular aromatic…
XP_014335442	0	32.46	0.001	2.12333	11.0521	0.000566109	0.0845425	no	SMYD2	N-lysine methyltransferase SMYD2 [Bos taurus]	-	-	-	-	GO:0044446//intracellular organelle part;GO:0031974//membrane-enclosed lumen;GO:0043227//membrane-bounded organelle;GO:0031981//nuclear lumen;GO:0070013//intracellular organelle lumen;GO:0005622//intracellular;GO:0044444//cytoplasmic part;GO:0043226//organelle;GO:0044422//organelle part;GO:0044428//nuclear part;GO:0043233//organelle lumen;GO:0005634//nucleus;GO:0044424//intracellular part;GO:0043…	GO:0043167//ion binding;GO:0043169//cation binding;GO:0001099//basal RNA polymerase II transcription machinery binding;GO:0016279//protein-lysine N-methyltransferase activity;GO:0018024//histone-lysine N-methyltransferase activity;GO:0016741//transferase activity, transferring one-carbon groups;GO:0008757//S-adenosylmethionine-dependent methyltransferase activity;GO:0016740//transferase activity;…	GO:0019538//protein metabolic process;GO:0007165//signal transduction;GO:0008283//cell proliferation;GO:0043412//macromolecule modification;GO:0051716//cellular response to stimulus;GO:0071704//organic substance metabolic process;GO:0034968//histone lysine methylation;GO:0006325//chromatin organization;GO:0036211//protein modification process;GO:0032502//developmental process;GO:0016571//histone …
XM_014479224	0	85.64	0.001	2.11333	11.0453	0.0036523	0.203314	no	POLR2B	PREDICTED: Bos mutus polymerase (RNA) II (DNA directed) polypeptide B, 140kDa (POLR2B), transcript variant X2, mRNA	Metabolism;Genetic Information Processing	Nucleotide metabolism;Transcription	ko00230//Purine metabolism;ko00240//Pyrimidine metabolism;ko03020//RNA polymerase	K03010	-	-	-
XP_005892527	0	72.7767	0.001	2.10667	11.0407	0.000582339	0.0857067	no	CYLC1	PREDICTED: cylicin-1 [Bos mutus]	-	-	-	-	GO:0016023//cytoplasmic, membrane-bounded vesicle;GO:0044424//intracellular part;GO:0031988//membrane-bounded vesicle;GO:0005623//cell;GO:0031982//vesicle;GO:0030141//secretory granule;GO:0005737//cytoplasm;GO:0097223//sperm part;GO:0043229//intracellular organelle;GO:0043228//non-membrane-bounded organelle;GO:0005622//intracellular;GO:0099503//secretory vesicle;GO:0043231//intracellular membrane…	-	GO:0044767//single-organism developmental process;GO:0044763//single-organism cellular process;GO:0048232//male gamete generation;GO:0019953//sexual reproduction;GO:0032504//multicellular organism reproduction;GO:0032501//multicellular organismal process;GO:0044699//single-organism process;GO:0032502//developmental process;GO:0048869//cellular developmental process;GO:0009987//cellular process;GO…
XP_005893379	0	87.16	0.001	2.09333	11.0316	1.48e-06	0.00140932	up	AKAP2	PREDICTED: A-kinase anchor protein 2 isoform X1 [Bos mutus]	-	-	-	-	-	-	-
XP_005904351	0	10.0133	0.001	2.09333	11.0316	0.00466734	0.228767	no	SCFD2	PREDICTED: sec1 family domain-containing protein 2-like [Bos mutus]	-	-	-	-	-	-	GO:0051234//establishment of localization;GO:0006810//transport;GO:0051179//localization
XP_005906692	0	89.18	0.001	2.09333	11.0316	0.000248684	0.056573	no	RBM26	PREDICTED: RNA-binding protein 26 isoform X1 [Bos mutus]	-	-	-	-	-	GO:0043167//ion binding;GO:0003676//nucleic acid binding;GO:1901363//heterocyclic compound binding;GO:0097159//organic cyclic compound binding;GO:0005488//binding;GO:0043169//cation binding	GO:0006396//RNA processing;GO:0046483//heterocycle metabolic process;GO:0071704//organic substance metabolic process;GO:0009987//cellular process;GO:0006807//nitrogen compound metabolic process;GO:0006725//cellular aromatic compound metabolic process;GO:0043170//macromolecule metabolic process;GO:1901360//organic cyclic compound metabolic process;GO:0034641//cellular nitrogen compound metabolic p…
XP_005895758	0	83.7733	0.001	2.09	11.0293	0.00499749	0.234063	no	HADHA	PREDICTED: trifunctional enzyme subunit alpha, mitochondrial [Bos mutus]	Metabolism	Global and Overview;Metabolism of other amino acids;Amino acid metabolism;Lipid metabolism;Carbohydrate metabolism	ko01200//Carbon metabolism;ko00280//Valine, leucine and isoleucine degradation;ko00310//Lysine degradation;ko01212//Fatty acid metabolism;ko00071//Fatty acid degradation;ko00380//Tryptophan metabolism;ko00640//Propanoate metabolism;ko00410//beta-Alanine metabolism;ko00062//Fatty acid elongation;ko00650//Butanoate metabolism;ko01040//Biosynthesis of unsaturated fatty acids	K07515	GO:0005622//intracellular;GO:0044446//intracellular organelle part;GO:0016020//membrane;GO:0043226//organelle;GO:0031967//organelle envelope;GO:0044424//intracellular part;GO:0044444//cytoplasmic part;GO:0043229//intracellular organelle;GO:0043231//intracellular membrane-bounded organelle;GO:0019866//organelle inner membrane;GO:0005623//cell;GO:0044429//mitochondrial part;GO:0044464//cell part;GO…	GO:0016836//hydro-lyase activity;GO:0016614//oxidoreductase activity, acting on CH-OH group of donors;GO:0003857//3-hydroxyacyl-CoA dehydrogenase activity;GO:0003824//catalytic activity;GO:0016616//oxidoreductase activity, acting on the CH-OH group of donors, NAD or NADP as acceptor;GO:0016835//carbon-oxygen lyase activity;GO:0016491//oxidoreductase activity;GO:0016829//lyase activity	GO:0046395//carboxylic acid catabolic process;GO:1901575//organic substance catabolic process;GO:0043436//oxoacid metabolic process;GO:0072329//monocarboxylic acid catabolic process;GO:0044237//cellular metabolic process;GO:1901652//response to peptide;GO:0032787//monocarboxylic acid metabolic process;GO:1901698//response to nitrogen compound;GO:0044710//single-organism metabolic process;GO:00447…
XP_005910506	0	7.91667	0.001	2.08333	11.0247	0.0111922	0.322273	no	DUSP23	dual specificity protein phosphatase 23 [Bos taurus]	-	-	-	-	-	-	-
XP_005889908	0	293.663	0.001	2.07667	11.0201	0.000793286	0.0983189	no	MYO18B	PREDICTED: unconventional myosin-XVIIIb [Bos mutus]	-	-	-	-	GO:0099080//supramolecular complex;GO:0044446//intracellular organelle part;GO:0044430//cytoskeletal part;GO:0099512//supramolecular fiber;GO:0044428//nuclear part;GO:0031981//nuclear lumen;GO:0044424//intracellular part;GO:0099513//polymeric cytoskeletal fiber;GO:0070013//intracellular organelle lumen;GO:0005815//microtubule organizing center;GO:0043228//non-membrane-bounded organelle;GO:0031974…	GO:0036094//small molecule binding;GO:1901363//heterocyclic compound binding;GO:0097159//organic cyclic compound binding;GO:0001882//nucleoside binding;GO:0016787//hydrolase activity;GO:0017111//nucleoside-triphosphatase activity;GO:0016818//hydrolase activity, acting on acid anhydrides, in phosphorus-containing anhydrides;GO:0001883//purine nucleoside binding;GO:0032550//purine ribonucleoside bi…	GO:0072359//circulatory system development;GO:0048513//animal organ development;GO:0044767//single-organism developmental process;GO:0014706//striated muscle tissue development;GO:0048731//system development;GO:0007275//multicellular organism development;GO:0072358//cardiovascular system development;GO:0044763//single-organism cellular process;GO:0009987//cellular process;GO:0032501//multicellula…
XP_014335580	0	40.4067	0.001	2.06667	11.0131	0.0022056	0.165864	no	PIP4K2C	PREDICTED: phosphatidylinositol 5-phosphate 4-kinase type-2 gamma isoform X2 [Bubalus bubalis]	Environmental Information Processing;Metabolism;Cellular Processes	Carbohydrate metabolism;Signal transduction;Cell motility	ko04810//Regulation of actin cytoskeleton;ko04070//Phosphatidylinositol signaling system;ko00562//Inositol phosphate metabolism	K00920	GO:0044424//intracellular part;GO:0043227//membrane-bounded organelle;GO:1903561//extracellular vesicle;GO:0044464//cell part;GO:0044421//extracellular region part;GO:0005576//extracellular region;GO:0005623//cell;GO:0043226//organelle;GO:0043230//extracellular organelle;GO:0031982//vesicle;GO:0005622//intracellular	GO:0016307//phosphatidylinositol phosphate kinase activity;GO:0001883//purine nucleoside binding;GO:0016772//transferase activity, transferring phosphorus-containing groups;GO:0032549//ribonucleoside binding;GO:0032550//purine ribonucleoside binding;GO:0005515//protein binding;GO:1901363//heterocyclic compound binding;GO:0016740//transferase activity;GO:0005488//binding;GO:0097367//carbohydrate d…	GO:0044238//primary metabolic process;GO:0006650//glycerophospholipid metabolic process;GO:0019637//organophosphate metabolic process;GO:0050789//regulation of biological process;GO:0048518//positive regulation of biological process;GO:0065007//biological regulation;GO:0044237//cellular metabolic process;GO:0071704//organic substance metabolic process;GO:0009987//cellular process;GO:0016241//regu…
XP_014335581	0	40.4067	0.001	2.06667	11.0131	0.00220611	0.165864	no	PIP4K2C	PREDICTED: phosphatidylinositol 5-phosphate 4-kinase type-2 gamma isoform X2 [Bubalus bubalis]	Cellular Processes;Metabolism;Environmental Information Processing	Carbohydrate metabolism;Cell motility;Signal transduction	ko04810//Regulation of actin cytoskeleton;ko04070//Phosphatidylinositol signaling system;ko00562//Inositol phosphate metabolism	K00920	GO:0031982//vesicle;GO:0005623//cell;GO:0043230//extracellular organelle;GO:0005576//extracellular region;GO:0044424//intracellular part;GO:1903561//extracellular vesicle;GO:0005622//intracellular;GO:0043227//membrane-bounded organelle;GO:0044421//extracellular region part;GO:0044464//cell part;GO:0043226//organelle	GO:1901363//heterocyclic compound binding;GO:0001882//nucleoside binding;GO:0016740//transferase activity;GO:0005488//binding;GO:0032549//ribonucleoside binding;GO:0005515//protein binding;GO:0097367//carbohydrate derivative binding;GO:0097159//organic cyclic compound binding;GO:0016772//transferase activity, transferring phosphorus-containing groups;GO:0016307//phosphatidylinositol phosphate kin…	GO:0048518//positive regulation of biological process;GO:0010508//positive regulation of autophagy;GO:0010506//regulation of autophagy;GO:0006793//phosphorus metabolic process;GO:0006644//phospholipid metabolic process;GO:0046486//glycerolipid metabolic process;GO:0019637//organophosphate metabolic process;GO:0048522//positive regulation of cellular process;GO:0008152//metabolic process;GO:000679…
XP_005888599	0	118.707	0.001	2.05	11.0014	0.000359219	0.0667477	no	RPS6KC1	PREDICTED: ribosomal protein S6 kinase delta-1-like isoform X1 [Bos mutus]	-	-	-	-	-	-	-
XP_005906498	0	21.59	0.001	2.04667	10.9991	0.000771295	0.0974317	no	STX3	PREDICTED: syntaxin-3 [Bos mutus]	Organismal Systems;Genetic Information Processing	Folding, sorting and degradation;Nervous system	ko04721//Synaptic vesicle cycle;ko04130//SNARE interactions in vesicular transport	K08486	-	-	-
XP_014336020	0	80.1967	0.001	2.04667	10.9991	0.000627548	0.0890338	no	STAT1	PREDICTED: signal transducer and activator of transcription 1-alpha/beta isoform X1 [Bison bison bison]	Organismal Systems;Environmental Information Processing	Immune system;Endocrine system;Signal transduction;Development	ko04062//Chemokine signaling pathway;ko04630//Jak-STAT signaling pathway;ko04380//Osteoclast differentiation;ko04919//Thyroid hormone signaling pathway;ko04917//Prolactin signaling pathway;ko04620//Toll-like receptor signaling pathway	K11220	GO:0044446//intracellular organelle part;GO:0044464//cell part;GO:0070013//intracellular organelle lumen;GO:0005623//cell;GO:0005737//cytoplasm;GO:0000785//chromatin;GO:0031981//nuclear lumen;GO:0005622//intracellular;GO:0043231//intracellular membrane-bounded organelle;GO:0005634//nucleus;GO:0044444//cytoplasmic part;GO:0043228//non-membrane-bounded organelle;GO:0031974//membrane-enclosed lumen;…	GO:0000977//RNA polymerase II regulatory region sequence-specific DNA binding;GO:0001067//regulatory region nucleic acid binding;GO:0005515//protein binding;GO:0003676//nucleic acid binding;GO:0001071//nucleic acid binding transcription factor activity;GO:0000981//RNA polymerase II transcription factor activity, sequence-specific DNA binding;GO:0001012//RNA polymerase II regulatory region DNA bin…	GO:0001655//urogenital system development;GO:0050789//regulation of biological process;GO:0043434//response to peptide hormone;GO:0072359//circulatory system development;GO:0072075//metanephric mesenchyme development;GO:0051336//regulation of hydrolase activity;GO:0032501//multicellular organismal process;GO:0048878//chemical homeostasis;GO:0001568//blood vessel development;GO:0034654//nucleobase…
XP_005902026	0	40.8233	0.001	2.04333	10.9967	0.0133261	0.347977	no	POLDIP3	polymerase delta-interacting protein 3 [Bos taurus]	-	-	-	-	GO:0005623//cell;GO:0044464//cell part	GO:0097159//organic cyclic compound binding;GO:0005488//binding	GO:0015931//nucleobase-containing compound transport;GO:0071702//organic substance transport;GO:0051028//mRNA transport;GO:0071704//organic substance metabolic process;GO:0071427//mRNA-containing ribonucleoprotein complex export from nucleus;GO:0051649//establishment of localization in cell;GO:0051236//establishment of RNA localization;GO:0006406//mRNA export from nucleus;GO:0046907//intracellula…
XP_005901729	0	70.1467	0.001	2.03667	10.992	0.00632505	0.261512	no	OS9	PREDICTED: protein OS-9 isoform X1 [Bos mutus]	Genetic Information Processing	Folding, sorting and degradation	ko04141//Protein processing in endoplasmic reticulum	K10088	-	-	-
XP_005905930	0	77.5267	0.001	2.03667	10.992	0.00550067	0.24527	no	DGKA	PREDICTED: LOW QUALITY PROTEIN: diacylglycerol kinase alpha [Bos mutus]	Metabolism;Environmental Information Processing	Signal transduction;Lipid metabolism	ko04070//Phosphatidylinositol signaling system;ko00564//Glycerophospholipid metabolism;ko00561//Glycerolipid metabolism	K00901	GO:0044444//cytoplasmic part;GO:0005737//cytoplasm;GO:0005622//intracellular;GO:0044424//intracellular part;GO:0016020//membrane;GO:0044464//cell part;GO:0005623//cell	GO:0016740//transferase activity;GO:0016772//transferase activity, transferring phosphorus-containing groups;GO:1901363//heterocyclic compound binding;GO:0032549//ribonucleoside binding;GO:0043167//ion binding;GO:0001882//nucleoside binding;GO:0036094//small molecule binding;GO:0016301//kinase activity;GO:0003824//catalytic activity;GO:0005488//binding;GO:0097367//carbohydrate derivative binding;…	GO:0009987//cellular process;GO:0006796//phosphate-containing compound metabolic process;GO:0044700//single organism signaling;GO:0050789//regulation of biological process;GO:0050896//response to stimulus;GO:0050794//regulation of cellular process;GO:0007154//cell communication;GO:0007165//signal transduction;GO:0008152//metabolic process;GO:0044699//single-organism process;GO:0006793//phosphorus…
XP_005901032	0	290.48	0.001	2.03	10.9873	0.000810317	0.0991839	no	FAM208B	PREDICTED: protein FAM208B [Bos mutus]	-	-	-	-	GO:0044428//nuclear part;GO:0031974//membrane-enclosed lumen;GO:0043229//intracellular organelle;GO:0005634//nucleus;GO:0005622//intracellular;GO:0044446//intracellular organelle part;GO:0043227//membrane-bounded organelle;GO:0031981//nuclear lumen;GO:0044422//organelle part;GO:0043226//organelle;GO:0005623//cell;GO:0043231//intracellular membrane-bounded organelle;GO:0043233//organelle lumen;GO:…	-	-
XP_005898783	0	27.71	0.001	2.02667	10.9849	0.0211135	0.406118	no	SLC25A44	solute carrier family 25 member 44 [Bos taurus]	-	-	-	-	-	-	-
XP_005896124	0	168.46	0.001	2.01667	10.9778	0.00182529	0.15347	no	ADGRL3	PREDICTED: latrophilin-3-like isoform X4 [Bos mutus]	-	-	-	-	GO:0005623//cell;GO:0042995//cell projection;GO:0043005//neuron projection;GO:0030054//cell junction;GO:0016020//membrane;GO:0031224//intrinsic component of membrane;GO:0071944//cell periphery;GO:0005886//plasma membrane;GO:0044425//membrane part;GO:0044464//cell part;GO:0097458//neuron part	GO:0043169//cation binding;GO:0043167//ion binding;GO:0004871//signal transducer activity;GO:0004888//transmembrane signaling receptor activity;GO:0005488//binding;GO:0004872//receptor activity;GO:0038023//signaling receptor activity;GO:0046872//metal ion binding;GO:0099600//transmembrane receptor activity;GO:0060089//molecular transducer activity	GO:0048856//anatomical structure development;GO:0007610//behavior;GO:0050896//response to stimulus;GO:0007154//cell communication;GO:0009987//cellular process;GO:0040011//locomotion;GO:0044707//single-multicellular organism process;GO:0007165//signal transduction;GO:0044767//single-organism developmental process;GO:0023052//signaling;GO:0016477//cell migration;GO:0007416//synapse assembly;GO:0044…
XP_014333854	0	19.9933	0.001	2.01667	10.9778	0.0303781	0.462532	no	OTUB2	PREDICTED: ubiquitin thioesterase OTUB2 isoform X1 [Bos taurus]	-	-	-	-	-	-	-
XP_005886740	0	166.343	0.001	2.01333	10.9754	5.62e-09	1.48e-05	up	ARAP2	PREDICTED: arf-GAP with Rho-GAP domain, ANK repeat and PH domain-containing protein 2 [Bos mutus]	Cellular Processes	Transport and catabolism	ko04144//Endocytosis	K18440	-	GO:1901981//phosphatidylinositol phosphate binding;GO:0005488//binding;GO:0005543//phospholipid binding;GO:0035091//phosphatidylinositol binding;GO:0008289//lipid binding	GO:0065007//biological regulation;GO:0050790//regulation of catalytic activity;GO:0044699//single-organism process;GO:0043087//regulation of GTPase activity;GO:0044763//single-organism cellular process;GO:0065009//regulation of molecular function;GO:0009987//cellular process;GO:0007154//cell communication;GO:0051336//regulation of hydrolase activity
XP_005891546	0	8.75	0.001	2.01333	10.9754	0.00581039	0.252209	no	POP5	ribonuclease P/MRP protein subunit POP5 [Bos taurus]	Genetic Information Processing	Translation	ko03013//RNA transport;ko03008//Ribosome biogenesis in eukaryotes	K03537	-	-	-
XP_014332821	0.0166667	25.8233	0.00333333	6.68333	10.9694	0.000293407	0.0619219	no	AP1S1	AP-1 complex subunit sigma-1A [Bos taurus]	Cellular Processes	Transport and catabolism	ko04142//Lysosome	K12394	GO:0030120//vesicle coat;GO:0031982//vesicle;GO:0044431//Golgi apparatus part;GO:1903561//extracellular vesicle;GO:0044425//membrane part;GO:0044444//cytoplasmic part;GO:0030424//axon;GO:0043231//intracellular membrane-bounded organelle;GO:0005576//extracellular region;GO:0005798//Golgi-associated vesicle;GO:0044464//cell part;GO:0030658//transport vesicle membrane;GO:0031410//cytoplasmic vesicle…	GO:0005215//transporter activity;GO:0022892//substrate-specific transporter activity	GO:0002697//regulation of immune effector process;GO:0031347//regulation of defense response;GO:0043900//regulation of multi-organism process;GO:0019884//antigen processing and presentation of exogenous antigen;GO:0043903//regulation of symbiosis, encompassing mutualism through parasitism;GO:0050794//regulation of cellular process;GO:0048002//antigen processing and presentation of peptide antigen…
XP_014336373	0	167.467	0.001	2.00333	10.9682	0.00183924	0.153646	no	MAPKBP1	PREDICTED: mitogen-activated protein kinase-binding protein 1 isoform X1 [Bison bison bison]	-	-	-	-	-	-	-
XP_005911553	0	42.64	0.001	2	10.9658	0.0124273	0.335635	no	CRBN	PREDICTED: protein cereblon isoform X1 [Bos mutus]	-	-	-	-	GO:0031981//nuclear lumen;GO:0031461//cullin-RING ubiquitin ligase complex;GO:0044428//nuclear part;GO:0043233//organelle lumen;GO:0080008//Cul4-RING E3 ubiquitin ligase complex;GO:0043231//intracellular membrane-bounded organelle;GO:0070013//intracellular organelle lumen;GO:0005622//intracellular;GO:1990234//transferase complex;GO:0031974//membrane-enclosed lumen;GO:0043227//membrane-bounded org…	GO:0043169//cation binding;GO:0043167//ion binding;GO:0005488//binding	GO:1901575//organic substance catabolic process;GO:0070647//protein modification by small protein conjugation or removal;GO:0051603//proteolysis involved in cellular protein catabolic process;GO:0044237//cellular metabolic process;GO:0044238//primary metabolic process;GO:0043170//macromolecule metabolic process;GO:0036211//protein modification process;GO:0043632//modification-dependent macromolec…
XP_005904172	0	598.583	0.001	1.99667	10.9634	0.000287486	0.0611635	no	LOC102277515	PREDICTED: LOW QUALITY PROTEIN: dystonin-like [Bos mutus]	-	-	-	-	-	-	-
XP_014337524	0	91.55	0.001	1.99333	10.961	0.000361614	0.0669113	no	CEP120	PREDICTED: centrosomal protein of 120 kDa isoform X2 [Bison bison bison]	-	-	-	-	GO:0044422//organelle part;GO:0043226//organelle;GO:0044464//cell part;GO:0005623//cell;GO:0043228//non-membrane-bounded organelle;GO:0044430//cytoskeletal part;GO:0015630//microtubule cytoskeleton;GO:0043229//intracellular organelle;GO:0044424//intracellular part;GO:0043232//intracellular non-membrane-bounded organelle;GO:0005622//intracellular;GO:0005856//cytoskeleton;GO:0044446//intracellular …	GO:0005515//protein binding;GO:0005488//binding	GO:0032502//developmental process;GO:0033036//macromolecule localization;GO:0000226//microtubule cytoskeleton organization;GO:0008104//protein localization;GO:0008283//cell proliferation;GO:0032501//multicellular organismal process;GO:0021543//pallium development;GO:0044763//single-organism cellular process;GO:0007017//microtubule-based process;GO:0007399//nervous system development;GO:0044699//s…
XP_014333695	0	7.42	0.001	1.98333	10.9537	0.00983196	0.305	no	MPV17	PREDICTED: protein Mpv17 isoform X3 [Bubalus bubalis]	Cellular Processes	Transport and catabolism	ko04146//Peroxisome	K13348	GO:0043226//organelle;GO:0043229//intracellular organelle;GO:0043227//membrane-bounded organelle;GO:0031975//envelope;GO:0031224//intrinsic component of membrane;GO:0016020//membrane;GO:0044424//intracellular part;GO:0042579//microbody;GO:0044464//cell part;GO:0031967//organelle envelope;GO:0019866//organelle inner membrane;GO:0005623//cell;GO:0005737//cytoplasm;GO:0005622//intracellular;GO:00444…	-	GO:0016043//cellular component organization;GO:1901700//response to oxygen-containing compound;GO:0044237//cellular metabolic process;GO:0044767//single-organism developmental process;GO:0065008//regulation of biological quality;GO:0007275//multicellular organism development;GO:0043583//ear development;GO:0048731//system development;GO:0044707//single-multicellular organism process;GO:0009987//ce…
XP_005891126	0	15.2167	0.001	1.97333	10.9464	0.0417763	0.517788	no	RPL14	PREDICTED: 60S ribosomal protein L14 [Bos mutus]	Genetic Information Processing	Translation	ko03010//Ribosome	K02875	-	-	-
XP_005907741	0	119.263	0.001	1.97333	10.9464	0.0030733	0.187793	no	HDAC5	PREDICTED: histone deacetylase 5 isoform X2 [Bos mutus]	-	-	-	-	GO:0044446//intracellular organelle part;GO:0044428//nuclear part;GO:0070013//intracellular organelle lumen;GO:0044424//intracellular part;GO:0044422//organelle part;GO:0043231//intracellular membrane-bounded organelle;GO:0005634//nucleus;GO:0031974//membrane-enclosed lumen;GO:0043233//organelle lumen;GO:0005623//cell;GO:0043226//organelle;GO:0044464//cell part;GO:0031981//nuclear lumen;GO:004322…	GO:0019900//kinase binding;GO:0016810//hydrolase activity, acting on carbon-nitrogen (but not peptide) bonds;GO:0016787//hydrolase activity;GO:0019213//deacetylase activity;GO:0005515//protein binding;GO:0044212//transcription regulatory region DNA binding;GO:0043169//cation binding;GO:0019901//protein kinase binding;GO:0017136//NAD-dependent histone deacetylase activity;GO:0033558//protein deace…	GO:0043534//blood vessel endothelial cell migration;GO:0048514//blood vessel morphogenesis;GO:0009058//biosynthetic process;GO:0031326//regulation of cellular biosynthetic process;GO:0050794//regulation of cellular process;GO:0051147//regulation of muscle cell differentiation;GO:0001568//blood vessel development;GO:0051098//regulation of binding;GO:0044238//primary metabolic process;GO:0051179//l…
XP_005891055	0	7.77333	0.001	1.96333	10.9391	0.0401956	0.510953	no	LOC102269243	PREDICTED: profilin-2-like [Bos mutus]	Environmental Information Processing;Cellular Processes	Cell motility;Signal transduction	ko04810//Regulation of actin cytoskeleton;ko04015//Rap1 signaling pathway	K05759	-	-	GO:0006996//organelle organization;GO:0016043//cellular component organization;GO:0009987//cellular process;GO:0007010//cytoskeleton organization;GO:0071840//cellular component organization or biogenesis
XP_005891776	0	174.767	0.001	1.96	10.9366	0.00172496	0.150576	no	KDM3B	PREDICTED: lysine-specific demethylase 3B [Bison bison bison]	-	-	-	-	-	-	-
XP_005909375	0	33.6633	0.001	1.96	10.9366	0.0129494	0.342674	no	CFAP97	PREDICTED: UPF0501 protein KIAA1430 homolog isoform X2 [Bos mutus]	-	-	-	-	-	-	-
XP_005910432	0	11.17	0.001	1.96	10.9366	0.0141905	0.357025	no	LOC102271781	PREDICTED: SUN domain-containing protein 1-like [Bos mutus]	-	-	-	-	-	-	-
XP_005900350	0	72.2033	0.001	1.94333	10.9243	9.1e-06	0.00549376	up	FAM160B1	PREDICTED: protein FAM160B1 [Bos mutus]	-	-	-	-	-	-	-
XP_005899215	0	217.507	0.001	1.94	10.9218	0.00123847	0.127122	no	SHROOM3	PREDICTED: protein Shroom3 [Bos mutus]	Cellular Processes	Cellular commiunity	ko04530//Tight junction	K18625	-	GO:0008092//cytoskeletal protein binding;GO:0005488//binding;GO:0003779//actin binding;GO:0005515//protein binding	GO:0048731//system development;GO:0007399//nervous system development;GO:0032501//multicellular organismal process;GO:0044767//single-organism developmental process;GO:0030855//epithelial cell differentiation;GO:0009792//embryo development ending in birth or egg hatching;GO:0048646//anatomical structure formation involved in morphogenesis;GO:0035295//tube development;GO:0001841//neural tube forma…
XP_005894904	0	24.66	0.001	1.93667	10.9194	0.000857144	0.102138	no	FAM107B	PREDICTED: serine/threonine-protein kinase GIN4-like [Bos mutus]	-	-	-	-	-	-	-
XP_005889556	0	18.6233	0.001	1.93333	10.9169	0.000847303	0.101657	no	COLEC11	collectin-11 precursor [Bos taurus]	Cellular Processes	Transport and catabolism	ko04145//Phagosome	K10066	GO:0032991//macromolecular complex;GO:0043234//protein complex	GO:0005488//binding	GO:0044707//single-multicellular organism process;GO:0032501//multicellular organismal process;GO:0044699//single-organism process
XP_005895154	0	37	0.001	1.93333	10.9169	9.82e-05	0.0316433	up	LOC102268809	chromosome 10 open reading frame 88 [Macaca mulatta]	-	-	-	-	-	-	-
XP_005895772	0	68.9233	0.001	1.93333	10.9169	0.00643159	0.263478	no	TMEM214	PREDICTED: transmembrane protein 214 isoform X1 [Bos mutus]	-	-	-	-	GO:0043229//intracellular organelle;GO:0005622//intracellular;GO:0044424//intracellular part;GO:0043227//membrane-bounded organelle;GO:0043226//organelle;GO:0005737//cytoplasm;GO:0043231//intracellular membrane-bounded organelle;GO:0044464//cell part;GO:0016020//membrane;GO:0044425//membrane part;GO:0005623//cell;GO:0031224//intrinsic component of membrane	-	GO:0044763//single-organism cellular process;GO:0044699//single-organism process;GO:0008219//cell death;GO:0009987//cellular process;GO:0012501//programmed cell death
XM_005900695	0	9.45333	0.001	1.93	10.9144	0.0131937	0.346144	no	LOC102276855	PREDICTED: Bos mutus serum amyloid A protein (LOC102276855), mRNA	-	-	-	-	GO:0032994//protein-lipid complex;GO:0034358//plasma lipoprotein particle;GO:0005576//extracellular region;GO:0005615//extracellular space;GO:0032991//macromolecular complex;GO:1990777//lipoprotein particle;GO:0044421//extracellular region part	-	GO:0006954//inflammatory response;GO:0006950//response to stress;GO:0050896//response to stimulus;GO:0006952//defense response;GO:0002526//acute inflammatory response
XP_014336939	0	5.3	0.001	1.93	10.9144	0.0268937	0.441811	no	NXT2	NTF2-related export protein 2 [Bos taurus]	Genetic Information Processing	Translation	ko03013//RNA transport;ko03015//mRNA surveillance pathway;ko03008//Ribosome biogenesis in eukaryotes	K14285	GO:0005622//intracellular;GO:0031981//nuclear lumen;GO:0044444//cytoplasmic part;GO:0043229//intracellular organelle;GO:0043233//organelle lumen;GO:0070013//intracellular organelle lumen;GO:0044422//organelle part;GO:0044446//intracellular organelle part;GO:0005623//cell;GO:0005737//cytoplasm;GO:0031974//membrane-enclosed lumen;GO:0044424//intracellular part;GO:0043227//membrane-bounded organelle…	-	GO:0006403//RNA localization;GO:0015931//nucleobase-containing compound transport;GO:0050657//nucleic acid transport;GO:0071705//nitrogen compound transport;GO:0051179//localization;GO:0006810//transport;GO:0050658//RNA transport;GO:0008104//protein localization;GO:0051236//establishment of RNA localization;GO:0051234//establishment of localization;GO:0071702//organic substance transport;GO:00330…
XP_005899153	0	46.9433	0.001	1.92667	10.9119	4.61e-05	0.0183707	up	SYNCRIP	heterogeneous nuclear ribonucleoprotein Q isoform 3 [Homo sapiens]	-	-	-	-	GO:0030529//intracellular ribonucleoprotein complex;GO:0032991//macromolecular complex;GO:0005681//spliceosomal complex;GO:0097458//neuron part;GO:0044423//virion part;GO:0019012//virion;GO:0043231//intracellular membrane-bounded organelle;GO:0031974//membrane-enclosed lumen;GO:0005622//intracellular;GO:0044464//cell part;GO:0044446//intracellular organelle part;GO:0042995//cell projection;GO:004…	GO:1901363//heterocyclic compound binding;GO:0005488//binding;GO:0003729//mRNA binding;GO:0097159//organic cyclic compound binding;GO:0044822//poly(A) RNA binding;GO:0070717//poly-purine tract binding;GO:0003727//single-stranded RNA binding;GO:0003676//nucleic acid binding;GO:0003723//RNA binding	GO:0006396//RNA processing;GO:0044238//primary metabolic process;GO:0071704//organic substance metabolic process;GO:0000375//RNA splicing, via transesterification reactions;GO:0043170//macromolecule metabolic process;GO:0006952//defense response;GO:0044260//cellular macromolecule metabolic process;GO:0009059//macromolecule biosynthetic process;GO:0006518//peptide metabolic process;GO:0043603//cel…
XP_005895385	0	19.3067	0.001	1.91667	10.9044	0.0078645	0.278468	no	BIN3	bridging integrator 3 [Bos taurus]	-	-	-	-	GO:0043226//organelle;GO:0005856//cytoskeleton;GO:0043228//non-membrane-bounded organelle;GO:0044464//cell part;GO:0005623//cell;GO:0005622//intracellular;GO:0044424//intracellular part;GO:0015629//actin cytoskeleton;GO:0043229//intracellular organelle;GO:0043232//intracellular non-membrane-bounded organelle	-	GO:0000902//cell morphogenesis;GO:0040007//growth;GO:0044707//single-multicellular organism process;GO:0009888//tissue development;GO:0022607//cellular component assembly;GO:0048589//developmental growth;GO:0033036//macromolecule localization;GO:0044699//single-organism process;GO:0016043//cellular component organization;GO:0043403//skeletal muscle tissue regeneration;GO:0048856//anatomical struc…
XP_005895498	0	141.207	0.001	1.91667	10.9044	0.00235172	0.168226	no	ACIN1	PREDICTED: LOW QUALITY PROTEIN: apoptotic chromatin condensation inducer in the nucleus [Bos mutus]	Genetic Information Processing	Translation;Transcription	ko03013//RNA transport;ko03040//Spliceosome;ko03015//mRNA surveillance pathway	K12875	-	-	-
XP_005911526	0	41.7833	0.001	1.91667	10.9044	0.00164788	0.146414	no	FLVCR2	PREDICTED: feline leukemia virus subgroup C receptor-related protein 2-like [Bos mutus]	-	-	-	-	GO:0044425//membrane part;GO:0031224//intrinsic component of membrane;GO:0016020//membrane	GO:1901363//heterocyclic compound binding;GO:0097159//organic cyclic compound binding;GO:0046906//tetrapyrrole binding;GO:0005488//binding	GO:1902578//single-organism localization;GO:0051234//establishment of localization;GO:0044763//single-organism cellular process;GO:0006810//transport;GO:0044699//single-organism process;GO:0051181//cofactor transport;GO:0044765//single-organism transport;GO:0009987//cellular process;GO:0051179//localization
XP_014335733	0	62.5867	0.001	1.89667	10.8893	0.000755913	0.0966574	no	SP1	PREDICTED: transcription factor Sp1 isoform X3 [Bison bison bison]	Environmental Information Processing;Organismal Systems	Signal transduction;Endocrine system	ko04915//Estrogen signaling pathway;ko04350//TGF-beta signaling pathway	K04684	GO:0044464//cell part;GO:0043226//organelle;GO:0005622//intracellular;GO:0031981//nuclear lumen;GO:0005623//cell;GO:0044424//intracellular part;GO:0044428//nuclear part;GO:0031974//membrane-enclosed lumen;GO:0043229//intracellular organelle;GO:0005634//nucleus;GO:0043227//membrane-bounded organelle;GO:0044446//intracellular organelle part;GO:0044422//organelle part;GO:0043233//organelle lumen;GO:…	GO:0046983//protein dimerization activity;GO:0019899//enzyme binding;GO:0000976//transcription regulatory region sequence-specific DNA binding;GO:1990837//sequence-specific double-stranded DNA binding;GO:0043167//ion binding;GO:0003690//double-stranded DNA binding;GO:0043565//sequence-specific DNA binding;GO:0044212//transcription regulatory region DNA binding;GO:0003700//transcription factor act…	GO:0031323//regulation of cellular metabolic process;GO:0071704//organic substance metabolic process;GO:0031325//positive regulation of cellular metabolic process;GO:0051851//modification by host of symbiont morphology or physiology;GO:0008152//metabolic process;GO:0052312//modulation of transcription in other organism involved in symbiotic interaction;GO:0006807//nitrogen compound metabolic proc…
XP_005898402	0	6.62667	0.001	1.88667	10.8816	0.0108828	0.318604	no	TIMP3	PREDICTED: metalloproteinase inhibitor 3-like isoform X2 [Bos mutus]	-	-	-	-	-	-	-
XP_005908594	0	204.29	0.001	1.88333	10.8791	1.21e-09	4.26e-06	up	PRR14L	PREDICTED: protein PRR14L [Bos mutus]	-	-	-	-	-	-	-
XP_005888163	0	117.933	0.001	1.87	10.8688	0.00311907	0.1901	no	SLF2	PREDICTED: protein FAM178A isoform X1 [Bos taurus]	-	-	-	-	GO:0044464//cell part;GO:0043227//membrane-bounded organelle;GO:0005694//chromosome;GO:0044427//chromosomal part;GO:0043232//intracellular non-membrane-bounded organelle;GO:0043228//non-membrane-bounded organelle;GO:0043229//intracellular organelle;GO:0043226//organelle;GO:0005576//extracellular region;GO:0005623//cell;GO:0044422//organelle part;GO:0005622//intracellular;GO:0044424//intracellular…	GO:0019899//enzyme binding;GO:0005488//binding;GO:0005515//protein binding;GO:0044389//ubiquitin-like protein ligase binding	GO:0019222//regulation of metabolic process;GO:0007067//mitotic nuclear division;GO:0034088//maintenance of mitotic sister chromatid cohesion;GO:0065003//macromolecular complex assembly;GO:0008104//protein localization;GO:0051179//localization;GO:0000070//mitotic sister chromatid segregation;GO:0031325//positive regulation of cellular metabolic process;GO:0007049//cell cycle;GO:0048522//positive …
XP_005896670	0	13.9333	0.001	1.86667	10.8662	0.00589041	0.253552	no	CBFB	PREDICTED: core-binding factor subunit beta [Bos mutus]	-	-	-	-	GO:0044424//intracellular part;GO:0005623//cell;GO:0043231//intracellular membrane-bounded organelle;GO:0044464//cell part;GO:0043226//organelle;GO:0043227//membrane-bounded organelle;GO:0005622//intracellular;GO:0043229//intracellular organelle	GO:0003676//nucleic acid binding;GO:0097159//organic cyclic compound binding;GO:1901363//heterocyclic compound binding;GO:0000989//transcription factor activity, transcription factor binding;GO:0000988//transcription factor activity, protein binding;GO:0001071//nucleic acid binding transcription factor activity;GO:0005488//binding;GO:0003712//transcription cofactor activity	GO:0048869//cellular developmental process;GO:0044260//cellular macromolecule metabolic process;GO:0034645//cellular macromolecule biosynthetic process;GO:0006725//cellular aromatic compound metabolic process;GO:0036211//protein modification process;GO:0044763//single-organism cellular process;GO:0006351//transcription, DNA-templated;GO:0009058//biosynthetic process;GO:0019438//aromatic compound …
XP_014336727	0	55.2233	0.001	1.86333	10.8637	0.00872485	0.291476	no	LOC102278265	PREDICTED: serine/threonine-protein phosphatase 2A 65 kDa regulatory subunit A alpha isoform-like isoform X1 [Pantholops hodgsonii]	Environmental Information Processing;Genetic Information Processing;Cellular Processes;Organismal Systems	Cell growth and death;Circulatory system;Signal transduction;Nervous system;Cellular commiunity;Translation	ko04151//PI3K-Akt signaling pathway;ko04261//Adrenergic signaling in cardiomyocytes;ko04390//Hippo signaling pathway;ko04728//Dopaminergic synapse;ko04530//Tight junction;ko04152//AMPK signaling pathway;ko04114//Oocyte meiosis;ko04071//Sphingolipid signaling pathway;ko03015//mRNA surveillance pathway;ko04350//TGF-beta signaling pathway;ko04730//Long-term depression	K03456	GO:0043227//membrane-bounded organelle;GO:0044421//extracellular region part;GO:0044444//cytoplasmic part;GO:0044422//organelle part;GO:0043232//intracellular non-membrane-bounded organelle;GO:1903293//phosphatase complex;GO:0005856//cytoskeleton;GO:0043234//protein complex;GO:0005622//intracellular;GO:0043229//intracellular organelle;GO:1903561//extracellular vesicle;GO:0008287//protein serine/t…	GO:0016788//hydrolase activity, acting on ester bonds;GO:0005488//binding;GO:0098772//molecular function regulator;GO:0004721//phosphoprotein phosphatase activity;GO:0019888//protein phosphatase regulator activity;GO:0003824//catalytic activity;GO:0042578//phosphoric ester hydrolase activity;GO:0016791//phosphatase activity;GO:0046983//protein dimerization activity;GO:0019208//phosphatase regulat…	GO:0010648//negative regulation of cell communication;GO:0031324//negative regulation of cellular metabolic process;GO:0043409//negative regulation of MAPK cascade;GO:0023057//negative regulation of signaling;GO:0044267//cellular protein metabolic process;GO:0045132//meiotic chromosome segregation;GO:0019220//regulation of phosphate metabolic process;GO:0019538//protein metabolic process;GO:00442…
XP_005887284	0	37.2233	0.001	1.84667	10.8507	7.91e-05	0.0270179	up	UPF3B	PREDICTED: regulator of nonsense transcripts 3B isoform X4 [Bos taurus]	Genetic Information Processing	Translation	ko03013//RNA transport;ko03015//mRNA surveillance pathway	K14328	GO:0031981//nuclear lumen;GO:0005634//nucleus;GO:0005623//cell;GO:0043226//organelle;GO:0044428//nuclear part;GO:0043232//intracellular non-membrane-bounded organelle;GO:0043227//membrane-bounded organelle;GO:0044444//cytoplasmic part;GO:0044424//intracellular part;GO:0043228//non-membrane-bounded organelle;GO:0005737//cytoplasm;GO:0031974//membrane-enclosed lumen;GO:0044464//cell part;GO:0043233…	GO:0044822//poly(A) RNA binding;GO:0005488//binding;GO:0003676//nucleic acid binding;GO:0005215//transporter activity;GO:0003723//RNA binding;GO:1901363//heterocyclic compound binding;GO:0097159//organic cyclic compound binding	GO:0006807//nitrogen compound metabolic process;GO:0051641//cellular localization;GO:0019538//protein metabolic process;GO:0019438//aromatic compound biosynthetic process;GO:0009056//catabolic process;GO:0019439//aromatic compound catabolic process;GO:0006810//transport;GO:0006351//transcription, DNA-templated;GO:0006405//RNA export from nucleus;GO:0050657//nucleic acid transport;GO:0044267//cell…
XP_005905474	0	94.7133	0.001	1.84667	10.8507	1.14e-06	0.00117253	up	SMARCAD1	PREDICTED: SWI/SNF-related matrix-associated actin-dependent regulator of chromatin subfamily A containing DEAD/H box 1 isoform X1 [Bos mutus]	Cellular Processes	Cellular commiunity	ko04550//Signaling pathways regulating pluripotency of stem cells	K14439	GO:0044427//chromosomal part;GO:0031974//membrane-enclosed lumen;GO:0031981//nuclear lumen;GO:0070013//intracellular organelle lumen;GO:0043228//non-membrane-bounded organelle;GO:0044424//intracellular part;GO:0044422//organelle part;GO:0043226//organelle;GO:0043229//intracellular organelle;GO:0032991//macromolecular complex;GO:0044428//nuclear part;GO:0044446//intracellular organelle part;GO:000…	GO:0016818//hydrolase activity, acting on acid anhydrides, in phosphorus-containing anhydrides;GO:0003824//catalytic activity;GO:0005488//binding;GO:0001882//nucleoside binding;GO:0016462//pyrophosphatase activity;GO:0032549//ribonucleoside binding;GO:0097159//organic cyclic compound binding;GO:0001883//purine nucleoside binding;GO:0016817//hydrolase activity, acting on acid anhydrides;GO:1901363…	GO:0051716//cellular response to stimulus;GO:0006807//nitrogen compound metabolic process;GO:0044238//primary metabolic process;GO:0006464//cellular protein modification process;GO:0016569//chromatin modification;GO:0008152//metabolic process;GO:0044267//cellular protein metabolic process;GO:0016575//histone deacetylation;GO:0035601//protein deacylation;GO:0006139//nucleobase-containing compound …
XP_005909517	0	114.82	0.001	1.84333	10.8481	0.00322399	0.192661	no	DDB1	DNA damage-binding protein 1 [Bos taurus]	Genetic Information Processing	Replication and repair;Folding, sorting and degradation	ko04120//Ubiquitin mediated proteolysis;ko03420//Nucleotide excision repair	K10610	-	-	-
XP_005889881	0	54.1033	0.001	1.83667	10.8429	0.00188339	0.155809	no	RDX	radixin [Bos taurus]	Cellular Processes	Cell motility	ko04810//Regulation of actin cytoskeleton	K05762	GO:0032153//cell division site;GO:0005912//adherens junction;GO:0098862//cluster of actin-based cell projections;GO:0043227//membrane-bounded organelle;GO:0005576//extracellular region;GO:0032155//cell division site part;GO:0032421//stereocilium bundle;GO:0044424//intracellular part;GO:0005886//plasma membrane;GO:0016020//membrane;GO:0042995//cell projection;GO:0005856//cytoskeleton;GO:0043230//e…	GO:0003723//RNA binding;GO:0046983//protein dimerization activity;GO:0005515//protein binding;GO:0003676//nucleic acid binding;GO:0097159//organic cyclic compound binding;GO:0005488//binding;GO:0008092//cytoskeletal protein binding;GO:1901363//heterocyclic compound binding;GO:0019899//enzyme binding	GO:0051716//cellular response to stimulus;GO:0072657//protein localization to membrane;GO:0009987//cellular process;GO:1903047//mitotic cell cycle process;GO:0031329//regulation of cellular catabolic process;GO:0007162//negative regulation of cell adhesion;GO:0022604//regulation of cell morphogenesis;GO:0006928//movement of cell or subcellular component;GO:0001885//endothelial cell development;GO…
XP_005910612	0	32.9533	0.001	1.83333	10.8403	0.00262915	0.177471	no	HACL1	PREDICTED: 2-hydroxyacyl-CoA lyase 1 isoform X4 [Bos mutus]	Cellular Processes	Transport and catabolism	ko04146//Peroxisome	K12261	GO:0043226//organelle;GO:0044424//intracellular part;GO:0044444//cytoplasmic part;GO:0043227//membrane-bounded organelle;GO:0044439//peroxisomal part;GO:0044464//cell part;GO:0044438//microbody part;GO:0043229//intracellular organelle;GO:0042579//microbody;GO:0005622//intracellular;GO:0005737//cytoplasm;GO:0005623//cell;GO:0043231//intracellular membrane-bounded organelle;GO:0044446//intracellula…	GO:0005515//protein binding;GO:0005488//binding;GO:0036094//small molecule binding;GO:0043169//cation binding;GO:0043167//ion binding;GO:0016829//lyase activity;GO:0003824//catalytic activity;GO:0019842//vitamin binding	GO:0019752//carboxylic acid metabolic process;GO:0006631//fatty acid metabolic process;GO:0006629//lipid metabolic process;GO:0006082//organic acid metabolic process;GO:0070271//protein complex biogenesis;GO:0071704//organic substance metabolic process;GO:0044699//single-organism process;GO:0044085//cellular component biogenesis;GO:0046395//carboxylic acid catabolic process;GO:0071822//protein co…
XP_005891452	0	41.5233	0.001	1.83	10.8376	0.00199514	0.158136	no	SLC39A7	zinc transporter SLC39A7 precursor [Bos taurus]	-	-	-	-	-	-	-
XP_014332364	0	41.5233	0.001	1.83	10.8376	0.00199505	0.158136	no	SLC39A7	zinc transporter SLC39A7 precursor [Bos taurus]	-	-	-	-	-	-	-
XP_014336964	0	67.2333	0.001	1.82	10.8297	6.83e-06	0.00427303	up	LOC102274514	PREDICTED: coiled-coil domain-containing protein 162-like [Bison bison bison]	-	-	-	-	-	-	-
XP_005894568	0	35.4467	0.001	1.81667	10.8271	0.0156473	0.364395	no	NFATC2IP	PREDICTED: LOW QUALITY PROTEIN: NFATC2-interacting protein [Bos mutus]	-	-	-	-	-	-	-
XP_005907915	0	21.0467	0.001	1.81667	10.8271	0.0231812	0.416897	no	LDHAL6B	PREDICTED: L-lactate dehydrogenase A-like 6B-like isoform X1 [Bos mutus]	Organismal Systems;Metabolism	Endocrine system;Amino acid metabolism;Carbohydrate metabolism	ko04922//Glucagon signaling pathway;ko00010//Glycolysis / Gluconeogenesis;ko00620//Pyruvate metabolism;ko00270//Cysteine and methionine metabolism;ko00640//Propanoate metabolism	K00016	GO:0044464//cell part;GO:0043227//membrane-bounded organelle;GO:0043231//intracellular membrane-bounded organelle;GO:0043229//intracellular organelle;GO:0044444//cytoplasmic part;GO:0043226//organelle;GO:0044422//organelle part;GO:0005622//intracellular;GO:0044446//intracellular organelle part;GO:0005623//cell;GO:0005737//cytoplasm;GO:0005739//mitochondrion;GO:0044424//intracellular part;GO:00444…	GO:0016491//oxidoreductase activity;GO:0005488//binding;GO:0003824//catalytic activity;GO:0004457//lactate dehydrogenase activity;GO:0016614//oxidoreductase activity, acting on CH-OH group of donors	GO:0071704//organic substance metabolic process;GO:0044710//single-organism metabolic process;GO:0006082//organic acid metabolic process;GO:0044238//primary metabolic process;GO:0032787//monocarboxylic acid metabolic process;GO:0008152//metabolic process;GO:0044237//cellular metabolic process;GO:0044281//small molecule metabolic process;GO:0019752//carboxylic acid metabolic process;GO:0044699//si…
XP_005904353	0.123333	326.287	0.00666667	12.1	10.8258	0.000675095	0.0931136	no	SPATA18	PREDICTED: mitochondria-eating protein [Bos mutus]	-	-	-	-	GO:0044429//mitochondrial part;GO:0016020//membrane;GO:0005737//cytoplasm;GO:0043229//intracellular organelle;GO:0043231//intracellular membrane-bounded organelle;GO:0005740//mitochondrial envelope;GO:0044424//intracellular part;GO:0031090//organelle membrane;GO:0005622//intracellular;GO:0044464//cell part;GO:0005623//cell;GO:0044422//organelle part;GO:0031975//envelope;GO:0043227//membrane-bound…	-	GO:0006914//autophagy;GO:0000422//mitophagy;GO:0022411//cellular component disassembly;GO:1902589//single-organism organelle organization;GO:0016043//cellular component organization;GO:0033554//cellular response to stress;GO:0050896//response to stimulus;GO:0044699//single-organism process;GO:0006950//response to stress;GO:0009987//cellular process;GO:0061726//mitochondrion disassembly;GO:0051716…
XP_005889256	0	71.08	0.001	1.79333	10.8084	0.000726927	0.095269	no	MFN2	PREDICTED: mitofusin-2 isoform X1 [Bos mutus]	-	-	-	-	GO:0031975//envelope;GO:0005623//cell;GO:0043227//membrane-bounded organelle;GO:0043231//intracellular membrane-bounded organelle;GO:0044425//membrane part;GO:0005740//mitochondrial envelope;GO:0031967//organelle envelope;GO:0016020//membrane;GO:0044424//intracellular part;GO:0043232//intracellular non-membrane-bounded organelle;GO:0005856//cytoskeleton;GO:0005737//cytoplasm;GO:0044429//mitochond…	GO:0032549//ribonucleoside binding;GO:0016787//hydrolase activity;GO:0017111//nucleoside-triphosphatase activity;GO:0016818//hydrolase activity, acting on acid anhydrides, in phosphorus-containing anhydrides;GO:0044389//ubiquitin-like protein ligase binding;GO:0016462//pyrophosphatase activity;GO:0016817//hydrolase activity, acting on acid anhydrides;GO:0097367//carbohydrate derivative binding;GO…	GO:0015031//protein transport;GO:0033036//macromolecule localization;GO:0042127//regulation of cell proliferation;GO:0008104//protein localization;GO:0044700//single organism signaling;GO:0034613//cellular protein localization;GO:0006605//protein targeting;GO:0007275//multicellular organism development;GO:0023052//signaling;GO:0050789//regulation of biological process;GO:1905037//autophagosome or…
XP_005889257	0	71.08	0.001	1.79333	10.8084	0.000726981	0.095269	no	MFN2	PREDICTED: mitofusin-2 isoform X1 [Bos mutus]	-	-	-	-	GO:0005737//cytoplasm;GO:0016020//membrane;GO:0044446//intracellular organelle part;GO:0043231//intracellular membrane-bounded organelle;GO:0043232//intracellular non-membrane-bounded organelle;GO:0043226//organelle;GO:0044464//cell part;GO:0005740//mitochondrial envelope;GO:0005739//mitochondrion;GO:0031967//organelle envelope;GO:0044444//cytoplasmic part;GO:0043229//intracellular organelle;GO:0…	GO:0016787//hydrolase activity;GO:0036094//small molecule binding;GO:0001883//purine nucleoside binding;GO:0032549//ribonucleoside binding;GO:0003824//catalytic activity;GO:0001882//nucleoside binding;GO:1901363//heterocyclic compound binding;GO:0097367//carbohydrate derivative binding;GO:0044389//ubiquitin-like protein ligase binding;GO:0016462//pyrophosphatase activity;GO:0017111//nucleoside-tr…	GO:0032501//multicellular organismal process;GO:0051641//cellular localization;GO:0008285//negative regulation of cell proliferation;GO:0022607//cellular component assembly;GO:0007154//cell communication;GO:0048731//system development;GO:0007423//sensory organ development;GO:0048513//animal organ development;GO:0051179//localization;GO:0016043//cellular component organization;GO:0050794//regulati…
XP_005897203	0	45.2767	0.001	1.79333	10.8084	0.0114713	0.325429	no	ARCN1	coatomer subunit delta [Bos taurus]	-	-	-	-	GO:0030117//membrane coat;GO:0016020//membrane;GO:0044431//Golgi apparatus part;GO:0048475//coated membrane;GO:0044444//cytoplasmic part;GO:0043227//membrane-bounded organelle;GO:0043226//organelle;GO:0031982//vesicle;GO:0044424//intracellular part;GO:0031410//cytoplasmic vesicle;GO:0005794//Golgi apparatus;GO:0031090//organelle membrane;GO:0030137//COPI-coated vesicle;GO:0016023//cytoplasmic, me…	GO:0005488//binding;GO:0003676//nucleic acid binding;GO:1901363//heterocyclic compound binding;GO:0097159//organic cyclic compound binding;GO:0003723//RNA binding	GO:0021695//cerebellar cortex development;GO:0051179//localization;GO:0044767//single-organism developmental process;GO:0008104//protein localization;GO:0044699//single-organism process;GO:0048513//animal organ development;GO:0007626//locomotory behavior;GO:0060322//head development;GO:0021680//cerebellar Purkinje cell layer development;GO:0032502//developmental process;GO:0033036//macromolecule …
XP_005889496	0	60.86	0.001	1.79	10.8057	0.00107506	0.117942	no	DDX3X	ATP-dependent RNA helicase DDX3X [Bos taurus]	Organismal Systems	Immune system	ko04622//RIG-I-like receptor signaling pathway	K11594	-	-	-
XP_005897699	0	29.4867	0.001	1.78333	10.8004	0.00322925	0.192661	no	STAMBP	PREDICTED: STAM-binding protein isoform X1 [Bison bison bison]	Cellular Processes	Transport and catabolism	ko04144//Endocytosis	K11866	GO:0031981//nuclear lumen;GO:0044428//nuclear part;GO:0044424//intracellular part;GO:0031974//membrane-enclosed lumen;GO:0044421//extracellular region part;GO:0005623//cell;GO:0043230//extracellular organelle;GO:0044464//cell part;GO:0031982//vesicle;GO:0005634//nucleus;GO:0043227//membrane-bounded organelle;GO:0044446//intracellular organelle part;GO:0005576//extracellular region;GO:0043229//int…	GO:0101005//ubiquitinyl hydrolase activity;GO:0008233//peptidase activity;GO:0008234//cysteine-type peptidase activity;GO:0016787//hydrolase activity;GO:0019783//ubiquitin-like protein-specific protease activity;GO:0036459//thiol-dependent ubiquitinyl hydrolase activity;GO:0070011//peptidase activity, acting on L-amino acid peptides;GO:0005488//binding;GO:0003824//catalytic activity;GO:0005515//p…	GO:0007154//cell communication;GO:0044238//primary metabolic process;GO:0006464//cellular protein modification process;GO:0007264//small GTPase mediated signal transduction;GO:0043412//macromolecule modification;GO:0070646//protein modification by small protein removal;GO:0048017//inositol lipid-mediated signaling;GO:0071704//organic substance metabolic process;GO:0050789//regulation of biologica…
XP_005904379	0	85.0133	0.001	1.78	10.7977	0.000371247	0.0682134	no	WFS1	PREDICTED: wolframin [Bos mutus]	Genetic Information Processing	Folding, sorting and degradation	ko04141//Protein processing in endoplasmic reticulum	K14020	GO:0043229//intracellular organelle;GO:0043226//organelle;GO:0044446//intracellular organelle part;GO:0005789//endoplasmic reticulum membrane;GO:0005622//intracellular;GO:0012505//endomembrane system;GO:0044422//organelle part;GO:0044444//cytoplasmic part;GO:0044464//cell part;GO:0044425//membrane part;GO:0016020//membrane;GO:0043227//membrane-bounded organelle;GO:0005623//cell;GO:0042175//nuclea…	GO:0044389//ubiquitin-like protein ligase binding;GO:0005515//protein binding;GO:0005488//binding;GO:0019899//enzyme binding	GO:0034976//response to endoplasmic reticulum stress;GO:0008219//cell death;GO:0051234//establishment of localization;GO:0071704//organic substance metabolic process;GO:0006950//response to stress;GO:0031647//regulation of protein stability;GO:0044712//single-organism catabolic process;GO:0030802//regulation of cyclic nucleotide biosynthetic process;GO:0009987//cellular process;GO:0010941//regula…
XP_005893587	0	12.81	0.001	1.77667	10.795	0.0025944	0.176645	no	FAM168A	protein FAM168A [Bos taurus]	-	-	-	-	-	-	-
XP_005911835	0	85.63	0.001	1.77333	10.7922	0.00483227	0.231061	no	DGKZ	PREDICTED: LOW QUALITY PROTEIN: diacylglycerol kinase, zeta [Bos mutus]	Metabolism;Environmental Information Processing	Lipid metabolism;Signal transduction	ko04070//Phosphatidylinositol signaling system;ko00564//Glycerophospholipid metabolism;ko00561//Glycerolipid metabolism	K00901	GO:0043231//intracellular membrane-bounded organelle;GO:0031252//cell leading edge;GO:0044428//nuclear part;GO:0044464//cell part;GO:0043233//organelle lumen;GO:0043227//membrane-bounded organelle;GO:0005623//cell;GO:0043229//intracellular organelle;GO:0044424//intracellular part;GO:0044446//intracellular organelle part;GO:0005634//nucleus;GO:0005622//intracellular;GO:0031981//nuclear lumen;GO:00…	GO:0016772//transferase activity, transferring phosphorus-containing groups;GO:0036094//small molecule binding;GO:1901363//heterocyclic compound binding;GO:0005488//binding;GO:0032549//ribonucleoside binding;GO:0001882//nucleoside binding;GO:0016740//transferase activity;GO:0097159//organic cyclic compound binding;GO:0005515//protein binding;GO:0016301//kinase activity;GO:0032550//purine ribonucl…	GO:0006793//phosphorus metabolic process;GO:0022402//cell cycle process;GO:0016310//phosphorylation;GO:0044843//cell cycle G1/S phase transition;GO:0007186//G-protein coupled receptor signaling pathway;GO:0007154//cell communication;GO:0044699//single-organism process;GO:0051716//cellular response to stimulus;GO:0050789//regulation of biological process;GO:0050896//response to stimulus;GO:0006796…
XP_005892129	0	34.4767	0.001	1.76667	10.7868	0.0162629	0.368317	no	GOT1	PREDICTED: aspartate aminotransferase, cytoplasmic [Bos mutus]	Metabolism	Amino acid metabolism;Global and Overview	ko01200//Carbon metabolism;ko01230//Biosynthesis of amino acids;ko00330//Arginine and proline metabolism;ko00270//Cysteine and methionine metabolism;ko00250//Alanine, aspartate and glutamate metabolism;ko00350//Tyrosine metabolism;ko01210//2-Oxocarboxylic acid metabolism;ko00220//Arginine biosynthesis;ko00360//Phenylalanine metabolism;ko00400//Phenylalanine, tyrosine and tryptophan biosynthesis	K14454	-	-	-
XP_005906098	0	40.5133	0.001	1.76667	10.7868	0.00222279	0.165864	no	BCL6B	PREDICTED: B-cell CLL/lymphoma 6 member B protein [Bos mutus]	-	-	-	-	GO:0043231//intracellular membrane-bounded organelle;GO:0005622//intracellular;GO:0044424//intracellular part;GO:0044464//cell part;GO:0043229//intracellular organelle;GO:0043226//organelle;GO:0005623//cell;GO:0043227//membrane-bounded organelle	GO:0043169//cation binding;GO:0000981//RNA polymerase II transcription factor activity, sequence-specific DNA binding;GO:0005488//binding;GO:0003676//nucleic acid binding;GO:0000975//regulatory region DNA binding;GO:0043167//ion binding;GO:0001071//nucleic acid binding transcription factor activity;GO:0003677//DNA binding;GO:0097159//organic cyclic compound binding;GO:0044212//transcription regul…	GO:0044249//cellular biosynthetic process;GO:0009059//macromolecule biosynthetic process;GO:1901362//organic cyclic compound biosynthetic process;GO:0008152//metabolic process;GO:0006351//transcription, DNA-templated;GO:0034654//nucleobase-containing compound biosynthetic process;GO:0097659//nucleic acid-templated transcription;GO:0018130//heterocycle biosynthetic process;GO:0032774//RNA biosynth…
XM_005889383	0	46.3	0.001	1.76333	10.7841	0.00152319	0.138659	no	SHF	PREDICTED: Bos mutus Src homology 2 domain containing F (SHF), transcript variant X3, mRNA	-	-	-	-	-	-	-
XP_005887590	0	38.52	0.001	1.76333	10.7841	0.0142174	0.357025	no	ZBTB44	PREDICTED: zinc finger and BTB domain-containing protein 44 [Bos mutus]	-	-	-	-	-	GO:0043169//cation binding;GO:0005488//binding;GO:0043167//ion binding	-
XP_014332473	0	80.3933	0.001	1.75	10.7731	0.00525431	0.241389	no	BRD8	PREDICTED: bromodomain-containing protein 8 isoform X7 [Bison bison bison]	-	-	-	-	GO:0043233//organelle lumen;GO:0044451//nucleoplasm part;GO:0005623//cell;GO:0043189//H4/H2A histone acetyltransferase complex;GO:0043227//membrane-bounded organelle;GO:0043229//intracellular organelle;GO:0044422//organelle part;GO:0070013//intracellular organelle lumen;GO:1902562//H4 histone acetyltransferase complex;GO:1990234//transferase complex;GO:0044464//cell part;GO:0044428//nuclear part;…	-	GO:0018393//internal peptidyl-lysine acetylation;GO:0009987//cellular process;GO:0008152//metabolic process;GO:0016570//histone modification;GO:0071840//cellular component organization or biogenesis;GO:0016043//cellular component organization;GO:0043933//macromolecular complex subunit organization;GO:0044237//cellular metabolic process;GO:0016569//chromatin modification;GO:0044260//cellular macro…
XP_005906228	0	110.883	0.001	1.74667	10.7704	0.00336183	0.195813	no	PUM1	PREDICTED: pumilio homolog 1 isoform X5 [Bos mutus]	-	-	-	-	GO:0005623//cell;GO:0044464//cell part;GO:0043229//intracellular organelle;GO:0005737//cytoplasm;GO:1990904//ribonucleoprotein complex;GO:0030529//intracellular ribonucleoprotein complex;GO:0043226//organelle;GO:0044444//cytoplasmic part;GO:0032991//macromolecular complex;GO:0043228//non-membrane-bounded organelle;GO:0043232//intracellular non-membrane-bounded organelle;GO:0005622//intracellular;…	GO:0044822//poly(A) RNA binding;GO:0097159//organic cyclic compound binding;GO:0005488//binding;GO:0003723//RNA binding;GO:0003729//mRNA binding;GO:0003676//nucleic acid binding;GO:1901363//heterocyclic compound binding	GO:0034249//negative regulation of cellular amide metabolic process;GO:0009889//regulation of biosynthetic process;GO:0007610//behavior;GO:0065007//biological regulation;GO:0048518//positive regulation of biological process;GO:0022414//reproductive process;GO:0010605//negative regulation of macromolecule metabolic process;GO:0002684//positive regulation of immune system process;GO:0002682//regula…
XP_005907518	0.00333333	36.83	0.001	1.73667	10.7621	0.0149088	0.359105	no	TAPBPL	PREDICTED: tapasin-related protein [Bos mutus]	-	-	-	-	GO:0044425//membrane part;GO:0016020//membrane;GO:0031224//intrinsic component of membrane	GO:0005488//binding;GO:0005515//protein binding	-
XP_005906283	0	45.31	0.001	1.72667	10.7538	0.00229496	0.168201	no	YARS	PREDICTED: tyrosine--tRNA ligase, cytoplasmic [Bos mutus]	Genetic Information Processing	Translation	ko00970//Aminoacyl-tRNA biosynthesis	K01866	-	-	-
XP_014337470	0.00333333	39.53	0.001	1.72667	10.7538	0.0038484	0.208919	no	TULP3	PREDICTED: tubby-related protein 3 isoform X1 [Bos taurus]	-	-	-	-	-	-	-
XP_005900111	0	12.1233	0.001	1.69667	10.7285	0.00260007	0.176757	no	VAMP7	vesicle-associated membrane protein 7 [Bos taurus]	Genetic Information Processing	Folding, sorting and degradation	ko04130//SNARE interactions in vesicular transport	K08515	-	-	-
XP_005910911	0	152.473	0.001	1.69	10.7228	0.000250704	0.0567866	no	DNMT1	PREDICTED: DNA (cytosine-5)-methyltransferase 1 [Bos mutus]	Metabolism	Amino acid metabolism	ko00270//Cysteine and methionine metabolism	K00558	GO:0044422//organelle part;GO:0043232//intracellular non-membrane-bounded organelle;GO:0043229//intracellular organelle;GO:0044464//cell part;GO:0005694//chromosome;GO:0000775//chromosome, centromeric region;GO:0005622//intracellular;GO:0043231//intracellular membrane-bounded organelle;GO:0044424//intracellular part;GO:0043226//organelle;GO:0044446//intracellular organelle part;GO:0098687//chromo…	GO:0046914//transition metal ion binding;GO:0016740//transferase activity;GO:0008168//methyltransferase activity;GO:0036094//small molecule binding;GO:0000166//nucleotide binding;GO:0043167//ion binding;GO:0016741//transferase activity, transferring one-carbon groups;GO:0005488//binding;GO:0003824//catalytic activity;GO:0003676//nucleic acid binding;GO:1901265//nucleoside phosphate binding;GO:009…	GO:1901360//organic cyclic compound metabolic process;GO:0009987//cellular process;GO:0051130//positive regulation of cellular component organization;GO:1905268//negative regulation of chromatin organization;GO:0071704//organic substance metabolic process;GO:0006306//DNA methylation;GO:1903507//negative regulation of nucleic acid-templated transcription;GO:0032270//positive regulation of cellular…
XP_005908506	0	28.8267	0.001	1.68667	10.72	0.0202646	0.401891	no	CDK9	cyclin-dependent kinase 9 [Bos taurus]	-	-	-	-	GO:0031974//membrane-enclosed lumen;GO:0005634//nucleus;GO:0043233//organelle lumen;GO:0043231//intracellular membrane-bounded organelle;GO:0044451//nucleoplasm part;GO:0043229//intracellular organelle;GO:0043226//organelle;GO:0044464//cell part;GO:0044422//organelle part;GO:0043227//membrane-bounded organelle;GO:0005623//cell;GO:0044424//intracellular part;GO:0016604//nuclear body;GO:0070013//in…	GO:0001221//transcription cofactor binding;GO:0005515//protein binding;GO:0000975//regulatory region DNA binding;GO:0001882//nucleoside binding;GO:0004674//protein serine/threonine kinase activity;GO:0003723//RNA binding;GO:0097159//organic cyclic compound binding;GO:0017069//snRNA binding;GO:0001883//purine nucleoside binding;GO:0044212//transcription regulatory region DNA binding;GO:0016772//tr…	GO:0045786//negative regulation of cell cycle;GO:0034641//cellular nitrogen compound metabolic process;GO:0044238//primary metabolic process;GO:0006378//mRNA polyadenylation;GO:1903322//positive regulation of protein modification by small protein conjugation or removal;GO:0007049//cell cycle;GO:0048856//anatomical structure development;GO:0051716//cellular response to stimulus;GO:0034654//nucleob…
XP_014333355	0	13.2333	0.001	1.68667	10.72	0.0149122	0.359105	no	LOC102265885	PREDICTED: UPF0568 protein C14orf166 homolog isoform X3 [Physeter catodon]	-	-	-	-	GO:0043229//intracellular organelle;GO:0070013//intracellular organelle lumen;GO:0031981//nuclear lumen;GO:0043231//intracellular membrane-bounded organelle;GO:0044428//nuclear part;GO:0043234//protein complex;GO:0043226//organelle;GO:0043227//membrane-bounded organelle;GO:0005623//cell;GO:0031974//membrane-enclosed lumen;GO:0005634//nucleus;GO:0032991//macromolecular complex;GO:0043233//organell…	GO:0003676//nucleic acid binding;GO:0005488//binding;GO:0003723//RNA binding;GO:0097159//organic cyclic compound binding;GO:1901363//heterocyclic compound binding;GO:0005515//protein binding	GO:0006366//transcription from RNA polymerase II promoter;GO:1901362//organic cyclic compound biosynthetic process;GO:0006396//RNA processing;GO:0010467//gene expression;GO:0044249//cellular biosynthetic process;GO:0008152//metabolic process;GO:0006807//nitrogen compound metabolic process;GO:0009987//cellular process;GO:0097659//nucleic acid-templated transcription;GO:0034641//cellular nitrogen c…
XP_005908355	0	49.9267	0.001	1.68333	10.7171	7.12e-05	0.0255286	up	AIFM1	apoptosis-inducing factor 1, mitochondrial [Bos taurus]	Cellular Processes	Cell growth and death	ko04210//Apoptosis	K04727	GO:0044446//intracellular organelle part;GO:0044424//intracellular part;GO:0031967//organelle envelope;GO:0044425//membrane part;GO:0044464//cell part;GO:0016020//membrane;GO:0005622//intracellular;GO:0044444//cytoplasmic part;GO:0043226//organelle;GO:0043227//membrane-bounded organelle;GO:0031975//envelope;GO:0031224//intrinsic component of membrane;GO:0044429//mitochondrial part;GO:0005623//cel…	GO:0097159//organic cyclic compound binding;GO:0003824//catalytic activity;GO:0005515//protein binding;GO:1901363//heterocyclic compound binding;GO:0050660//flavin adenine dinucleotide binding;GO:0048037//cofactor binding;GO:0005488//binding;GO:0036094//small molecule binding;GO:0050664//oxidoreductase activity, acting on NAD(P)H, oxygen as acceptor;GO:0016491//oxidoreductase activity;GO:0016651/…	GO:0050790//regulation of catalytic activity;GO:0044238//primary metabolic process;GO:0043068//positive regulation of programmed cell death;GO:0044237//cellular metabolic process;GO:0097194//execution phase of apoptosis;GO:0008152//metabolic process;GO:2000116//regulation of cysteine-type endopeptidase activity;GO:0044699//single-organism process;GO:0090304//nucleic acid metabolic process;GO:0032…
XP_014332815	0	6.78667	0.001	1.68	10.7142	0.0445363	0.527113	no	FIS1	PREDICTED: mitochondrial fission 1 protein isoform X1 [Pantholops hodgsonii]	-	-	-	-	GO:0005777//peroxisome;GO:0044425//membrane part;GO:0044446//intracellular organelle part;GO:0031975//envelope;GO:0044422//organelle part;GO:0005623//cell;GO:0043229//intracellular organelle;GO:0005740//mitochondrial envelope;GO:0044444//cytoplasmic part;GO:0031967//organelle envelope;GO:0005741//mitochondrial outer membrane;GO:0031903//microbody membrane;GO:0044424//intracellular part;GO:0005739…	GO:0005515//protein binding;GO:0005488//binding	GO:0072657//protein localization to membrane;GO:0065007//biological regulation;GO:0000266//mitochondrial fission;GO:0051560//mitochondrial calcium ion homeostasis;GO:0009987//cellular process;GO:0043065//positive regulation of apoptotic process;GO:0051641//cellular localization;GO:0072507//divalent inorganic cation homeostasis;GO:0008219//cell death;GO:0044699//single-organism process;GO:0055074/…
XM_005908243	0	42.1667	0.001	1.66	10.697	0.00964561	0.303337	no	DPF1	PREDICTED: Bos mutus D4, zinc and double PHD fingers family 1 (DPF1), transcript variant X3, mRNA	-	-	-	-	GO:0090544//BAF-type complex;GO:0044446//intracellular organelle part;GO:0032991//macromolecular complex;GO:0043229//intracellular organelle;GO:0005623//cell;GO:0044464//cell part;GO:0044424//intracellular part;GO:0005622//intracellular;GO:0043226//organelle;GO:0043234//protein complex;GO:0043227//membrane-bounded organelle;GO:0070603//SWI/SNF superfamily-type complex;GO:0044428//nuclear part;GO:…	GO:0043167//ion binding;GO:0046872//metal ion binding;GO:0043169//cation binding;GO:0005488//binding;GO:0046914//transition metal ion binding	GO:0007275//multicellular organism development;GO:0044249//cellular biosynthetic process;GO:0006351//transcription, DNA-templated;GO:0034645//cellular macromolecule biosynthetic process;GO:1901576//organic substance biosynthetic process;GO:0008219//cell death;GO:0006139//nucleobase-containing compound metabolic process;GO:0032502//developmental process;GO:1901362//organic cyclic compound biosynth…
XP_005901462	0	4.69333	0.001	1.65333	10.6912	0.0379241	0.501614	no	MTURN	maturin [Homo sapiens]	-	-	-	-	-	-	GO:0048869//cellular developmental process;GO:0048731//system development;GO:0022008//neurogenesis;GO:0030154//cell differentiation;GO:0044767//single-organism developmental process;GO:0044707//single-multicellular organism process;GO:0009987//cellular process;GO:0032501//multicellular organismal process;GO:0048699//generation of neurons;GO:0044763//single-organism cellular process;GO:0007399//ne…
XP_005887960	0	63.91	0.001	1.64333	10.6824	0.00719766	0.272809	no	KIF3B	kinesin-like protein KIF3B [Bos taurus]	-	-	-	-	GO:0043226//organelle;GO:0005875//microtubule associated complex;GO:0015630//microtubule cytoskeleton;GO:0097458//neuron part;GO:0044444//cytoplasmic part;GO:0042995//cell projection;GO:0044463//cell projection part;GO:0031982//vesicle;GO:0005819//spindle;GO:0032991//macromolecular complex;GO:0043232//intracellular non-membrane-bounded organelle;GO:0005929//cilium;GO:0005856//cytoskeleton;GO:0044…	GO:0015631//tubulin binding;GO:0032550//purine ribonucleoside binding;GO:0016887//ATPase activity;GO:0001882//nucleoside binding;GO:0032549//ribonucleoside binding;GO:0016817//hydrolase activity, acting on acid anhydrides;GO:0005515//protein binding;GO:0005488//binding;GO:0003824//catalytic activity;GO:0016787//hydrolase activity;GO:0031267//small GTPase binding;GO:0036094//small molecule binding…	GO:0044767//single-organism developmental process;GO:0006810//transport;GO:0051650//establishment of vesicle localization;GO:0000910//cytokinesis;GO:0009987//cellular process;GO:0007017//microtubule-based process;GO:0007049//cell cycle;GO:0030705//cytoskeleton-dependent intracellular transport;GO:0007275//multicellular organism development;GO:0022402//cell cycle process;GO:0032501//multicellular …
XP_005889272	0	22.9433	0.001	1.64	10.6795	0.0150118	0.359105	no	MAT2B	PREDICTED: methionine adenosyltransferase 2 subunit beta isoform X2 [Bos mutus]	Metabolism	Amino acid metabolism;Global and Overview	ko01230//Biosynthesis of amino acids;ko00270//Cysteine and methionine metabolism	K00789	GO:0005576//extracellular region;GO:0043227//membrane-bounded organelle;GO:0044421//extracellular region part;GO:0031982//vesicle;GO:0043226//organelle;GO:0044444//cytoplasmic part;GO:0043231//intracellular membrane-bounded organelle;GO:0043230//extracellular organelle;GO:0044464//cell part;GO:0005623//cell;GO:0005737//cytoplasm;GO:1903561//extracellular vesicle;GO:0005622//intracellular;GO:00444…	GO:0098772//molecular function regulator;GO:0005515//protein binding;GO:0005488//binding;GO:0030234//enzyme regulator activity	GO:0009058//biosynthetic process;GO:0006732//coenzyme metabolic process;GO:0009108//coenzyme biosynthetic process;GO:0051188//cofactor biosynthetic process;GO:0044249//cellular biosynthetic process;GO:0051186//cofactor metabolic process;GO:0009987//cellular process;GO:0044237//cellular metabolic process;GO:0065007//biological regulation;GO:0065009//regulation of molecular function;GO:0008152//met…
XP_005894635	0	84.9833	0.001	1.63667	10.6765	0.000390645	0.0694616	no	SNCAIP	PREDICTED: synphilin-1 isoform X1 [Bos mutus]	-	-	-	-	-	GO:0005515//protein binding;GO:0044389//ubiquitin-like protein ligase binding;GO:0005488//binding;GO:0019899//enzyme binding	GO:0008152//metabolic process;GO:0006584//catecholamine metabolic process;GO:0044237//cellular metabolic process;GO:0071704//organic substance metabolic process;GO:0006725//cellular aromatic compound metabolic process;GO:0001505//regulation of neurotransmitter levels;GO:1901615//organic hydroxy compound metabolic process;GO:0065008//regulation of biological quality;GO:0065007//biological regulati…
XP_014338220	0	17.0533	0.001	1.63667	10.6765	0.0100092	0.306966	no	VAT1	Synaptic vesicle membrane protein VAT-1-like protein, partial [Bos mutus]	-	-	-	-	GO:0043230//extracellular organelle;GO:0044421//extracellular region part;GO:0005576//extracellular region;GO:0043227//membrane-bounded organelle;GO:0043226//organelle;GO:1903561//extracellular vesicle;GO:0031982//vesicle	GO:0003824//catalytic activity	GO:0008152//metabolic process;GO:0044763//single-organism cellular process;GO:0044710//single-organism metabolic process;GO:0061025//membrane fusion;GO:0007005//mitochondrion organization;GO:0044801//single-organism membrane fusion;GO:0008053//mitochondrial fusion;GO:0044802//single-organism membrane organization;GO:0071840//cellular component organization or biogenesis;GO:0016043//cellular compo…
XP_005904457	0	33.62	0.001	1.63	10.6707	0.0167168	0.371115	no	DBNL	PREDICTED: drebrin-like protein isoform X1 [Bos mutus]	-	-	-	-	GO:0043232//intracellular non-membrane-bounded organelle;GO:0030135//coated vesicle;GO:0043226//organelle;GO:0012505//endomembrane system;GO:0031252//cell leading edge;GO:0044424//intracellular part;GO:0005856//cytoskeleton;GO:1903561//extracellular vesicle;GO:0043227//membrane-bounded organelle;GO:0044421//extracellular region part;GO:0044444//cytoplasmic part;GO:0005737//cytoplasm;GO:0015629//a…	GO:0005515//protein binding;GO:0008092//cytoskeletal protein binding;GO:0003779//actin binding;GO:0005488//binding	GO:0050794//regulation of cellular process;GO:0006461//protein complex assembly;GO:0016043//cellular component organization;GO:0065007//biological regulation;GO:0044767//single-organism developmental process;GO:0022607//cellular component assembly;GO:0030031//cell projection assembly;GO:0006955//immune response;GO:0048869//cellular developmental process;GO:0065003//macromolecular complex assembly…
XP_005909416	0	21.0867	0.001	1.62667	10.6677	0.00686323	0.268285	no	SLC25A20	PREDICTED: mitochondrial carnitine/acylcarnitine carrier protein [Bos mutus]	-	-	-	-	-	-	-
XP_005887874	0	44.4767	0.001	1.62333	10.6647	0.0117989	0.329453	no	GLYR1	PREDICTED: LOW QUALITY PROTEIN: glyoxylate reductase 1 homolog (Arabidopsis) [Macaca fascicularis]	-	-	-	-	GO:0044424//intracellular part;GO:0044422//organelle part;GO:0043226//organelle;GO:0043227//membrane-bounded organelle;GO:0043233//organelle lumen;GO:0044428//nuclear part;GO:0005634//nucleus;GO:0005623//cell;GO:0031981//nuclear lumen;GO:0044464//cell part;GO:0043229//intracellular organelle;GO:0043231//intracellular membrane-bounded organelle;GO:0005622//intracellular;GO:0070013//intracellular o…	GO:0000166//nucleotide binding;GO:1901265//nucleoside phosphate binding;GO:0003824//catalytic activity;GO:1901363//heterocyclic compound binding;GO:0036094//small molecule binding;GO:0016614//oxidoreductase activity, acting on CH-OH group of donors;GO:0016616//oxidoreductase activity, acting on the CH-OH group of donors, NAD or NADP as acceptor;GO:0005515//protein binding;GO:0042393//histone bind…	GO:0008152//metabolic process;GO:0044699//single-organism process;GO:0044710//single-organism metabolic process
XP_005906416	0	109.903	0.001	1.62333	10.6647	0.00340278	0.197008	no	PHKA2	PREDICTED: LOW QUALITY PROTEIN: phosphorylase b kinase regulatory subunit alpha, liver isoform [Bos mutus]	Organismal Systems;Environmental Information Processing	Signal transduction;Endocrine system	ko04020//Calcium signaling pathway;ko04910//Insulin signaling pathway;ko04922//Glucagon signaling pathway	K07190	-	-	-
XM_005896643	0	31.4267	0.001	1.62	10.6618	0.0142521	0.357025	no	SCFD1	PREDICTED: Bos mutus sec1 family domain containing 1 (SCFD1), transcript variant X4, mRNA	-	-	-	-	GO:0043226//organelle;GO:0043227//membrane-bounded organelle;GO:0043231//intracellular membrane-bounded organelle;GO:0043229//intracellular organelle;GO:0044424//intracellular part;GO:0005623//cell;GO:0044464//cell part;GO:0005622//intracellular	-	GO:0050896//response to stimulus;GO:0071840//cellular component organization or biogenesis;GO:0033036//macromolecule localization;GO:0045184//establishment of protein localization;GO:0008104//protein localization;GO:0044085//cellular component biogenesis;GO:0044699//single-organism process;GO:0006810//transport;GO:0006996//organelle organization;GO:0016192//vesicle-mediated transport;GO:0009987//…
XP_005909426	0	66.3167	0.001	1.61667	10.6588	0.00680427	0.26743	no	QRICH1	glutamine-rich protein 1 [Bos taurus]	-	-	-	-	-	-	-
XP_014339022	0	9.22	0.001	1.61667	10.6588	0.0229448	0.416745	no	LOC106701665	PREDICTED: LOW QUALITY PROTEIN: ninein-like protein isoform X1 [Bos taurus]	-	-	-	-	-	-	-
XP_005900918	0	93.4533	0.001	1.61	10.6528	0.00424734	0.220446	no	DAAM1	PREDICTED: disheveled-associated activator of morphogenesis 1 isoform X3 [Bos mutus]	Environmental Information Processing	Signal transduction	ko04310//Wnt signaling pathway	K04512	GO:0044424//intracellular part;GO:0005623//cell;GO:0016020//membrane;GO:0005622//intracellular;GO:0044464//cell part	GO:0008092//cytoskeletal protein binding;GO:0005488//binding;GO:0005515//protein binding;GO:0019899//enzyme binding;GO:0031267//small GTPase binding;GO:0051020//GTPase binding;GO:0017016//Ras GTPase binding	GO:0071840//cellular component organization or biogenesis;GO:0006996//organelle organization;GO:0007010//cytoskeleton organization;GO:0016043//cellular component organization;GO:0009987//cellular process
XP_005898140	0	16.9667	0.001	1.59667	10.6408	0.0295434	0.457022	no	ACTR3	PREDICTED: actin-related protein 3 isoform X2 [Orcinus orca]	-	-	-	-	GO:0044464//cell part;GO:0098862//cluster of actin-based cell projections;GO:0005576//extracellular region;GO:0043228//non-membrane-bounded organelle;GO:0043232//intracellular non-membrane-bounded organelle;GO:0031252//cell leading edge;GO:0070161//anchoring junction;GO:0044424//intracellular part;GO:0005623//cell;GO:0005737//cytoplasm;GO:0015629//actin cytoskeleton;GO:0030054//cell junction;GO:0…	GO:0097367//carbohydrate derivative binding;GO:0036094//small molecule binding;GO:0032550//purine ribonucleoside binding;GO:1901363//heterocyclic compound binding;GO:0032549//ribonucleoside binding;GO:0005488//binding;GO:0008092//cytoskeletal protein binding;GO:0005515//protein binding;GO:0005198//structural molecule activity;GO:0097159//organic cyclic compound binding;GO:0001882//nucleoside bind…	GO:0044767//single-organism developmental process;GO:0030832//regulation of actin filament length;GO:0033043//regulation of organelle organization;GO:0048583//regulation of response to stimulus;GO:0032990//cell part morphogenesis;GO:0048522//positive regulation of cellular process;GO:0006996//organelle organization;GO:0051130//positive regulation of cellular component organization;GO:0043254//reg…
XP_005909601	0	48.2	0.001	1.58333	10.6287	0.00169398	0.148612	no	KLHL24	kelch-like protein 24 [Bos taurus]	-	-	-	-	-	-	-
XP_005904443	0	86.4733	0.001	1.57667	10.6227	0.00478646	0.230492	no	POP1	PREDICTED: ribonucleases P/MRP protein subunit POP1 [Bos mutus]	Genetic Information Processing	Translation	ko03013//RNA transport;ko03008//Ribosome biogenesis in eukaryotes	K01164	GO:0044421//extracellular region part;GO:0005576//extracellular region	GO:1901363//heterocyclic compound binding;GO:0003723//RNA binding;GO:0005488//binding;GO:0004540//ribonuclease activity;GO:0097159//organic cyclic compound binding;GO:0004518//nuclease activity;GO:0016787//hydrolase activity;GO:0016788//hydrolase activity, acting on ester bonds;GO:0003824//catalytic activity;GO:0003676//nucleic acid binding	GO:0044238//primary metabolic process;GO:0046483//heterocycle metabolic process;GO:0006139//nucleobase-containing compound metabolic process;GO:0090501//RNA phosphodiester bond hydrolysis;GO:0090304//nucleic acid metabolic process;GO:0044237//cellular metabolic process;GO:0090305//nucleic acid phosphodiester bond hydrolysis;GO:0006807//nitrogen compound metabolic process;GO:0008033//tRNA processi…
XP_005892675	0	69.3667	0.001	1.57	10.6165	0.0020106	0.158407	no	PPP4R3A	PREDICTED: serine/threonine-protein phosphatase 4 regulatory subunit 3A isoform X1 [Bos taurus]	Organismal Systems	Endocrine system	ko04922//Glucagon signaling pathway	K17491	-	-	-
XM_005900675	0	42.9867	0.001	1.56333	10.6104	0.00928375	0.298386	no	ZDHHC13	PREDICTED: Bos mutus zinc finger, DHHC-type containing 13 (ZDHHC13), transcript variant X2, mRNA	-	-	-	-	GO:0044464//cell part;GO:0044424//intracellular part;GO:0043227//membrane-bounded organelle;GO:0043229//intracellular organelle;GO:0016020//membrane;GO:0005794//Golgi apparatus;GO:0005737//cytoplasm;GO:0044444//cytoplasmic part;GO:0005622//intracellular;GO:0044422//organelle part;GO:0012505//endomembrane system;GO:0000139//Golgi membrane;GO:0031090//organelle membrane;GO:0044425//membrane part;GO…	GO:0046873//metal ion transmembrane transporter activity;GO:0022891//substrate-specific transmembrane transporter activity;GO:0015075//ion transmembrane transporter activity;GO:0046914//transition metal ion binding;GO:0016746//transferase activity, transferring acyl groups;GO:0046872//metal ion binding;GO:0043169//cation binding;GO:0043167//ion binding;GO:0005488//binding;GO:0016409//palmitoyltra…	GO:0051716//cellular response to stimulus;GO:0007165//signal transduction;GO:0044699//single-organism process;GO:0055085//transmembrane transport;GO:0007249//I-kappaB kinase/NF-kappaB signaling;GO:0065007//biological regulation;GO:0006810//transport;GO:0050896//response to stimulus;GO:0050794//regulation of cellular process;GO:0044700//single organism signaling;GO:0044763//single-organism cellula…
XM_005901928	0	37.1833	0.001	1.56	10.6073	0.00220675	0.165864	no	BMP4	PREDICTED: Bos mutus bone morphogenetic protein 4 (BMP4), transcript variant X3, mRNA	Cellular Processes;Environmental Information Processing	Signal transduction;Cellular commiunity;Signaling molecules and interaction	ko04060//Cytokine-cytokine receptor interaction;ko04390//Hippo signaling pathway;ko04550//Signaling pathways regulating pluripotency of stem cells;ko04350//TGF-beta signaling pathway;ko04340//Hedgehog signaling pathway	K04662	-	-	-
XP_014332707	0	39.9933	0.001	1.56	10.6073	0.00448751	0.225664	no	BCAS1	PREDICTED: breast carcinoma-amplified sequence 1 isoform X8 [Bos taurus]	-	-	-	-	-	-	-
XM_005894633	0	58.5467	0.001	1.55	10.5981	0.00806208	0.281878	no	DLG2	PREDICTED: Bos mutus discs, large homolog 2 (Drosophila) (DLG2), transcript variant X2, mRNA	Environmental Information Processing	Signal transduction	ko04390//Hippo signaling pathway	K12075	GO:0099572//postsynaptic specialization;GO:0005622//intracellular;GO:0005623//cell;GO:0043005//neuron projection;GO:0014069//postsynaptic density;GO:0071944//cell periphery;GO:0042995//cell projection;GO:0098794//postsynapse;GO:0044463//cell projection part;GO:0005886//plasma membrane;GO:0060076//excitatory synapse;GO:0044456//synapse part;GO:0044464//cell part;GO:0045202//synapse;GO:0097458//neu…	GO:0019899//enzyme binding;GO:0005515//protein binding;GO:0005488//binding	GO:0051174//regulation of phosphorus metabolic process;GO:0050794//regulation of cellular process;GO:0035303//regulation of dephosphorylation;GO:0007600//sensory perception;GO:0010921//regulation of phosphatase activity;GO:0050789//regulation of biological process;GO:0031323//regulation of cellular metabolic process;GO:0003008//system process;GO:0051336//regulation of hydrolase activity;GO:006500…
XP_005906546	0	41.15	0.001	1.54333	10.5918	0.00511308	0.23739	no	ACBD5	PREDICTED: acyl-CoA-binding domain-containing protein 5 isoform X1 [Bison bison bison]	-	-	-	-	GO:0042579//microbody;GO:0005622//intracellular;GO:0005634//nucleus;GO:0005777//peroxisome;GO:0044464//cell part;GO:0044446//intracellular organelle part;GO:0031981//nuclear lumen;GO:0043231//intracellular membrane-bounded organelle;GO:0005737//cytoplasm;GO:0044439//peroxisomal part;GO:0005623//cell;GO:0044422//organelle part;GO:0016020//membrane;GO:0070013//intracellular organelle lumen;GO:00444…	GO:0043167//ion binding;GO:0043168//anion binding;GO:0005488//binding	GO:0051234//establishment of localization;GO:0006914//autophagy;GO:0009987//cellular process;GO:0051179//localization
XM_005898683	0	60.5233	0.001	1.54	10.5887	9.38e-06	0.00554244	up	THBS3	PREDICTED: Bos mutus thrombospondin 3 (THBS3), transcript variant X3, mRNA	Environmental Information Processing;Cellular Processes	Cellular commiunity;Transport and catabolism;Signal transduction;Signaling molecules and interaction	ko04151//PI3K-Akt signaling pathway;ko04510//Focal adhesion;ko04145//Phagosome;ko04512//ECM-receptor interaction	K04659	GO:0044424//intracellular part;GO:0044444//cytoplasmic part;GO:0005622//intracellular;GO:0044464//cell part;GO:0005737//cytoplasm;GO:0005623//cell	GO:0005539//glycosaminoglycan binding;GO:0005488//binding;GO:0046872//metal ion binding;GO:0097367//carbohydrate derivative binding;GO:0043169//cation binding;GO:0043167//ion binding	GO:0098868//bone growth;GO:0031589//cell-substrate adhesion;GO:0048589//developmental growth;GO:0048856//anatomical structure development;GO:0007155//cell adhesion;GO:0009653//anatomical structure morphogenesis;GO:0007275//multicellular organism development;GO:0048731//system development;GO:0044699//single-organism process;GO:0003416//endochondral bone growth;GO:0022610//biological adhesion;GO:00…
XP_005899415	0	88.3833	0.001	1.54	10.5887	0.000543105	0.0824861	no	UBA1	ubiquitin-like modifier-activating enzyme 1 [Bos taurus]	Genetic Information Processing	Folding, sorting and degradation	ko04120//Ubiquitin mediated proteolysis	K03178	-	-	-
XP_005899416	0	88.3833	0.001	1.54	10.5887	0.000542978	0.0824861	no	UBA1	ubiquitin-like modifier-activating enzyme 1 [Bos taurus]	Genetic Information Processing	Folding, sorting and degradation	ko04120//Ubiquitin mediated proteolysis	K03178	-	-	-
XP_005902653	0	18.68	0.001	1.52333	10.573	0.0083178	0.286161	no	RGR	RPE-retinal G protein-coupled receptor [Bos taurus]	-	-	-	-	GO:0044464//cell part;GO:0071944//cell periphery;GO:0044425//membrane part;GO:0031224//intrinsic component of membrane;GO:0005623//cell;GO:0005886//plasma membrane;GO:0016020//membrane	GO:0004888//transmembrane signaling receptor activity;GO:0004871//signal transducer activity;GO:0060089//molecular transducer activity;GO:0099600//transmembrane receptor activity;GO:0004872//receptor activity;GO:0038023//signaling receptor activity	GO:0044763//single-organism cellular process;GO:0007600//sensory perception;GO:0050953//sensory perception of light stimulus;GO:0036211//protein modification process;GO:0044267//cellular protein metabolic process;GO:0044699//single-organism process;GO:0050789//regulation of biological process;GO:0008152//metabolic process;GO:0051716//cellular response to stimulus;GO:0019538//protein metabolic pro…
XP_005893696	0	48.28	0.001	1.52	10.5699	0.000218365	0.0528807	no	ZDHHC17	palmitoyltransferase ZDHHC17 [Bos taurus]	-	-	-	-	GO:0043231//intracellular membrane-bounded organelle;GO:0005794//Golgi apparatus;GO:0098588//bounding membrane of organelle;GO:0044431//Golgi apparatus part;GO:0043229//intracellular organelle;GO:0005623//cell;GO:0044444//cytoplasmic part;GO:0005622//intracellular;GO:0044446//intracellular organelle part;GO:0044422//organelle part;GO:0043227//membrane-bounded organelle;GO:0016020//membrane;GO:001…	GO:0005215//transporter activity;GO:0043167//ion binding;GO:0015075//ion transmembrane transporter activity;GO:0022891//substrate-specific transmembrane transporter activity;GO:0016747//transferase activity, transferring acyl groups other than amino-acyl groups;GO:0005488//binding;GO:0005515//protein binding;GO:0022890//inorganic cation transmembrane transporter activity;GO:0016740//transferase a…	GO:0019538//protein metabolic process;GO:0042157//lipoprotein metabolic process;GO:0023052//signaling;GO:0044700//single organism signaling;GO:0006497//protein lipidation;GO:0071704//organic substance metabolic process;GO:0044763//single-organism cellular process;GO:0071702//organic substance transport;GO:0007249//I-kappaB kinase/NF-kappaB signaling;GO:0009058//biosynthetic process;GO:0035556//in…
XP_014333904	0	70.5533	0.001	1.52	10.5699	0.00625939	0.260214	no	PRPF40B	PREDICTED: pre-mRNA-processing factor 40 homolog B isoform X2 [Bison bison bison]	Genetic Information Processing	Transcription	ko03040//Spliceosome	K12821	-	-	-
XP_005900749	0.0166667	24.9233	0.001	1.51667	10.5667	0.0239501	0.423033	no	LOC102274962	PREDICTED: L-lactate dehydrogenase A chain isoform X1 [Bos mutus]	Organismal Systems;Metabolism	Amino acid metabolism;Endocrine system;Carbohydrate metabolism	ko04922//Glucagon signaling pathway;ko00010//Glycolysis / Gluconeogenesis;ko00620//Pyruvate metabolism;ko00270//Cysteine and methionine metabolism;ko00640//Propanoate metabolism	K00016	GO:0005623//cell;GO:0044464//cell part;GO:0005622//intracellular;GO:0044424//intracellular part	GO:0004457//lactate dehydrogenase activity;GO:0016614//oxidoreductase activity, acting on CH-OH group of donors;GO:0016491//oxidoreductase activity;GO:0003824//catalytic activity	GO:0008152//metabolic process;GO:0043436//oxoacid metabolic process;GO:0044763//single-organism cellular process;GO:0006082//organic acid metabolic process;GO:0044699//single-organism process;GO:0009987//cellular process;GO:0044281//small molecule metabolic process;GO:0044237//cellular metabolic process;GO:0044238//primary metabolic process;GO:0044710//single-organism metabolic process;GO:0071704…
XP_005888982	0	84.0167	0.001	1.51333	10.5635	0.00497329	0.233779	no	PLEKHM2	PREDICTED: pleckstrin homology domain-containing family M member 2 [Bos mutus]	-	-	-	-	-	GO:0008092//cytoskeletal protein binding;GO:0005488//binding;GO:0005515//protein binding	GO:0051179//localization;GO:0033036//macromolecule localization;GO:0008104//protein localization
XP_005900193	0	83.81	0.001	1.51333	10.5635	3.96e-06	0.00273844	up	GLTSCR1L	PREDICTED: GLTSCR1-like protein isoform X1 [Bos mutus]	-	-	-	-	-	-	-
XP_005900194	0	83.81	0.001	1.51333	10.5635	3.96e-06	0.00273844	up	GLTSCR1L	PREDICTED: GLTSCR1-like protein isoform X1 [Bos mutus]	-	-	-	-	-	-	-
XP_005899327	0	19.5833	0.001	1.51	10.5603	0.00855026	0.288448	no	CRKL	PREDICTED: crk-like protein [Bos mutus]	Environmental Information Processing;Organismal Systems;Cellular Processes	Endocrine system;Immune system;Cell motility;Cellular commiunity;Signal transduction;Nervous system	ko04010//MAPK signaling pathway;ko04510//Focal adhesion;ko04810//Regulation of actin cytoskeleton;ko04015//Rap1 signaling pathway;ko04062//Chemokine signaling pathway;ko04910//Insulin signaling pathway;ko04722//Neurotrophin signaling pathway;ko04012//ErbB signaling pathway;ko04666//Fc gamma R-mediated phagocytosis	K04438	GO:0005576//extracellular region;GO:0005622//intracellular;GO:0043231//intracellular membrane-bounded organelle;GO:0044421//extracellular region part;GO:0031982//vesicle;GO:0044464//cell part;GO:0043227//membrane-bounded organelle;GO:0005623//cell;GO:0005737//cytoplasm;GO:0043230//extracellular organelle;GO:0044444//cytoplasmic part;GO:1903561//extracellular vesicle;GO:0005773//vacuole;GO:0043226…	GO:0003676//nucleic acid binding;GO:0003723//RNA binding;GO:1901363//heterocyclic compound binding;GO:0060090//binding, bridging;GO:0005515//protein binding;GO:0097159//organic cyclic compound binding;GO:0030674//protein binding, bridging;GO:0005488//binding	GO:0072359//circulatory system development;GO:0008152//metabolic process;GO:0032501//multicellular organismal process;GO:0009653//anatomical structure morphogenesis;GO:0044699//single-organism process;GO:0044267//cellular protein metabolic process;GO:0008283//cell proliferation;GO:0072358//cardiovascular system development;GO:0044238//primary metabolic process;GO:0035556//intracellular signal tra…
XP_014332280	0	8.82333	0.001	1.50667	10.5571	0.0272455	0.442153	no	LOC102273079	PREDICTED: nuclear autoantigen Sp-100-like [Bison bison bison]	-	-	-	-	-	-	-
XP_005900913	0	20.88	0.001	1.50333	10.5539	0.00741935	0.274416	no	GNAI1	PREDICTED: guanine nucleotide-binding protein G(i) subunit alpha-1 isoform X3 [Bos mutus]	Environmental Information Processing;Organismal Systems;Cellular Processes	Digestive system;Endocrine system;Circulatory system;Cellular commiunity;Immune system;Nervous system;Signal transduction;Environmental adaptation;Development	ko04024//cAMP signaling pathway;ko04015//Rap1 signaling pathway;ko04261//Adrenergic signaling in cardiomyocytes;ko04022//cGMP - PKG signaling pathway;ko04062//Chemokine signaling pathway;ko04921//Oxytocin signaling pathway;ko04360//Axon guidance;ko04728//Dopaminergic synapse;ko04530//Tight junction;ko04071//Sphingolipid signaling pathway;ko04670//Leukocyte transendothelial migration;ko04611//Plat…	K04630	-	-	-
XP_005909758	0	32.55	0.001	1.5	10.5507	0.00024054	0.0556844	no	SGCE	PREDICTED: epsilon-sarcoglycan isoform X1 [Bos mutus]	-	-	-	-	-	-	-
XP_005898186	0	123.517	0.001	1.49667	10.5475	0.00288318	0.183573	no	NISCH	PREDICTED: nischarin [Bos mutus]	-	-	-	-	GO:0005622//intracellular;GO:0044424//intracellular part;GO:0005737//cytoplasm;GO:0016020//membrane;GO:0005623//cell;GO:0044464//cell part;GO:0044444//cytoplasmic part	GO:0005543//phospholipid binding;GO:0005515//protein binding;GO:0005488//binding;GO:0008289//lipid binding	GO:0007165//signal transduction;GO:0006996//organelle organization;GO:0071840//cellular component organization or biogenesis;GO:0051674//localization of cell;GO:0016043//cellular component organization;GO:0044699//single-organism process;GO:0044700//single organism signaling;GO:0040011//locomotion;GO:0007010//cytoskeleton organization;GO:0051716//cellular response to stimulus;GO:0006928//movement…
XP_005894284	0	63.9833	0.001	1.49333	10.5443	0.000715595	0.0947217	no	LRRC41	leucine-rich repeat-containing protein 41 [Bos taurus]	-	-	-	-	-	-	-
XP_005909405	0	33.78	0.001	1.49333	10.5443	0.00332861	0.195222	no	PFKFB4	6-phosphofructo-2-kinase/fructose-2,6-bisphosphatase 4 [Bos taurus]	Metabolism;Environmental Information Processing	Carbohydrate metabolism;Signal transduction	ko04152//AMPK signaling pathway;ko00051//Fructose and mannose metabolism	K19030	GO:0044444//cytoplasmic part;GO:0044424//intracellular part;GO:0005622//intracellular;GO:0005623//cell;GO:0005737//cytoplasm;GO:0044464//cell part	GO:0097159//organic cyclic compound binding;GO:0036094//small molecule binding;GO:0005488//binding;GO:0016301//kinase activity;GO:0016772//transferase activity, transferring phosphorus-containing groups;GO:0050308//sugar-phosphatase activity;GO:0016788//hydrolase activity, acting on ester bonds;GO:0016773//phosphotransferase activity, alcohol group as acceptor;GO:0016787//hydrolase activity;GO:00…	GO:0044763//single-organism cellular process;GO:0055114//oxidation-reduction process;GO:0044723//single-organism carbohydrate metabolic process;GO:0006733//oxidoreduction coenzyme metabolic process;GO:0006725//cellular aromatic compound metabolic process;GO:0044238//primary metabolic process;GO:0006139//nucleobase-containing compound metabolic process;GO:0046483//heterocycle metabolic process;GO:…
XP_005890855	0	54.6867	0.001	1.49	10.5411	0.00880249	0.292396	no	SLC44A2	choline transporter-like protein 2 [Bos taurus]	-	-	-	-	GO:0005773//vacuole;GO:0005764//lysosome;GO:0044425//membrane part;GO:1903561//extracellular vesicle;GO:0043230//extracellular organelle;GO:0005737//cytoplasm;GO:0044424//intracellular part;GO:0031224//intrinsic component of membrane;GO:0005576//extracellular region;GO:0043227//membrane-bounded organelle;GO:0043226//organelle;GO:0044421//extracellular region part;GO:0000323//lytic vacuole;GO:0043…	-	GO:0050896//response to stimulus;GO:0035556//intracellular signal transduction;GO:0009987//cellular process;GO:0044699//single-organism process;GO:0065007//biological regulation;GO:0050794//regulation of cellular process;GO:0023052//signaling;GO:0044763//single-organism cellular process;GO:0044700//single organism signaling;GO:0051234//establishment of localization;GO:0050789//regulation of biolo…
XP_005906871	0	84.6033	0.001	1.48333	10.5346	0.00492054	0.23295	no	RBM44	PREDICTED: RNA-binding protein 44 [Bos mutus]	-	-	-	-	GO:0005576//extracellular region;GO:0044421//extracellular region part;GO:0005622//intracellular;GO:0044464//cell part;GO:0005623//cell;GO:0044424//intracellular part	GO:0005515//protein binding;GO:1901363//heterocyclic compound binding;GO:0036094//small molecule binding;GO:0097159//organic cyclic compound binding;GO:0005488//binding;GO:0046983//protein dimerization activity;GO:0003676//nucleic acid binding	-
XP_005902832	0	174.05	0.001	1.48	10.5314	7.32e-05	0.0258186	up	NUP214	PREDICTED: nuclear pore complex protein Nup214 [Bos mutus]	Genetic Information Processing	Translation	ko03013//RNA transport	K14317	GO:0043227//membrane-bounded organelle;GO:0005912//adherens junction;GO:0044464//cell part;GO:0005623//cell;GO:0043231//intracellular membrane-bounded organelle;GO:0030055//cell-substrate junction;GO:0043229//intracellular organelle;GO:0044424//intracellular part;GO:0070161//anchoring junction;GO:0005924//cell-substrate adherens junction;GO:0005622//intracellular;GO:0030054//cell junction;GO:0043…	-	GO:0045184//establishment of protein localization;GO:0015031//protein transport;GO:0046907//intracellular transport;GO:0006810//transport;GO:0070727//cellular macromolecule localization;GO:0015931//nucleobase-containing compound transport;GO:0051169//nuclear transport;GO:0051179//localization;GO:0051168//nuclear export;GO:0071702//organic substance transport;GO:0051236//establishment of RNA local…
XP_005891102	0	197.623	0.001	1.46667	10.5183	0.00142619	0.135769	no	NBAS	PREDICTED: neuroblastoma-amplified sequence [Bos mutus]	-	-	-	-	GO:0043227//membrane-bounded organelle;GO:0032991//macromolecular complex;GO:0005622//intracellular;GO:0042175//nuclear outer membrane-endoplasmic reticulum membrane network;GO:0016020//membrane;GO:0044464//cell part;GO:0044444//cytoplasmic part;GO:0043234//protein complex;GO:0005737//cytoplasm;GO:0044424//intracellular part;GO:0043231//intracellular membrane-bounded organelle;GO:0005623//cell;GO…	-	GO:0031329//regulation of cellular catabolic process;GO:0009894//regulation of catabolic process;GO:1902373//negative regulation of mRNA catabolic process;GO:0008104//protein localization;GO:0048193//Golgi vesicle transport;GO:0080090//regulation of primary metabolic process;GO:0031324//negative regulation of cellular metabolic process;GO:0016192//vesicle-mediated transport;GO:0051253//negative r…
XP_005905107	0	54.46	0.001	1.46667	10.5183	0.00889095	0.294404	no	FBXO34	PREDICTED: F-box only protein 34 [Bos mutus]	-	-	-	-	GO:0044464//cell part;GO:0044424//intracellular part;GO:0005622//intracellular;GO:0005623//cell	-	-
XP_005895425	0	10.2167	0.001	1.45667	10.5085	0.0201903	0.401891	no	SNRNP70	PREDICTED: U1 small nuclear ribonucleoprotein 70 kDa-like [Bos mutus]	Genetic Information Processing	Transcription	ko03040//Spliceosome	K11093	-	-	-
XP_014333608	0	10.2167	0.001	1.45667	10.5085	0.0201844	0.401891	no	SNRNP70	PREDICTED: U1 small nuclear ribonucleoprotein 70 kDa-like [Bos mutus]	Genetic Information Processing	Transcription	ko03040//Spliceosome	K11093	-	-	-
XP_005909926	0	39.65	0.001	1.43	10.4818	0.00217025	0.165525	no	RALGPS2	PREDICTED: ras-specific guanine nucleotide-releasing factor RalGPS2 isoform X2 [Ovis aries]	-	-	-	-	GO:0005622//intracellular;GO:0016020//membrane;GO:0005623//cell;GO:0044464//cell part;GO:0044424//intracellular part	-	GO:0032484//Ral protein signal transduction;GO:0043087//regulation of GTPase activity;GO:0050790//regulation of catalytic activity;GO:0044700//single organism signaling;GO:0009987//cellular process;GO:0007265//Ras protein signal transduction;GO:0050896//response to stimulus;GO:0044699//single-organism process;GO:0065007//biological regulation;GO:0065009//regulation of molecular function;GO:005078…
XP_014333816	0	16.72	0.001	1.43	10.4818	0.00877102	0.292013	no	GPALPP1	PREDICTED: GPALPP motifs-containing protein 1 isoform X2 [Bos taurus]	-	-	-	-	-	-	-
XM_005909300	0	64.6733	0.001	1.42	10.4717	8.49e-06	0.00524965	up	SORBS2	PREDICTED: Bos mutus sorbin and SH3 domain containing 2 (SORBS2), transcript variant X5, mRNA	-	-	-	-	GO:0030055//cell-substrate junction;GO:0005886//plasma membrane;GO:0005622//intracellular;GO:0005737//cytoplasm;GO:0044444//cytoplasmic part;GO:0030054//cell junction;GO:0031252//cell leading edge;GO:0070161//anchoring junction;GO:0044464//cell part;GO:0044424//intracellular part;GO:0005924//cell-substrate adherens junction;GO:0071944//cell periphery;GO:0005623//cell;GO:0005912//adherens junction…	-	-
XP_005895600	0	13.2467	0.001	1.42	10.4717	0.0173668	0.376383	no	TP53INP1	PREDICTED: tumor protein p53-inducible nuclear protein 1 isoform X1 [Bos mutus]	-	-	-	-	-	-	-
XP_005901758	0	74.49	0.001	1.41667	10.4683	0.00583078	0.252395	no	R3HDM2	PREDICTED: R3H domain-containing protein 2 isoform X2 [Bos mutus]	-	-	-	-	-	GO:0003723//RNA binding;GO:0003676//nucleic acid binding;GO:0005488//binding;GO:1901363//heterocyclic compound binding;GO:0097159//organic cyclic compound binding	-
XP_005910403	0	30.5	0.001	1.41667	10.4683	0.00360014	0.202123	no	MBOAT7	PREDICTED: lysophospholipid acyltransferase 7 [Bos mutus]	Metabolism	Lipid metabolism	ko00564//Glycerophospholipid metabolism	K13516	GO:0016020//membrane;GO:0042175//nuclear outer membrane-endoplasmic reticulum membrane network;GO:0031224//intrinsic component of membrane;GO:0044464//cell part;GO:0005623//cell;GO:0012505//endomembrane system;GO:0044425//membrane part	GO:0003824//catalytic activity;GO:0016740//transferase activity;GO:0016746//transferase activity, transferring acyl groups;GO:0008374//O-acyltransferase activity;GO:0016747//transferase activity, transferring acyl groups other than amino-acyl groups;GO:0016411//acylglycerol O-acyltransferase activity;GO:0005488//binding	GO:0046488//phosphatidylinositol metabolic process;GO:0071704//organic substance metabolic process;GO:0044707//single-multicellular organism process;GO:0032502//developmental process;GO:0032501//multicellular organismal process;GO:0007417//central nervous system development;GO:0044710//single-organism metabolic process;GO:0060322//head development;GO:0006793//phosphorus metabolic process;GO:00442…
XP_014339144	0	11.3767	0.001	1.41	10.4615	0.0234789	0.41995	no	LOC102264564	NICE-3 predicted containing protein [Cricetulus griseus]	-	-	-	-	GO:0016020//membrane;GO:0044425//membrane part;GO:0031224//intrinsic component of membrane	GO:0003824//catalytic activity	GO:0044699//single-organism process;GO:0008152//metabolic process;GO:0044710//single-organism metabolic process
XP_005893015	0	41.9	0.001	1.40667	10.4581	0.0127682	0.340595	no	YTHDF3	PREDICTED: YTH domain family protein 3 isoform X1 [Bos mutus]	-	-	-	-	-	GO:0003676//nucleic acid binding;GO:0005488//binding;GO:0003723//RNA binding;GO:0097159//organic cyclic compound binding;GO:1901363//heterocyclic compound binding	-
XP_005897749	0	20.8567	0.001	1.40333	10.4546	0.028927	0.453396	no	TWISTNB	PREDICTED: DNA-directed RNA polymerase I subunit RPA43 [Bos mutus]	Metabolism;Genetic Information Processing	Transcription;Nucleotide metabolism	ko00230//Purine metabolism;ko00240//Pyrimidine metabolism;ko03020//RNA polymerase	K03004	-	-	-
XP_005898724	0	32.2967	0.001	1.40333	10.4546	0.0176448	0.378359	no	SHC1	SHC-transforming protein 1 isoform a [Bos taurus]	Cellular Processes;Organismal Systems;Environmental Information Processing	Endocrine system;Immune system;Cellular commiunity;Signal transduction;Nervous system	ko04014//Ras signaling pathway;ko04510//Focal adhesion;ko04062//Chemokine signaling pathway;ko04910//Insulin signaling pathway;ko04722//Neurotrophin signaling pathway;ko04650//Natural killer cell mediated cytotoxicity;ko04915//Estrogen signaling pathway;ko04012//ErbB signaling pathway;ko04917//Prolactin signaling pathway	K06279	-	-	-
XM_005910130	0	25.1767	0.001	1.39667	10.4478	0.00479078	0.230492	no	RGS8	PREDICTED: Bos mutus regulator of G-protein signaling 8 (RGS8), transcript variant X1, mRNA	-	-	-	-	GO:0005623//cell;GO:0044297//cell body;GO:0043229//intracellular organelle;GO:0042995//cell projection;GO:0044464//cell part;GO:0043227//membrane-bounded organelle;GO:0098562//cytoplasmic side of membrane;GO:0043025//neuronal cell body;GO:0044459//plasma membrane part;GO:0005886//plasma membrane;GO:0044424//intracellular part;GO:0071944//cell periphery;GO:0098552//side of membrane;GO:0044425//mem…	GO:0030234//enzyme regulator activity;GO:0008047//enzyme activator activity;GO:0098772//molecular function regulator;GO:0005488//binding	GO:0051336//regulation of hydrolase activity;GO:0009987//cellular process;GO:0065007//biological regulation;GO:0007165//signal transduction;GO:0051716//cellular response to stimulus;GO:0044700//single organism signaling;GO:0044699//single-organism process;GO:0043087//regulation of GTPase activity;GO:0007212//dopamine receptor signaling pathway;GO:0050896//response to stimulus;GO:0023052//signalin…
XP_005901350	0	27.38	0.001	1.39667	10.4478	0.0168853	0.371575	no	BEST1	bestrophin-1 [Bos taurus]	-	-	-	-	GO:0071944//cell periphery;GO:0043234//protein complex;GO:0034702//ion channel complex;GO:0031224//intrinsic component of membrane;GO:0044464//cell part;GO:1902495//transmembrane transporter complex;GO:0098796//membrane protein complex;GO:1990351//transporter complex;GO:0005623//cell;GO:0016021//integral component of membrane;GO:0016020//membrane;GO:0032991//macromolecular complex;GO:0044425//mem…	-	GO:0006816//calcium ion transport;GO:0006812//cation transport;GO:0072511//divalent inorganic cation transport;GO:0032501//multicellular organismal process;GO:0050953//sensory perception of light stimulus;GO:0006821//chloride transport;GO:0030001//metal ion transport;GO:0015698//inorganic anion transport;GO:0070838//divalent metal ion transport;GO:0006811//ion transport;GO:0007601//visual percept…
XP_014332879	0	92.33	0.001	1.38667	10.4374	0.00432635	0.221394	no	STAG3	cohesin subunit SA-3 [Bos taurus]	Cellular Processes	Cell growth and death	ko04114//Oocyte meiosis	K13055	GO:0043227//membrane-bounded organelle;GO:0000794//condensed nuclear chromosome;GO:0044422//organelle part;GO:0005623//cell;GO:0005634//nucleus;GO:0031974//membrane-enclosed lumen;GO:0008278//cohesin complex;GO:0044464//cell part;GO:0000798//nuclear cohesin complex;GO:0044427//chromosomal part;GO:0005694//chromosome;GO:0000793//condensed chromosome;GO:0005622//intracellular;GO:0043234//protein co…	-	GO:0008104//protein localization;GO:0051321//meiotic cell cycle;GO:0006996//organelle organization;GO:0022402//cell cycle process;GO:1903046//meiotic cell cycle process;GO:0071840//cellular component organization or biogenesis;GO:0016043//cellular component organization;GO:0044702//single organism reproductive process;GO:0034613//cellular protein localization;GO:0051179//localization;GO:0033036//…
XM_005906275	0	42.3067	0.001	1.38333	10.4339	0.000103634	0.0328071	up	FAM133B	PREDICTED: Bos mutus family with sequence similarity 133, member B (FAM133B), transcript variant X2, mRNA	-	-	-	-	-	-	-
XM_005908751	0	19.29	0.001	1.38	10.4305	0.0255132	0.431459	no	PUS3	PREDICTED: Bos mutus pseudouridylate synthase 3 (PUS3), transcript variant X3, mRNA	-	-	-	-	GO:0043231//intracellular membrane-bounded organelle;GO:0043229//intracellular organelle;GO:0005622//intracellular;GO:0043227//membrane-bounded organelle;GO:0005623//cell;GO:0044424//intracellular part;GO:0044464//cell part;GO:0043226//organelle	GO:0016853//isomerase activity;GO:0097159//organic cyclic compound binding;GO:0003676//nucleic acid binding;GO:0016866//intramolecular transferase activity;GO:0003824//catalytic activity;GO:0005488//binding;GO:1901363//heterocyclic compound binding	GO:0006399//tRNA metabolic process;GO:0034641//cellular nitrogen compound metabolic process;GO:0006725//cellular aromatic compound metabolic process;GO:0043412//macromolecule modification;GO:0008152//metabolic process;GO:0046483//heterocycle metabolic process;GO:0009987//cellular process;GO:0044238//primary metabolic process;GO:0006807//nitrogen compound metabolic process;GO:0090304//nucleic acid…
XP_014331873	0	73.33	0.001	1.38	10.4305	0.00594076	0.254564	no	BNC1	PREDICTED: zinc finger protein basonuclin-1 [Bison bison bison]	-	-	-	-	GO:0043227//membrane-bounded organelle;GO:0005623//cell;GO:0043229//intracellular organelle;GO:0044464//cell part;GO:0043231//intracellular membrane-bounded organelle;GO:0044424//intracellular part;GO:0005622//intracellular;GO:0043226//organelle	GO:0005488//binding;GO:1901363//heterocyclic compound binding;GO:0003676//nucleic acid binding;GO:0001071//nucleic acid binding transcription factor activity;GO:0097159//organic cyclic compound binding	GO:0032774//RNA biosynthetic process;GO:0006807//nitrogen compound metabolic process;GO:0010467//gene expression;GO:0019438//aromatic compound biosynthetic process;GO:1901576//organic substance biosynthetic process;GO:0018130//heterocycle biosynthetic process;GO:0009058//biosynthetic process;GO:0043170//macromolecule metabolic process;GO:0034641//cellular nitrogen compound metabolic process;GO:00…
XP_005909763	0	55.7333	0.001	1.37333	10.4235	0.000979979	0.11138	no	CASD1	PREDICTED: CAS1 domain-containing protein 1 [Bos mutus]	-	-	-	-	GO:0044425//membrane part;GO:0031224//intrinsic component of membrane;GO:0016020//membrane	-	-
XP_014335629	0	5.86667	0.001	1.37	10.42	0.0463166	0.53294	no	LOC102270612	PREDICTED: malignant T-cell-amplified sequence 1-like [Ovis aries]	-	-	-	-	GO:0043232//intracellular non-membrane-bounded organelle;GO:0044424//intracellular part;GO:0044446//intracellular organelle part;GO:0043226//organelle;GO:0043229//intracellular organelle;GO:1990904//ribonucleoprotein complex;GO:0044391//ribosomal subunit;GO:0044422//organelle part;GO:0005737//cytoplasm;GO:0005840//ribosome;GO:0030529//intracellular ribonucleoprotein complex;GO:0043228//non-membra…	GO:0003676//nucleic acid binding;GO:0005488//binding;GO:0003723//RNA binding;GO:0097159//organic cyclic compound binding;GO:0008135//translation factor activity, RNA binding;GO:1901363//heterocyclic compound binding	GO:0043603//cellular amide metabolic process;GO:0016070//RNA metabolic process;GO:0006725//cellular aromatic compound metabolic process;GO:0034654//nucleobase-containing compound biosynthetic process;GO:0071826//ribonucleoprotein complex subunit organization;GO:0006412//translation;GO:0006950//response to stress;GO:0009058//biosynthetic process;GO:0034645//cellular macromolecule biosynthetic proc…
XP_005895810	0	32.7	0.001	1.36	10.4094	0.0174553	0.377118	no	ZNF512	zinc finger protein 512 [Bos taurus]	-	-	-	-	GO:0005623//cell;GO:0043226//organelle;GO:0043229//intracellular organelle;GO:0044464//cell part;GO:0043231//intracellular membrane-bounded organelle;GO:0043227//membrane-bounded organelle;GO:0044424//intracellular part;GO:0005622//intracellular	GO:0043167//ion binding;GO:0043169//cation binding;GO:0005488//binding	GO:0044260//cellular macromolecule metabolic process;GO:0097659//nucleic acid-templated transcription;GO:0009058//biosynthetic process;GO:0009059//macromolecule biosynthetic process;GO:0019438//aromatic compound biosynthetic process;GO:0016070//RNA metabolic process;GO:0006139//nucleobase-containing compound metabolic process;GO:0044249//cellular biosynthetic process;GO:1901360//organic cyclic co…
XP_014333786	0	36.85	0.001	1.36	10.4094	0.0113803	0.325347	no	CCHCR1	PREDICTED: coiled-coil alpha-helical rod protein 1 [Bos mutus]	-	-	-	-	GO:0043228//non-membrane-bounded organelle;GO:0044424//intracellular part;GO:0044430//cytoskeletal part;GO:0005622//intracellular;GO:0043232//intracellular non-membrane-bounded organelle;GO:0043229//intracellular organelle;GO:0044422//organelle part;GO:0043226//organelle;GO:0005815//microtubule organizing center;GO:0005813//centrosome;GO:0044464//cell part;GO:0005856//cytoskeleton;GO:0044446//int…	-	GO:0033036//macromolecule localization;GO:0071702//organic substance transport;GO:0044699//single-organism process;GO:0046907//intracellular transport;GO:0034613//cellular protein localization;GO:0051641//cellular localization;GO:0044767//single-organism developmental process;GO:0032502//developmental process;GO:0015031//protein transport;GO:0044763//single-organism cellular process;GO:0051234//e…
XP_005904449	0	303.637	0.001	1.34667	10.3952	7.08e-09	1.77e-05	up	VPS13B	PREDICTED: LOW QUALITY PROTEIN: vacuolar protein sorting-associated protein 13B [Bos mutus]	-	-	-	-	-	-	-
XP_014336176	0	142.713	0.001	1.33667	10.3844	0.00231894	0.168226	no	BAZ2A	Bromodomain adjacent to zinc finger domain protein 2A, partial [Bos mutus]	-	-	-	-	GO:0044424//intracellular part;GO:0043226//organelle;GO:0043227//membrane-bounded organelle;GO:0005622//intracellular;GO:0005623//cell;GO:0044446//intracellular organelle part;GO:0044422//organelle part;GO:0031981//nuclear lumen;GO:0031974//membrane-enclosed lumen;GO:0043231//intracellular membrane-bounded organelle;GO:0043229//intracellular organelle;GO:0044428//nuclear part;GO:0043233//organell…	GO:0097159//organic cyclic compound binding;GO:0043167//ion binding;GO:0003676//nucleic acid binding;GO:0005515//protein binding;GO:0046872//metal ion binding;GO:0043169//cation binding;GO:0005488//binding;GO:1901363//heterocyclic compound binding;GO:0046914//transition metal ion binding	-
XP_005898911	0	24.92	0.001	1.32333	10.37	0.000408376	0.0705927	no	LCOR	PREDICTED: ligand-dependent corepressor isoform X5 [Bos taurus]	-	-	-	-	-	-	-
XP_014335885	0	12.01	0.001	1.32	10.3663	0.0156122	0.364395	no	PITPNA	PREDICTED: phosphatidylinositol transfer protein alpha isoform isoform X1 [Bos taurus]	-	-	-	-	GO:1903561//extracellular vesicle;GO:0044424//intracellular part;GO:0043230//extracellular organelle;GO:0031982//vesicle;GO:0005576//extracellular region;GO:0005623//cell;GO:0005622//intracellular;GO:0044421//extracellular region part;GO:0043226//organelle;GO:0043227//membrane-bounded organelle;GO:0044464//cell part	GO:0005319//lipid transporter activity;GO:0022892//substrate-specific transporter activity;GO:0005548//phospholipid transporter activity;GO:0005215//transporter activity;GO:0005488//binding	GO:0044238//primary metabolic process;GO:0050877//neurological system process;GO:0006869//lipid transport;GO:0003008//system process;GO:0044699//single-organism process;GO:0071702//organic substance transport;GO:0044765//single-organism transport;GO:0051179//localization;GO:0050953//sensory perception of light stimulus;GO:1902578//single-organism localization;GO:0006810//transport;GO:0033036//mac…
XP_005887217	0.316667	375.777	0.00333333	4.37333	10.3576	4.47e-11	2.61e-07	up	IQGAP1	PREDICTED: ras GTPase-activating-like protein IQGAP1 isoform X2 [Bos mutus]	Cellular Processes	Cellular commiunity;Cell motility	ko04810//Regulation of actin cytoskeleton;ko04520//Adherens junction	K16848	GO:0070161//anchoring junction;GO:0044464//cell part;GO:0043230//extracellular organelle;GO:0005622//intracellular;GO:0098562//cytoplasmic side of membrane;GO:0043227//membrane-bounded organelle;GO:0005576//extracellular region;GO:0005912//adherens junction;GO:0044459//plasma membrane part;GO:0005737//cytoplasm;GO:0044424//intracellular part;GO:1903561//extracellular vesicle;GO:0042995//cell proj…	GO:0035091//phosphatidylinositol binding;GO:0019209//kinase activator activity;GO:0019902//phosphatase binding;GO:0031267//small GTPase binding;GO:0019899//enzyme binding;GO:0019900//kinase binding;GO:0030295//protein kinase activator activity;GO:0008047//enzyme activator activity;GO:0030234//enzyme regulator activity;GO:0008289//lipid binding;GO:0005543//phospholipid binding;GO:0051020//GTPase b…	GO:0050896//response to stimulus;GO:0070887//cellular response to chemical stimulus;GO:0010604//positive regulation of macromolecule metabolic process;GO:0072311//glomerular epithelial cell differentiation;GO:0072112//glomerular visceral epithelial cell differentiation;GO:0044707//single-multicellular organism process;GO:0045937//positive regulation of phosphate metabolic process;GO:0051338//regu…
XP_005900992	0	17.0767	0.001	1.31	10.3554	0.0373515	0.498752	no	SAE1	PREDICTED: SUMO-activating enzyme subunit 1 isoform X2 [Bos mutus]	Genetic Information Processing	Folding, sorting and degradation	ko04120//Ubiquitin mediated proteolysis	K10684	-	-	-
XM_014477452	0	8.69333	0.001	1.30667	10.3517	0.0238556	0.422661	no	KCNE2	PREDICTED: Bos mutus potassium channel, voltage gated subfamily E regulatory beta subunit 2 (KCNE2), transcript variant X3, mRNA	Organismal Systems	Digestive system	ko04971//Gastric acid secretion	K04896	GO:0043226//organelle;GO:0005622//intracellular;GO:0031224//intrinsic component of membrane;GO:0044464//cell part;GO:0031226//intrinsic component of plasma membrane;GO:0005887//integral component of plasma membrane;GO:0005623//cell;GO:0016020//membrane;GO:0005737//cytoplasm;GO:0044459//plasma membrane part;GO:0043229//intracellular organelle;GO:0044424//intracellular part;GO:0043231//intracellula…	GO:0022803//passive transmembrane transporter activity;GO:0022891//substrate-specific transmembrane transporter activity;GO:0005216//ion channel activity;GO:0008324//cation transmembrane transporter activity;GO:0015077//monovalent inorganic cation transmembrane transporter activity;GO:0022836//gated channel activity;GO:0022838//substrate-specific channel activity;GO:0022857//transmembrane transpo…	GO:0099623//regulation of cardiac muscle cell membrane repolarization;GO:0006928//movement of cell or subcellular component;GO:0032268//regulation of cellular protein metabolic process;GO:0086005//ventricular cardiac muscle cell action potential;GO:0060048//cardiac muscle contraction;GO:0006941//striated muscle contraction;GO:0060306//regulation of membrane repolarization;GO:0051049//regulation o…
XP_005890837	0	26.5367	0.001	1.30667	10.3517	0.0220503	0.411837	no	PLPPR2	PREDICTED: lipid phosphate phosphatase-related protein type 2-like isoform X1 [Bos mutus]	-	-	-	-	-	GO:0016788//hydrolase activity, acting on ester bonds;GO:0016787//hydrolase activity;GO:0042578//phosphoric ester hydrolase activity;GO:0016791//phosphatase activity;GO:0003824//catalytic activity	GO:0009987//cellular process;GO:0044763//single-organism cellular process;GO:0044699//single-organism process
XP_005887069	0	58.2567	0.001	1.30333	10.348	0.00813071	0.28256	no	RNF19A	PREDICTED: LOW QUALITY PROTEIN: E3 ubiquitin-protein ligase RNF19A [Bos mutus]	-	-	-	-	-	-	-
XP_005907329	0	20.6633	0.001	1.30333	10.348	0.00594527	0.254564	no	LOC102282680	PREDICTED: nucleolar complex protein 3 homolog, partial [Bos mutus]	-	-	-	-	-	-	-
XP_005909261	0	15.6133	0.001	1.29667	10.3406	0.0102097	0.310666	no	NIT1	PREDICTED: nitrilase homolog 1 isoform X1 [Bos mutus]	-	-	-	-	GO:0043230//extracellular organelle;GO:0043226//organelle;GO:1903561//extracellular vesicle;GO:0043229//intracellular organelle;GO:0044424//intracellular part;GO:0005623//cell;GO:0043227//membrane-bounded organelle;GO:0044421//extracellular region part;GO:0005576//extracellular region;GO:0005622//intracellular;GO:0044464//cell part;GO:0031982//vesicle;GO:0043231//intracellular membrane-bounded or…	GO:0016787//hydrolase activity;GO:0003824//catalytic activity	GO:0008152//metabolic process
Unigene010721	0	7	0.001	1.29333	10.3369	0.0396575	0.508252	no	-	-	-	-	-	-	-	-	-
XP_005887610	0	11.46	0.001	1.29333	10.3369	0.0033629	0.195813	no	PSMA1	PREDICTED: proteasome subunit alpha type-1 isoform X1 [Bos mutus]	Genetic Information Processing	Folding, sorting and degradation	ko03050//Proteasome	K02725	GO:0044446//intracellular organelle part;GO:0000502//proteasome complex;GO:0031982//vesicle;GO:0070013//intracellular organelle lumen;GO:0005634//nucleus;GO:0043230//extracellular organelle;GO:0043229//intracellular organelle;GO:0043227//membrane-bounded organelle;GO:0015630//microtubule cytoskeleton;GO:0005622//intracellular;GO:0043226//organelle;GO:0005576//extracellular region;GO:0031981//nucl…	GO:0097159//organic cyclic compound binding;GO:0004175//endopeptidase activity;GO:0005488//binding;GO:1901363//heterocyclic compound binding;GO:0070011//peptidase activity, acting on L-amino acid peptides;GO:0008233//peptidase activity;GO:0016787//hydrolase activity;GO:0003676//nucleic acid binding;GO:0003824//catalytic activity;GO:0008289//lipid binding	GO:0043412//macromolecule modification;GO:0019752//carboxylic acid metabolic process;GO:0009987//cellular process;GO:0043161//proteasome-mediated ubiquitin-dependent protein catabolic process;GO:0030111//regulation of Wnt signaling pathway;GO:0008152//metabolic process;GO:0009968//negative regulation of signal transduction;GO:0010468//regulation of gene expression;GO:0010033//response to organic …
XP_014334936	0	31.86	0.001	1.29	10.3332	0.0178872	0.381019	no	PTBP2	PREDICTED: polypyrimidine tract-binding protein 2 isoform X2 [Bison bison bison]	-	-	-	-	GO:0044464//cell part;GO:0005622//intracellular;GO:0043226//organelle;GO:0030529//intracellular ribonucleoprotein complex;GO:0044424//intracellular part;GO:0032991//macromolecular complex;GO:0036477//somatodendritic compartment;GO:0097458//neuron part;GO:0043005//neuron projection;GO:0042995//cell projection;GO:1990904//ribonucleoprotein complex;GO:0005623//cell;GO:0043227//membrane-bounded organ…	GO:0097159//organic cyclic compound binding;GO:1901363//heterocyclic compound binding;GO:0003676//nucleic acid binding;GO:0044822//poly(A) RNA binding;GO:0003723//RNA binding;GO:0005488//binding	GO:0007420//brain development;GO:0048513//animal organ development;GO:0006396//RNA processing;GO:0044699//single-organism process;GO:0008380//RNA splicing;GO:0044085//cellular component biogenesis;GO:0030902//hindbrain development;GO:0000377//RNA splicing, via transesterification reactions with bulged adenosine as nucleophile;GO:0034641//cellular nitrogen compound metabolic process;GO:0016071//mR…
XP_005894699	0	91.4067	0.001	1.28667	10.3294	0.00441916	0.224	no	PCF11	PREDICTED: LOW QUALITY PROTEIN: pre-mRNA cleavage complex 2 protein Pcf11 [Bos mutus]	Genetic Information Processing	Translation	ko03015//mRNA surveillance pathway	K14400	-	-	GO:0034641//cellular nitrogen compound metabolic process;GO:0046483//heterocycle metabolic process;GO:0044237//cellular metabolic process;GO:0090304//nucleic acid metabolic process;GO:0006725//cellular aromatic compound metabolic process;GO:0009987//cellular process;GO:0016070//RNA metabolic process;GO:0006807//nitrogen compound metabolic process;GO:0044238//primary metabolic process;GO:0044260//…
XP_005894859	0	6.72333	0.001	1.28667	10.3294	0.0413998	0.516473	no	SAT2	diamine acetyltransferase 2 [Bos taurus]	Metabolism	Amino acid metabolism	ko00330//Arginine and proline metabolism	K00657	GO:0005622//intracellular;GO:0044421//extracellular region part;GO:0031982//vesicle;GO:0043230//extracellular organelle;GO:0044464//cell part;GO:0005623//cell;GO:0005576//extracellular region;GO:0043226//organelle;GO:0043227//membrane-bounded organelle;GO:0044424//intracellular part;GO:1903561//extracellular vesicle	GO:0016407//acetyltransferase activity;GO:0016746//transferase activity, transferring acyl groups;GO:0016747//transferase activity, transferring acyl groups other than amino-acyl groups;GO:0003824//catalytic activity;GO:0016740//transferase activity	GO:0006598//polyamine catabolic process;GO:0009308//amine metabolic process;GO:0034641//cellular nitrogen compound metabolic process;GO:0042402//cellular biogenic amine catabolic process;GO:0008152//metabolic process;GO:0006807//nitrogen compound metabolic process;GO:0008216//spermidine metabolic process;GO:1901564//organonitrogen compound metabolic process;GO:0071704//organic substance metabolic…
XP_005899442	0	31.9	0.001	1.28667	10.3294	0.0178849	0.381019	no	ANXA11	PREDICTED: annexin A11 [Bos mutus]	-	-	-	-	GO:0044464//cell part;GO:0031410//cytoplasmic vesicle;GO:0044428//nuclear part;GO:0005634//nucleus;GO:0043227//membrane-bounded organelle;GO:0030139//endocytic vesicle;GO:1903561//extracellular vesicle;GO:0005773//vacuole;GO:0043229//intracellular organelle;GO:0016023//cytoplasmic, membrane-bounded vesicle;GO:0043233//organelle lumen;GO:0005737//cytoplasm;GO:0044422//organelle part;GO:0012505//en…	GO:0003676//nucleic acid binding;GO:0043169//cation binding;GO:0008289//lipid binding;GO:0097159//organic cyclic compound binding;GO:0023023//MHC protein complex binding;GO:0044877//macromolecular complex binding;GO:1901363//heterocyclic compound binding;GO:0003823//antigen binding;GO:0046872//metal ion binding;GO:0005515//protein binding;GO:0043167//ion binding;GO:0003723//RNA binding;GO:0005488…	GO:0044699//single-organism process;GO:0016192//vesicle-mediated transport;GO:0010038//response to metal ion;GO:0051234//establishment of localization;GO:0010035//response to inorganic substance;GO:0051179//localization;GO:0009987//cellular process;GO:0050896//response to stimulus;GO:0044763//single-organism cellular process;GO:0042221//response to chemical;GO:0006897//endocytosis;GO:0006810//tra…
XP_005901047	0	102.637	0.001	1.28667	10.3294	0.00368788	0.203998	no	MLH3	PREDICTED: LOW QUALITY PROTEIN: DNA mismatch repair protein Mlh3 [Bos mutus]	Genetic Information Processing	Replication and repair	ko03430//Mismatch repair	K08739	-	-	-
XP_005887851	0	59.4767	0.001	1.27667	10.3182	0.00792387	0.279088	no	PPFIBP2	PREDICTED: liprin-beta-2 [Bos mutus]	-	-	-	-	-	-	-
XP_005892441	0	62.9133	0.001	1.27667	10.3182	1.55e-05	0.00831126	up	CBLB	PREDICTED: E3 ubiquitin-protein ligase CBL-B isoform X1 [Bos mutus]	Cellular Processes;Organismal Systems;Genetic Information Processing;Environmental Information Processing	Transport and catabolism;Signal transduction;Folding, sorting and degradation;Endocrine system;Immune system	ko04144//Endocytosis;ko04120//Ubiquitin mediated proteolysis;ko04630//Jak-STAT signaling pathway;ko04910//Insulin signaling pathway;ko04660//T cell receptor signaling pathway;ko04012//ErbB signaling pathway	K04707	GO:0005634//nucleus;GO:0043226//organelle;GO:0044446//intracellular organelle part;GO:0044428//nuclear part;GO:0005623//cell;GO:0044464//cell part;GO:0043227//membrane-bounded organelle;GO:0043229//intracellular organelle;GO:0043231//intracellular membrane-bounded organelle;GO:0005622//intracellular;GO:0043233//organelle lumen;GO:0031981//nuclear lumen;GO:0044422//organelle part;GO:0044424//intra…	GO:0043167//ion binding;GO:0005488//binding;GO:0043169//cation binding;GO:0019787//ubiquitin-like protein transferase activity;GO:0046914//transition metal ion binding;GO:0016740//transferase activity;GO:0003824//catalytic activity;GO:0046872//metal ion binding	GO:0032446//protein modification by small protein conjugation;GO:0008152//metabolic process;GO:0044763//single-organism cellular process;GO:0044267//cellular protein metabolic process;GO:0007154//cell communication;GO:0050789//regulation of biological process;GO:0023052//signaling;GO:0044699//single-organism process;GO:0050896//response to stimulus;GO:0070647//protein modification by small protei…
XP_005889007	0.00333333	6.41	0.001	1.27333	10.3144	0.0431494	0.521265	no	LOC102276966	coiled-coil domain containing 32 [Macaca mulatta]	-	-	-	-	-	-	-
XP_014338492	0.00333333	6.41	0.001	1.27333	10.3144	0.0431386	0.521254	no	LOC102276966	coiled-coil domain containing 32 [Macaca mulatta]	-	-	-	-	-	-	-
XP_005910301	0	41.39	0.001	1.27	10.3106	0.0130401	0.343659	no	FBXL5	PREDICTED: F-box/LRR-repeat protein 5 isoform X2 [Bison bison bison]	-	-	-	-	GO:0044424//intracellular part;GO:1990234//transferase complex;GO:0043234//protein complex;GO:0005737//cytoplasm;GO:0044464//cell part;GO:0000151//ubiquitin ligase complex;GO:0005622//intracellular;GO:0032991//macromolecular complex;GO:0031461//cullin-RING ubiquitin ligase complex;GO:0005623//cell;GO:0044444//cytoplasmic part;GO:1902494//catalytic complex	GO:0043169//cation binding;GO:0005488//binding;GO:0043167//ion binding;GO:0046914//transition metal ion binding;GO:0046872//metal ion binding	GO:0019538//protein metabolic process;GO:0050789//regulation of biological process;GO:0055076//transition metal ion homeostasis;GO:0055080//cation homeostasis;GO:0044267//cellular protein metabolic process;GO:0070647//protein modification by small protein conjugation or removal;GO:0050801//ion homeostasis;GO:0019941//modification-dependent protein catabolic process;GO:0065008//regulation of biolo…
XP_005891130	0	88.7367	0.001	1.26667	10.3068	0.00459506	0.227676	no	ULK4	PREDICTED: serine/threonine-protein kinase ULK4 [Bos mutus]	-	-	-	-	-	GO:0016301//kinase activity;GO:0005488//binding;GO:0032549//ribonucleoside binding;GO:0003824//catalytic activity;GO:0097159//organic cyclic compound binding;GO:0001882//nucleoside binding;GO:0097367//carbohydrate derivative binding;GO:0001883//purine nucleoside binding;GO:0016772//transferase activity, transferring phosphorus-containing groups;GO:0032550//purine ribonucleoside binding;GO:0016740…	GO:0023051//regulation of signaling;GO:0043170//macromolecule metabolic process;GO:0030154//cell differentiation;GO:0007254//JNK cascade;GO:0023052//signaling;GO:0048856//anatomical structure development;GO:0001932//regulation of protein phosphorylation;GO:0051403//stress-activated MAPK cascade;GO:0032268//regulation of cellular protein metabolic process;GO:0031098//stress-activated protein kinas…
XP_014334904	0	35.17	0.001	1.26667	10.3068	0.00324712	0.192661	no	TTC26	PREDICTED: tetratricopeptide repeat protein 26 isoform X2 [Bos taurus]	-	-	-	-	GO:0044424//intracellular part;GO:0005622//intracellular;GO:0005929//cilium;GO:0005623//cell;GO:0044464//cell part;GO:0043226//organelle;GO:0015630//microtubule cytoskeleton;GO:0043229//intracellular organelle;GO:0030990//intraciliary transport particle;GO:0005815//microtubule organizing center;GO:0044422//organelle part;GO:0044430//cytoskeletal part;GO:0044446//intracellular organelle part;GO:00…	-	GO:0023052//signaling;GO:0044699//single-organism process;GO:0033036//macromolecule localization;GO:0000003//reproduction;GO:0048646//anatomical structure formation involved in morphogenesis;GO:0044700//single organism signaling;GO:0071840//cellular component organization or biogenesis;GO:0044703//multi-organism reproductive process;GO:0010927//cellular component assembly involved in morphogenesi…
XM_014483098	0	22.7267	0.001	1.26	10.2992	0.000714775	0.0947217	no	LOC102280754	PREDICTED: Bos mutus high affinity immunoglobulin gamma Fc receptor I (LOC102280754), transcript variant X1, mRNA	Cellular Processes;Organismal Systems	Development;Transport and catabolism;Immune system	ko04145//Phagosome;ko04380//Osteoclast differentiation;ko04666//Fc gamma R-mediated phagocytosis;ko04640//Hematopoietic cell lineage	K06498	GO:0044425//membrane part;GO:0044464//cell part;GO:0031224//intrinsic component of membrane;GO:0016020//membrane;GO:0071944//cell periphery;GO:0005623//cell;GO:0005886//plasma membrane	GO:0004871//signal transducer activity;GO:0038023//signaling receptor activity;GO:0032403//protein complex binding;GO:0004872//receptor activity;GO:0099600//transmembrane receptor activity;GO:0019763//immunoglobulin receptor activity;GO:0044877//macromolecular complex binding;GO:0060089//molecular transducer activity;GO:0005488//binding;GO:0004888//transmembrane signaling receptor activity;GO:000…	GO:0051704//multi-organism process;GO:0001794//type IIa hypersensitivity;GO:0002376//immune system process;GO:0050794//regulation of cellular process;GO:0065007//biological regulation;GO:0038093//Fc receptor signaling pathway;GO:0016064//immunoglobulin mediated immune response;GO:0043207//response to external biotic stimulus;GO:0006909//phagocytosis;GO:0002444//myeloid leukocyte mediated immunity…
XP_005908083	0	85.42	0.001	1.25667	10.2954	0.00486065	0.231471	no	UBE2O	PREDICTED: ubiquitin-conjugating enzyme E2 O [Bos mutus]	Genetic Information Processing	Folding, sorting and degradation	ko04120//Ubiquitin mediated proteolysis	K10581	-	-	-
XP_005910078	0	12.3067	0.001	1.25667	10.2954	0.018602	0.387449	no	CHTOP	chromatin target of PRMT1 protein [Bos taurus]	-	-	-	-	GO:0005623//cell;GO:0070013//intracellular organelle lumen;GO:0043227//membrane-bounded organelle;GO:0043231//intracellular membrane-bounded organelle;GO:0044422//organelle part;GO:0044446//intracellular organelle part;GO:0044428//nuclear part;GO:0043226//organelle;GO:0044464//cell part;GO:0044451//nucleoplasm part;GO:0016604//nuclear body;GO:0031974//membrane-enclosed lumen;GO:0043229//intracell…	GO:0003676//nucleic acid binding;GO:0005488//binding;GO:0000166//nucleotide binding;GO:1901265//nucleoside phosphate binding;GO:0097159//organic cyclic compound binding;GO:0036094//small molecule binding;GO:0003723//RNA binding;GO:1901363//heterocyclic compound binding	GO:0006139//nucleobase-containing compound metabolic process;GO:0006405//RNA export from nucleus;GO:0016569//chromatin modification;GO:0044267//cellular protein metabolic process;GO:0043170//macromolecule metabolic process;GO:0071704//organic substance metabolic process;GO:0034641//cellular nitrogen compound metabolic process;GO:0090304//nucleic acid metabolic process;GO:0051179//localization;GO:…
XP_014336967	0	19.5533	0.001	1.25667	10.2954	0.0312622	0.468971	no	CDK2	PREDICTED: cyclin-dependent kinase 2 isoform X1 [Pantholops hodgsonii]	Environmental Information Processing;Cellular Processes;Organismal Systems	Signal transduction;Cell growth and death;Endocrine system	ko04151//PI3K-Akt signaling pathway;ko04068//FoxO signaling pathway;ko04114//Oocyte meiosis;ko04110//Cell cycle;ko04914//Progesterone-mediated oocyte maturation;ko04115//p53 signaling pathway	K02206	GO:0044427//chromosomal part;GO:0005654//nucleoplasm;GO:0031981//nuclear lumen;GO:0016604//nuclear body;GO:0044424//intracellular part;GO:0044428//nuclear part;GO:0043226//organelle;GO:0043227//membrane-bounded organelle;GO:0043232//intracellular non-membrane-bounded organelle;GO:0070013//intracellular organelle lumen;GO:0005694//chromosome;GO:0043234//protein complex;GO:0015630//microtubule cyto…	GO:0043167//ion binding;GO:0097159//organic cyclic compound binding;GO:0003824//catalytic activity;GO:0016773//phosphotransferase activity, alcohol group as acceptor;GO:0036094//small molecule binding;GO:0016301//kinase activity;GO:0001883//purine nucleoside binding;GO:0032549//ribonucleoside binding;GO:1901363//heterocyclic compound binding;GO:0097367//carbohydrate derivative binding;GO:0004674/…	GO:0071840//cellular component organization or biogenesis;GO:0043933//macromolecular complex subunit organization;GO:0009725//response to hormone;GO:0006725//cellular aromatic compound metabolic process;GO:0048519//negative regulation of biological process;GO:0006260//DNA replication;GO:0009894//regulation of catabolic process;GO:0030162//regulation of proteolysis;GO:0006812//cation transport;GO:…
XM_005902113	0	43.9967	0.001	1.25333	10.2916	6.99e-05	0.0255037	up	ATF7	PREDICTED: Bos mutus activating transcription factor 7 (ATF7), transcript variant X3, mRNA	-	-	-	-	GO:0005622//intracellular;GO:0043233//organelle lumen;GO:0043229//intracellular organelle;GO:0044424//intracellular part;GO:0070013//intracellular organelle lumen;GO:0043227//membrane-bounded organelle;GO:0044428//nuclear part;GO:0044464//cell part;GO:0043226//organelle;GO:0005623//cell;GO:0044446//intracellular organelle part;GO:0044422//organelle part;GO:0043231//intracellular membrane-bounded …	GO:0019900//kinase binding;GO:1901363//heterocyclic compound binding;GO:0019899//enzyme binding;GO:0001067//regulatory region nucleic acid binding;GO:0043167//ion binding;GO:0003677//DNA binding;GO:0003700//transcription factor activity, sequence-specific DNA binding;GO:0019901//protein kinase binding;GO:0097159//organic cyclic compound binding;GO:0003676//nucleic acid binding;GO:0005488//binding…	GO:0044260//cellular macromolecule metabolic process;GO:1901362//organic cyclic compound biosynthetic process;GO:0044403//symbiosis, encompassing mutualism through parasitism;GO:0044238//primary metabolic process;GO:0044237//cellular metabolic process;GO:0097659//nucleic acid-templated transcription;GO:0006351//transcription, DNA-templated;GO:0071704//organic substance metabolic process;GO:003465…
XP_005886754	0	79.2633	0.001	1.25333	10.2916	0.0053352	0.243121	no	JAK1	tyrosine-protein kinase JAK1 [Bos taurus]	Environmental Information Processing;Cellular Processes;Organismal Systems	Signal transduction;Cellular commiunity;Development	ko04151//PI3K-Akt signaling pathway;ko04550//Signaling pathways regulating pluripotency of stem cells;ko04630//Jak-STAT signaling pathway;ko04380//Osteoclast differentiation	K11217	-	-	-
XP_005902301	0	48.21	0.001	1.24333	10.28	0.0103771	0.312401	no	LOC102268359	PREDICTED: melanoma-associated antigen D4-like isoform X3 [Bos mutus]	-	-	-	-	-	-	-
XP_005902302	0	48.21	0.001	1.24333	10.28	0.0103719	0.312401	no	LOC102268359	PREDICTED: melanoma-associated antigen D4-like isoform X3 [Bos mutus]	-	-	-	-	-	-	-
XP_005903078	0	23.35	0.001	1.24	10.2761	0.00586902	0.253424	no	B4GALT1	PREDICTED: LOW QUALITY PROTEIN: beta-1,4-galactosyltransferase 1 [Bos mutus]	Metabolism	Carbohydrate metabolism;Glycan biosynthesis and metabolism	ko00510//N-Glycan biosynthesis;ko00052//Galactose metabolism;ko00514//Other types of O-glycan biosynthesis;ko00601//Glycosphingolipid biosynthesis - lacto and neolacto series;ko00533//Glycosaminoglycan biosynthesis - keratan sulfate	K07966	GO:0043230//extracellular organelle;GO:0098791//Golgi subcompartment;GO:0044446//intracellular organelle part;GO:0043227//membrane-bounded organelle;GO:0016020//membrane;GO:0005903//brush border;GO:0044422//organelle part;GO:0005623//cell;GO:0044444//cytoplasmic part;GO:0005886//plasma membrane;GO:0005622//intracellular;GO:0071944//cell periphery;GO:0098862//cluster of actin-based cell projection…	GO:0016740//transferase activity;GO:0043169//cation binding;GO:0046983//protein dimerization activity;GO:0003824//catalytic activity;GO:0008194//UDP-glycosyltransferase activity;GO:0046872//metal ion binding;GO:0015631//tubulin binding;GO:0016758//transferase activity, transferring hexosyl groups;GO:0046914//transition metal ion binding;GO:0016757//transferase activity, transferring glycosyl grou…	GO:0044707//single-multicellular organism process;GO:0042060//wound healing;GO:0001568//blood vessel development;GO:0072358//cardiovascular system development;GO:0030154//cell differentiation;GO:0030855//epithelial cell differentiation;GO:0006486//protein glycosylation;GO:0008037//cell recognition;GO:0032501//multicellular organismal process;GO:0044702//single organism reproductive process;GO:000…
XP_005893220	0	23.5233	0.001	1.23333	10.2683	0.00755823	0.274565	no	TRIM4	PREDICTED: tripartite motif-containing protein 4 [Bos mutus]	-	-	-	-	GO:0016020//membrane;GO:0044464//cell part;GO:0005623//cell;GO:0044424//intracellular part;GO:0005622//intracellular	GO:0043169//cation binding;GO:0043167//ion binding;GO:0046914//transition metal ion binding;GO:0005488//binding;GO:0046872//metal ion binding	GO:0009987//cellular process;GO:0043933//macromolecular complex subunit organization;GO:0022607//cellular component assembly;GO:0016043//cellular component organization;GO:0071840//cellular component organization or biogenesis;GO:0065003//macromolecular complex assembly;GO:0006461//protein complex assembly;GO:0051259//protein oligomerization;GO:0070271//protein complex biogenesis;GO:0071822//prot…
XP_005901292	0	37.57	0.001	1.23333	10.2683	0.00486288	0.231471	no	ANAPC7	PREDICTED: anaphase-promoting complex subunit 7 [Bos mutus]	Genetic Information Processing;Organismal Systems;Cellular Processes	Cell growth and death;Folding, sorting and degradation;Endocrine system	ko04120//Ubiquitin mediated proteolysis;ko04114//Oocyte meiosis;ko04110//Cell cycle;ko04914//Progesterone-mediated oocyte maturation	K03354	GO:0005622//intracellular;GO:0043231//intracellular membrane-bounded organelle;GO:0044464//cell part;GO:1902494//catalytic complex;GO:0032991//macromolecular complex;GO:0000152//nuclear ubiquitin ligase complex;GO:0043234//protein complex;GO:0044422//organelle part;GO:0000151//ubiquitin ligase complex;GO:0044424//intracellular part;GO:0043226//organelle;GO:0044428//nuclear part;GO:1990234//transf…	GO:0019902//phosphatase binding;GO:0019899//enzyme binding;GO:0005515//protein binding;GO:0005488//binding	GO:0016567//protein ubiquitination;GO:0071704//organic substance metabolic process;GO:0032446//protein modification by small protein conjugation;GO:0044238//primary metabolic process;GO:0044267//cellular protein metabolic process;GO:0008152//metabolic process;GO:0044237//cellular metabolic process;GO:0000209//protein polyubiquitination;GO:0036211//protein modification process;GO:0043170//macromol…
XM_005906163	0	124.177	0.001	1.23	10.2644	0.00017924	0.0459194	up	PUM1	PREDICTED: Bos mutus pumilio RNA-binding family member 1 (PUM1), transcript variant X1, mRNA	-	-	-	-	GO:0036464//cytoplasmic ribonucleoprotein granule;GO:0043232//intracellular non-membrane-bounded organelle;GO:0035770//ribonucleoprotein granule;GO:0043229//intracellular organelle;GO:0030529//intracellular ribonucleoprotein complex;GO:0032991//macromolecular complex;GO:0044444//cytoplasmic part;GO:1990904//ribonucleoprotein complex;GO:0043226//organelle;GO:0044424//intracellular part;GO:0005622/…	GO:0003729//mRNA binding;GO:0044822//poly(A) RNA binding;GO:0097159//organic cyclic compound binding;GO:0005488//binding;GO:0003723//RNA binding;GO:0003676//nucleic acid binding;GO:1901363//heterocyclic compound binding	GO:0006417//regulation of translation;GO:0060255//regulation of macromolecule metabolic process;GO:0044703//multi-organism reproductive process;GO:2000113//negative regulation of cellular macromolecule biosynthetic process;GO:0009987//cellular process;GO:0010629//negative regulation of gene expression;GO:0007049//cell cycle;GO:0019953//sexual reproduction;GO:0051171//regulation of nitrogen compou…
XP_005889544	0	19.91	0.001	1.23	10.2644	0.00689378	0.268745	no	FBXW2	PREDICTED: F-box/WD repeat-containing protein 2 isoform X1 [Bos mutus]	-	-	-	-	-	-	-
XP_014334226	0	46.7167	0.001	1.23	10.2644	0.0110295	0.319958	no	RNF145	PREDICTED: RING finger protein 145 [Bubalus bubalis]	-	-	-	-	-	-	-
XP_005888926	0	19.7467	0.001	1.22667	10.2605	0.0312656	0.468971	no	SDF4	45 kDa calcium-binding protein precursor [Bos taurus]	-	-	-	-	GO:0012505//endomembrane system;GO:0043230//extracellular organelle;GO:1903561//extracellular vesicle;GO:0043231//intracellular membrane-bounded organelle;GO:0005576//extracellular region;GO:0044444//cytoplasmic part;GO:0043227//membrane-bounded organelle;GO:0044446//intracellular organelle part;GO:0044431//Golgi apparatus part;GO:0044464//cell part;GO:0005768//endosome;GO:0044424//intracellular …	GO:0043167//ion binding;GO:0005488//binding;GO:0043169//cation binding	GO:0044699//single-organism process;GO:0048869//cellular developmental process;GO:0044767//single-organism developmental process;GO:0009987//cellular process;GO:0032502//developmental process;GO:0030154//cell differentiation;GO:0044763//single-organism cellular process
XP_005900726	0	80.4033	0.001	1.22333	10.2566	0.00525427	0.241389	no	MTMR4	PREDICTED: myotubularin-related protein 4 [Bos mutus]	Metabolism;Environmental Information Processing	Signal transduction;Carbohydrate metabolism	ko04070//Phosphatidylinositol signaling system;ko00562//Inositol phosphate metabolism	K18082	GO:0005576//extracellular region;GO:0044421//extracellular region part	GO:0016791//phosphatase activity;GO:0042578//phosphoric ester hydrolase activity;GO:0005488//binding;GO:0043169//cation binding;GO:0016787//hydrolase activity;GO:0016788//hydrolase activity, acting on ester bonds;GO:0043167//ion binding;GO:0004721//phosphoprotein phosphatase activity;GO:0003824//catalytic activity	GO:0043412//macromolecule modification;GO:0044699//single-organism process;GO:0050896//response to stimulus;GO:0006464//cellular protein modification process;GO:0050794//regulation of cellular process;GO:0044267//cellular protein metabolic process;GO:0006796//phosphate-containing compound metabolic process;GO:0016311//dephosphorylation;GO:0007154//cell communication;GO:0009987//cellular process;G…
XP_005907380	0	59.15	0.001	1.22333	10.2566	0.000778712	0.0978979	no	DNA2	PREDICTED: DNA replication ATP-dependent helicase/nuclease DNA2 [Bos mutus]	Genetic Information Processing	Replication and repair	ko03030//DNA replication	K10742	GO:0043231//intracellular membrane-bounded organelle;GO:0098687//chromosomal region;GO:0043227//membrane-bounded organelle;GO:0005737//cytoplasm;GO:0070013//intracellular organelle lumen;GO:0000781//chromosome, telomeric region;GO:0044464//cell part;GO:0005623//cell;GO:0044446//intracellular organelle part;GO:0043226//organelle;GO:0043228//non-membrane-bounded organelle;GO:0044422//organelle part…	GO:0097367//carbohydrate derivative binding;GO:0016787//hydrolase activity;GO:0032549//ribonucleoside binding;GO:0004519//endonuclease activity;GO:0008094//DNA-dependent ATPase activity;GO:0042623//ATPase activity, coupled;GO:0003676//nucleic acid binding;GO:0016788//hydrolase activity, acting on ester bonds;GO:0043169//cation binding;GO:0036094//small molecule binding;GO:1901363//heterocyclic co…	GO:0043170//macromolecule metabolic process;GO:0044237//cellular metabolic process;GO:0050896//response to stimulus;GO:0031570//DNA integrity checkpoint;GO:0044249//cellular biosynthetic process;GO:0006259//DNA metabolic process;GO:0016043//cellular component organization;GO:0071840//cellular component organization or biogenesis;GO:0006725//cellular aromatic compound metabolic process;GO:0008152/…
XP_005887218	0	96.3967	0.001	1.21667	10.2487	0.00405425	0.214769	no	BLM	PREDICTED: Bloom syndrome protein [Bos mutus]	Genetic Information Processing	Replication and repair	ko03460//Fanconi anemia pathway;ko03440//Homologous recombination	K10901	GO:0000793//condensed chromosome;GO:0043227//membrane-bounded organelle;GO:0044424//intracellular part;GO:0005694//chromosome;GO:0044451//nucleoplasm part;GO:0005622//intracellular;GO:0031981//nuclear lumen;GO:0044422//organelle part;GO:0043231//intracellular membrane-bounded organelle;GO:0044464//cell part;GO:0043226//organelle;GO:0043232//intracellular non-membrane-bounded organelle;GO:0070013/…	GO:0005488//binding;GO:0005515//protein binding;GO:0008026//ATP-dependent helicase activity;GO:1901363//heterocyclic compound binding;GO:0097367//carbohydrate derivative binding;GO:0003677//DNA binding;GO:0032550//purine ribonucleoside binding;GO:0016818//hydrolase activity, acting on acid anhydrides, in phosphorus-containing anhydrides;GO:0097159//organic cyclic compound binding;GO:0016817//hydr…	GO:0009719//response to endogenous stimulus;GO:0090304//nucleic acid metabolic process;GO:0043170//macromolecule metabolic process;GO:0006461//protein complex assembly;GO:1901360//organic cyclic compound metabolic process;GO:1901362//organic cyclic compound biosynthetic process;GO:0051171//regulation of nitrogen compound metabolic process;GO:0000278//mitotic cell cycle;GO:0048523//negative regula…
XM_005908335	0	10.1433	0.001	1.21333	10.2448	0.0197111	0.399285	no	LSM11	PREDICTED: Bos mutus LSM11, U7 small nuclear RNA associated (LSM11), mRNA	-	-	-	-	-	-	-
XP_005890204	0	9.90667	0.001	1.21	10.2408	0.0229239	0.416745	no	MFF	PREDICTED: mitochondrial fission factor isoform X7 [Bos mutus]	-	-	-	-	GO:0044464//cell part;GO:0043231//intracellular membrane-bounded organelle;GO:0005741//mitochondrial outer membrane;GO:0005623//cell;GO:0044444//cytoplasmic part;GO:0005622//intracellular;GO:0044425//membrane part;GO:0098805//whole membrane;GO:0031966//mitochondrial membrane;GO:0016021//integral component of membrane;GO:0031975//envelope;GO:0044422//organelle part;GO:0031967//organelle envelope;G…	GO:0005488//binding;GO:0005515//protein binding;GO:0046983//protein dimerization activity	GO:0000266//mitochondrial fission;GO:0044699//single-organism process;GO:0044700//single organism signaling;GO:1902582//single-organism intracellular transport;GO:0001836//release of cytochrome c from mitochondria;GO:0061024//membrane organization;GO:0065003//macromolecular complex assembly;GO:0051259//protein oligomerization;GO:0034613//cellular protein localization;GO:0015031//protein transport…
XP_005900826	0.00333333	101.287	0.001	1.20667	10.2368	0.00375305	0.206299	no	RUSC2	PREDICTED: iporin isoform X1 [Bos mutus]	-	-	-	-	GO:0044464//cell part;GO:0043226//organelle;GO:0005576//extracellular region;GO:0044424//intracellular part;GO:0043230//extracellular organelle;GO:0043227//membrane-bounded organelle;GO:1903561//extracellular vesicle;GO:0005737//cytoplasm;GO:0005622//intracellular;GO:0031982//vesicle;GO:0005623//cell;GO:0044421//extracellular region part	-	-
XP_005900827	0.00333333	101.287	0.001	1.20667	10.2368	0.00375281	0.206299	no	RUSC2	PREDICTED: iporin isoform X1 [Bos mutus]	-	-	-	-	GO:0043230//extracellular organelle;GO:0005622//intracellular;GO:1903561//extracellular vesicle;GO:0043226//organelle;GO:0005737//cytoplasm;GO:0044464//cell part;GO:0044421//extracellular region part;GO:0031982//vesicle;GO:0005623//cell;GO:0043227//membrane-bounded organelle;GO:0005576//extracellular region;GO:0044424//intracellular part	-	-
XM_005898085	0	114.46	0.001	1.19667	10.2248	0.000180008	0.0459194	up	PBRM1	PREDICTED: Bos mutus polybromo 1 (PBRM1), transcript variant X3, mRNA	-	-	-	-	GO:0044424//intracellular part;GO:0005622//intracellular;GO:0005634//nucleus;GO:0043227//membrane-bounded organelle;GO:0043234//protein complex;GO:0070603//SWI/SNF superfamily-type complex;GO:0043226//organelle;GO:0031974//membrane-enclosed lumen;GO:0005623//cell;GO:0044428//nuclear part;GO:0043231//intracellular membrane-bounded organelle;GO:0031981//nuclear lumen;GO:0043229//intracellular organ…	-	GO:0044699//single-organism process;GO:0008283//cell proliferation
XP_005899550	0	63.31	0.001	1.19667	10.2248	0.0073047	0.274106	no	RAB3GAP1	PREDICTED: rab3 GTPase-activating protein catalytic subunit isoform X2 [Bos mutus]	-	-	-	-	-	-	-
XM_005893309	0	16.5767	0.001	1.19	10.2167	0.00402156	0.213736	no	UPRT	PREDICTED: Bos mutus uracil phosphoribosyltransferase (FUR1) homolog (S. cerevisiae) (UPRT), transcript variant X2, mRNA	Metabolism	Nucleotide metabolism	ko00240//Pyrimidine metabolism	K00761	-	-	-
XM_005900673	0	17.7533	0.001	1.19	10.2167	0.0355906	0.491404	no	CSRP3	PREDICTED: Bos mutus cysteine and glycine-rich protein 3 (cardiac LIM protein) (CSRP3), transcript variant X2, mRNA	-	-	-	-	GO:0044449//contractile fiber part;GO:0005623//cell;GO:0044424//intracellular part;GO:0043226//organelle;GO:0043292//contractile fiber;GO:0043231//intracellular membrane-bounded organelle;GO:0043228//non-membrane-bounded organelle;GO:0043229//intracellular organelle;GO:0044422//organelle part;GO:0043232//intracellular non-membrane-bounded organelle;GO:0043227//membrane-bounded organelle;GO:003001…	GO:0005515//protein binding;GO:0046872//metal ion binding;GO:0043169//cation binding;GO:0046914//transition metal ion binding;GO:0005198//structural molecule activity;GO:0008092//cytoskeletal protein binding;GO:0043167//ion binding;GO:0005488//binding	GO:0030003//cellular cation homeostasis;GO:0042692//muscle cell differentiation;GO:0003008//system process;GO:0032501//multicellular organismal process;GO:0010467//gene expression;GO:0019438//aromatic compound biosynthetic process;GO:0016043//cellular component organization;GO:0030036//actin cytoskeleton organization;GO:0051179//localization;GO:0006725//cellular aromatic compound metabolic proces…
XP_005887104	0	66.9133	0.001	1.19	10.2167	0.00667915	0.267049	no	PSMD1	PREDICTED: 26S proteasome non-ATPase regulatory subunit 1 [Bos mutus]	Genetic Information Processing	Folding, sorting and degradation	ko03050//Proteasome	K03032	-	-	-
XP_014334778	0	12.2767	0.001	1.19	10.2167	0.0087854	0.292013	no	SPATA9	PREDICTED: spermatogenesis-associated protein 9 [Bos mutus]	-	-	-	-	GO:0016020//membrane;GO:0031224//intrinsic component of membrane;GO:0044425//membrane part	-	GO:0044703//multi-organism reproductive process;GO:0032504//multicellular organism reproduction;GO:0000003//reproduction;GO:0044702//single organism reproductive process;GO:0022414//reproductive process;GO:0019953//sexual reproduction;GO:0051704//multi-organism process;GO:0007276//gamete generation;GO:0044763//single-organism cellular process;GO:0048609//multicellular organismal reproductive proc…
XP_005890892	0	56.4567	0.001	1.18333	10.2086	0.000752031	0.0966574	no	RC3H1	PREDICTED: roquin-1 isoform X2 [Bos mutus]	-	-	-	-	GO:0043226//organelle;GO:0035770//ribonucleoprotein granule;GO:0005623//cell;GO:0043228//non-membrane-bounded organelle;GO:0044464//cell part;GO:0030529//intracellular ribonucleoprotein complex;GO:0005737//cytoplasm;GO:0032991//macromolecular complex;GO:0044444//cytoplasmic part;GO:0043232//intracellular non-membrane-bounded organelle;GO:0036464//cytoplasmic ribonucleoprotein granule;GO:1990904//…	GO:0043169//cation binding;GO:0003729//mRNA binding;GO:1901363//heterocyclic compound binding;GO:0044822//poly(A) RNA binding;GO:0046872//metal ion binding;GO:0005488//binding;GO:0046914//transition metal ion binding;GO:0043167//ion binding;GO:0003676//nucleic acid binding;GO:0097159//organic cyclic compound binding;GO:0003723//RNA binding	GO:0001776//leukocyte homeostasis;GO:0002698//negative regulation of immune effector process;GO:0030154//cell differentiation;GO:0002366//leukocyte activation involved in immune response;GO:0044237//cellular metabolic process;GO:0010468//regulation of gene expression;GO:0042110//T cell activation;GO:0044270//cellular nitrogen compound catabolic process;GO:0009056//catabolic process;GO:0071826//ri…
XP_005901217	0	21.5967	0.001	1.18333	10.2086	0.0283897	0.450344	no	RAB3IP	PREDICTED: rab-3A-interacting protein isoform X2 [Bos mutus]	-	-	-	-	GO:0043226//organelle;GO:0005622//intracellular;GO:0044422//organelle part;GO:0031252//cell leading edge;GO:0044446//intracellular organelle part;GO:0005815//microtubule organizing center;GO:0044424//intracellular part;GO:0005856//cytoskeleton;GO:0043232//intracellular non-membrane-bounded organelle;GO:0044464//cell part;GO:0044430//cytoskeletal part;GO:0044444//cytoplasmic part;GO:0005737//cytop…	GO:0005085//guanyl-nucleotide exchange factor activity;GO:0005088//Ras guanyl-nucleotide exchange factor activity;GO:0098772//molecular function regulator	GO:0071840//cellular component organization or biogenesis;GO:0009987//cellular process;GO:0051649//establishment of localization in cell;GO:0006810//transport;GO:0032989//cellular component morphogenesis;GO:0044763//single-organism cellular process;GO:0050790//regulation of catalytic activity;GO:0006892//post-Golgi vesicle-mediated transport;GO:0032502//developmental process;GO:0051234//establish…
XP_005891992	0	50.45	0.001	1.17667	10.2005	0.00139739	0.134492	no	EPC1	PREDICTED: enhancer of polycomb homolog 1 isoform X2 [Bos mutus]	-	-	-	-	GO:0005623//cell;GO:0044428//nuclear part;GO:0031975//envelope;GO:0005622//intracellular;GO:0044446//intracellular organelle part;GO:1990234//transferase complex;GO:0043233//organelle lumen;GO:0043226//organelle;GO:0043227//membrane-bounded organelle;GO:0005634//nucleus;GO:0032991//macromolecular complex;GO:0012505//endomembrane system;GO:0043189//H4/H2A histone acetyltransferase complex;GO:00056…	GO:0061733//peptide-lysine-N-acetyltransferase activity;GO:0016407//acetyltransferase activity;GO:0016410//N-acyltransferase activity;GO:0003824//catalytic activity;GO:0016740//transferase activity;GO:0008080//N-acetyltransferase activity;GO:0034212//peptide N-acetyltransferase activity;GO:0005488//binding;GO:0016747//transferase activity, transferring acyl groups other than amino-acyl groups;GO:…	GO:0043933//macromolecular complex subunit organization;GO:0071840//cellular component organization or biogenesis;GO:0048519//negative regulation of biological process;GO:0044238//primary metabolic process;GO:0007275//multicellular organism development;GO:0019438//aromatic compound biosynthetic process;GO:0044260//cellular macromolecule metabolic process;GO:1901360//organic cyclic compound metabo…
XP_014334694	0	28.2633	0.001	1.17667	10.2005	0.00182995	0.153616	no	PXK	PX domain-containing protein kinase-like protein [Bos taurus]	-	-	-	-	GO:0044424//intracellular part;GO:0043229//intracellular organelle;GO:0044464//cell part;GO:0032991//macromolecular complex;GO:0043232//intracellular non-membrane-bounded organelle;GO:0016020//membrane;GO:0043231//intracellular membrane-bounded organelle;GO:0043226//organelle;GO:0005623//cell;GO:0015630//microtubule cytoskeleton;GO:0043228//non-membrane-bounded organelle;GO:0005856//cytoskeleton;…	GO:0003824//catalytic activity;GO:0032549//ribonucleoside binding;GO:0016772//transferase activity, transferring phosphorus-containing groups;GO:0036094//small molecule binding;GO:0016740//transferase activity;GO:0001883//purine nucleoside binding;GO:0005515//protein binding;GO:0005488//binding;GO:0097159//organic cyclic compound binding;GO:0032550//purine ribonucleoside binding;GO:0016301//kinas…	GO:0023052//signaling;GO:0008152//metabolic process;GO:0099537//trans-synaptic signaling;GO:0006952//defense response;GO:0051336//regulation of hydrolase activity;GO:0043170//macromolecule metabolic process;GO:0099536//synaptic signaling;GO:0050896//response to stimulus;GO:0019538//protein metabolic process;GO:0006811//ion transport;GO:0065007//biological regulation;GO:0006810//transport;GO:00442…
XM_005889222	0	39.8267	0.001	1.17333	10.1964	0.00214684	0.165178	no	ELP2	PREDICTED: Bos mutus elongator acetyltransferase complex subunit 2 (ELP2), transcript variant X5, mRNA	-	-	-	-	GO:0044424//intracellular part;GO:0044464//cell part;GO:0032991//macromolecular complex;GO:0005622//intracellular;GO:0043234//protein complex;GO:0005623//cell	GO:0005488//binding;GO:0001099//basal RNA polymerase II transcription machinery binding;GO:0001098//basal transcription machinery binding;GO:0019900//kinase binding;GO:0019899//enzyme binding;GO:0005515//protein binding	GO:0065007//biological regulation;GO:0050789//regulation of biological process;GO:0051716//cellular response to stimulus;GO:0035556//intracellular signal transduction;GO:0007259//JAK-STAT cascade;GO:0007165//signal transduction;GO:0044700//single organism signaling;GO:0007154//cell communication;GO:0050794//regulation of cellular process;GO:0044763//single-organism cellular process;GO:0044699//si…
XP_005897562	0	80.8933	0.001	1.17	10.1923	4.96e-06	0.00334385	up	TRPM3	PREDICTED: transient receptor potential cation channel subfamily M member 3 isoform X26 [Bos mutus]	-	-	-	-	GO:0044425//membrane part;GO:0016020//membrane;GO:0031224//intrinsic component of membrane	GO:0022857//transmembrane transporter activity;GO:0022892//substrate-specific transporter activity;GO:0022838//substrate-specific channel activity;GO:0005216//ion channel activity;GO:0008324//cation transmembrane transporter activity;GO:0022803//passive transmembrane transporter activity;GO:0015267//channel activity;GO:0022891//substrate-specific transmembrane transporter activity;GO:0015075//ion…	GO:0009266//response to temperature stimulus;GO:0006810//transport;GO:0044763//single-organism cellular process;GO:0051259//protein oligomerization;GO:0009628//response to abiotic stimulus;GO:0006461//protein complex assembly;GO:0016043//cellular component organization;GO:0051234//establishment of localization;GO:0022607//cellular component assembly;GO:0070271//protein complex biogenesis;GO:00068…
XP_005910422	0	52.9867	0.001	1.16667	10.1882	0.00925151	0.298203	no	LEMD3	PREDICTED: inner nuclear membrane protein Man1 [Bos mutus]	-	-	-	-	GO:0005635//nuclear envelope;GO:0044424//intracellular part;GO:0012505//endomembrane system;GO:0005623//cell;GO:0043226//organelle;GO:0044422//organelle part;GO:0031967//organelle envelope;GO:0043231//intracellular membrane-bounded organelle;GO:0044425//membrane part;GO:0031224//intrinsic component of membrane;GO:0019866//organelle inner membrane;GO:0005637//nuclear inner membrane;GO:0031965//nuc…	GO:0005488//binding;GO:0036094//small molecule binding	GO:0010468//regulation of gene expression;GO:0007165//signal transduction;GO:0009987//cellular process;GO:0060255//regulation of macromolecule metabolic process;GO:0031326//regulation of cellular biosynthetic process;GO:0051252//regulation of RNA metabolic process;GO:2001141//regulation of RNA biosynthetic process;GO:0007179//transforming growth factor beta receptor signaling pathway;GO:0007166//…
XP_005894285	0	45.42	0.001	1.16	10.1799	0.00190167	0.156163	no	RAD54L	DNA repair and recombination protein RAD54-like [Bos taurus]	Genetic Information Processing	Replication and repair	ko03440//Homologous recombination	K10875	GO:0043227//membrane-bounded organelle;GO:0043231//intracellular membrane-bounded organelle;GO:0044424//intracellular part;GO:0043229//intracellular organelle;GO:0044464//cell part;GO:0044422//organelle part;GO:0005622//intracellular;GO:0005634//nucleus;GO:0044428//nuclear part;GO:0043226//organelle;GO:0044446//intracellular organelle part;GO:0043233//organelle lumen;GO:0031974//membrane-enclosed…	GO:0017111//nucleoside-triphosphatase activity;GO:0036094//small molecule binding;GO:0016462//pyrophosphatase activity;GO:1901363//heterocyclic compound binding;GO:0016817//hydrolase activity, acting on acid anhydrides;GO:0005488//binding;GO:0097159//organic cyclic compound binding;GO:0003824//catalytic activity;GO:0032550//purine ribonucleoside binding;GO:0032549//ribonucleoside binding;GO:00168…	GO:0032502//developmental process;GO:0007275//multicellular organism development;GO:0006996//organelle organization;GO:0032501//multicellular organismal process;GO:0044238//primary metabolic process;GO:0071704//organic substance metabolic process;GO:0006950//response to stress;GO:0006281//DNA repair;GO:0048856//anatomical structure development;GO:0090304//nucleic acid metabolic process;GO:0044237…
XP_005907957	0	45.1067	0.001	1.16	10.1799	7.97e-05	0.0270179	up	ARHGEF6	PREDICTED: LOW QUALITY PROTEIN: rho guanine nucleotide exchange factor 6 [Bos mutus]	Cellular Processes	Cell motility	ko04810//Regulation of actin cytoskeleton	K05729	GO:0044464//cell part;GO:0005623//cell	GO:0098772//molecular function regulator;GO:0005088//Ras guanyl-nucleotide exchange factor activity;GO:0005085//guanyl-nucleotide exchange factor activity	GO:0044699//single-organism process;GO:0035556//intracellular signal transduction;GO:0007266//Rho protein signal transduction;GO:0065009//regulation of molecular function;GO:0050794//regulation of cellular process;GO:0009987//cellular process;GO:0007265//Ras protein signal transduction;GO:0043087//regulation of GTPase activity;GO:0050896//response to stimulus;GO:0050789//regulation of biological …
XP_014332215	0	34.9833	0.001	1.15667	10.1758	0.0158461	0.364743	no	HSD17B4	PREDICTED: peroxisomal multifunctional enzyme type 2 isoform X4 [Bos mutus]	Metabolism;Cellular Processes	Lipid metabolism;Transport and catabolism	ko04146//Peroxisome;ko00120//Primary bile acid biosynthesis	K12405	GO:0043226//organelle;GO:0044438//microbody part;GO:0044446//intracellular organelle part;GO:0044439//peroxisomal part;GO:0005622//intracellular;GO:0043231//intracellular membrane-bounded organelle;GO:0005777//peroxisome;GO:0043229//intracellular organelle;GO:0005737//cytoplasm;GO:0044424//intracellular part;GO:0044444//cytoplasmic part;GO:0044422//organelle part;GO:0005623//cell;GO:0044464//cell…	GO:0046983//protein dimerization activity;GO:0016229//steroid dehydrogenase activity;GO:0016614//oxidoreductase activity, acting on CH-OH group of donors;GO:0005515//protein binding;GO:0005488//binding;GO:0016829//lyase activity;GO:0003824//catalytic activity;GO:0033764//steroid dehydrogenase activity, acting on the CH-OH group of donors, NAD or NADP as acceptor;GO:0016491//oxidoreductase activit…	GO:0008152//metabolic process;GO:0035383//thioester metabolic process;GO:0016042//lipid catabolic process;GO:0006637//acyl-CoA metabolic process;GO:0006631//fatty acid metabolic process;GO:0043436//oxoacid metabolic process;GO:0044710//single-organism metabolic process;GO:0008202//steroid metabolic process;GO:0030154//cell differentiation;GO:0044248//cellular catabolic process;GO:1901575//organic…
XM_005898182	0	18.4	0.001	1.15333	10.1716	0.00739151	0.274416	no	RP2	PREDICTED: Bos mutus retinitis pigmentosa 2 (X-linked recessive) (RP2), transcript variant X2, mRNA	-	-	-	-	GO:0015630//microtubule cytoskeleton;GO:0044459//plasma membrane part;GO:0044464//cell part;GO:1903561//extracellular vesicle;GO:0043228//non-membrane-bounded organelle;GO:0031982//vesicle;GO:0005886//plasma membrane;GO:0005576//extracellular region;GO:0005856//cytoskeleton;GO:0043231//intracellular membrane-bounded organelle;GO:0044430//cytoskeletal part;GO:0044425//membrane part;GO:0043227//mem…	GO:0097367//carbohydrate derivative binding;GO:0005488//binding;GO:0001882//nucleoside binding;GO:0032549//ribonucleoside binding;GO:0097159//organic cyclic compound binding;GO:1901363//heterocyclic compound binding;GO:0030234//enzyme regulator activity;GO:0036094//small molecule binding;GO:0005515//protein binding;GO:0098772//molecular function regulator;GO:0008092//cytoskeletal protein binding;…	GO:0044763//single-organism cellular process;GO:0051336//regulation of hydrolase activity;GO:0032989//cellular component morphogenesis;GO:0032502//developmental process;GO:0044699//single-organism process;GO:0065009//regulation of molecular function;GO:0016043//cellular component organization;GO:0009653//anatomical structure morphogenesis;GO:0048856//anatomical structure development;GO:0071840//c…
XP_005905680	0	41.9233	0.001	1.15	10.1674	0.00203162	0.159187	no	TCF12	PREDICTED: transcription factor 12 isoform X1 [Bos mutus]	-	-	-	-	-	-	-
XP_014332214	0	199.59	0.001	1.15	10.1674	3.67e-05	0.0158109	up	DMXL1	PREDICTED: dmX-like protein 1 isoform X3 [Bison bison bison]	-	-	-	-	-	-	-
XP_005889865	0	52.6833	0.001	1.14333	10.159	0.00934585	0.299466	no	PAM	PREDICTED: peptidyl-glycine alpha-amidating monooxygenase isoform X5 [Bos mutus]	-	-	-	-	GO:0005576//extracellular region;GO:0043229//intracellular organelle;GO:0097708//intracellular vesicle;GO:0005622//intracellular;GO:0012505//endomembrane system;GO:1903561//extracellular vesicle;GO:0043230//extracellular organelle;GO:0031224//intrinsic component of membrane;GO:0043231//intracellular membrane-bounded organelle;GO:0044425//membrane part;GO:0005623//cell;GO:0043226//organelle;GO:003…	GO:0046872//metal ion binding;GO:0019842//vitamin binding;GO:0005488//binding;GO:0016705//oxidoreductase activity, acting on paired donors, with incorporation or reduction of molecular oxygen;GO:0016829//lyase activity;GO:0046914//transition metal ion binding;GO:0016840//carbon-nitrogen lyase activity;GO:0043169//cation binding;GO:0036094//small molecule binding;GO:0016715//oxidoreductase activit…	GO:0009987//cellular process;GO:0008152//metabolic process;GO:0044699//single-organism process;GO:0044710//single-organism metabolic process;GO:0044237//cellular metabolic process;GO:0043603//cellular amide metabolic process;GO:0006807//nitrogen compound metabolic process;GO:0034641//cellular nitrogen compound metabolic process
XP_005910282	0	31.38	0.001	1.14333	10.159	0.00419976	0.219163	no	ALDH4A1	PREDICTED: delta-1-pyrroline-5-carboxylate dehydrogenase, mitochondrial [Bos mutus]	Metabolism	Amino acid metabolism	ko00330//Arginine and proline metabolism;ko00250//Alanine, aspartate and glutamate metabolism	K00294	-	-	-
XP_014332722	0	77.98	0.001	1.14333	10.159	0.0054674	0.24527	no	NEK1	PREDICTED: serine/threonine-protein kinase Nek1 isoform X1 [Bison bison bison]	-	-	-	-	-	-	-
XP_005898587	0	20.7767	0.001	1.14	10.1548	0.0294167	0.456172	no	TXNIP	thioredoxin-interacting protein [Bos taurus]	-	-	-	-	GO:0044464//cell part;GO:0044424//intracellular part;GO:0005622//intracellular;GO:0005623//cell	GO:0044389//ubiquitin-like protein ligase binding;GO:0019899//enzyme binding;GO:0005488//binding;GO:0005515//protein binding;GO:0098772//molecular function regulator;GO:0030234//enzyme regulator activity	GO:0051716//cellular response to stimulus;GO:0050896//response to stimulus;GO:0007167//enzyme linked receptor protein signaling pathway;GO:0006351//transcription, DNA-templated;GO:0007169//transmembrane receptor protein tyrosine kinase signaling pathway;GO:0009987//cellular process;GO:0006139//nucleobase-containing compound metabolic process;GO:1901576//organic substance biosynthetic process;GO:0…
XP_005902894	0	26.1467	0.001	1.14	10.1548	0.00470515	0.229375	no	TMCC1	PREDICTED: transmembrane and coiled-coil domains protein 1 isoform X3 [Bos mutus]	-	-	-	-	GO:0016020//membrane;GO:0044425//membrane part;GO:0031224//intrinsic component of membrane	-	-
XP_005891935	0	55.8933	0.001	1.13	10.1421	0.00855189	0.288448	no	ZMIZ2	PREDICTED: zinc finger MIZ domain-containing protein 2-like isoform X1 [Bos mutus]	-	-	-	-	GO:0005623//cell;GO:0005634//nucleus;GO:0044446//intracellular organelle part;GO:0044422//organelle part;GO:0043233//organelle lumen;GO:0031981//nuclear lumen;GO:0044424//intracellular part;GO:0043226//organelle;GO:0070013//intracellular organelle lumen;GO:0005622//intracellular;GO:0044464//cell part;GO:0043227//membrane-bounded organelle;GO:0031974//membrane-enclosed lumen;GO:0044428//nuclear pa…	GO:0043167//ion binding;GO:0043169//cation binding;GO:0046872//metal ion binding;GO:0046914//transition metal ion binding;GO:0000988//transcription factor activity, protein binding;GO:0003712//transcription cofactor activity;GO:0005488//binding;GO:0000989//transcription factor activity, transcription factor binding;GO:0003713//transcription coactivator activity	GO:0006725//cellular aromatic compound metabolic process;GO:0006351//transcription, DNA-templated;GO:0043170//macromolecule metabolic process;GO:0019438//aromatic compound biosynthetic process;GO:1901362//organic cyclic compound biosynthetic process;GO:0044260//cellular macromolecule metabolic process;GO:0071704//organic substance metabolic process;GO:0006139//nucleobase-containing compound metab…
XM_005902599	0	57.6667	0.001	1.12667	10.1378	0.000761487	0.0966574	no	TRPM8	PREDICTED: Bos mutus transient receptor potential cation channel, subfamily M, member 8 (TRPM8), mRNA	Organismal Systems	Sensory system	ko04750//Inflammatory mediator regulation of TRP channels	K04983	GO:0044464//cell part;GO:0016020//membrane;GO:0005886//plasma membrane;GO:0071944//cell periphery;GO:0044425//membrane part;GO:0031224//intrinsic component of membrane;GO:0005623//cell	GO:0005261//cation channel activity;GO:0005216//ion channel activity;GO:0022891//substrate-specific transmembrane transporter activity;GO:0022857//transmembrane transporter activity;GO:0015267//channel activity;GO:0005215//transporter activity;GO:0046983//protein dimerization activity;GO:0022803//passive transmembrane transporter activity;GO:0005488//binding;GO:0015075//ion transmembrane transpor…	GO:0042592//homeostatic process;GO:0043933//macromolecular complex subunit organization;GO:0070838//divalent metal ion transport;GO:0006812//cation transport;GO:0044763//single-organism cellular process;GO:0030001//metal ion transport;GO:0051260//protein homooligomerization;GO:0003008//system process;GO:0006875//cellular metal ion homeostasis;GO:0051259//protein oligomerization;GO:0048878//chemic…
XP_005904308	0	20.5733	0.001	1.12667	10.1378	0.00169335	0.148612	no	TMEM237	PREDICTED: transmembrane protein 237 [Bos mutus]	-	-	-	-	GO:0016020//membrane;GO:0042995//cell projection;GO:0031513//nonmotile primary cilium;GO:0072372//primary cilium;GO:0005623//cell;GO:0031224//intrinsic component of membrane;GO:0044464//cell part;GO:0043226//organelle;GO:0005929//cilium;GO:0044425//membrane part	-	GO:0007165//signal transduction;GO:0198738//cell-cell signaling by wnt;GO:0016055//Wnt signaling pathway;GO:0071840//cellular component organization or biogenesis;GO:0048856//anatomical structure development;GO:0051716//cellular response to stimulus;GO:0022607//cellular component assembly;GO:0050794//regulation of cellular process;GO:0048869//cellular developmental process;GO:0007267//cell-cell s…
XP_005894918	0	16.39	0.001	1.12	10.1293	0.0100355	0.306966	no	MRPS30	PREDICTED: 28S ribosomal protein S30, mitochondrial [Bos mutus]	-	-	-	-	GO:0043229//intracellular organelle;GO:1990904//ribonucleoprotein complex;GO:0031975//envelope;GO:0044422//organelle part;GO:0005622//intracellular;GO:0016020//membrane;GO:0044446//intracellular organelle part;GO:0043226//organelle;GO:0031967//organelle envelope;GO:0019866//organelle inner membrane;GO:0031090//organelle membrane;GO:0030529//intracellular ribonucleoprotein complex;GO:0032991//macr…	GO:0097159//organic cyclic compound binding;GO:0005488//binding;GO:0003676//nucleic acid binding;GO:1901363//heterocyclic compound binding;GO:0003723//RNA binding	GO:0006414//translational elongation;GO:0044271//cellular nitrogen compound biosynthetic process;GO:0043043//peptide biosynthetic process;GO:0043170//macromolecule metabolic process;GO:0009058//biosynthetic process;GO:1901576//organic substance biosynthetic process;GO:0043604//amide biosynthetic process;GO:0043603//cellular amide metabolic process;GO:0044260//cellular macromolecule metabolic proc…
XM_005894595	0	12.8767	0.001	1.11667	10.125	0.00660699	0.266862	no	MOB4	PREDICTED: Bos mutus MOB family member 4, phocein (MOB4), transcript variant X2, mRNA	-	-	-	-	GO:0098588//bounding membrane of organelle;GO:0044464//cell part;GO:0044431//Golgi apparatus part;GO:0043231//intracellular membrane-bounded organelle;GO:0000139//Golgi membrane;GO:0005794//Golgi apparatus;GO:0044446//intracellular organelle part;GO:0043226//organelle;GO:0097458//neuron part;GO:0005623//cell;GO:0043005//neuron projection;GO:0012505//endomembrane system;GO:0005737//cytoplasm;GO:00…	GO:0019899//enzyme binding;GO:0005515//protein binding;GO:0005488//binding;GO:0043167//ion binding;GO:0043169//cation binding	GO:0006810//transport;GO:0051234//establishment of localization;GO:0051179//localization;GO:0016192//vesicle-mediated transport
XM_005911320	0	16	0.001	1.11667	10.125	0.0316488	0.470399	no	PTK6	PREDICTED: Bos mutus protein tyrosine kinase 6 (PTK6), mRNA	-	-	-	-	-	-	-
XM_005906527	0	21.36	0.001	1.11333	10.1207	0.00662119	0.266862	no	PROKR2	PREDICTED: Bos mutus prokineticin receptor 2 (PROKR2), mRNA	-	-	-	-	-	-	-
XP_005892820	0	225.463	0.001	1.11333	10.1207	0.000317133	0.0639969	no	WDFY3	PREDICTED: WD repeat and FYVE domain-containing protein 3 [Bos mutus]	-	-	-	-	GO:0031981//nuclear lumen;GO:0005654//nucleoplasm;GO:0005622//intracellular;GO:0044451//nucleoplasm part;GO:0005774//vacuolar membrane;GO:0044424//intracellular part;GO:0043229//intracellular organelle;GO:0098588//bounding membrane of organelle;GO:0044446//intracellular organelle part;GO:0044428//nuclear part;GO:0043231//intracellular membrane-bounded organelle;GO:0044425//membrane part;GO:003131…	GO:0008289//lipid binding;GO:0035091//phosphatidylinositol binding;GO:0043169//cation binding;GO:0005488//binding;GO:0043167//ion binding;GO:0005543//phospholipid binding	GO:0048522//positive regulation of cellular process;GO:0010506//regulation of autophagy;GO:0009987//cellular process;GO:0006914//autophagy;GO:0065007//biological regulation;GO:0016236//macroautophagy;GO:0010508//positive regulation of autophagy;GO:0050794//regulation of cellular process;GO:0050789//regulation of biological process;GO:0048518//positive regulation of biological process
XP_005905682	0	28.1967	0.001	1.11333	10.1207	0.00844057	0.287182	no	TCF12	PREDICTED: transcription factor 12 isoform X3 [Bos mutus]	-	-	-	-	-	-	-
XM_005889049	0	42.8333	0.001	1.10333	10.1077	0.00147565	0.137767	no	PDE4D	PREDICTED: Bos mutus phosphodiesterase 4D, cAMP-specific (PDE4D), transcript variant X3, mRNA	Environmental Information Processing;Metabolism	Nucleotide metabolism;Signal transduction	ko04024//cAMP signaling pathway;ko00230//Purine metabolism	K13293	GO:0044444//cytoplasmic part;GO:0005622//intracellular;GO:0043232//intracellular non-membrane-bounded organelle;GO:0005856//cytoskeleton;GO:0044446//intracellular organelle part;GO:0044464//cell part;GO:0044425//membrane part;GO:1990351//transporter complex;GO:0015630//microtubule cytoskeleton;GO:0044424//intracellular part;GO:0034703//cation channel complex;GO:0005815//microtubule organizing cen…	GO:0052712//inositol phosphosphingolipid phospholipase activity;GO:1901363//heterocyclic compound binding;GO:0097159//organic cyclic compound binding;GO:0005102//receptor binding;GO:1901265//nucleoside phosphate binding;GO:0042578//phosphoric ester hydrolase activity;GO:0004114//3',5'-cyclic-nucleotide phosphodiesterase activity;GO:0043169//cation binding;GO:0003824//catalytic activity;GO:0005488…	GO:0010243//response to organonitrogen compound;GO:0048583//regulation of response to stimulus;GO:0007186//G-protein coupled receptor signaling pathway;GO:0002768//immune response-regulating cell surface receptor signaling pathway;GO:0045936//negative regulation of phosphate metabolic process;GO:0051283//negative regulation of sequestering of calcium ion;GO:0051674//localization of cell;GO:000680…
XM_005901768	0	28.1567	0.001	1.10333	10.1077	0.0164894	0.369676	no	PLAT	PREDICTED: Bos mutus plasminogen activator, tissue (PLAT), transcript variant X2, mRNA	Organismal Systems	Immune system	ko04610//Complement and coagulation cascades	K01343	GO:0005576//extracellular region;GO:0044464//cell part;GO:0005622//intracellular;GO:0044424//intracellular part;GO:1903561//extracellular vesicle;GO:0044421//extracellular region part;GO:0043230//extracellular organelle;GO:0043226//organelle;GO:0005623//cell;GO:0031982//vesicle;GO:0012505//endomembrane system;GO:0043227//membrane-bounded organelle	GO:0070011//peptidase activity, acting on L-amino acid peptides;GO:0016787//hydrolase activity;GO:0003824//catalytic activity;GO:0005488//binding;GO:0005515//protein binding;GO:0008233//peptidase activity;GO:0004175//endopeptidase activity	GO:0050789//regulation of biological process;GO:0019538//protein metabolic process;GO:0051674//localization of cell;GO:0006928//movement of cell or subcellular component;GO:0007169//transmembrane receptor protein tyrosine kinase signaling pathway;GO:0007165//signal transduction;GO:0051604//protein maturation;GO:0007154//cell communication;GO:0043170//macromolecule metabolic process;GO:0006508//pr…
XP_005908552	0	19.0133	0.001	1.10333	10.1077	0.00804185	0.281733	no	LOC102273852	Chromosome 9 open reading frame 114 [Homo sapiens]	Metabolism	Amino acid metabolism;Metabolism of other amino acids	ko00380//Tryptophan metabolism;ko00450//Selenocompound metabolism	K00816	-	-	-
XM_005888216	0	13.2867	0.001	1.1	10.1033	0.0392652	0.506228	no	GOSR1	PREDICTED: Bos mutus golgi SNAP receptor complex member 1 (GOSR1), transcript variant X3, mRNA	Genetic Information Processing	Folding, sorting and degradation	ko04130//SNARE interactions in vesicular transport	K08495	-	-	-
XP_005906627	0	14.6833	0.001	1.1	10.1033	0.0429839	0.520943	no	MINPP1	PREDICTED: multiple inositol polyphosphate phosphatase 1 isoform X5 [Bos mutus]	Metabolism	Carbohydrate metabolism	ko00010//Glycolysis / Gluconeogenesis;ko00562//Inositol phosphate metabolism	K03103	GO:0043230//extracellular organelle;GO:0044421//extracellular region part;GO:0043226//organelle;GO:0031982//vesicle;GO:0043227//membrane-bounded organelle;GO:1903561//extracellular vesicle;GO:0005576//extracellular region	GO:0016787//hydrolase activity;GO:0034416//bisphosphoglycerate phosphatase activity;GO:0016791//phosphatase activity;GO:0042578//phosphoric ester hydrolase activity;GO:0003824//catalytic activity;GO:0016788//hydrolase activity, acting on ester bonds	GO:0044237//cellular metabolic process;GO:0009987//cellular process;GO:0008152//metabolic process;GO:0006796//phosphate-containing compound metabolic process;GO:0006793//phosphorus metabolic process
XP_005903701	0	124.37	0.001	1.09667	10.0989	0.00286235	0.183434	no	NUP205	PREDICTED: LOW QUALITY PROTEIN: nuclear pore complex protein Nup205 [Bos mutus]	Genetic Information Processing	Translation	ko03013//RNA transport	K14310	-	-	-
XP_014332474	0	48.84	0.001	1.09667	10.0989	0.0102077	0.310666	no	BRD8	PREDICTED: bromodomain-containing protein 8 isoform X10 [Bos taurus]	-	-	-	-	GO:0005623//cell;GO:0005654//nucleoplasm;GO:0005622//intracellular;GO:0000123//histone acetyltransferase complex;GO:0043229//intracellular organelle;GO:1902494//catalytic complex;GO:0031981//nuclear lumen;GO:0043231//intracellular membrane-bounded organelle;GO:0044424//intracellular part;GO:0044464//cell part;GO:0043189//H4/H2A histone acetyltransferase complex;GO:0043227//membrane-bounded organe…	-	GO:0043933//macromolecular complex subunit organization;GO:0043412//macromolecule modification;GO:0006464//cellular protein modification process;GO:0044237//cellular metabolic process;GO:0016570//histone modification;GO:0016043//cellular component organization;GO:0016569//chromatin modification;GO:0018205//peptidyl-lysine modification;GO:0071704//organic substance metabolic process;GO:0019538//pr…
XP_005905638	0	74.8367	0.001	1.09	10.0901	1.57e-05	0.00831126	up	TNIK	PREDICTED: traf2 and NCK-interacting protein kinase isoform X4 [Bos mutus]	-	-	-	-	-	-	-
XP_005886725	0	25.44	0.001	1.08333	10.0813	0.0235266	0.420164	no	LOC102277717	protein C9orf72 homolog [Bos taurus]	-	-	-	-	-	-	-
XP_005910630	0	123.257	0.001	1.08	10.0768	0.00289245	0.183573	no	HEATR1	PREDICTED: LOW QUALITY PROTEIN: HEAT repeat-containing protein 1-like, partial [Bos mutus]	Genetic Information Processing	Translation	ko03008//Ribosome biogenesis in eukaryotes	K14550	GO:0044424//intracellular part;GO:0044446//intracellular organelle part;GO:0005622//intracellular;GO:0043229//intracellular organelle;GO:0043227//membrane-bounded organelle;GO:0043233//organelle lumen;GO:0005623//cell;GO:0070013//intracellular organelle lumen;GO:0044464//cell part;GO:0044428//nuclear part;GO:0043231//intracellular membrane-bounded organelle;GO:0044422//organelle part;GO:0005634//…	GO:0097159//organic cyclic compound binding;GO:0003676//nucleic acid binding;GO:0005488//binding;GO:0003723//RNA binding;GO:1901363//heterocyclic compound binding	-
XP_005889161	0	66.4167	0.001	1.07667	10.0724	0.00119365	0.124457	no	ANLN	PREDICTED: actin-binding protein anillin isoform X1 [Bos mutus]	-	-	-	-	GO:0031981//nuclear lumen;GO:0005634//nucleus;GO:0044422//organelle part;GO:0043227//membrane-bounded organelle;GO:0043231//intracellular membrane-bounded organelle;GO:0044446//intracellular organelle part;GO:0005938//cell cortex;GO:0044464//cell part;GO:0043233//organelle lumen;GO:0031974//membrane-enclosed lumen;GO:0005856//cytoskeleton;GO:0044430//cytoskeletal part;GO:0044428//nuclear part;GO:…	GO:0008092//cytoskeletal protein binding;GO:0005488//binding;GO:0005515//protein binding	GO:0007275//multicellular organism development;GO:0090130//tissue migration;GO:0051179//localization;GO:0044767//single-organism developmental process;GO:0016477//cell migration;GO:0048534//hematopoietic or lymphoid organ development;GO:0030097//hemopoiesis;GO:0010631//epithelial cell migration;GO:0048856//anatomical structure development;GO:0048513//animal organ development;GO:0044707//single-mu…
XP_005910300	0	23.9933	0.001	1.07667	10.0724	0.0198603	0.400344	no	FAM200B	PREDICTED: LOW QUALITY PROTEIN: family with sequence similarity 200, member B [Capra hircus]	-	-	-	-	-	-	-
XP_005911263	0	95.4133	0.001	1.07667	10.0724	0.000352654	0.0664228	no	TIAM1	PREDICTED: T-lymphoma invasion and metastasis-inducing protein 1-like isoform X1 [Bos mutus]	Organismal Systems;Cellular Processes;Environmental Information Processing	Signal transduction;Cell motility;Immune system	ko04014//Ras signaling pathway;ko04810//Regulation of actin cytoskeleton;ko04024//cAMP signaling pathway;ko04015//Rap1 signaling pathway;ko04062//Chemokine signaling pathway	K05731	GO:0005623//cell;GO:0030054//cell junction;GO:0005886//plasma membrane;GO:0044459//plasma membrane part;GO:0005911//cell-cell junction;GO:0098552//side of membrane;GO:0044425//membrane part;GO:0071944//cell periphery;GO:0044464//cell part;GO:0016020//membrane;GO:0009898//cytoplasmic side of plasma membrane;GO:0098562//cytoplasmic side of membrane	GO:0005088//Ras guanyl-nucleotide exchange factor activity;GO:0005085//guanyl-nucleotide exchange factor activity;GO:0098772//molecular function regulator;GO:0005089//Rho guanyl-nucleotide exchange factor activity	GO:0051336//regulation of hydrolase activity;GO:0051716//cellular response to stimulus;GO:0006928//movement of cell or subcellular component;GO:0007266//Rho protein signal transduction;GO:0031589//cell-substrate adhesion;GO:0050896//response to stimulus;GO:0007165//signal transduction;GO:0051345//positive regulation of hydrolase activity;GO:0051674//localization of cell;GO:0051179//localization;G…
XP_014332554	0	54.6633	0.001	1.07667	10.0724	4.24e-05	0.0172599	up	DIP2B	PREDICTED: disco-interacting protein 2 homolog B, partial [Bos mutus]	-	-	-	-	GO:0044424//intracellular part;GO:0005623//cell;GO:0044464//cell part;GO:0043226//organelle;GO:0043227//membrane-bounded organelle;GO:0005622//intracellular	-	-
XP_014337694	0	68.65	0.001	1.07667	10.0724	0.00156513	0.140835	no	AGTPBP1	Cytosolic carboxypeptidase 1, partial [Bos mutus]	-	-	-	-	GO:0044464//cell part;GO:0044425//membrane part;GO:0043227//membrane-bounded organelle;GO:0016020//membrane;GO:0044444//cytoplasmic part;GO:0005622//intracellular;GO:0005737//cytoplasm;GO:0044424//intracellular part;GO:0043231//intracellular membrane-bounded organelle;GO:0031224//intrinsic component of membrane;GO:0043229//intracellular organelle;GO:0043226//organelle;GO:0005623//cell	GO:0016787//hydrolase activity;GO:0043167//ion binding;GO:0005515//protein binding;GO:0003824//catalytic activity;GO:0005488//binding;GO:0043169//cation binding;GO:0008233//peptidase activity;GO:0046872//metal ion binding;GO:0008238//exopeptidase activity;GO:0070011//peptidase activity, acting on L-amino acid peptides;GO:0008235//metalloexopeptidase activity;GO:0046914//transition metal ion bindi…	GO:0043687//post-translational protein modification;GO:0007399//nervous system development;GO:0048856//anatomical structure development;GO:0021549//cerebellum development;GO:0060322//head development;GO:0007275//multicellular organism development;GO:0008152//metabolic process;GO:0043412//macromolecule modification;GO:0036211//protein modification process;GO:0019538//protein metabolic process;GO:0…
XP_005891419	0	83.5433	0.001	1.06667	10.0589	0.00037866	0.0688532	no	RIC1	PREDICTED: protein RIC1 homolog isoform X1 [Bos mutus]	-	-	-	-	GO:0032991//macromolecular complex;GO:0044424//intracellular part;GO:0043234//protein complex;GO:0005623//cell;GO:0005622//intracellular;GO:0044464//cell part;GO:0032045//guanyl-nucleotide exchange factor complex	GO:0005088//Ras guanyl-nucleotide exchange factor activity;GO:0017016//Ras GTPase binding;GO:0019899//enzyme binding;GO:0098772//molecular function regulator;GO:0005085//guanyl-nucleotide exchange factor activity;GO:0031267//small GTPase binding;GO:0005488//binding;GO:0051020//GTPase binding;GO:0005515//protein binding	GO:0051234//establishment of localization;GO:0009895//negative regulation of catabolic process;GO:0006810//transport;GO:0065007//biological regulation;GO:0048519//negative regulation of biological process;GO:0043087//regulation of GTPase activity;GO:0051179//localization;GO:0050790//regulation of catalytic activity;GO:0009894//regulation of catabolic process;GO:0031323//regulation of cellular met…
XP_005893427	0	48.6433	0.001	1.06667	10.0589	0.0102829	0.312171	no	PAXBP1	PREDICTED: PAX3- and PAX7-binding protein 1 [Bos mutus]	-	-	-	-	GO:0043229//intracellular organelle;GO:0044424//intracellular part;GO:0005622//intracellular;GO:0043226//organelle;GO:0005623//cell;GO:0044444//cytoplasmic part;GO:0044464//cell part;GO:0043231//intracellular membrane-bounded organelle;GO:0043227//membrane-bounded organelle;GO:0005737//cytoplasm	GO:0005488//binding;GO:0005515//protein binding;GO:0003676//nucleic acid binding;GO:0097159//organic cyclic compound binding;GO:1901363//heterocyclic compound binding;GO:0001071//nucleic acid binding transcription factor activity	GO:0014855//striated muscle cell proliferation;GO:0044267//cellular protein metabolic process;GO:0044699//single-organism process;GO:0009987//cellular process;GO:0034645//cellular macromolecule biosynthetic process;GO:0046483//heterocycle metabolic process;GO:0008152//metabolic process;GO:0009059//macromolecule biosynthetic process;GO:0048522//positive regulation of cellular process;GO:0009058//b…
XP_005908519	0	26.0967	0.001	1.06667	10.0589	0.0127873	0.34093	no	SLC25A25	PREDICTED: calcium-binding mitochondrial carrier protein SCaMC-2 isoform X2 [Bos mutus]	-	-	-	-	GO:0031967//organelle envelope;GO:0005576//extracellular region;GO:0005623//cell;GO:0043229//intracellular organelle;GO:0043227//membrane-bounded organelle;GO:0044422//organelle part;GO:0044424//intracellular part;GO:1903561//extracellular vesicle;GO:0044425//membrane part;GO:0044464//cell part;GO:0043231//intracellular membrane-bounded organelle;GO:0043230//extracellular organelle;GO:0044421//ex…	GO:0043169//cation binding;GO:0046872//metal ion binding;GO:0005488//binding;GO:0043167//ion binding	GO:0048731//system development;GO:0032502//developmental process;GO:0044767//single-organism developmental process;GO:1901135//carbohydrate derivative metabolic process;GO:0006807//nitrogen compound metabolic process;GO:0009117//nucleotide metabolic process;GO:0032501//multicellular organismal process;GO:0006753//nucleoside phosphate metabolic process;GO:0055086//nucleobase-containing small molec…
XP_005891244	0	27.3667	0.001	1.06	10.0498	0.000337067	0.0653611	no	CLN5	PREDICTED: ceroid-lipofuscinosis neuronal protein 5 [Bos mutus]	Cellular Processes	Transport and catabolism	ko04142//Lysosome	K12390	GO:0031224//intrinsic component of membrane;GO:0043227//membrane-bounded organelle;GO:0043226//organelle;GO:0044425//membrane part;GO:0044424//intracellular part;GO:0043231//intracellular membrane-bounded organelle;GO:0005737//cytoplasm;GO:0043229//intracellular organelle;GO:0044464//cell part;GO:0005773//vacuole;GO:0000323//lytic vacuole;GO:0005623//cell;GO:0005764//lysosome;GO:0016020//membrane…	-	GO:0044767//single-organism developmental process;GO:0045851//pH reduction;GO:0044763//single-organism cellular process;GO:0055067//monovalent inorganic cation homeostasis;GO:0044710//single-organism metabolic process;GO:0065007//biological regulation;GO:0050877//neurological system process;GO:0007275//multicellular organism development;GO:0016485//protein processing;GO:0071840//cellular componen…
XP_014337027	0	40.0533	0.001	1.06	10.0498	0.0136442	0.350817	no	DLG4	PREDICTED: disks large homolog 4 isoform X7 [Bos taurus]	Organismal Systems;Environmental Information Processing	Nervous system;Signal transduction	ko04390//Hippo signaling pathway;ko04724//Glutamatergic synapse	K11828	-	-	-
XP_005888547	0	6.51667	0.001	1.05667	10.0453	0.0447512	0.528823	no	TMEM126A	PREDICTED: transmembrane protein 126A [Bos mutus]	-	-	-	-	GO:0031224//intrinsic component of membrane;GO:0043227//membrane-bounded organelle;GO:0043229//intracellular organelle;GO:0044425//membrane part;GO:0043226//organelle;GO:0019866//organelle inner membrane;GO:0016020//membrane;GO:0031090//organelle membrane;GO:0044422//organelle part;GO:0043231//intracellular membrane-bounded organelle;GO:0044424//intracellular part;GO:0005622//intracellular;GO:004…	-	GO:0044767//single-organism developmental process;GO:0048856//anatomical structure development;GO:0032502//developmental process;GO:0044707//single-multicellular organism process;GO:0021675//nerve development;GO:0048731//system development;GO:0032501//multicellular organismal process;GO:0044699//single-organism process;GO:0021545//cranial nerve development;GO:0007399//nervous system development;G…
XM_005895301	0	8.23	0.001	1.05333	10.0407	0.00763413	0.275035	no	FGF17	PREDICTED: Bos mutus fibroblast growth factor 17 (FGF17), transcript variant X2, mRNA	Cellular Processes;Environmental Information Processing	Signal transduction;Cell motility	ko04151//PI3K-Akt signaling pathway;ko04010//MAPK signaling pathway;ko04014//Ras signaling pathway;ko04810//Regulation of actin cytoskeleton;ko04015//Rap1 signaling pathway	K04358	-	GO:0005102//receptor binding;GO:0005104//fibroblast growth factor receptor binding;GO:0005515//protein binding;GO:0070851//growth factor receptor binding;GO:0005488//binding	GO:0007166//cell surface receptor signaling pathway;GO:0044699//single-organism process;GO:0007169//transmembrane receptor protein tyrosine kinase signaling pathway;GO:0009987//cellular process;GO:0007165//signal transduction;GO:0050794//regulation of cellular process;GO:0051716//cellular response to stimulus;GO:0044700//single organism signaling;GO:0023052//signaling;GO:0050896//response to stim…
XP_014333764	0	10.99	0.001	1.05333	10.0407	0.0480036	0.538175	no	DSN1	PREDICTED: kinetochore-associated protein DSN1 homolog isoform X4 [Bubalus bubalis]	-	-	-	-	GO:0005623//cell;GO:0044464//cell part;GO:0043229//intracellular organelle;GO:0044424//intracellular part;GO:0043231//intracellular membrane-bounded organelle;GO:0005622//intracellular;GO:0043226//organelle;GO:0043227//membrane-bounded organelle	-	GO:0009987//cellular process;GO:0044763//single-organism cellular process;GO:0044699//single-organism process
XP_005906403	0	35.1967	0.001	1.05	10.0362	0.015644	0.364395	no	RRN3	PREDICTED: RNA polymerase I-specific transcription initiation factor RRN3 [Bos mutus]	-	-	-	-	GO:0031981//nuclear lumen;GO:0044424//intracellular part;GO:0044446//intracellular organelle part;GO:0043231//intracellular membrane-bounded organelle;GO:0043227//membrane-bounded organelle;GO:0031974//membrane-enclosed lumen;GO:0044428//nuclear part;GO:0044422//organelle part;GO:0044464//cell part;GO:0043229//intracellular organelle;GO:0070013//intracellular organelle lumen;GO:0043233//organelle…	GO:0005515//protein binding;GO:0019899//enzyme binding;GO:0005488//binding	GO:0019438//aromatic compound biosynthetic process;GO:0018130//heterocycle biosynthetic process;GO:0043009//chordate embryonic development;GO:0071704//organic substance metabolic process;GO:0009059//macromolecule biosynthetic process;GO:0044249//cellular biosynthetic process;GO:0071840//cellular component organization or biogenesis;GO:0006352//DNA-templated transcription, initiation;GO:0072332//i…
XP_014332540	0	12.19	0.001	1.05	10.0362	0.0238397	0.422521	no	WDYHV1	PREDICTED: protein N-terminal glutamine amidohydrolase isoform X3 [Ovis aries musimon]	-	-	-	-	GO:0043231//intracellular membrane-bounded organelle;GO:0005623//cell;GO:0043227//membrane-bounded organelle;GO:0044424//intracellular part;GO:0043229//intracellular organelle;GO:0043226//organelle;GO:0005737//cytoplasm;GO:0044444//cytoplasmic part;GO:0005622//intracellular;GO:0044464//cell part	GO:0016787//hydrolase activity;GO:0016810//hydrolase activity, acting on carbon-nitrogen (but not peptide) bonds;GO:0016811//hydrolase activity, acting on carbon-nitrogen (but not peptide) bonds, in linear amides;GO:0003824//catalytic activity	GO:0071704//organic substance metabolic process;GO:0043412//macromolecule modification;GO:0019538//protein metabolic process;GO:0043170//macromolecule metabolic process;GO:0008152//metabolic process;GO:0044238//primary metabolic process;GO:0036211//protein modification process
XM_014480362	0	15.0867	0.001	1.04667	10.0316	0.0337099	0.480671	no	RGS3	PREDICTED: Bos mutus regulator of G-protein signaling 3 (RGS3), transcript variant X10, mRNA	Organismal Systems	Development	ko04360//Axon guidance	K07524	-	-	-
XP_005889068	0	38.77	0.001	1.04667	10.0316	0.0142154	0.357025	no	GZF1	PREDICTED: GDNF-inducible zinc finger protein 1 [Bos mutus]	-	-	-	-	GO:0044428//nuclear part;GO:0005634//nucleus;GO:0031974//membrane-enclosed lumen;GO:0005623//cell;GO:0031981//nuclear lumen;GO:0043227//membrane-bounded organelle;GO:0043233//organelle lumen;GO:0044464//cell part;GO:0005622//intracellular;GO:0044424//intracellular part;GO:0044446//intracellular organelle part;GO:0043226//organelle;GO:0043231//intracellular membrane-bounded organelle;GO:0044422//o…	GO:0003676//nucleic acid binding;GO:0043565//sequence-specific DNA binding;GO:0043169//cation binding;GO:0005488//binding;GO:0044212//transcription regulatory region DNA binding;GO:1990837//sequence-specific double-stranded DNA binding;GO:0001227//transcriptional repressor activity, RNA polymerase II transcription regulatory region sequence-specific binding;GO:0043167//ion binding;GO:0000975//reg…	GO:0009888//tissue development;GO:0018130//heterocycle biosynthetic process;GO:0009653//anatomical structure morphogenesis;GO:0034654//nucleobase-containing compound biosynthetic process;GO:0044237//cellular metabolic process;GO:0035295//tube development;GO:0046483//heterocycle metabolic process;GO:0048856//anatomical structure development;GO:0034641//cellular nitrogen compound metabolic process;…
XP_005899176	0	37.2367	0.001	1.04667	10.0316	0.0148202	0.359105	no	HBS1L	PREDICTED: HBS1-like protein isoform X1 [Bos mutus]	Genetic Information Processing	Translation	ko03015//mRNA surveillance pathway	K14416	-	-	-
XP_005902140	0	26.6633	0.001	1.04333	10.027	0.0220448	0.411837	no	PDE1B	PREDICTED: calcium/calmodulin-dependent 3',5'-cyclic nucleotide phosphodiesterase 1B isoform X2 [Bos taurus]	Metabolism;Organismal Systems;Environmental Information Processing	Nucleotide metabolism;Signal transduction;Endocrine system	ko04020//Calcium signaling pathway;ko00230//Purine metabolism;ko04924//Renin secretion	K13755	GO:0044424//intracellular part;GO:0044464//cell part;GO:0005622//intracellular;GO:0005623//cell	GO:0008081//phosphoric diester hydrolase activity;GO:0042578//phosphoric ester hydrolase activity;GO:0005488//binding;GO:0016788//hydrolase activity, acting on ester bonds;GO:0043167//ion binding;GO:0005515//protein binding;GO:0004112//cyclic-nucleotide phosphodiesterase activity;GO:0047555//3',5'-cyclic-GMP phosphodiesterase activity;GO:0003824//catalytic activity;GO:0004114//3',5'-cyclic-nucleo…	GO:0044699//single-organism process;GO:0051171//regulation of nitrogen compound metabolic process;GO:0030097//hemopoiesis;GO:0019693//ribose phosphate metabolic process;GO:0044237//cellular metabolic process;GO:0080090//regulation of primary metabolic process;GO:1901361//organic cyclic compound catabolic process;GO:0065007//biological regulation;GO:0032501//multicellular organismal process;GO:003…
XP_005889635	0	47.71	0.001	1.04	10.0224	0.0106012	0.313984	no	PIWIL1	PREDICTED: piwi-like protein 1 [Bos taurus]	Organismal Systems	Development	ko04320//Dorso-ventral axis formation	K02156	GO:0036464//cytoplasmic ribonucleoprotein granule;GO:0043231//intracellular membrane-bounded organelle;GO:1990904//ribonucleoprotein complex;GO:0030529//intracellular ribonucleoprotein complex;GO:0043227//membrane-bounded organelle;GO:0044424//intracellular part;GO:0005737//cytoplasm;GO:0005623//cell;GO:0034518//RNA cap binding complex;GO:0043228//non-membrane-bounded organelle;GO:0032991//macrom…	GO:0019899//enzyme binding;GO:0003676//nucleic acid binding;GO:1901363//heterocyclic compound binding;GO:0097159//organic cyclic compound binding;GO:0044822//poly(A) RNA binding;GO:0003723//RNA binding;GO:0019900//kinase binding;GO:0005515//protein binding;GO:0005488//binding	GO:0048856//anatomical structure development;GO:0006139//nucleobase-containing compound metabolic process;GO:0048869//cellular developmental process;GO:0006725//cellular aromatic compound metabolic process;GO:0003006//developmental process involved in reproduction;GO:0044703//multi-organism reproductive process;GO:0030154//cell differentiation;GO:0006807//nitrogen compound metabolic process;GO:00…
XP_014332628	0	21.9333	0.001	1.04	10.0224	0.00534406	0.243121	no	KLHL32	PREDICTED: kelch-like protein 32 isoform X3 [Pantholops hodgsonii]	-	-	-	-	-	-	-
XP_014336480	0	25.4933	0.001	1.04	10.0224	0.0235273	0.420164	no	ABAT	PREDICTED: LOW QUALITY PROTEIN: 4-aminobutyrate aminotransferase, mitochondrial [Bos mutus]	Organismal Systems;Metabolism	Nervous system;Carbohydrate metabolism;Metabolism of other amino acids;Amino acid metabolism	ko04727//GABAergic synapse;ko00280//Valine, leucine and isoleucine degradation;ko00250//Alanine, aspartate and glutamate metabolism;ko00640//Propanoate metabolism;ko00410//beta-Alanine metabolism;ko00650//Butanoate metabolism	K13524	-	-	-
XM_014481895	0	15.2	0.001	1.03667	10.0177	0.0333049	0.478815	no	TUBB	PREDICTED: Bos mutus tubulin, beta class I (TUBB), transcript variant X4, mRNA	Cellular Processes	Transport and catabolism;Cellular commiunity	ko04145//Phagosome;ko04540//Gap junction	K07375	GO:0044422//organelle part;GO:0044428//nuclear part;GO:0043231//intracellular membrane-bounded organelle;GO:0044464//cell part;GO:0043226//organelle;GO:0043232//intracellular non-membrane-bounded organelle;GO:0015630//microtubule cytoskeleton;GO:0031975//envelope;GO:0043227//membrane-bounded organelle;GO:0043230//extracellular organelle;GO:0012505//endomembrane system;GO:1903561//extracellular ve…	GO:0005515//protein binding;GO:0019899//enzyme binding;GO:0032549//ribonucleoside binding;GO:0005488//binding;GO:0001883//purine nucleoside binding;GO:0036094//small molecule binding;GO:0097159//organic cyclic compound binding;GO:0016818//hydrolase activity, acting on acid anhydrides, in phosphorus-containing anhydrides;GO:1901363//heterocyclic compound binding;GO:0005102//receptor binding;GO:000…	GO:0044763//single-organism cellular process;GO:0051179//localization;GO:0051641//cellular localization;GO:0046907//intracellular transport;GO:0022607//cellular component assembly;GO:1902578//single-organism localization;GO:0009987//cellular process;GO:1902582//single-organism intracellular transport;GO:0044085//cellular component biogenesis;GO:0051234//establishment of localization;GO:0044699//s…
XP_005887810	0	20.4067	0.001	1.03667	10.0177	0.00706197	0.271309	no	SGK1	PREDICTED: serine/threonine-protein kinase Sgk1 isoform X5 [Ovis aries]	Organismal Systems;Environmental Information Processing	Signal transduction;Excretory system	ko04151//PI3K-Akt signaling pathway;ko04068//FoxO signaling pathway;ko04960//Aldosterone-regulated sodium reabsorption	K13302	-	-	-
XP_005897283	0	18.6533	0.001	1.03333	10.0131	0.0332688	0.478815	no	LHX9	PREDICTED: LIM/homeobox protein Lhx9 isoform X2 [Bos mutus]	-	-	-	-	GO:0005623//cell;GO:0044424//intracellular part;GO:0043226//organelle;GO:0043229//intracellular organelle;GO:0043227//membrane-bounded organelle;GO:0043231//intracellular membrane-bounded organelle;GO:0005622//intracellular;GO:0044464//cell part	GO:0000988//transcription factor activity, protein binding;GO:0003677//DNA binding;GO:0046914//transition metal ion binding;GO:0097159//organic cyclic compound binding;GO:0003676//nucleic acid binding;GO:0046872//metal ion binding;GO:0000989//transcription factor activity, transcription factor binding;GO:0043167//ion binding;GO:0005488//binding;GO:0003712//transcription cofactor activity;GO:00431…	GO:0030154//cell differentiation;GO:0006807//nitrogen compound metabolic process;GO:0071704//organic substance metabolic process;GO:0044238//primary metabolic process;GO:0007548//sex differentiation;GO:0046483//heterocycle metabolic process;GO:0097659//nucleic acid-templated transcription;GO:0090304//nucleic acid metabolic process;GO:0032989//cellular component morphogenesis;GO:0044699//single-or…
XP_005906052	0	26.1167	0.001	1.03	10.0084	0.0227257	0.41579	no	TSTD2	PREDICTED: thiosulfate sulfurtransferase/rhodanese-like domain-containing protein 2 [Bos mutus]	-	-	-	-	-	-	-
XP_005893583	0	39.66	0.001	1.02667	10.0038	0.00281713	0.182246	no	FCHSD2	PREDICTED: FCH and double SH3 domains protein 2 isoform X2 [Bos mutus]	-	-	-	-	-	-	-
XP_014334797	0	172.073	0.001	1.02667	10.0038	0.00177053	0.151781	no	UBR5	PREDICTED: LOW QUALITY PROTEIN: E3 ubiquitin-protein ligase UBR5 [Bos mutus]	Genetic Information Processing	Folding, sorting and degradation	ko04120//Ubiquitin mediated proteolysis	K10593	-	-	-
XP_005893974	0	25.7867	0.001	1.02333	9.99906	0.0230355	0.416745	no	CCDC61	PREDICTED: coiled-coil domain-containing protein 61 [Bos mutus]	-	-	-	-	-	-	-
XP_005889959	0	29.5267	0.001	1.02	9.99435	0.00379056	0.207278	no	MSL2	PREDICTED: E3 ubiquitin-protein ligase MSL2 [Bos taurus]	-	-	-	-	GO:0031981//nuclear lumen;GO:0032991//macromolecular complex;GO:0005623//cell;GO:1902493//acetyltransferase complex;GO:0070013//intracellular organelle lumen;GO:0044424//intracellular part;GO:0043234//protein complex;GO:0043231//intracellular membrane-bounded organelle;GO:1990234//transferase complex;GO:0005654//nucleoplasm;GO:0044451//nucleoplasm part;GO:0005622//intracellular;GO:0043233//organe…	GO:0016740//transferase activity;GO:0046872//metal ion binding;GO:0003824//catalytic activity;GO:0004842//ubiquitin-protein transferase activity;GO:0043167//ion binding;GO:0005488//binding;GO:0019787//ubiquitin-like protein transferase activity;GO:0043169//cation binding;GO:0046914//transition metal ion binding	GO:0006475//internal protein amino acid acetylation;GO:0018193//peptidyl-amino acid modification;GO:0044267//cellular protein metabolic process;GO:0071704//organic substance metabolic process;GO:0044260//cellular macromolecule metabolic process;GO:0043933//macromolecular complex subunit organization;GO:0016043//cellular component organization;GO:0008152//metabolic process;GO:0070647//protein modi…
XP_014335413	0	68.3233	0.001	1.01667	9.98963	0.000896209	0.105124	no	RRP12	RRP12-like protein [Bos taurus]	-	-	-	-	-	GO:0003676//nucleic acid binding;GO:0005488//binding;GO:1901363//heterocyclic compound binding;GO:0097159//organic cyclic compound binding;GO:0003723//RNA binding	-
XM_005901844	0	50.41	0.001	1.00333	9.97059	0.00995574	0.306129	no	PTPDC1	PREDICTED: Bos mutus protein tyrosine phosphatase domain containing 1 (PTPDC1), transcript variant X1, mRNA	-	-	-	-	-	-	-
XP_005902336	0	107.33	0.001	1.00333	9.97059	0.00349423	0.19929	no	DENND4C	PREDICTED: LOW QUALITY PROTEIN: DENN domain-containing protein 4C [Bos mutus]	-	-	-	-	GO:0031982//vesicle;GO:0043227//membrane-bounded organelle;GO:0031988//membrane-bounded vesicle;GO:0016020//membrane;GO:0043226//organelle;GO:0005623//cell;GO:0043231//intracellular membrane-bounded organelle;GO:0043229//intracellular organelle;GO:0005737//cytoplasm;GO:0031410//cytoplasmic vesicle;GO:0044444//cytoplasmic part;GO:0005622//intracellular;GO:0044424//intracellular part;GO:0097708//in…	GO:0005088//Ras guanyl-nucleotide exchange factor activity;GO:0005085//guanyl-nucleotide exchange factor activity;GO:0098772//molecular function regulator	GO:0009987//cellular process;GO:0044802//single-organism membrane organization;GO:0051336//regulation of hydrolase activity;GO:1901700//response to oxygen-containing compound;GO:0061024//membrane organization;GO:0044699//single-organism process;GO:0009719//response to endogenous stimulus;GO:0007009//plasma membrane organization;GO:0016043//cellular component organization;GO:0044763//single-organi…
XM_014478512	0	68.55	0.001	1	9.96578	0.000697889	0.0937827	no	GALC	PREDICTED: Bos mutus galactosylceramidase (GALC), transcript variant X2, mRNA	Metabolism;Cellular Processes	Lipid metabolism;Transport and catabolism	ko04142//Lysosome;ko00600//Sphingolipid metabolism	K01202	GO:0043229//intracellular organelle;GO:0043231//intracellular membrane-bounded organelle;GO:0005622//intracellular;GO:0044424//intracellular part;GO:0044464//cell part;GO:0043227//membrane-bounded organelle;GO:0005623//cell;GO:0043226//organelle	-	GO:0044255//cellular lipid metabolic process;GO:0044237//cellular metabolic process;GO:0044699//single-organism process;GO:0006629//lipid metabolic process;GO:0006687//glycosphingolipid metabolic process;GO:1901564//organonitrogen compound metabolic process;GO:1903509//liposaccharide metabolic process;GO:0006677//glycosylceramide metabolic process;GO:0044710//single-organism metabolic process;GO:…
XP_014337217	0	56.8333	0.001	1	9.96578	0.00850119	0.287574	no	TTC7B	PREDICTED: LOW QUALITY PROTEIN: tetratricopeptide repeat protein 7B [Bison bison bison]	-	-	-	-	-	-	-
XP_005888127	0	104.053	0.001	0.996667	9.96097	0.00363603	0.20327	no	GBF1	PREDICTED: golgi-specific brefeldin A-resistance guanine nucleotide exchange factor 1 isoform X3 [Bos mutus]	Cellular Processes	Transport and catabolism	ko04144//Endocytosis	K18443	GO:0043226//organelle;GO:0005622//intracellular;GO:0044444//cytoplasmic part;GO:0005794//Golgi apparatus;GO:0043229//intracellular organelle;GO:0043227//membrane-bounded organelle;GO:0044464//cell part;GO:0005737//cytoplasm;GO:0012505//endomembrane system;GO:0044424//intracellular part;GO:0005623//cell;GO:0043231//intracellular membrane-bounded organelle	GO:0098772//molecular function regulator;GO:0035091//phosphatidylinositol binding;GO:0008289//lipid binding;GO:1902936//phosphatidylinositol bisphosphate binding;GO:0005085//guanyl-nucleotide exchange factor activity;GO:0005488//binding;GO:1901981//phosphatidylinositol phosphate binding;GO:0005543//phospholipid binding	GO:0007030//Golgi organization;GO:0051648//vesicle localization;GO:0060326//cell chemotaxis;GO:0065007//biological regulation;GO:0044763//single-organism cellular process;GO:0051656//establishment of organelle localization;GO:0010256//endomembrane system organization;GO:0006810//transport;GO:0051179//localization;GO:0035964//COPI-coated vesicle budding;GO:0044700//single organism signaling;GO:000…
XP_005888289	0	43.9367	0.001	0.996667	9.96097	0.0119351	0.331671	no	VPS53	vacuolar protein sorting-associated protein 53 homolog [Bos taurus]	-	-	-	-	GO:0005768//endosome;GO:0005773//vacuole;GO:0043226//organelle;GO:0032991//macromolecular complex;GO:0016023//cytoplasmic, membrane-bounded vesicle;GO:0005622//intracellular;GO:0012505//endomembrane system;GO:0097708//intracellular vesicle;GO:0031988//membrane-bounded vesicle;GO:0005623//cell;GO:0044464//cell part;GO:0043229//intracellular organelle;GO:0043227//membrane-bounded organelle;GO:00444…	-	GO:0051234//establishment of localization;GO:0051179//localization;GO:0006810//transport;GO:0016192//vesicle-mediated transport
XP_005908731	0	65.5233	0.001	0.996667	9.96097	0.00691819	0.269098	no	TAF2	PREDICTED: transcription initiation factor TFIID subunit 2 [Bos mutus]	Genetic Information Processing	Transcription	ko03022//Basal transcription factors	K03128	GO:0044464//cell part;GO:0005622//intracellular;GO:0032991//macromolecular complex;GO:0061695//transferase complex, transferring phosphorus-containing groups;GO:0031981//nuclear lumen;GO:1902494//catalytic complex;GO:1990234//transferase complex;GO:0044446//intracellular organelle part;GO:0005623//cell;GO:0016591//DNA-directed RNA polymerase II, holoenzyme;GO:0044424//intracellular part;GO:004445…	GO:1901363//heterocyclic compound binding;GO:0003676//nucleic acid binding;GO:0046872//metal ion binding;GO:0097159//organic cyclic compound binding;GO:0005488//binding;GO:0043169//cation binding;GO:0070011//peptidase activity, acting on L-amino acid peptides;GO:0046914//transition metal ion binding;GO:0001067//regulatory region nucleic acid binding;GO:0003824//catalytic activity;GO:0016787//hydr…	GO:0044271//cellular nitrogen compound biosynthetic process;GO:0016070//RNA metabolic process;GO:1901360//organic cyclic compound metabolic process;GO:0090304//nucleic acid metabolic process;GO:0044260//cellular macromolecule metabolic process;GO:0010467//gene expression;GO:0006351//transcription, DNA-templated;GO:1901362//organic cyclic compound biosynthetic process;GO:0044237//cellular metaboli…
XP_005906130	0.333333	316.93	0.02	19.91	9.95928	1.87e-05	0.00934461	up	ENO3	PREDICTED: beta-enolase isoform X1 [Bos taurus]	Environmental Information Processing;Genetic Information Processing;Metabolism	Folding, sorting and degradation;Carbohydrate metabolism;Global and Overview;Signal transduction	ko01200//Carbon metabolism;ko04066//HIF-1 signaling pathway;ko01230//Biosynthesis of amino acids;ko03018//RNA degradation;ko00010//Glycolysis / Gluconeogenesis	K01689	GO:0044421//extracellular region part;GO:1903561//extracellular vesicle;GO:0043227//membrane-bounded organelle;GO:0043226//organelle;GO:0005623//cell;GO:0016020//membrane;GO:0044424//intracellular part;GO:0005622//intracellular;GO:0044464//cell part;GO:0043230//extracellular organelle;GO:0031982//vesicle;GO:0005576//extracellular region	GO:0016829//lyase activity;GO:0016836//hydro-lyase activity;GO:0043167//ion binding;GO:0003824//catalytic activity;GO:0046872//metal ion binding;GO:0016835//carbon-oxygen lyase activity;GO:0043169//cation binding;GO:0005488//binding	GO:0006082//organic acid metabolic process;GO:0019752//carboxylic acid metabolic process;GO:0044281//small molecule metabolic process;GO:0032787//monocarboxylic acid metabolic process;GO:0009987//cellular process;GO:0008152//metabolic process;GO:0071704//organic substance metabolic process;GO:0044237//cellular metabolic process;GO:0044763//single-organism cellular process;GO:0044699//single-organ…
[truncated: 3,846 more rows]
